# Supplementary material for: Pi-Pi contacts are an overlooked protein feature relevant to phase separation
Source: eLife journal article supplement (doi:10.7554/elife.31486), 2018-02-09
Supplement: supp [file elife-31486-supp-v1.zip]

Archive with 14 entries (14 files):
- elife_poa_e31486_Figure_3_figure_supplement_2.ai
- elife_poa_e31486_Source_code_file_2.tgz
- elife_poa_e31486_Figure_1_figure_supplement_1.ai
- elife_poa_e31486_Figure_1_source_data_2.txt
- elife_poa_e31486_Figure_3_figure_supplement_1.ai
- elife_poa_e31486_Figure_1_source_data_1.txt
- elife_poa_e31486_Figure_8_figure_supplement_1.ai
- elife_poa_e31486_Figure_5_source_data_2.xls
- elife_poa_e31486_Figure_5_figure_supplement_1.ai
- elife_poa_e31486_Figure_1_figure_supplement_2.ai
- elife_poa_e31486_Source_code_file_1.tar
- elife_poa_e31486_Figure_5_source_data_1.xls
- elife_poa_e31486_Figure_5_figure_supplement_2.ai
- elife_poa_e31486_Transparent_Reporting_File.pdf
