# Supplementary material for: Pi-Pi contacts are an overlooked protein feature relevant to phase separation
Source: eLife journal article supplement (doi:10.7554/elife.31486), 2018-02-09
Supplement: supp [file elife-31486-supp-v1.zip › elife_poa_e31486_Figure_1_source_data_1.txt]

4lflA             A.17.GLN*A.111.TYR
4lflA      A.109.THRGLY*C.109.THRGLY
4lflA        A.63.ASPARG*A.10.ASPGLY
4lflA           A.86.GLU*A.86.GLUGLU
4lflA              A.65.TYR*B.94.TYR
4lflA           A.34.PROGLU*A.35.GLU
4lflA             A.96.HIS*A.131.HIS
4lflA           A.62.PHE*A.14.METLYS
4lflA          A.88.ASN*D.114.HISLEU
4lflA           A.40.PHE*A.68.GLYSER
2oqrA            A.143.HIS*A.159.PHE
2oqrA      A.208.ASPPRO*A.206.GLUALA
2oqrA            A.181.ARG*A.164.TYR
2oqrA           A.98.TYR*A.99.VALTHR
2oqrA            A.117.ARG*A.181.ARG
1vdkA         A.304.ALAGLY*B.401.TYR
1vdkA         A.134.VALASN*A.108.ASN
1vdkA         A.312.PROALA*A.314.ASN
1vdkA         A.327.PROTHR*A.331.GLU
1vdkA         A.264.ARG*A.228.GLYGLY
1vdkA             A.58.ARG*A.249.TYR
1vdkA         A.191.ASP*B.301.GLYPRO
1vdkA      A.263.ASNARG*A.261.ALAGLU
1vdkA         A.156.LEUHIS*A.161.TYR
1vdkA           A.96.GLNTHR*A.32.PHE
1vdkA            A.129.HIS*A.132.ASP
1vdkA         A.450.PHE*A.435.LEULYS
1vdkA         A.314.ASNGLU*A.315.GLU
1vdkA            A.188.HIS*B.326.ASN
1vdkA         A.233.GLYTHR*A.265.PHE
1vdkA            A.297.TRP*B.297.TRP
1vdkA         A.301.GLYPRO*B.191.ASP
1vdkA            A.345.HIS*B.345.HIS
1vdkA         A.382.SERPHE*A.329.GLN
1vdkA         A.356.PHEGLN*A.357.GLN
1vdkA            A.326.ASN*B.188.HIS
4feyA         A.364.ILESER*A.363.TYR
4feyA         A.269.SERGLU*A.320.PHE
4feyA            A.114.PHE*A.111.ASN
4feyA         A.136.PHE*A.137.VALMET
4feyA              A.23.ASN*A.59.HIS
4feyA      A.323.PHEALA*A.317.VALPHE
4feyA         A.227.PHE*A.225.GLUGLY
4feyA         A.296.GLN*A.325.GLUGLY
4feyA         A.369.GLYALA*A.145.HIS
4feyA            A.318.PHE*A.319.GLU
4feyA      A.262.VALARG*A.291.ILEGLY
4feyA         A.376.GLUGLY*A.203.ASN
4feyA           A.72.PHE*A.62.ARGPRO
4feyA         A.208.VALGLU*A.209.GLU
4feyA         A.323.PHEALA*A.290.ASP
4feyA              A.46.TYR*A.50.GLN
4feyA           A.91.PHE*A.74.LEUGLU
4feyA         A.235.GLUGLN*A.234.TYR
3k1uA            A.142.ASN*A.141.HIS
3k1uA         A.109.ASN*A.118.ASNTRP
3k1uA         A.130.GLUSER*A.103.ARG
3k1uA      A.192.PHETRP*A.189.ILELYS
3k1uA              A.23.ASN*A.22.HIS
3k1uA           A.82.ALATRP*A.78.PHE
3k1uA         A.119.TRP*A.108.GLNASN
3k1uA           A.34.PROGLU*A.36.TYR
3k1uA         A.244.THRPRO*A.187.TRP
3k1uA           A.54.GLU*A.55.PROVAL
3k1uA           A.60.ARGARG*A.59.TRP
3k1uA         A.208.PHE*A.206.LYSILE
3k1uA           A.70.LEUILE*A.72.TRP
3k1uA          A.105.PHEVAL*A.87.PHE
3k1uA            A.169.ASN*A.171.TRP
3k1uA         A.259.GLYHIS*A.277.HIS
3k1uA            A.315.GLU*A.299.GLN
3k1uA         A.256.TYR*A.254.HISGLN
3k1uA           A.30.THRALA*A.29.PHE
3k1uA           A.35.GLUTYR*A.37.ASP
3k1uA            A.255.GLN*A.297.ARG
3k1uA         A.140.GLU*A.140.GLUHIS
3k1uA         A.297.ARGALA*A.276.TYR
3k1uA             A.102.HIS*A.72.TRP
3k1uA            A.129.TRP*A.151.GLN
3k1uA         A.149.TRP*A.163.TYRILE
3k1uA           A.21.LYSHIS*A.20.TYR
3k1uA         A.281.TYRTHR*A.256.TYR
3k1uA           A.81.GLYALA*A.78.PHE
3k1uA           A.46.THRILE*A.27.TYR
3k1uA          A.102.HIS*A.89.ALAALA
3k1uA         A.195.ASN*A.182.LYSPRO
3bxjA      A.566.ARGGLU*A.561.CYSALA
3bxjA         A.642.TRP*A.638.LEUGLU
3bxjA         A.686.PROGLN*A.687.GLN
3bxjA            A.524.HIS*A.508.ASN
3bxjA            A.414.ARG*A.412.HIS
3bxjA            A.624.PHE*A.617.ASN
3bxjA            A.673.GLU*A.438.HIS
3bxjA         A.585.PROALA*A.593.PHE
3bxjA         A.635.ASNGLU*A.639.GLU
3bxjA         A.566.ARGGLU*A.568.ASP
3bxjA      A.491.LEULYS*A.493.ASPALA
3bxjA         A.674.LEUSER*A.402.TYR
3bxjA         A.425.ASN*B.658.LEUTHR
3i36A      A.950.TYRASN*A.948.ASNARG
3i36A        A.982.TYR*A.1136.TYRGLN
3i36A    A.1085.HISGLY*A.1083.PROASP
3i36A        A.981.GLYTYR*A.1133.ARG
3i36A            A.973.TYR*A.944.ASN
3i36A        A.1157.ARG*A.990.ALATHR
3i36A        A.924.TYR*A.1163.THRGLU
3i36A          A.1040.TYR*A.1003.TRP
3i36A        A.1027.LYSCYS*A.949.ARG
3i36A        A.898.LYSLEU*A.1145.ASP
3i36A    A.1019.LYSCYS*A.1021.VALGLU
3i36A         A.920.PHE*A.912.GLNGLN
3i36A         A.973.TYR*A.974.ILEASN
3i36A          A.1012.TYR*A.1072.HIS
3i36A          A.1082.TRP*A.1124.ARG
3i36A         A.912.GLN*A.919.GLYPHE
2cyjA           A.46.HIS*A.73.METLEU
2cyjA           A.54.GLU*A.54.GLULYS
2cyjA        A.44.THRSER*A.38.SERLYS
2cyjA          A.109.ARG*A.60.ASPPHE
2cyjA           A.34.METLYS*A.36.GLU
2cyjA           A.34.METLYS*A.52.GLU
4rw0A             A.127.GLN*A.86.TYR
4rw0A           A.12.ARG*A.13.GLYTYR
4rw0A         A.169.ARGLEU*A.173.TYR
4rw0A              A.14.TYR*A.15.ASP
4rw0A         A.179.PHE*A.175.ALALEU
4rw0A               A.38.TYR*A.6.PHE
4rw0A              A.80.ARG*A.84.TYR
4rw0A         A.156.VALPHE*A.164.ASN
4rw0A            A.154.GLN*B.173.TYR
4be9A            A.403.PHE*A.533.ARG
4be9A         A.480.TYR*A.523.THRLYS
4be9A      A.338.GLNTYR*A.234.GLYGLY
4be9A           A.22.GLYGLU*A.19.TYR
4be9A         A.480.TYR*A.524.LYSALA
4be9A           A.80.GLYASN*A.87.GLN
4be9A         A.132.PHE*A.139.GLYTHR
4be9A      A.223.SERILE*A.253.GLYSER
4be9A           A.21.GLUGLY*A.59.ASN
4be9A         A.446.PROSER*A.448.TRP
4be9A         A.431.ARG*A.431.ARGARG
4be9A      A.326.LEUILE*A.324.VALVAL
4be9A         A.219.GLU*A.219.GLUSER
4be9A            A.167.TYR*A.132.PHE
4be9A         A.170.GLYGLY*A.317.TYR
4be9A         A.165.ILEASN*A.141.ASN
4be9A      A.462.GLYTHR*A.455.ASPTYR
4be9A         A.531.ASN*A.529.ALAASP
4be9A            A.349.GLN*A.468.ASP
4be9A            A.179.GLU*A.270.TYR
4be9A            A.539.TYR*A.543.ASN
4be9A            A.239.TYR*A.198.GLU
4be9A         A.530.ASPASN*A.432.ARG
4be9A            A.141.ASN*A.112.ASN
4be9A         A.130.TRP*A.131.ILEPHE
4be9A         A.403.PHE*A.400.GLYSER
4be9A        A.48.LEUARG*A.44.PROVAL
4be9A      A.266.ALAGLN*A.176.GLYGLY
4be9A         A.388.ALAPHE*A.539.TYR
4be9A             A.49.ARG*A.297.PHE
4be9A      A.153.GLYILE*A.158.GLUPRO
4be9A         A.514.LYSLYS*A.516.ASN
4be9A           A.41.ALAGLN*A.56.TYR
4be9A         A.491.ASN*A.500.LYSGLY
4be9A          A.40.PHE*A.109.LEUTHR
4be9A         A.163.VALALA*A.162.PHE
4hnoA           A.18.PROGLN*A.59.HIS
4hnoA         A.124.ARG*A.120.GLUGLY
4hnoA            A.247.PHE*A.257.TRP
4hnoA         A.137.GLUGLY*A.172.ARG
4hnoA      A.156.LYSLEU*A.154.GLYTYR
4hnoA            A.130.ASN*A.168.ASP
4hnoA            A.30.GLNILE*A.7.HIS
4hnoA         A.209.GLU*A.209.GLUARG
4hnoA         A.237.PHE*A.221.TYRPRO
4hnoA         A.217.ASN*A.215.HISLEU
4hnoA           A.20.ASP*A.16.ARGVAL
4hnoA            A.181.HIS*A.178.ASP
4hnoA            A.230.HIS*A.217.ASN
4hnoA         A.117.GLYGLU*A.113.HIS
4hnoA         A.178.ASPTHR*A.177.TYR
4hnoA            A.148.GLN*A.155.TYR
4elnA         A.147.ASP*A.185.SERALA
4elnA          A.100.ARG*A.96.THRPRO
4elnA         A.238.GLN*A.238.GLNGLY
4elnA      A.260.ARGPRO*A.258.SERGLU
4elnA            A.210.TRP*A.206.GLN
4elnA              A.71.ASN*A.78.GLN
4elnA         A.197.GLNGLY*A.196.TYR
4elnA         A.137.HISPRO*A.139.GLU
4elnA            A.274.PHE*A.292.GLN
4elnA            A.214.ARG*A.210.TRP
4elnA              A.93.PHE*A.85.ARG
4elnA      A.288.LEULYS*A.286.PROARG
4elnA             A.83.TRP*A.224.ARG
1ha4A         A.131.TRP*A.168.ARGARG
1ha4A         A.153.LYSPRO*A.157.TRP
1ha4A         A.134.TYR*A.139.TYRARG
1ha4A       A.122.HISSER*A.95.LYSGLY
1ha4A         A.120.GLU*A.162.PROALA
2bbeA              A.64.PHE*A.50.TYR
2bbeA           A.89.GLN*A.88.HISGLN
2bbeA          A.100.VALGLU*A.99.HIS
2bbeA          A.11.GLNGLN*A.104.HIS
3ch0A           A.40.GLU*A.40.GLUPHE
3ch0A          A.147.HISPRO*A.83.TYR
3ch0A           A.8.PHE*A.258.ASPGLY
3ch0A         A.147.HIS*A.142.GLYASP
3ch0A         A.244.ASN*A.242.THRVAL
3ch0A            A.133.ASN*A.173.GLN
3ch0A              A.14.ARG*A.55.HIS
3ch0A          A.20.LEUPRO*A.106.GLN
3ch0A            A.184.HIS*A.211.PHE
3ch0A            A.197.GLU*A.175.PHE
3ch0A             A.8.PHE*A.9.ASPILE
3ch0A          A.41.PHE*A.133.ASNGLY
3ch0A         A.241.TRP*A.218.PROASP
3mogA         A.470.GLUSER*A.439.GLN
3mogA         A.261.PROSER*C.254.TRP
3mogA            A.391.TRP*A.440.ARG
3mogA            A.283.TYR*A.289.ARG
3mogA           A.34.TYR*A.35.ASPILE
3mogA         A.229.GLYPRO*A.217.ASP
3mogA           A.67.GLU*A.67.GLUARG
3mogA         A.416.ASP*A.428.GLYPRO
3mogA           A.90.GLU*A.90.GLUALA
3mogA             A.5.VALGLN*A.6.GLN
3mogA            A.226.PHE*A.198.TYR
3mogA         A.234.THRASP*A.239.GLN
3mogA            A.265.GLN*A.203.TRP
3mogA         A.254.TRPGLN*A.255.GLN
3mogA         A.438.TRP*A.433.GLYALA
1wn2A           A.48.GLUALA*A.52.ARG
1wn2A           A.16.ASP*A.63.GLUSER
1wn2A              A.44.ARG*A.40.TYR
1wn2A           A.14.ARG*A.64.SERGLU
1agjA          A.17.TYR*A.188.GLYPHE
1agjA         A.172.ARG*A.172.ARGSER
1agjA              A.87.ARG*A.50.PHE
1agjA         A.152.ASP*A.178.THRTHR
1agjA          A.187.TYRGLY*A.17.TYR
1agjA         A.190.THRVAL*A.189.PHE
1agjA           A.49.VALPHE*A.48.ASN
1agjA              A.91.ASN*A.38.ARG
1agjA            A.182.ARG*A.185.ARG
1agjA         A.211.SERSER*A.210.HIS
1agjA              A.14.TRP*A.18.TYR
1agjA         A.224.ASNTYR*A.186.TYR
1agjA           A.44.ASN*A.40.LYSTYR
1agjA           A.78.ASN*A.76.PHEALA
1agjA       A.121.LEUALA*A.70.ASNARG
1agjA           A.50.PHE*A.51.VALLYS
1agjA          A.222.GLNILE*A.14.TRP
1axdA               A.48.ARG*A.6.TYR
1axdA         A.157.ALAGLY*A.160.PHE
1axdA              A.49.ASN*A.65.PHE
1axdA         A.102.GLU*A.102.GLUALA
1axdA         A.158.GLYASP*A.160.PHE
1axdA           A.49.ASN*A.51.PHEGLY
1axdA         A.155.TYR*A.160.PHELEU
1axdA          A.66.GLU*B.100.GLUVAL
1axdA             A.51.PHE*B.105.GLN
1axdA             A.105.GLN*B.51.PHE
1axdA              A.68.ARG*A.16.ARG
1axdA           A.48.ARG*A.44.GLUHIS
1axdA          A.100.GLUVAL*B.66.GLU
1axdA             A.160.PHE*A.84.ARG
1axdA         A.187.TYR*A.143.LEUGLU
3obyA         A.296.ARG*A.292.LEULEU
3obyA             A.72.PHE*A.296.ARG
3obyA              A.73.HIS*A.80.ARG
3obyA           A.39.PHEALA*A.62.ARG
3obyA            A.309.GLU*A.118.ARG
3obyA         A.306.ARGGLU*A.310.GLU
3obyA             A.6.GLU*A.6.GLUASN
3obyA         A.177.ALAALA*A.208.TYR
3obyA         A.300.ASPVAL*A.299.TRP
3obyA         A.339.ARG*A.282.ILEGLU
3obyA            A.322.PHE*A.321.GLU
3obyA            A.299.TRP*A.274.ARG
3obyA         A.139.GLYTYR*A.172.PHE
3obyA         A.333.GLYILE*A.291.PHE
3obyA            A.158.ARG*A.140.TYR
3obyA         A.302.ASPGLY*A.306.ARG
3obyA         A.224.GLYSER*A.228.PHE
3obyA            A.280.ARG*A.277.HIS
2xppA           A.87.ALATHR*A.77.ASP
2xppA          A.165.PHE*B.63.TYRARG
2xppA           A.61.GLU*A.57.GLYTHR
2xppA         A.148.LYSILE*A.150.HIS
2xrhA           A.17.PHE*A.18.THRMET
2xrhA           A.22.ASP*A.20.ALALYS
2xrhA           A.49.GLU*A.23.PHESER
2xrhA           A.36.GLYVAL*A.88.ARG
2xrhA              A.89.GLN*A.85.PHE
2xrhA           A.62.ARG*A.62.ARGLYS
1xkuA         A.145.ASN*A.143.GLYLEU
1xkuA          A.111.GLN*A.87.LYSILE
1xkuA            A.249.ASN*A.225.PHE
1xkuA         A.104.ARG*A.103.GLUARG
1xkuA         A.110.ASNGLN*A.131.ASN
1xkuA         A.306.GLNTYR*A.308.TRP
1xkuA         A.188.GLN*A.210.ALASER
1xkuA         A.200.ASPGLY*A.202.ASN
1xkuA         A.129.HIS*A.153.GLYTHR
2v4vA        A.992.ASPSER*A.1030.TYR
2v4vA        A.993.SERSER*A.1030.TYR
2v4vA         A.974.PHE*A.975.GLNALA
2v4vA       A.1031.LEUVAL*A.1033.PHE
2v4vA           A.927.ARG*A.1045.TRP
2v4vA        A.1013.TYRTHR*A.977.ARG
2v4vA     A.980.SERALA*A.1009.ASPTRP
2v4vA         A.933.TYR*A.931.GLUSER
2v4vA           A.1013.TYR*A.946.GLU
2v4vA           A.963.ASN*A.1028.ASP
2v4vA         A.936.GLN*A.936.GLNSER
2v4vA            A.953.PHE*A.940.GLN
2obnA         A.260.HIS*A.261.ARGALA
2obnA         A.179.ARGGLY*A.181.TRP
2obnA            A.295.PHE*A.249.ARG
2obnA            A.147.ARG*B.272.HIS
2obnA         A.255.GLN*A.254.THRGLN
2obnA               A.74.GLN*A.7.GLN
2obnA         A.130.TRP*A.131.ASPVAL
2obnA              A.70.GLU*A.71.TYR
2obnA         A.173.HIS*A.184.LYSPHE
2obnA               A.74.GLN*A.8.ARG
2obnA            A.272.HIS*B.147.ARG
2obnA           A.40.ILEASP*A.14.HIS
2obnA         A.229.HIS*A.172.LEUHIS
2obnA         A.270.ASNPRO*A.272.HIS
2obnA           A.58.TYR*A.59.VALPRO
2obnA            A.133.ARG*A.110.HIS
2obnA            A.203.ASP*B.208.ASP
2obnA         A.186.LEUALA*A.185.PHE
2obnA         A.224.ASNTYR*A.182.ARG
2obnA         A.170.LEUGLU*A.174.TRP
2obnA              A.42.ARG*A.14.HIS
3afiA           A.91.GLN*A.91.GLNARG
3afiA         A.207.ARG*A.202.PROTHR
3afiA         A.172.GLU*A.172.GLUALA
3afiA      A.249.GLYGLU*A.251.PROGLY
3afiA            A.174.ASN*A.207.ARG
3afiA            A.269.ARG*E.305.ARG
3afiA            A.121.ARG*A.305.ARG
3afiA           A.21.TYR*A.10.ARGARG
3afiA            A.269.ARG*E.307.GLN
3afiA         A.207.ARG*A.203.THRPRO
3afiA            A.104.TRP*A.213.PHE
3afiA            A.158.ARG*A.135.TRP
3afiA         A.139.HIS*A.149.HISALA
3afiA      A.296.GLYTRP*E.296.GLYTRP
3afiA           A.40.THRSER*A.36.HIS
3afiA         A.258.GLU*A.258.GLUPHE
3afiA             A.176.PHE*A.38.ASN
3afiA      A.300.GLYILE*E.300.GLYILE
3afiA           A.42.SERHIS*A.22.ARG
3afiA            A.128.PHE*A.263.PHE
3afiA          A.96.SERALA*A.119.PHE
3afiA         A.154.ARG*A.150.ALAGLU
3afiA          A.224.ALAASP*B.83.ARG
3afiA              A.46.ARG*A.43.HIS
4epcA         A.795.VALPRO*A.839.TRP
4epcA            A.750.TYR*A.766.GLN
4epcA         A.798.GLYTHR*A.793.HIS
4epcA      A.718.TYRTHR*A.720.THRVAL
4epcA         A.718.TYR*A.725.LYSGLY
4epcA            A.750.TYR*A.771.TYR
4epcA            A.709.GLN*A.797.TRP
4epcA         A.815.PHE*A.831.GLYTHR
4epcA         A.711.ASN*A.768.GLUVAL
4epcA         A.771.TYR*A.772.ASNTHR
1yt5A         A.146.PHE*A.144.METTRP
1yt5A         A.131.METVAL*A.147.PHE
1yt5A            A.32.GLYGLU*A.7.TYR
1yt5A         A.241.TYR*A.242.ASPTYR
1yt5A            A.135.GLU*A.145.TRP
1yt5A         A.238.PROPRO*A.240.GLU
1yt5A             A.96.TRP*C.140.HIS
1yt5A           A.98.PHE*A.96.TRPASN
1yt5A         A.220.LYSTHR*A.208.ASP
1yt5A            A.237.ARG*A.241.TYR
2jd3A           A.85.LYSPRO*A.84.TRP
2jd3A           A.17.GLU*A.15.HISPRO
2jd3A               A.13.TYR*B.7.ARG
3dasA         A.258.TRP*A.256.ALAGLN
3dasA           A.94.ASP*A.90.ASPTYR
3dasA           A.35.TRP*A.83.LEUGLY
3dasA        A.16.PROALA*A.18.LYSGLY
3dasA         A.339.ASP*A.325.THRSER
3dasA         A.147.PHEGLY*A.209.TRP
3dasA         A.221.GLYGLN*A.202.ARG
3dasA         A.292.GLYTHR*A.214.ARG
3dasA           A.95.HIS*A.93.SERASP
3dasA            A.304.GLU*A.284.ARG
3dasA         A.337.GLYASP*A.340.ARG
3dasA            A.225.TRP*A.257.GLN
3dasA      A.266.SERGLY*A.205.GLNGLY
3dasA            A.191.PHE*A.169.ARG
3dasA         A.199.TYRGLY*A.201.HIS
3dasA         A.270.TYR*A.273.GLYSER
3dasA             A.144.ARG*A.35.TRP
3dasA         A.159.GLU*A.162.ASPTHR
3dasA         A.114.TYR*A.115.ASPGLU
3dasA          A.18.LYSGLY*A.287.ARG
3dasA         A.318.GLYASP*A.272.GLU
3dasA         A.300.GLNALA*A.286.TRP
3dasA         A.107.ASNARG*A.106.ASP
4d10H          H.51.ASN*C.195.LEULYS
4d10H            H.118.PHE*H.153.TRP
4d10H           H.26.GLU*H.22.ASNGLN
4d10H          H.90.TYR*H.137.VALGLY
4d10H         H.115.ARG*H.111.ASPALA
4d10H              H.49.ASP*H.52.ASN
4d10H         H.195.GLNGLN*H.196.GLN
4d10H           H.97.GLN*H.96.HISGLN
4d10H         H.199.ARGLEU*H.203.TYR
4d10H              H.75.TRP*H.57.TRP
2xioA          A.38.ARG*A.252.HISCYS
2xioA             A.28.HIS*A.248.TRP
2xioA            A.151.ARG*A.177.ASP
2xioA         A.248.TRP*A.249.GLUSER
2xioA             A.131.TYR*A.84.PHE
2xioA         A.136.PHEGLU*A.167.ARG
2xioA         A.258.ASN*A.226.CYSGLY
2xioA           A.92.TYR*A.83.GLUPHE
2xioA            A.147.PHE*A.174.HIS
2xioA           A.38.ARG*A.34.ASPVAL
2xioA              A.70.PHE*A.67.ASN
1nhsA           A.76.ASN*A.34.GLYASP
1nhsA         A.366.PHE*A.364.METASP
1nhsA         A.375.PHE*A.434.ILEILE
1nhsA         A.190.ASPLYS*A.183.ARG
1nhsA           A.23.HISPRO*A.25.ASP
1nhsA        A.52.VALLYS*A.50.GLYLYS
1nhsA           A.83.GLN*A.82.ILEGLN
1nhsA       A.302.ALAARG*A.10.HISGLY
1nhsA           A.40.LEUCYS*A.39.PHE
1nhsA      A.432.TRPASN*A.430.LYSPRO
1nhsA         A.268.TYR*A.316.PROVAL
1nhsA            A.332.PHE*A.204.ASN
1nhsA          A.87.HISGLN*A.104.TYR
1nhsA              A.60.TYR*A.10.HIS
1nhsA         A.233.TYR*A.231.ASNALA
1nhsA         A.379.TYR*A.354.LYSALA
1nhsA         A.323.VALGLN*A.324.GLN
1nhsA            A.233.TYR*A.231.ASN
1nhsA              A.36.PHE*A.59.ARG
1nhsA              A.74.PHE*A.31.TYR
1nhsA         A.375.PHE*A.376.LYSLEU
1nhsA         A.424.PHE*A.425.GLNPRO
1nhsA       A.306.GLYARG*A.14.GLUALA
1nhsA         A.424.PHE*A.430.LYSPRO
2vwsA            A.232.ASN*A.207.ARG
2vwsA            A.7.ASNPRO*A.11.GLU
2vwsA         A.174.PHE*A.215.PHELEU
2vwsA            A.225.GLN*A.229.TRP
2vwsA      A.181.SERALA*A.186.TYRPRO
2vwsA         A.174.PHE*A.175.ILEGLY
2vwsA         A.102.ALAGLU*A.106.ARG
2vwsA      A.135.ILEGLU*A.133.GLYARG
2vwsA           A.36.ALATHR*A.67.TYR
2vwsA       A.128.ARGALA*A.89.ILEGLY
2vwsA        A.47.GLYGLU*A.75.PROVAL
2vwsA         A.233.PHE*A.213.ALAGLY
2vwsA          A.98.METVAL*A.100.ASP
2vwsA           A.60.GLN*A.27.THRTHR
2vwsA         A.216.LEUALA*A.215.PHE
2vwsA         A.197.ARG*A.193.PROGLU
2vwsA            A.143.ASN*A.113.ARG
2vwsA         A.127.ALAARG*A.132.TRP
2vwsA            A.128.ARG*A.131.ARG
2vwsA         A.174.PHE*A.214.GLYPHE
1h7sA            A.235.GLN*A.320.PHE
1h7sA         A.325.ILESER*A.324.ASN
1h7sA         A.321.VALVAL*A.320.PHE
1h7sA         A.310.TYR*A.318.TYRPRO
1h7sA            A.231.PHE*A.287.ARG
1h7sA         A.298.ASP*A.299.PROALA
1h7sA             A.126.HIS*A.76.GLU
1h7sA         A.233.GLNLYS*B.208.GLN
1h7sA         A.242.PHE*A.243.VALGLN
1h7sA         A.300.ALALYS*A.304.ARG
1h7sA         A.151.ARG*A.154.GLYTHR
1h7sA         A.317.GLN*A.281.GLYARG
1h7sA           A.76.GLUGLU*A.80.PHE
1h7sA         A.287.ARGGLN*A.289.PHE
1h7sA         A.352.LEUALA*A.255.TYR
1h7sA          A.72.GLYCYS*A.153.ARG
1h7sA            A.282.ARG*A.287.ARG
1h7sA      A.102.GLUTHR*A.100.GLNVAL
1isiA             A.163.GLU*A.79.ASN
1isiA          A.48.LYSASP*A.113.ARG
1isiA            A.231.TYR*A.193.TRP
1isiA         A.226.SERCYS*A.225.TYR
1isiA           A.125.CYSPRO*A.2.TRP
1isiA         A.169.PROILE*A.168.TYR
1uuyA          A.4.PROGLU*A.6.TYRLYS
4bxoA       A.1937.CYSGLN*A.1899.GLU
4bxoA        A.1923.THRTHR*B.135.GLU
4bxoA          A.2023.TYR*A.2027.HIS
4bxoA       A.1823.GLYGLY*A.1825.HIS
4bxoA       A.1859.ASN*A.1957.VALGLY
2e0zA      A.338.PROGLU*A.213.GLYILE
2e0zA         A.296.PHE*A.248.GLYLEU
2e0zA         A.223.ASP*A.221.SERTRP
2e0zA         A.162.TYR*C.142.GLNSER
2e0zA         A.182.GLYTHR*A.184.TYR
1rypK             K.72.TYR*C.143.ARG
1rypK           K.64.GLNLEU*D.94.GLN
1rypK           K.33.LYSTHR*K.45.PHE
1rypK         K.106.TYR*K.112.LYSPRO
1rypK         K.143.LEUASP*K.129.TYR
1rypK              K.54.GLN*L.88.TYR
1rypK         K.106.TYR*K.184.ASPLYS
1rypK         K.147.TYR*K.148.ARGPRO
1rypK            K.140.PHE*Z.167.ARG
1rypK         K.106.TYR*K.111.ASNLYS
1rypK           K.77.GLN*K.77.GLNALA
1rypK           K.84.ARG*K.84.ARGGLN
1rypK           K.70.GLU*K.69.ARGGLU
1rypK         K.148.ARG*Z.205.GLYSER
1rypK           K.32.ASPLYS*K.31.ASP
2dy1A         A.466.GLYGLN*A.484.TRP
2dy1A      A.327.HISLEU*A.325.LEUPRO
2dy1A         A.494.GLYPHE*A.493.TYR
2dy1A         A.357.HIS*A.355.GLYLEU
2dy1A         A.329.TYR*A.327.HISLEU
2dy1A             A.17.HIS*A.112.GLN
2dy1A      A.520.ALALYS*A.522.LYSGLY
2dy1A            A.552.PHE*A.508.TYR
2dy1A         A.495.PHE*A.496.GLUTRP
2dy1A            A.467.GLN*A.484.TRP
2dy1A         A.586.ARG*A.632.LEUTHR
2dy1A      A.556.ALASER*A.515.GLYILE
2dy1A            A.143.TYR*A.200.ARG
2dy1A         A.508.TYR*A.548.SERASP
2dy1A          A.10.ARG*A.273.PROSER
2dy1A       A.16.GLYHIS*A.114.GLYTHR
2dy1A         A.403.ARG*A.403.ARGLYS
2dy1A         A.317.GLNSER*A.363.TRP
2dy1A         A.480.TYR*A.481.GLYASP
2dy1A         A.447.VALGLU*A.448.GLU
2dy1A            A.495.PHE*A.513.GLU
2dy1A         A.642.GLUPHE*A.576.TYR
2dy1A            A.457.ARG*A.646.TYR
2dy1A         A.560.PHE*A.519.ALAALA
2dy1A         A.375.PHE*A.376.ALAARG
2dy1A         A.643.PHE*A.644.SERHIS
2dy1A      A.502.GLYVAL*A.504.ILEPRO
2dy1A         A.417.GLN*A.417.GLNGLU
2dy1A              A.90.GLU*A.63.ARG
2dy1A            A.661.ARG*A.528.PHE
2dy1A         A.573.GLUPRO*A.646.TYR
2dy1A         A.484.TRPLEU*A.538.TYR
1jmvA         A.136.VALPRO*A.110.HIS
1jmvA           A.38.VALASP*A.37.HIS
1jmvA           A.28.ARG*A.24.GLYILE
1jmvA              A.46.TYR*A.92.GLN
1jmvA             A.82.GLU*A.101.TYR
1jmvA           A.99.GLU*A.99.GLUGLN
1jmvA         A.111.HISGLN*A.113.ASP
3cjhB           B.71.ARG*B.70.ASNARG
3cjhB           B.34.GLNMET*B.38.HIS
3u62A            A.32.TYR*A.4.CYSILE
3u62A         A.228.GLN*A.228.GLNALA
3u62A         A.153.LYSILE*A.155.PHE
3u62A             A.1.METLYS*A.3.PHE
3u62A         A.117.GLYGLY*A.121.ARG
3u62A           A.64.GLU*A.64.GLUARG
3u62A              A.32.TYR*A.19.TYR
3u62A          A.7.GLYTYR*A.9.PROVAL
3u62A         A.240.ASPGLU*A.239.TYR
3u62A            A.32.TYR*A.3.PHECYS
3u62A            A.244.PHE*A.248.PHE
3u62A         A.100.LYSSER*A.227.TYR
3u62A              A.3.PHE*A.236.TRP
3u62A         A.143.GLU*A.143.GLUARG
3u62A              A.94.ASP*A.83.ASN
3e7nA        A.49.PROSER*A.47.GLYVAL
3e7nA           A.98.THRILE*A.97.ASN
3e7nA          A.128.TYR*A.72.GLUILE
3e7nA           A.17.ARG*A.13.SERVAL
3e7nA             A.117.GLN*A.22.ASP
3e7nA         A.128.TYRALA*A.130.ASN
2gcgA            A.253.ASP*A.250.ASN
2gcgA         A.162.GLYARG*A.166.GLN
2gcgA         A.142.LYSPRO*A.141.TRP
2gcgA           A.38.GLUPRO*A.13.ARG
2gcgA              A.74.ASN*A.53.HIS
2gcgA         A.199.PHE*A.186.GLNPRO
2gcgA         A.302.ARG*A.296.SERALA
2gcgA           A.48.GLYVAL*A.10.PHE
2gcgA         A.240.PHE*A.241.ILEASN
2gcgA           A.10.PHE*A.11.VALTHR
2gcgA      A.271.THRSER*A.273.PROGLU
2gcgA            A.194.GLU*A.195.PHE
3l4jA         A.769.THRARG*A.752.PHE
3l4jA         A.822.LEUPRO*A.997.PHE
3l4jA            A.601.TYR*A.735.HIS
3l4jA            A.902.GLU*A.872.TRP
3l4jA         A.872.TRP*A.874.GLYTHR
3l4jA         A.773.GLYGLY*A.752.PHE
3l4jA         A.543.GLU*A.543.GLUSER
3l4jA         A.682.LEUPHE*A.529.HIS
3l4jA         A.587.TRP*A.591.GLUSER
3l4jA            A.683.PHE*A.533.HIS
3l4jA         A.561.THRPRO*A.579.TYR
3l4jA         A.441.TYR*A.439.GLUGLY
3l4jA            A.792.ARG*A.711.PHE
3l4jA      A.795.PHEHIS*A.793.LYSILE
3l4jA         A.703.GLNARG*A.699.PHE
3l4jA         A.908.TRP*A.906.ARGTHR
3l4jA         A.955.THRARG*A.960.PHE
3l4jA         A.813.VALGLU*A.708.TYR
3l4jA          A.1053.GLU*A.1050.GLN
3l4jA         A.583.ASPTYR*A.578.PHE
3l4jA         A.908.TRP*A.772.THRGLY
3l4jA         A.870.ARG*A.870.ARGGLY
3l4jA         A.799.ASPASP*A.803.TYR
3l4jA         A.642.PHE*A.536.GLYLEU
3l4jA       A.1122.TRPSER*A.1128.ARG
3l4jA          A.1005.TYR*A.1001.ARG
3l4jA           A.796.HIS*A.1008.ARG
3l4jA       A.1135.GLNLYS*A.1023.TYR
3l4jA            A.868.TRP*A.845.ASN
3l4jA       A.1058.PROARG*A.1113.TYR
3l4jA         A.840.TYR*A.841.ILEPRO
3l4jA         A.868.TRP*A.869.PHEARG
3l4jA         A.764.ASN*A.762.LEUPRO
3l4jA          A.1014.GLU*A.1018.TRP
3l4jA         A.657.TYR*A.658.GLUPRO
4kw2A         A.248.GLU*A.248.GLUTYR
4kw2A         A.111.GLUTRP*A.106.TYR
4kw2A         A.241.PHE*A.243.GLYLEU
4kw2A         A.116.PHEALA*A.146.TYR
4kw2A             A.33.GLN*A.209.HIS
4kw2A           A.41.THRLEU*A.63.GLN
4kw2A      A.221.THRTRP*A.219.ASPALA
4kw2A            A.264.GLU*A.265.PHE
4kw2A            A.138.TYR*A.109.ASN
4kw2A          A.114.LYSPHE*A.77.TYR
4kw2A              A.38.HIS*A.35.TRP
1w8sA         A.231.GLYARG*A.235.TRP
1w8sA             A.252.TYR*A.15.ARG
1w8sA         A.182.GLYASP*A.180.TYR
1w8sA         A.144.GLUSER*A.146.PHE
1w8sA              A.14.ARG*A.15.ARG
1w8sA                A.6.GLU*A.3.ASN
1w8sA             A.80.ASN*A.111.TYR
1w8sA         A.121.TRP*A.119.PHEGLU
1w8sA         A.232.ARG*A.204.GLYPRO
1w8sA            A.233.ASN*A.213.PHE
1w8sA          A.163.TYR*E.29.HISGLY
1w8sA            A.243.PHE*A.210.GLU
1w8sA      A.116.GLYSER*A.149.GLYGLY
1w8sA           A.40.SERALA*A.34.PHE
1w8sA          A.29.HISGLY*B.163.TYR
3qw9A         A.143.LEUPRO*A.162.TRP
3qw9A              A.73.ARG*A.68.TYR
3qw9A           A.44.TYR*A.42.HISVAL
3qw9A           A.22.TYR*A.27.PHELEU
3qw9A        A.32.PROGLY*A.34.VALPHE
3qw9A           A.48.SERVAL*A.58.PHE
3qw9A           A.44.TYR*A.24.THRASP
3qw9A          A.106.GLU*A.51.LYSALA
3qw9A         A.116.PHE*A.117.LYSSER
3qw9A          A.126.PHE*A.68.TYRSER
3qw9A             A.136.ARG*A.97.ARG
3ioxA         A.570.SERMET*A.527.PHE
3ioxA         A.676.PHE*A.781.ASNTYR
3ioxA         A.671.PHE*A.787.ALATHR
3ioxA         A.817.TYRSER*A.816.TRP
3ioxA         A.498.ASPGLY*A.768.TRP
3ioxA         A.850.TYR*A.848.PROTHR
3ioxA         A.644.TRP*A.645.LEUGLY
3ioxA            A.740.GLN*A.754.GLN
3ioxA            A.619.ASN*A.618.TYR
3ioxA         A.650.ASP*A.514.GLUPRO
3ioxA         A.657.ALASER*A.656.PHE
3ioxA         A.441.ARG*A.437.ALAILE
3ioxA         A.574.TYR*A.533.VALASP
3ioxA         A.656.PHE*A.815.ILETRP
3ioxA         A.725.GLU*A.725.GLULYS
3ioxA      A.650.ASPPRO*A.648.PHETHR
3ioxA            A.747.TRP*A.746.ARG
3ioxA         A.778.GLYPRO*A.687.ASN
3ioxA            A.630.TYR*A.628.TYR
3ioxA      A.503.GLUPRO*A.501.LEUTHR
3ioxA         A.537.PHESER*A.546.TYR
3ioxA      A.580.LYSALA*A.576.ASNPHE
3ioxA         A.716.VALLYS*A.715.PHE
3ioxA         A.812.LYSPRO*A.814.ASN
3ioxA         A.608.ALATHR*A.610.TYR
3ioxA         A.456.TYR*A.843.THRALA
3ioxA         A.701.GLU*A.700.ARGGLU
3ioxA         A.565.ASN*A.563.GLNSER
3ioxA         A.399.TYR*A.870.THRPRO
3ioxA         A.557.ASP*A.661.THRGLY
3ioxA         A.405.ARG*A.405.ARGVAL
3ioxA         A.660.TYR*A.662.GLYGLN
3ioxA            A.602.ARG*A.638.PHE
3ioxA         A.766.ASNSER*A.768.TRP
3ioxA            A.703.ASN*A.702.HIS
2bwjA         A.154.GLUALA*A.158.ARG
2bwjA          A.156.TYR*A.18.GLYGLY
2bwjA           A.66.ARG*A.62.ASPILE
2bwjA          A.152.ARG*B.58.LYSLEU
2bwjA          A.155.ALATYR*B.66.ARG
2bwjA         A.157.TYR*F.140.LEUPRO
2bwjA         A.140.LEUPRO*E.157.TYR
2bwjA           A.47.ARG*A.47.ARGGLU
2bwjA           A.35.TYRGLY*A.37.PHE
3ct9A         A.136.GLU*A.136.GLUGLU
3ct9A          A.11.GLUALA*A.114.GLN
3ct9A         A.130.TYR*A.131.LEUALA
3ct9A           A.49.ARG*A.33.ALAASP
3ct9A             A.127.ASN*A.61.PHE
3ct9A            A.195.ASN*A.198.TYR
3ct9A          A.75.ASP*A.134.CYSGLU
3ct9A             A.73.HIS*A.136.GLU
3ct9A            A.333.TYR*A.326.ARG
3ct9A         A.135.GLU*A.142.GLUGLY
3ct9A           A.48.GLYARG*A.55.TRP
3ct9A            A.210.TYR*A.206.TRP
3ct9A         A.211.ARGPHE*A.210.TYR
3ct9A           A.29.GLUTHR*A.52.ASN
3ct9A         A.309.GLN*A.317.VALLYS
1vh4A      A.223.PROLEU*A.250.GLYALA
1vh4A            A.329.GLN*A.298.ARG
1vh4A         A.256.ASNTHR*A.255.HIS
1vh4A         A.216.ILELYS*A.215.HIS
1vh4A         A.189.PHEVAL*A.188.HIS
1vh4A         A.291.ASN*A.289.GLUHIS
1vh4A            A.332.ASN*A.313.PHE
1vh4A         A.212.HIS*A.210.ASNALA
1vh4A         A.354.ASP*B.338.GLYLYS
1vh4A         A.244.HIS*A.242.PHESER
1vh4A             A.344.ASP*A.51.TYR
1vh4A           A.44.ARG*A.52.THRPRO
1vh4A           A.94.VALPRO*A.93.TYR
1vh4A          A.28.GLN*A.114.ARGGLN
1vh4A            A.156.HIS*A.189.PHE
1vh4A         A.361.GLYALA*A.360.HIS
1vh4A         A.135.GLNSER*A.112.ASP
1vh4A          A.128.HIS*A.35.GLNLEU
1vh4A             A.49.TRP*A.254.ARG
1vh4A         A.313.PHE*A.314.ASNGLY
1vh4A            A.254.ARG*A.285.ARG
1vh4A            A.374.TYR*A.378.ARG
1vh4A           A.14.TRP*A.10.ALALEU
1vh4A         A.220.PHE*A.218.LEUALA
1vh4A         A.174.HIS*A.175.LEUASP
1vh4A            A.126.PHE*A.228.PHE
1vh4A         A.352.TYR*A.350.GLUILE
1vh4A         A.338.GLYLYS*B.354.ASP
1vh4A         A.262.ASN*A.260.GLNLEU
3ai3A           A.98.ASNGLU*A.99.GLU
3ai3A           A.28.ALALYS*A.55.PHE
3ai3A            A.239.PHE*E.239.PHE
3ai3A          A.134.ARG*A.85.GLYALA
3ai3A         A.247.TYR*E.256.ASPGLY
3ai3A         A.256.ASP*A.254.PHEVAL
3ai3A         A.244.ARG*A.243.GLUARG
3ai3A            A.154.GLU*A.157.TYR
3ai3A         A.256.ASPGLY*E.247.TYR
3ai3A            A.113.TRP*C.113.TRP
3ai3A         A.253.TYR*A.251.SERALA
3ai3A         A.154.GLUPRO*A.158.ASN
2pmiB         B.218.ASPLYS*B.222.ARG
2pmiB         B.156.ASN*B.152.CYSHIS
2pmiB         B.213.GLYTYR*B.174.ASP
2pmiB            B.206.TYR*B.173.ARG
2pmiB      B.189.PHEVAL*B.191.ILEASP
2pmiB         B.113.THRLEU*B.112.PHE
2pmiB          B.141.ASN*A.44.GLUGLY
2pmiB            B.109.TYR*B.165.ARG
3go2A            A.217.ASP*A.243.GLU
3go2A            A.370.ARG*A.356.HIS
3go2A      A.176.ARGPRO*A.181.VALPRO
3go2A            A.219.ASN*A.217.ASP
3go2A             A.298.GLN*A.67.PHE
3go2A           A.65.ARG*A.65.ARGPHE
3go2A         A.188.ASN*A.186.ALALEU
3go2A            A.267.GLU*A.316.HIS
3go2A         A.256.ARG*A.284.VALASP
3go2A            A.258.HIS*A.254.TYR
3go2A           A.35.PHE*A.19.HISPHE
3go2A         A.232.ARG*A.228.LEULYS
3go2A      A.149.ALAGLU*A.207.GLYALA
3go2A            A.293.TRP*A.290.ASP
3go2A           A.20.PHE*A.18.TYRHIS
3go2A            A.127.TRP*A.123.HIS
3go2A            A.338.ARG*A.240.PHE
3go2A         A.220.PHE*A.245.ASPSER
3go2A            A.127.TRP*A.135.PHE
3go2A          A.134.PHE*A.14.GLYTRP
3go2A            A.385.HIS*A.349.TRP
3go2A             A.84.GLU*A.293.TRP
3go2A             A.131.HIS*A.15.TRP
4nimA           A.21.ALAALA*A.25.ARG
4nimA         A.127.ALAILE*A.131.PHE
4nimA           A.62.VALGLN*A.61.PHE
4nimA       A.154.PHEILE*A.99.GLYTHR
4nimA         A.261.GLYSER*A.259.TYR
4nimA            A.113.PHE*A.109.PHE
4nimA      A.145.SERMET*A.187.ASNILE
4nimA         A.253.GLNSER*A.252.ASP
4nimA              A.71.ASP*A.68.ASN
4nimA            A.253.GLN*A.220.PHE
2b5gA           A.46.PHE*A.10.THRALA
2b5gA         A.157.PHELYS*B.127.PHE
2b5gA         A.142.ARG*A.138.ASNPHE
2b5gA            A.143.ARG*A.139.PHE
2b5gA         A.157.PHE*B.146.SERASP
2b5gA           A.81.TYR*A.86.GLYLYS
2b5gA           A.62.GLU*A.60.PROLYS
2b5gA           A.90.TYR*A.91.LEUGLU
2b5gA         A.131.GLU*A.131.GLUTRP
2b5gA              A.52.TYR*B.81.TYR
2b5gA           A.67.GLUGLY*A.69.HIS
2b5gA         A.146.SERASP*B.157.PHE
2b5gA            A.163.TYR*A.162.GLU
2b5gA         A.154.TRP*A.152.GLUGLY
2b5gA           A.23.GLULEU*A.95.PHE
2b5gA         A.127.PHE*B.157.PHELYS
2b5gA           A.77.TYR*A.53.HISCYS
2b5gA          A.90.TYR*A.126.HISPHE
2uvoA              A.21.TYR*A.20.GLN
2uvoA         A.145.TYR*A.143.ASNASN
2uvoA         A.116.PHE*A.111.GLYLEU
2uvoA         A.160.CYSGLY*A.170.ASP
2uvoA          A.92.GLN*A.107.TRPGLY
2uvoA           A.49.GLN*A.64.TYRGLY
2uvoA           A.30.TYR*A.24.CYSGLY
2uvoA              A.45.ARG*A.66.TYR
2uvoA         A.153.CYSGLY*A.159.TYR
2uvoA            A.6.GLN*A.21.TYRGLY
2uvoA           A.73.TYR*A.67.CYSGLY
2uvoA           A.41.TRP*A.31.CYSGLY
2uvoA           A.30.TYR*A.25.GLYMET
2uvoA               A.2.ARG*A.23.TYR
2uvoA         A.116.PHE*A.110.CYSGLY
2uvoA        A.40.CYSTRP*A.42.THRSER
2uvoA            A.107.TRP*A.106.GLN
2uvoA              A.57.ASN*A.11.GLU
2uvoA         A.154.GLYILE*A.159.TYR
3qu5A             A.123.ARG*A.88.GLU
3qu5A              A.91.ARG*B.90.GLU
3qu5A              A.83.PHE*A.23.HIS
3qu5A              A.40.ARG*A.28.HIS
3qu5A              A.90.GLU*B.91.ARG
3qu5A             A.96.TRP*A.100.GLN
3qu5A          A.172.ASN*A.14.GLYVAL
3qu5A              A.90.GLU*B.90.GLU
4b43A         A.332.ALALYS*A.285.TYR
4b43A         A.253.GLU*A.252.LEUGLU
4b43A         A.247.PROARG*A.273.PHE
4b43A         A.315.GLU*A.283.GLUALA
4b43A           A.65.ARG*A.61.ALAGLU
4b43A            A.239.TYR*A.145.ASP
4b43A           A.47.ARG*A.43.ALAGLU
4b43A         A.326.VALPRO*A.325.TRP
4b43A            A.205.GLU*A.206.TYR
4b43A         A.118.PROGLN*A.119.GLN
4b43A         A.265.ASN*A.110.VALGLY
4b43A             A.160.GLN*A.81.HIS
4b43A       A.160.GLNTHR*A.80.GLYHIS
4b43A           A.94.ARG*A.90.LEUASP
4b43A         A.328.ASPLEU*A.278.TYR
4b43A             A.72.ARG*A.239.TYR
4ly1A            A.346.PHE*A.339.PHE
4ly1A         A.231.PHEPRO*A.204.HIS
4ly1A              A.44.HIS*A.20.TYR
4ly1A           A.30.GLYGLN*A.28.TYR
4ly1A            A.317.TRP*A.140.TRP
4ly1A         A.214.GLYASP*A.206.TYR
4ly1A      A.195.THRASP*A.223.LYSGLY
4ly1A      A.198.VALMET*A.196.ASPARG
4ly1A          A.77.TYR*A.150.SERGLU
4ly1A      A.103.GLUASP*A.105.CYSPRO
4ly1A            A.265.GLN*A.179.ASP
4ly1A            A.376.ARG*C.151.GLU
4ly1A      A.266.CYSGLY*A.304.GLYGLY
4ly1A          A.124.ALAGLY*A.19.TYR
4ly1A         A.234.ARG*B.337.ASPTYR
4ly1A         A.346.PHE*A.342.PHEGLY
4ly1A           A.53.TYR*A.51.GLYLEU
4ly1A             A.29.TYR*A.108.PHE
4ly1A         A.193.TYR*A.220.GLYALA
4ly1A         A.185.GLYASP*A.184.HIS
4ly1A           A.21.ASPGLY*A.20.TYR
4ly1A          A.77.TYR*A.151.GLUALA
4ly1A           A.18.TYR*A.19.TYRTYR
4ly1A         A.121.GLYSER*A.139.ASN
4ly1A         A.178.ILEASP*A.177.TYR
4ly1A         A.213.THRGLY*A.184.HIS
4ly1A           A.41.ARG*A.25.GLYASN
4oydB            B.104.ARG*B.108.ARG
4oydB              B.84.GLN*B.81.ASN
4oydB              B.81.ASN*B.83.GLN
4oydB             B.108.ARG*C.92.HIS
2wnhA           A.72.GLYGLN*A.76.ARG
2wnhA           A.99.GLN*A.99.GLNARG
2wnhA         A.161.ARG*A.187.THRPRO
2wnhA              A.48.GLU*A.35.ARG
2wnhA         A.341.GLNALA*A.340.PHE
2wnhA            A.340.PHE*A.305.TRP
2wnhA           A.61.TYR*B.58.GLYHIS
2wnhA         A.366.ARGGLN*A.365.TRP
2wnhA         A.306.GLN*A.306.GLNLEU
2wnhA         A.325.ARG*A.275.LYSPRO
2wnhA             A.44.ARG*A.229.TRP
2wnhA            A.357.GLN*A.355.ASP
2wnhA           A.92.TYR*A.93.VALARG
2wnhA       A.68.GLYARG*A.111.GLYALA
2wnhA         A.136.PHEALA*A.140.GLN
2wnhA            A.358.HIS*A.352.GLN
2wnhA            A.391.ARG*A.302.ASN
2wnhA          A.220.GLUASN*A.59.HIS
2wnhA           A.58.GLYHIS*B.61.TYR
2wnhA         A.234.GLNALA*A.218.TRP
2wnhA            A.349.ARG*A.218.TRP
4xkzA            A.706.TRP*A.633.HIS
4xkzA         A.803.METLEU*A.807.ARG
4xkzA         A.794.GLYASP*A.835.ARG
4xkzA         A.835.ARGLEU*A.798.TRP
4xkzA         A.761.TRP*A.774.THRLEU
4xkzA            A.632.HIS*A.699.GLN
4xkzA         A.633.HISHIS*A.632.HIS
4xkzA         A.759.GLU*A.759.GLUILE
4xkzA         A.743.GLU*A.743.GLUTHR
4xkzA         A.733.GLYTHR*A.671.ASP
3r4rA           A.70.HIS*A.71.VALALA
3r4rA              A.80.ARG*A.83.PHE
3r4rA         A.287.ASNTYR*A.289.TYR
3r4rA           A.72.ALAVAL*A.74.PHE
3r4rA           A.83.PHELYS*A.82.TYR
3r4rA         A.239.SERASP*A.238.PHE
1nvtA           A.43.TYR*A.15.GLYLEU
1nvtA           A.43.TYR*A.26.SERPRO
1nvtA         A.259.GLN*A.259.GLNGLY
1nvtA         A.172.GLU*A.172.GLULYS
1nvtA              A.55.TYR*B.58.ASP
1nvtA           A.43.TYR*A.14.ILEGLY
1nvtA      A.231.TYRASN*A.233.PROLEU
1nvtA         A.258.TYR*A.117.METALA
1nvtA          A.91.LEUILE*A.145.PHE
1nvtA         A.267.TRP*A.263.ALAPHE
1nvtA      A.215.VALLYS*A.213.PROILE
1nvtA           A.81.TYR*A.53.LEULYS
1nvtA          A.4.GLYSER*B.4.GLYSER
1nvtA      A.157.ASNARG*A.159.THRVAL
1nvtA              A.43.TYR*A.30.HIS
1nvtA             A.96.ASN*A.109.ASN
4rcmA      A.146.PROPRO*A.148.TRPLEU
4rcmA         A.234.GLU*A.228.THRSER
4rcmA         A.241.PHE*A.177.TRPSER
4rcmA         A.178.SERSER*A.177.TRP
4rcmA         A.191.TYR*A.220.SERASP
4rcmA         A.157.PHE*A.283.GLYILE
4oijA           A.28.TYR*A.67.ARGHIS
4oijA           A.13.PHE*A.11.CYSCYS
4oijA           A.60.GLN*A.55.THRVAL
4l05A           A.76.PROGLY*A.78.ASN
4l05A      A.136.ASPLYS*A.139.GLUPRO
4l05A              A.48.HIS*A.73.HIS
4l05A           A.48.HIS*A.46.GLYPHE
4l05A             A.134.TYR*A.96.ARG
4l05A          A.141.LEUGLY*A.82.HIS
4l05A           A.90.HIS*A.81.HISHIS
4iiyA         A.332.ASN*A.330.ASNLYS
4iiyA         A.280.ASPCYS*A.279.PHE
4iiyA          A.61.PHE*B.283.GLYSER
4iiyA           A.79.TYR*A.75.ASNGLU
4iiyA            A.235.ARG*A.213.ARG
4iiyA          A.92.GLYASP*A.119.ASP
4iiyA          A.249.ILEALA*B.62.TYR
4iiyA        A.64.SERGLY*A.59.THRASP
4iiyA             A.38.ARG*A.148.HIS
4iiyA          A.283.GLYSER*B.61.PHE
4iiyA         A.244.ASPSER*A.276.HIS
4iiyA          A.35.ARG*A.146.GLYGLU
4iiyA            A.313.HIS*A.147.GLU
4iiyA             A.253.GLU*B.94.ASN
4iiyA         A.243.GLU*A.243.GLUASP
4iiyA         A.172.THRTYR*A.171.TYR
4iiyA           A.21.PHE*A.51.VALSER
4iiyA            A.289.TYR*A.205.TYR
4iiyA             A.94.ASN*B.253.GLU
4iiyA         A.331.LYSASN*A.204.PHE
4iiyA            A.229.GLU*A.230.TRP
4iiyA          A.62.TYR*B.249.ILEALA
3cssA         A.190.PHEPRO*A.173.PHE
3cssA         A.122.GLYLEU*A.200.TRP
3cssA         A.189.SERPHE*A.200.TRP
3cssA              A.97.ARG*A.57.HIS
3cssA          A.75.ASP*A.170.ALASER
3cssA            A.168.HIS*A.173.PHE
3cssA            A.250.ARG*A.211.TYR
3cssA              A.88.PHE*A.81.GLU
3cssA         A.190.PHE*A.198.LYSVAL
3cssA      A.260.GLYALA*A.221.GLYLYS
4m64A         A.341.PHE*A.302.ALASER
4m64A             A.16.PHE*A.151.PHE
4m64A            A.341.PHE*A.299.TRP
4m64A          A.13.PHE*A.192.ALASER
4m64A         A.346.VALILE*A.369.TYR
4m64A      A.227.ILETYR*A.225.GLYLEU
4m64A            A.268.PHE*A.258.PHE
4m64A          A.125.ILEPRO*A.79.TRP
4m64A             A.179.PHE*A.28.TYR
4m64A             A.127.PHE*A.11.TYR
4m64A         A.172.GLYALA*A.174.ASP
4kuiA         A.169.ARGASP*A.171.PHE
4kuiA         A.147.ILEALA*A.146.PHE
4kuiA            A.114.HIS*A.118.PHE
4kuiA         A.148.ALAVAL*A.146.PHE
4kuiA              A.92.ARG*A.66.TYR
4kuiA         A.114.HIS*A.112.GLUASP
4kuiA            A.195.ARG*A.207.TYR
4kuiA          A.145.ASPPHE*A.58.PHE
4kuiA             A.86.TRP*A.140.GLU
4kuiA            A.105.PHE*A.104.GLN
4kuiA           A.60.ASPASN*A.59.ASN
3tr3A              A.10.TRP*A.58.HIS
3tr3A        A.63.ILEHIS*A.61.SERASP
1go3F           F.44.PHE*E.86.GLUGLY
1go3F          F.40.TYR*E.101.LEUGLY
1go3F              F.79.ASP*F.82.ASP
1go3F             F.88.TYR*E.145.ARG
1go3F              F.26.GLN*F.22.TYR
1go3F             F.44.PHE*E.141.TYR
1go3F              F.44.PHE*F.40.TYR
1go3F       F.36.CYSALA*E.102.GLYPRO
4hplA        A.1642.SERGLU*B.189.ASN
4hplA           A.1641.PHE*B.210.ARG
4hplA        A.1644.THRPRO*B.191.TYR
4hplA           A.1637.PHE*B.202.HIS
3vl9A            A.9.PHE*A.15.THRALA
3vl9A           A.44.TYR*A.18.ALAGLY
3vl9A           A.35.GLYSER*A.57.TRP
3vl9A              A.12.GLN*A.13.TRP
3vl9A           A.46.GLYASP*A.20.ASP
3vl9A             A.69.ASN*A.201.GLU
3vl9A         A.218.GLU*A.218.GLUTYR
3vl9A         A.196.TYR*A.111.THRALA
3vl9A           A.36.SERGLN*A.57.TRP
3vl9A            A.107.PHE*A.119.GLU
3vl9A         A.220.SERILE*A.219.TYR
3vl9A         A.219.TYRSER*A.218.GLU
3vl9A              A.30.GLU*A.12.GLN
3vl9A           A.40.GLYVAL*A.52.HIS
3vl9A         A.174.PHE*A.175.SERGLY
3vl9A            A.9.PHE*A.14.ASPTHR
3gveA          A.71.TYR*A.331.ASNTHR
3gveA         A.292.GLULYS*A.298.TRP
3gveA         A.154.ASNGLY*A.156.ASN
3gveA         A.171.GLNILE*A.175.TRP
3gveA         A.191.GLUSER*A.187.GLN
3gveA            A.227.ASN*A.247.GLN
3gveA         A.230.PHE*A.219.GLNALA
3gveA            A.256.TYR*A.255.GLU
3gveA             A.123.ASP*A.94.ASN
3gveA         A.230.PHE*A.218.LYSGLN
3gveA           A.30.LYSGLU*A.24.TYR
3gveA        A.83.GLYTHR*A.85.LYSTHR
3gveA           A.64.GLN*A.64.GLNGLY
3gveA              A.71.TYR*A.75.TYR
3gveA         A.219.GLN*A.218.LYSGLN
3gveA           A.25.ASPTYR*A.24.TYR
3gveA          A.42.GLN*A.317.ARGASN
4bfoA           A.22.SERGLY*A.72.PHE
4bfoA           A.47.TRP*A.40.TYRALA
4bfoA        A.42.ASPGLY*A.78.GLYILE
4bfoA           A.16.TYR*A.18.GLYSER
4bfoA           A.23.GLYLYS*A.72.PHE
4bfoA           A.70.TRP*A.57.SERPHE
4bfoA          A.102.TYRGLN*A.82.PHE
4bfoA           A.58.PHE*A.59.SERGLY
4bfoA            A.2.SERILE*A.26.TYR
4bfoA           A.40.TYR*A.52.ASNILE
4bfoA           A.60.GLYPRO*A.58.PHE
4bfoA             A.102.TYR*A.97.ASN
3fzyA          A.3612.HIS*A.3622.GLN
3fzyA         A.-4.PHEGLN*A.3620.TRP
3fzyA       A.3595.ASPVAL*A.3562.HIS
3fzyA          A.3437.GLN*B.3437.GLN
3fzyA       A.3458.PHE*A.3512.LEUARG
3fzyA          A.3633.TRP*A.3593.ARG
3fzyA       A.3563.ILESER*A.3562.HIS
3fzyA              A.-1.ASN*A.-5.TYR
3fzyA       A.3467.GLUASN*A.3442.TRP
3fzyA       A.3528.ASN*A.3520.GLYARG
3fzyA       A.3581.HIS*A.3576.GLNLYS
3fzyA       A.3613.THRLYS*A.3620.TRP
3fzyA            A.3612.HIS*A.-4.PHE
4f9zA            A.211.PHE*C.180.HIS
4f9zA      A.144.VALTHR*A.142.HISMET
4f9zA         A.125.GLU*A.121.ASPGLU
4f9zA         A.177.GLUASN*A.181.ARG
4f9zA           A.64.PHE*A.62.GLYPHE
4f9zA           A.78.METVAL*A.87.PHE
4p6zG         G.128.CYSMET*G.163.HIS
4p6zG            G.395.GLU*G.396.PHE
4p6zG           G.63.ALAHIS*G.65.PHE
4p6zG         G.117.PHE*S.137.GLNALA
4p6zG              G.38.PHE*G.69.GLU
4p6zG             G.83.ARG*S.112.PHE
4p6zG         G.370.PHE*G.403.GLYILE
4p6zG            G.188.HIS*G.235.HIS
4p6zG         G.181.ASN*G.180.LYSASN
4p6zG      G.254.ARGILE*G.256.LEUGLY
4p6zG          G.251.ARG*S.74.GLNASP
4p6zG         G.183.LEUASN*G.218.GLN
4p6zG            G.452.HIS*G.483.TYR
4p6zG         G.575.HIS*G.573.TYRASP
4p6zG         G.232.SERPRO*G.231.TYR
4p6zG          G.121.LEUALA*G.86.TYR
4p6zG           G.31.CYSALA*G.35.ARG
4p6zG       G.28.GLNLYS*M.336.PROGLU
4p6zG            G.536.ARG*G.582.GLU
4p6zG          G.326.TYR*S.49.PHELEU
4p6zG            G.116.GLN*G.117.PHE
4p6zG         G.374.ASNGLY*G.411.TYR
4p6zG         G.562.ARGALA*G.566.TYR
4p6zG         G.307.VALLEU*G.311.ASN
4p6zG          G.83.ARG*S.138.ALAASP
4p6zG         G.467.TYR*G.511.SERVAL
3ct5A      A.141.ASNPRO*A.139.PROALA
3ct5A             A.43.GLN*A.150.GLN
3ct5A         A.107.TRP*A.108.ILEASN
3ct5A            A.115.PHE*A.107.TRP
3ct5A             A.45.GLU*A.137.GLU
3ct5A            A.136.TYR*A.132.PHE
3ct5A              A.76.TYR*A.70.TRP
3ct5A         A.113.METTHR*A.109.ASN
3ct5A           A.64.GLYPHE*A.69.GLN
3ct5A         A.148.GLYASP*A.126.ARG
3ct5A         A.114.THRPHE*A.107.TRP
3ct5A         A.135.SERTYR*A.107.TRP
3ct5A         A.5.SERASN*A.51.GLYLEU
3ct5A         A.144.GLNPRO*A.146.GLU
3k9fC         C.526.METARG*C.491.PHE
3k9fC         C.616.ARG*C.612.ALAARG
3k9fC         C.506.ASPALA*C.508.ASP
3k9fC         C.631.LYSTRP*C.635.ASP
3k9fC      C.585.GLUMET*B.102.HISGLY
3k9fC            C.578.GLN*C.580.TYR
3k9fC            C.592.TRP*B.293.ARG
3k9fC             C.513.HIS*A.20.TYR
3lg3A         A.263.PHE*A.261.GLUGLY
3lg3A         A.350.PHE*A.317.TYRASN
3lg3A         A.396.THRPHE*A.403.GLU
3lg3A            A.136.GLN*A.148.TYR
3lg3A            A.134.GLN*A.408.TYR
3lg3A             A.46.PHE*A.126.ASN
3lg3A         A.142.GLUPRO*A.148.TYR
3lg3A         A.107.TYR*A.112.LEUTYR
3lg3A            A.253.PHE*A.252.GLU
3lg3A            A.264.PHE*A.258.ARG
3lg3A         A.290.GLU*A.290.GLUTHR
3lg3A         A.323.PHE*A.324.ASNTRP
3lg3A              A.26.ARG*A.16.TRP
3lg3A         A.267.ARG*A.253.PHEILE
3lg3A              A.21.TRP*A.20.ARG
3lg3A             A.90.TYR*A.350.PHE
3lg3A            A.233.ARG*A.187.GLU
3lg3A          A.338.GLNASP*A.66.TYR
3lg3A         A.149.THRASP*A.148.TYR
3lg3A              A.20.ARG*A.55.TRP
3lg3A         A.151.TYR*A.132.ALAASP
3lg3A         A.402.GLN*A.402.GLNGLU
3lg3A         A.378.HIS*A.369.ALATYR
4m7cA         A.223.ARG*A.219.GLNLYS
4m7cA             A.99.ARG*A.143.PHE
4m7cA             A.73.TYR*A.218.GLN
4m7cA            A.120.PHE*A.109.ARG
4m7cA            A.102.ARG*C.504.HIS
4m7cA         A.213.SERTYR*A.212.PHE
4m7cA           A.65.LEUARG*A.69.ARG
4m7cA            A.214.TYR*A.114.GLU
4m7cA         A.111.GLU*A.111.GLUGLU
3gyzA              A.72.TYR*A.69.ASN
3gyzA          A.109.HISTHR*A.93.TYR
3gyzA           A.25.LEULYS*A.65.TYR
3gyzA           A.75.GLYLEU*A.59.PHE
3gyzA            A.127.PHE*A.146.TYR
3gyzA           A.84.GLUGLN*A.86.PHE
3gyzA           A.91.ASP*B.38.ASPILE
3gyzA         A.133.HISSER*A.104.TYR
3gyzA      A.114.GLNLEU*A.119.ALAPRO
3gyzA              A.88.GLN*A.80.TYR
3q87A               A.4.PHE*A.91.PHE
3q87A           A.94.ASP*A.95.VALVAL
3q87A           A.64.HIS*A.62.ASPPHE
2rikA            A.230.ARG*A.228.GLU
2rikA         A.245.SERILE*A.222.TRP
2rikA           A.92.GLN*A.12.ASPLEU
2rikA         A.218.PHE*A.215.THRPRO
2rikA             A.4.PHEASP*A.3.PHE
2rikA         A.143.ARG*A.139.SERSER
2rikA           A.35.TRP*A.58.THRLEU
2rikA         A.159.SERVAL*A.161.GLU
2rikA           A.88.GLN*A.70.GLYGLN
2rikA         A.260.GLN*A.259.TYRGLN
2rikA            A.115.TYR*A.105.ARG
2rikA         A.208.LEUGLU*A.207.HIS
2rikA          A.97.PHE*A.178.SERSER
2y6dA      A.157.ALAASP*A.159.ILEMET
2y6dA         A.121.TYRTHR*A.163.PHE
2y6dA         A.197.PHEASP*A.174.PHE
2y6dA            A.127.HIS*A.121.TYR
2y6dA            A.215.TYR*A.212.ASN
4p2xA            A.419.TRP*A.393.TYR
4p2xA         A.255.ALAASP*A.254.PHE
4p2xA         A.378.GLU*A.378.GLUSER
4p2xA      A.307.GLYVAL*A.310.ARGPRO
4p2xA         A.364.TYR*B.355.GLYVAL
4p2xA         A.315.HIS*A.249.GLUALA
4p2xA         A.367.TRP*A.365.ASPVAL
4p2xA            A.400.PHE*A.424.ARG
3uawA          A.93.ALAILE*A.205.HIS
3uawA             A.192.TYR*A.78.GLN
3uawA            A.125.PHE*A.120.PHE
3uawA         A.128.ALAALA*A.186.TYR
3uawA      A.161.ARGGLU*A.163.SERMET
3uawA         A.181.GLU*A.180.METGLU
3uawA            A.130.ASN*A.195.ASN
3uawA           A.47.GLYPHE*A.39.TYR
3uawA           A.97.ASP*A.97.ASPVAL
3uawA           A.49.THRGLY*A.56.ARG
3uawA      A.158.VALPHE*A.160.TYRARG
3uawA         A.125.PHE*A.126.ALAPRO
4ic1A           A.66.GLU*A.62.HISLEU
4ic1A              A.-2.PHE*B.37.ARG
4ic1A               A.5.PHE*D.72.ASN
4ic1A          A.38.TYRGLU*A.193.PHE
4ic1A          A.97.ARGALA*A.135.TYR
4ic1A             A.137.TRP*A.83.ARG
4ic1A         A.155.ALAGLU*A.157.TYR
4ic1A         A.186.TRP*A.184.PHEASN
4ic1A              A.-2.PHE*B.34.ARG
4ic1A              A.34.ARG*B.-2.PHE
3pa8A          A.42.GLN*A.121.ALAGLY
3pa8A            A.237.PHE*A.189.GLN
3pa8A         A.237.PHE*A.238.ASNPRO
3pa8A            A.218.TRP*A.202.ARG
3pa8A           A.78.TYR*A.79.ASNPRO
3pa8A         A.218.TRP*A.211.LEULEU
3pa8A         A.233.GLU*A.232.LYSGLU
3pa8A         A.205.SERGLU*A.206.GLU
3pa8A              A.40.GLN*A.68.ASN
3pa8A         A.158.PHE*A.159.SERTYR
3pa8A           A.66.GLNLYS*A.65.PHE
1q06A              A.21.GLU*A.18.ARG
1q06A              A.62.GLU*A.59.ASN
1q06A           A.74.GLNARG*A.72.ASP
1q06A           A.54.ARG*A.59.ASNLEU
4j3rA            A.115.PHE*A.273.GLN
4j3rA             A.92.ARG*A.232.TYR
4j3rA            A.124.TYR*A.128.GLN
4j3rA            A.122.PHE*A.118.TRP
4j3rA         A.136.TYR*A.138.GLYASP
4j3rA            A.322.TRP*A.268.PHE
4j3rA      A.233.ASNPRO*A.210.ASNLEU
4j3rA          A.98.PHE*A.360.ALAASN
4j3rA            A.111.TYR*A.273.GLN
4j3rA          A.56.ARGASP*A.142.TYR
4j3rA         A.298.ASP*A.215.ALALEU
4j3rA            A.120.ARG*A.319.TRP
4j3rA             A.77.GLN*A.207.TYR
4j3rA            A.322.TRP*A.330.ARG
4j3rA         A.368.ARG*A.351.LEUASP
4j3rA             A.55.ARG*A.140.TYR
4j3rA         A.172.ILEPRO*A.171.TYR
4j3rA             A.131.ARG*A.53.ARG
4j3rA         A.235.ARG*A.212.GLYPRO
4j3rA              A.94.ARG*A.82.ARG
4j3rA         A.252.PHE*A.146.GLYALA
4j3rA         A.210.ASN*A.208.LYSLEU
4j3rA         A.185.TYR*A.276.PROGLY
4j3rA      A.344.PROALA*A.342.ASNASN
4j3rA            A.323.GLN*A.319.TRP
4j3rA      A.291.METGLY*A.240.SERLEU
4j3rA         A.208.LYSLEU*A.207.TYR
4j3rA            A.126.PHE*A.309.TRP
4j3rA         A.144.ASNTRP*A.143.TRP
4j3rA             A.380.TYR*A.55.ARG
4j3rA        A.93.THRARG*A.80.PROSER
4axnA           A.31.TRP*A.32.HISASN
4axnA           A.78.TYR*A.34.TRPALA
4axnA         A.137.ASP*A.138.ILEASP
4axnA            A.265.ASN*A.315.TYR
4axnA          A.42.TYR*A.269.ALAALA
4axnA            A.322.ARG*A.318.GLU
4axnA         A.221.ASNALA*A.216.TRP
4axnA         A.227.ASN*A.211.GLYGLY
4axnA         A.223.TRP*A.215.ILETRP
4axnA         A.226.GLN*A.207.TYRTYR
4axnA         A.305.ASPASN*A.317.TRP
4axnA            A.306.ASN*A.317.TRP
4axnA         A.142.GLN*A.142.GLNALA
4axnA        A.23.ASNLYS*B.23.ASNLYS
4axnA         A.226.GLN*A.210.GLNGLY
4axnA         A.235.PHE*A.225.THRGLN
4axnA              A.78.TYR*A.79.ASN
4axnA            A.237.TYR*A.286.ARG
4axnA         A.274.VALVAL*A.273.TYR
4axnA          A.66.PHE*A.104.GLYGLY
4axnA           A.76.LYSPRO*A.75.PHE
4axnA           A.87.ARG*A.87.ARGGLN
4axnA         A.223.TRP*A.214.GLYILE
4axnA         A.281.TYR*A.277.LYSGLN
4axnA         A.172.PHEILE*A.171.ASN
4axnA         A.217.VALASP*A.216.TRP
4axnA              A.32.HIS*A.34.TRP
4axnA      A.292.LEUSER*A.287.LEUASP
4axnA          A.46.GLNPHE*A.304.TRP
4axnA         A.222.ALATRP*A.216.TRP
4axnA         A.259.VALILE*A.258.PHE
4axnA           A.78.TYR*A.33.ASNTRP
4axnA         A.267.ASPALA*A.304.TRP
4axnA             A.32.HIS*A.303.ASN
4axnA         A.308.LYSSER*A.315.TYR
1wlzA            A.277.ARG*A.276.ARG
1wlzA         A.265.ILESER*A.300.ARG
1wlzA         A.234.ASPILE*A.238.ARG
1wlzA         A.254.PHEGLU*A.303.TYR
1wlzA         A.263.ASNTHR*A.303.TYR
1wlzA         A.287.ASPARG*A.288.ARG
1wlzA            A.306.PHE*A.310.PHE
2c7pA         A.105.ALAARG*A.109.ARG
2c7pA           A.92.GLYPHE*A.84.PHE
2c7pA         A.191.PHE*A.189.ASNTHR
2c7pA            A.124.PHE*A.120.ASN
2c7pA         A.144.ASPTYR*A.173.ASN
2c7pA         A.181.GLNPHE*A.180.PHE
2c7pA           A.46.GLN*A.41.TRPASP
2c7pA         A.32.GLYALA*A.9.LEUTHR
2c7pA             A.289.TYR*A.52.ASN
2c7pA         A.147.PHE*A.148.HISALA
2c7pA         A.302.PHE*A.279.CYSALA
2c7pA         A.191.PHE*A.222.THRTHR
2c7pA         A.157.TYRGLY*A.186.PHE
2c7pA         A.240.ARG*A.236.GLYGLN
2c7pA         A.119.GLU*A.119.GLUASN
2c7pA           A.39.ASN*A.58.GLUGLY
2c7pA             A.44.TYR*A.297.GLN
2c7pA           A.34.GLUCYS*A.14.PHE
2c7pA           A.38.SERASN*A.37.TYR
3om8A           A.96.LEUGLY*A.95.PHE
3om8A           A.32.ASN*A.37.THRLEU
3om8A         A.154.PHELEU*A.158.TRP
3om8A            A.107.TRP*A.111.HIS
3om8A          A.74.LEUALA*A.107.TRP
3om8A         A.127.TRP*A.129.GLYPRO
3om8A            A.5.SERPHE*A.17.TYR
3om8A          A.72.TYR*A.188.GLYSER
3om8A         A.261.PHE*A.209.THRLEU
3om8A            A.127.TRP*A.197.ASP
3om8A            A.127.TRP*A.199.ARG
3om8A              A.76.ARG*A.11.ASP
3om8A         A.127.TRP*B.156.GLYASN
3om8A         A.206.GLU*A.206.GLUARG
3om8A         A.217.ASP*A.243.VALHIS
3om8A       A.97.GLYLEU*A.101.GLYGLY
2dvzA         A.237.LEUASN*A.229.PHE
2dvzA         A.180.PROALA*A.175.TYR
2dvzA            A.156.HIS*A.172.HIS
2dvzA          A.100.TYR*A.66.ALASER
2dvzA              A.46.GLN*A.43.ARG
2dvzA         A.110.THRASN*A.291.PHE
2dvzA      A.234.PHEPRO*A.229.PHEALA
2dvzA           A.18.SERLYS*A.50.GLN
2dvzA          A.32.SERTHR*A.243.TYR
2dvzA           A.71.ARG*A.67.SERGLU
2dvzA         A.141.PROGLY*A.169.ASP
2dvzA         A.146.TYR*A.171.VALHIS
2dvzA      A.190.ILEGLU*A.188.GLYGLN
2dvzA         A.172.HIS*A.173.VALPRO
2dvzA         A.244.GLYLEU*A.112.PHE
2dvzA         A.229.PHE*A.213.ALAILE
1oygA          A.85.TRP*A.109.LEUALA
1oygA         A.356.PHE*A.354.TYRLEU
1oygA         A.378.GLYTYR*A.379.TYR
1oygA            A.214.TYR*A.143.PHE
1oygA            A.345.ASN*A.414.PHE
1oygA         A.125.TYR*A.137.LYSASN
1oygA            A.340.GLU*A.342.GLU
1oygA         A.261.PHE*A.314.GLYMET
1oygA         A.383.SERLEU*A.353.TRP
1oygA         A.341.ILEGLU*A.262.GLU
1oygA         A.415.ALAVAL*A.414.PHE
1oygA          A.88.TRP*A.107.PHEALA
1oygA         A.227.ASNVAL*A.243.HIS
1oygA            A.126.GLN*A.136.TRP
1oygA         A.236.ASNTYR*A.231.PHE
1oygA         A.183.SERGLY*A.182.PHE
1oygA             A.37.TYR*A.279.ASN
1oygA          A.37.TYR*A.278.PHEASN
1oygA         A.251.VALGLU*A.250.TYR
1oygA         A.347.PHELYS*A.353.TRP
1oygA            A.163.TRP*A.182.PHE
1oygA            A.411.TYR*A.360.ARG
1oygA             A.85.TRP*A.433.ARG
1oygA         A.195.ALAGLN*A.176.ARG
1oygA         A.335.ASNTHR*A.282.TYR
1oygA         A.122.TYR*A.140.GLYARG
1oygA         A.220.GLYASP*A.218.PHE
1oygA          A.165.GLYSER*A.88.TRP
1oygA          A.41.TYR*A.269.ASPGLY
1oygA            A.124.PHE*A.138.ASN
1oygA         A.241.ASP*A.242.ASNHIS
1oygA         A.375.TYR*A.373.ASPILE
1oygA         A.244.THRLEU*A.243.HIS
1oygA         A.410.THRTYR*A.409.PHE
1oygA         A.429.TYR*A.411.TYRSER
1oygA            A.335.ASN*A.282.TYR
1oygA            A.322.TYR*A.176.ARG
4dq9A              A.82.TRP*A.84.ASN
4dq9A             A.173.GLU*B.76.ASP
4dq9A          A.157.PHE*A.98.GLNLEU
4dq9A      A.181.ALAPRO*A.166.GLNTRP
4dq9A            A.102.GLU*A.108.TRP
4dq9A         A.157.PHE*A.162.GLUPRO
4dq9A         A.163.PROASP*A.108.TRP
4x0eA              A.18.TYR*B.18.TYR
4x0eA              A.71.PHE*A.68.ASN
4x0eA              A.20.HIS*A.17.HIS
4x0eA         A.105.THRTHR*A.104.PHE
4x0eA           A.45.TRP*A.83.PROTHR
4x0eA          A.18.TYR*A.185.METPRO
4x0eA         A.137.TYR*A.138.GLULEU
4x0eA          A.21.LEUVAL*B.183.TYR
4x0eA         A.168.SERTHR*A.172.ARG
4bjqA            A.138.TYR*A.141.ARG
4bjqA            A.164.GLU*A.142.GLN
4bjqA          A.92.TRP*C.160.HISLEU
4bjqA             A.92.TRP*C.136.PHE
4bjqA          A.164.GLU*C.89.LYSALA
4bjqA             A.92.TRP*C.160.HIS
4bjqA          A.160.HISLEU*C.92.TRP
4bjqA             A.136.PHE*C.92.TRP
4bjqA            A.162.ARG*H.118.ASN
3fdqA             A.120.TYR*A.84.TYR
3fdqA              A.67.HIS*B.67.HIS
2croA             A.5.ARG*A.1.THRLEU
2croA           A.53.ASN*A.51.ALALEU
2croA            A.61.TYRGLY*A.5.ARG
4esfA              A.26.TYR*A.73.ARG
4esfA           A.83.ARG*A.79.ASNGLU
4esfA           A.79.ASN*A.59.LEUVAL
2h4mC         C.289.TYR*A.380.ALAALA
2h4mC         C.284.ARG*A.505.ALATHR
2h4mC         C.274.GLYPRO*A.730.TRP
2h4mC            C.280.ASN*C.281.PHE
2yd1A            A.152.GLU*A.155.HIS
2yd1A            A.187.TYR*A.184.ASN
2yd1A         A.226.TYR*A.224.ASNLEU
4n2kA           A.72.SERPRO*A.30.TYR
4n2kA         A.286.PHE*A.287.THRASP
4n2kA         A.644.GLUVAL*A.646.HIS
4n2kA         A.373.ARG*A.344.ARGGLY
4n2kA            A.442.ARG*A.448.ARG
4n2kA           A.97.TYR*A.32.ALAALA
4n2kA         A.466.TRP*A.547.CYSLEU
4n2kA              A.47.HIS*A.83.GLN
4n2kA         A.241.TYR*A.242.THRGLY
4n2kA         A.140.TRP*A.148.GLYALA
4n2kA         A.121.ASP*A.119.SERLEU
4n2kA         A.641.PHE*A.585.PHEPRO
4n2kA         A.652.ARG*A.652.ARGARG
4n2kA         A.126.ARG*A.147.GLNGLY
4n2kA         A.275.TYR*A.276.METALA
4n2kA         A.510.GLYGLU*A.529.ASN
4n2kA         A.641.PHE*A.643.GLYGLU
4n2kA         A.509.HIS*A.507.ASPGLY
4n2kA            A.125.ASP*A.131.GLU
4n2kA            A.463.TYR*A.435.PHE
4n2kA         A.269.HISVAL*A.203.TYR
4n2kA         A.297.TRP*A.298.ILEMET
4n2kA            A.260.GLU*A.449.ASP
4n2kA         A.471.HIS*A.409.GLYASN
4n2kA         A.340.GLN*A.313.CYSMET
4n2kA         A.659.LYSTRP*A.661.TRP
4n2kA           A.91.ASP*A.89.SERSER
4n2kA            A.450.PHE*A.454.GLN
4n2kA            A.424.TYR*A.428.ARG
4n2kA             A.192.ASP*A.87.GLU
4n2kA         A.217.VALGLU*A.216.TYR
4n2kA              A.47.HIS*A.46.GLU
4n2kA         A.141.THRTRP*A.140.TRP
4n2kA         A.464.SERASP*A.466.TRP
4n2kA            A.631.PHE*A.615.GLU
4n2kA         A.607.GLN*A.611.GLUCYS
4n2kA         A.126.ARG*A.146.GLYGLN
4n2kA            A.638.TYR*A.646.HIS
3ic6A        A.80.ALASER*A.83.ALAALA
3ic6A           A.63.ASNPRO*A.62.PHE
3ic6A        A.29.GLYSER*A.79.LEUALA
3ic6A           A.70.PHE*A.71.ALALEU
2drpA            A.128.ARG*A.152.ARG
2drpA         A.122.HISILE*A.111.TYR
2drpA         A.125.ASNPHE*A.120.TYR
2drpA            A.154.ASP*A.155.ASN
4ayiD            D.192.ARG*D.175.GLN
4ayiD         D.287.TYR*D.275.GLYASP
4ayiD         D.158.SERGLY*D.143.PHE
4ayiD         D.148.GLU*D.148.GLUVAL
4ayiD         D.268.LYSSER*D.270.HIS
4ayiD      D.191.GLNARG*D.177.GLULYS
4ayiD          D.131.GLYLYS*D.93.ASP
4ayiD         D.233.TYR*D.243.TYRGLY
4ayiD            D.298.GLU*D.166.GLN
4ayiD         D.159.GLYGLU*D.143.PHE
4ayiD         D.194.PHE*D.223.SERSER
4ayiD      D.230.ARGLEU*D.220.LYSALA
4x7rA         A.192.TYR*A.193.VALLEU
4x7rA            A.443.ASN*A.444.HIS
4x7rA          A.68.ASNVAL*A.210.TYR
4x7rA             A.95.ARG*A.134.PHE
4x7rA         A.383.THRTHR*A.382.TYR
4x7rA      A.381.GLYTYR*A.356.GLYGLU
4x7rA         A.389.CYSLEU*A.393.PHE
4x7rA           A.44.LYSGLY*A.43.TYR
4x7rA             A.382.TYR*A.14.ASN
4x7rA      A.426.TYRGLY*A.404.GLYGLN
4x7rA         A.466.PHE*A.436.LYSASN
4x7rA            A.238.ASN*A.212.GLU
4x7rA            A.157.PHE*A.140.ARG
4x7rA         A.123.ILEARG*A.122.TYR
4x7rA            A.235.PHE*A.272.ASN
4x7rA         A.427.GLYPRO*A.431.PHE
4x7rA         A.466.PHE*A.437.ASNGLY
4x7rA         A.471.ARG*A.310.ASNALA
4x7rA            A.387.GLN*A.309.HIS
4x7rA         A.491.PHE*A.487.TRPLEU
4x7rA           A.220.ASP*A.1.METLYS
4x7rA          A.382.TYR*A.14.ASNLYS
4x7rA             A.81.HIS*A.174.TYR
4x7rA         A.365.ALALYS*A.369.GLU
4x7rA            A.426.TYR*A.286.GLN
4x7rA      A.218.SERLYS*A.241.ASNALA
4x7rA         A.165.TYR*A.179.ARGASN
4x7rA             A.43.TYR*A.168.PHE
4x7rA         A.300.PHE*A.298.ASNILE
4x7rA            A.135.PHE*A.119.TYR
4x7rA            A.473.ASN*A.433.GLU
4x7rA             A.85.ASN*A.174.TYR
4x7rA         A.376.ASNVAL*A.378.PHE
3i7dA              A.65.ASP*B.41.GLN
3i7dA             A.102.HIS*A.94.PHE
3i7dA              A.32.ARG*A.12.ARG
3i7dA           A.94.PHE*A.92.ALAALA
3i7dA              A.41.GLN*B.65.ASP
2gecA         A.157.PHE*A.158.ILEPRO
2gecA           A.94.TYRTYR*A.93.PHE
2gecA         A.115.TRP*A.105.ASNTRP
2gecA              A.84.ARG*A.77.PHE
2gecA          A.74.GLN*B.146.ASPGLY
2gecA           A.49.PROLYS*A.51.PHE
2gecA           A.23.ARGPRO*B.35.TRP
2gecA           A.66.GLNGLN*A.68.HIS
2gecA          A.35.TRP*A.131.THRARG
2gecA         A.115.TRP*A.107.GLYASP
2gecA          A.143.ARGPHE*A.58.ASP
3ivpA              A.88.GLU*B.88.GLU
3ivpA           A.84.ARG*B.91.ILEASP
3ivpA              A.69.ASP*B.69.ASP
3ivpA             A.8.TYR*A.9.ASPPHE
3ivpA           A.71.PHE*A.12.ALALEU
3ivpA              A.70.GLU*A.71.PHE
3vbhD              D.48.GLN*C.42.ASN
3vbhD           D.17.ASN*D.15.ASNSER
3vbhD           D.31.ASN*D.38.ALAALA
3vbhD        D.59.ASPILE*D.57.VALLYS
3vbhD           D.49.ASP*A.22.HISALA
2zvfA         A.774.GLUGLU*A.778.ASP
2zvfA            A.892.GLU*A.889.ASP
2zvfA            A.761.GLU*E.738.GLU
2zvfA         A.813.GLU*A.812.ALAGLU
2zvfA            A.772.PHE*B.776.TRP
2zvfA         A.880.ALAGLN*A.881.GLN
2zvfA         A.836.GLYCYS*A.851.PHE
2zvfA            A.776.TRP*B.779.GLN
2zvfA            A.806.ASP*A.805.PHE
3jqyA         A.228.LEUILE*B.150.PHE
3jqyA           A.62.ASN*A.60.ASNASN
3jqyA         A.209.ASN*C.208.GLYASN
3jqyA      A.210.PROALA*A.208.GLYASN
3jqyA         A.247.HIS*A.248.HISHIS
3jqyA           A.82.ASPASN*A.84.ASN
3jqyA            A.169.TYR*A.220.TRP
3jqyA         A.150.PHE*A.148.PROILE
3jqyA              A.89.HIS*A.87.ARG
3jqyA          A.84.ASN*A.100.ALATHR
3jqyA            A.157.ARG*A.160.TRP
3jqyA           A.40.ASN*A.38.SERGLY
3jqyA           A.21.GLN*A.25.LEULYS
3jqyA           A.85.TYR*A.86.VALARG
3jqyA           A.43.VALCYS*A.42.PHE
3jqyA         A.110.ARGARG*A.111.ARG
3jqyA            A.238.TYR*A.169.TYR
3jqyA         A.150.PHE*C.228.LEUILE
3jqyA           A.53.ASN*A.51.LYSGLU
3jqyA         A.208.GLYASN*B.209.ASN
3jqyA            A.131.HIS*A.110.ARG
4b6xA            A.177.GLN*B.196.ARG
4b6xA         A.203.ALAASP*A.207.ARG
4b6xA         A.217.ARG*A.213.ARGASN
3bvpA        A.21.PHESER*A.19.GLUGLY
3bvpA              A.45.TYR*A.62.ARG
3bvpA           A.98.PHE*A.93.LEUVAL
3bvpA           A.39.TRP*A.37.METGLY
3bvpA             A.8.TYR*A.9.THRARG
3bvpA         A.105.PHE*A.106.ILESER
3bvpA              A.21.PHE*A.25.GLU
3bvpA             A.134.ARG*A.88.ARG
3bvpA              A.21.PHE*A.78.TYR
4lcqA         A.224.GLU*A.224.GLUALA
4lcqA         A.134.TRP*A.173.ALAVAL
4lcqA            A.458.PHE*A.114.ARG
4lcqA            A.282.HIS*A.287.HIS
4lcqA         A.338.PHE*A.212.GLYHIS
4lcqA            A.421.TYR*A.290.GLN
4lcqA             A.390.ARG*A.16.ASN
4lcqA            A.361.HIS*A.430.HIS
4lcqA         A.262.ARG*A.261.GLYARG
4lcqA        A.50.ALATHR*A.11.GLYGLY
4lcqA         A.402.TRP*A.431.GLYVAL
4lcqA         A.402.TRP*A.403.ASPPRO
4lcqA             A.403.ASP*A.53.ARG
4lcqA         A.459.ILEHIS*A.458.PHE
4lcqA            A.291.TYR*A.279.ASN
4lcqA         A.298.ARG*A.218.PROGLU
4lcqA            A.157.PHE*A.164.PHE
4lcqA         A.342.PROASN*A.326.PHE
4lcqA             A.128.HIS*A.97.PHE
4lcqA           A.96.ASP*A.64.THRHIS
4lcqA           A.17.GLU*A.17.GLUASP
4lcqA         A.214.GLU*A.214.GLULEU
4lcqA         A.402.TRP*A.432.VALPRO
4lcqA         A.133.TRP*A.103.GLYGLN
4lcqA         A.464.PHE*A.181.VALGLY
3gpvA              A.49.PHE*A.67.TYR
3gpvA              A.44.GLN*A.40.TYR
3gpvA           A.49.PHE*A.47.PHEPRO
4bd2A           A.52.GLN*A.56.THRLYS
4bd2A              A.93.PHE*A.89.ARG
4bd2A            A.151.TRP*A.155.GLN
4bd2A         A.134.ARG*A.130.PROGLU
4bd2A           A.74.METGLU*A.78.ARG
3kipA           A.90.ASPALA*B.11.ASN
3kipA           A.98.PROPHE*A.73.PHE
3kipA           A.52.GLNSER*A.51.PHE
3kipA            A.114.ARG*A.110.ARG
3kipA           A.44.ASN*A.42.LYSASN
3kipA           A.52.GLN*A.52.GLNSER
2db3A         A.202.TYR*A.203.ILEPRO
2db3A         A.578.GLYARG*A.579.ARG
2db3A         A.593.PHE*A.594.ASPPRO
2db3A            A.382.PHE*A.358.PHE
2db3A         A.354.GLYGLY*A.328.ARG
2db3A         A.453.VALALA*A.452.PHE
2db3A            A.575.HIS*A.551.ARG
2db3A         A.464.ASP*A.584.GLYASN
2db3A         A.617.PROASP*A.619.PHE
2db3A            A.446.PHE*A.445.GLU
2db3A         A.253.ARG*A.308.LEUGLU
2db3A         A.402.ASP*A.434.THRPHE
2db3A         A.438.GLU*A.436.PROGLU
2db3A            A.588.ARG*A.560.HIS
2db3A            A.394.ARG*A.312.HIS
2db3A      A.565.ASPMET*A.563.ASNTYR
4nlhA           A.75.TYR*A.76.VALGLU
4nlhA           A.36.TYR*A.83.CYSVAL
4nlhA             A.45.HIS*A.107.HIS
4nlhA              A.35.HIS*B.64.TYR
4nlhA         A.100.TYRGLN*A.118.PHE
4nlhA          A.102.PHECYS*A.19.PHE
4nlhA         A.105.VALTHR*A.104.TYR
4nlhA             A.99.PHE*A.119.GLN
4nlhA              A.33.GLU*B.91.TYR
4nlhA           A.16.HIS*A.14.PROALA
4nlhA           A.41.TYRILE*A.16.HIS
4nlhA              A.31.HIS*B.91.TYR
2e52A         A.154.GLNILE*A.158.GLN
2e52A         A.120.ASN*A.118.ALALYS
2e52A         A.188.PHE*A.181.GLUGLU
2e52A         A.121.GLN*A.121.GLNLYS
2e52A      A.275.ILEASN*A.273.LYSASP
2e52A            A.287.PHE*B.147.GLN
2e52A            A.189.GLU*D.190.GLN
2e52A         A.153.SERGLN*A.208.GLU
2e52A          A.90.ASNALA*A.132.TRP
2e52A         A.213.ARG*B.298.TYRLEU
2e52A          A.251.TYR*A.51.GLUALA
2e52A            A.190.GLN*D.189.GLU
2e52A             A.44.ARG*A.240.PHE
2e52A         A.187.SERPHE*A.186.PHE
2e52A         A.128.ALALEU*A.132.TRP
2e52A          A.91.ALAGLY*A.132.TRP
2e52A         A.192.TRPASN*A.138.TYR
2e52A            A.121.GLN*A.154.GLN
2e52A            A.147.GLN*B.287.PHE
4qriA              A.12.ARG*A.13.PHE
4qriA          A.46.GLYGLY*A.101.ASP
4qriA             A.147.TRP*A.13.PHE
4qriA            A.160.ASP*A.166.ARG
4qriA         A.105.THRGLY*A.107.PHE
4qriA         A.110.GLN*A.110.GLNTYR
4qriA         A.120.ASN*A.118.THRARG
4qriA            A.161.PHE*A.162.ASP
4exlA           A.36.VALGLY*A.84.ASN
4exlA         A.215.ASN*D.215.ASNGLY
4exlA      A.141.GLUVAL*D.141.GLUVAL
4exlA         A.138.ASN*A.147.LEUPRO
4exlA            A.199.TYR*A.164.PHE
4exlA      A.227.ASNASN*A.229.TRPPRO
4exlA            A.153.ASN*A.161.ARG
4exlA         A.154.ARG*A.182.SERASN
4exlA          A.88.PHE*A.280.ASPALA
4exlA          A.236.HIS*A.87.VALPHE
4exlA         A.193.SERPRO*A.115.ASN
4exlA      A.136.VALTHR*A.134.GLYGLU
4exlA            A.129.ARG*A.170.GLU
4exlA        A.37.GLYSER*A.67.GLYSER
4exlA            A.172.GLN*C.172.GLN
4exlA            A.238.TYR*A.102.ASP
4exlA         A.215.ASNGLY*D.215.ASN
4exlA         A.183.ASNGLY*A.204.TYR
3jqwA         A.890.GLYTHR*A.971.TYR
3jqwA         A.903.PHE*A.957.TYRTYR
3jqwA            A.900.TYR*A.960.HIS
3jqwA         A.933.ASN*A.931.ASNASN
3jqwA         A.900.TYR*A.874.SERLYS
3jqwA         A.902.TYR*A.880.GLYPRO
3jqwA            A.902.TYR*A.956.ARG
3jqwA         A.925.TRP*A.937.TYRALA
3jqwA         A.922.GLYALA*A.964.PHE
2nyvA          A.99.GLYPHE*A.215.PHE
2nyvA           A.15.ILEASP*A.85.TYR
2nyvA         A.182.ALALEU*A.184.TRP
2nyvA           A.63.ARGGLU*A.62.PHE
2nyvA           A.20.ASPILE*A.74.TYR
2nyvA           A.34.LEUGLU*A.36.GLU
2nyvA           A.27.LYSTHR*A.73.HIS
2nyvA           A.26.GLU*A.26.GLULYS
2nyvA         A.216.GLUGLY*A.215.PHE
2nyvA      A.213.VALGLU*A.211.HISILE
2nyvA          A.125.TYR*A.92.LEUGLU
2nyvA         A.184.TRP*A.200.ARGPRO
4mvaA           A.46.TYR*A.15.SERARG
4mvaA         A.226.ASPILE*A.228.ASP
4mvaA           A.97.GLU*B.73.ALAPHE
4mvaA         A.230.ALALEU*A.208.GLN
4mvaA              A.98.ARG*A.65.ASN
4mvaA           A.46.TYR*A.14.GLYSER
4mvaA         A.168.PROVAL*A.170.TRP
4mvaA         A.204.GLN*A.204.GLNVAL
4mvaA              A.85.ASP*B.16.ARG
4mvaA         A.224.GLN*A.180.PROALA
4mvaA           A.73.ALAPHE*B.97.GLU
4mvaA         A.167.GLUPRO*A.166.TYR
4mvaA             A.99.ARG*A.146.GLN
4mvaA            A.35.GLYCYS*A.3.HIS
4mvaA              A.74.PHE*A.69.ASN
4mvaA           A.72.GLYALA*A.74.PHE
4mvaA            A.140.GLU*A.189.PHE
4mvaA              A.191.ARG*A.2.ARG
4mvaA             A.98.ARG*A.102.HIS
4mvaA            A.134.ASN*A.170.TRP
2cc6A               A.63.GLU*A.3.PHE
2cc6A           A.14.GLUSER*A.54.TYR
2cc6A           A.14.GLU*A.13.GLUGLU
3ibmA              A.74.HIS*A.72.HIS
3ibmA           A.58.TYR*A.59.PHEGLU
3ibmA           A.14.GLU*A.14.GLUARG
3ibmA      A.148.ASPPRO*A.146.CYSALA
3ibmA         A.144.ARG*A.140.ASPASP
3ibmA           A.49.GLN*A.47.ALAGLY
3ibmA      A.128.ASPSER*A.130.ASPARG
3ibmA         A.103.TYR*A.104.ILEALA
3ibmA            A.113.HIS*A.154.ARG
2j8kA           A.43.ASP*A.61.THRLEU
2j8kA              A.15.ARG*A.10.TYR
3pwxA         A.193.GLN*A.214.ALASER
3pwxA         A.134.PHE*A.143.THRALA
3pwxA         A.200.GLU*A.207.ASNPHE
3pwxA         A.253.PHE*A.249.GLUASN
3pwxA            A.158.ASN*A.160.ASP
3pwxA         A.196.ALALEU*A.211.GLU
3pwxA            A.128.GLN*A.134.PHE
3pwxA          A.166.VALALA*A.62.TYR
3pwxA          A.167.ALALYS*A.62.TYR
3pwxA          A.63.GLN*A.247.HISSER
2x4jA              A.46.PHE*A.17.PHE
2x4jA         A.124.ILEHIS*A.123.TYR
2x4jA          A.134.TRP*A.54.METCYS
2x4jA         A.117.GLU*A.102.GLNGLY
2x4jA          A.134.TRP*A.85.LYSVAL
2x4jA             A.130.TYR*A.63.TRP
2x4jA           A.46.PHE*A.57.GLYASN
2x4jA           A.63.TRP*A.61.GLYVAL
2x4jA         A.107.ASP*A.108.ILEGLY
2x4jA        A.60.ILEGLY*A.58.ASNLYS
3gjaA         A.109.TYRGLN*A.245.HIS
3gjaA           A.39.ARG*A.39.ARGARG
3gjaA        A.88.ASPARG*A.10.PHETHR
3gjaA         A.263.THRGLN*A.297.TYR
3gjaA           A.62.LYSALA*A.68.TYR
3gjaA           A.20.PHE*A.24.GLYTYR
3gjaA              A.40.ARG*A.32.PHE
3gjaA         A.282.ASN*A.275.THRGLU
3gjaA         A.110.GLN*A.110.GLNGLY
3gjaA         A.257.ALAALA*A.256.PHE
3gjaA           A.96.ARG*A.91.GLYSER
3gjaA         A.286.TYR*A.287.GLYALA
3gjaA          A.78.ALAGLU*A.310.TYR
1oo0A             A.6.PHE*A.7.TYRLEU
1oo0A          A.52.PHE*B.153.GLYPRO
1oo0A           A.35.TYR*A.36.ALAASN
1oo0A       A.102.THRSER*A.80.PROPRO
1oo0A             A.7.TYR*A.8.LEUARG
1oo0A           A.71.METGLN*A.72.GLN
1oo0A           A.10.TYR*A.11.TYRVAL
1oo0A            A.141.HIS*B.150.PHE
1oo0A           A.98.ILESER*A.97.HIS
1oo0A              A.40.ASN*A.43.ASN
1oo0A           A.12.VALGLY*A.11.TYR
1oo0A         A.117.PROGLU*A.121.ARG
1oo0A       A.103.SERLYS*A.85.GLYARG
1oo0A           A.14.HIS*A.15.LYSGLY
4i4tF         F.178.GLN*F.177.GLYGLN
4i4tF             F.51.ARG*A.393.HIS
4i4tF             F.54.HIS*A.390.ARG
4i4tF        F.85.PROGLU*F.87.LEUSER
4i4tF         F.335.ALAPRO*A.450.GLU
4i4tF         F.212.ASNILE*F.214.TYR
4i4tF         F.256.TYRGLU*F.257.GLU
4i4tF              F.37.PHE*F.60.GLN
4i4tF           F.67.GLYALA*F.69.ASP
4i4tF             F.73.ARG*A.443.GLU
4i4tF         F.7.ARGASP*F.42.GLYGLU
4i4tF           F.2.TYR*F.359.PHEPRO
4i4tF         F.185.TYR*F.186.LEUGLU
4i4tF         F.264.PHE*F.219.GLYVAL
4i4tF          F.98.TYR*F.130.VALPHE
4i4tF         F.382.HIS*F.383.HISHIS
4i4tF            F.197.ARG*F.256.TYR
4i4tF            F.313.GLN*F.315.PHE
4i4tF          F.312.PHE*F.62.VALASN
4i4tF      F.235.ASPLYS*F.233.PHEGLN
4i4tF            F.27.TRP*F.2.TYRTHR
4i4tF         F.102.PROTHR*F.104.ASN
4i4tF      F.189.PROLEU*F.322.ASPGLU
4i4tF            F.299.GLU*F.211.TYR
4i4tF         F.172.PHE*F.160.ILELEU
4i4tF            F.249.TYR*F.248.GLU
4i4tF         F.301.ALAILE*A.308.ARG
2c1iA            A.266.HIS*A.262.PHE
2c1iA         A.143.GLU*A.143.GLUGLU
2c1iA            A.154.HIS*A.213.PHE
2c1iA         A.410.ASNGLY*A.461.ARG
2c1iA            A.162.PHE*A.166.GLN
2c1iA         A.144.GLU*A.144.GLUTHR
2c1iA         A.238.VALSER*A.242.PHE
2c1iA            A.133.GLN*A.146.GLU
2c1iA         A.144.GLUTHR*A.143.GLU
2c1iA         A.319.GLUGLY*A.321.HIS
2c1iA         A.392.TRP*A.390.LEUASP
2c1iA         A.261.TYR*A.242.PHEASP
2c1iA        A.83.LEUGLN*A.85.GLYGLU
2c1iA            A.300.PHE*A.364.ARG
2c1iA         A.303.GLYLYS*A.328.TRP
4fe7A            A.296.ASN*A.229.ARG
4fe7A      A.212.LYSLEU*A.210.PROGLU
4fe7A      A.228.SERARG*A.230.VALALA
4fe7A           A.92.SERTYR*A.87.TYR
4fe7A         A.124.PHE*A.139.ARGGLU
4fe7A         A.123.ALAPHE*A.143.PHE
4fe7A            A.125.TYR*A.194.ARG
4fe7A         A.125.TYRGLY*A.124.PHE
4fe7A         A.226.TYR*A.227.LEUSER
4fe7A           A.62.ALAASP*A.12.PHE
4fe7A         A.306.GLNVAL*A.293.TYR
4fe7A           A.45.PHE*A.42.GLUGLU
4fe7A            A.36.GLUTRP*A.5.ARG
4fe7A            A.122.PHE*A.111.PHE
4fe7A            A.383.TYR*A.387.ASN
4fe7A            A.121.ARG*A.152.TYR
4fe7A            A.226.TYR*A.200.GLN
4fe7A          A.29.TYR*A.247.ALALYS
4fe7A           A.20.ARG*A.16.LYSALA
4fe7A       A.25.GLYVAL*A.243.GLYTYR
4fe7A            A.157.TYR*A.177.TRP
4fe7A           A.98.TYR*A.82.GLYVAL
2xdwA            A.134.GLU*A.180.HIS
2xdwA         A.565.ASN*A.619.ASNVAL
2xdwA         A.593.HIS*A.591.ILEGLY
2xdwA         A.396.TYR*A.408.TYRHIS
2xdwA         A.260.ARG*A.284.ASPASN
2xdwA           A.30.TRP*A.28.TYRALA
2xdwA      A.281.LYSLEU*A.283.ILEASP
2xdwA            A.333.HIS*A.336.ASP
2xdwA              A.90.TYR*A.76.TYR
2xdwA            A.348.PHE*A.345.ARG
2xdwA            A.494.HIS*A.493.ARG
2xdwA          A.654.ALATHR*A.28.TYR
2xdwA            A.658.TYR*A.662.ARG
2xdwA         A.385.TYR*A.386.SERGLY
2xdwA      A.414.LYSGLU*A.416.GLULEU
2xdwA           A.18.ASP*A.19.TYRHIS
2xdwA         A.214.VALLEU*A.213.HIS
2xdwA         A.132.PHESER*A.178.TRP
2xdwA         A.212.TYR*A.184.GLYMET
2xdwA        A.97.GLNARG*A.95.GLNASN
2xdwA         A.211.TYRTYR*A.187.TYR
2xdwA            A.263.TYR*A.318.PHE
2xdwA              A.17.GLN*A.19.TYR
2xdwA         A.139.PHE*A.140.ALATYR
2xdwA              A.98.ARG*A.89.PHE
2xdwA            A.476.PHE*A.598.ASP
2xdwA            A.188.ASN*A.208.GLN
2xdwA         A.709.ILEPRO*A.708.TRP
2xdwA            A.285.ASN*A.287.GLU
2xdwA           A.80.PHE*A.87.PHETYR
2xdwA         A.595.TRP*A.591.ILEGLY
2xdwA            A.300.PHE*A.318.PHE
2xdwA            A.607.HIS*A.610.TRP
2xdwA         A.335.LYSASP*A.310.ASN
2xdwA            A.668.ASN*A.629.GLN
2xdwA          A.62.LEUTYR*A.708.TRP
2xdwA         A.484.TYR*A.403.SERPRO
2xdwA            A.300.PHE*A.295.ASN
2xdwA         A.398.PHE*A.399.THRSER
2xdwA         A.410.CYSASP*A.409.HIS
2xdwA         A.154.LYSPHE*A.141.TYR
2xdwA         A.150.TRP*A.197.SERASP
2xdwA         A.532.CYSALA*A.442.TYR
2xdwA            A.525.ASN*A.505.ARG
2xdwA         A.226.ALAGLU*A.228.PHE
2xdwA           A.10.TYR*A.11.ARGASP
2xdwA             A.76.TYR*A.423.ARG
2xdwA             A.702.ARG*A.53.PHE
2xdwA         A.293.VALTHR*A.292.TYR
2xdwA      A.642.ASPARG*A.644.VALVAL
2xdwA         A.520.LEUALA*A.610.TRP
2xdwA      A.556.GLYGLY*A.552.GLYGLY
2xdwA         A.673.HIS*A.674.VALASP
2xdwA           A.90.TYR*A.91.ASNTHR
2xdwA             A.658.TYR*A.11.ARG
2xdwA          A.604.SERLYS*A.20.HIS
2xdwA              A.79.HIS*A.88.TYR
2xdwA         A.471.TYR*A.472.GLYTYR
1vhyA         A.111.TRP*A.112.SERGLU
1vhyA             A.7.TYR*A.8.HISPRO
1vhyA            A.43.PHE*A.6.ILETYR
1vhyA         A.162.GLUASN*A.191.ARG
1vhyA               A.43.PHE*A.5.ARG
1vhyA         A.102.LEUGLY*B.221.ARG
1vhyA              A.48.HIS*A.69.ARG
1vhyA         A.103.GLYVAL*A.144.ARG
1vhyA         A.127.LYSILE*A.131.TRP
1vhyA           A.56.GLUSER*A.58.ASN
1vhyA         A.141.GLN*A.141.GLNCYS
1vhyA              A.69.ARG*A.13.GLU
4u83A      A.115.GLYGLU*A.117.TRPILE
4u83A          A.349.ARG*A.26.ALAALA
4u83A             A.160.ASN*A.35.PHE
4u83A           A.31.ARG*A.27.ALAALA
4u83A         A.348.GLU*A.348.GLUARG
4u83A             A.33.HIS*A.203.HIS
4u83A       A.75.ALAALA*A.250.GLYMET
4u83A         A.356.VALCYS*A.360.TYR
4u83A            A.262.TYR*A.336.HIS
4u83A           A.29.ARG*A.25.GLYALA
4u83A          A.105.LYSARG*A.57.TRP
2nx4A          A.25.ARGGLY*B.115.TYR
2nx4A         A.157.GLU*B.176.GLUTHR
2nx4A              A.50.PHE*A.11.ARG
2nx4A          A.115.TYR*B.25.ARGGLY
2nx4A             A.58.ARG*A.118.GLN
2nx4A           A.71.ARGILE*A.91.GLU
2nx4A          A.137.PHE*A.84.ALALEU
2nx4A         A.125.ARG*A.121.ALATHR
2nx4A         A.176.GLUTHR*B.157.GLU
2nx4A         A.106.ALAALA*A.110.TRP
2nx4A            A.180.GLU*C.124.ARG
4m48L           L.33.TYRLEU*L.35.HIS
4m48L         L.189.ARG*L.185.ASPGLU
4m48L           L.54.ASNLEU*L.50.TYR
4m48L          L.35.HIS*H.104.ARGGLY
4m48L           L.37.TYR*L.35.HISTRP
4m48L            L.125.GLN*H.128.TYR
4m48L           L.91.GLN*L.91.GLNPHE
4m48L              L.95.TYR*H.59.TYR
4m48L           L.68.SERGLY*L.72.TYR
4m48L              L.48.TRP*L.38.GLN
4m48L         L.140.PHE*L.174.TYRSER
4m48L         L.10.ILEMET*L.8.PROALA
4m48L      L.183.THRLYS*L.130.GLYALA
4m48L           L.67.GLYSER*L.72.TYR
3n7sC              C.91.ARG*C.37.ARG
3n7sC           C.53.GLU*C.53.GLUTHR
3n7sC              C.59.TRP*B.46.TYR
3n7sC           C.56.TRP*C.52.GLYGLU
3n7sC           C.97.HIS*B.49.TYRGLN
3n7sC           C.45.GLNVAL*C.49.GLU
3n7sC           C.27.CYSGLN*D.78.GLU
3n7sC           C.34.ALALEU*C.38.GLU
3n7sC              C.74.TRP*C.78.GLU
3hzhB          B.43.VALSER*B.127.GLU
3hzhB         B.116.PHE*B.114.PHEVAL
4nu3A         A.183.ASN*A.181.ASNLEU
4nu3A            A.176.PHE*A.203.TRP
4nu3A         A.218.GLUGLY*A.217.PHE
4nu3A         A.171.THRASP*A.200.ASN
4nu3A      A.169.SERSER*A.195.GLYALA
4nu3A         A.152.TYRLYS*A.154.TRP
4nu3A         A.204.GLN*A.204.GLNTHR
4nu3A              A.79.PHE*A.56.ASP
4nu3A      A.156.SERTHR*A.179.ALAGLY
4nu3A            A.152.TYR*A.134.PHE
4nu3A         A.217.PHEGLU*A.216.HIS
4nu3A         A.120.GLN*A.120.GLNILE
1g8eA           A.36.LEUGLY*B.66.HIS
1g8eA              A.62.GLN*B.68.ARG
1g8eA           A.52.PROGLN*B.81.ASP
1g8eA              A.62.GLN*B.34.PHE
1g8eA           A.72.HIS*B.41.GLUMET
2nliA         A.342.GLN*A.342.GLNLYS
2nliA            A.110.ARG*A.331.TRP
2nliA         A.144.GLN*A.144.GLNILE
2nliA         A.200.ARG*A.200.ARGTYR
2nliA      A.135.GLYLEU*A.109.ALAARG
2nliA             A.372.TYR*A.56.ARG
2nliA         A.296.ASPSER*A.295.PHE
2nliA         A.367.ASPASN*A.366.PHE
2nliA          A.43.GLYALA*A.181.ARG
2nliA      A.333.GLYALA*A.325.GLYLEU
2nliA             A.332.GLN*A.16.TYR
2nliA        A.61.LYSLEU*A.59.LYSHIS
2nliA            A.129.PHE*A.164.ASP
2nliA          A.46.GLYASP*A.182.ASP
2nliA              A.52.ARG*A.56.ARG
2nliA         A.368.ASNPRO*A.367.ASP
2nliA         A.263.SERASN*A.244.GLN
2nliA          A.25.LEUGLU*A.324.PHE
2nliA         A.156.ASPILE*A.201.TYR
2nliA             A.304.HIS*A.58.TRP
2nliA             A.58.TRP*A.277.PHE
2nliA          A.297.SERGLY*A.54.ASN
2nliA           A.89.PHE*A.87.ALAPRO
3qd7X         X.137.TYRVAL*X.141.TRP
3qd7X         X.121.HIS*X.162.GLYALA
3qd7X             X.82.TYR*X.165.TYR
3qd7X              X.99.ARG*X.46.ASN
3qd7X             X.103.PHE*X.46.ASN
3qd7X         X.125.ARG*X.123.LYSGLY
3qd7X          X.151.TYR*X.63.GLUPHE
3qd7X           X.64.PHE*X.65.ARGARG
3qd7X           X.83.PROGLN*X.85.GLN
3qd7X          X.87.SERLEU*X.105.PHE
3qd7X         X.149.GLN*X.168.LEUARG
3ewlA        A.61.LEUARG*A.59.GLYTHR
3ewlA            A.9.TYR*A.17.SERARG
3ewlA           A.43.GLU*A.39.CYSARG
3ewlA      A.102.TYRASP*A.100.GLNLEU
3ewlA        A.26.TYRTHR*A.24.ALAGLN
3ewlA           A.90.TRP*A.91.ASNLYS
3ewlA           A.32.TYR*A.66.ILETYR
3ewlA           A.67.TYR*A.69.ASPGLU
1vhcA            A.168.ASN*A.167.HIS
1vhcA           A.42.SERVAL*A.67.PHE
1vhcA         A.154.ALAGLN*A.155.GLN
1vhcA         A.195.ASNASN*A.197.TRP
1vhcA          A.197.TRP*A.31.PROLEU
1vhcA         A.201.GLYARG*A.205.ARG
1vhcA         A.165.GLYLEU*A.185.TRP
4q2wA          A.42.TRP*A.117.SERALA
4q2wA           A.80.ILEPRO*A.79.PHE
4q2wA         A.105.HIS*A.106.LEUSER
4q2wA         A.278.GLU*A.278.GLULYS
4q2wA        A.21.THRALA*A.19.PROVAL
4q2wA         A.199.ALALYS*A.205.PHE
4q2wA           A.90.PHE*A.83.TYRGLU
4q2wA         A.233.THRLYS*A.176.TYR
4q2wA              A.64.TYR*A.53.ARG
4q2wA         A.140.ALATHR*A.179.ASN
4q2wA              A.92.HIS*A.83.TYR
4q2wA            A.176.TYR*A.175.HIS
4q2wA           A.95.ALAGLN*A.79.PHE
4q2wA         A.183.LEULEU*A.169.PHE
4q2wA         A.152.PHE*A.162.LEUGLU
4q2wA              A.93.TYR*A.82.TYR
4q2wA          A.260.ALASER*A.34.TYR
4k68A         A.172.GLYSER*A.219.PHE
4k68A            A.337.TRP*A.271.GLU
4k68A         A.206.TYR*A.207.ASNASP
4k68A         A.197.GLU*A.197.GLUVAL
4k68A             A.153.ARG*A.93.TRP
4k68A         A.233.PROILE*A.235.HIS
4k68A         A.173.SERTRP*A.219.PHE
4k68A         A.295.LYSPRO*A.294.TYR
4k68A           A.77.ASN*A.76.GLUASN
4k68A         A.266.ARG*A.330.LYSILE
4k68A      A.348.ASPPHE*A.351.ILELYS
4k68A         A.365.GLN*A.364.ASNGLN
4k68A           A.97.ASP*A.93.TRPGLU
4k68A           A.93.TRP*A.91.TRPHIS
4k68A           A.64.ALALEU*A.68.ARG
4k68A         A.240.GLNGLU*A.242.HIS
4k68A            A.175.ARG*A.118.HIS
4k68A         A.179.TRPTYR*A.187.PHE
4k68A         A.126.PHE*A.178.PROTRP
4k68A            A.240.GLN*A.271.GLU
4k68A         A.212.GLU*A.211.THRGLU
4k68A              A.93.TRP*A.91.TRP
4k68A         A.177.SERPRO*A.181.ASN
4k68A            A.114.ASN*A.113.HIS
4k68A             A.81.TRP*A.146.HIS
4lo6A           A.44.ASN*A.42.ARGGLN
4lo6A         A.157.PHE*B.366.GLYPRO
4lo6A         A.118.TYR*A.119.METTYR
4lo6A              A.94.ASN*A.89.GLN
4lo6A         A.169.PHE*A.170.LEUTHR
4lo6A            A.168.TYR*B.369.GLU
4lo6A         A.105.PHE*A.149.LEUGLY
4lo6A             A.79.PHE*A.140.GLU
4lo6A              A.97.GLU*A.94.ASN
4lo6A              A.73.TYR*A.81.GLU
4lo6A          A.62.ASP*B.290.THRSER
4lo6A          A.38.TRP*A.174.LYSCYS
4lo6A          A.62.ASPLEU*A.105.PHE
4lo6A         A.151.TYR*A.152.VALLYS
1pm4A          A.23.GLYTHR*A.110.TYR
1pm4A           A.72.TRP*A.65.ARGASN
1pm4A           A.87.GLUASP*A.86.TYR
1pm4A           A.96.TRP*A.35.GLYASN
1pm4A           A.48.ALAVAL*A.47.TYR
1pm4A              A.72.TRP*A.66.ASN
1pm4A           A.77.ARG*C.85.LYSTYR
1pm4A           A.89.TYR*A.87.GLUASP
1pm4A          A.22.THRGLY*A.110.TYR
1pm4A          A.130.PROVAL*C.89.TYR
1pm4A          A.89.TYR*B.130.PROVAL
1pm4A           A.90.TYR*B.72.TRPGLY
1pm4A           A.70.ASN*A.68.GLYGLY
1pm4A           A.85.LYSTYR*B.77.ARG
3tw8B             B.71.ARG*B.101.ARG
3tw8B         B.159.GLUMET*B.147.PHE
3tw8B        B.65.ALAGLY*A.78.GLUSER
3tw8B         B.166.GLU*B.166.GLULEU
3tw8B          B.97.VALASN*B.101.ARG
3tw8B           B.68.GLU*B.66.GLYGLN
1rp3B             B.87.PHE*A.148.PHE
1ggpB          B.225.ASP*A.35.GLYILE
1ggpB            B.254.TRP*B.253.TRP
1ggpB         B.247.ALALYS*B.165.TRP
1ggpB         B.130.TYR*B.232.LEUTYR
1ggpB            B.249.GLN*B.241.GLU
1ggpB            B.267.PHE*A.170.TYR
1ggpB         B.246.ALAALA*B.165.TRP
1ggpB            B.130.TYR*B.128.ASN
1k8kA              A.95.GLN*A.60.PHE
1k8kA          A.102.ARGALA*D.38.PHE
1k8kA         A.257.THRGLY*A.256.TYR
1k8kA         A.274.GLU*A.272.GLYTYR
1k8kA           A.102.ARG*D.6.VALASN
1k8kA           A.28.GLN*A.27.PROGLN
1k8kA            A.334.ARG*A.283.PHE
1k8kA         A.123.ARG*A.119.THRPRO
1k8kA          A.26.GLUPRO*A.378.TRP
1k8kA         A.137.PROGLY*A.109.TYR
1k8kA         A.233.TYR*A.275.ARGPHE
1k8kA         A.120.PROGLU*A.409.ARG
1k8kA           A.57.ASP*A.55.VALASP
1k8kA         A.241.GLUPHE*A.276.PHE
1k8kA         A.114.GLUPRO*A.144.GLN
1k8kA         A.255.GLN*A.254.LYSGLN
1k8kA          A.242.PHE*E.50.LYSALA
1k8kA          A.287.PHE*E.54.PHEPHE
1k8kA          A.86.TRPASP*D.267.ARG
1k8kA         A.267.PHE*A.258.GLYILE
1k8kA            A.252.TRP*A.245.TYR
1k8kA         A.370.HIS*A.151.ALASER
1k8kA         A.141.ILEALA*A.140.TYR
1k8kA         A.389.GLUPHE*A.414.PHE
1k8kA         A.172.ASPGLY*A.198.ARG
1k8kA            A.131.PHE*A.400.TYR
1k8kA         A.411.ASNPRO*A.410.HIS
1k8kA           A.68.GLU*A.68.GLULYS
1k8kA            A.409.ARG*B.200.ARG
3erpA         A.290.ASN*A.288.ASNASP
3erpA            A.316.PHE*A.273.ARG
3erpA           A.66.TYR*A.62.LEUALA
3erpA         A.100.TYRTHR*A.109.ASP
3erpA            A.139.ARG*A.100.TYR
3erpA          A.20.ARG*A.214.LYSGLY
3erpA            A.313.ASN*A.273.ARG
3erpA         A.279.GLNMET*A.275.GLN
3erpA         A.194.PROLYS*A.221.PHE
3erpA         A.109.ASPTRP*A.115.TYR
3erpA         A.126.ARG*A.122.GLNSER
3erpA              A.33.TRP*A.34.HIS
3erpA        A.28.ILESER*A.26.PROALA
3erpA         A.332.PHE*B.105.GLYPRO
3erpA             A.4.GLNPRO*A.3.TYR
3erpA         A.108.GLYASP*A.115.TYR
3erpA      A.182.LEUGLU*A.187.THRPRO
3erpA            A.284.TRP*A.287.ARG
3erpA               A.3.TYR*A.50.GLN
3erpA            A.139.ARG*A.110.TRP
3erpA            A.265.ARG*B.110.TRP
3erpA            A.265.ARG*A.261.GLU
3erpA            A.109.ASP*A.110.TRP
3bj4A         A.606.LEUALA*B.605.ARG
3bj4A            A.591.ARG*A.586.ASN
1wozA          A.131.TYR*A.26.ASNPHE
1wozA              A.84.TRP*A.56.ARG
1wozA         A.127.ASNALA*A.131.TYR
1wozA           A.97.GLYPRO*A.93.ARG
2a1xA            A.220.HIS*A.179.HIS
2a1xA         A.288.HIS*A.184.ARGPRO
2a1xA           A.90.ARG*A.86.GLULYS
2a1xA             A.132.ARG*A.80.ARG
2a1xA         A.181.PHE*A.177.ASPLEU
2a1xA         A.198.HIS*A.199.ILESER
2a1xA           A.65.GLYPHE*A.61.TYR
2a1xA         A.155.HIS*A.156.THRMET
2a1xA              A.44.PHE*A.58.ARG
2a1xA              A.64.ASN*A.60.PHE
1y1xA             A.76.HIS*B.142.ARG
1y1xA         A.129.GLN*A.129.GLNTHR
1y1xA             A.142.ARG*B.76.HIS
1y1xA            A.114.GLU*A.111.ASP
1y1xA         A.109.ARG*A.146.LEUGLY
1y1xA              A.26.ASN*A.24.ASN
1y1xA            A.180.PHE*B.124.TYR
1y1xA           A.72.TYR*A.87.ASPLEU
1y1xA         A.102.ARG*A.117.ALAALA
1y1xA            A.109.ARG*A.143.ARG
1y1xA            A.124.TYR*B.180.PHE
3qvqA            A.181.ARG*D.153.PHE
3qvqA           A.41.GLU*A.42.ILEASP
3qvqA         A.150.PHE*A.170.ASNVAL
3qvqA            A.152.TYR*D.152.TYR
3qvqA             A.35.GLN*A.240.GLN
3qvqA           A.84.GLYSER*A.86.TRP
3qvqA          A.39.TRP*A.112.GLYLEU
3qvqA              A.56.HIS*A.15.ARG
3qvqA         A.192.ILEHIS*A.215.PHE
3qvqA            A.109.TYR*A.108.GLN
3qvqA         A.170.ASN*A.149.SERPHE
3qvqA          A.33.GLYGLN*A.109.TYR
3qvqA            A.153.PHE*D.181.ARG
3qvqA           A.5.TYR*A.188.ALAGLY
3qvqA         A.197.PHE*A.198.ASPVAL
1pjhA          A.64.ARG*A.203.SERSER
1pjhA            A.135.ASP*B.175.TYR
1pjhA           A.23.HIS*A.24.LEUILE
1pjhA      A.195.ILESER*A.193.GLYPHE
1pjhA             A.60.GLN*A.210.ASN
1pjhA             A.49.ASP*A.111.HIS
1pjhA         A.157.THRGLU*A.251.GLU
1pjhA          A.93.TRP*A.259.TRPVAL
1pjhA             A.93.TRP*A.259.TRP
1pjhA         A.150.PHE*A.148.TYRPRO
1pjhA         A.191.GLU*A.187.ASPILE
1pjhA            A.175.TYR*C.135.ASP
1pjhA           A.31.ASN*A.26.ASNPRO
1pjhA         A.146.LEULEU*A.148.TYR
3jxoA            A.148.PHE*B.148.PHE
3jxoA         A.147.GLU*A.140.ILEPRO
4l0nA         A.469.ARG*A.465.GLULEU
4l0nA         A.446.GLU*A.446.GLUGLU
3phf1            1.129.GLN*1.346.TYR
3phf1             1.71.ARG*1.208.ARG
3phf1         1.168.GLNTYR*1.167.PHE
3phf1         1.561.ARG*1.534.CYSVAL
3phf1      1.136.THRMET*1.138.LEUPRO
3phf1         1.484.PHE*1.482.LEUARG
3phf1         1.177.PHELEU*1.299.PHE
3phf1            1.598.GLN*O.132.TYR
3phf1      1.280.GLUPRO*1.277.GLYCYS
3phf1            1.303.HIS*1.307.GLU
3phf1            1.192.HIS*1.237.ASN
3phf1         1.623.ASP*1.655.HISVAL
3phf1            1.245.ASN*1.248.ASP
3phf1         1.250.PHE*1.219.ALAGLN
3phf1          1.75.ILETYR*1.232.PHE
3phf1         1.475.PHE*1.421.LEUPHE
3phf1         1.170.THRGLY*1.169.TYR
3phf1         1.634.ILETHR*1.633.TYR
3phf1         1.476.SERPRO*1.475.PHE
3phf1        1.57.ARGGLU*1.59.ALAASN
3phf1           1.76.TYR*1.77.LYSTHR
3phf1         1.282.GLULEU*1.284.ASP
3phf1           1.40.TRP*1.21.SERGLU
3phf1             1.235.TYR*1.76.TYR
1gmuA         A.119.ARG*A.115.ASPASP
1gmuA           A.64.PHE*A.62.THRGLU
1gmuA           A.34.LEUASN*A.36.ASP
1gmuA              A.60.GLU*A.58.ASN
1gmuA         A.8.LEUGLU*A.10.ILEPRO
1gmuA         A.110.HIS*A.111.ASPHIS
1gmuA         A.127.PHE*A.128.GLYGLN
4aneA            A.112.GLN*A.113.PHE
4aneA         A.118.GLYSER*A.117.HIS
4aneA            A.104.ARG*A.114.ASN
4aneA           A.17.GLNLEU*B.27.GLU
4aneA           A.27.GLU*B.17.GLNLEU
4aneA           A.53.HISGLU*A.59.PHE
1wxxA         A.226.HIS*A.202.ARGLEU
1wxxA         A.345.ASPALA*A.347.HIS
1wxxA            A.204.TYR*A.207.ARG
1wxxA               A.38.TYR*A.2.ARG
1wxxA            A.39.TRP*A.6.ASNALA
1wxxA         A.146.ALALYS*A.148.ASN
1wxxA            A.201.ASN*A.376.PHE
1wxxA         A.231.PHE*A.209.ARGGLY
1wxxA         A.329.HIS*A.293.GLYLYS
1wxxA            A.358.GLN*A.373.TYR
1wxxA            A.179.ARG*C.271.ARG
1wxxA           A.45.ALALEU*A.43.PHE
1wxxA           A.97.LEUVAL*A.83.ARG
1wxxA            A.138.ARG*C.151.ARG
1wxxA      A.100.ALAGLU*A.105.LEUPRO
1wxxA         A.375.LYSPHE*A.335.PHE
1wxxA           A.44.LEUALA*A.43.PHE
1wxxA              A.62.PHE*A.16.ARG
1wxxA             A.368.HIS*A.17.HIS
1wxxA           A.50.ASNPRO*A.49.TYR
1wxxA            A.304.TYR*A.290.PHE
1wxxA        A.67.ASPPRO*A.65.ALAGLU
1wxxA         A.202.ARG*A.198.GLNARG
1wxxA         A.377.ALAVAL*A.379.PHE
1wxxA            A.356.ARG*A.204.TYR
1wxxA        A.53.THRASP*A.55.LEUALA
1wxxA            A.212.ARG*A.280.PHE
1wxxA            A.306.GLU*A.310.ARG
1wxxA           A.33.GLYLEU*A.35.TYR
1qgvA         A.136.TYR*A.134.LYSASP
1qgvA             A.7.HISLEU*A.9.HIS
1qgvA           A.90.ILEMET*A.89.HIS
4ax1B         B.104.PHE*B.102.LEUGLY
4ax1B         B.206.ARG*B.214.ARGGLN
4ax1B       B.120.ASPHIS*B.86.ALATHR
4ax1B          B.80.HIS*B.108.ASPVAL
4ax1B         B.148.ARG*B.144.ASPTHR
4ax1B         B.157.ASNPHE*B.155.ASP
4ax1B             B.49.TYR*B.209.GLU
4ax1B      B.261.THRPRO*B.263.HISPRO
4ax1B         B.296.GLYALA*B.300.ARG
4ax1B             B.49.TYR*B.214.ARG
4ax1B         B.205.TRPARG*B.215.GLN
4ax1B         B.243.PHE*B.195.GLYHIS
4ax1B         B.158.PHE*B.152.ASPARG
4ax1B         B.229.ARGTYR*B.228.PHE
4ax1B         B.220.ASP*B.115.SERHIS
4ax1B      B.200.GLYTHR*B.193.SERPRO
3mv2B         B.187.TYR*B.202.GLYLEU
3mv2B            B.243.PHE*B.247.GLN
3mv2B         B.210.GLNARG*B.211.ARG
3mv2B            B.17.GLNCYS*B.9.ASN
3mv2B         B.270.HIS*B.271.GLUHIS
3mv2B         B.210.GLNARG*B.212.ASN
3mv2B             B.136.ASN*A.-1.HIS
3mv2B           B.47.TYR*B.48.GLNSER
3mv2B         B.207.HIS*B.215.GLUALA
3mv2B         B.273.ALAPHE*A.953.TYR
3mv2B         B.185.TYR*B.181.THRSER
3mv2B              B.35.PHE*B.87.TYR
3mv2B        B.41.LEULEU*B.46.GLNTYR
3g16A          A.103.GLYALA*A.90.TRP
3g16A          A.149.THRSER*B.93.PHE
3g16A            A.118.GLU*A.108.GLU
3g16A         A.103.GLYALA*B.122.PHE
3g16A              A.23.ASN*A.71.TYR
3g16A           A.75.ASP*A.73.THRILE
3g16A          A.102.ARGGLY*A.90.TRP
3g16A           A.56.GLN*A.55.ALAGLN
3g16A              A.92.HIS*A.72.TRP
3g16A            A.141.TYR*B.102.ARG
3g16A          A.93.PHE*B.149.THRSER
3g16A           A.70.SERTYR*A.72.TRP
3g16A              A.40.HIS*A.42.PHE
3g16A         A.122.PHE*B.103.GLYALA
3g16A          A.111.ARG*A.83.THRALA
3g16A            A.102.ARG*B.141.TYR
3g16A           A.96.ASN*A.68.LEUGLY
3mzkB       B.1139.PHE*B.1147.GLUALA
3mzkB       B.1366.ARG*B.1362.SERSER
3mzkB       B.1158.TYR*B.1179.LYSTYR
3mzkB         B.997.HISTRP*B.996.PHE
3mzkB       B.1104.ASNSER*B.1103.TYR
3mzkB       B.1280.PHE*B.1276.ALASER
3mzkB            B.993.PHE*A.258.TRP
3mzkB       B.1045.PHE*B.1046.PROGLY
3mzkB       B.1314.TRP*B.1310.GLUSER
3mzkB         B.998.TRP*A.262.TRPSER
3mzkB    B.1102.LEUTYR*B.1232.LYSSER
3a9fA         A.140.ASPPHE*A.139.PHE
3a9fA            A.166.ARG*A.206.PHE
3a9fA         A.201.TRP*A.205.LYSPHE
3k4oA              A.91.ARG*B.91.ARG
3k4oA         A.115.SERPHE*B.116.PHE
3k4oA      A.229.LYSCYS*A.258.PHESER
3k4oA         A.195.ASPLYS*A.258.PHE
3k4oA            A.116.PHE*B.116.PHE
3k4oA         A.152.ASNGLY*B.136.ARG
3k4oA         A.236.ASN*A.180.ASPVAL
3k4oA         A.116.PHE*B.115.SERPHE
3k4oA          A.239.LYSALA*A.28.ARG
3k4oA      A.213.ASPVAL*A.211.SERILE
3k4oA         A.233.PHE*A.250.GLUVAL
3k4oA          A.30.ALAMET*A.104.TYR
3k4oA         A.235.PHE*A.177.TYRALA
4jlvA       A.1070.GLYTYR*A.1118.ASN
4jlvA            A.202.ASP*A.205.ASP
4jlvA          A.1093.ASN*A.1086.ASN
4jlvA       A.1061.ASNVAL*A.1025.PHE
4jlvA       A.1079.ASP*A.1082.LYSPRO
3cnyA      A.164.THRGLY*A.166.ILEGLN
3cnyA          A.77.SERTYR*A.110.GLU
3cnyA         A.210.ARG*A.180.ASPPRO
3cnyA          A.152.TYR*A.95.CYSGLN
3cnyA         A.266.LYSGLY*A.265.TYR
3cnyA         A.122.ASN*A.231.GLYLEU
3cnyA           A.76.SERSER*A.75.PHE
3cnyA        A.23.ILEPRO*A.21.ASPASP
3cnyA         A.292.TYR*A.246.PROGLY
3cnyA         A.291.ARG*A.287.GLNILE
3cnyA             A.91.PHE*A.145.TYR
3cnyA         A.189.ASPTHR*A.188.TYR
3cnyA           A.74.TRP*A.75.PHESER
3cnyA              A.52.PHE*A.19.ARG
3cnyA              A.78.TYR*A.81.ARG
3cnyA           A.45.GLN*A.44.PHEGLN
3cnyA          A.282.PROLEU*A.18.TRP
3cnyA         A.158.TYR*A.159.HISHIS
3cnyA            A.161.HIS*A.116.GLN
3cnyA            A.135.TRP*A.174.ARG
3u5wA          A.47.SERPHE*A.131.PHE
3u5wA          A.142.GLNALA*A.77.TRP
2qgqA         A.388.GLYARG*A.376.PHE
2qgqA            A.368.ARG*A.365.ARG
2qgqA         A.328.SERASP*A.327.TYR
2qgqA         A.180.LEULYS*B.349.ARG
2qgqA         A.312.GLN*A.312.GLNPHE
2qgqA         A.393.GLUALA*A.224.ARG
2qgqA      A.258.GLYSER*A.309.GLULEU
2qgqA            A.365.ARG*A.283.ARG
2qgqA         A.366.LEUASP*A.420.HIS
2qgqA            A.268.ARG*A.229.HIS
2qgqA         A.212.ARG*A.208.PROASP
2qgqA         A.376.PHE*A.377.LEUVAL
2qgqA         A.170.GLUASP*A.174.ARG
1wcuA           A.95.PHE*A.74.GLYLEU
1wcuA           A.12.THRGLY*A.10.TYR
1wcuA              A.44.GLU*A.26.ASP
1wcuA             A.45.TYR*A.120.GLN
1wcuA           A.95.PHE*A.73.GLUGLY
1wcuA            A.9.VALTYR*A.17.ASN
1wcuA           A.41.ASP*A.26.ASPSER
1wcuA           A.31.PHE*A.14.LYSLYS
1wcuA           A.66.LEUGLN*A.65.TYR
1wcuA           A.10.TYR*A.11.GLUTHR
1wcuA             A.113.GLN*A.57.TYR
1wcuA            A.132.ARG*A.101.PHE
1wcuA         A.136.TYR*A.137.SERTHR
1kkoA         A.309.TRP*A.279.GLYASN
1kkoA         A.114.ARG*A.110.LEUPRO
1kkoA         A.201.GLUGLU*A.202.GLU
1kkoA         A.253.ARGCYS*A.247.PHE
1kkoA            A.266.GLN*A.216.ARG
1kkoA              A.89.PHE*A.84.PHE
1kkoA          A.362.ASN*A.16.TYRPHE
1kkoA           A.16.TYRPHE*A.18.ASP
1kkoA      A.336.GLYGLY*A.131.ARGTYR
1kkoA              A.73.GLN*A.74.TYR
1kkoA         A.356.TYR*A.357.GLNGLY
1kkoA              A.74.TYR*A.20.GLN
1kkoA          A.78.GLYGLY*A.309.TRP
1kkoA         A.309.TRP*A.280.ASNLYS
1kkoA        A.45.SERVAL*A.47.ARGGLN
1kkoA            A.238.ASP*A.240.TYR
1kkoA         A.282.PROASP*A.286.ARG
1kkoA         A.339.HIS*A.113.ALAARG
1kkoA         A.404.ARG*A.400.ASNGLU
1kkoA            A.236.HIS*A.170.PHE
1kkoA         A.309.TRPCYS*A.311.ASN
1kkoA              A.47.ARG*A.32.PHE
1kkoA            A.393.GLU*B.393.GLU
1kkoA         A.297.ARG*A.297.ARGLEU
1kkoA           A.16.TYR*A.15.PHETYR
1kkoA         A.332.THRPRO*A.132.TYR
2o7rA         A.281.ARG*A.205.GLYGLY
2o7rA           A.75.HIS*A.73.PROARG
2o7rA         A.202.PROGLY*A.204.PHE
2o7rA         A.266.TRP*A.195.LYSGLY
2o7rA           A.98.SERALA*A.90.HIS
2o7rA         A.316.ALALYS*A.320.PHE
2o7rA            A.136.TYR*A.177.HIS
2o7rA         A.278.METILE*A.282.GLN
2o7rA             A.124.TYR*A.90.HIS
2o7rA            A.241.ARG*A.228.ASP
2o7rA         A.110.GLUMET*A.320.PHE
2o7rA              A.64.HIS*A.61.ASN
2o7rA         A.195.LYSGLY*A.164.PHE
2o7rA           A.89.PHEHIS*A.88.TYR
2o7rA             A.125.ARG*A.64.HIS
2o7rA            A.306.HIS*A.201.GLU
2o7rA            A.274.HIS*A.215.ARG
2o7rA         A.136.TYRASP*A.181.ARG
4kd6A            A.124.HIS*A.183.GLU
4kd6A         A.142.THRGLY*A.113.GLN
4kd6A          A.93.ARGSER*A.213.ARG
4kd6A         A.169.GLU*A.169.GLUGLU
4kd6A              A.32.ARG*A.85.TRP
4kd6A         A.112.PHE*A.130.GLYGLN
4kd6A           A.47.GLUVAL*A.12.ARG
4kd6A         A.121.ARG*A.120.ILEARG
4kd6A         A.212.PHE*A.208.ASPLYS
4kd6A         A.145.TRP*A.219.GLYPHE
4kd6A             A.93.ARG*A.220.PHE
2g6tA           A.86.ARG*A.86.ARGLYS
2g6tA         A.255.PHE*A.246.LYSPRO
2g6tA         A.191.ASNHIS*B.272.ASN
2g6tA         A.277.GLN*A.277.GLNTYR
2g6tA      A.133.ASNSER*A.209.ARGILE
2g6tA         A.217.VALLYS*A.216.PHE
2g6tA          A.99.PHE*A.100.ASPPHE
2g6tA        A.38.ASPLYS*A.36.SERLYS
2g6tA            A.265.ASN*A.261.TRP
2g6tA         A.193.GLN*A.198.GLUALA
2g6tA         A.268.ALAARG*A.266.TYR
2g6tA         A.265.ASNTYR*A.261.TRP
2g6tA         A.128.LEUGLY*A.130.PHE
2g6tA              A.45.ASP*A.17.TYR
2g6tA            A.140.TYR*A.189.ASN
2g6tA          A.128.LEUGLY*A.93.PHE
2g6tA              A.71.TYR*A.90.ASN
2g6tA         A.284.TRPLEU*A.278.TYR
2g6tA         A.256.PHEPRO*A.255.PHE
2g6tA            A.192.HIS*B.269.ARG
2g6tA         A.269.ARG*A.264.ILEASN
2g6tA            A.192.HIS*A.138.ASN
4qeyA      A.140.GLYSER*J.140.GLYSER
4qeyA         A.136.TYR*A.134.LYSGLU
4qeyA         A.103.GLYSER*A.147.PHE
3jscA              A.30.ASP*A.35.ARG
3jscA            A.3.GLN*A.25.GLNSER
3jscA                A.4.PHE*A.3.GLN
3jscA           A.65.PHE*A.63.GLYASP
3k49A            A.821.GLN*A.822.PHE
3k49A            A.730.GLN*A.731.TYR
3k49A         A.825.TYRVAL*A.779.GLU
3k49A         A.662.HISVAL*A.629.GLN
3k49A         A.659.ASN*A.621.GLNMET
3k49A         A.585.ASPVAL*A.623.TYR
3k49A         A.734.TYRVAL*A.701.GLN
3k49A         A.693.HISSER*A.731.TYR
3k49A         A.598.PHE*A.560.LEUALA
3k49A         A.822.PHEALA*A.824.ASN
3k49A         A.822.PHE*A.771.HISLYS
3k49A         A.737.GLN*A.776.ASNVAL
3k49A            A.695.TYR*A.661.ASN
3k49A         A.593.GLN*A.626.ARGVAL
3k49A         A.678.PHE*A.676.LEUPRO
3k49A         A.640.ARG*A.636.ASPSER
3k49A            A.621.GLN*C.721.ASP
3k49A         A.863.HIS*A.861.ASNARG
3k49A         A.729.ASPGLN*A.773.PHE
4g4kA         A.141.GLUTHR*A.155.GLN
4g4kA            A.197.PHE*A.207.ARG
4g4kA            A.161.PHE*A.174.HIS
4g4kA            A.179.GLN*A.174.HIS
4g4kA         A.141.GLUTHR*A.156.TYR
4g4kA            A.229.TYR*B.178.ARG
4g4kA         A.197.PHE*A.198.ARGCYS
4g4kA            A.221.TYR*B.150.ASN
4g4kA         A.237.LYSILE*A.197.PHE
4gkwA         A.402.TYR*B.402.TYRARG
4gkwA         A.407.PHE*A.405.GLNARG
4gkwA         A.264.GLU*A.260.LYSGLN
4gkwA         A.341.ARG*A.337.SERLEU
4gkwA         A.402.TYRARG*B.402.TYR
4gkwA         A.407.PHE*A.404.ALAGLN
3dodA          A.408.LEUTHR*A.50.PHE
3dodA            A.174.TYR*A.207.HIS
3dodA            A.393.ARG*B.306.TYR
3dodA              A.60.HIS*A.56.ASN
3dodA         A.135.GLU*A.133.LYSPRO
3dodA          A.314.HISGLY*B.17.PHE
3dodA             A.322.GLN*A.86.ASN
3dodA          A.106.ARG*B.11.LYSHIS
3dodA          A.11.LYSHIS*B.106.ARG
3dodA           A.66.ASP*A.62.LYSLYS
3dodA            A.393.ARG*A.396.TYR
3dodA         A.257.PHE*A.281.GLYILE
3dodA      A.128.TRPLYS*A.133.LYSPRO
3dodA             A.396.TYR*A.22.ASP
3dodA            A.306.TYR*B.393.ARG
3dodA         A.318.TYR*B.287.LEUPRO
3dodA            A.299.TYR*A.106.ARG
3dodA            A.366.ASP*A.182.TYR
3dodA            A.316.HIS*A.115.GLU
3dodA         A.244.TYR*A.204.LEUGLU
3dodA          A.313.PHEHIS*B.17.PHE
3dodA      A.264.PHEALA*A.262.LYSMET
3dodA          A.17.PHE*B.314.HISGLY
3dodA           A.78.HIS*A.79.SERTHR
3dodA         A.287.LEUPRO*B.318.TYR
3dodA         A.239.GLU*A.239.GLULEU
3dodA      A.289.ILEALA*A.111.ASPSER
4gggA              A.58.HIS*B.26.TYR
4gggA           A.33.GLU*A.33.GLULEU
4r2bA           A.32.ASN*A.61.SERTRP
4r2bA      A.382.TYRALA*A.376.GLYSER
4r2bA            A.235.ARG*A.207.PHE
4r2bA         A.192.GLNPRO*A.196.ASP
4r2bA              A.93.GLN*A.38.TRP
4r2bA            A.235.ARG*A.169.TRP
4r2bA           A.71.GLYGLY*A.38.TRP
4r2bA         A.270.GLYASP*A.272.TRP
4r2bA           A.29.ASP*A.59.GLYILE
4r2bA         A.192.GLN*A.250.ARGASP
4r2bA         A.190.GLYGLY*A.189.HIS
4r2bA          A.384.ASNPRO*A.97.PHE
4r2bA         A.150.TRPMET*A.152.TRP
4r2bA          A.70.GLYGLY*A.194.TRP
4r2bA        A.82.ARGVAL*A.87.ASNALA
4r2bA         A.293.TYR*A.202.ALAVAL
4r2bA         A.283.LYSPRO*A.288.PHE
4r2bA         A.193.PROTRP*A.393.TYR
4r2bA         A.343.ALAPRO*A.337.ASN
4r2bA            A.150.TRP*A.292.ARG
4r2bA         A.134.TYR*A.103.ALAGLU
4r2bA      A.344.PROALA*A.144.ASNVAL
4r2bA         A.399.GLN*A.399.GLNPHE
4nutA            A.8.ALAPHE*A.80.PHE
4nutA            A.115.TYR*B.259.ASN
1sgmA          A.95.PHE*A.167.SERLEU
1sgmA           A.61.TYR*A.12.LEUHIS
1sgmA        A.97.ASNTHR*A.95.PHEASP
1sgmA           A.96.ASP*A.94.GLNPHE
1sgmA              A.94.GLN*A.95.PHE
1sgmA           A.72.GLN*A.72.GLNSER
3aaaC               C.21.TYR*C.6.PHE
3aaaC              C.65.ASP*C.40.HIS
3aaaC           C.78.GLUGLY*C.80.HIS
3aaaC           C.80.HIS*C.45.CYSGLY
3aaaC           C.12.ASNGLY*C.47.GLN
3aaaC           C.8.TRP*B.138.GLYASP
3qk3A           A.44.GLU*B.49.THRASP
3qk3A         A.196.ARG*A.133.ASPASP
3qk3A           A.77.GLUGLN*A.79.PHE
3qk3A          A.66.TRP*A.105.ARGPRO
3qk3A           A.34.PHEGLN*A.29.TYR
3qk3A         A.161.TYR*A.166.TYRARG
3qk3A         A.180.HISTRP*A.184.TRP
3qk3A         A.145.GLNASP*A.140.TRP
3qk3A            A.181.TRP*A.180.HIS
3qk3A        A.31.LEUGLU*A.57.GLYSER
3qk3A      A.121.ASNPRO*A.149.ALASER
3qk3A         A.188.GLNPRO*A.181.TRP
3qk3A           A.74.PHEARG*A.69.PHE
3qk3A           A.92.TRP*A.88.ARGTRP
3qk3A              A.34.PHE*A.60.GLN
3qk3A            A.198.ARG*A.196.ARG
2j9oA         A.194.LEUASP*A.198.ARG
2j9oA            A.252.ASN*A.251.TYR
2j9oA         A.201.VALTHR*A.203.ASN
2j9oA           A.41.PHE*A.42.ASNLEU
2j9oA         A.261.ARG*A.257.SERGLU
2j9oA         A.109.TYR*A.108.GLNTYR
2j9oA         A.265.ARG*A.261.ARGGLN
2j9oA          A.57.PHE*A.246.METVAL
2j9oA             A.39.TYR*A.170.ARG
2j9oA          A.85.ARG*A.109.TYRALA
2j9oA           A.40.PHEPHE*A.39.TYR
2j9oA         A.252.ASNASP*A.249.ARG
2j9oA            A.102.TYR*A.101.GLN
3b5nB         B.239.GLN*B.239.GLNLEU
1v6iA         A.226.THRSER*A.225.PHE
1v6iA               A.15.ASN*B.2.GLU
1v6iA         A.168.ASPSER*A.167.TYR
1v6iA          A.81.PROALA*A.216.GLN
1v6iA               A.48.TYR*A.6.PHE
1v6iA          A.83.ASP*A.103.GLYGLY
1v6iA         A.154.ASN*A.155.SERVAL
1v6iA             A.79.TYR*A.215.ARG
1v6iA         A.143.ASNSER*A.117.PHE
1v6iA          A.39.LYSVAL*A.215.ARG
1v6iA           A.14.GLYASN*B.53.ARG
1v6iA         A.125.TYR*A.126.SERASN
1v6iA           A.45.ARG*A.95.GLNILE
1v6iA         A.153.TRP*A.154.ASNSER
1v6iA         A.130.TYRASN*A.146.ASP
1v6iA           A.53.ARG*B.14.GLYASN
1v6iA               A.2.GLU*B.15.ASN
2sliA         A.152.TYR*A.160.GLYILE
2sliA         A.126.THRSER*A.188.ARG
2sliA         A.561.TYR*A.594.ALAGLU
2sliA         A.583.VALGLU*A.582.TYR
2sliA         A.248.PHE*A.249.GLYGLY
2sliA            A.652.TYR*A.718.GLU
2sliA            A.570.PHE*A.629.TRP
2sliA         A.562.SERLYS*A.536.PHE
2sliA         A.471.TYR*A.483.SERLYS
2sliA         A.388.PHELEU*A.390.PHE
2sliA      A.220.ALAPHE*A.218.LYSASP
2sliA         A.731.TYR*A.732.ASPSER
2sliA            A.145.GLN*A.241.GLN
2sliA      A.498.SERVAL*A.500.PHELYS
2sliA         A.529.PHE*A.527.SERSER
2sliA         A.646.GLN*A.647.LEUSER
2sliA            A.555.ARG*A.552.ASN
2sliA      A.344.LEULYS*A.342.LEUPRO
2sliA            A.441.TYR*A.435.ARG
2sliA         A.644.GLYTHR*A.611.ARG
2sliA         A.492.ASN*A.457.TYRASN
2sliA            A.164.ARG*A.146.ASP
2sliA            A.495.TYR*A.348.ASP
2sliA            A.465.ASN*A.460.TYR
2sliA            A.386.ARG*A.512.TYR
2sliA         A.274.THRTHR*A.276.TYR
2sliA         A.349.TYR*A.369.GLYSER
2sliA         A.703.ALAVAL*A.702.TYR
2sliA         A.150.HISILE*A.149.PHE
2sliA         A.328.ALALYS*A.327.PHE
2sliA      A.730.LYSTYR*A.710.GLYTYR
2sliA         A.641.THRSER*A.615.ASN
2sliA      A.129.ASNGLY*A.131.ILEGLN
2sliA         A.198.ASPALA*A.221.PHE
2sliA            A.734.TRP*A.643.TYR
2sliA         A.441.TYR*A.447.GLNPRO
2sliA         A.356.TRP*A.314.GLYGLY
2sliA         A.429.ALATYR*A.431.ASP
2sliA         A.353.ASN*A.288.GLUSER
2sliA         A.136.SERVAL*A.135.PHE
2sliA         A.291.TYR*A.315.GLYTHR
2sliA         A.123.TYRLYS*A.190.PHE
2sliA         A.164.ARGASN*A.170.PHE
2sliA            A.203.GLN*A.205.ARG
2sliA            A.452.ARG*A.460.TYR
2sliA      A.349.TYRILE*A.347.ASPASP
2sliA            A.555.ARG*A.572.TYR
4widA         A.120.ARG*A.116.ASPGLU
4widA         A.171.ASPTHR*B.245.HIS
4widA         A.245.HIS*A.241.ASNASN
4widA      A.258.ASPLEU*A.256.TYRASP
4widA            A.323.GLN*A.365.PHE
4widA         A.349.GLULEU*A.345.GLN
4widA            A.122.GLN*A.287.PHE
4widA         A.283.HIS*A.236.GLYPRO
4widA        A.70.PROLEU*A.72.PHEGLU
4widA         A.245.HIS*B.171.ASPTHR
4widA         A.235.GLYGLY*B.378.PHE
4widA           A.66.ASNLEU*A.65.PHE
4ru1A            A.264.GLN*A.241.GLN
4ru1A       A.71.GLYALA*A.286.GLYTYR
4ru1A           A.94.GLU*A.56.THRHIS
4ru1A         A.172.PHE*A.170.GLUGLY
4ru1A      A.274.LEUGLN*A.272.GLYGLN
4ru1A         A.135.ALAPHE*A.151.TYR
4ru1A         A.299.ASNGLY*D.327.PHE
4ru1A      A.138.ALAGLY*A.113.ILEPRO
4ru1A         A.143.TRP*A.150.METTYR
4ru1A         A.314.PHE*A.315.PHEVAL
4ru1A            A.174.HIS*A.201.GLN
4ru1A            A.216.ARG*G.212.GLN
4ru1A         A.151.TYR*A.152.PHEGLY
4ru1A         A.136.PHEASN*A.151.TYR
4ru1A         A.202.TYR*A.203.THRLYS
4ru1A      A.164.GLYALA*A.197.THRPHE
4ru1A              A.85.TYR*A.69.ARG
4ru1A            A.202.TYR*A.195.GLN
4ru1A           A.50.LEUTHR*A.49.HIS
4ru1A         A.139.GLYILE*A.151.TYR
4ru1A         A.266.PROALA*A.270.GLU
4ru1A             A.79.ASP*A.294.TRP
4ru1A         A.152.PHE*A.288.GLUALA
4ru1A         A.268.GLU*A.264.GLNVAL
4ru1A            A.259.PHE*A.190.ARG
4ru1A      A.160.GLYGLN*A.193.GLYVAL
4ru1A         A.327.PHE*D.299.ASNGLY
3nceA             A.176.ARG*B.99.TYR
3nceA      A.197.ASNASN*B.136.LYSTHR
3nceA          A.177.ARG*B.72.TRPARG
3nceA         A.110.GLU*A.110.GLUALA
3nceA         A.150.TRP*A.152.GLYLEU
3nceA          A.68.ASPLYS*B.139.TRP
3nceA          A.89.ARGSER*A.147.TYR
3nceA              A.76.ASN*A.79.ASP
3wp4A            A.166.ARG*A.170.ARG
3wp4A      A.168.GLNALA*A.166.ARGGLN
3wp4A          A.211.SERGLY*A.52.PHE
3wp4A           A.29.TYR*A.22.GLYTHR
3wp4A          A.87.GLN*A.214.ALAASP
3wp4A         A.148.ARGTHR*A.159.PHE
3wp4A         A.116.TRP*A.120.PHEPRO
3wp4A              A.30.GLU*A.61.ARG
3wp4A              A.-2.GLU*A.-1.PHE
3wp4A         A.140.GLNTYR*A.167.GLN
3wp4A               A.43.TYR*A.9.HIS
3wp4A         A.147.THRARG*A.146.ASN
3wp4A         A.189.METTHR*A.162.TYR
3wp4A           A.40.ALATHR*A.42.PHE
3wp4A          A.82.PHE*A.171.ASPCYS
3wp4A           A.32.TRP*A.33.ALAASP
3wp4A         A.216.PHEPRO*A.215.ASP
3wp4A         A.125.TRP*A.123.GLYASP
3wp4A          A.212.GLYTHR*A.52.PHE
3wp4A           A.58.TYR*A.59.LEUCYS
3wp4A              A.42.PHE*A.29.TYR
3wp4A           A.38.ASN*A.36.GLYASN
3wp4A          A.94.TYR*A.204.GLYASN
3wp4A          A.79.LYSALA*A.222.TYR
3wp4A      A.218.TYRALA*A.216.PHEPRO
3wp4A         A.110.TYR*A.101.GLYTRP
3wp4A         A.184.TRP*A.162.TYRPHE
3wp4A             A.48.PHE*A.216.PHE
3wp4A         A.110.TYR*A.100.TYRGLY
3wp4A              A.3.PHE*A.218.TYR
3wp4A            A.134.PHE*A.183.GLN
3ke2A              A.93.HIS*A.89.TRP
3ke2A           A.75.GLYTYR*A.65.PHE
3ke2A              A.32.ARG*A.76.TYR
3ke2A           A.76.TYRTYR*A.65.PHE
3ke2A              A.73.ASN*A.68.ASP
3ke2A           A.83.GLYPRO*B.89.TRP
3ke2A           A.89.TRP*B.83.GLYPRO
3ke2A         A.105.ASPALA*A.104.ASP
4plzA         A.121.ILEILE*A.120.PHE
4plzA         A.261.THRLEU*A.273.PHE
4plzA         A.132.VALGLN*A.273.PHE
4plzA            A.120.PHE*A.249.TYR
4plzA         A.310.ARG*A.310.ARGMET
4plzA            A.301.PHE*A.267.TYR
4plzA            A.160.TYR*A.164.GLN
4plzA            A.161.TYR*A.219.ARG
4plzA           A.33.PHE*A.34.ASPILE
4plzA           A.41.HIS*A.62.GLYSER
4plzA         A.157.ARGLEU*A.161.TYR
4plzA            A.297.GLU*A.294.ASN
4plzA             A.111.HIS*A.66.TYR
4eplA         A.152.LYSGLN*A.171.ARG
4eplA         A.418.GLN*A.412.PHETYR
4eplA            A.225.HIS*A.432.ASN
4eplA            A.462.PHE*A.549.ARG
4eplA         A.108.PROLYS*A.110.PHE
4eplA      A.513.LYSTHR*A.515.ILEGLY
4eplA      A.470.THRASP*A.472.PROGLY
4eplA         A.399.TYR*A.397.GLYLEU
4eplA            A.302.TYR*A.132.ARG
4eplA         A.168.ASNVAL*A.113.PHE
4eplA             A.8.PHE*A.9.ASPMET
4eplA         A.220.PHE*A.221.ALAVAL
4eplA         A.575.PHE*A.510.ARGLYS
4eplA         A.421.PHE*A.422.ILECYS
4eplA         A.421.PHE*A.423.CYSARG
4eplA         A.319.TYR*A.231.PHEARG
4eplA         A.402.ARGLEU*A.401.TYR
4eplA         A.129.PHE*A.182.ILETHR
4eplA         A.465.TYR*A.466.ILEASP
4eplA         A.461.ASPPHE*A.528.PHE
4eplA         A.516.GLYALA*A.510.ARG
4eplA         A.490.LEUGLN*A.570.TYR
4eplA      A.305.METTHR*A.309.METGLU
4eplA         A.359.GLYTYR*A.361.PHE
4x9yA            A.346.ARG*A.316.TRP
4x9yA         A.194.PHEARG*A.231.TYR
4x9yA         A.385.GLU*A.339.METSER
4x9yA         A.314.THRPHE*A.321.TYR
4x9yA         A.466.LYSILE*A.468.TYR
4x9yA         A.170.LEUGLU*A.206.ASP
4x9yA         A.257.LYSTYR*A.286.PHE
4x9yA             A.67.TYR*A.182.TYR
4x9yA           A.30.ARG*A.26.LEUGLU
4x9yA           A.73.SERGLY*A.21.TRP
4x9yA         A.411.ASPASN*A.410.TYR
4x9yA            A.161.ARG*A.105.ASN
4x9yA         A.409.TRP*A.277.LEULYS
4x9yA         A.342.TYR*A.359.GLYPRO
4x9yA            A.344.TRP*A.303.ARG
4x9yA         A.477.PHESER*A.476.HIS
4x9yA         A.481.ASN*A.433.ASPTRP
4x9yA           A.85.ARG*A.25.ALALEU
4x9yA         A.229.PHE*A.230.ILETYR
4x9yA         A.171.GLULYS*A.176.ARG
4x9yA             A.387.ARG*A.31.TYR
4x9yA         A.118.TYR*A.119.PHEASN
4x9yA        A.52.TYRASN*A.54.PROPHE
4x9yA            A.316.TRP*A.315.PHE
4x9yA            A.432.ASP*A.434.TRP
4x9yA           A.94.TYR*A.92.ARGILE
4x9yA              A.72.ARG*A.56.ARG
4x9yA         A.476.HIS*A.438.LEUTHR
4x9yA         A.410.TYRASP*A.409.TRP
4x9yA         A.290.ASPARG*A.252.ARG
4x9yA              A.291.ARG*A.2.TYR
4x9yA       A.63.GLNPRO*A.102.METCYS
4x9yA            A.215.HIS*A.184.ASN
4x9yA         A.225.GLYSER*A.216.ASN
4x9yA      A.485.ASPPRO*A.483.ALAGLU
4x9yA          A.87.ASNASN*A.221.TRP
4x9yA         A.357.TRP*A.355.ASNASP
3te8A           A.35.GLU*A.27.GLYSER
3te8A            A.134.ASP*A.133.ASP
3te8A           A.60.TYR*B.68.ALALEU
3te8A         A.137.TYRTRP*A.130.PHE
3te8A          A.80.ARG*A.140.ALALEU
3te8A           A.42.ARGVAL*B.42.ARG
3te8A           A.76.ASNGLU*A.77.GLU
3te8A           A.68.ALALEU*B.60.TYR
3te8A           A.80.ARGVAL*A.82.TYR
4ln0C         C.244.ASPTHR*C.248.GLN
4ln0C         C.246.TRP*C.238.PHEALA
4ln0C         C.219.LYSGLU*C.218.TYR
4ln0C            C.222.GLU*A.342.TYR
4e08A           A.91.ARG*A.87.GLYASP
4e08A         A.137.TYR*A.138.VALASP
4e08A         A.163.LEULYS*A.186.TYR
4e08A              A.47.ARG*B.27.ARG
4e08A         A.161.PHE*A.102.ALAILE
4e08A              A.27.ARG*B.47.ARG
1e9zA      A.190.GLYGLY*B.104.METGLN
1e9zA            A.165.ARG*A.144.HIS
1e9zA         A.196.PHE*A.203.ASPARG
1e9zA            A.232.TYR*A.216.HIS
1e9zA              A.31.ASN*A.34.GLU
1e9zA           A.59.GLN*A.59.GLNGLU
1e9zA            A.156.PHE*A.158.ARG
1e9zA         A.233.VALLYS*A.232.TYR
2nrkA            A.122.ARG*A.118.ARG
2nrkA           A.89.LEUARG*A.88.TYR
2nrkA              A.67.GLN*A.68.TRP
2nrkA            A.105.PHE*A.106.ASP
2nrkA              A.36.HIS*A.16.PHE
2nrkA         A.120.TYR*A.163.GLUALA
2nrkA         A.142.HIS*A.148.LYSTYR
2nrkA             A.8.TYR*A.9.GLNPRO
2nrkA              A.88.TYR*A.86.ARG
2nrkA           A.72.ARG*A.72.ARGILE
1q5yA            A.127.GLN*B.125.HIS
1q5yA           A.91.ASNHIS*C.79.HIS
1q5yA          A.103.GLYASP*A.51.GLN
1q5yA              A.62.HIS*C.76.HIS
1q5yA         A.125.HIS*A.126.LEUGLN
4iykA         A.155.PHE*A.163.GLYASN
4iykA           A.31.HISGLY*A.76.TYR
4iykA            A.230.TYR*A.213.ARG
4iykA           A.25.GLYPRO*A.82.PHE
4iykA             A.121.ARG*A.38.GLN
4iykA      A.181.PROSER*A.179.PHESER
4iykA         A.191.TYRTHR*A.138.PHE
4iykA          A.95.PHETYR*A.119.TYR
4iykA              A.99.GLU*A.89.ARG
4iykA           A.32.GLYSER*A.76.TYR
4iykA          A.94.ASNPHE*A.119.TYR
3e21A           A.30.LEUGLU*A.35.TRP
3e21A           A.39.ALAALA*A.33.ASN
3e21A               A.35.TRP*A.7.ARG
1n5uA           A.71.GLYASP*A.98.ARG
1n5uA         A.370.TYR*A.366.PROHIS
1n5uA            A.211.PHE*A.242.HIS
1n5uA      A.335.ALAARG*A.220.SERGLN
1n5uA         A.127.PHE*A.165.PHETHR
1n5uA          A.86.GLUMET*A.105.HIS
1n5uA         A.497.TYR*A.498.VALPRO
1n5uA         A.503.ASNALA*A.502.PHE
1n5uA            A.150.TYR*A.257.ARG
1n5uA            A.156.PHE*A.288.HIS
1n5uA         A.395.PHE*A.434.GLYSER
1n5uA      A.560.LYSALA*A.558.CYSCYS
1n5uA            A.353.TYR*A.330.PHE
1n5uA            A.341.TYR*A.338.HIS
1n5uA            A.267.ASN*A.263.TYR
1n5uA         A.485.ARG*A.485.ARGPRO
1n5uA          A.5.SERGLU*A.3.HISLYS
1n5uA            A.580.GLN*A.502.PHE
1n5uA         A.126.ALAPHE*A.134.PHE
1n5uA         A.348.ARG*A.344.VALLEU
1n5uA            A.127.PHE*A.131.GLU
1n5uA                A.3.HIS*A.9.HIS
1n5uA         A.568.PHE*A.510.HISALA
1n5uA         A.383.GLU*A.383.GLUPRO
1n5uA         A.318.ASNTYR*A.326.PHE
3tj4A            A.34.GLYALA*A.9.PHE
3tj4A           A.53.ALAHIS*A.12.HIS
3tj4A            A.127.TRP*A.349.ARG
3tj4A           A.30.TRP*A.50.GLYTHR
3tj4A         A.141.TYR*A.326.LEUGLU
3tj4A            A.308.GLU*A.313.HIS
3tj4A         A.362.GLU*A.362.GLUSER
3tj4A         A.125.PROLEU*A.127.TRP
3tj4A           A.30.TRP*A.31.GLYVAL
3tj4A            A.305.HIS*A.255.GLU
3tj4A            A.229.GLU*A.203.ASP
3tj4A            A.203.ASP*A.205.ASN
3tj4A         A.341.HIS*A.342.VALARG
3tj4A           A.54.HISLEU*A.58.ASP
3tj4A      A.179.ASPPRO*A.177.HISASP
3tj4A         A.323.SERTHR*A.134.ARG
3tj4A            A.336.PHE*A.311.GLN
3tj4A            A.199.ARG*A.170.ARG
3tj4A         A.308.GLU*A.308.GLUMET
3tj4A         A.329.ILEPRO*A.328.TYR
3tj4A            A.214.GLN*A.246.ASN
3o5zA              A.19.ARG*B.19.ARG
3o5zA              A.19.ARG*B.56.TRP
3o5zA           A.77.PHE*A.78.LEUGLY
3o5zA        A.72.GLYTHR*A.51.PROGLN
3o5zA              A.56.TRP*B.19.ARG
3o5zA           A.70.PHEPRO*A.56.TRP
2wlrA         A.238.TRP*A.164.SERHIS
2wlrA         A.156.GLYALA*A.173.ASP
2wlrA         A.332.ASP*A.323.ALAGLY
2wlrA         A.410.GLYPRO*A.353.TRP
2wlrA         A.374.THRPHE*A.363.PHE
2wlrA            A.379.ARG*A.124.GLN
2wlrA              A.44.HIS*A.31.TYR
2wlrA         A.291.VALSER*A.364.TYR
2wlrA            A.238.TRP*A.211.ARG
2wlrA             A.335.ASN*A.55.TRP
2wlrA         A.409.ARG*A.405.ALATHR
2wlrA            A.393.TRP*A.294.ARG
2wlrA         A.393.TRP*A.313.GLYGLU
2wlrA         A.221.GLN*A.221.GLNILE
2wlrA           A.82.TYR*A.23.ILEASP
2wlrA            A.202.HIS*A.203.ASP
2wlrA          A.122.PHE*A.33.GLYTRP
2wlrA            A.396.TRP*A.402.ASN
2wlrA         A.294.ARG*A.298.GLUPHE
2wlrA         A.262.PHE*A.201.ARGHIS
2wlrA      A.399.ASPPRO*A.397.SERSER
2wlrA         A.160.LEUTYR*A.211.ARG
2wlrA         A.383.TRP*A.356.LYSPRO
2wlrA            A.299.PHE*A.409.ARG
2wlrA            A.161.TYR*A.165.HIS
2wlrA           A.70.GLN*A.66.ALATRP
2wlrA         A.359.GLN*A.288.ALASER
2wlrA      A.110.LEUSER*A.112.GLUPRO
2wlrA           A.30.PHETYR*A.26.ARG
2wlrA         A.172.ILEASP*A.171.TYR
2wlrA            A.322.HIS*A.320.TRP
2wlrA            A.390.ASP*A.184.ASN
2wlrA         A.263.GLYVAL*A.202.HIS
2wlrA         A.165.HIS*A.249.GLUARG
2wlrA         A.179.SERGLU*A.183.TRP
2wlrA      A.125.LEUVAL*A.123.GLUGLN
3q98A         A.251.PHE*A.240.ALALYS
3q98A         A.165.HISPRO*A.164.ASP
3q98A           A.90.GLNASP*A.89.GLN
3q98A           A.67.PHEARG*A.69.ASP
3q98A         A.312.CYSTHR*A.311.HIS
3q98A         A.174.ALATRP*A.363.TRP
3q98A         A.175.TRP*A.359.LYSGLU
3q98A         A.195.TRP*A.196.ALATYR
3q98A              A.30.GLN*A.24.PHE
3q98A         A.126.TYRLEU*A.279.GLU
3q98A            A.303.GLN*A.230.TYR
3q98A           A.30.GLN*A.29.GLUGLN
3q98A         A.226.HISPRO*A.310.TRP
3q98A          A.375.ARG*A.21.GLULYS
3q98A         A.252.ARGGLN*A.251.PHE
3q98A         A.228.GLU*A.228.GLUGLY
3q98A             A.58.PHE*A.117.ASP
3q98A             A.164.ASP*A.28.TRP
3q98A            A.375.ARG*A.153.ARG
3q98A           A.89.GLN*A.89.GLNGLN
3q98A         A.226.HIS*A.230.TYRASP
3q98A         A.197.TYR*A.198.SERPRO
3q98A             A.49.ARG*A.394.ARG
3q98A         A.152.GLNARG*A.145.TYR
1ulyA           A.19.GLU*A.19.GLUASP
1ulyA         A.120.GLU*A.120.GLUGLU
1ulyA              A.78.TYR*A.67.ARG
3jzvA           A.70.GLN*A.70.GLNHIS
3jzvA              A.71.HIS*A.69.HIS
3jzvA           A.14.GLNSER*A.13.PHE
3jzvA            A.109.PHE*A.119.PHE
3jzvA          A.155.ALAGLY*A.83.HIS
3jzvA          A.104.TRP*A.69.HISGLN
3jzvA             A.106.TRP*A.68.ARG
3jzvA           A.56.PHEGLU*A.55.TYR
3jzvA      A.124.ASNALA*A.126.GLUARG
2r1fA           A.83.LYSALA*A.82.PHE
2r1fA         A.303.TYR*A.316.PHEASN
2r1fA         A.241.ARG*A.275.THRILE
2r1fA      A.151.LEUGLU*A.153.ASNPRO
2r1fA         A.258.GLYLYS*A.256.TYR
2r1fA            A.323.HIS*A.305.TYR
2r1fA         A.202.TYR*A.207.GLNLEU
2r1fA         A.305.TYR*A.319.ASNLEU
2r1fA            A.156.TRP*A.206.ASN
2r1fA      A.154.PROGLU*A.156.TRPILE
2r1fA            A.153.ASN*A.156.TRP
2r1fA         A.322.SERHIS*A.317.ASN
2r1fA         A.309.ASP*A.313.GLYHIS
2r1fA         A.243.GLNTHR*A.274.TYR
2r1fA         A.163.PROASP*A.162.TRP
2r1fA            A.196.ARG*A.193.TRP
2r1fA         A.193.TRP*A.204.ASPLYS
1hqsA            A.211.HIS*A.207.TYR
1hqsA         A.234.ASNTRP*A.238.GLU
1hqsA      A.375.TRPASN*A.370.LEUGLU
1hqsA            A.125.PHE*A.123.ARG
1hqsA             A.338.HIS*A.87.PHE
1hqsA         A.143.PHE*A.203.ALAALA
1hqsA         A.269.ALAGLN*A.249.PHE
1hqsA         A.136.GLU*A.134.ARGPRO
1hqsA         A.341.PHE*A.368.LEULEU
1hqsA           A.77.ALAGLU*A.81.ASP
1hqsA            A.151.TYR*A.307.ASN
1hqsA         A.145.GLU*A.145.GLUASN
1hqsA         A.235.TRP*A.231.ALAPHE
1hqsA         A.124.TYR*A.135.PROGLU
1hqsA         A.164.GLN*A.164.GLNLYS
1hqsA         A.235.TRP*A.193.SERGLU
1hqsA            A.181.PHE*A.180.ARG
1hqsA         A.341.PHE*A.339.ALAILE
1hqsA            A.169.PHE*B.169.PHE
1hqsA         A.125.PHETHR*A.124.TYR
1hqsA            A.398.ASP*A.399.PHE
1hqsA              A.74.TRP*A.68.TYR
1hqsA              A.35.TRP*A.24.PHE
1hqsA            A.291.GLN*B.315.ASP
2d4gA             A.112.PHE*A.96.ASN
2d4gA         A.112.PHE*A.113.VALPRO
2d4gA            A.41.PHE*A.3.TYRGLY
2d4gA            A.147.ARG*B.162.TYR
2d4gA              A.83.TYR*A.75.PHE
2d4gA             A.127.HIS*A.80.ASN
2d4gA             A.38.ARG*A.100.TYR
2d4gA            A.162.TYR*B.147.ARG
2d4gA         A.142.GLUGLU*A.141.HIS
2d4gA           A.28.TYR*A.21.ARGLYS
2d4gA           A.83.TYR*A.73.SERSER
2d4gA         A.159.TRP*A.152.TYRGLN
2olnA         A.385.PROGLN*A.331.ARG
2olnA           A.61.LEUPHE*A.56.TYR
2olnA              A.53.ARG*A.56.TYR
2olnA      A.345.GLYGLU*A.338.ALAARG
2olnA           A.28.HIS*A.26.ARGGLY
2olnA         A.242.PHE*A.243.TRPPHE
2olnA          A.49.GLUARG*A.260.PHE
2olnA          A.93.GLYASP*A.139.TYR
2olnA            A.303.TRP*A.257.PHE
2olnA         A.262.HIS*A.263.ASNPRO
2olnA             A.332.GLN*A.58.GLN
2olnA             A.4.SERTYR*A.5.TYR
2olnA         A.258.TYRGLY*A.243.TRP
2olnA         A.196.ARG*A.185.GLYVAL
2olnA            A.151.ASP*A.265.TRP
2olnA          A.47.GLYALA*A.153.ARG
2olnA         A.344.HIS*A.182.ASPALA
2olnA           A.52.TRP*A.53.ARGLEU
2olnA         A.144.GLN*A.144.GLNPRO
2olnA       A.88.GLYSER*A.147.GLYGLY
2olnA           A.62.PHE*A.54.LEUGLN
2olnA             A.51.HIS*A.242.PHE
2olnA         A.257.PHE*A.255.ASNLEU
2olnA            A.253.ASP*A.277.PHE
2olnA         A.258.TYR*A.274.GLYPRO
2olnA         A.121.LEULYS*A.120.TRP
2olnA             A.35.ARG*A.207.TYR
2olnA         A.332.GLN*A.331.ARGGLN
2bkfA           A.57.SERILE*A.59.ASN
2bkfA           A.28.TRP*A.60.SERGLN
2bkfA           A.27.THRTRP*A.64.TYR
4acvA           A.73.GLYVAL*A.64.HIS
4acvA             A.112.HIS*A.65.TYR
4acvA           A.6.PHE*B.102.GLNASN
4acvA              A.45.GLN*A.58.TYR
3nemA           A.79.ASN*A.80.PHETHR
3nemA         A.431.ARG*A.436.LEUTHR
3nemA         A.271.PHE*A.272.GLULEU
3nemA         A.353.PHE*A.365.GLYGLY
3nemA         A.228.TRP*A.210.ALAPRO
3nemA            A.433.ARG*B.181.PHE
3nemA         A.233.GLU*A.404.GLYGLY
3nemA            A.329.TYR*A.330.GLN
3nemA               A.42.ARG*A.6.TYR
3nemA           A.67.ARG*A.65.LYSLEU
3nemA            A.339.TYR*A.192.GLN
3nemA            A.160.HIS*B.144.PHE
3nemA            A.181.PHE*B.433.ARG
3nemA                A.6.TYR*A.3.ARG
3nemA         A.418.LEUASP*A.271.PHE
3nemA         A.150.PHE*A.249.ARGLEU
3nemA         A.202.GLYLEU*A.204.ASP
3nemA         A.416.GLNMET*A.357.TYR
3nemA            A.144.PHE*B.160.HIS
3nemA            A.148.ARG*B.148.ARG
3nemA              A.80.PHE*A.12.GLU
3nemA            A.343.TYR*A.351.ARG
3nemA      A.111.GLYLYS*A.113.VALLYS
3nemA            A.156.PHE*A.246.PHE
3nemA         A.213.PHE*A.211.PROILE
3nemA            A.151.PHE*A.207.TYR
2wx3A            A.569.TYR*B.546.GLN
3jskA         A.150.GLUGLY*A.153.TYR
3jskA             A.282.GLU*D.54.PHE
3jskA            A.220.TRP*B.220.TRP
3jskA         A.125.GLNLEU*A.127.PHE
3jskA             A.54.PHE*D.282.GLU
3jskA         A.313.GLYPRO*F.234.ASP
3jskA         A.234.ASP*C.313.GLYPRO
3jskA      A.254.GLYALA*A.249.HISASP
3jskA      A.248.GLYHIS*A.301.METGLU
3jskA           A.52.PHE*A.53.THRPHE
1r26A             A.4.ASPVAL*A.6.TYR
1r26A         A.44.ALATYR*A.0.PROSER
3eeqA              A.48.ARG*A.27.PHE
3eeqA           A.14.TRP*A.12.ASNLEU
3eeqA         A.227.LYSMET*A.229.GLU
3eeqA         A.281.PHE*A.282.METASN
3eeqA         A.259.VALLYS*A.270.PHE
3eeqA         A.334.TYR*A.250.GLYILE
3eeqA             A.61.TYR*A.319.ARG
3eeqA           A.80.TYRALA*A.58.TRP
3eeqA           A.46.HIS*A.30.GLYGLU
3eeqA           A.60.CYSTYR*A.15.ARG
3eeqA         A.271.ARGLEU*A.270.PHE
3eeqA         A.115.ARG*A.111.ASNASP
3eeqA            A.108.TRP*A.141.ARG
3eeqA         A.166.ASPGLU*A.183.ASN
3qtmA         A.140.GLU*A.140.GLUTHR
3qtmA         A.293.PHEALA*A.318.TRP
3qtmA            A.253.PHE*A.249.PHE
3qtmA         A.223.TYR*A.224.PHEASP
3qtmA         A.358.SERGLN*A.362.TYR
3qtmA         A.157.LEUGLY*A.117.HIS
3qtmA            A.326.TRP*A.330.TYR
3qtmA            A.293.PHE*A.318.TRP
3qtmA         A.131.PHE*A.143.THRGLU
3qtmA            A.189.ASN*A.185.TRP
3qtmA            A.212.TYR*A.211.GLN
3qtmA         A.335.SERPRO*A.337.GLU
3qtmA         A.391.TYR*A.363.LEULYS
3qtmA           A.64.ASPASN*A.60.TYR
3qtmA         A.297.TYR*A.314.LYSALA
3qtmA         A.166.SERARG*A.224.PHE
4jnuA            A.469.GLN*C.471.GLN
1vmhA           A.81.GLUGLY*A.83.ASN
1vmhA           A.41.PHE*A.42.CYSPRO
1vmhA        A.15.ASPGLN*A.13.ASNASP
1vmhA         A.120.ASPGLY*A.118.GLU
1vmhA           A.34.SERASP*A.35.ASP
1vmhA           A.75.GLYASP*A.77.TYR
1vmhA          A.112.GLNGLY*A.54.ASN
3v46A            A.269.ASN*A.266.ASN
3v46A            A.337.ARG*A.328.TRP
3v46A            A.324.ASN*A.321.TRP
3v46A            A.302.PHE*A.308.TRP
3v46A         A.264.TYR*A.265.VALASN
3v46A         A.343.PHEHIS*A.342.TYR
3v46A            A.300.ARG*A.298.ASN
3v46A      A.326.TYRGLN*A.328.TRPASN
3cuxA            A.115.PHE*A.187.ASP
3cuxA         A.151.TYR*A.149.LYSGLU
3cuxA            A.308.TYR*A.276.TYR
3cuxA         A.208.PHE*A.206.PROTYR
3cuxA            A.318.ARG*A.319.ARG
3cuxA         A.396.VALTHR*A.395.HIS
3cuxA             A.48.ARG*A.214.GLU
3cuxA         A.388.PHE*A.386.GLNILE
3cuxA         A.377.PHE*A.361.GLYTHR
3cuxA         A.123.TRP*A.173.HISMET
3cuxA          A.37.PHE*A.224.ASPVAL
3cuxA           A.71.ARG*A.63.PHELEU
3cuxA            A.167.TRP*A.222.TRP
3cuxA         A.324.ILEGLY*A.270.ASN
3cuxA      A.164.PROARG*A.115.PHEGLU
3cuxA          A.193.PHE*A.25.GLUALA
3cuxA            A.274.TRP*A.273.ARG
3cuxA      A.199.LEULEU*A.204.SERGLY
3cuxA            A.168.HIS*A.520.PHE
3cuxA         A.465.LEUASN*A.467.ASP
3cuxA         A.103.ALALEU*A.111.PHE
3cuxA         A.359.HIS*A.324.ILEGLY
3cuxA            A.154.ASN*A.105.ASN
3cuxA             A.75.TRP*A.319.ARG
3cuxA         A.111.PHE*A.112.METALA
3cuxA         A.349.ALAASP*A.353.ARG
3cuxA      A.433.GLYALA*A.118.SERASN
3cuxA         A.205.GLYPRO*A.207.TYR
3cuxA         A.424.TYR*A.443.ASPALA
3cuxA            A.455.TRP*A.459.ARG
3cuxA         A.389.ARG*A.357.ASPGLY
3cuxA        A.89.VALGLU*A.87.ARGARG
3cuxA         A.424.TYR*A.424.TYRILE
3cuxA            A.448.GLU*A.278.PHE
3cuxA         A.144.LYSASN*A.143.HIS
3cuxA            A.116.GLU*A.117.ASP
1gnwA         A.171.HISHIS*A.106.GLU
1gnwA           A.57.PHE*A.58.GLUASP
1gnwA            A.153.ARG*A.157.PHE
1gnwA              A.49.ASN*A.65.PHE
1gnwA             A.51.PHE*B.109.GLN
1gnwA            A.165.PHE*A.204.ARG
1gnwA           A.32.HIS*A.33.VALGLU
1gnwA             A.68.ARG*A.107.ASP
1gnwA              A.68.ARG*A.16.ARG
1gnwA         A.106.GLU*A.106.GLUASP
1gnwA         A.159.TYR*A.164.THRPHE
1gnwA               A.48.ARG*A.6.PHE
3giwA            A.251.TRP*A.252.HIS
3giwA         A.134.TYR*A.135.VALGLU
3giwA            A.131.ARG*A.106.ARG
3giwA              A.22.HIS*A.25.ARG
3giwA           A.53.ALALEU*A.51.TRP
3giwA         A.121.GLN*A.121.GLNGLY
3giwA            A.264.GLU*A.262.ARG
3giwA         A.214.ARG*A.210.GLYARG
3giwA           A.42.GLU*A.42.GLUALA
3giwA         A.168.ILEVAL*A.170.HIS
3giwA         A.242.GLU*A.242.GLUPRO
3giwA            A.247.GLN*A.204.PHE
3giwA           A.77.GLYILE*A.79.ARG
2uwjG        G.54.ARGTYR*G.49.LEUALA
2uwjG              G.22.HIS*G.52.GLN
2uwjG           G.38.ASPGLU*G.67.TRP
2uwjG              G.39.GLU*G.67.TRP
2uwjG           G.20.HISCYS*G.22.HIS
2uwjG           G.53.GLYARG*G.55.TYR
2uwjG           G.74.PHE*G.61.PHEALA
2uwjG        G.32.LEUGLU*G.37.GLNASP
2uwjG           G.86.ALALEU*G.78.GLU
2uwjG           G.74.PHE*G.70.LEUGLU
2uwjG           G.38.ASP*G.36.GLYGLN
4k3yA         A.351.GLYPHE*A.300.ARG
4k3yA         A.303.LEUGLU*A.302.PHE
4k3yA         A.282.TYR*A.283.THRSER
4k3yA      A.370.SERLYS*A.368.PROGLY
4k3yA         A.133.PHE*A.159.TYRSER
4k3yA         A.252.HIS*A.250.SERSER
4k3yA            A.364.ARG*A.327.ARG
4k3yA         A.374.PHE*A.375.GLUILE
4k3yA         A.410.TYR*A.421.CYSPHE
4k3yA            A.425.GLU*A.441.ASN
4k3yA         A.120.ASN*A.118.ARGGLN
4k3yA         A.302.PHE*A.289.CYSTHR
4k3yA         A.408.GLYLEU*A.423.TRP
4k3yA         A.178.TRP*A.195.ALAGLY
4k3yA            A.393.ARG*A.395.TYR
4k3yA         A.296.ASNASP*A.293.ASN
4k3yA      A.208.GLYGLY*A.206.LEUTYR
4k3yA         A.242.ALAASP*A.224.ARG
4k3yA         A.121.PHE*A.227.ALASER
4k3yA         A.130.ARG*A.161.VALLYS
4k3yA         A.207.TYR*A.259.ASNGLY
4k3yA            A.296.ASN*A.295.TRP
4k3yA         A.173.PHE*A.174.GLUALA
4k3yA         A.102.ARGGLY*A.101.TYR
4k3yA         A.188.GLNTRP*A.184.HIS
4k3yA         A.270.THRTHR*A.273.PHE
4k3yA         A.121.PHE*A.228.SERSER
4k3yA         A.173.PHE*A.175.ALAVAL
4k3yA            A.256.ARG*A.310.PHE
4k3yA            A.265.TRP*A.253.ARG
4k3yA            A.364.ARG*A.321.PHE
4k3yA         A.407.SERGLY*A.423.TRP
4k3yA         A.295.TRP*A.272.GLYPHE
2vvgA              A.56.ARG*A.58.PHE
2vvgA         A.156.LYSASN*A.158.ASN
2vvgA         A.125.PHE*A.183.THRALA
2vvgA         A.284.HIS*A.285.ILEPRO
2vvgA              A.16.ASN*A.19.GLU
2vvgA          A.58.PHE*A.326.LEUARG
2vvgA         A.311.ASN*A.102.GLYLYS
2vvgA         A.125.PHE*A.182.THRTHR
2vvgA             A.96.TYR*A.328.TYR
2vvgA             A.66.GLN*B.288.ARG
2vvgA          A.74.PHE*A.119.ASNSER
2vvgA           A.78.PHELYS*A.74.PHE
2vvgA         A.164.LYSGLU*A.172.TYR
2vvgA      A.282.ALATHR*A.284.HISILE
2x1fA           A.22.LEUGLY*A.21.TYR
2x1fA              A.33.GLN*A.29.GLN
2x1fA             A.106.HIS*A.61.TYR
2x1fA           A.27.TYRASP*A.57.ARG
2o07A              A.36.GLN*A.20.TRP
2o07A      A.238.ILEPRO*A.244.GLYGLN
2o07A         A.259.PHEGLN*A.288.PHE
2o07A         A.233.TYR*A.234.ALATYR
2o07A         A.281.SERASP*A.285.ARG
2o07A           A.49.GLNASP*A.45.ARG
2o07A         A.295.ARG*A.295.ARGLYS
2o07A         A.102.GLYGLY*A.104.ASP
2o07A         A.280.ASNSER*A.279.TYR
2o07A          A.92.PROASN*A.264.GLN
2o07A           A.22.ARGGLU*A.21.PHE
2o07A      A.264.GLNPRO*A.262.PROVAL
2o07A              A.74.ARG*A.59.TYR
2o07A         A.191.GLN*A.191.GLNLEU
2o07A           A.38.GLU*A.38.GLUGLN
2o07A           A.76.GLU*A.76.GLUPHE
2o07A           A.77.PHE*A.75.ASPGLU
3wwnA           A.37.GLYSER*A.78.TYR
3wwnA          A.227.ARG*B.26.GLUASP
3wwnA         A.192.ASNVAL*A.252.ARG
3wwnA         A.125.LYSVAL*A.118.TYR
3wwnA      A.115.ALAVAL*A.113.LYSTHR
3wwnA            A.112.ARG*A.131.TYR
3wwnA      A.215.ILEGLU*A.213.GLUARG
3wwnA         A.110.GLYARG*A.162.TYR
3wwnA         A.250.ASP*A.193.VALPRO
3wwnA        A.45.ALAGLU*A.50.HISPRO
3wwnA              A.74.PHE*A.78.TYR
3wwnA         A.149.ALAGLY*A.151.TYR
3wwnA      A.106.ARGLEU*A.108.PHEVAL
3wwnA           A.36.GLYGLY*A.78.TYR
4trhA              A.71.HIS*A.67.TYR
4trhA         A.134.GLN*A.134.GLNLEU
4trhA         A.381.HIS*A.379.GLUPRO
4trhA         A.357.GLU*A.431.LYSPHE
4trhA         A.404.TYR*A.400.GLUPRO
4trhA         A.339.SERSER*A.211.PHE
4trhA         A.304.SERGLU*A.242.ARG
4trhA         A.193.GLN*A.193.GLNALA
4trhA         A.244.ASP*A.242.ARGILE
4trhA            A.172.ARG*A.142.GLN
4trhA       A.62.SERGLY*B.276.LYSLEU
4trhA            A.372.PHE*A.359.ASN
4trhA         A.340.SERASP*A.211.PHE
4trhA      A.178.PHEASN*A.176.PROLEU
4trhA       A.276.LYSLEU*B.62.SERGLY
4trhA      A.334.GLYALA*B.334.GLYALA
4trhA           A.22.VALASP*A.21.TYR
4trhA         A.238.LYSASP*A.240.GLU
4trhA            A.460.PHE*A.500.ASN
4trhA         A.418.SERPRO*A.411.HIS
4trhA         A.203.GLYTYR*A.207.ARG
4trhA         A.476.ARG*A.149.GLUILE
4trhA         A.192.ARG*B.298.METLEU
4trhA            A.381.HIS*A.375.PHE
4trhA             A.463.GLN*A.16.ARG
4trhA         A.221.ASN*A.219.PROILE
4trhA          A.39.GLUILE*A.435.HIS
4trhA         A.104.GLULYS*A.108.ARG
4trhA         A.355.LEUALA*A.178.PHE
4oxxA         A.125.HIS*A.126.ASPTHR
4oxxA         A.8.GLYTHR*A.65.ALAGLY
4oxxA              A.72.PHE*A.64.PHE
4oxxA               A.35.ASP*A.7.TYR
4oxxA          A.89.VALPHE*A.140.TRP
4oxxA         A.9.THRGLU*A.65.ALAGLY
4oxxA       A.115.GLYGLY*A.82.LEUSER
4oxxA          A.117.THRGLN*A.87.PHE
4oxxA           A.64.PHE*A.68.GLYALA
1v47A         A.269.TYRALA*A.273.ARG
1v47A            A.162.GLN*A.241.HIS
1v47A          A.96.GLUALA*A.100.ARG
1v47A         A.151.ARG*A.147.ARGALA
1v47A         A.347.ARG*A.343.PROILE
1v47A           A.20.ASNLEU*A.26.PHE
1v47A         A.233.ALAGLY*A.266.TYR
1v47A         A.198.ASPPHE*A.323.ARG
1v47A            A.153.ARG*A.149.PHE
1v47A           A.91.TYR*A.34.THRARG
1v47A            A.304.ARG*B.220.ARG
1v47A            A.338.ARG*A.215.PHE
1v47A         A.155.TRP*A.183.ASPGLY
1v47A         A.293.HIS*A.299.GLYILE
1v47A         A.222.ALAPHE*A.224.PHE
1v47A            A.168.HIS*A.171.HIS
1v47A            A.220.ARG*B.304.ARG
1v47A         A.301.ALASER*A.292.PHE
1v47A          A.123.ALALEU*A.91.TYR
1v47A         A.323.ARGALA*A.327.ARG
1v47A            A.338.ARG*A.169.ARG
1v47A         A.147.ARG*A.143.PROGLU
1v47A         A.253.PHE*A.241.HISALA
1v47A         A.103.PHE*A.112.GLYVAL
1v47A          A.122.TYR*A.63.GLULYS
3zeuA           A.27.PHEGLU*A.26.HIS
3zeuA             A.217.TYR*B.49.ARG
3zeuA         A.119.METGLY*E.294.ARG
3zeuA         A.125.ALAGLU*A.124.TRP
3zeuA           A.72.ARG*A.68.PHETHR
3zeuA        A.76.GLYILE*B.93.THRVAL
3zeuA            A.129.ARG*A.103.TRP
3zeuA            A.132.GLN*A.130.ASP
3zeuA            A.192.GLU*A.104.ARG
3zeuA         A.211.GLU*A.209.ALAVAL
3zeuA         A.220.ASN*A.218.LEUARG
3zeuA           A.72.ARG*B.48.SERARG
3zeuA        A.80.GLYLEU*B.97.SERLEU
3zeuA         A.127.TYR*A.137.GLYGLU
3zeuA          A.123.TYR*A.65.PROGLY
4pmjA          A.110.ASPLEU*A.78.PHE
4pmjA           A.32.LYSTHR*A.36.GLU
4pmjA           A.63.GLU*A.54.ALAGLU
4pmjA          A.112.TYR*A.82.LYSVAL
4pmjA         A.141.TRP*A.162.ASNVAL
4pmjA           A.12.ASP*A.10.PHEPRO
4pmjA         A.274.ARGLYS*A.179.PHE
4pmjA          A.127.ALAALA*A.90.ARG
4pmjA         A.256.HIS*A.254.ASPILE
4pmjA           A.64.ARG*A.60.GLYALA
4pmjA              A.251.ASP*A.2.HIS
4pmjA         A.195.TYR*A.168.VALLEU
4pmjA          A.102.ARG*A.98.GLUARG
3kxyT           T.22.HIS*T.26.ARGSER
3kxyT           T.74.GLU*T.72.PROLEU
3kxyT              T.22.HIS*K.17.ARG
3kxyT              T.38.ARG*B.77.ARG
3kxyT           T.67.ASPGLY*T.69.ASP
3cxbA         A.223.HIS*A.221.LEUHIS
3cxbA         A.131.METLYS*A.119.PHE
3cxbA           A.79.SERGLN*A.80.GLN
3cxbA              A.27.TRP*A.55.PHE
3cxbA      A.190.ARGLYS*A.188.GLULEU
3cxbA             A.300.HIS*A.63.GLU
3cxbA         A.152.TYR*A.153.SERGLU
3cxbA            A.158.TYR*A.304.ARG
3cxbA            A.299.PHE*A.205.TYR
3cxbA           A.74.GLU*A.74.GLULEU
3cxbA         A.327.GLN*A.326.GLUGLN
3cxbA            A.303.PHE*A.299.PHE
4l1nA          A.99.PHE*A.118.LYSGLY
4l1nA         A.156.TYR*A.157.ILEASP
4l1nA          A.83.LYSLYS*A.191.GLN
4l1nA      A.100.ALATHR*A.119.GLYGLU
4l1nA         A.159.TRP*A.105.ASNSER
4l1nA            A.162.ASP*A.108.ASN
3iecE         E.948.PHE*A.251.ASPGLY
1elwA           A.97.GLUGLY*A.75.TYR
1elwA          A.111.GLYLEU*A.95.TYR
1elwA           A.43.ASNARG*A.27.TYR
1elwA           A.48.TYR*A.56.LYSALA
1elwA        A.14.ALALEU*A.19.ASNILE
1elwA           A.88.PHE*A.86.ASNARG
1elwA              A.84.PHE*A.54.TYR
1elwA           A.52.GLYASP*A.54.TYR
1elwA             A.88.PHE*A.118.ARG
3r6nA         A.455.TYR*A.449.LYSPRO
3r6nA         A.253.GLU*A.253.GLUGLU
3r6nA            A.587.TYR*A.612.PHE
3r6nA         A.217.HIS*A.213.SERVAL
3r6nA         A.342.PROALA*A.207.TRP
3r6nA            A.194.TRP*A.198.GLN
3r6nA         A.380.GLN*A.380.GLNPHE
3r6nA         A.455.TYR*A.456.ARGSER
3r6nA            A.537.TRP*A.541.TYR
3r6nA            A.194.TRP*A.231.TYR
3r6nA            A.371.HIS*A.298.TRP
3r6nA      A.403.TYRPRO*A.401.LYSLYS
3r6nA         A.552.TYRCYS*A.586.HIS
3r6nA            A.304.ASN*A.307.GLN
3r6nA         A.470.LYSGLN*A.469.TYR
3gdmA         A.239.ALALYS*A.242.ARG
3gdmA          A.256.TRP*A.29.GLNTHR
3gdmA           A.90.GLU*A.60.THRHIS
3gdmA              A.94.PHE*A.92.ARG
3gdmA         A.208.ASP*A.206.LEUASP
3gdmA           A.69.SERMET*A.68.PHE
3gdmA         A.178.PHE*A.146.GLYLEU
3gdmA            A.9.ARGALA*A.22.PHE
3gdmA              A.259.TYR*A.6.TYR
3gdmA         A.252.ARG*A.252.ARGLYS
3gdmA              A.92.ARG*B.92.ARG
4m9cA         A.165.TYR*A.166.ILEGLY
4m9cA             A.129.HIS*A.76.ARG
4m9cA            A.133.TYR*A.115.PHE
4m9cA         A.157.ASN*A.176.THRPRO
4m9cA         A.115.PHE*C.115.PHETHR
4m9cA         A.115.PHETHR*B.115.PHE
4m9cA          A.138.HIS*B.12.GLYPHE
4m9cA           A.94.GLN*A.93.VALGLN
4m9cA      A.209.PROALA*A.207.GLYASN
4m9cA          A.12.GLYPHE*C.138.HIS
4m9cA         A.129.HISALA*A.128.PHE
1nzjA           A.48.ASPPRO*A.52.GLU
1nzjA           A.81.ARGHIS*A.85.TYR
1nzjA         A.125.GLYPRO*A.100.TYR
1nzjA            A.257.GLN*A.277.ASN
1nzjA            A.210.TRP*A.208.PHE
1nzjA         A.210.TRP*A.208.PHEGLY
1nzjA            A.120.ARG*A.134.ARG
1nzjA         A.197.PROTHR*A.201.GLN
1nzjA           A.62.ARG*A.58.GLUTHR
1nzjA            A.115.TYR*A.132.ARG
1nzjA            A.154.GLU*A.158.ARG
1nzjA          A.99.TYR*A.119.CYSARG
1nzjA          A.31.LEUGLN*A.278.TRP
1nzjA            A.181.HIS*A.210.TRP
1nzjA            A.262.TRP*A.263.GLN
1nzjA         A.279.ARGLEU*A.278.TRP
1nzjA            A.278.TRP*A.256.GLN
1nzjA             A.81.ARG*A.182.PHE
2fstX          X.95.SERLEU*X.342.TYR
2fstX         X.324.ASPGLN*X.323.TYR
2fstX         X.200.TYR*X.198.METHIS
2fstX         X.348.PHE*X.349.VALPRO
2fstX            X.20.VALPRO*X.8.PHE
2fstX         X.155.ASN*X.167.LEUASP
2fstX         X.132.TYR*X.311.TYRHIS
2fstX            X.133.GLN*X.129.PHE
2fstX          X.337.TRP*X.65.ALALYS
2fstX           X.42.PHE*X.43.ASPTHR
2fstX            X.142.HIS*X.202.GLN
2fstX         X.186.ARG*X.227.ASPHIS
2fstX         X.313.ASPPRO*X.312.HIS
2fstX          X.140.TYR*X.79.LYSHIS
2fstX               X.5.ARG*X.94.ARG
2fstX         X.313.ASPPRO*X.317.GLU
2cayA           A.80.SERSER*A.79.TYR
2cayA           A.44.ARGGLY*A.59.ASP
2cayA                A.2.GLU*A.3.TYR
2cayA              A.18.ARG*A.53.ARG
2cayA              A.42.ARG*A.65.ASN
2cayA               A.3.TYR*A.94.PHE
2cayA          A.267.LEUPHE*A.25.PHE
2cayA          A.255.PHE*A.35.GLYLYS
2cayA             A.6.TYR*A.7.VALGLU
2cayA              A.93.PHE*B.76.TYR
2cayA           A.34.HIS*A.-1.HISHIS
2cayA           A.56.TYR*A.57.ILEASP
2cayA              A.21.GLU*A.52.GLN
2cayA              A.33.TYR*A.89.ARG
2cayA            A.5.HIS*A.68.GLYLEU
3czhA            A.133.TRP*A.446.ARG
3czhA            A.172.TYR*A.177.PHE
3czhA         A.147.PHE*A.275.HISPHE
3czhA           A.80.ASP*A.84.ILESER
3czhA         A.417.PROGLU*A.409.PHE
3czhA         A.151.GLN*A.147.PHEGLY
3czhA         A.259.ARG*B.205.THRASP
3czhA         A.147.PHE*A.274.GLNHIS
3czhA         A.268.ARG*A.281.LEUASP
3czhA         A.471.LEUHIS*A.470.HIS
3czhA         A.302.PHE*A.298.GLUASN
3czhA         A.192.ASN*A.188.SERASN
3czhA            A.409.PHE*A.405.TYR
3czhA         A.370.ARG*A.370.ARGPHE
3czhA         A.232.PHEPRO*A.234.TRP
3czhA           A.65.TYR*A.54.SERLEU
3czhA            A.337.GLN*A.501.ARG
3czhA         A.421.HISPRO*A.367.GLU
3czhA            A.199.ARG*A.164.PHE
3czhA            A.278.ASP*A.275.HIS
3czhA           A.77.PHE*A.69.GLNSER
3czhA         A.154.PHE*A.148.GLYTYR
3czhA         A.208.GLN*A.204.ASPTHR
3czhA            A.179.PHE*A.177.PHE
3czhA        A.74.GLYGLU*A.76.ILEPHE
3czhA         A.144.PHEARG*A.149.TYR
3czhA            A.126.ASN*A.115.PHE
3czhA            A.362.GLU*A.432.PHE
3czhA         A.166.ASNASP*A.468.ARG
3czhA             A.48.PHE*A.232.PHE
3czhA           A.42.GLYPRO*A.73.TYR
1c1yB           B.89.ARGGLY*A.25.GLN
1c1yB         B.124.GLUGLU*B.125.GLU
1c1yB           B.94.GLU*B.92.GLNPRO
1c1yB              B.89.ARG*A.40.TYR
3tlqA      A.173.ILETHR*A.175.HISARG
3tlqA              A.42.ARG*A.33.HIS
3tlqA         A.219.GLN*A.219.GLNGLY
3tlqA           A.81.PHE*A.26.VALGLY
3tlqA         A.214.ASP*A.212.PROPHE
3tlqA             A.161.ARG*A.81.PHE
3tlqA           A.10.HIS*A.11.SERASP
3tlqA            A.176.ARG*A.209.GLN
3tlqA            A.4.PHELEU*A.59.GLN
3tlqA         A.172.GLN*A.171.GLNGLN
3tlqA            A.213.PHE*A.183.ARG
3tlqA           A.23.GLN*A.22.GLNGLN
3tlqA            A.37.GLU*A.7.ASNLEU
3tlqA            A.62.SERGLU*A.4.PHE
3tlqA            A.215.PHE*A.186.GLN
3tlqA         A.107.TYRPRO*A.109.PHE
3tlqA      A.223.TRPPRO*A.221.CYSLEU
3tlqA         A.146.ALAGLY*A.148.ASN
3tlqA              A.89.GLN*A.57.HIS
3tlqA             A.100.TYR*A.58.TRP
3tlqA         A.200.GLYILE*A.202.ASP
3tlqA         A.197.ILEALA*A.215.PHE
3tlqA           A.22.GLN*A.21.ASNGLN
4f6mA         A.564.PHEMET*A.559.PHE
4f6mA         A.494.TYR*A.505.CYSLEU
4f6mA         A.520.LYSLYS*A.522.TYR
4f6mA         A.544.HIS*A.526.TYRCYS
4f6mA         A.531.PHE*A.536.TYRARG
4f6mA         A.522.TYR*A.533.LEUALA
4f6mA         A.550.TYR*A.561.ASNTYR
4f6mA         A.503.TYR*A.508.SERLEU
2gu1A           A.80.THRARG*A.87.PHE
2gu1A         A.189.PHE*A.182.PHELEU
2gu1A         A.217.PHE*A.323.VALASP
2gu1A           A.10.TYR*A.11.METVAL
2gu1A         A.185.GLU*A.185.GLUASP
2gu1A             A.156.TYR*A.99.ARG
2gu1A         A.106.GLUILE*A.108.ASN
2gu1A         A.244.PROVAL*A.246.TYR
2gu1A         A.326.METLYS*A.203.ARG
2gu1A         A.313.HIS*A.314.PHEGLU
2gu1A              A.42.HIS*A.89.TYR
2gu1A         A.156.TYR*A.160.HISASN
2gu1A      A.249.GLYASP*A.293.LYSARG
2gu1A         A.233.ASN*A.231.PROHIS
2gu1A         A.148.PHE*A.105.GLYGLU
2gu1A           A.90.ASPPHE*A.89.TYR
2gu1A           A.92.GLNGLU*A.91.PHE
2gu1A              A.33.GLN*A.29.TYR
2gu1A           A.70.HISMET*A.69.TYR
2o4dA              A.75.TRP*A.76.GLN
2o4dA              A.80.TYR*A.67.GLN
2o4dA          A.114.HIS*A.83.PROARG
2o4dA            A.116.ASP*A.119.GLU
2o4dA           A.36.GLU*A.58.ASPALA
2o4dA              A.7.TRP*A.136.PHE
1zmoA            A.215.GLU*A.212.ARG
1zmoA         A.122.ARG*A.118.ILEALA
1zmoA              A.81.TYR*A.11.HIS
1zmoA      A.134.SERSER*A.176.GLYPRO
1zmoA         A.235.PHE*A.236.PHEALA
1zmoA      A.152.ALAALA*B.152.ALAALA
1zmoA         A.137.GLYLYS*A.235.PHE
1zmoA            A.222.PHE*C.222.PHE
1zmoA         A.126.GLYALA*A.226.ARG
1zmoA             A.88.ARG*A.143.TYR
1zmoA            A.178.ASN*A.179.PHE
1zmoA         A.133.THRSER*A.151.ARG
1zmoA           A.31.HIS*A.32.ASPALA
1zmoA              A.48.ASN*A.44.PHE
1zmoA            A.234.GLN*A.236.PHE
1zmoA            A.191.TRP*A.198.ARG
2e7yA           A.16.TYR*A.17.TYRSER
2e7yA          A.79.TYR*A.107.HISPRO
2e7yA         A.150.ARG*A.178.GLUGLU
2e7yA        A.26.ALAGLY*A.53.HISILE
2e7yA         A.130.PHE*A.142.GLYTYR
2e7yA         A.190.ASPSER*A.134.HIS
2e7yA            A.198.GLU*A.130.PHE
2e7yA         A.162.LYSGLU*A.166.ARG
2e7yA              A.92.PHE*B.92.PHE
2e7yA            A.5.GLYPHE*A.14.TRP
2e7yA         A.126.TYR*A.146.PHEGLU
2e7yA             A.6.PHE*A.7.SERLYS
2e7yA         A.153.LYSLYS*A.155.GLU
2e7yA              A.45.PHE*A.78.PHE
2e7yA         A.279.GLUMET*A.278.PHE
2e7yA            A.126.TYR*A.114.ARG
2e7yA           A.39.TYR*A.67.GLYMET
2e7yA         A.107.HIS*A.105.ASNVAL
4q9aA           A.74.PHE*A.69.ASNTHR
4q9aA         A.228.ARG*A.181.GLYALA
4q9aA            A.109.GLN*A.108.TYR
4q9aA         A.212.VALPRO*A.211.PHE
4q9aA            A.190.TYR*A.179.ARG
4q9aA            A.160.TYR*A.111.ARG
4q9aA            A.176.PHE*A.218.PHE
4q9aA           A.88.GLU*A.88.GLUGLY
4q9aA            A.137.HIS*A.133.ASN
1kcqA            A.209.GLU*A.206.ASN
1kcqA         A.188.CYSPHE*A.189.PHE
1kcqA         A.235.GLUGLU*A.200.TRP
1kcqA         A.210.ARG*A.206.ASNARG
1kcqA         A.200.TRP*A.201.CYSGLY
1kcqA            A.189.PHE*A.183.PHE
4lafA           A.28.ARG*A.24.ALAALA
4lafA         A.124.HISGLY*D.128.GLU
4lafA       A.193.GLYLYS*A.26.GLYALA
4lafA          A.86.PHEGLY*C.140.HIS
4lafA              A.39.GLN*A.66.TYR
4lafA           A.10.TYR*A.11.SERSER
4lafA              A.61.PHE*A.17.TYR
4lafA          A.140.HIS*C.86.PHEGLY
4lafA          A.80.PHEGLY*A.117.PHE
4lafA              A.92.GLN*A.10.TYR
3vypA         A.297.ARG*A.296.SERARG
3vypA         A.211.ARGPRO*A.210.TRP
3vypA            A.368.HIS*A.364.TRP
3vypA         A.198.GLYALA*A.210.TRP
3vypA            A.394.TRP*A.211.ARG
3vypA         A.338.ALAPRO*A.340.TRP
3vypA         A.199.ALAPHE*A.210.TRP
3vypA         A.398.TRP*A.212.PROGLU
3vypA         A.144.GLNTHR*A.143.PHE
3vypA      A.194.PROPRO*A.192.THRASN
3vypA         A.322.VALASP*A.300.HIS
3vypA            A.405.ASN*A.201.TYR
3vypA            A.398.TRP*A.213.GLU
3vypA         A.227.ASN*A.225.ALAVAL
3vypA         A.371.ARG*A.295.GLYSER
3vypA         A.401.TRP*A.200.PHETYR
3vypA            A.401.TRP*A.211.ARG
3vypA         A.390.GLYLEU*A.330.TYR
3vypA            A.363.GLN*A.324.TRP
1m7gA         A.203.LYSGLY*A.205.TYR
1m7gA           A.68.GLYLEU*B.89.GLU
1m7gA         A.137.TYR*A.138.VALASP
1m7gA           A.89.GLU*B.68.GLYLEU
1m7gA         A.133.PHE*A.116.ALAARG
1m7gA           A.19.GLU*A.19.GLULEU
1m7gA         A.127.GLUGLU*A.128.GLU
1m7gA            A.137.TYR*A.139.ASP
1m7gA              A.94.PHE*B.94.PHE
1m7gA           A.85.ARG*A.85.ARGARG
1m7gA           A.17.ARG*A.13.THRARG
1m7gA             A.127.GLU*A.24.ARG
1m7gA      A.160.GLYVAL*A.162.ILELYS
1m7gA         A.153.LEUTYR*A.165.PHE
1m7gA              A.75.PHE*A.66.ARG
1m7gA          A.32.GLYLEU*A.172.TYR
1m7gA      A.178.PROGLU*A.180.VALHIS
1m7gA              A.86.ARG*B.86.ARG
1m7gA         A.172.TYR*A.173.GLUALA
3a0sA         A.501.PHE*A.510.GLUGLY
3a0sA         A.484.LEUASN*A.483.PHE
3a0sA         A.501.PHE*A.511.GLYVAL
4p4mA         A.242.TYR*A.243.METGLY
4p4mA         A.312.GLYLEU*A.314.PHE
4p4mA         A.246.GLYARG*A.230.TYR
4p4mA         A.194.ASP*A.195.VALASP
4p4mA            A.230.TYR*A.164.TYR
4p4mA         A.220.HIS*A.216.GLYVAL
4p4mA         A.368.TYR*A.369.ALALYS
4p4mA            A.162.GLU*A.166.ARG
4p4mA            A.139.GLN*A.105.PHE
4p4mA         A.156.GLN*A.156.GLNGLU
4p4mA         A.158.SERVAL*A.185.TYR
2r2oA       A.1808.ARGSER*A.1807.TRP
2r2oA          A.1834.ASN*A.1838.HIS
2r2oA       A.1834.ASN*A.1819.ASPGLU
4iv6A      A.114.GLYGLU*A.116.LEUARG
4iv6A         A.126.GLYGLY*B.267.ARG
4iv6A            A.352.PHE*B.352.PHE
4iv6A         A.351.TYR*A.255.ALAALA
4iv6A        A.60.GLYALA*A.53.ILEPRO
4iv6A       A.75.ALAARG*A.251.GLYVAL
4iv6A            A.191.PHE*A.212.PHE
4iv6A            A.130.ASP*B.270.PHE
4iv6A            A.270.PHE*B.130.ASP
4iv6A         A.192.ASP*A.193.VALSER
4iv6A         A.347.ASPVAL*A.351.TYR
4iv6A         A.349.GLU*A.349.GLUARG
4iv6A           A.30.GLU*A.30.GLUHIS
4iv6A         A.257.PHE*A.287.METGLY
4iv6A         A.339.GLYTYR*B.153.TRP
4iv6A            A.337.HIS*A.263.TYR
4iv6A             A.159.ARG*A.35.TYR
4iv6A         A.153.TRP*B.339.GLYTYR
4iv6A      A.360.VALGLY*A.363.GLYTHR
1a3wA      A.169.ASNALA*A.105.PROASN
1a3wA         A.312.ARGALA*B.264.ARG
1a3wA         A.244.GLNGLN*A.248.ASN
1a3wA            A.415.ARG*A.437.ARG
1a3wA         A.264.ARG*B.312.ARGALA
1a3wA       A.120.ALACYS*A.95.THRTHR
1a3wA            A.201.PHE*A.205.ASN
1a3wA              A.60.HIS*A.52.PHE
1a3wA            A.455.ASP*A.459.ARG
1a3wA           A.41.ARG*A.70.SERGLU
1a3wA         A.425.ARG*A.447.GLUPRO
1a3wA          A.7.LEUTHR*A.9.SERLEU
1a3wA            A.214.PHE*A.242.GLU
1a3wA         A.156.GLU*A.157.VALVAL
1a3wA         A.428.ARGALA*A.432.PHE
1a3wA         A.340.TYR*A.307.ASNPRO
1a3wA         A.127.TYR*A.117.TYRALA
1a3wA           A.56.SERTYR*A.58.GLU
1a3wA            A.320.ASN*B.320.ASN
1a3wA         A.391.PHE*A.361.TYRLEU
1a3wA         A.127.TYR*A.112.THRTHR
1a3wA         A.334.GLU*A.301.LEUGLU
1a3wA          A.418.CYSPRO*A.20.ARG
1a3wA         A.416.PROASN*A.361.TYR
1a3wA         A.477.ASP*A.474.LYSLYS
1a3wA         A.132.ASNILE*A.130.TYR
1v9cA           A.90.ASN*A.88.PHEGLY
1v9cA          A.51.PHESER*A.180.TRP
1v9cA           A.73.ALAARG*A.94.GLU
1v9cA              A.30.TRP*A.23.HIS
1v9cA              A.29.GLU*A.51.PHE
1v9cA             A.98.HIS*A.119.TYR
1v9cA          A.198.HISALA*A.35.ARG
2qyzA             A.123.TYR*A.12.TRP
2qyzA              A.65.GLU*A.55.TYR
2qyzA           A.12.TRP*A.18.METMET
2qyzA           A.12.TRP*A.13.ASPLYS
2qyzA          A.123.TYRGLU*A.12.TRP
2qyzA           A.92.CYSPHE*A.86.TYR
2qyzA           A.29.ILEGLU*A.28.HIS
2qyzA           A.87.GLNASP*A.86.TYR
2qyzA           A.17.ASNMET*A.12.TRP
2qyzA           A.80.ASNLEU*A.82.TYR
3coqA           A.63.ARG*B.82.LYSMET
3coqA           A.63.ARG*A.59.SERARG
3coqA           A.39.ARGTYR*A.12.ASP
3coqA           A.34.ASNASN*A.36.TRP
3pesA           A.21.TRPGLU*A.20.TYR
3pesA           A.42.GLYCYS*A.21.TRP
3pesA              A.52.ARG*A.54.ARG
3pesA           A.25.VALPRO*A.24.TYR
3pesA           A.56.ALAPRO*A.58.TRP
3pesA           A.43.CYSGLY*A.21.TRP
3pesA           A.22.GLUPRO*A.21.TRP
1y43B         B.129.PHE*B.107.TRPILE
1y43B          B.106.GLU*B.12.GLYILE
1y43B           B.41.TRP*B.26.GLYVAL
1y43B          B.108.ILEVAL*B.10.TRP
1y43B         B.105.ALAGLU*B.106.GLU
1y43B            B.7.ALASER*B.29.PHE
1y43B           B.91.THRPHE*B.90.HIS
1y43B          B.104.ASNALA*A.17.TYR
1y43B            B.121.PHE*B.111.ASP
1y43B           B.43.GLU*B.48.TYRALA
1y43B           B.52.PHE*B.88.VALTHR
1y43B           B.41.TRP*B.25.THRGLY
1y43B              B.42.TYR*B.90.HIS
1y43B           B.42.TYR*B.50.TYRASP
1y43B           B.59.GLU*B.59.GLUGLY
1y43B              B.152.GLU*A.3.TYR
1y43B           B.31.TYR*B.32.GLUASP
1y43B           B.40.ALATRP*B.39.ASP
1y43B             B.112.PHE*B.28.ASP
1y43B            B.123.ASP*B.172.TYR
1y43B         B.159.THRGLU*B.150.ASP
1nriA      A.195.LEUTHR*A.193.GLUILE
1nriA         A.125.ALAVAL*A.129.ASP
1nriA           A.81.ARG*A.77.GLYTHR
3oizA         A.387.SERASN*A.419.ASP
3oizA            A.413.PHE*A.443.TRP
3oizA         A.409.GLU*A.409.GLUGLY
3oizA         A.411.GLN*A.410.GLYGLN
1u3eM        M.18.THRGLY*M.83.ASNLEU
1u3eM         M.127.SERPRO*M.129.ASP
1u3eM            M.15.VALSER*M.3.TRP
1u3eM         M.157.LYSGLY*M.159.HIS
1u3eM           M.81.ASPASN*M.83.ASN
1u3eM           M.74.ASP*M.75.HISLYS
1u3eM           M.67.TYR*M.68.GLUGLU
1u3eM         M.168.PHE*M.166.TYRTHR
1u3eM           M.16.SERASN*M.63.PHE
2ivfB          B.53.TRP*B.210.LYSCYS
2ivfB         B.189.HIS*B.187.HISARG
2ivfB         B.198.ALAILE*B.200.TYR
2ivfB            B.130.TRP*A.869.ARG
2ivfB         B.246.HIS*B.339.ASPARG
2ivfB         B.112.HIS*A.926.TYRLYS
2ivfB        B.52.ARGTRP*B.54.ASNASN
2ivfB         B.226.CYSASN*B.235.ARG
2ivfB             B.149.ARG*B.68.TYR
2ivfB          B.146.TYR*B.29.LEUGLY
2ivfB         B.202.ASNPRO*B.201.PHE
2ivfB             B.17.ARG*B.239.TYR
2ivfB         B.108.GLYGLN*B.109.GLN
2ivfB      B.158.ALACYS*B.193.ALACYS
2ivfB             B.188.ARG*C.89.PHE
2ivfB            B.264.TYR*B.261.HIS
2ivfB          B.99.HIS*A.140.ASPGLU
2ivfB           B.34.CYSTHR*B.54.ASN
2ivfB             B.351.GLN*A.74.TRP
2ivfB      B.319.ASNMET*B.325.GLYSER
2ivfB         B.130.TRP*B.125.ALATRP
2ivfB            B.292.ARG*A.285.PHE
2ivfB         B.130.TRP*B.126.TRPGLY
2ivfB            B.188.ARG*B.201.PHE
2ivfB         B.337.TRP*A.123.ASNPRO
2ivfB          B.47.GLYTHR*B.202.ASN
2ivfB         B.139.TRP*A.911.VALGLN
2ivfB            B.189.HIS*C.197.ARG
2ivfB             B.66.ARG*B.126.TRP
2ivfB           B.49.GLUHIS*B.94.ASP
2ivfB      B.336.LYSTRP*B.334.SERLYS
2ivfB         B.143.PHE*B.136.GLYGLY
3aabA             A.111.ARG*A.35.TYR
3aabA           A.83.VALARG*A.82.TYR
3aabA      A.105.ASNGLY*B.105.ASNGLY
3aabA              A.45.PHE*A.66.ARG
4jmfB              B.42.HIS*C.69.GLN
4jmfB           B.55.GLYGLN*B.85.ARG
4jmfB           B.75.ILELEU*B.88.TRP
4jmfB        B.61.ALAASN*C.77.GLYARG
4jmfB           B.50.PHE*B.38.HISLEU
3sx6A           A.40.GLNPHE*A.39.PHE
3sx6A            A.161.PHE*A.193.GLU
3sx6A         A.201.ILEGLN*A.202.GLN
3sx6A            A.165.TYR*A.189.PHE
3sx6A            A.372.GLN*A.352.TRP
3sx6A         A.355.VALALA*A.367.PHE
3sx6A         A.145.ARG*A.141.GLNALA
3sx6A         A.265.LYSGLY*A.282.PHE
3sx6A           A.98.TYR*A.86.GLNASN
3sx6A              A.38.TYR*A.36.ASN
3sx6A              A.92.ASP*A.76.GLN
3sx6A      A.114.VALPRO*A.112.GLUASN
3sx6A            A.137.PHE*A.141.GLN
3sx6A            A.120.HIS*A.135.ARG
3sx6A         A.412.GLU*A.412.GLULYS
3sx6A        A.76.GLNSER*A.34.SERALA
3sx6A      A.312.THRPRO*A.314.VALPRO
3sx6A           A.85.ALAGLN*A.87.ASN
3sx6A               A.3.HIS*A.29.GLU
3sx6A          A.45.ASN*A.129.THRVAL
3sx6A         A.280.GLYGLY*A.282.PHE
3sx6A         A.110.ALAPHE*A.112.GLU
3sx6A           A.73.PHE*A.74.ILEALA
3sx6A         A.352.TRP*A.353.ASNALA
4eo2A         A.488.ILESER*F.356.ARG
4eo2A         A.524.ASN*A.517.ILETHR
4eo2A         A.213.PHEASN*A.212.TRP
4eo2A         A.525.TRP*A.503.PHEGLY
4eo2A           A.38.ASP*A.37.PHEASP
4eo2A         A.231.TRP*A.229.TYRPRO
4eo2A              A.76.TYR*A.14.PHE
4eo2A         A.201.HIS*A.272.GLYVAL
4eo2A      A.563.ILEASN*F.125.ASNASN
4eo2A         A.525.TRP*A.526.VALGLN
4eo2A            A.134.TYR*A.142.ASN
4eo2A            A.259.ASN*A.185.PHE
4eo2A         A.497.LYSLYS*A.501.ASN
4eo2A           A.38.ASPVAL*A.10.TYR
4eo2A      A.341.GLYALA*A.343.LYSASN
4eo2A         A.551.ALAGLY*A.527.GLN
4eo2A         A.553.VALARG*A.525.TRP
4eo2A         A.246.PHEILE*A.275.ASN
4eo2A         A.349.TYR*A.335.ASPSER
4eo2A           A.73.GLYVAL*A.10.TYR
4eo2A             A.68.PHE*A.100.ASP
4eo2A           A.23.PHEASN*A.22.HIS
4eo2A         A.300.ASPLYS*A.302.HIS
4eo2A         A.280.ASN*A.278.ASPPHE
4eo2A         A.552.GLYVAL*A.525.TRP
4eo2A             A.546.ARG*B.15.ASN
4eo2A         A.561.ASPMET*A.556.TRP
4eo2A      A.260.GLYGLY*A.258.VALASN
4eo2A      A.125.ASNASN*B.563.ILEASN
4eo2A         A.231.TRP*A.187.THRALA
4eo2A         A.131.ARG*A.505.TYRGLU
4eo2A         A.147.ARG*A.326.SERLEU
4eo2A            A.487.ARG*A.161.HIS
3orkA          A.4.PROSER*A.6.HISLEU
3orkA         A.227.GLNHIS*A.216.PHE
3orkA            A.124.GLN*A.270.ARG
3orkA         A.275.ARG*A.271.ALAASP
3orkA           A.94.TYR*A.95.VALASP
3orkA         A.156.ASPPHE*A.136.HIS
3orkA            A.283.GLU*A.275.ARG
3orkA           A.92.METGLU*A.75.TYR
3orkA           A.89.TYR*A.78.GLYGLU
3orkA            A.240.HIS*A.241.GLU
3orkA           A.88.PROTYR*A.56.PHE
3orkA           A.75.TYR*A.73.ALAVAL
3orkA              A.32.ARG*A.10.ARG
1j48A           A.29.TYRTYR*A.51.PHE
1j48A              A.29.TYR*A.94.ASN
1j48A          A.106.PHE*A.65.ARGLYS
1rmgA           A.54.TYR*A.55.ILEPRO
1rmgA           A.44.TRP*A.68.LEUTHR
1rmgA         A.399.ALASER*A.117.TYR
1rmgA            A.189.HIS*A.187.TRP
1rmgA            A.351.ARG*A.283.TYR
1rmgA      A.316.PROPRO*A.318.ILEARG
1rmgA         A.341.GLU*A.309.GLUALA
1rmgA            A.390.ASP*A.244.TRP
1rmgA         A.102.GLULEU*A.101.PHE
1rmgA         A.248.GLNMET*A.274.ASN
1rmgA            A.151.PHE*A.177.ASP
1rmgA         A.355.GLYSER*A.362.ASP
1rmgA         A.223.ALAMET*A.250.TYR
1rmgA            A.115.PHE*A.113.GLN
1rmgA            A.217.ASN*A.215.TYR
1rmgA        A.137.HISPHE*A.7.GLYPRO
1rmgA            A.169.ARG*A.395.PHE
1rmgA         A.351.ARGSER*A.369.TYR
1rmgA         A.281.ASP*A.283.TYRTRP
1rmgA         A.284.TRP*A.286.SERMET
1rmgA         A.120.HIS*A.116.GLYTYR
1rmgA         A.377.ALAALA*A.339.TRP
1rmgA      A.294.GLYVAL*A.257.GLYSER
1rmgA            A.162.GLU*A.164.TYR
1rmgA      A.126.GLYALA*A.149.PROALA
1rmgA            A.279.ASP*A.276.TYR
1rmgA            A.269.PHE*A.305.TRP
1rmgA         A.411.TYR*A.240.ASNVAL
1rmgA         A.255.ASN*A.283.TYRTRP
1rmgA            A.102.GLU*A.104.PHE
1rmgA         A.393.THRALA*A.218.TRP
1rmgA         A.125.TYRGLY*A.119.TYR
1rmgA           A.42.SERALA*A.26.TYR
1rmgA         A.190.ASPVAL*A.410.PHE
1rmgA         A.222.CYSALA*A.250.TYR
3ggdA         A.237.PHE*A.238.TRPALA
3ggdA         A.238.TRP*A.215.GLNGLY
3ggdA            A.133.PHE*A.198.PHE
3ggdA           A.45.ASP*A.41.ALAVAL
3ggdA         A.238.TRP*A.216.GLYGLU
3ggdA         A.237.PHE*A.199.THRALA
3ggdA         A.242.LYSHIS*A.210.PHE
3ggdA          A.191.HIS*A.20.GLNTYR
3ggdA          A.93.ALAALA*A.104.TYR
3ggdA             A.40.ARG*A.231.TYR
3ggdA         A.224.HIS*A.225.LYSLEU
3ggdA             A.126.ASN*A.53.PHE
3ggdA         A.123.GLYASP*A.119.HIS
3ggdA             A.48.ARG*A.238.TRP
3ggdA           A.97.ASN*A.67.GLYTHR
3ggdA              A.16.ASP*A.13.ASN
3ggdA              A.76.PHE*A.72.PHE
3ggdA         A.220.PHE*A.221.GLNSER
3ggdA         A.233.THRPRO*A.170.PHE
3ggdA         A.141.ARGGLU*A.206.TYR
3ggdA         A.159.TYR*A.160.LEUILE
3ggdA      A.236.ALAPHE*A.217.GLUGLY
1r5tA      A.120.GLYSER*A.122.ARGSER
1r5tA               A.7.GLU*A.10.GLN
1r5tA              A.56.TYR*D.56.TYR
1r5tA           A.31.HIS*A.29.TYRSER
1r5tA         A.111.PHE*A.112.PROILE
1r5tA        A.53.ASNALA*A.55.SERTYR
1r5tA           A.29.TYR*A.53.ASNALA
1r5tA        A.97.GLYVAL*B.97.GLYVAL
1ro5A         A.154.ARG*A.150.LYSMET
1ro5A         A.181.ASN*A.179.GLULEU
1ro5A             A.105.PHE*A.69.TRP
1ro5A           A.46.TYR*A.78.TYRMET
1ro5A             A.100.TRP*A.52.TYR
1ro5A           A.42.GLU*A.42.GLUILE
2b5eA            A.118.ASN*A.115.ASP
2b5eA      A.167.GLYLYS*A.195.ASNALA
2b5eA          A.105.PHE*A.57.PHEALA
2b5eA         A.124.GLYPRO*A.122.TYR
2b5eA            A.152.TYR*A.156.GLU
2b5eA         A.450.TYR*A.402.TYRALA
2b5eA            A.429.ASP*A.486.PHE
2b5eA            A.165.GLN*A.177.PHE
2b5eA         A.402.TYR*A.435.LEUASP
2b5eA      A.143.VALALA*A.141.PROALA
2b5eA         A.264.TYR*A.293.ILEASP
2b5eA              A.49.HIS*A.45.TYR
2b5eA         A.477.PHE*A.490.GLYLYS
2b5eA            A.478.ASP*A.482.GLU
2b5eA            A.134.PHE*A.138.GLN
2b5eA         A.309.GLUGLN*A.311.PHE
2b5eA           A.60.TRP*A.58.ALAPRO
2b5eA         A.200.PHE*A.201.LYSLEU
2b5eA            A.241.PHE*A.277.PHE
2b5eA           A.26.ALAVAL*A.57.PHE
2b5eA         A.467.TYR*A.468.GLNGLY
2b5eA            A.335.PHE*A.310.GLN
2b5eA         A.190.PHE*A.180.METALA
2b5eA              A.87.GLN*A.57.PHE
2b5eA         A.217.ASNGLY*A.216.TYR
2b5eA         A.292.SERILE*A.243.GLU
3flpA          A.19.PHE*A.153.PHEGLU
3flpA       A.33.GLNLEU*A.171.GLUALA
3flpA         A.151.GLYGLY*A.153.PHE
3flpA         A.160.SERGLY*A.159.TRP
3flpA              A.26.GLN*N.26.GLN
3flpA              A.5.ARG*A.190.ARG
3flpA              A.43.PHE*C.32.ARG
3flpA         A.107.SERGLY*A.106.TRP
3flpA         A.132.HIS*A.133.GLNILE
3flpA             A.132.HIS*A.81.ASN
3flpA      A.203.ALAASP*B.203.ALAASP
3flpA          A.101.HIS*A.38.GLNARG
3flpA         A.145.GLU*A.145.GLUGLN
3flpA              A.32.ARG*M.43.PHE
3flpA           A.81.ASNALA*A.58.GLN
4d5tA            A.105.ASN*A.108.ASN
4d5tA         A.147.ARG*A.143.LYSGLN
4d5tA        A.49.ASNPHE*A.54.ARGSER
4d5tA         A.136.ARG*A.135.SERARG
4d5tA            A.125.PHE*A.122.ASN
3f9sA           A.46.GLU*A.40.ASPPRO
3f9sA          A.41.PROGLY*A.131.ARG
3f9sA          A.111.GLYALA*A.87.TRP
3f9sA          A.101.PROSER*A.93.HIS
3f9sA           A.90.THRALA*A.89.TRP
3f9sA          A.121.ARG*A.29.LYSTYR
3f9sA           A.75.GLYLEU*A.77.PHE
3f9sA           A.21.GLUGLY*A.63.ARG
3f9sA          A.110.SERGLY*A.87.TRP
3f9sA        A.117.PHEASP*A.2.SERILE
3f9sA          A.123.THRGLY*A.35.TYR
3f9sA            A.135.TYR*A.139.ARG
3f9sA           A.35.TYR*A.36.THRVAL
3f9sA             A.39.HIS*A.126.TRP
3r3hA         A.189.GLU*A.147.THRASN
3r3hA              A.70.PHE*A.66.GLU
3r3hA         A.101.ALAHIS*A.105.TRP
3r3hA         A.139.PHE*A.140.ILEPHE
3r3hA         A.152.TYR*A.148.ASNTYR
3r3hA             A.204.PHE*B.57.ARG
3r3hA            A.169.ASP*A.170.ASN
3r3hA         A.142.ILEASP*A.141.PHE
3r3hA          A.79.SERLEU*A.110.GLN
3r3hA           A.70.PHE*A.68.GLYTHR
3r3hA           A.45.ALAPRO*A.47.GLU
3r3hA             A.57.ARG*B.204.PHE
3r3hA         A.136.GLN*A.132.GLYGLY
3r3hA      A.172.PHETRP*A.170.ASNILE
3r3hA           A.53.GLNMET*A.57.ARG
1ua4A         A.341.PHE*A.342.HISTHR
1ua4A          A.97.ARG*A.202.ALAASP
1ua4A         A.404.ARG*A.404.ARGALA
1ua4A         A.264.HIS*A.265.LEUGLU
1ua4A      A.300.METGLU*A.305.GLULYS
1ua4A             A.32.ASN*A.176.HIS
1ua4A          A.85.LYSALA*A.196.ASN
1ua4A            A.252.ASN*A.219.PHE
1ua4A             A.47.ARG*A.103.TRP
1ua4A         A.132.HIS*A.133.VALPRO
1ua4A          A.76.SERILE*A.198.PHE
1ua4A           A.90.PHE*A.91.VALGLU
1ua4A             A.45.GLU*A.188.PHE
1ua4A         A.211.ILEARG*A.210.PHE
1ua4A         A.199.ILEGLY*A.198.PHE
1ua4A            A.190.PHE*A.189.GLU
1ua4A            A.295.GLU*A.292.ASN
1ua4A             A.190.PHE*A.82.ARG
1ua4A         A.186.ARGVAL*A.185.PHE
1ua4A         A.342.HIS*A.291.LEUASN
1ua4A         A.264.HIS*A.288.SERVAL
1ua4A          A.32.ASN*A.111.GLYGLY
1ua4A         A.196.ASNARG*A.181.PHE
1ua4A         A.424.ILEPRO*A.423.PHE
1ua4A         A.179.TYR*A.177.TYRILE
1ua4A            A.135.GLN*A.205.TYR
1ua4A              A.79.TRP*A.83.ARG
1vzjA              A.28.PHE*A.24.TRP
1vzjA            A.24.TRP*I.2.LEUTHR
1vzjA            A.17.TRP*I.6.PROPRO
1y8qB           B.64.GLN*B.63.PHEGLN
1y8qB            B.197.PHE*B.249.TYR
1y8qB            B.521.ASP*B.524.GLN
1y8qB         B.128.METCYS*B.106.PHE
1y8qB         B.535.SERGLU*B.534.HIS
1y8qB         B.521.ASP*B.477.ALAPRO
1y8qB             B.53.ASP*B.347.ASP
1y8qB            B.123.ASN*B.160.GLU
1y8qB         B.249.TYR*B.244.ALALYS
1y8qB      B.392.ALAVAL*A.304.ALAVAL
1y8qB            B.209.ASP*B.176.ARG
1y8qB          B.27.GLYILE*B.391.ASN
1y8qB         B.123.ASN*B.119.ARGALA
1y8qB            B.284.TRP*B.288.GLN
1y8qB         B.527.THRLEU*B.526.TYR
1y8qB         B.344.TRP*B.345.ASPLYS
1y8qB             B.374.PHE*A.24.ARG
1y8qB            B.159.TYR*B.138.GLU
1y8qB      B.156.THRGLU*B.436.PROPRO
1y8qB      B.269.METASP*B.267.LEUTHR
1y8qB      B.199.GLUGLU*B.194.ASNGLN
1y8qB         B.277.LYSPRO*B.273.TRP
1y8qB         B.409.LYSILE*B.411.ASP
1y8qB         B.419.ASN*B.417.PHELEU
3clhA         A.114.PHE*A.115.ILEASN
3clhA             A.139.TYR*B.79.PHE
3clhA             A.154.TYR*A.16.PHE
3clhA      A.269.LEUTHR*A.267.GLYMET
3clhA           A.67.ASN*A.65.TYRLYS
3clhA              A.48.ARG*A.44.TYR
3clhA         A.233.PHE*A.258.METALA
3clhA         A.103.PHE*A.144.ILEGLY
3clhA      A.322.GLYALA*A.181.CYSPHE
3clhA             A.79.PHE*B.139.TYR
3clhA              A.68.PHE*B.68.PHE
3clhA         A.238.GLULYS*A.243.TYR
3clhA         A.105.SERSER*A.148.HIS
1nslA            A.158.ASP*A.166.HIS
1nslA             A.161.TYR*D.92.ARG
1nslA         A.122.PHE*A.175.LEULYS
1nslA         A.124.GLU*A.123.GLUGLU
1nslA            A.128.ASN*D.166.HIS
1c8nA            A.235.GLN*A.236.PHE
1c8nA            A.233.GLN*A.225.PHE
1c8nA         A.167.GLYSER*A.107.TYR
1c8nA      A.251.VALALA*A.249.PROALA
1c8nA         A.132.TRP*A.217.TYRSER
1c8nA            A.133.ARG*A.216.TRP
1c8nA            A.159.TYR*B.268.GLU
1c8nA            A.268.GLU*C.159.TYR
1c8nA            A.231.PHE*B.232.ASP
1c8nA         A.168.SERARG*A.107.TYR
1c8nA         A.153.VALALA*A.181.PHE
1c8nA         A.142.SERPRO*A.141.TYR
1c8nA      A.104.ALALEU*A.248.GLYPRO
1c8nA         A.129.TYR*A.266.LEUILE
1c8nA         A.107.TYR*A.108.THRVAL
1r0mA            A.226.ASP*A.225.TRP
1r0mA            A.220.GLU*A.195.ASP
1r0mA         A.300.GLU*A.298.METLEU
1r0mA            A.267.ASN*A.245.ASP
1r0mA          A.97.LEUGLY*A.107.ARG
1r0mA         A.215.ASP*A.213.GLUTYR
1r0mA            A.362.PHE*A.332.ARG
1r0mA         A.245.ASPGLU*A.272.ARG
1r0mA         A.258.LEUALA*A.289.PHE
1r0mA              A.35.HIS*A.19.ARG
1r0mA            A.225.TRP*C.101.ARG
1r0mA           A.75.ARG*A.71.LEUASP
1r0mA            A.245.ASP*A.246.GLU
1r0mA            A.267.ASN*A.294.TRP
1r0mA         A.281.ARG*A.277.ALAGLU
3atsA         A.376.GLUGLU*A.377.GLU
3atsA         A.221.PROLEU*A.225.ARG
3atsA            A.233.HIS*A.229.TRP
3atsA         A.120.GLU*A.120.GLUTHR
3atsA            A.378.HIS*A.327.HIS
3atsA            A.332.TYR*A.328.TRP
3atsA         A.161.ARGGLN*A.260.PHE
3atsA            A.227.PHE*A.207.ARG
3atsA      A.145.METPRO*A.143.ASPVAL
3atsA            A.196.ASP*A.200.HIS
3atsA            A.337.TRP*A.282.TRP
3atsA         A.237.ASPALA*A.241.ARG
3atsA          A.98.GLN*A.268.TRPGLU
3atsA         A.124.ASP*A.122.THRGLY
3atsA              A.97.HIS*A.94.ARG
3atsA         A.234.TRPPRO*A.236.ASP
3atsA             A.30.TRP*A.118.TRP
3atsA         A.188.PHE*A.186.PHESER
3atsA         A.302.LEUPRO*A.291.GLN
3atsA         A.136.VALGLU*A.135.TYR
3atsA           A.70.ARGSER*A.66.GLN
3atsA         A.329.PHE*A.277.GLULEU
3atsA         A.197.THRTHR*A.201.ARG
3atsA          A.90.PHEPRO*A.212.PHE
3atsA      A.357.PROASP*A.359.ASPVAL
3atsA         A.326.LEUHIS*A.330.TYR
1ex9A            A.253.ASP*A.250.ASN
1ex9A         A.136.ASN*A.153.GLNASN
1ex9A              A.3.TYR*A.278.ASN
1ex9A           A.14.HIS*A.18.GLYPHE
1ex9A           A.90.TYR*A.57.GLYGLU
1ex9A       A.157.GLYSER*A.51.ASPTHR
1ex9A             A.251.HIS*A.81.HIS
1ex9A            A.116.ASP*A.119.ARG
1ex9A        A.80.GLYHIS*A.84.GLYGLY
1ex9A         A.212.ASP*A.206.ASNPHE
1ex9A           A.21.ASN*A.25.VALASP
1ex9A            A.222.PHE*A.228.ASN
1ex9A      A.245.ASPASN*A.199.SERGLY
1ex9A        A.28.TRPPHE*A.26.ASPTYR
1ex9A         A.195.TYR*A.176.GLNGLY
1ex9A            A.113.ASP*A.222.PHE
1ex9A          A.29.PHE*A.259.PHEGLY
1ex9A         A.165.GLU*A.165.GLUGLY
3szpA             A.94.ARG*A.138.TRP
3szpA          A.88.GLYALA*A.276.GLU
3szpA         A.121.HIS*A.119.ASPILE
3szpA         A.224.ARG*A.224.ARGSER
3szpA            A.244.PHE*A.243.GLU
3szpA           A.72.LEUGLU*A.10.ARG
3szpA         A.288.TYR*A.289.HISLEU
3szpA         A.185.GLN*A.184.HISGLN
3szpA           A.73.GLU*A.69.SERPRO
3szpA            A.224.ARG*A.244.PHE
3szpA      A.215.PHEGLN*A.213.GLYARG
3szpA         A.216.GLNALA*A.215.PHE
3szpA      A.250.LEUVAL*A.248.GLYSER
3szpA         A.279.ARG*A.275.PROGLU
3szpA         A.129.GLNALA*A.128.ASN
3szpA            A.170.TYR*A.174.HIS
1k3xA            A.231.HIS*A.230.PHE
1k3xA         A.255.TYRTRP*A.254.PHE
1k3xA           A.27.PHEALA*A.26.TRP
1k3xA         A.224.LEUPHE*A.207.PHE
1k3xA           A.2.GLU*A.167.GLYASN
1k3xA           A.72.GLYVAL*A.68.ASN
1k3xA            A.239.ARG*A.176.TRP
1k3xA              A.2.GLU*A.169.TYR
1k3xA           A.66.SERHIS*A.65.TYR
1k3xA         A.123.GLN*A.123.GLNARG
1k3xA           A.67.HIS*A.52.LYSALA
1k3xA         A.199.HISALA*A.203.GLU
1k3xA           A.8.ARG*A.212.ARGGLY
1k3xA         A.262.HIS*A.260.CYSGLN
1k3xA         A.153.PHE*A.184.HISLYS
1k3xA              A.46.HIS*A.57.HIS
1k3xA             A.119.HIS*A.65.TYR
1k3xA         A.226.ARGPHE*A.225.PHE
3uenA         A.711.TRP*A.680.VALARG
3uenA            A.735.HIS*A.732.ASP
3uenA         A.719.ALATRP*A.736.PHE
3uenA         A.577.GLU*A.573.ASNILE
3uenA            A.700.ARG*A.739.GLU
3uenA      A.646.LEUGLU*A.672.GLYALA
3a1gB          B.26.ASP*A.710.GLYILE
3a1gB              B.3.ARG*A.699.PHE
3a1gB                B.9.ASN*D.8.ARG
1cpqA          A.31.PHE*A.103.ASPGLY
1cpqA           A.31.PHE*A.32.ASPALA
1cpqA              A.10.ARG*A.55.PHE
4rsiA            A.491.TYR*B.873.HIS
4rsiA         A.510.ASNTYR*A.509.PHE
4rsiA         A.586.THRARG*A.585.TYR
4rsiA            A.687.GLN*A.683.TYR
4rsiA         A.667.GLYGLY*B.738.TYR
4rsiA         A.553.PHE*A.506.ASNLEU
4rsiA         A.519.GLUALA*A.518.PHE
4rsiA         A.532.GLN*A.613.ARGPHE
4rsiA      A.574.LYSARG*B.824.GLYGLY
4rsiA         A.472.ASPPRO*A.471.PHE
2apoA          A.98.THRILE*A.102.TRP
2apoA         A.322.TYR*A.296.ALAVAL
2apoA            A.246.ARG*A.243.TYR
2apoA          A.328.TYR*A.30.TYRGLY
4nooB             B.50.GLU*A.842.ASP
4nooB             B.79.HIS*A.843.TYR
4nooB           B.50.GLUTHR*B.54.ARG
4nooB       B.89.GLYGLY*A.943.PHEGLY
3cedA            A.264.TYR*A.321.PHE
3cedA         A.316.ILESER*A.315.TYR
3cedA         A.312.HIS*A.313.ILEPRO
4rg9A         A.580.GLYASN*A.596.PHE
4rg9A           A.53.LYSALA*A.55.TYR
4rg9A         A.596.PHE*A.612.LEULEU
4rg9A            A.641.TYR*A.671.ASN
4rg9A      A.484.SERTYR*A.482.LEUCYS
4rg9A      A.663.HISPHE*A.644.TRPTYR
4rg9A             A.149.TRP*B.26.PHE
4rg9A         A.598.ARGALA*A.576.TRP
4rg9A            A.641.TYR*A.642.ASN
4rg9A            A.506.TRP*A.510.GLN
4rg9A      A.629.CYSPHE*A.610.TYRTHR
4rg9A         A.765.ASN*A.749.ILEGLY
4rg9A           A.21.TYR*A.50.ARGSER
4rg9A           A.30.ARG*A.29.GLUARG
4rg9A            A.136.GLU*A.103.HIS
4rg9A             A.116.PHE*B.18.HIS
4rg9A             A.18.HIS*B.116.PHE
4rg9A            A.109.GLU*A.110.PHE
4rg9A         A.630.PHE*A.646.GLYLEU
4rg9A         A.545.TYR*A.528.PHESER
4rg9A         A.674.SERSER*A.645.TYR
4rg9A            A.537.TYR*A.535.GLU
4rg9A           A.21.TYR*A.19.TYRALA
4rg9A         A.515.TYR*A.523.GLNALA
4rg9A           A.17.ASNHIS*A.19.TYR
4rg9A         A.640.HIS*A.607.ALATYR
4rg9A             A.26.PHE*B.149.TRP
4rg9A      A.118.LEUSER*A.137.CYSTYR
3fzeA         A.653.ASNTYR*A.682.GLN
3fzeA         A.684.SERPRO*A.683.PHE
3fzeA         A.712.GLUALA*A.719.PHE
3fzeA         A.658.TYRGLY*A.646.PHE
3fzeA         A.659.GLYSER*A.645.GLN
3fzeA         A.742.TYR*A.757.ALASER
3fzeA         A.667.SERLEU*A.631.TYR
3ougA              A.72.ASN*A.22.TYR
3ougA           A.70.ALALEU*A.72.ASN
3ougA              A.48.ASN*A.51.ASN
3ougA           A.77.ARG*C.50.ASNASN
3ougA           A.50.ASNASN*B.77.ARG
3ougA        A.50.ASNASN*H.50.ASNASN
4fwiB         B.313.HISVAL*B.305.TRP
4fwiB         B.290.ARG*B.273.GLYASP
4fwiB         B.138.ARG*B.134.SERGLU
4fwiB            B.293.TYR*B.292.GLU
4fwiB         B.252.ARGGLY*B.256.ASN
4fwiB         B.314.VALALA*B.305.TRP
4fwiB         B.107.METLYS*B.151.TYR
4fwiB         B.287.PHE*B.290.ARGCYS
4fwiB             B.120.HIS*B.89.TRP
4fwiB         B.290.ARG*B.274.ASPPRO
4fwiB            B.128.GLU*B.124.TRP
4hjhA      A.198.GLYVAL*A.172.LEUASN
4hjhA         A.264.GLYALA*A.321.PHE
4hjhA            A.373.TYR*A.289.ARG
4hjhA            A.375.PHE*A.283.ASN
4hjhA         A.258.VALARG*A.257.PHE
4hjhA         A.211.VALPRO*A.210.PHE
4hjhA         A.322.GLUALA*A.324.ASN
4hjhA          A.154.ALAALA*A.90.TYR
4hjhA            A.302.TYR*A.297.ARG
4hjhA         A.378.ALALEU*A.259.ARG
4hjhA         A.447.TYR*A.445.ARGCYS
4hjhA      A.347.ASPALA*A.246.ASPARG
4hjhA             A.440.ASN*A.14.ARG
4hjhA             A.134.TYR*A.28.TYR
4hjhA          A.159.TYR*A.85.PROALA
4hjhA          A.26.TYR*A.142.ALAALA
4hjhA         A.468.ARG*A.468.ARGLYS
4hjhA         A.376.ARG*A.449.GLUSER
4hjhA           A.80.GLYVAL*A.52.ARG
4hjhA            A.187.ARG*A.206.ARG
4hjhA            A.426.PHE*A.416.ARG
4hjhA           A.72.ALAGLY*A.74.PHE
4hjhA         A.404.ARG*A.400.ASPALA
4hjhA            A.126.ASP*A.123.ASP
2tgiA           A.97.LYSILE*A.90.TYR
2tgiA           A.22.ILEASP*A.21.TYR
2tgiA           A.39.TYRASN*A.21.TYR
2tgiA             A.1.ALALEU*A.3.ASP
2tgiA           A.38.GLYTYR*A.21.TYR
2tgiA           A.40.ASNALA*A.39.TYR
2tgiA           A.43.PHE*A.18.ARGPRO
2tgiA           A.40.ASNALA*A.42.ASN
4cgwA         A.301.ALAILE*A.305.TYR
4cgwA            A.362.PHE*A.332.TYR
4cgwA      A.360.ARGTHR*A.365.LYSLEU
4cgwA            A.356.ARG*A.360.ARG
4cgwA         A.300.ARGALA*A.292.PHE
4cgwA      A.304.CYSTYR*A.285.GLULYS
4cgwA      A.372.ASPPHE*A.353.PHEALA
4cgwA      A.319.PROALA*A.338.ASPCYS
4cgwA         A.330.GLNLYS*A.332.TYR
2aujD         D.403.PHE*D.442.ASNVAL
2aujD         D.230.TRP*D.231.VALGLU
2aujD         D.401.TYR*D.399.ARGVAL
2aujD            D.169.TYR*D.198.ARG
2aujD         D.249.TYR*D.250.LEUPHE
2aujD         D.433.GLYARG*D.414.ARG
2aujD         D.353.VALILE*D.352.ASN
2aujD      D.416.ALAPRO*D.431.ILETYR
2aujD            D.210.ARG*D.388.HIS
2aujD         D.339.TRP*D.217.ARGLYS
2aujD         D.386.HISLEU*D.388.HIS
2aujD         D.174.GLYVAL*D.389.GLU
2aujD         D.283.PHE*D.284.LEUPRO
3eetA              A.40.GLU*A.36.ARG
3eetA         A.131.ARG*A.114.ALAGLU
3eetA         A.110.HIS*A.111.SERGLU
3eetA            A.6.GLN*A.10.LEUARG
3eetA          A.109.SERHIS*A.-3.PHE
3eetA            A.123.ARG*A.219.GLN
3eetA         A.231.THRALA*A.230.GLU
3eetA          A.94.PHE*A.105.GLYTHR
1cidA           A.94.ASP*A.92.THRLEU
1cidA           A.32.TRP*A.86.SERGLY
1cidA            A.159.TRP*A.135.GLN
1cidA             A.4.THRALA*A.6.TYR
1cidA           A.32.TRP*A.33.LYSALA
1cidA           A.32.TRP*A.85.GLYSER
1cidA        A.62.PROLYS*A.60.SERASN
1cidA           A.17.PHE*A.15.PHESER
1cidA           A.46.PHESER*A.56.GLN
1cidA           A.46.PHE*A.28.GLYGLU
3w08A          A.102.PROALA*B.39.GLN
3w08A           A.99.TRP*A.75.GLYPRO
3w08A           A.91.ASPASN*A.50.TYR
3w08A           A.30.TRP*A.28.PROMET
3w08A          A.47.GLYVAL*A.131.PHE
3w08A            A.218.ARG*A.278.TYR
3w08A           A.64.ARG*A.60.LEUGLN
3w08A         A.259.TYR*A.283.TRPARG
3w08A         A.287.GLU*A.287.GLULYS
3w08A           A.83.HIS*A.84.HISTHR
3w08A            A.132.ARG*A.118.TRP
3w08A         A.280.ILEGLY*A.279.ASN
3w08A            A.123.ARG*A.117.TRP
3w08A          A.154.GLYVAL*A.98.TYR
3w08A         A.220.GLYGLN*A.221.GLN
3w08A            A.35.ASPGLU*A.8.HIS
3w08A            A.303.PHE*A.172.TRP
3w08A         A.123.ARG*A.122.ASPARG
3w08A           A.23.TYR*A.24.GLNPRO
3w08A          A.39.GLN*B.102.PROALA
3w08A             A.30.TRP*A.149.GLN
3w08A         A.293.ALAGLU*A.172.TRP
3w08A         A.291.ARG*A.290.GLUARG
3w08A         A.223.TRP*A.275.ASPVAL
3w08A         A.103.ALAALA*A.107.ARG
3w08A             A.65.HIS*A.117.TRP
3llmA         A.488.PHE*A.453.VALALA
3llmA            A.554.TYR*A.528.ARG
3llmA         A.345.SERASN*A.339.TRP
3llmA            A.339.TRP*A.503.ARG
3llmA         A.374.GLN*A.373.GLUGLN
3llmA            A.424.PHE*A.394.GLU
3llmA         A.424.PHE*A.420.GLNVAL
3llmA         A.332.TRP*A.333.SERPRO
3llmA         A.404.ASNSER*A.538.ARG
3llmA            A.385.ARG*A.423.GLN
3llmA         A.429.PHE*A.437.GLUCYS
3llmA         A.496.ARG*A.492.GLYVAL
3llmA         A.344.SERSER*A.339.TRP
3llmA         A.340.ASNPRO*A.339.TRP
3llmA            A.429.PHE*A.434.ARG
4bmvA         A.154.GLYALA*B.162.PHE
4bmvA      A.251.GLNALA*B.203.GLUVAL
4bmvA         A.178.VALGLN*A.177.TYR
4bmvA         A.244.GLYLEU*B.234.ARG
4bmvA         A.234.ARG*B.244.GLYLEU
4bmvA              A.22.GLU*A.26.ARG
4bmvA              A.40.ARG*E.40.ARG
4bmvA           A.77.ARG*A.73.GLUILE
4bmvA           A.49.ARG*A.45.ALAALA
4bmvA         A.162.PHE*B.154.GLYALA
2jc5A           A.34.VALGLN*A.35.GLN
2jc5A         A.142.ARG*A.102.ARGLEU
2jc5A         A.217.GLYTRP*A.202.TYR
2jc5A         A.203.THRTRP*A.205.TRP
2jc5A              A.89.PHE*A.88.GLU
2jc5A         A.244.PHE*A.242.GLULYS
2jc5A            A.156.ASN*A.162.TRP
2jc5A           A.96.VALARG*A.95.PHE
2jc5A              A.21.TYR*A.52.HIS
2jc5A             A.10.ASN*A.246.ASP
2jc5A             A.23.TYR*A.239.TYR
2jc5A            A.171.PHE*A.176.ARG
2jc5A         A.204.TRP*A.205.TRPSER
2jc5A         A.257.ALAALA*A.256.TYR
2jc5A              A.8.ASN*A.247.HIS
2jc5A          A.19.GLYPHE*A.244.PHE
2r7hA         A.163.ARGALA*B.128.ARG
2r7hA           A.84.TYR*A.68.HISPHE
2r7hA         A.102.ALAPRO*A.104.HIS
2ebyA           A.53.ASNASN*A.55.ASN
3mt0A      A.245.ARGTHR*A.243.VALALA
3mt0A           A.70.TRP*A.73.SERLEU
3mt0A           A.94.HIS*A.95.PHEPRO
3mt0A          A.111.LYSLEU*A.75.HIS
3mt0A           A.82.GLN*A.82.GLNGLN
3mt0A           A.34.HIS*A.35.LEUHIS
3mt0A           A.36.HIS*A.37.LEULEU
3mt0A            A.147.HIS*A.142.ASN
3mt0A            A.245.ARG*A.146.GLU
3mt0A              A.95.PHE*A.93.GLN
3mt0A         A.194.GLUALA*A.198.ARG
3mt0A         A.144.ASPGLY*A.148.ARG
3mt0A           A.36.HIS*A.66.THRASN
3mt0A              A.95.PHE*A.15.GLN
3mt0A          A.83.GLN*A.284.ALASER
3mt0A      A.262.ASPTHR*A.103.ALAILE
3mt0A              A.36.HIS*A.85.GLU
3mt0A         A.210.PHE*A.208.TYRGLY
1af7A            A.113.ARG*A.109.HIS
1af7A         A.151.PHE*A.152.ALASER
1af7A         A.121.SERALA*A.120.TRP
1af7A             A.156.ASP*A.87.ASN
1af7A         A.247.ARG*A.243.ASPILE
1af7A             A.98.ARG*A.231.ASN
1af7A         A.163.ALAARG*A.208.PHE
1af7A              A.37.ARG*A.82.TRP
1af7A              A.47.ARG*A.27.PHE
1af7A            A.259.PHE*A.228.PHE
1af7A         A.221.PROGLY*A.224.PHE
1af7A          A.101.HIS*A.99.GLUALA
1af7A         A.148.TRP*A.137.LEUALA
1af7A         A.117.TYR*A.118.ARGVAL
1af7A            A.148.TRP*A.205.TYR
1af7A         A.274.SERLEU*A.276.ARG
1af7A      A.192.HISGLU*A.189.THRGLY
2e3xB           B.91.TYR*C.46.SERARG
2e3xB         B.111.TYR*B.106.GLULYS
2e3xB          B.114.TRP*C.91.ALALEU
2e3xB            B.115.PHE*B.106.GLU
2e3xB          B.48.ALAGLU*B.112.ARG
2e3xB           B.38.HIS*C.82.SERASP
2e3xB           B.87.SERSER*B.82.GLU
2e3xB             B.17.PHE*B.125.PHE
2e3xB           B.44.SERMET*C.89.TYR
2e3xB           B.77.GLN*B.77.GLNGLU
2e3xB          B.93.LYSLEU*C.108.TRP
2e3xB               B.50.PHE*B.9.TYR
2z8fA             A.49.ARG*A.105.GLN
2z8fA         A.163.ASN*A.294.GLUTRP
2z8fA            A.125.GLN*A.126.TYR
2z8fA         A.316.SERALA*A.108.TYR
2z8fA      A.307.ALAGLY*B.307.ALAGLY
2z8fA            A.371.GLN*A.296.GLN
2z8fA      A.120.LEUGLN*A.321.LEULYS
2z8fA           A.48.HIS*A.78.THRLYS
2z8fA         A.301.GLYASP*A.303.TRP
2z8fA            A.257.TRP*A.256.ARG
2z8fA         A.162.TYRASN*A.295.TRP
2z8fA      A.237.ALATHR*A.304.PHEGLY
2z8fA         A.315.GLYSER*A.108.TYR
2z8fA           A.81.ASPGLY*A.80.PHE
2z8fA         A.161.PHETYR*A.160.TYR
2z8fA      A.196.ILEMET*A.272.GLYTHR
2z8fA         A.126.TYR*A.327.PROLYS
2z8fA            A.340.GLN*A.336.TRP
2z8fA         A.313.ASP*A.206.ASNMET
2z8fA         A.260.SERPHE*A.254.ASN
2z8fA              A.70.HIS*A.66.TRP
2z8fA         A.195.TYR*A.193.GLYLYS
2z8fA         A.162.TYR*A.296.GLNVAL
2z8fA         A.195.TYR*A.251.ALATHR
3pp5A           A.50.THRILE*A.54.ARG
3pp5A           A.14.ARGGLU*A.18.GLU
3pp5A           A.35.GLU*A.35.GLULEU
3zxnA           A.78.PHE*A.79.VALLEU
3zxnA           A.49.ASP*A.81.THRGLY
4dapA            A.188.PHE*A.178.PHE
4dapA         A.228.LYSSER*A.215.TYR
4dapA        A.98.ILESER*A.96.GLUSER
4dapA            A.8.GLNARG*A.53.TYR
4dapA         A.189.SERPRO*A.188.PHE
4dapA           A.20.LEUALA*A.16.TYR
4dapA         A.222.GLU*A.221.ALAGLU
4dapA         A.178.PHEALA*A.177.PHE
4dapA           A.34.HIS*A.35.CYSPRO
4dapA         A.172.GLN*A.171.GLYGLN
4dapA              A.77.PHE*A.71.GLN
4dapA            A.129.ARG*A.104.TYR
4dapA          A.5.PROPRO*A.3.PHESER
4dapA         A.145.GLUGLN*A.187.ARG
1kmoA         A.499.TYR*A.500.HISLEU
1kmoA             A.98.PHE*A.506.ASN
1kmoA         A.411.LEUASN*A.410.TYR
1kmoA            A.109.ARG*A.217.ARG
1kmoA         A.108.ARGARG*A.112.PHE
1kmoA         A.585.GLYLEU*A.558.PHE
1kmoA            A.734.TYR*A.230.GLU
1kmoA            A.271.ASP*A.272.TRP
1kmoA            A.681.PHE*A.713.TYR
1kmoA         A.350.SERGLN*A.351.GLN
1kmoA         A.584.THRGLY*A.558.PHE
1kmoA         A.474.TYR*A.442.SERGLY
1kmoA         A.508.TYR*A.543.GLYTHR
1kmoA         A.611.ALATYR*A.610.TYR
1kmoA         A.223.PHE*A.224.GLYILE
1kmoA         A.334.TRP*A.366.SERGLY
1kmoA         A.417.GLU*A.416.HISGLU
1kmoA            A.150.ARG*A.558.PHE
1kmoA         A.259.GLYTHR*A.258.PHE
1kmoA            A.565.GLN*A.562.PHE
1kmoA         A.655.PHE*A.636.GLYTHR
1kmoA      A.634.HISLYS*A.632.PROLYS
1kmoA         A.734.TYR*A.704.GLYVAL
1kmoA         A.607.TYR*A.638.LEUGLY
1kmoA         A.646.ASNTRP*A.690.TYR
1kmoA         A.508.TYR*A.102.GLYALA
1kmoA         A.266.GLYTHR*A.246.HIS
1kmoA         A.728.GLYGLN*A.272.TRP
1kmoA         A.512.GLUGLY*A.538.ARG
1kmoA         A.450.TYR*A.406.VALGLY
1kmoA            A.380.ARG*A.365.ARG
1kmoA         A.392.SERGLN*A.391.TYR
1kmoA         A.578.ARGGLY*A.619.GLU
1kmoA         A.135.ASN*A.141.HISASP
1kmoA      A.136.ASNGLY*A.139.GLYSER
1kmoA            A.626.ASN*A.665.ASN
1kmoA            A.309.ASP*A.275.HIS
1kmoA            A.374.ARG*A.421.TYR
1kmoA         A.508.TYR*A.542.LEUGLY
1kmoA         A.361.THRGLN*A.360.TYR
1kmoA         A.345.GLNPHE*A.344.TYR
1kmoA         A.467.ARG*A.203.TYRGLY
1kmoA      A.222.ASPPHE*A.220.PROGLN
1kmoA         A.381.ASNTYR*A.383.TRP
1kmoA         A.592.TYR*A.593.ASPLEU
1kmoA      A.572.ASNASP*A.570.GLNTHR
1kmoA         A.408.TYR*A.409.ARGTYR
1kmoA         A.660.PHE*A.665.ASNTHR
1kmoA         A.471.ILEGLU*A.470.HIS
1kmoA         A.385.ARGGLY*A.359.PHE
1kmoA         A.214.PHEVAL*A.213.ASN
1kmoA         A.468.PHE*A.469.GLUHIS
1kmoA         A.354.PHE*A.355.ASNILE
1kmoA            A.333.PHE*A.141.HIS
1kmoA            A.382.TYR*A.171.PHE
1kmoA         A.726.TYR*A.312.GLYGLY
1kmoA            A.323.ARG*A.712.ASP
1kmoA         A.675.THRGLY*A.716.ARG
1kmoA         A.721.ASNASN*A.328.ARG
1kmoA         A.264.TYR*A.265.SERGLY
1kmoA         A.687.ARG*A.113.ALALYS
1kmoA         A.607.TYR*A.639.GLYVAL
1kmoA            A.660.PHE*A.665.ASN
1kmoA         A.566.TYRASP*A.522.GLN
1kmoA         A.691.ASPPHE*A.690.TYR
4gwmA            A.164.GLN*A.211.TYR
4gwmA         A.263.ASPSER*A.261.PHE
4gwmA         A.363.SERALA*A.365.ASP
4gwmA            A.109.TRP*A.115.TYR
4gwmA         A.477.PHE*A.478.HISLEU
4gwmA         A.236.GLYGLN*A.238.ARG
4gwmA            A.338.PHE*A.426.ARG
4gwmA         A.472.ASNALA*A.565.HIS
4gwmA         A.237.GLN*A.237.GLNARG
4gwmA         A.296.GLU*A.296.GLUSER
4gwmA            A.419.ASP*A.418.ASP
4gwmA         A.471.THRASN*A.565.HIS
4gwmA            A.580.TYR*A.433.HIS
4gwmA            A.440.PHE*A.439.GLN
4gwmA            A.344.TYR*A.299.HIS
4gwmA         A.264.SERCYS*A.263.ASP
4gwmA         A.384.SERTRP*A.346.TYR
4gwmA      A.574.ILELYS*A.572.ASPPHE
4gwmA         A.290.GLN*A.290.GLNVAL
4gwmA         A.453.PHETYR*A.461.PHE
4gwmA         A.269.LEUGLU*A.287.ARG
4gwmA         A.124.CYSTRP*A.153.GLU
4gwmA         A.262.METASP*A.261.PHE
4gwmA            A.231.PHE*A.205.TYR
4gwmA         A.346.TYR*A.294.GLYPRO
4gwmA         A.551.PHE*A.543.ALALEU
4gwmA           A.99.ARG*A.95.PHEGLU
4gwmA         A.383.GLYSER*A.346.TYR
4gwmA           A.28.ASPVAL*A.27.PHE
4gwmA         A.404.GLYARG*A.314.PHE
4gwmA            A.551.PHE*A.545.PHE
4gwmA         A.490.TRP*A.534.ASPARG
4gwmA         A.186.HIS*A.184.ARGGLU
4gwmA         A.284.ASP*A.285.TRPGLN
4gwmA            A.137.GLU*A.119.PHE
4gwmA            A.216.PHE*A.187.ASN
4gwmA         A.313.HIS*A.314.PHEASP
4gwmA             A.131.ARG*A.69.TYR
4gwmA            A.516.ARG*A.146.ARG
4gwmA      A.226.THRARG*A.228.ILESER
4gwmA         A.464.TYR*A.465.LEUASN
4gwmA             A.131.ARG*A.59.GLN
4gwmA         A.338.PHEGLN*A.339.GLN
4gwmA         A.277.GLN*A.277.GLNSER
4gwmA          A.77.TYR*A.107.LYSPRO
4gwmA         A.449.TYRSER*A.432.TRP
4gwmA         A.577.ASP*A.436.ASNPHE
4gwmA         A.505.ASN*A.510.GLNARG
4gwmA            A.553.ARG*A.449.TYR
4gwmA         A.476.TYR*A.559.THRSER
4gwmA             A.97.ARG*A.240.ASP
4gwmA         A.298.ASP*A.299.HISSER
4gwmA             A.71.TRP*A.130.ASN
4gwmA            A.254.ASN*B.254.ASN
4gwmA         A.314.PHE*A.315.ASPSER
4gwmA            A.310.PHE*A.287.ARG
4gwmA         A.476.TYR*A.558.GLYTHR
4gwmA         A.120.LYSGLY*A.119.PHE
4gwmA         A.313.HISPHE*A.285.TRP
4gwmA            A.261.PHE*A.509.ARG
4gwmA             A.95.PHE*A.106.PHE
3gfoA               A.4.TYR*A.28.ASN
3gfoA            A.121.ARG*A.159.GLU
3gfoA           A.51.ASN*A.56.LEULYS
3gfoA          A.32.GLYGLU*A.188.GLN
3gfoA         A.181.METLYS*A.208.TYR
3gfoA        A.90.ASPPRO*A.88.PHEGLN
3gfoA           A.14.ASNTYR*A.13.TYR
4jg2A         A.144.LYSGLY*A.138.PHE
4jg2A         A.147.ALACYS*A.136.TYR
4jg2A          A.35.TYR*A.105.THRPRO
4jg2A             A.19.TYR*A.165.ARG
4jg2A           A.98.PHE*A.82.ARGASP
4jg2A           A.35.TYR*A.24.GLUPRO
4jg2A            A.128.TYR*A.157.ARG
4jg2A         A.143.ASNLYS*A.138.PHE
4jg2A        A.93.TYRLYS*A.84.GLYASP
4jg2A           A.7.THRLYS*A.134.ASN
2zjrN         N.102.GLU*N.101.ARGGLU
2zjrN         N.114.ARG*N.114.ARGASN
2zjrN        N.69.ALAARG*N.74.METASN
2zjrN           N.75.ASN*N.76.TYRSER
2zjrN        N.28.ARGSER*N.24.PHETRP
1lnlA            A.302.GLN*A.298.TYR
1lnlA         A.124.PHEASN*A.122.ASN
1lnlA           A.79.ASPALA*A.83.ARG
1lnlA         A.302.GLNLYS*A.307.ARG
1lnlA      A.142.VALASP*A.140.ILEASN
1lnlA         A.125.ASNGLY*A.138.ARG
1lnlA            A.222.TRP*A.226.GLN
1lnlA         A.125.ASN*A.108.ASPGLU
1lnlA         A.183.ALAILE*A.187.TRP
1lnlA         A.402.TYR*A.403.VALPRO
1lnlA         A.323.LEUASP*A.322.HIS
1lnlA            A.223.GLN*A.219.PHE
1lnlA            A.222.TRP*A.173.PHE
1lnlA         A.279.HIS*A.277.HISPHE
1lnlA        A.49.ALAPRO*A.46.LEUCYS
1lnlA         A.338.GLYTYR*A.325.PHE
1lnlA         A.286.GLU*A.289.GLYMET
1lnlA             A.92.TYR*A.217.ARG
1lnlA              A.4.ARG*A.280.TYR
1lnlA           A.84.HIS*A.24.SERLEU
1lnlA         A.336.HIS*A.337.ALAGLY
1lnlA            A.92.TYR*A.5.LYSSER
1lnlA            A.194.TYR*A.134.GLN
4nf2A         A.169.HIS*A.165.ASNASN
4nf2A              A.38.ASN*A.34.TYR
4nf2A         A.138.GLNALA*A.142.ASP
4nf2A            A.210.GLU*A.181.HIS
4nf2A             A.301.GLN*A.64.PHE
4nf2A         A.232.TRP*A.276.GLUGLU
4nf2A         A.151.ASNTHR*A.147.TYR
4nf2A           A.56.HISSER*B.84.GLN
4nf2A          A.59.ARG*A.270.LEUPRO
4nf2A         A.267.LEUHIS*A.228.TYR
4nf2A         A.266.PHE*A.267.LEUHIS
4nf2A         A.161.VALGLY*A.160.TYR
4nf2A         A.268.HIS*A.229.THRASP
4nf2A           A.93.ASPTHR*A.89.GLU
4nf2A         A.232.TRP*A.247.PHEGLN
4nf2A         A.309.PHE*A.103.ASPGLY
4nf2A         A.163.ASP*A.164.GLYASN
4nf2A         A.250.TYR*A.186.THRPRO
4mvtA      A.239.SERARG*A.205.ASPTYR
4mvtA         A.275.TYR*A.273.SERVAL
4mvtA         A.134.PHE*A.358.ASNGLU
4mvtA         A.156.GLUGLU*A.262.TRP
4mvtA         A.301.ARG*A.297.PROASP
4mvtA            A.358.ASN*A.364.TRP
4mvtA            A.295.ARG*A.299.HIS
4mvtA         A.240.ARGPRO*A.205.ASP
4mvtA            A.243.ASN*A.189.GLN
3ka7A            A.312.GLU*A.326.HIS
3ka7A         A.294.GLYHIS*A.315.GLN
3ka7A         A.333.TYR*A.334.VALALA
3ka7A            A.129.ARG*A.183.TYR
3ka7A         A.333.TYR*A.165.LEULYS
3ka7A        A.91.LYSLYS*A.89.PROLEU
3ka7A         A.332.GLNTYR*A.331.HIS
3ka7A             A.87.ARG*A.101.PHE
3ka7A           A.22.ALAGLY*A.24.HIS
3ka7A      A.377.ASNARG*A.379.ALAALA
3ka7A         A.132.ARG*A.176.PHEGLU
3hf7A         A.212.ASN*A.210.PROARG
3hf7A         A.241.TYR*A.217.ILEASP
3hf7A         A.284.GLU*A.284.GLUGLY
3hf7A         A.324.GLU*A.324.GLUILE
3hf7A         A.268.THRLYS*A.223.TRP
3hf7A            A.307.ASP*A.308.GLU
2hydA      A.322.TYRASP*A.324.ILELYS
2hydA         A.291.PHE*A.258.GLYPRO
2hydA         A.464.PROGLN*A.465.GLN
2hydA        A.41.ILEASP*A.39.TYRALA
2hydA         A.193.SERGLN*A.313.ARG
2hydA         A.191.GLU*A.187.LYSLEU
2hydA         A.508.LEUASP*B.534.HIS
2hydA            A.295.ARG*A.252.ASN
2hydA            A.115.ASN*A.111.PHE
2hydA         A.348.GLNTYR*A.347.PHE
2hydA         A.116.GLN*A.201.GLYPHE
2hydA            A.482.GLN*A.459.PHE
2hydA         A.252.ASNTHR*A.256.ASP
2hydA            A.101.TYR*A.105.GLN
2hydA         A.484.GLN*A.504.ALATHR
2hydA         A.492.PHE*A.453.METALA
2hydA      A.421.GLNGLN*A.423.ASPASN
2hydA            A.101.TYR*B.226.PHE
2hydA           A.48.HIS*A.46.ASNASN
2hydA            A.226.PHE*B.101.TYR
2hydA         A.388.PROARG*A.390.PHE
2hydA         A.190.ARG*A.186.ARGLYS
2hydA            A.474.ARG*B.474.ARG
2hydA         A.225.ASNPHE*A.202.PHE
2hydA         A.534.HIS*B.508.LEUASP
2hydA         A.424.ASN*A.422.GLNASP
2ek5A           A.67.PHE*A.26.GLNARG
2ek5A           A.67.PHEVAL*A.59.TYR
2ek5A        A.22.LEUSER*A.20.GLYTHR
3g43E       E.1673.GLNGLU*E.1677.ARG
3g43E         E.1611.PHE*D.75.LYSMET
1d5yA             A.4.ALAGLY*A.8.ARG
1d5yA         A.198.TYR*A.180.GLYLEU
1d5yA         A.195.GLUVAL*A.197.PHE
1d5yA         A.124.THRMET*A.123.PHE
1d5yA         A.230.GLUGLY*A.229.TYR
1d5yA          A.98.GLN*A.102.LEUTYR
1d5yA         A.235.GLYVAL*A.229.TYR
1d5yA         A.163.PHE*A.200.THRALA
1d5yA         A.115.ARG*A.115.ARGPRO
1d5yA              A.96.PHE*A.92.PHE
1d5yA            A.265.TYR*A.280.ARG
1d5yA            A.123.PHE*A.119.ARG
1d5yA          A.96.PHE*A.113.GLYILE
1d5yA           A.80.TYR*A.61.LYSSER
1d5yA           A.40.ARG*A.36.TRPHIS
1d5yA            A.161.TYR*A.165.HIS
1d5yA            A.160.ARG*A.264.TYR
1d5yA         A.239.PHE*A.228.THRTYR
1d5yA           A.90.ARG*A.86.GLNTHR
1d5yA              A.96.PHE*A.95.GLN
1d5yA              A.17.HIS*A.13.TRP
2xmfA             A.8.TYR*A.9.ASPALA
2xmfA              A.29.GLU*A.35.TRP
2xmfA           A.33.GLYTRP*A.35.TRP
2xmfA           A.46.PHE*A.35.TRPTHR
4hl2A            A.227.GLU*A.228.HIS
4hl2A         A.229.TYR*A.188.GLYHIS
4hl2A             A.104.TRP*A.51.PHE
4hl2A         A.147.GLN*B.166.ASNGLY
4hl2A            A.158.GLN*A.133.HIS
4hl2A           A.57.ASNVAL*A.59.TRP
4hl2A         A.189.HIS*A.208.CYSLEU
4hl2A         A.256.ARG*A.241.PROLYS
4hl2A           A.71.GLYALA*A.66.ASP
4hl2A           A.77.GLYLEU*A.61.HIS
4hl2A         A.261.HIS*A.213.SERLYS
4hl2A         A.166.ASNGLY*B.147.GLN
4hl2A           A.93.TRP*A.64.TYRLEU
4hl2A         A.186.GLYPRO*A.184.TYR
4hl2A         A.167.GLYTRP*A.183.PHE
4hl2A            A.159.HIS*A.140.TYR
4hl2A         A.183.PHE*A.184.TYRPRO
4hl2A              A.76.ASN*A.60.GLN
4ml7B          B.82.GLYSER*A.109.TRP
4ml7B           B.84.GLYALA*A.46.ASN
4ml7B            B.105.ASN*B.108.ASP
4ml7B        B.60.GLYASP*A.71.PROGLY
3wu2C         C.269.GLU*C.447.ARGALA
3wu2C             C.28.GLN*D.233.ARG
3wu2C            C.443.TRP*A.142.TRP
3wu2C           C.26.ARGASP*C.41.ARG
3wu2C         C.427.ALATHR*A.295.PHE
3wu2C         C.271.TYR*C.267.SERGLY
3wu2C          C.219.GLYGLY*A.92.HIS
3wu2C           C.76.ILEPRO*C.75.PHE
3wu2C           C.33.PHE*C.40.ALAARG
3wu2C           C.27.ASPGLN*C.41.ARG
3wu2C      C.251.HISILE*C.158.THRTHR
3wu2C         C.186.TYR*C.195.ASPVAL
3wu2C         C.314.ALAMET*C.351.PHE
3wu2C         C.311.GLN*C.358.PHETRP
3wu2C         C.434.ALAPHE*C.284.PHE
3wu2C            C.461.ARG*D.223.PHE
3wu2C             C.218.PHE*A.93.PHE
3wu2C         C.187.ASPTHR*C.186.TYR
3wu2C         C.258.GLYTRP*C.262.ARG
3wu2C         C.270.ALATYR*C.274.TYR
3wu2C         C.420.VALSER*C.419.PHE
3wu2C         C.455.PHE*A.138.GLYMET
3wu2C          C.325.GLYALA*U.98.TYR
3wu2C             C.135.ARG*Z.33.TRP
3wu2C              C.70.PHE*C.74.HIS
3wu2C             C.327.ASN*O.99.ASP
3wu2C         C.361.PHE*C.362.ARGGLY
3wu2C       C.347.GLYGLU*O.16.ALAASN
3wu2C      C.244.CYSILE*C.165.LEUILE
3wu2C         C.363.GLYPRO*C.365.TRP
3wu2C         C.306.GLYPRO*C.358.PHE
3wu2C            C.398.HIS*C.394.GLU
3wu2C      C.295.THRVAL*C.297.TYRPRO
3wu2C          C.453.ALAGLY*I.34.ARG
4j0xA         A.357.LEUTHR*A.359.PHE
4j0xA         A.403.ASP*A.401.SERILE
4j0xA         A.136.PHE*A.134.ARGTYR
4j0xA         A.322.HISASP*A.302.PHE
4j0xA            A.136.PHE*A.537.PHE
4j0xA         A.233.GLUGLY*A.220.TYR
4j0xA            A.342.ARG*B.551.ARG
4j0xA         A.490.GLYSER*A.440.HIS
4j0xA         A.289.ARG*A.333.METGLU
4j0xA         A.312.PHE*A.310.ASNGLN
4j0xA         A.339.VALGLY*A.321.HIS
4j0xA         A.479.TYR*A.480.ALAILE
4j0xA            A.293.ASP*A.310.ASN
4j0xA         A.435.THRGLU*A.434.PHE
4j0xA         A.323.ASPILE*A.302.PHE
4j0xA         A.258.ARG*A.257.ASPARG
4j0xA            A.154.GLU*A.195.GLN
4j0xA            A.411.PHE*A.131.ARG
4j0xA            A.560.ARG*A.149.PHE
4j0xA            A.552.TRP*B.322.HIS
4j0xA         A.565.SERALA*A.564.TYR
4j0xA         A.552.TRP*A.553.ILEALA
4j0xA            A.551.ARG*B.342.ARG
4j0xA         A.296.TYR*A.294.GLNLEU
4j0xA      A.494.GLYSER*A.517.ALALYS
4j0xA            A.322.HIS*B.552.TRP
4j0xA         A.150.THRARG*A.149.PHE
4j0xA         A.163.PHE*A.164.GLNPRO
4j0xA            A.425.TRP*A.413.PHE
4j0xA         A.562.GLYILE*A.149.PHE
2h12A           A.67.ILEASP*A.66.PHE
2h12A         A.367.TYRPRO*A.311.PHE
2h12A         A.431.VALPRO*A.430.TYR
2h12A         A.369.ASN*A.310.GLYPHE
2h12A            A.237.HIS*A.322.ARG
2h12A         A.218.LYSVAL*A.217.TYR
2h12A         A.367.TYR*A.318.ASNPHE
2h12A         A.413.GLN*A.413.GLNARG
2h12A         A.133.ARG*D.134.ARGASP
2h12A           A.56.GLU*A.55.GLYGLU
2h12A         A.346.ASP*A.342.ASPPRO
2h12A         A.217.TYR*A.210.PHEALA
2h12A         A.221.PROVAL*A.225.ARG
2h12A            A.316.TYR*A.320.ASP
2h12A         A.396.ARG*A.236.ASPHIS
2h12A         A.263.GLYILE*A.400.TRP
2h12A         A.268.TRP*A.139.METALA
2h12A         A.341.ASP*A.342.ASPPRO
2h12A            A.200.ASN*A.203.GLU
2h12A         A.128.PHE*B.131.GLYPHE
2h12A         A.424.GLYALA*A.422.TYR
2h12A            A.134.ARG*A.186.TYR
2h12A         A.417.ARG*B.239.GLNASN
2h12A         A.134.ARGASP*D.133.ARG
2h12A         A.388.PHE*A.384.PROTHR
2h12A          A.87.ASNALA*B.430.TYR
2h12A            A.360.TYR*A.364.ARG
2h12A            A.182.TRP*A.192.PHE
2h12A         A.214.SERGLU*C.197.ASN
2h12A            A.107.GLN*A.104.ASN
2h12A            A.373.TYR*A.327.GLN
2h12A         A.239.GLN*A.238.GLUGLN
2h12A         A.197.ASN*E.214.SERGLU
2h12A         A.239.GLNASN*B.417.ARG
2h12A          A.430.TYR*B.87.ASNALA
4jdxA         A.104.LYSALA*A.108.ARG
4jdxA           A.94.PHE*A.92.LEUTHR
4jdxA          A.92.LEUTHR*A.100.GLN
4jdxA           A.22.ARG*A.18.HISALA
4jdxA           A.76.PHE*D.76.PHEVAL
2jheA         A.150.VALVAL*A.149.HIS
2jheA           A.43.PHEALA*A.29.ARG
2jheA           A.12.GLYLEU*A.10.ARG
2jheA         A.132.PHE*A.133.ASNPHE
2jheA           A.78.GLUHIS*B.79.HIS
2jheA                A.4.GLU*A.6.PHE
2jheA         A.147.ASNGLU*A.146.HIS
4gvqA             A.68.ASP*C.208.ARG
4gvqA         A.103.LYSTYR*A.105.PHE
4gvqA            A.125.ARG*A.198.ASP
4gvqA       A.96.GLYTRP*A.118.LYSPRO
4gvqA         A.299.GLYLYS*A.284.GLN
4gvqA         A.129.GLUASP*A.128.TYR
4gvqA             A.208.ARG*B.68.ASP
4gvqA         A.242.TYR*A.243.ASPGLU
4gvqA             A.77.PHE*A.208.ARG
4gvqA              A.23.ARG*C.84.HIS
4gvqA             A.98.GLN*A.273.TYR
4gvqA         A.105.PHEALA*A.104.TYR
4gvqA      A.172.ALASER*A.170.PROTHR
4gvqA            A.261.PHE*A.226.ASN
4gvqA         A.296.TYRVAL*A.298.HIS
4gvqA            A.296.TYR*A.242.TYR
4rv5A            A.324.TYR*A.320.TYR
4rv5A            A.165.TYR*A.368.ASN
4rv5A         A.198.PHEALA*A.229.PHE
4rv5A         A.107.GLU*B.140.PROILE
4rv5A         A.397.TYR*A.304.TYRSER
4rv5A         A.274.GLYALA*A.272.TYR
4rv5A         A.165.TYR*A.146.LYSVAL
4rv5A       A.77.GLYALA*A.335.ALAPHE
4rv5A         A.305.SERPRO*A.304.TYR
4rv5A         A.140.PROILE*B.107.GLU
4rv5A            A.323.GLN*A.324.TYR
4rv5A            A.230.GLN*A.201.ASN
4rv5A         A.374.GLYLYS*A.376.TYR
4g75A         A.289.GLYARG*A.230.TRP
4g75A              A.80.PHE*A.83.TYR
4g75A         A.232.PHE*A.233.ARGGLY
4g75A             A.260.ARG*A.68.TRP
4g75A         A.114.GLNASN*A.116.HIS
4g75A              A.28.ASN*A.22.TYR
4g75A         A.147.ALAPHE*A.243.TYR
4g75A         A.288.SERGLY*A.230.TRP
4g75A              A.54.TRP*A.55.GLU
4g75A              A.83.TYR*A.82.ASN
4g75A      A.125.GLYILE*A.127.PROSER
4g75A             A.131.ARG*A.90.PHE
4g75A         A.151.TYR*A.244.ASPPHE
4g75A            A.116.HIS*A.118.TYR
4g75A           A.36.GLN*A.36.GLNVAL
4g75A           A.21.ASN*A.17.PHESER
4g75A          A.144.PROALA*A.54.TRP
4g75A           A.46.ASPVAL*A.17.PHE
4g75A            A.251.ARG*A.205.TRP
4g75A         A.194.PHE*A.177.GLNPHE
1wehA             A.5.ALAVAL*A.7.PHE
1wehA        A.26.GLYGLU*A.51.GLYVAL
1wehA              A.93.ARG*A.89.GLN
1wehA           A.113.GLULEU*A.7.PHE
1wehA         A.166.ARG*A.162.GLUASP
1wehA              A.71.ARG*A.68.PHE
2j7nA       A.1362.PHE*B.1354.ALAGLY
2j7nA         A.468.PHEPRO*A.426.HIS
2j7nA       A.1354.ALAGLY*B.1362.PHE
2j7nA         A.644.GLU*A.623.ARGPRO
2j7nA        A.923.ILEALA*A.1008.TYR
2j7nA         A.585.ALALYS*A.584.PHE
2j7nA       A.1324.METALA*A.1265.TRP
2j7nA       A.1339.ARGPRO*B.1295.ASP
2j7nA        A.865.ALAGLY*A.1262.TYR
2j7nA       A.1235.GLU*A.1235.GLULYS
2j7nA            A.758.TRP*A.691.ARG
2j7nA         A.440.TYR*A.441.ASPPRO
2j7nA         A.408.TRP*A.438.LEULYS
2j7nA       A.1015.VALCYS*A.1014.TRP
2j7nA          A.1133.ARG*A.1129.TRP
2j7nA        A.857.SERHIS*B.1369.ARG
2j7nA       A.1292.PHE*B.1205.SERTYR
2j7nA            A.939.PHE*A.943.PHE
2j7nA       A.1295.ASP*B.1339.ARGPRO
2j7nA         A.758.TRP*A.714.METSER
2j7nA            A.680.TYR*A.522.GLN
2j7nA         A.477.PHE*A.449.ASPVAL
2j7nA         A.576.VALGLY*A.405.PHE
2j7nA         A.616.ALAGLU*A.615.PHE
2j7nA        A.916.ARGSER*A.1017.TRP
2j7nA       A.1297.GLUMET*A.1327.ARG
2j7nA         A.765.GLN*A.711.VALGLY
2j7nA            A.849.TYR*A.872.GLU
2j7nA        A.1072.SERPHE*A.669.PHE
2j7nA         A.432.GLUASP*A.430.ASP
2j7nA         A.867.LEUPRO*A.863.PHE
2j7nA       A.1210.PHELYS*A.1224.PHE
2j7nA            A.645.PHE*A.649.GLN
2j7nA         A.516.LYSPRO*A.422.ARG
2j7nA           A.1322.TRP*A.890.TYR
2j7nA           A.581.ARG*A.1066.TYR
2j7nA       A.1205.SERTYR*B.1292.PHE
2j7nA       A.1026.VALASN*A.1025.PHE
2j7nA         A.978.PHE*A.979.LYSPRO
2j7nA    A.1006.GLYASP*A.1000.ALALYS
2j7nA       A.1194.ASP*A.1192.THRGLU
2j7nA         A.849.TYR*A.850.SERSER
2j7nA         A.581.ARG*A.570.METGLY
2j7nA         A.766.ARG*A.762.TYRPRO
2j7nA         A.862.PROPHE*A.869.ASP
2j7nA            A.529.ARG*A.530.PHE
2j7nA       A.1301.TRP*A.1269.THRPRO
2j7nA         A.622.PHE*A.618.THRGLY
2j7nA       A.1303.LEULEU*A.1206.TYR
2j7nA       A.1200.ASPPRO*A.1199.TRP
2j7nA       A.1153.TRP*A.1155.GLYARG
2j7nA         A.528.ARG*A.524.CYSARG
2j7nA         A.975.ARG*A.955.ASPCYS
2j7nA           A.1027.ASN*A.972.GLN
2j7nA         A.915.GLYARG*A.945.ASP
2j7nA            A.693.HIS*A.762.TYR
2j7nA       A.1152.SERTRP*A.1168.PHE
2j7nA       A.1290.LEUSER*A.1292.PHE
2j7nA            A.411.GLU*A.440.TYR
2j7nA         A.464.ARG*A.466.LYSPRO
4d1jA         A.421.GLNVAL*A.423.TRP
4d1jA         A.572.TYR*A.525.LYSPHE
4d1jA          A.79.TRP*A.117.GLUALA
4d1jA         A.296.TYR*A.292.LEUPRO
4d1jA         A.549.GLYASP*A.553.ASP
4d1jA         A.381.TYR*A.382.THRASN
4d1jA            A.215.TYR*A.158.GLU
4d1jA         A.504.TYR*A.502.ASNGLU
4d1jA            A.103.GLU*A.144.TRP
4d1jA          A.49.HIS*A.343.ASNALA
4d1jA             A.67.ASN*C.550.ASP
4d1jA            A.304.ASN*A.285.ARG
4d1jA         A.541.TRP*A.534.GLYARG
4d1jA         A.391.TYR*A.377.ASPASP
4d1jA            A.349.GLU*A.322.ASP
4d1jA         A.129.TRP*A.130.PHEALA
4d1jA          A.96.TRP*A.176.ALAASP
4d1jA      A.361.PHEPRO*A.424.GLYVAL
4d1jA      A.487.ASNTHR*A.489.PROALA
4d1jA         A.300.GLYGLY*A.309.TRP
4d1jA         A.347.VALALA*A.346.PHE
4d1jA            A.476.ARG*A.512.ARG
4d1jA            A.223.PHE*A.213.ARG
4d1jA             A.550.ASP*B.67.ASN
4d1jA            A.140.TYR*C.548.ASN
4d1jA         A.404.ARG*A.400.ALAGLN
4d1jA            A.548.ASN*B.140.TYR
4d1jA         A.468.TRP*A.569.METALA
4d1jA         A.354.GLN*A.354.GLNPRO
4d1jA            A.108.PHE*A.187.TYR
4d1jA         A.544.GLU*A.534.GLYARG
4d1jA         A.542.VALMET*A.541.TRP
4d1jA      A.102.VALGLU*A.100.GLUPRO
4d1jA         A.493.GLYALA*A.361.PHE
4d1jA      A.133.TRPLYS*A.131.ALATHR
4d1jA         A.350.ILEGLY*A.324.TYR
4d1jA           A.58.TYR*A.59.ILEILE
4d1jA            A.253.PHE*A.249.ASP
4d1jA          A.70.ASNTYR*A.110.PHE
4d1jA            A.201.GLN*A.281.ASN
4d1jA         A.119.ARG*A.115.LEULYS
4gdxA             A.90.PHE*A.105.ASN
4gdxA         A.124.GLNSER*A.119.PHE
4gdxA         A.257.ARGALA*A.256.TYR
4gdxA           A.94.TYR*A.95.ASNSER
4gdxA         A.293.LEULYS*B.490.TRP
4gdxA          A.38.TYR*B.567.ALAGLY
4gdxA           A.38.TYR*A.36.HISVAL
4gdxA             A.59.ARG*B.569.TYR
4gdxA            A.344.ASN*A.350.PHE
4gdxA            A.349.PHE*A.353.GLN
4gdxA            A.296.TYR*A.315.ARG
4gdxA         A.297.ASN*A.295.GLYTYR
4gdxA            A.368.TYR*A.364.HIS
4gdxA         A.158.GLN*A.158.GLNPRO
4gdxA          A.87.GLYGLY*A.108.GLU
2dt4A           A.60.GLUTYR*A.54.PHE
2dt4A           A.54.PHE*A.55.LEUGLU
2dt4A           A.21.GLU*A.21.GLULEU
2dt4A              A.29.PHE*A.14.PHE
2dt4A            A.128.ARG*A.138.TRP
2dt4A           A.88.VALHIS*A.87.PHE
2dt4A             A.105.HIS*A.61.TYR
2dt4A         A.117.PHE*A.118.LEUGLN
2dt4A          A.91.HIS*A.104.GLYHIS
1kshA           A.81.PHE*A.77.TRPARG
1kshA          A.105.GLULEU*A.89.TRP
1kshA              A.79.ASN*B.96.PHE
1kshA            A.153.ARG*A.171.TRP
1kshA         A.113.GLU*A.113.GLUARG
1kshA           A.22.LEUGLY*A.89.TRP
1kshA             A.50.PHE*B.103.ASN
1kshA           A.90.VALVAL*A.89.TRP
1kshA              A.18.ARG*A.65.TRP
1kshA              A.39.GLU*B.23.ARG
1kshA         A.103.GLN*A.103.GLNARG
4cahB           B.965.TRP*B.1038.ARG
4cahB            B.965.TRP*B.959.ARG
4cahB           B.946.HIS*B.1047.ARG
4cahB          B.1038.ARG*B.1012.TRP
4cahB       B.1012.TRP*B.1010.GLNGLY
4cahB        B.992.TRP*B.1047.ARGARG
4cahB       B.1031.GLU*B.1031.GLULYS
4cahB         B.949.PHE*B.950.VALGLU
4cahB           B.1039.ARG*B.954.PHE
4cahB       B.1030.ALAGLU*B.1014.TYR
4cahB       B.1035.TYR*B.1014.TYRSER
4cahB          B.1040.ARG*B.1012.TRP
4cahB          B.1041.ARG*B.1005.ARG
4cahB           B.1012.TRP*B.957.GLN
4cahB      B.970.ASPASN*B.968.METSER
4cahB       B.1031.GLU*B.1032.LYSMET
4cahB          B.1039.ARG*B.1027.TRP
4cahB           B.994.TRP*B.1044.ARG
2wxwA         A.226.THRGLY*A.228.TRP
2wxwA         A.367.GLU*A.366.ALAGLU
2wxwA      A.361.ASPLEU*A.363.LEUALA
2wxwA           A.78.ASNPHE*A.82.PHE
2wxwA         A.305.GLUSER*A.434.GLN
2wxwA         A.251.PHEGLN*A.250.HIS
2wxwA           A.96.HIS*A.94.VALVAL
2wxwA         A.433.ASPGLN*A.432.TYR
2wxwA          A.76.LEUALA*A.107.PHE
2wxwA            A.228.TRP*A.250.HIS
2wxwA         A.324.GLU*A.324.GLUGLY
2wxwA         A.417.GLU*A.416.PROGLU
2wxwA         A.350.GLN*A.351.LEUVAL
2wxwA           A.90.GLU*A.89.SERGLU
2wxwA      A.210.GLULEU*A.208.PHETHR
2wxwA             A.328.PHE*A.85.TYR
2wxwA             A.4.TYR*A.2.ARGVAL
2wxwA      A.263.GLUPRO*A.261.LEUALA
2wxwA         A.197.TYR*A.108.GLYTHR
2wxwA           A.79.PHELEU*A.83.ARG
2wxwA             A.143.ASP*A.13.HIS
2wxwA         A.252.GLNGLY*A.251.PHE
2wxwA         A.288.HIS*A.289.TRPSER
2wxwA         A.124.ARG*A.120.HISTHR
2wxwA            A.220.ARG*A.216.GLU
2wxwA         A.373.HIS*A.369.PROALA
2wxwA         A.345.HIS*A.346.LEUTHR
4jsnC            C.139.ASN*C.137.HIS
4jsnC          C.25.ARG*C.310.GLYHIS
4jsnC           C.86.LYSASN*C.62.TYR
4jsnC         C.42.ASPSER*A.2274.ASP
4jsnC          C.27.TRP*C.308.TYRGLY
4jsnC          C.97.GLYARG*C.115.ARG
4jsnC        C.72.SERASN*C.70.LEUASN
4jsnC         C.291.ASP*C.289.SERSER
4jsnC         C.177.HIS*C.178.ILEASP
4jsnC         C.292.ASN*C.313.LYSALA
4jsnC              C.64.HIS*C.66.ARG
4jsnC           C.44.GLN*C.44.GLNVAL
4jsnC         C.219.HIS*C.238.CYSSER
4jsnC              C.98.ARG*C.99.TRP
4jsnC           C.272.TRP*A.2285.GLU
4jsnC          C.30.HISSER*C.306.ARG
4jsnC            C.62.TYR*A.2277.HIS
4jsnC         C.195.TYRVAL*C.197.TRP
4jsnC            C.155.TRP*C.125.PHE
1ku1A            A.699.PHE*A.703.TYR
1ku1A      A.587.ILEALA*A.585.GLYPHE
1ku1A         A.630.LEUPHE*A.600.PHE
1ku1A            A.657.GLN*A.654.GLU
1ku1A            A.736.HIS*B.572.GLU
1ku1A      A.717.VALLYS*A.719.GLUHIS
1ku1A         A.729.ASNLEU*B.565.GLU
1ku1A         A.592.ASP*A.622.SERLEU
1ku1A         A.692.GLNPRO*A.675.TYR
1ku1A           A.-2.HIS*A.-4.GLYSER
1ku1A            A.640.GLU*A.637.ARG
1ku1A         A.684.ALAGLU*A.742.TRP
1ku1A         A.671.GLU*A.671.GLUASN
1ku1A             A.558.ASP*A.-5.ARG
1ku1A         A.637.ARG*A.746.ARGVAL
1ku1A         A.656.GLNGLN*A.660.ARG
1ku1A         A.739.PHE*A.733.CYSCYS
3vf7B            B.87.ARG*A.7.LYSARG
3vf7B            B.7.LYSARG*A.87.ARG
3vf7B        B.51.GLYGLY*A.51.GLYGLY
4pfiA         A.189.ARG*A.209.GLNTHR
4pfiA         A.188.PHE*A.227.GLNSER
4pfiA         A.223.ASN*A.221.LEUGLY
4pfiA         A.197.ALAGLU*A.201.ARG
4pfiA         A.227.GLN*A.227.GLNSER
4pfiA          A.107.PHEALA*A.52.GLU
4pfiA            A.250.ARG*A.318.ARG
4pfiA        A.76.GLYARG*A.78.ILEGLU
4pfiA         A.262.GLU*A.158.LEUGLN
4pfiA         A.291.GLN*A.291.GLNGLU
4pfiA            A.253.ARG*A.168.TRP
4pfiA      A.103.VALASN*A.101.GLYSER
4pfiA            A.275.TRP*A.271.GLN
4pfiA         A.243.GLN*A.173.ALAASN
4pfiA         A.321.PHE*A.179.THRPRO
4pfiA         A.188.PHE*A.226.GLYGLN
4pfiA         A.235.GLU*A.235.GLUGLU
4pfiA      A.222.GLYASN*A.224.ILEASP
4pfiA            A.188.PHE*A.200.PHE
4pfiA         A.208.VALGLN*A.209.GLN
1zpwX           X.37.PHE*X.30.GLUARG
1zpwX           X.35.SERVAL*X.10.TYR
1zpwX           X.37.PHE*X.25.LEULYS
3nz3A           A.15.THRARG*A.62.TRP
3nz3A           A.84.GLNGLU*A.61.ASN
3nz3A              A.41.ARG*A.54.TYR
3nz3A        A.76.PROASP*A.78.ILEPRO
3nz3A           A.62.TRPASP*A.61.ASN
1olpA            A.154.TYR*A.158.ARG
1olpA            A.136.HIS*A.130.ASP
1olpA             A.136.HIS*A.69.PHE
1olpA         A.162.TYR*A.158.ARGLYS
1olpA         A.141.THRALA*A.148.HIS
1olpA         A.132.ASN*A.227.ASNALA
1olpA       A.122.GLYGLN*A.51.GLYSER
1olpA         A.114.TYR*A.112.GLYASN
1olpA           A.70.TRP*A.71.ASPPRO
1olpA          A.114.TYRGLU*A.44.ASN
1olpA         A.267.VALGLN*A.301.ARG
1olpA         A.338.TRP*A.339.LYSPRO
1olpA         A.325.TRP*A.279.GLYILE
1olpA         A.305.GLYTHR*A.307.TYR
1olpA         A.309.LEULYS*A.290.TRP
1olpA           A.5.GLUASP*B.269.ASP
1olpA         A.162.TYR*A.221.ALASER
1olpA         A.123.GLNGLY*A.101.PHE
1olpA            A.219.TYR*A.207.HIS
1olpA            A.57.TYR*A.4.LYSGLU
1olpA            A.352.ARG*A.318.TYR
1olpA      A.108.GLUTRP*A.113.ASNTYR
1olpA              A.93.ASN*A.70.TRP
1olpA            A.275.TYR*C.214.TRP
1olpA         A.294.ASNPRO*A.293.ASP
1olpA         A.135.TYR*A.147.GLYHIS
1olpA           A.269.ASP*B.5.GLUASP
1olpA         A.212.ASN*A.207.HISALA
1olpA         A.266.ASPVAL*A.301.ARG
1olpA           A.2.ASP*A.152.GLUTHR
1olpA            A.253.TYR*A.184.ASN
1olpA           A.95.GLU*A.95.GLUSER
1olpA             A.126.HIS*A.11.HIS
1olpA            A.266.ASP*A.302.ASN
1olpA            A.327.ARG*A.277.TYR
3svkA         A.160.GLUGLY*A.162.PHE
3svkA           A.97.GLU*A.97.GLUALA
3svkA      A.351.ASNGLY*A.177.LYSALA
3svkA            A.107.ARG*B.110.TRP
3svkA          A.260.ILEVAL*A.18.GLN
3svkA         A.244.TRP*A.242.TYRHIS
3svkA            A.383.ARG*A.382.ARG
3svkA            A.378.ARG*A.186.TYR
3svkA            A.110.TRP*B.107.ARG
3svkA         A.169.ALATYR*A.173.ARG
3svkA         A.181.ALATRP*A.187.PHE
3svkA         A.150.GLYILE*A.225.PHE
3svkA         A.328.GLUALA*A.327.ASN
1z1yA           A.25.ASN*A.10.ASNGLY
1z1yA              A.77.TYR*A.54.PHE
1z1yA            A.3.THRVAL*A.20.PHE
1z1yA         A.163.PHE*A.174.GLYPRO
1z1yA           A.87.ASP*A.76.GLYTYR
4r38A           A.30.GLU*A.29.ASPGLU
4r38A         A.102.GLYPRO*A.114.PHE
4r38A           A.57.PHE*A.55.CYSARG
4r38A              A.56.ARG*A.54.ASN
4r38A           A.85.ILETYR*A.87.ASN
4r38A            A.107.GLN*D.107.GLN
4r38A              A.95.PHE*A.89.ARG
4r38A           A.70.ARG*A.66.GLYALA
4r38A         A.123.GLN*A.122.GLYGLN
4r38A           A.95.PHETRP*A.86.TYR
4r38A             A.123.GLN*A.93.GLU
4r38A              A.53.ARG*A.57.PHE
4r38A           A.34.TYR*A.35.VALASN
2aplA               A.45.TYR*A.8.GLU
2aplA           A.85.GLU*A.84.ARGGLU
2aplA           A.26.GLU*A.24.PHEPRO
2aplA         A.120.ASP*A.118.THRASP
2aplA         A.109.GLN*A.104.LYSASN
2aplA           A.72.PHE*A.73.SERARG
2aplA         A.121.PHE*A.126.GLUTYR
4c6aA             A.137.TRP*A.12.PHE
4c6aA          A.133.GLUILE*A.12.PHE
4c6aA              A.7.ASN*A.154.TYR
4c6aA           A.12.PHE*A.13.LEUALA
4c6aA             A.118.ARG*A.71.PHE
2a15A          A.116.ASNLYS*A.87.ASP
2a15A         A.123.ASN*A.122.THRASN
2a15A           A.17.TRP*A.13.SERGLN
4eicA           A.14.CYSALA*A.10.PHE
4eicA           A.93.TRP*A.87.GLNALA
4eicA            A.6.GLYALA*A.83.TYR
4eicA              A.71.ARG*A.68.PHE
3blxA           A.81.TRP*A.56.GLNTHR
3blxA             A.98.ARG*A.136.PHE
3blxA         A.269.PHE*A.297.LEUMET
3blxA           A.72.ARG*A.68.GLUSER
3blxA         A.247.GLYALA*A.110.PHE
3blxA         A.214.ILEILE*A.182.HIS
3blxA            A.230.PHE*A.229.GLN
3blxA      A.120.ILEPRO*A.118.THRARG
3blxA      A.326.THRARG*A.331.GLYSER
3blxA            A.104.TYR*A.161.ARG
3blxA         A.304.LEUASN*A.306.GLU
3blxA           A.98.ARG*A.94.ASNVAL
3blxA         A.130.GLU*A.130.GLUASN
3blxA      A.319.ILEALA*A.321.GLUGLY
3blxA      A.186.ILEMET*A.184.ALAASN
3blxA         A.167.PHEASP*A.206.TYR
3blxA           A.81.TRP*A.25.GLYASP
3blxA         A.303.GLYLEU*A.305.ASN
3blxA           A.47.ILEASP*A.17.ARG
3r2cA           A.60.GLU*K.32.THRGLY
3r2cA               A.42.ASP*A.3.TYR
3r2cA               A.46.TYR*A.4.ARG
3r2cA             A.4.ARGLYS*A.8.ARG
3r2cA           A.83.ASN*A.15.LEUTYR
3r2cA          A.129.ALAILE*A.68.HIS
3r2cA              A.94.PHE*A.57.HIS
3hygB         B.411.GLU*B.381.METALA
3hygB            B.359.TYR*B.349.ASN
3hygB         B.345.GLN*B.345.GLNHIS
3hygB         B.423.SERLYS*A.285.ARG
3hygB            B.290.TYR*B.283.TYR
3hygB         B.416.LEUGLY*B.463.PHE
3hygB         B.359.TYRASP*B.358.HIS
3hygB         B.439.METSER*B.421.ASP
3hygB         B.285.ARG*B.285.ARGGLY
3hygB         B.411.GLU*B.380.GLYMET
3hygB         B.466.ASPGLY*B.468.HIS
3hygB            B.348.HIS*B.344.TRP
7odcA            A.126.ASN*A.122.TYR
7odcA         A.398.ASNGLY*A.400.PHE
7odcA              A.414.TRP*A.4.PHE
7odcA         A.372.LEUPRO*A.350.TYR
7odcA         A.371.ASN*A.351.TYRSER
7odcA             A.7.ASPGLU*A.8.GLU
7odcA         A.196.PHE*A.211.ALAVAL
7odcA         A.236.GLYGLY*A.238.PHE
7odcA           A.67.ALAVAL*A.66.TYR
7odcA            A.323.TYR*A.397.PHE
7odcA         A.393.ALAALA*A.327.ASN
7odcA            A.248.PHE*A.278.TYR
7odcA         A.341.GLN*A.341.GLNLYS
7odcA            A.356.TRP*A.317.TYR
7odcA            A.136.GLU*A.183.ARG
7odcA           A.38.ASP*A.36.ASPLYS
7odcA      A.235.GLYGLY*A.274.GLUPRO
4kyuA            A.142.TYR*A.140.GLU
4kyuA         A.159.VALALA*A.163.PHE
4kyuA         A.120.LYSLEU*A.122.ASP
4kyuA              A.40.ASP*A.20.PHE
4kyuA              A.94.GLU*A.91.ASN
4kyuA           A.27.ARG*B.66.GLUPRO
4ff5A            A.231.ASN*A.234.GLU
4ff5A            A.127.TYR*A.129.TRP
4ff5A           A.38.GLN*A.37.TRPGLN
4ff5A           A.76.GLYILE*A.60.HIS
4ff5A         A.186.TYR*A.209.THRSER
4ff5A           A.61.SERGLY*A.60.HIS
4ff5A         A.148.ARG*A.148.ARGALA
4ff5A         A.223.ILEASN*A.208.TYR
4ff5A         A.127.TYR*A.158.ASNILE
4ff5A         A.133.GLUASP*A.167.PHE
4ff5A            A.240.PHE*A.236.PHE
4ff5A      A.221.LEUASP*A.210.SERLYS
4ff5A          A.116.PHE*A.98.TYRALA
4rgoL              L.61.ARG*L.79.GLU
4rgoL         L.155.ARGGLN*L.157.ASN
4rgoL             L.32.TYR*S.142.ASN
4rgoL         L.188.ARG*L.184.ASPGLU
4rgoL           L.32.TYRLEU*L.34.HIS
4rgoL             L.50.TYR*S.135.ARG
4rgoL         L.129.GLYALA*L.124.GLN
4rgoL         L.175.METSER*H.173.PHE
4rgoL      L.129.GLYALA*L.182.THRLYS
4rgoL              L.49.ASN*L.50.TYR
4rgoL         L.161.ASNSER*L.163.TRP
4rgoL              L.94.PHE*H.58.TYR
3q9lA            A.253.PHE*A.245.ARG
3q9lA        A.12.GLYGLY*B.12.GLYGLY
3q9lA            A.215.GLN*B.187.ARG
3q9lA             A.99.ARG*A.134.TYR
3q9lA            A.126.GLU*B.126.GLU
3q9lA         A.219.ARG*A.215.GLNSER
3q9lA              A.62.ASN*A.59.ASP
3q9lA            A.234.ASP*A.255.PHE
3q9lA           A.31.GLYLYS*A.82.ASN
3q9lA            A.187.ARG*B.215.GLN
3q9lA         A.190.ARG*A.186.GLYARG
3q9lA         A.164.SERARG*A.134.TYR
1u84A           A.23.GLYLYS*A.18.ASP
3gwrA              A.76.HIS*B.49.ASN
3gwrA           A.49.ASN*A.47.PROLEU
3gwrA             A.80.GLN*B.111.ARG
3gwrA           A.117.TRP*A.8.THRPRO
3gwrA           A.76.HIS*A.77.GLUILE
3gwrA              A.49.ASN*B.76.HIS
3gwrA           A.23.ARGSER*A.62.PHE
3gwrA            A.123.HIS*B.123.HIS
3gwrA         A.106.ALATHR*A.108.ASN
1b7fA         A.278.GLU*A.277.PROGLU
1b7fA         A.178.ASPSER*A.173.PHE
1b7fA         A.267.GLUALA*A.234.TYR
1b7fA         A.146.ARG*A.149.GLYPRO
1b7fA         A.158.ARGASP*A.166.TYR
1b7fA         A.264.GLUALA*A.259.TYR
1b7fA         A.165.SERTYR*A.164.TYR
1b7fA            A.250.ARG*B.274.ASN
1b7fA            A.258.ARG*A.212.ASN
1b7fA         A.240.LYSASN*A.239.GLN
4fk8A         A.157.HIS*A.192.TYRPRO
4fk8A              A.76.GLU*A.78.HIS
4fk8A             A.167.TYR*A.82.PHE
4fk8A          A.51.GLU*A.110.PROTHR
4fk8A           A.21.THRALA*A.20.ASP
4fk8A         A.178.HIS*A.177.GLYHIS
4fk8A         A.230.ARG*A.228.GLNASP
4fk8A            A.173.HIS*B.173.HIS
4fk8A         A.222.PROPRO*A.216.PHE
4fk8A         A.263.TYR*A.253.VALGLU
4fk8A             A.75.TYR*A.178.HIS
1jv1A            A.412.GLN*A.115.ARG
1jv1A         A.498.HIS*A.496.GLYVAL
1jv1A           A.90.TRP*A.86.GLNLEU
1jv1A      A.323.PHEASN*A.321.LEULEU
1jv1A         A.304.TYR*A.288.PROVAL
1jv1A         A.473.ALAGLY*A.432.TRP
1jv1A            A.388.PHE*A.345.TYR
1jv1A         A.364.GLN*A.363.THRGLN
1jv1A              A.29.GLN*A.26.GLU
1jv1A            A.388.PHE*A.387.GLN
1jv1A              A.30.GLN*A.22.TRP
1jv1A        A.15.GLNGLU*A.10.LEUSER
1jv1A            A.447.ARG*A.439.HIS
1jv1A         A.263.ARGPHE*A.395.TYR
1jv1A         A.178.PHETHR*A.183.TYR
1jv1A            A.337.PHE*A.274.ASP
1jv1A            A.381.PHE*A.352.HIS
1jv1A      A.451.ILEPRO*A.449.PROALA
1jv1A         A.123.GLYMET*A.136.PHE
1jv1A         A.346.GLU*A.346.GLUPRO
1jv1A            A.429.HIS*A.432.TRP
1jv1A         A.415.LYSASP*A.417.ASN
1jv1A             A.29.GLN*A.214.ASN
1jv1A         A.486.PHE*A.484.LYSGLU
1jv1A            A.320.ARG*B.320.ARG
1jv1A         A.167.SERGLY*A.195.GLN
1jv1A         A.332.PHE*A.333.PHETHR
1jv1A         A.392.PHE*A.393.VALVAL
1jv1A         A.374.ASNGLY*A.204.PHE
1jv1A         A.136.PHEGLN*A.184.PHE
3m7aA           A.94.PROPRO*A.96.ASP
3m7aA         A.130.TYR*A.105.THRVAL
3m7aA         A.113.PHE*A.136.PROALA
3m7aA        A.94.PROPRO*A.92.ARGASN
3m7aA              A.40.HIS*A.64.GLU
3m7aA           A.61.PHE*A.59.HISVAL
3m7aA           A.90.PHELEU*A.72.GLN
3m7aA            A.118.ARG*A.165.TRP
4hrrB         B.106.ARGGLN*B.107.GLN
4hrrB              B.77.TYR*A.79.ASN
4hrrB        B.28.SERVAL*B.30.ASPMET
4hrrB         B.133.ASPGLU*B.132.PHE
4hrrB         B.131.TYR*C.123.LYSALA
2j9cA            A.87.GLYASP*A.9.ARG
2j9cA           A.83.THRGLY*A.82.ARG
2j9cA              A.49.ARG*A.51.TYR
2j9cA           A.67.GLU*A.67.GLUGLU
2j9cA           A.23.ALAGLY*A.25.TYR
2vchA      A.104.PHEVAL*A.109.ARGLEU
2vchA         A.421.ARG*A.421.ARGVAL
2vchA         A.135.TYR*A.208.GLUGLY
2vchA            A.265.GLN*A.261.TRP
2vchA         A.367.TRP*A.140.THRTHR
2vchA         A.273.VALSER*A.272.TYR
2vchA           A.45.GLU*A.44.GLYGLU
2vchA          A.137.PHE*A.22.PROLEU
2vchA         A.264.ASNGLN*A.265.GLN
2vchA         A.364.HIS*A.275.PHEGLY
2vchA         A.137.PHE*A.138.TYRPRO
2vchA      A.162.PHEARG*A.179.GLYLYS
2vchA          A.243.VALASN*A.25.GLU
2vchA         A.340.GLYPHE*A.261.TRP
2vchA         A.305.ARG*A.277.SERGLY
2g2nA          A.15.THRGLY*D.106.TYR
2g2nA        A.30.ALAASP*A.32.ASNGLY
2g2nA              A.14.GLN*D.14.GLN
2g2nA          A.106.TYR*D.15.THRGLY
2g2nA          A.102.LEULEU*A.13.GLN
2g2nA           A.90.ILEASN*A.89.HIS
2g2nA           A.96.HIS*A.97.TYRHIS
2g2nA              A.34.TRP*A.63.ARG
2g2nA           A.88.PHE*A.62.TYRARG
3fijA         A.232.LEUPHE*A.112.PHE
3fijA         A.235.ALALEU*A.211.TRP
3fijA             A.72.ASP*A.180.GLN
3fijA            A.178.HIS*A.216.GLN
3fijA         A.213.LEUGLY*A.212.TYR
3fijA            A.239.GLU*A.211.TRP
3fijA            A.223.PHE*A.224.GLN
3fijA           A.31.GLNARG*A.35.ASP
3fijA           A.71.GLN*A.88.ALATYR
3fijA              A.57.GLN*C.43.PHE
3fijA         A.212.TYRLEU*A.211.TRP
1njhA              A.91.ARG*A.89.GLU
1njhA           A.77.TYR*A.78.ALAGLU
1njhA           A.98.LEUPRO*A.97.HIS
1njhA          A.112.LYSPRO*A.22.TYR
1njhA           A.65.TYR*A.62.ASNGLY
1njhA           A.16.TYRALA*A.54.TYR
1a59A         A.313.LYSGLN*A.314.GLN
1a59A            A.139.ARG*A.144.GLU
1a59A         A.104.LEUGLY*A.206.HIS
1a59A         A.329.LEUMET*A.293.TYR
1a59A              A.73.HIS*A.69.PHE
1a59A              A.50.TYR*A.54.ASN
1a59A            A.186.HIS*A.278.ARG
1a59A          A.71.ARG*A.153.LEUASP
1a59A         A.371.GLYPRO*A.369.TYR
1a59A           A.70.GLU*A.70.GLUARG
1a59A         A.266.GLYPHE*A.318.ASN
1a59A              A.62.GLU*A.59.ASN
1a59A         A.345.ARG*A.185.GLUHIS
1a59A         A.349.TRP*A.212.ALAILE
1a59A            A.138.GLN*A.142.ARG
1a59A         A.111.ALAGLN*A.112.GLN
1a59A            A.341.PHE*A.183.TYR
1a59A            A.302.TYR*A.321.TYR
1a59A           A.35.PROVAL*A.37.GLN
1a59A         A.361.ALALEU*A.360.ASN
1a59A         A.121.GLU*A.121.GLULYS
1a59A             A.158.ASN*A.74.ARG
1a59A            A.238.ARG*A.249.ARG
1a59A          A.71.ARGSER*A.151.GLU
3vhxB         B.796.GLNGLU*B.766.GLU
3vhxB         B.755.METLEU*B.754.TYR
3vhxB         B.759.GLNGLU*B.758.HIS
3vhxB         B.784.GLN*B.748.LEUALA
1umrC         C.301.SERARG*C.266.PHE
1umrC         C.274.TRP*A.102.THRLYS
1umrC         C.295.GLU*C.295.GLUPHE
1umrC          C.246.SERTHR*A.93.TYR
1umrC      C.287.PROGLU*C.289.TYRLYS
1umrC            C.293.HIS*A.117.PHE
1umrC         C.270.ALAASN*C.225.TRP
1umrC      C.239.SERHIS*C.232.CYSTHR
1umrC         C.297.GLU*C.311.ALAPRO
1umrC          C.289.TYR*A.46.SERALA
1umrC         C.247.THRGLU*C.251.ASP
1umrC         C.290.LYSGLU*C.289.TYR
1umrC            C.323.PHE*C.236.HIS
1umrC          C.282.SERASP*A.40.HIS
1umrC            C.271.ASN*C.225.TRP
1umrC             C.280.GLN*A.75.GLN
1umrC          C.308.TRP*A.95.ASNLEU
1umrC            C.235.GLN*C.231.PHE
1umrC          C.279.TRP*A.73.ARGVAL
1umrC          C.245.HISSER*A.93.TYR
1umrC         C.291.GLUTRP*A.116.TRP
1umrC            C.272.ASN*C.271.ASN
4ntdA         A.190.ARG*A.186.THRASP
4ntdA          A.102.LEUVAL*A.85.ASP
4ntdA         A.152.PROLEU*A.228.ARG
4ntdA           A.1.ASN*A.105.GLYVAL
4ntdA      A.118.GLYLEU*A.275.ASNVAL
4ntdA         A.263.GLYLEU*A.271.TRP
4ntdA         A.240.ARG*A.119.LEUARG
4ntdA           A.65.LEUGLU*A.69.ARG
4ntdA           A.87.VALGLU*A.86.ASP
4ntdA         A.222.GLU*A.221.ALAGLU
4ntdA         A.300.GLN*A.300.GLNLEU
4ntdA         A.141.PROTYR*A.172.TRP
4ntdA            A.196.ARG*A.170.ARG
4ntdA       A.22.ASNALA*A.290.GLYSER
4ntdA       A.18.ALAGLY*A.286.SERALA
4ntdA         A.191.ARG*A.187.ASPASP
1z6oM         M.173.ARGHIS*E.192.ASN
1z6oM            M.136.PHE*O.124.ARG
1z6oM            M.137.ASN*M.139.TYR
1z6oM           M.43.GLYALA*M.61.PHE
1z6oM             M.154.TYR*N.81.ARG
1z6oM          M.135.GLUPHE*M.18.HIS
1z6oM              M.68.ARG*A.84.TRP
1z6oM          M.53.ARG*M.179.GLUPHE
1z6oM         M.102.TRP*M.100.SERSER
1z6oM             M.81.ARG*O.154.TYR
1z6oM          M.158.ARG*B.64.ASNTYR
1z6oM         M.136.PHE*M.137.ASNASP
1z6oM            M.124.ARG*N.136.PHE
1z6oM             M.99.ARG*M.102.TRP
3c3iA           A.82.ASPTYR*A.84.ARG
3c3iA           A.92.TYR*A.93.ASNTHR
3c3iA          A.99.TYR*A.100.ILEILE
3c3iA           A.84.ARGGLY*C.96.GLU
3c3iA              A.80.ASP*C.97.ARG
1jy2P              P.15.PHE*S.28.PHE
1jy2P           P.18.TYR*S.19.CYSPRO
1jy2P           P.33.GLN*P.33.GLNTHR
1jy2P              P.28.PHE*S.15.PHE
1jy2P           P.19.CYSPRO*S.18.TYR
1l6pA           A.89.GLN*A.89.GLNALA
1l6pA           A.21.ASPPHE*A.20.PHE
1l6pA           A.74.SERGLU*A.65.TRP
1l6pA           A.50.PROGLU*A.51.GLU
1l6pA           A.67.GLUASP*A.66.HIS
1l6pA           A.23.GLN*A.22.PHEGLN
1l6pA           A.30.ASN*A.31.LEUTHR
1l6pA           A.90.ALASER*A.89.GLN
1l6pA          A.40.TYR*A.103.CYSALA
1mz4A           A.14.SERGLU*A.15.GLU
1mz4A        A.66.ARGASP*A.59.LEUALA
1mz4A           A.90.GLU*A.90.GLUVAL
1mz4A          A.101.PHE*A.92.HISPRO
1mz4A          A.29.GLYLYS*A.118.HIS
1mz4A           A.33.PHE*A.37.CYSALA
1mz4A           A.13.ASNSER*A.68.ASN
1mz4A              A.96.ARG*A.78.ASN
1mz4A          A.43.GLYGLY*A.130.TRP
1mz4A              A.83.ASP*A.85.GLU
2e1zA      A.328.GLYGLU*A.323.PHETHR
2e1zA      A.236.ARGSER*A.267.SERGLY
2e1zA           A.44.PHE*A.36.ASPGLY
2e1zA             A.94.PHE*A.142.PHE
2e1zA         A.151.ALAPRO*A.155.TYR
2e1zA      A.235.THRARG*A.267.SERGLY
2e1zA         A.179.HISARG*A.146.PHE
2e1zA         A.357.PROASN*A.363.ARG
2e1zA      A.370.SERGLN*A.372.VALILE
2e1zA            A.175.HIS*A.203.HIS
2e1zA              A.62.ASP*A.59.ASN
2e1zA           A.32.ALAGLY*A.19.PHE
2e1zA            A.155.TYR*A.170.ARG
2e1zA            A.220.ASP*A.311.HIS
2e1zA         A.120.TYR*A.112.SERPRO
2e1zA         A.335.ARG*A.331.SERVAL
1rdo1            1.166.ASP*1.173.PHE
1rdo1         1.183.TYR*1.145.ASNALA
1rdo1         1.165.THRASP*1.173.PHE
1rdo1         1.153.GLN*1.206.ASNGLY
1rdo1         1.185.ASNTRP*1.209.TRP
1rdo1         1.183.TYR*1.184.THRASN
1rdo1            1.116.TYR*2.116.TYR
1jayA            A.197.ASN*B.184.ASN
1jayA        A.31.SERARG*A.33.ARGGLU
1jayA           A.31.SERARG*A.58.ASN
1jayA         A.133.HIS*A.131.ALALEU
1jayA            A.147.PHE*A.149.TRP
1jayA         A.201.PHE*B.179.ALAGLY
1jayA           A.30.GLYSER*A.58.ASN
3iteA         A.222.PHE*A.270.HISALA
3iteA              A.31.TRP*A.28.HIS
3iteA         A.118.ARG*A.114.SERPHE
3iteA           A.83.ARGSER*A.82.ASP
3iteA         A.294.LEUGLY*A.293.TYR
3iteA         A.165.ASNASN*A.167.TYR
3iteA           A.71.SERLEU*A.73.HIS
3iteA          A.31.TRP*A.217.GLYGLY
3iteA         A.402.ARGTHR*A.401.TYR
3iteA         A.378.LEUVAL*A.194.ASN
3iteA         A.420.ARG*A.404.GLYASP
3iteA          A.161.SERASP*A.61.ASN
3iteA             A.162.ASP*A.22.GLU
3iteA           A.85.LEUILE*A.51.TRP
3iteA         A.309.TRP*A.284.VALPRO
3iteA         A.102.VALPRO*A.101.TYR
3tqnA      A.102.GLUARG*A.104.LEUGLY
3tqnA        A.99.ASNLYS*A.96.GLNILE
3tqnA           A.80.ARG*A.76.GLYALA
3tqnA        A.27.TYRVAL*A.25.GLYSER
3tqnA              A.12.GLN*A.11.TYR
3hy0A         A.169.PHE*A.179.GLYPRO
3hy0A         A.427.ALAMET*A.395.PHE
3hy0A           A.98.PHE*A.96.PHESER
3hy0A         A.168.ASN*A.131.VALTYR
3hy0A         A.136.ASP*A.134.SERASP
3hy0A          A.89.PHE*A.288.ARGSER
3hy0A         A.191.HIS*A.189.GLYASP
3hy0A         A.253.ASN*A.241.GLUARG
3hy0A            A.155.ARG*A.139.TYR
3hy0A             A.89.PHE*A.292.PHE
3hy0A           A.70.ALAGLY*A.75.ASN
3hy0A            A.221.GLN*A.227.GLU
3hy0A            A.187.ASP*A.207.TYR
3hy0A              A.95.ASN*A.15.PHE
3hy0A         A.168.ASNPHE*A.132.TYR
3hy0A         A.170.TRP*A.171.GLNMET
3hy0A              A.79.ASN*A.86.HIS
3hy0A         A.428.METGLU*A.432.ARG
3hy0A         A.140.GLU*A.140.GLUILE
3hy0A         A.300.PROSER*A.310.ARG
3hy0A         A.187.ASPHIS*A.186.TYR
3hy0A         A.195.GLYPRO*A.207.TYR
3hy0A         A.189.GLYASP*A.206.ARG
3hy0A              A.74.HIS*A.69.ARG
3hy0A           A.96.PHE*A.94.GLYASN
2gw4B         B.211.TYR*B.212.GLUHIS
2gw4B          B.180.ARG*B.86.GLYPHE
2gw4B              B.91.ARG*B.89.TRP
2gw4B            B.189.TYR*D.140.GLU
2gw4B      B.207.GLUVAL*B.205.TYRASN
2gw4B          B.104.THRASN*B.89.TRP
2gw4B          B.181.GLN*B.83.PHEPRO
2gw4B        B.68.PHEALA*A.36.GLYLYS
2gw4B         B.206.ASN*B.204.ASPTYR
2gw4B         B.120.PHE*B.121.ASPGLY
2gw4B            B.140.GLU*D.189.TYR
2gw4B              B.71.TYR*B.77.ASP
2gw4B            B.205.TYR*B.201.HIS
2gw4B              B.68.PHE*A.38.GLN
2gw4B           B.79.PHE*B.66.ARGVAL
2gw4B         B.217.HIS*B.191.PHEVAL
3s64A           A.59.LEUALA*A.38.PHE
4dipA           A.77.PHE*A.78.THRLEU
4dipA              A.67.HIS*A.51.HIS
4dipA              A.64.HIS*A.69.HIS
4dipA           A.38.CYSHIS*J.73.GLN
4dipA           A.63.PHE*A.54.GLYTYR
3qpaA            A.191.TYR*A.172.ASN
3qpaA         A.149.TYR*A.151.LYSASN
3qpaA         A.192.GLYPRO*A.196.ARG
3qpaA              A.20.ARG*A.17.ARG
3qpaA           A.47.ASN*A.72.GLYVAL
3qpaA           A.38.TYR*A.39.ALAARG
3qpaA          A.117.GLYGLY*A.38.TYR
3qpaA         A.167.THRLYS*A.202.PHE
3qpaA          A.121.GLN*A.83.ASPASN
3qpaA           A.97.GLU*A.74.GLYGLY
1bwdA            A.107.ARG*A.331.HIS
1bwdA         A.276.LYSPRO*A.272.PHE
1bwdA           A.47.GLNILE*A.42.TYR
1bwdA           A.339.ARG*A.9.GLUTRP
1bwdA         A.138.LEULEU*A.148.TRP
1bwdA           A.342.ALALEU*A.7.HIS
1bwdA          A.87.HIS*A.101.PHEHIS
1bwdA            A.255.PHE*A.189.ASP
1bwdA         A.114.GLYGLN*A.115.GLN
1bwdA            A.300.ARG*A.319.GLN
1bwdA         A.344.GLUTHR*A.346.TYR
1bwdA               A.8.ASN*A.10.TRP
1bwdA         A.227.HIS*A.181.ALAASN
1bwdA            A.255.PHE*A.217.HIS
1bwdA         A.137.LEULEU*A.141.TYR
1bwdA           A.44.SERGLN*A.34.PHE
4mo2A              A.39.ASN*A.53.TYR
4mo2A             A.284.PHE*A.51.HIS
4mo2A          A.97.METASN*A.176.TYR
4mo2A         A.311.PROILE*A.313.ASN
4mo2A          A.96.ASNMET*A.100.PHE
4mo2A           A.41.TYR*A.42.THRGLU
4mo2A          A.95.PHEASN*A.100.PHE
4mo2A         A.345.TYR*A.346.TYRASP
4mo2A           A.78.PHE*A.79.ILEASN
4mo2A             A.59.ARG*A.181.PHE
4mo2A          A.96.ASN*A.177.ASPASN
4mo2A      A.165.SERILE*A.167.ILEARG
4mo2A            A.155.TRP*A.246.ARG
4mo2A         A.233.ASPALA*A.238.TYR
4mo2A          A.337.GLYGLY*A.12.PHE
4mo2A            A.296.GLU*A.275.TYR
4mo2A              A.75.PHE*A.66.TRP
4mo2A      A.129.ASNLEU*A.163.PROALA
4mo2A              A.41.TYR*A.35.HIS
4mo2A      A.183.ASPPRO*A.185.TYRGLN
4mo2A         A.342.GLUTYR*A.321.TYR
4mo2A         A.303.ILELYS*A.302.TRP
4mo2A             A.66.TRP*A.185.TYR
4mo2A          A.66.TRP*A.185.TYRGLN
4mo2A          A.250.PHE*A.53.TYRGLY
4mo2A         A.333.ASNVAL*A.335.TYR
4mo2A           A.48.ILEASN*A.44.ASN
4mo2A         A.308.PROTYR*A.245.TYR
4mo2A              A.33.ARG*A.53.TYR
3apqA         A.149.TRP*A.180.ARGILE
3apqA            A.120.TYR*A.119.ARG
3apqA              A.84.TYR*A.55.PHE
3apqA         A.154.TYRSER*A.201.TYR
3apqA           A.72.ASNALA*A.76.ASP
3apqA              A.96.TYR*A.36.PHE
3apqA         A.169.ARG*A.165.ALAPRO
3apqA         A.154.TYR*A.184.VALASN
3apqA         A.199.ASNSER*A.201.TYR
3apqA         A.200.SERTYR*A.201.TYR
4ro3A                A.6.GLN*B.4.PHE
4ro3A           A.21.GLN*A.20.LYSGLN
4ro3A             A.4.PHE*A.3.LYSPHE
4ro3A           A.42.GLNTYR*A.54.TYR
4ro3A        A.84.GLYLEU*A.86.ILEGLU
2hv2A         A.368.PHE*B.232.THRASN
2hv2A         A.232.THRASN*B.368.PHE
2hv2A             A.36.ARG*A.193.ARG
2hv2A         A.200.GLN*A.199.ASNGLN
2hv2A         A.233.ASN*B.369.TYRGLU
2hv2A         A.203.TYR*A.204.TYRSER
2hv2A             A.155.ARG*E.84.TYR
2hv2A            A.125.TYR*A.124.GLN
2hv2A      A.370.GLUARG*A.372.LEUGLN
2hv2A            A.169.TYR*A.182.ARG
2hv2A             A.43.HIS*A.185.TRP
2hv2A         A.216.TYR*A.199.ASNGLN
2hv2A            A.158.TRP*A.192.ASN
2hv2A         A.158.TRP*A.191.LEUASN
2hv2A           A.12.GLUGLU*A.13.GLU
2hv2A         A.316.TRP*A.314.GLYPRO
2hv2A         A.172.ASNGLN*A.176.HIS
2hv2A         A.261.GLYLYS*A.259.PHE
2hv2A         A.234.THRALA*A.203.TYR
2hv2A             A.84.TYR*C.155.ARG
2hv2A         A.123.ARG*A.119.TYRPRO
2hv2A             A.36.ARG*A.189.TYR
2hv2A           A.31.ALAGLU*A.35.GLU
2hv2A      A.301.GLULYS*A.326.ASPGLU
2hv2A         A.311.ASPSER*A.318.GLU
2hv2A            A.229.ASN*A.172.ASN
2hv2A            A.133.GLN*A.280.TYR
2hv2A              A.72.ARG*A.67.ASN
1wmzA          A.122.TRP*A.96.LYSTRP
1wmzA           A.139.PHE*B.3.CYSPRO
1wmzA           A.70.GLN*A.69.GLYGLN
1wmzA           A.17.PHE*A.18.PHEASN
1wmzA           A.70.GLNLEU*A.61.TRP
1wmzA         A.108.ALAGLU*A.110.ASP
1wmzA          A.119.GLYGLY*A.58.PHE
1wmzA            A.106.ASN*A.105.TRP
1wmzA           A.94.TYR*A.95.THRLYS
1wmzA             A.81.GLU*A.104.ASN
1wmzA           A.94.TYR*A.50.SERALA
1wmzA              A.77.ASP*A.84.PHE
1wmzA          A.130.GLN*A.21.LEUTHR
1wmzA           A.72.TRP*A.23.THRTRP
1wmzA             A.1.ASNGLN*A.2.GLN
3nhmA           A.47.ALAALA*A.31.ARG
3nhmA         A.131.HISALA*B.131.HIS
1uxzA           A.39.TRP*A.14.GLNSER
1uxzA        A.91.GLYTRP*A.63.SERGLN
1uxzA           A.95.TRPTHR*A.60.ARG
1uxzA            A.9.GLUASP*A.11.HIS
1uxzA          A.48.ASN*A.107.GLYSER
1uxzA              A.24.ASP*A.95.TRP
1uxzA           A.98.ILEGLN*A.99.GLN
1uxzA           A.14.GLN*A.14.GLNSER
1uxzA            A.124.TRP*A.126.ARG
1uxzA           A.81.HIS*A.73.GLUGLU
2dvlA             A.99.PHE*A.227.TYR
2dvlA             A.160.HIS*A.35.TYR
2dvlA          A.93.GLN*A.112.LEUALA
2dvlA             A.344.ARG*A.30.ASP
2dvlA             A.341.ARG*A.23.TYR
2dvlA       A.75.ALAALA*A.245.GLYILE
2dvlA         A.212.VALPRO*A.211.PHE
2dvlA         A.297.ARG*A.293.LEUGLU
2dvlA         A.198.HIS*A.196.GLYLEU
2dvlA            A.162.HIS*A.117.TRP
2dvlA      A.129.GLYSER*A.131.ASPALA
2dvlA           A.16.ARG*A.12.ASPALA
2dvlA         A.177.PHE*A.175.SERALA
2dvlA         A.188.PHEGLY*A.206.ARG
2dvlA         A.345.TYR*A.249.GLYALA
2dvlA         A.343.GLU*A.343.GLUARG
2dvlA              A.34.GLU*A.29.TYR
2dvlA         A.223.ARGGLY*A.227.TYR
1cewI           I.97.PHE*I.28.ALAMET
1cewI           I.20.GLYLEU*I.60.TYR
1cewI         I.102.ILEPRO*I.104.TRP
1cewI           I.40.TYR*I.70.THRCYS
1g6hA               A.9.ARG*A.65.TYR
1g6hA          A.110.PROGLY*A.80.TYR
1g6hA         A.179.GLU*A.210.GLUHIS
1g6hA           A.21.LYSALA*A.20.PHE
1g6hA            A.234.GLU*A.224.TYR
1g6hA         A.194.ASN*A.190.HISASP
1g6hA            A.212.ARG*A.254.TYR
1g6hA            A.147.TYR*A.148.ASP
1g6hA          A.112.GLUSER*A.88.PHE
1g6hA            A.227.PHE*A.228.ASN
1g6hA             A.6.GLU*A.8.LEUARG
3la7A         A.124.ARG*A.120.METLEU
3la7A         A.138.GLU*A.138.GLUTHR
3la7A           A.47.LEULEU*A.46.PHE
3la7A         A.187.ARG*A.187.ARGVAL
3la7A              A.45.TYR*A.75.PHE
3la7A         A.147.SERARG*A.142.HIS
3la7A              A.35.PHE*A.88.ARG
3la7A          A.43.ARG*A.103.ALAPRO
3la7A           A.45.TYRPHE*A.75.PHE
3la7A              A.90.TYR*A.89.PHE
2w59A         A.353.TYR*A.351.GLNLEU
2w59A            A.428.ARG*A.447.TYR
2w59A         A.423.TRP*A.447.TYRARG
2w59A            A.528.TYR*B.528.TYR
2w59A         A.480.ARG*A.480.ARGGLY
2w59A         A.563.GLNLYS*A.538.TRP
2w59A            A.427.GLU*A.429.PHE
2w59A            A.461.PHE*B.461.PHE
2w59A         A.472.ARG*A.533.VALGLU
2w59A         A.367.ASP*A.365.SERLEU
2w59A         A.482.PHE*A.525.PHEPHE
2w59A         A.529.SERLYS*A.528.TYR
2qy0A         A.388.TYR*A.369.ASPPHE
2qy0A         A.390.HIS*A.367.ASNGLY
2qy0A         A.393.TYR*B.553.GLYPRO
2qy0A            A.394.TYR*A.367.ASN
2qy0A         A.365.LEUPRO*A.364.ASN
2qy0A         A.393.TYR*A.391.GLUPRO
2qy0A            A.314.ARG*D.588.HIS
2qy0A         A.444.ARG*B.648.THRASP
2qy0A         A.338.THRALA*A.337.PHE
2qy0A         A.379.ASN*A.360.GLYGLN
2qy0A            A.335.HIS*D.548.ASN
2qy0A         A.379.ASNTHR*A.358.ASP
2qy0A            A.301.PHE*A.325.TYR
2qy0A         A.377.GLYVAL*A.379.ASN
2iskA         A.109.GLU*A.109.GLUGLY
2iskA         A.169.PHE*A.167.SERILE
2iskA           A.66.TRP*A.64.GLNPRO
2iskA             A.81.TRP*A.112.ARG
2iskA          A.91.ALAALA*A.103.TYR
2iskA          A.31.ARG*A.201.GLUPRO
2iskA           A.35.ASPGLU*A.36.GLU
2iskA              A.64.GLN*A.62.PHE
2iskA              A.25.ARG*B.15.PHE
2iskA           A.77.ARG*A.73.GLNASP
2iskA              A.81.TRP*A.85.GLN
2iskA             A.99.ARG*A.209.TRP
1zupA            A.102.PHE*A.106.PHE
1zupA              A.35.GLU*A.37.ARG
1zupA            A.232.ARG*A.183.GLU
1zupA         A.216.GLYALA*A.204.PHE
1zupA            A.300.TYR*A.296.ARG
1zupA           A.22.GLNTHR*A.24.PHE
1zupA      A.179.ILEGLY*A.181.VALTHR
1zupA           A.78.TRP*A.79.ASPARG
1zupA         A.113.GLU*A.113.GLUVAL
4hylA           A.92.PHE*A.90.THRGLY
4hylA              A.95.PHE*B.95.PHE
4hylA           A.81.GLUGLU*A.85.ASP
4hylA              A.95.PHE*A.64.TYR
1p4tA        A.57.THRASP*A.55.PROSER
1p4tA             A.129.ARG*A.30.ARG
1p4tA           A.70.TYR*A.71.ASPPHE
1p4tA          A.116.TYR*A.77.PROVAL
1p4tA           A.40.LEUARG*A.36.ARG
1p4tA             A.129.ARG*A.85.ARG
1p4tA           A.26.GLYPHE*A.52.TYR
1p4tA          A.112.THRGLY*A.81.TYR
1p4tA            A.34.GLYTYR*A.7.TYR
1p4tA           A.98.SERASP*A.94.ASP
1p4tA          A.113.GLYVAL*A.81.TYR
1p4tA           A.6.PHETYR*A.155.PHE
1p4tA         A.129.ARGTYR*A.128.TYR
1p4tA           A.49.TYR*A.50.LYSASN
1p4tA             A.41.ARG*A.152.ARG
1p4tA         A.130.TYR*A.131.ASNTYR
1qexA         A.245.GLUGLU*A.246.GLU
1qexA           A.70.HIS*A.68.GLNLYS
1qexA         A.210.ASP*A.208.SERVAL
1qexA             A.2.PHE*A.3.ILEGLN
1qexA           A.43.GLYASP*A.66.TYR
1qexA         A.192.PHEHIS*A.260.TYR
1qexA           A.39.TYRASN*A.59.GLN
1qexA           A.83.THRARG*A.85.HIS
1qexA           A.67.TYRGLN*A.66.TYR
1re5A           A.95.GLU*A.93.VALPRO
1re5A            A.175.ARG*B.232.ARG
1re5A          A.108.ASPALA*A.31.PHE
1re5A          A.117.GLN*A.23.GLYARG
1re5A         A.430.TYR*B.200.ALAALA
1re5A         A.133.ALAASP*A.445.HIS
1re5A         A.168.GLYVAL*B.229.GLN
1re5A         A.363.GLNGLY*A.401.HIS
1re5A            A.313.HIS*B.253.ASP
1re5A            A.324.TRP*A.321.HIS
1re5A            A.232.ARG*B.175.ARG
1re5A         A.171.GLYALA*A.175.ARG
1re5A         A.446.GLNARG*A.447.ARG
1re5A              A.6.PHE*D.324.TRP
1re5A         A.433.GLNALA*A.437.TRP
1re5A            A.182.GLU*B.182.GLU
1re5A         A.313.HISGLU*A.314.GLU
1re5A         A.404.ALAVAL*A.400.ARG
1re5A         A.363.GLN*A.400.ARGHIS
1re5A         A.229.GLN*B.168.GLYVAL
1re5A         A.262.ALAGLY*A.354.ARG
1re5A           A.22.ARG*A.22.ARGGLY
1re5A            A.389.GLU*A.385.HIS
1re5A              A.324.TRP*D.6.PHE
1re5A         A.200.ALAALA*B.430.TYR
1re5A            A.107.GLN*A.320.TRP
2vqcA           A.71.TRP*A.57.GLUCYS
2vqcA              A.71.TRP*A.19.GLU
2qkwA         A.120.ARG*A.116.TRPSER
2qkwA          A.86.GLN*A.101.LEUPRO
2qkwA           A.88.ARG*A.84.ASPMET
2qkwA          A.47.ALAGLY*A.116.TRP
2qkwA              A.56.PHE*A.55.GLU
4xs5A           A.38.ARG*A.34.ARGSER
4xs5A            A.119.PHE*A.118.GLU
3m3pA           A.76.ARG*A.72.LEUALA
3m3pA         A.128.LEUGLY*A.231.HIS
3m3pA           A.15.GLU*A.56.GLYGLY
3m3pA            A.113.TRP*A.221.ARG
3m3pA            A.158.HIS*A.157.GLU
3m3pA         A.120.HISVAL*A.131.TRP
3m3pA            A.250.HIS*A.248.HIS
3m3pA           A.35.ARG*A.12.SERALA
3m3pA           A.37.ASP*A.11.PHESER
3m3pA            A.127.TRP*A.235.ARG
3m3pA         A.155.ARG*A.155.ARGSER
3m3pA      A.106.SERPRO*A.108.HISALA
3m3pA            A.120.HIS*A.131.TRP
3m3pA         A.115.ARGALA*A.117.TRP
3m3pA          A.18.GLYHIS*A.180.GLN
3m3pA            A.140.HIS*A.174.GLN
3m3pA         A.137.PHE*A.138.GLUTRP
3m3pA             A.19.HIS*A.226.ASN
3m3pA         A.226.ASNARG*A.227.ARG
4tw1B            B.303.TRP*B.253.ASN
4tw1B         B.275.ASNARG*B.101.ASN
4tw1B           B.55.ASPGLU*B.54.TYR
4tw1B         B.173.GLNGLN*C.111.ARG
4tw1B         B.293.GLN*B.292.GLYGLN
4tw1B         B.233.TYR*C.184.ARGGLN
4tw1B         B.282.ALAPRO*B.281.TYR
4tw1B         B.243.PHE*B.244.ASNPRO
4tw1B         B.166.SERLYS*B.165.TYR
4tw1B            B.321.TYR*B.112.HIS
4tw1B      B.319.LYSPRO*B.292.GLYGLN
4tw1B         B.191.TRPSER*B.190.HIS
4tw1B             B.268.ARG*B.90.ASN
4tw1B           B.88.HISSER*B.90.ASN
4tw1B         B.214.TYR*B.215.ARGASN
4tw1B         B.203.GLUVAL*B.200.TYR
4tw1B            B.235.TYR*B.213.PHE
4tw1B              B.75.ASP*A.23.ARG
4tw1B             B.96.HIS*B.104.TRP
4tw1B         B.116.GLNVAL*B.115.PHE
4tw1B          B.88.HIS*C.159.GLNSER
4tw1B            B.191.TRP*B.247.PHE
4tw1B         B.276.ARG*B.100.LYSASN
2wuhA        A.41.ILEPRO*A.39.GLYGLN
2wuhA             A.86.PHE*A.165.ARG
2wuhA         A.114.PHE*A.146.ASNPRO
2wuhA            A.148.TYR*A.146.ASN
2wuhA           A.86.PHELEU*A.72.TRP
2wuhA             A.110.HIS*B.23.PHE
2wuhA        A.74.PROGLU*A.51.GLNTRP
2wuhA      A.155.LEUGLU*A.157.PROPRO
2wuhA        A.71.ALATRP*A.60.TYRGLY
2wuhA         A.106.HIS*A.108.GLYGLY
2wuhA         A.114.PHE*A.145.SERASN
2wuhA           A.48.ALASER*A.86.PHE
2wuhA           A.67.GLUGLY*A.60.TYR
2wuhA           A.72.TRP*A.73.CYSPRO
2wuhA             A.90.ASP*A.163.PHE
2wuhA         A.132.TRP*A.133.ARGASN
2wuhA            A.103.GLN*A.179.ARG
2wuhA            A.129.TRP*A.165.ARG
3flkA         A.151.ASNTHR*B.165.ARG
3flkA         A.318.GLUARG*A.322.ARG
3flkA         A.264.GLYILE*A.298.ASN
3flkA             A.19.GLU*A.295.ASN
3flkA         A.166.ARG*B.153.GLUASN
3flkA           A.52.TYR*A.56.GLYLYS
3flkA               A.70.TYR*A.7.ARG
3flkA         A.135.GLU*A.135.GLUASN
3flkA            A.104.TYR*A.170.ARG
3flkA         A.244.ALASER*A.203.TRP
3flkA           A.97.PHE*A.93.SERLEU
3flkA         A.187.VALTHR*A.186.HIS
3flkA      A.126.GLYASP*A.128.ILEASP
3flkA            A.312.PHE*A.275.ARG
3flkA            A.223.HIS*A.194.ASN
3flkA            A.311.GLU*A.324.HIS
3flkA         A.165.ARG*B.151.ASNTHR
3flkA          A.35.HIS*A.322.ARGALA
3flkA          A.97.PHEARG*A.103.GLN
3flkA         A.246.ASNLEU*A.141.TYR
3flkA            A.315.GLN*A.275.ARG
3flkA          A.15.GLYILE*A.292.PHE
3flkA              A.51.TYR*A.55.HIS
3flkA            A.165.ARG*A.206.ARG
3flkA           A.75.PHE*A.76.GLYALA
3flkA         A.176.PHEASP*A.214.TYR
3flkA         A.274.GLUARG*A.276.ASN
3rtyA         A.253.TYR*A.254.THRTHR
3rtyA            A.430.HIS*A.429.HIS
3rtyA            A.460.ARG*A.429.HIS
3rtyA      A.499.PROLYS*A.501.GLNCYS
3rtyA         A.253.TYR*B.556.LEUALA
3rtyA            A.269.TRP*A.277.PHE
3rtyA         A.449.THRALA*A.540.ARG
3rtyA            A.394.ARG*A.403.HIS
3rtyA         A.414.TYR*A.412.LEUGLY
3rtyA         A.479.VALASN*A.478.PHE
3rtyA      A.449.THRALA*A.447.GLYGLN
3rtyA         A.493.HISARG*A.391.PHE
3rtyA            A.394.ARG*A.488.PHE
2ijrA              A.4.TRP*A.210.GLN
2ijrA         A.116.TRP*A.150.GLYALA
2ijrA          A.13.GLYARG*A.220.ASN
2ijrA         A.116.TRP*A.116.TRPGLU
2ijrA         A.262.GLYTYR*A.253.TYR
2ijrA        A.52.LEULYS*A.50.GLYILE
2ijrA            A.266.TYR*A.271.HIS
2ijrA              A.7.ASN*A.226.PHE
2ijrA         A.261.ARGGLY*A.253.TYR
2ijrA            A.129.GLN*A.133.ARG
2ijrA          A.24.TRP*A.167.CYSASP
2ijrA         A.147.HIS*A.148.ILEASN
2ijrA             A.42.ARG*A.154.TRP
2ijrA           A.4.TRP*A.228.SERPRO
2ijrA         A.264.ASPCYS*A.263.TYR
2ijrA             A.39.GLN*A.106.TYR
2ijrA           A.81.PHE*A.52.LEULYS
2ijrA           A.95.ASP*A.93.VALLEU
2ijrA      A.262.GLYTYR*A.276.GLUTYR
2ijrA         A.255.GLU*A.255.GLUPRO
2ijrA      A.147.HISILE*A.145.SERSER
2ijrA            A.135.TYR*A.139.PHE
2ijrA           A.43.LEUPHE*A.84.TRP
2ijrA           A.49.ALAGLY*A.69.HIS
3hr8A           A.94.PHE*A.95.ILEASP
3hr8A         A.266.TYR*A.240.ILEGLY
3hr8A      A.250.LYSASN*A.248.ILEVAL
3hr8A         A.296.THRTHR*A.295.TYR
3hr8A           A.99.HIS*A.97.ALAGLU
3hr8A         A.262.THRTYR*A.263.TYR
3hr8A          A.225.METGLU*A.67.PHE
3hr8A            A.307.GLN*A.292.TRP
3hr8A            A.315.PHE*A.319.ASN
3hr8A         A.328.ARG*A.324.GLYGLU
3hr8A        A.27.ILEMET*A.25.GLYSER
4r3oK              K.70.ARG*D.85.ASN
4r3oK       K.50.ALAGLY*L.118.GLYASN
4r3oK             K.73.TYR*C.142.HIS
4r3oK            K.170.ARG*Z.136.TYR
4r3oK              K.55.GLN*L.88.TYR
4r3oK             K.4.LEUILE*K.3.TYR
4r3oK      K.173.LEUASN*Y.173.LEUASN
4r3oK           K.27.GLN*K.27.GLNMET
4r3oK         K.117.TYR*K.118.METASP
4r3oK             K.71.ASN*C.109.GLN
4r3oK            K.117.TYR*K.132.HIS
4r3oK            K.145.ARG*Z.158.ARG
4r3oK         K.147.TYR*K.148.THRPRO
4r3oK           K.65.GLNLEU*D.92.GLN
4r3oK         K.144.ASPARG*Z.162.GLN
4r3oK         K.171.PHE*K.134.TYRGLY
4r3oK         K.107.TYR*K.112.GLYPRO
4r3oK            K.145.ARG*K.146.TYR
3tytA            A.492.ARG*A.501.HIS
3tytA            A.474.PHE*A.397.PHE
3tytA            A.554.GLU*A.442.PHE
3tytA            A.491.ASN*A.482.PHE
3tytA         A.563.GLNMET*A.562.TYR
3tytA         A.542.GLYLEU*A.502.PHE
3tytA         A.503.PHE*A.576.LYSLEU
3tytA         A.388.GLNSER*A.465.GLU
3tytA            A.479.ASN*A.561.HIS
3tytA            A.395.ARG*A.558.PHE
3tytA         A.546.TRP*A.551.ASPALA
3tytA         A.385.GLYLEU*A.444.GLN
3tytA            A.405.ASN*A.480.ASN
3tytA         A.541.SERGLY*A.502.PHE
3tytA            A.566.ASN*A.573.TYR
3tytA            A.561.HIS*A.560.ASN
3tytA         A.440.PHE*A.444.GLNLYS
3tytA         A.403.TYRGLY*A.482.PHE
3tytA         A.471.TYR*A.472.LYSASP
4a2vA            A.915.ASN*A.911.TRP
4a2vA            A.886.ASN*A.885.ASP
4a2vA         A.921.PHE*A.922.ASPVAL
4a2vA      A.849.HISLYS*A.861.LYSSER
4a2vA            A.818.TYR*A.843.ARG
4a2vA         A.819.ALACYS*A.818.TYR
4a2vA            A.855.PHE*A.856.ASP
4a2vA            A.832.HIS*A.858.PHE
4r1kA           A.74.ARG*A.70.LEUASP
4r1kA      A.153.TRPGLY*A.155.GLULYS
4r1kA           A.96.GLN*A.95.GLYGLN
4r1kA       A.110.HISPRO*A.92.LYSGLY
4r1kA             A.63.ASP*B.161.ARG
4r1kA              A.65.TYR*A.64.ASN
4r1kA             A.161.ARG*A.65.TYR
4r1kA         A.115.PHE*A.123.TYRTHR
1m06G             G.51.TYR*G.166.ARG
1m06G            G.9.HIS*G.10.ASPTHR
1m06G         G.102.PHE*G.152.PHEVAL
1m06G           G.18.PHE*G.19.SERVAL
1m06G            G.101.ARG*G.145.ARG
1m06G          G.53.ASN*G.165.GLYARG
1m06G         G.158.SERSER*G.162.TRP
1m06G            G.83.ALAGLY*G.9.HIS
3afhA         A.373.LEUSER*A.343.TRP
3afhA            A.234.PHE*A.236.TRP
3afhA         A.286.TRP*A.287.ARGVAL
3afhA             A.268.ARG*A.85.TRP
3afhA            A.346.TYR*A.268.ARG
3afhA            A.472.ARG*A.358.TYR
3afhA           A.75.TYR*A.34.THRGLY
3afhA         A.388.TYR*A.453.THRGLY
3afhA         A.234.PHEGLY*A.236.TRP
3afhA         A.171.ASP*A.241.PHEMET
3afhA          A.92.GLUGLY*A.103.TYR
3afhA         A.364.ARG*A.364.ARGILE
3afhA         A.303.PHE*A.304.ASPPRO
3afhA         A.176.TYR*A.177.METGLU
3afhA         A.103.TYR*A.100.PHEGLY
3afhA         A.108.ARGLEU*A.112.TYR
3afhA         A.161.LYSVAL*A.160.PHE
3afhA         A.421.TRP*A.469.GLYLYS
3afhA            A.390.TYR*A.483.PHE
3afhA         A.388.TYR*A.452.VALTHR
3afhA      A.134.ASPPRO*A.132.LYSGLU
3afhA            A.236.TRP*A.207.HIS
3afhA         A.179.PHE*A.180.ASPASN
3afhA           A.78.GLN*A.78.GLNILE
3afhA            A.381.TYR*A.385.ASN
3afhA             A.64.GLU*A.105.GLN
3afhA             A.73.ARG*A.104.ARG
3afhA         A.165.GLYLYS*A.181.ASN
3afhA         A.394.TYR*A.450.GLYALA
3afhA          A.93.GLYPRO*A.103.TYR
3afhA         A.402.GLU*A.402.GLUGLU
2ef0A              A.39.ARG*A.69.HIS
2ef0A         A.267.GLUGLU*A.222.TRP
2ef0A         A.232.GLU*A.232.GLULYS
2ef0A              A.76.TYR*A.60.ARG
2ef0A           A.38.TYR*A.39.ARGGLY
2ef0A         A.194.GLYLEU*A.198.ARG
2ef0A         A.163.GLYASN*A.162.ASP
2ef0A         A.159.TRP*A.160.VALGLY
2ef0A         A.202.PHE*A.203.PHETHR
2ef0A         A.259.HIS*A.219.THRASP
2ef0A         A.203.PHE*A.204.THRHIS
2ef0A         A.141.ASP*A.137.GLNALA
2ef0A            A.238.PHE*A.222.TRP
2ef0A          A.15.PHESER*A.172.GLU
2ef0A         A.159.TRP*A.218.TYRTHR
2ef0A            A.252.ARG*A.215.HIS
1dleA             A.99.TYR*A.215.TRP
1dleA           A.29.TRP*A.27.GLNPRO
1dleA           A.27.GLN*A.26.LYSGLN
1dleA            A.227.PHE*A.215.TRP
1dleA         A.166.GLYSER*A.170.ARG
1dleA       A.103.VALALA*A.55.ALAALA
1dleA           A.39.HIS*A.37.LYSGLY
1dleA            A.202.HIS*A.207.PHE
1dleA          A.38.GLYHIS*B.192.ARG
1dleA           A.94.TYR*A.56.ALAHIS
1dleA            A.101.TYR*A.100.ASP
1dleA         A.238.LEULYS*A.249.PHE
4k6wA         A.343.TRP*A.242.LYSSER
4k6wA         A.267.TRP*A.186.LEUTRP
4k6wA         A.226.VALALA*A.231.HIS
4k6wA         A.358.THRPHE*A.357.PHE
4k6wA         A.359.PHE*A.219.ALAASN
4k6wA         A.268.ASNPHE*A.275.ASN
4m0mA      A.269.PROSER*A.271.VALGLY
4m0mA      A.413.GLYILE*A.361.GLULYS
4m0mA         A.415.ASPARG*A.364.HIS
4m0mA            A.604.GLN*A.530.HIS
4m0mA              A.26.HIS*A.57.ASP
4m0mA            A.448.HIS*A.186.TYR
4m0mA            A.356.PHE*A.360.PHE
4m0mA            A.640.TYR*A.665.HIS
4m0mA         A.416.ARGASP*A.364.HIS
4m0mA         A.322.GLUARG*A.321.HIS
4m0mA         A.508.HIS*A.623.HISTYR
4m0mA            A.516.TYR*A.564.TYR
4m0mA         A.430.ARG*A.511.PROASN
4m0mA         A.456.ASNGLU*A.445.TYR
4m0mA         A.155.ASNLEU*A.184.HIS
4m0mA            A.561.GLN*A.433.TYR
4m0mA            A.665.HIS*A.644.ASN
4m0mA              A.20.PHE*A.56.PHE
4m0mA         A.234.GLU*A.234.GLUHIS
4m0mA         A.216.TYR*A.211.GLNHIS
4m0mA         A.106.ASN*A.104.THRGLY
4m0mA            A.158.TYR*A.635.GLN
4m0mA              A.70.ASP*A.27.ARG
4m0mA         A.639.GLYTYR*A.643.ARG
4m0mA         A.175.PROGLY*A.145.ARG
4m0mA         A.344.HIS*A.303.LEUCYS
4m0mA      A.412.SERGLY*A.359.PHEPHE
4m0mA            A.235.HIS*A.143.PHE
4m0mA         A.202.HISGLU*A.204.TYR
4m0mA              A.78.TYR*A.54.ARG
4m0mA            A.397.PHE*A.359.PHE
4m0mA            A.215.ARG*A.180.ARG
4m0mA            A.568.ARG*A.626.GLU
4m0mA           A.26.HIS*A.62.GLUPRO
4m0mA         A.313.TYRALA*A.202.HIS
4m0mA           A.78.TYR*A.79.ASNPRO
4m0mA         A.693.ASNALA*A.697.ARG
4m0mA         A.605.LYSTHR*A.597.PHE
4m0mA         A.589.ARG*A.585.ASNGLN
4m0mA         A.168.LEUPHE*A.261.PHE
4m0mA            A.208.PHE*A.205.ARG
4bu0A            A.141.HIS*A.167.TRP
4bu0A           A.36.TYR*A.37.ARGSER
4bu0A           A.45.THRHIS*A.46.HIS
4bu0A         A.158.TRP*A.136.THRARG
4bu0A            A.121.GLU*A.131.PHE
4bu0A         A.33.GLYALA*A.7.LEULYS
4bu0A         A.147.SERSER*A.152.TYR
4bu0A         A.132.CYSPRO*A.131.PHE
4bu0A            A.182.TYR*A.181.GLN
4bu0A         A.183.PHE*A.166.GLUTRP
2qjfA         A.389.TRPASN*A.391.ASP
2qjfA            A.419.GLN*A.506.HIS
2qjfA         A.347.ARG*B.537.TYRGLU
2qjfA         A.498.ALAGLY*A.537.TYR
2qjfA         A.407.PHE*A.403.LEULYS
2qjfA         A.576.ASPSER*A.575.TYR
2qjfA         A.238.TYR*A.271.ALAGLU
2qjfA            A.263.ASP*A.260.ASN
2qjfA         A.471.GLN*A.471.GLNHIS
2qjfA            A.356.TRP*A.355.GLN
2qjfA         A.416.PHE*A.448.VALLEU
2qjfA         A.518.TYR*A.519.ILEVAL
2qjfA         A.426.ASN*A.605.PHEMET
2qjfA         A.376.LEUILE*A.344.PHE
2qjfA         A.388.TYRTRP*A.390.ASN
2qjfA         A.537.TYRGLU*B.347.ARG
2qjfA         A.457.TRP*A.458.THRLYS
2qjfA      A.353.ALAARG*B.353.ALAARG
2qjfA         A.344.PHE*A.283.ARGGLU
2qjfA            A.425.HIS*A.428.HIS
2qjfA      A.304.LEUSER*A.294.ASPCYS
2qjfA         A.565.TYR*A.566.ASNLYS
2qjfA            A.330.TYR*A.331.GLU
1wteA            A.198.TYR*A.206.TRP
1wteA                A.5.GLU*A.2.ASN
1wteA         A.127.ALAGLY*A.164.TYR
1wteA              A.98.ASN*A.94.TYR
1wteA          A.95.ARG*A.106.PHEASP
1wteA           A.49.LEUASN*A.44.PHE
1wteA          A.40.THRPRO*A.263.TRP
1wteA         A.251.ASN*A.247.ALALYS
1wteA          A.35.ILEASN*B.164.TYR
1wteA           A.64.LEUMET*A.68.HIS
1wteA         A.217.TRP*A.213.GLUTHR
1wteA          A.224.ARGALA*A.11.GLN
1wteA           A.2.ASNLYS*A.217.TRP
1wteA           A.67.GLYHIS*A.21.ARG
1wteA         A.110.ASPHIS*A.111.HIS
1m07A           A.6.PHE*A.101.PROVAL
1m07A                A.7.GLN*A.3.TRP
1m07A         A.103.HIS*A.104.PHEALA
3n27A              A.20.GLU*B.68.TRP
3n27A        A.17.SERTHR*B.68.TRPILE
3n27A           A.68.TRP*C.20.GLUALA
3n27A           A.20.GLUALA*B.68.TRP
3gmvX           X.27.GLYGLU*X.22.TRP
3gmvX             X.151.ARG*X.85.TYR
3gmvX         X.139.ALASER*X.141.PHE
3gmvX       X.130.ALAALA*X.78.PROSER
3gmvX           X.54.GLYGLY*X.56.PHE
3gmvX         X.153.GLNARG*X.152.TYR
3gmvX           X.83.SERHIS*X.87.ARG
3gmvX         X.151.ARGTYR*X.150.TYR
3gmvX            X.122.PHE*X.113.TYR
3gmvX              X.71.TYR*X.70.GLU
3gmvX         X.153.GLN*X.153.GLNARG
2q0sA          A.22.GLYALA*G.174.PHE
2q0sA           A.40.GLN*A.40.GLNGLN
2q0sA         A.143.ALAPRO*A.158.GLU
2q0sA         A.189.ASP*A.187.SERTHR
2q0sA           A.94.ASN*A.55.ALAARG
2q0sA         A.179.PHE*A.180.PHEASP
2q0sA              A.33.ARG*A.27.ARG
2q0sA              A.73.TYR*H.73.TYR
2q0sA         A.181.ASPALA*A.180.PHE
2q0sA           A.26.GLU*A.25.THRGLU
2q0sA         A.168.TYRSER*A.179.PHE
2q0sA              A.27.ARG*A.14.TRP
2q0sA               A.56.ARG*A.8.PHE
2q0sA             A.16.TRP*A.195.HIS
2q0sA          A.174.PHE*C.22.GLYALA
1ddjA         A.790.ASNASN*A.791.ASN
1ddjA         A.673.VALVAL*A.672.TYR
1ddjA      A.589.GLYGLY*A.742.GLYGLY
1ddjA         A.575.TRP*A.573.TRPPRO
1ddjA         A.716.LEUASN*A.719.ARG
1ddjA         A.641.GLU*A.641.GLUPRO
1ddjA         A.551.PROGLN*A.552.GLN
1ddjA         A.789.ARG*A.785.GLUGLY
1ddjA         A.659.THRASP*A.546.PHE
1ddjA         A.637.ARGLEU*A.639.PHE
1ddjA      A.573.TRPPRO*A.571.HISSER
1ddjA            A.676.ASP*A.706.GLU
3ntuA         A.269.ALAGLU*A.270.GLU
3ntuA           A.42.GLU*A.42.GLUGLY
3ntuA         A.151.GLUGLY*A.181.ARG
3ntuA         A.154.PHE*A.155.ARGPRO
3ntuA            A.124.ASN*A.127.PHE
3ntuA         A.127.PHELEU*A.129.PHE
3ntuA            A.103.PHE*A.286.PHE
3ntuA         A.296.ARGVAL*A.313.PHE
3ntuA            A.183.TYR*A.181.ARG
3ntuA            A.301.TYR*A.287.PHE
2x78A            A.139.TYR*A.243.TYR
2x78A         A.160.ALAPRO*A.141.TYR
2x78A            A.266.HIS*A.270.PHE
2x78A         A.131.GLYPRO*A.141.TYR
2x78A            A.126.PHE*A.224.ASN
2x78A            A.270.PHE*B.270.PHE
2x78A         A.258.SERPRO*A.257.TYR
2x78A         A.122.PHEASP*A.180.ARG
2x78A         A.205.HIS*A.206.LEUGLU
2x78A            A.152.PHE*A.254.ASN
2x78A         A.154.TRPLEU*A.156.TYR
3mmgA           A.29.SERGLU*A.28.HIS
3mmgA         A.168.SERLEU*A.167.HIS
3mmgA         A.203.PHE*A.204.ASNALA
3mmgA         A.201.TRP*A.202.LYSPHE
3mmgA           A.160.ASPGLY*A.9.ARG
3mmgA              A.31.ARG*A.22.GLU
3mmgA         A.121.VALSER*A.117.GLN
3mmgA            A.171.HIS*A.174.ASN
3mmgA           A.64.PHE*A.62.GLYGLU
3mmgA          A.99.LYSPHE*A.162.ASN
3mmgA         A.177.ASNTYR*A.142.HIS
3mmgA            A.143.TRP*A.141.GLN
3mmgA         A.134.LYSGLU*A.133.HIS
3mmgA              A.28.HIS*A.50.ARG
3mmgA               A.46.HIS*C.6.PHE
3mmgA          A.12.ASN*B.121.VALSER
3mmgA          A.45.GLNHIS*A.203.PHE
3mmgA            A.160.ASP*A.162.ASN
2q6tA         A.396.TYR*A.397.ARGASP
2q6tA         A.418.GLN*A.421.GLYPRO
2q6tA         A.187.PHELYS*A.191.ASP
2q6tA         A.141.GLYLYS*A.303.ARG
2q6tA         A.284.PROILE*A.286.TYR
2q6tA           A.74.ARGGLY*A.76.GLN
2q6tA         A.288.ASP*D.155.GLUALA
2q6tA         A.388.ASP*A.342.SERARG
2q6tA               A.41.TYR*A.8.HIS
2q6tA         A.350.ARG*B.239.METPRO
2q6tA         A.394.PHE*A.374.PROMET
2q6tA         A.254.ARGILE*A.434.HIS
2q6tA            A.309.ASN*A.286.TYR
2q6tA         A.431.HISALA*A.430.PHE
2q6tA            A.419.ARG*B.238.GLU
2q6tA      A.154.THRGLU*A.156.ALAARG
2q6tA         A.310.GLN*A.310.GLNVAL
2q6tA            A.397.ARG*A.430.PHE
2q6tA         A.300.ALAARG*A.304.ARG
2q6tA            A.155.GLU*B.301.ARG
2q6tA          A.110.TRP*A.38.GLUALA
2q6tA            A.396.TYR*A.373.ARG
2q6tA         A.124.ARG*A.124.ARGLEU
2q6tA           A.45.HISARG*A.40.PHE
2q6tA         A.381.GLUSER*A.335.GLN
2q6tA         A.155.GLUALA*B.288.ASP
3pfiA         A.109.ILEASP*A.108.PHE
3pfiA         A.304.ASNGLY*A.306.TYR
3pfiA         A.103.GLU*A.103.GLUGLY
3pfiA         A.210.ALALYS*A.183.ASP
3pfiA         A.111.GLUILE*A.113.HIS
3pfiA            A.124.TYR*A.171.ARG
3pfiA             A.48.ARG*B.228.ARG
3pfiA           A.48.ARG*A.44.ALAALA
3pfiA            A.300.TYR*A.214.ARG
1f9kA         A.223.HIS*A.221.GLUTHR
1f9kA         A.139.GLYILE*A.141.ASP
1f9kA         A.231.THRSER*A.230.PHE
1f9kA          A.87.ALAASP*A.221.GLU
1f9kA          A.88.ASP*A.105.GLYGLY
1f9kA          A.93.PHE*A.208.GLYLEU
1f9kA         A.128.GLN*A.133.PROGLN
1f9kA         A.121.ALAVAL*A.120.PHE
1f9kA               A.5.PHE*A.52.TYR
1f9kA         A.127.PHE*A.128.GLNASN
1f9kA            A.129.ASN*A.131.TRP
1f9kA         A.176.VALVAL*A.175.ASN
3q20A           A.54.GLUARG*A.55.ARG
3q20A           A.91.ARG*A.87.PROGLU
3q20A           A.62.ARG*A.58.GLUALA
3g9kD         D.300.GLU*D.300.GLUGLU
3g9kD          D.53.ALASER*F.501.GLN
3g9kD             D.49.TYR*F.527.ASN
3g9kD         D.245.LYSVAL*D.244.TYR
3g9kD         D.228.ARG*D.224.GLYGLY
3g9kD          D.114.GLU*D.95.GLYGLY
3g9kD           D.49.TYR*D.66.LEULYS
3g9kD            D.142.ASN*D.138.TYR
3g9kD          D.97.GLYGLY*D.112.TYR
3g9kD         D.110.ILEASP*D.109.PHE
3g9kD            D.179.ARG*F.373.ASN
3g9kD            D.172.ARG*F.374.PHE
2aamA         A.290.PROTYR*A.280.TYR
2aamA           A.90.VALASN*A.89.TYR
2aamA      A.269.SERPHE*B.269.SERPHE
2aamA         A.245.GLUTYR*A.249.ARG
2aamA            A.126.PHE*A.163.TYR
2aamA          A.254.GLYLYS*A.31.PHE
2aamA         A.256.PHE*A.220.SERGLY
2aamA          A.30.TRP*A.286.ASNGLY
2aamA         A.135.LYSGLU*A.139.PHE
2aamA         A.103.LYSGLU*A.102.TRP
2aamA         A.281.GLULYS*A.285.ARG
2aamA         A.128.LYSTYR*A.130.TRP
2aamA         A.300.ASP*A.298.GLULEU
2aamA            A.100.PHE*A.144.ARG
2aamA            A.161.PHE*A.162.GLU
2aamA         A.246.TYR*A.205.GLUASN
2aamA            A.265.ASP*A.272.ASN
2aamA         A.292.ALAALA*A.291.TYR
2aamA         A.222.TRP*A.201.PROGLN
2aamA         A.111.PROGLU*A.113.TRP
2aamA           A.71.TYR*A.62.SERLYS
2aamA            A.225.GLU*A.202.GLN
2aamA            A.112.GLU*D.133.GLU
3dkzA       A.102.THRPRO*A.99.ARGGLY
3dkzA           A.58.HIS*A.59.SERGLY
3dkzA          A.159.PHE*A.94.LEUGLY
3dkzA         A.132.ARG*A.133.ARGGLY
4prkA            A.268.PHE*A.264.GLU
4prkA            A.135.ASN*B.299.PHE
4prkA         A.176.ASPVAL*A.175.TYR
4prkA         A.221.PHE*A.243.ALALEU
4prkA            A.313.ARG*A.325.HIS
4prkA           A.91.TYR*A.62.TYRLYS
4prkA      A.216.ILEGLY*A.214.ASNMET
4prkA         A.313.ARG*A.313.ARGASP
4prkA         A.179.TYR*A.180.ASNPRO
4prkA            A.116.TYR*B.116.TYR
4prkA           A.98.VALPRO*A.97.ASN
4prkA         A.299.PHE*B.135.ASNPRO
4c2eA        A.82.GLYMET*B.78.GLYALA
4c2eA         A.190.PHE*A.188.LEUSER
4c2eA         A.195.ALAGLU*A.112.GLU
4c2eA         A.422.PHE*A.393.LYSVAL
4c2eA         A.220.SERTHR*A.252.ASN
4c2eA         A.169.GLYLYS*A.111.PHE
4c2eA         A.168.ARGGLY*A.194.ARG
4c2eA         A.201.THRVAL*A.203.PHE
4c2eA         A.322.GLYHIS*A.324.TYR
4c2eA      A.413.PHEASP*A.408.LEULYS
4c2eA         A.338.GLN*A.337.VALGLN
4c2eA            A.421.TYR*B.421.TYR
4c2eA          A.280.ARG*B.64.ASNGLU
4c2eA        A.78.GLYALA*B.82.GLYMET
4c2eA         A.335.GLYTHR*A.356.TRP
4c2eA           A.94.TYR*A.95.METASP
4c2eA            A.360.ASN*A.320.GLU
4c2eA         A.287.TYRPHE*A.274.TYR
4c2eA            A.224.GLU*A.225.HIS
4c2eA         A.235.ARG*A.231.ALALYS
4c2eA         A.421.TYR*A.422.PHESER
1n8yC           C.95.LEUASP*C.97.ASN
1n8yC        C.14.PROALA*C.16.SERPRO
1n8yC         C.434.LEUARG*C.500.TRP
1n8yC         C.533.TYR*C.556.PHEGLY
1n8yC            C.524.ARG*C.515.ARG
1n8yC         C.470.GLNALA*C.465.PHE
1n8yC           C.65.ALAHIS*C.67.ASN
1n8yC           C.85.LEUPHE*C.61.TYR
1n8yC          C.90.TYR*C.132.VALLEU
1n8yC         C.156.ASN*C.128.LEULYS
1n8yC         C.142.TYR*C.185.GLYGLU
1n8yC         C.262.HIS*C.263.ASNPRO
1n8yC      C.412.GLYARG*C.414.ILELEU
1n8yC           C.51.PHE*C.49.LEUSER
1n8yC         C.603.GLNPRO*C.595.TYR
1n8yC         C.148.TRPLYS*C.152.PHE
1n8yC        C.417.ASPGLY*C.8.ASPMET
1n8yC            C.417.ASP*C.416.HIS
1n8yC         C.303.ALAGLU*C.305.ASP
1n8yC         C.516.GLYGLN*C.517.GLN
1n8yC            C.439.GLU*C.466.ARG
1n8yC           C.24.LEUARG*C.51.PHE
1n8yC         C.526.TRPLYS*C.531.ARG
1n8yC         C.298.ASN*C.311.GLULYS
1n8yC         C.581.SERGLY*C.593.TRP
1n8yC         C.532.GLU*C.539.CYSLEU
1n8yC            C.390.TYR*C.416.HIS
1n8yC         C.557.GLYSER*C.533.TYR
1n8yC         C.558.SERGLU*C.559.GLU
1n8yC            C.405.GLN*C.435.ARG
1n8yC         C.281.ASN*C.441.GLYSER
1n8yC         C.121.LEUARG*C.184.TRP
1n8yC         C.461.TRPASP*C.465.PHE
1n8yC         C.501.GLYPRO*C.455.PHE
1n8yC              C.37.ASN*C.61.TYR
3v0sA        A.16.LEUGLY*A.14.SERLYS
3v0sA            A.3.ARG*A.13.VALSER
3v0sA           A.80.GLN*A.79.ILEGLN
3v0sA             A.119.TYR*A.76.ARG
3v0sA           A.18.PHE*A.19.GLYCYS
3v0sA         A.177.ILEGLU*A.204.TYR
3v0sA          A.123.PHE*A.84.LYSPHE
3v0sA         A.114.ARG*A.110.ALASER
3v0sA            A.266.TRP*A.270.GLN
2o66A           A.45.ARG*B.41.VALSER
2o66A           A.20.ARG*A.99.GLYASP
3n7cA         A.516.PHE*A.517.ASPSER
3n7cA         A.554.HIS*A.555.VALLEU
4igdA         A.576.GLYPRO*A.685.HIS
4igdA         A.545.ASPPRO*A.544.TYR
4igdA         A.538.THRTHR*A.537.HIS
4igdA            A.380.PHE*A.385.ASN
4igdA         A.421.METASN*A.412.TYR
4igdA            A.522.TRP*A.525.ARG
4igdA         A.380.PHE*A.385.ASNLEU
4igdA         A.462.TRP*A.460.THRPRO
4igdA         A.375.HISGLY*A.398.GLN
4igdA         A.668.TRPGLY*A.549.PHE
4igdA         A.543.GLN*A.542.PROGLN
4igdA         A.489.ALAHIS*A.544.TYR
4igdA            A.375.HIS*A.402.TYR
4igdA         A.564.LEUASN*A.401.TYR
4igdA         A.345.PHE*A.346.GLNILE
4igdA            A.333.TYR*A.309.HIS
4igdA         A.636.GLUGLY*A.677.ARG
4igdA      A.476.GLYGLY*A.647.GLYGLY
4igdA         A.330.ASP*A.309.HISGLY
4igdA         A.652.THRLEU*A.660.TRP
4igdA            A.567.PHE*A.529.ASN
1pgl2              2.43.ARG*2.50.PHE
1pgl2          2.147.HIS*2.45.ASPLEU
1pgl2         2.196.TRP*2.198.GLYLYS
1pgl2         2.346.VALLYS*2.196.TRP
1pgl2             2.97.ARG*1.135.TRP
1pgl2          2.146.PHE*2.93.ASNSER
1pgl2           2.35.ASN*2.33.PROLYS
1pgl2         2.342.PHE*2.259.LYSCYS
1pgl2      2.190.PROPHE*2.188.GLNASN
1pgl2      2.359.LEUASN*2.239.TRPARG
1pgl2            2.140.PHE*2.130.ASN
1pgl2         2.192.VALLEU*2.191.PHE
1pgl2          2.82.GLUASN*2.257.TYR
1pgl2         2.268.PHE*2.323.CYSPRO
1pgl2            2.241.TYR*2.240.ARG
2gy5A      A.173.ILELEU*A.171.PROASP
2gy5A         A.201.SERALA*A.203.PHE
2gy5A         A.178.LEUPRO*A.177.HIS
2gy5A            A.229.ASN*A.246.PHE
2gy5A         A.398.PHE*A.399.ASNHIS
2gy5A         A.358.HISILE*A.360.GLU
2gy5A           A.49.TRP*A.23.ALAMET
2gy5A         A.237.THRGLY*A.216.TRP
2gy5A         A.379.THRASN*A.398.PHE
2gy5A         A.420.GLYVAL*A.438.ASN
2gy5A         A.293.TRP*A.274.CYSLYS
2gy5A         A.297.GLNCYS*A.299.ASN
2gy5A            A.343.GLU*A.335.TRP
2gy5A         A.190.SERALA*A.143.PHE
2gy5A           A.49.TRPARG*A.82.TRP
2gy5A         A.266.GLUARG*A.260.PHE
2gy5A         A.161.PHE*A.163.HISSER
3l4fA         A.642.ASPGLU*D.735.HIS
4i9xA          A.33.PHEALA*D.133.ARG
4i9xA             A.122.HIS*B.61.GLU
4i9xA         A.194.ARGLEU*A.196.ARG
4i9xA         A.191.THRPRO*A.193.TRP
4i9xA             A.61.GLU*B.122.HIS
4i9xA         A.182.SERLEU*A.181.TYR
4i9xA          A.74.TRP*A.145.LEUARG
4i9xA          A.127.PHE*A.67.CYSTHR
4i9xA         A.125.GLN*A.124.GLYGLN
4i9xA            A.131.PHE*A.141.TYR
4i9xA            A.235.TRP*A.239.GLN
4i9xA             A.83.PHE*A.110.ARG
4i9xA         A.211.PHETYR*A.210.TYR
4i9xA         A.196.ARGASN*A.212.TYR
4i9xA         A.118.PHE*A.119.SERGLN
3udfA            A.376.ARG*A.313.TYR
3udfA         A.682.ALAGLY*A.540.TYR
3udfA         A.512.GLYLEU*A.535.GLN
3udfA            A.212.GLN*B.515.GLU
3udfA            A.390.GLN*A.298.ARG
3udfA            A.424.ARG*A.395.GLN
3udfA         A.684.PHE*A.543.PHEALA
3udfA         A.413.GLYGLY*A.244.TYR
3udfA         A.521.ASN*A.519.PROARG
3udfA            A.520.ARG*A.505.ARG
3udfA            A.557.ARG*A.269.TYR
3udfA         A.352.TYR*A.353.ARGASN
3udfA         A.693.TRP*A.694.VALGLY
3udfA         A.422.PHE*A.423.ASNARG
3udfA         A.297.TRP*A.299.GLYALA
3udfA            A.165.TYR*A.176.GLN
3udfA         A.354.ASNALA*A.352.TYR
3udfA         A.681.PHE*A.682.ALAGLY
3udfA            A.731.TRP*A.647.ARG
3udfA         A.250.ARG*A.250.ARGSER
3udfA         A.418.TYRGLN*A.313.TYR
3udfA             A.269.TYR*A.32.TYR
3udfA         A.215.TYR*A.213.LEUGLY
3udfA         A.343.TRP*A.363.SERARG
3udfA         A.567.TYR*A.568.GLUALA
3udfA         A.266.TYR*A.264.SERGLY
3udfA            A.348.TRP*A.293.ARG
3udfA         A.681.PHE*A.669.LYSTHR
3udfA            A.295.HIS*A.291.TYR
3udfA            A.367.GLN*A.364.ARG
3udfA            A.494.ARG*A.456.ASN
3udfA         A.684.PHE*A.667.GLYGLY
3udfA         A.348.TRP*A.346.METSER
3udfA      A.696.PHEASP*A.698.GLNPRO
3udfA         A.553.HIS*A.406.GLYSER
3udfA          A.43.GLYGLY*A.236.ARG
3udfA            A.144.TYR*B.257.PHE
3udfA             A.61.HIS*A.215.TYR
3udfA         A.243.PROTYR*A.417.PHE
3udfA          A.44.GLYLYS*A.153.ASN
3udfA         A.556.GLN*A.556.GLNARG
3udfA         A.397.GLN*A.397.GLNLEU
3isyA              A.41.GLN*A.64.PHE
3isyA              A.85.TRP*A.56.TYR
3isyA           A.56.TYR*A.57.ARGTYR
3isyA           A.80.ASPPHE*A.79.TYR
3isyA           A.80.ASP*A.78.THRTYR
3isyA          A.116.PHE*A.94.TYRGLU
3isyA              A.43.PHE*A.58.TYR
3isyA        A.38.SERTHR*A.67.ALAPHE
4qtoA         A.401.PHE*A.297.VALGLN
4qtoA         A.423.PHE*A.445.ASNASP
4qtoA           A.15.GLYGLU*A.12.TYR
4qtoA             A.32.TYR*A.320.ASN
4qtoA         A.231.PHE*A.232.THRGLY
4qtoA             A.114.ASN*D.70.GLU
4qtoA             A.70.GLU*D.114.ASN
4qtoA      A.204.GLYTHR*A.206.ILEASN
4qtoA         A.358.GLYLYS*A.372.PHE
4qtoA         A.476.TYR*A.169.PROALA
4qtoA         A.168.ALAPRO*A.119.PHE
4qtoA      A.439.LEUGLY*A.441.THRVAL
4qtoA         A.490.LEUVAL*A.492.ASN
4qtoA         A.359.LYSARG*A.372.PHE
4qtoA         A.118.TYR*A.452.ALAGLN
4qtoA         A.438.LYSLEU*A.459.TYR
4qtoA              A.33.ASN*A.35.GLU
4qtoA         A.443.TRP*A.448.HISPRO
4qtoA      A.392.PHEGLY*A.286.GLYGLN
4qtoA         A.466.ARG*A.457.GLYGLY
4qtoA            A.360.ARG*A.337.ARG
4qtoA         A.392.PHE*A.287.GLNVAL
4qtoA          A.72.ARG*A.173.THRGLY
4qtoA         A.401.PHEGLU*A.299.ASN
4qtoA         A.260.ASN*A.258.GLYLYS
4qtoA            A.266.ASP*A.298.GLN
4qtoA      A.468.LEUGLY*A.454.ALAPRO
3k25A         A.280.ALATRP*A.147.GLN
3k25A         A.233.PHE*A.216.PROARG
3k25A            A.156.ARG*A.271.TRP
3k25A      A.169.CYSARG*A.249.ASPTYR
3k25A          A.71.CYSGLY*A.256.TRP
3k25A            A.281.TRP*A.144.ARG
3k25A              A.61.ARG*A.52.ARG
3k25A        A.53.PHEGLN*A.55.ASPPRO
3k25A         A.130.PHE*A.117.SERHIS
3k25A           A.99.TRP*A.32.GLYGLY
3k25A              A.10.ARG*B.10.ARG
3k25A            A.164.HIS*A.254.GLU
3k25A           A.109.ASNALA*B.2.TYR
3k25A           A.108.ASPASN*B.2.TYR
3k25A         A.153.GLYASP*A.275.TYR
3k25A           A.49.ASPARG*A.48.PHE
3k25A         A.193.HISGLY*A.184.TYR
3k25A               A.14.TYR*B.6.PHE
3k25A         A.233.PHESER*A.281.TRP
3k25A         A.191.ASP*A.189.THRGLY
3k25A           A.2.TYR*B.108.ASPASN
3shpA             A.127.GLU*A.99.ARG
3shpA         A.149.ILEALA*A.155.ARG
3shpA              A.29.ASP*B.32.PHE
3shpA           A.35.ASN*A.37.ALAARG
3shpA              A.76.GLU*A.56.TRP
3shpA           A.57.HIS*A.55.ARGTRP
3shpA           A.36.ALAALA*A.85.ARG
3shpA             A.114.HIS*A.77.PHE
3shpA        A.36.ALAALA*A.83.SERLEU
3shpA           A.29.ASPSER*A.28.PHE
3shpA           A.99.ARG*A.95.ALAASP
3shpA             A.52.TRP*B.129.ARG
3shpA          A.31.ARG*B.151.ARGALA
3shpA         A.161.TYR*A.140.LYSALA
3kuuA         A.119.ILEPRO*B.133.ASN
3kuuA       A.30.PHEALA*A.131.ALAALA
3kuuA         A.133.ASN*B.119.ILEPRO
3kuuA          A.7.SERALA*A.9.TYRALA
3kuuA           A.44.VALGLU*A.43.HIS
3kuuA           A.39.ASN*C.40.VALPRO
3kuuA           A.40.VALPRO*C.39.ASN
3kuuA            A.145.HIS*B.145.HIS
3kuuA        A.76.GLYGLY*A.78.ALAALA
3kuuA           A.78.ALAALA*A.80.HIS
4q1qA            A.261.TYR*A.243.TYR
4q1qA         A.218.ASN*A.216.VALLEU
4q1qA              A.72.HIS*A.91.TYR
4q1qA      A.123.ASNSER*A.144.GLYGLY
4q1qA         A.259.ARG*A.257.GLYGLY
4q1qA         A.197.SERVAL*A.199.ASN
4q1qA            A.255.TYR*A.274.TYR
4q1qA             A.91.TYR*A.110.HIS
4q1qA            A.299.GLN*A.280.HIS
4q1qA            A.167.TYR*A.186.PHE
4q1qA      A.226.SERSER*A.246.GLYGLY
3melA           A.47.VALGLY*A.50.PHE
3melA         A.183.TYR*B.117.PHEGLU
3melA       A.132.ASPARG*A.15.TRPPRO
3melA            A.105.ARG*B.155.TYR
3melA              A.91.PHE*A.25.TYR
3melA         A.184.PROTHR*B.114.TRP
3melA         A.141.ALAPRO*A.201.PHE
3melA            A.155.TYR*B.105.ARG
3melA          A.127.GLN*A.93.GLNALA
3melA         A.114.TRP*B.184.PROTHR
3melA         A.117.PHEGLU*B.183.TYR
3melA            A.126.ARG*A.140.TYR
3melA         A.145.TYR*A.143.GLYSER
2edmA         A.153.TYR*A.154.PHESER
2edmA             A.182.GLU*A.64.ARG
2edmA           A.55.GLN*A.55.GLNARG
2edmA              A.67.ARG*A.69.TYR
2edmA           A.47.ASPGLN*A.46.TYR
2edmA          A.178.GLYALA*A.56.ARG
4i83A              A.49.GLN*A.50.PHE
4i83A              A.51.GLN*D.20.TYR
4i83A              A.42.ASN*D.42.ASN
4i83A         A.121.ARG*A.121.ARGGLY
4i83A           A.31.PHE*A.32.GLUPRO
4i83A          A.27.ARG*D.107.GLYASP
4i83A              A.20.TYR*D.51.GLN
4i83A           A.90.PHE*A.77.ALAILE
4i83A         A.110.LEUVAL*A.112.PHE
4i83A              A.53.HIS*A.54.PHE
4i83A           A.90.PHEPHE*A.89.PHE
4i83A          A.107.GLYASP*D.27.ARG
2bl8A            A.103.PHE*A.102.GLN
2bl8A              A.68.ARG*B.63.TYR
2bl8A           A.93.TYR*A.85.ARGTHR
2bl8A              A.94.ARG*B.53.ARG
2bl8A              A.93.TYR*C.32.GLN
2bl8A              A.56.ASN*B.56.ASN
2ymmA          A.125.ASNSER*A.66.PHE
2ymmA          A.24.LEUASP*A.103.TYR
2ymmA         A.199.PHE*A.206.THRPRO
2ymmA         A.143.PHE*A.110.LEUTHR
2ymmA         A.163.TYR*A.189.GLYALA
2ymmA         A.199.PHE*A.200.VALALA
2ymmA           A.42.VALLEU*A.33.PHE
2ymmA           A.38.GLYASP*A.34.GLU
2ymmA          A.80.ASN*B.204.HISASN
2ymmA          A.204.HISASN*B.80.ASN
2ymmA           A.64.ARGPRO*A.63.TYR
2ymmA        A.39.ASPALA*A.33.PHEGLU
2a9sA          A.149.ARG*A.33.THRGLY
2a9sA         A.136.HISGLU*A.135.HIS
2a9sA          A.149.ARG*B.42.THRGLU
2a9sA          A.145.ARG*B.44.ILEALA
2a9sA           A.64.ARG*A.60.ASNASP
2a9sA              A.83.GLN*A.77.PHE
2a9sA        A.80.VALSER*A.78.GLYALA
2a9sA          A.42.THRGLU*B.149.ARG
2a9sA          A.44.ILEALA*B.145.ARG
2a9sA           A.95.ARG*A.67.LEUGLY
2a9sA          A.123.HIS*A.81.SERARG
2a9sA         A.151.ALATHR*A.140.TYR
2a9sA           A.51.VALASP*B.58.TYR
2a19B         B.483.HIS*B.484.VALCYS
2a19B         B.282.PHE*B.280.GLNVAL
2a19B         B.530.SERGLU*B.534.ARG
2a19B         B.419.ASNILE*B.421.PHE
2a19B         B.323.TYR*B.312.LEUALA
2a19B            B.327.TRP*B.262.ARG
2a19B            B.508.ASP*B.511.GLU
2a19B         B.279.GLYGLN*B.280.GLN
2a19B         B.400.LYSGLY*B.317.HIS
2a19B         B.368.PHE*B.369.CYSASP
2a19B         B.324.ASNGLY*B.323.TYR
2a19B            B.262.ARG*C.262.ARG
2a19B          B.489.PHE*A.43.GLYMET
2a19B         B.433.PHEGLY*B.308.GLU
4otsA              A.56.GLN*A.57.TYR
4otsA              A.20.TYR*A.24.GLN
4otsA           A.38.TRP*A.36.SERLEU
4otsA         A.190.ASNVAL*A.189.TYR
4otsA         A.232.TYR*A.233.LEUASP
4otsA              A.38.TRP*A.52.ASN
4otsA       A.21.ASNSER*A.244.LEUASN
4otsA         A.150.TYR*A.163.SERHIS
4otsA        A.94.GLYGLY*A.87.ASNGLY
4otsA         A.165.TYR*A.166.PHEGLU
4otsA           A.90.TYR*A.86.ASNASN
4otsA           A.40.TYR*A.38.TRPVAL
4otsA              A.43.TYR*A.70.GLU
4otsA              A.75.GLN*A.72.ARG
4otsA         A.211.SERASN*A.210.PHE
4otsA         A.102.SERASN*A.101.HIS
4ns5A         A.266.ASNALA*A.164.PHE
4ns5A         A.159.GLYTHR*A.163.ARG
4ns5A            A.361.ARG*A.356.PHE
4ns5A            A.268.ARG*A.272.TRP
4ns5A         A.354.GLNARG*A.358.ARG
4ns5A            A.231.TYR*A.237.GLN
4ns5A            A.319.TRP*A.307.ASP
3f4mA           A.95.ARG*A.91.ARGGLN
3f4mA         A.147.PHE*A.123.CYSARG
3f4mA           A.73.LEUHIS*A.79.PHE
3f4mA         A.111.PHE*A.112.GLUALA
3f4mA          A.49.TYR*A.154.GLYLEU
3f4mA          A.44.ARGVAL*A.167.HIS
3f4mA            A.111.PHE*A.160.TYR
4ovxA         A.261.ASN*A.259.ALAGLY
4ovxA            A.181.PHE*A.140.TYR
4ovxA         A.300.ALATHR*A.256.PHE
4ovxA         A.160.SERGLY*A.167.GLN
4ovxA              A.53.TRP*A.56.HIS
4ovxA         A.186.ASPILE*A.215.ARG
4ovxA            A.221.ASP*A.224.ASN
4ovxA              A.69.PHE*A.52.GLN
1ucrA           A.22.PHE*A.20.SERLYS
3a03A         A.172.LEUGLU*A.204.TRP
3a03A      A.179.GLNLYS*A.181.TYRLEU
3a03A         A.209.ARG*A.205.PHEGLN
3a03A            A.176.PHE*A.208.ARG
3a03A            A.181.TYR*A.209.ARG
3rn5A            A.178.HIS*A.314.PHE
3rn5A         A.167.PHE*A.174.GLNGLU
3rn5A         A.150.GLNLYS*A.149.PHE
3rn5A         A.245.LYSALA*A.187.PHE
3rn5A         A.315.PHE*A.327.THRSER
3rn5A            A.215.HIS*A.213.TYR
1auoA          A.19.TRP*A.111.ALAGLY
1auoA      A.131.PROLEU*A.105.ALASER
1auoA         A.168.ASP*A.171.VALGLN
1auoA        A.73.METSER*A.76.ALAARG
1auoA          A.96.GLUALA*A.100.ARG
1auoA            A.192.TRP*A.177.ARG
1auoA         A.145.PHEGLY*A.182.HIS
1auoA              A.67.TRP*A.21.HIS
1auoA            A.167.TYR*A.166.GLN
1auoA         A.216.ARG*A.215.ALAARG
1auoA         A.133.GLYGLY*A.109.PHE
1auoA         A.192.TRP*A.193.GLNGLU
1auoA              A.30.PHE*A.19.TRP
1auoA           A.21.HIS*A.26.ASPARG
1auoA         A.125.PHEILE*A.155.GLN
1rzhM           M.74.PHE*M.92.PHESER
1rzhM             M.301.HIS*H.11.ASP
1rzhM            M.301.HIS*M.297.TRP
1rzhM           M.88.ASPLEU*M.92.PHE
1rzhM         M.145.HIS*L.195.LEUSER
1rzhM         M.136.ARG*M.135.LEUARG
1rzhM         M.208.PHE*M.275.LEUVAL
1rzhM          M.115.TRP*M.95.GLUPRO
1rzhM          M.87.ARG*L.280.ASNGLY
1rzhM            M.187.ASN*L.166.ASN
1rzhM           M.11.GLN*M.40.GLYTRP
1rzhM          M.86.LEUARG*L.272.TRP
1rzhM         M.224.LEUALA*L.116.HIS
1rzhM         M.228.ARG*L.113.ILEGLY
1rzhM             M.22.GLU*L.207.ARG
1rzhM             M.51.TYR*M.136.ARG
1rzhM       M.121.PHEMET*M.62.SERGLY
1rzhM            M.229.PHE*M.247.ARG
1rzhM          M.121.PHE*M.65.METTRP
1rzhM            M.294.TRP*M.199.ASN
1rzhM           M.80.TRP*M.75.TRPTYR
1rzhM         M.184.ASP*M.180.PHESER
1rzhM                M.9.GLN*M.3.TYR
1rzhM            M.189.PHE*M.193.HIS
1rzhM      M.216.PHEALA*L.233.GLYLEU
1rzhM             M.46.GLN*L.217.ARG
1rzhM           M.6.ILEPHE*L.231.ARG
1rzhM              M.85.PHE*M.75.TRP
1rzhM           M.51.TYR*M.28.ASNARG
1rzhM          M.13.ARGGLY*H.140.PHE
1rzhM              M.246.GLU*L.5.PHE
1k8kE          E.54.PHEPHE*A.287.PHE
1k8kE          E.28.PHE*E.138.GLNGLU
1k8kE          E.149.PHE*E.87.SERLYS
1k8kE          E.50.LYSALA*A.242.PHE
1k8kE         E.137.ARG*E.133.LEUGLN
1k8kE         E.149.PHE*E.155.LYSPRO
1k8kE         E.105.ILEPRO*E.111.PHE
1k8kE              E.18.ASN*E.66.ARG
1k8kE            E.4.TYRHIS*E.48.TYR
1k8kE               E.5.HIS*E.58.TYR
3msqA           A.38.PHE*A.15.ALATYR
3msqA        A.79.LEUALA*A.88.GLYHIS
3msqA      A.150.ALAGLN*A.190.GLYSER
3msqA           A.70.LEUPRO*A.69.TRP
3msqA      A.146.ALAPHE*A.186.GLYTYR
3msqA         A.134.PHE*A.143.GLYLEU
3msqA            A.125.HIS*A.121.TRP
3msqA         A.122.ARGSER*A.105.TYR
3msqA         A.124.THRHIS*A.128.TYR
3msqA             A.68.ARG*C.172.GLN
3msqA          A.68.ARG*A.112.ASPASP
3msqA            A.134.PHE*A.185.ARG
1orfA           A.94.TYR*A.95.ASPPRO
1orfA           A.29.TYR*A.27.ARGPRO
1orfA         A.146.ASN*A.219.ASNCYS
1orfA         A.143.ARG*A.148.SERALA
1orfA          A.156.ARG*A.20.ASNGLU
1orfA           A.57.HISCYS*A.59.ASN
1orfA       A.43.ALAGLY*A.196.GLYSER
1orfA       A.103.LEULYS*A.55.ALAALA
1orfA         A.136.CYSGLN*A.137.GLN
1orfA           A.94.TYR*A.56.ALAHIS
2f1kA      A.214.ASPTHR*B.214.ASPTHR
2f1kA         A.265.ARG*A.261.PROGLU
2f1kA        A.121.GLYILE*A.9.GLYLEU
2f1kA         A.213.ARG*D.159.GLYVAL
2f1kA         A.247.HIS*B.190.GLNALA
2f1kA         A.179.HIS*A.174.VALALA
2f1kA         A.190.GLNALA*B.247.HIS
2f1kA            A.142.TYR*A.141.GLU
2f1kA            A.277.TYR*B.212.PHE
2f1kA         A.230.ALATHR*B.260.TRP
2f1kA           A.45.VALASP*A.20.ARG
2f1kA         A.176.TRP*B.191.ALACYS
2f1kA         A.120.GLN*A.120.GLNGLY
2f1kA         A.217.ARG*A.213.ARGASP
2f1kA           A.80.HIS*A.52.LEUSER
2f1kA         A.135.TYR*A.112.HISPRO
2f1kA         A.260.TRP*B.230.ALATHR
2f1kA           A.99.GLU*A.99.GLUPRO
2f1kA         A.109.ILEGLY*A.108.PHE
2f1kA         A.223.PROGLU*B.264.HIS
2f1kA            A.212.PHE*B.277.TYR
2f1kA         A.191.ALACYS*B.176.TRP
2f1kA         A.260.TRP*A.258.GLNGLN
2f1kA              A.46.ASP*A.25.TYR
2du7A         A.543.ASN*A.541.PHELEU
2du7A          A.76.GLUGLU*A.221.PHE
2du7A            A.204.PHE*A.313.TYR
2du7A         A.310.PHE*A.258.GLYLYS
2du7A      A.349.ALAMET*A.352.TYRPRO
2du7A             A.92.GLN*A.204.PHE
2du7A         A.398.GLU*A.397.LYSGLU
2du7A      A.482.GLYILE*A.515.ILEASN
2du7A          A.80.ASN*A.202.GLYTRP
2du7A            A.479.TYR*A.438.ASN
2du7A             A.70.TYR*A.221.PHE
2du7A            A.411.PHE*A.412.ASN
2du7A         A.203.TRP*A.199.METTHR
2du7A            A.304.TRP*A.297.TYR
2du7A             A.381.TYR*A.41.HIS
2du7A         A.446.ASNILE*A.448.TYR
2du7A            A.241.TYR*A.228.ARG
2du7A         A.274.PHE*A.272.THRLYS
2du7A      A.157.LEUVAL*A.159.PHEGLU
2du7A         A.311.GLYVAL*A.286.TYR
3iabA           A.89.GLN*B.69.GLYLYS
3iabA            A.111.GLN*A.158.GLN
3iabA           A.85.GLYPRO*B.73.GLU
3iabA           A.47.HISGLY*A.82.PHE
3iabA             A.132.ARG*B.85.GLN
3iabA         A.113.ASNLYS*A.155.PHE
3iabA      A.147.ILEILE*A.145.SERGLU
3iabA           A.96.GLU*B.95.LYSTHR
2o6wA           A.38.GLU*A.38.GLUCYS
2jdiI           I.23.ARG*I.19.ALALYS
1r12A         A.239.CYSSER*B.236.PHE
1r12A          A.47.PHE*A.118.PROGLY
1r12A              A.41.PHE*A.11.PHE
1r12A          A.66.GLN*A.146.SERTYR
1r12A         A.223.PHE*A.221.LYSHIS
1r12A          A.62.PHE*A.142.METALA
1r12A      A.169.TYRARG*A.167.PROALA
1r12A      A.250.LEUALA*B.250.LEUALA
1r12A              A.14.ARG*B.22.ARG
1r12A         A.226.ASPCYS*A.225.PHE
1r12A         A.246.ARG*A.246.ARGGLU
1r12A         A.169.TYR*A.170.ARGPRO
1r12A         A.120.PHEASN*A.114.GLN
1r12A              A.22.ARG*B.14.ARG
1r12A            A.157.TYR*A.175.PHE
1r12A         A.134.GLN*A.132.PROVAL
1r12A       A.48.LYSASN*A.114.GLNARG
1r12A              A.81.TYR*A.85.HIS
1r12A         A.136.ARG*A.132.PROVAL
1r12A         A.157.TYR*A.158.METVAL
3tlkA           A.78.ARGVAL*A.87.ARG
3tlkA         A.199.TYR*A.200.THRALA
3tlkA            A.301.ARG*A.300.PHE
3tlkA              A.31.ARG*A.29.TRP
3tlkA           A.83.GLNGLY*A.85.PHE
3tlkA           A.43.GLU*A.43.GLUSER
3tlkA            A.304.TYR*A.172.ARG
3tlkA           A.44.SERGLN*A.29.TRP
3tlkA         A.102.TYR*A.105.GLUPRO
3tlkA            A.237.GLN*A.243.HIS
3tlkA      A.301.ARGLEU*A.299.THRPHE
3tlkA         A.152.TRP*A.303.ASPTYR
3tlkA             A.87.ARG*B.105.GLU
3tlkA            A.152.TRP*A.153.GLN
3tlkA            A.215.GLN*A.209.TRP
3tlkA          A.303.ASP*A.58.GLYSER
3tlkA         A.293.TYR*A.291.GLNVAL
1h32A             A.28.PHE*A.196.GLN
1h32A              A.43.GLN*A.35.TRP
1h32A            A.166.TYR*A.248.ARG
1h32A              A.32.ARG*A.37.PHE
1h32A          A.53.SERGLY*A.205.TYR
1h32A            A.193.HIS*A.188.TYR
1h32A           A.38.ARG*A.37.PHEARG
1h32A            A.231.PHE*B.103.ARG
1h32A         A.205.TYR*A.206.ARGLEU
1h32A          A.97.TYR*A.102.GLYLYS
1h32A           A.98.VALGLU*A.97.TYR
1h32A            A.218.ARG*A.206.ARG
1h32A            A.124.TRP*A.115.ARG
1h32A         A.166.TYR*A.177.CYSALA
1h32A           A.76.CYSALA*A.65.TRP
1h32A          A.260.ARG*A.34.GLYTRP
1h32A         A.124.TRP*A.130.ASPMET
1h32A            A.213.ASN*A.211.ARG
1h32A         A.210.ALAARG*A.205.TYR
2vpaA           A.67.ASP*A.65.GLNGLY
2vpaA              A.43.TRP*A.79.ARG
2vpaA           A.62.ARGPRO*A.61.TYR
2vpaA            A.112.ARG*A.176.TRP
2vpaA              A.86.HIS*A.79.ARG
2vpaA           A.67.ASP*A.68.LEUVAL
2vpaA           A.22.GLNSER*A.17.ARG
2vpaA              A.65.GLN*A.62.ARG
2vpaA            A.110.GLN*A.176.TRP
2vpaA             A.22.GLN*A.174.GLU
2vpaA           A.92.VALSER*A.91.GLU
2vpaA              A.43.TRP*A.53.PHE
2vpaA          A.120.ALAARG*A.86.HIS
2vpaA           A.43.TRP*A.76.GLYARG
4a0dA         A.803.ARGSER*A.801.TRP
4a0dA         A.521.TYR*A.533.GLYSER
4a0dA         A.720.VALTHR*A.719.HIS
4a0dA         A.637.ALAPHE*A.661.PHE
4a0dA         A.860.GLU*A.858.SERSER
4a0dA         A.751.GLYLEU*A.756.GLU
4a0dA         A.640.CYSTHR*A.660.ASN
4a0dA         A.867.THRGLY*A.899.TYR
4a0dA            A.805.HIS*A.788.GLN
4a0dA            A.705.PHE*A.846.ASN
4a0dA         A.805.HIS*A.806.GLUASP
4a0dA            A.829.PHE*A.835.GLN
4a0dA         A.868.GLYASN*A.899.TYR
4a0dA         A.762.ASN*A.787.GLUGLN
4a0dA            A.653.TYR*A.652.GLU
4a0dA         A.503.LYSASP*A.502.TYR
4a0dA            A.564.TYR*A.568.TRP
4a0dA         A.506.TRP*A.518.GLNASN
4a0dA         A.661.PHEASN*A.665.PHE
4a0dA      A.740.ASNARG*A.742.PHEVAL
4a0dA            A.789.TYR*A.787.GLU
4a0dA            A.536.TRP*A.540.GLN
4a0dA         A.549.ARGPRO*A.577.TRP
4a0dA         A.725.THRILE*A.900.PHE
4a0dA         A.738.PHE*A.869.ASNTRP
4a0dA         A.490.ARG*A.488.LEULEU
4a0dA         A.738.PHEALA*A.737.ASP
4a0dA            A.738.PHE*A.754.GLN
4a0dA            A.568.TRP*A.662.ASN
4a0dA         A.802.SERARG*A.801.TRP
4a0dA         A.479.ASNHIS*A.621.HIS
4a0dA         A.707.GLUTRP*A.709.GLU
4a0dA         A.505.LEUTRP*A.504.ASP
4a0dA         A.677.LYSTHR*A.801.TRP
4a0dA         A.854.ARG*A.852.PHELEU
4a0dA         A.744.GLYGLY*A.755.GLU
4a0dA            A.685.ARG*A.806.GLU
4a0dA            A.828.HIS*A.875.PHE
3kolA        A.85.PROPRO*A.87.ASPPRO
3kolA        A.17.LEUARG*A.15.GLYASN
3kolA           A.28.GLN*A.28.GLNASP
3kolA         A.149.ARG*A.150.CYSASP
3kolA         A.138.PHE*A.146.ILEGLU
3kolA              A.45.GLU*A.67.PHE
4me7E            E.14.LEUPRO*F.7.ARG
4me7E              E.28.ARG*F.52.HIS
4me7E           E.79.GLUCYS*A.80.ARG
4me7E              E.52.HIS*F.28.ARG
3hwpA          A.230.TRP*A.62.THRPRO
3hwpA           A.12.PHESER*A.11.TYR
3hwpA            A.120.ARG*A.113.TRP
3hwpA             A.127.TYR*A.20.PHE
3hwpA             A.96.ARG*A.224.TYR
3hwpA         A.193.GLYSER*A.216.PHE
3hwpA            A.136.HIS*A.139.ARG
3hwpA         A.152.TYR*A.174.GLNGLN
3hwpA           A.17.GLN*B.51.GLNGLN
3hwpA           A.98.PHE*A.99.PHEPRO
3hwpA           A.77.VALSER*A.76.PHE
3hwpA         A.152.TYR*A.173.PHEGLN
3hwpA           A.92.TYR*A.93.VALGLN
3hwpA             A.127.TYR*A.12.PHE
3hwpA            A.165.ARG*A.255.PHE
3hwpA            A.121.TYR*A.132.ASN
3hwpA            A.109.TRP*A.113.TRP
3hwpA           A.36.PHE*A.23.ASNGLN
3hwpA            A.114.HIS*A.110.TRP
3hwpA            A.121.TYR*A.129.HIS
3hwpA         A.137.HISGLN*A.141.ARG
3hwpA            A.124.TRP*A.274.GLU
3hwpA           A.83.TYR*A.53.GLYPRO
3hwpA              A.11.TYR*B.11.TYR
3hwpA         A.230.TRP*A.228.ARGTYR
3hwpA         A.283.PROASP*A.287.ARG
4pprA            A.114.HIS*A.228.TYR
4pprA        A.94.ALAGLU*A.96.ALATRP
4pprA         A.319.TRP*A.270.GLNLEU
4pprA         A.294.VALGLY*A.293.PHE
4pprA      A.143.GLYTHR*A.158.ASNTHR
4pprA        A.67.THRPRO*A.65.PROPRO
4pprA            A.252.PHE*A.170.HIS
4pprA         A.318.PROTRP*A.293.PHE
4pprA      A.313.ARGGLN*A.316.ILEPRO
4pprA            A.275.TYR*A.299.ARG
4pprA         A.253.ASPPHE*A.252.PHE
4pprA          A.110.ALAARG*A.97.TRP
4pprA         A.269.ASN*A.280.GLYGLY
4pprA         A.285.TYR*A.286.THRASP
4pprA         A.161.GLYTHR*A.163.TYR
4pprA            A.260.HIS*A.257.HIS
2xirA       A.1144.HIS*A.1149.GLNARG
2xirA       A.1072.METALA*A.1089.TRP
2xirA         A.934.GLUPHE*A.999.PHE
2xirA         A.831.ARG*A.910.GLYPRO
2xirA            A.918.PHE*A.850.GLU
2xirA         A.936.VALPRO*A.935.PHE
2xirA         A.822.TYR*A.823.ASPALA
2xirA         A.918.PHE*A.919.CYSLYS
2xirA            A.845.PHE*A.878.GLU
2xirA     A.1050.ALAARG*A.842.ARGGLY
2xirA       A.1153.PHE*A.1016.METGLU
2dd7A           A.11.HISGLY*A.19.PHE
2dd7A          A.11.HIS*A.112.VALGLU
2dd7A             A.192.ARG*A.59.TYR
2dd7A               A.9.ARG*A.11.HIS
2dd7A         A.103.TYR*A.101.TYRTHR
2dd7A           A.61.PHE*A.27.GLYGLU
2dd7A          A.99.PHEARG*A.101.TYR
2dd7A          A.61.PHEALA*A.209.GLN
2dd7A         A.189.PHETHR*A.212.PHE
2dd7A         A.191.HIS*A.192.ARGARG
2dd7A             A.154.ARG*A.52.HIS
2dd7A         A.176.ASNPRO*A.146.ASN
2dd7A          A.93.GLYILE*A.119.PHE
2dd7A           A.12.GLYASN*A.19.PHE
2dd7A           A.64.PHE*A.69.LYSASN
2dd7A            A.193.ARG*A.208.TYR
1rwhA            A.489.HIS*A.501.ARG
1rwhA            A.719.TRP*A.757.ARG
1rwhA            A.570.PHE*A.533.ARG
1rwhA         A.405.TRP*A.469.VALPRO
1rwhA         A.582.HISVAL*A.612.TYR
1rwhA      A.644.ASNLYS*A.646.TYRSER
1rwhA            A.612.TYR*A.446.ARG
1rwhA             A.144.HIS*A.13.ARG
1rwhA         A.389.GLYPRO*A.392.TRP
1rwhA         A.304.THRGLY*A.294.ARG
1rwhA         A.705.GLN*A.747.SERGLY
1rwhA         A.355.ARG*A.310.ALASER
1rwhA         A.415.ARGGLY*A.417.TYR
1rwhA            A.705.GLN*A.402.ARG
1rwhA              A.24.ASN*A.18.ASP
1rwhA           A.81.GLN*A.81.GLNLEU
1rwhA            A.118.ARG*A.116.ASN
1rwhA            A.301.GLU*A.592.TRP
1rwhA         A.300.ARGGLU*A.592.TRP
1rwhA            A.125.TRP*A.169.GLN
1rwhA           A.94.PHE*A.88.THRPRO
1rwhA         A.231.ILEGLN*A.230.PHE
1rwhA            A.474.TRP*A.671.TRP
1rwhA            A.162.PHE*A.115.TYR
1rwhA            A.170.PHE*A.174.ARG
1rwhA         A.566.HIS*A.571.GLYGLY
1rwhA         A.344.TYR*A.431.LEUGLY
1rwhA         A.406.TYR*A.407.GLUCYS
1rwhA           A.199.GLUASP*A.9.PHE
1rwhA         A.161.HIS*A.117.ASPARG
1rwhA         A.670.PHE*A.680.GLYALA
1rwhA         A.332.ARG*A.320.ALAARG
1rwhA         A.114.CYSTYR*A.116.ASN
1rwhA         A.388.ARGGLY*A.392.TRP
1rwhA         A.215.TRP*A.211.LEUSER
1rwhA         A.338.TRP*A.334.LEUCYS
1rwhA            A.345.ARG*A.344.TYR
1rwhA            A.9.PHEALA*A.13.ARG
1rwhA         A.152.ARG*A.148.SERALA
1rwhA         A.564.TRP*A.544.THRALA
1rwhA            A.612.TYR*A.527.GLU
1rwhA            A.167.TRP*A.184.ARG
1rwhA         A.567.LEUGLU*A.566.HIS
1rwhA            A.152.ARG*A.144.HIS
1rwhA         A.702.GLU*A.702.GLUPRO
1rwhA         A.503.SERTRP*A.505.PHE
1rwhA         A.376.HIS*A.483.VALALA
1rwhA         A.514.LEUGLY*A.624.TYR
1rwhA         A.385.THRMET*A.387.HIS
1rwhA         A.563.ARG*A.577.ASPASP
1rwhA            A.167.TRP*A.206.HIS
1rwhA            A.532.HIS*A.608.PHE
1rwhA            A.533.ARG*A.433.GLN
1rwhA         A.592.TRP*A.439.TRPALA
1rwhA         A.416.GLYTYR*A.406.TYR
1rwhA         A.472.ASP*A.473.GLUTRP
1rwhA         A.341.ARG*A.337.GLYTRP
4u1fA            A.619.PHE*B.163.PHE
4u1fA         A.274.CYSILE*A.276.TRP
4u1fA            A.462.PHE*A.485.TYR
4u1fA         A.586.TRP*A.573.ASNILE
4u1fA         A.210.HIS*A.209.TYRHIS
4u1fA         A.153.TRP*A.203.GLYTHR
4u1fA         A.576.TRP*A.515.TRPSER
4u1fA         A.455.TRPGLU*A.515.TRP
4u1fA            A.565.HIS*A.538.GLN
4u1fA            A.235.ASN*A.297.TRP
4u1fA      A.478.PROALA*A.507.LYSTHR
4u1fA            A.586.TRP*A.573.ASN
4u1fA         A.228.PHETYR*A.276.TRP
4u1fA         A.285.ALATHR*A.287.PHE
4u1fA            A.192.TRP*A.189.ARG
4u1fA            A.342.PHE*A.301.ARG
4u1fA         A.248.PHE*A.249.SERTHR
4u1fA            A.311.ARG*A.287.PHE
4u1fA         A.543.ASPTYR*A.541.ASP
4u1fA            A.163.PHE*B.619.PHE
4u1fA         A.604.ALAGLY*A.606.ASN
4u1fA         A.287.PHEPRO*A.271.HIS
4u1fA            A.410.PHE*A.455.TRP
4u1fA         A.211.GLN*A.211.GLNGLN
4u1fA      A.300.VALARG*A.298.PROLEU
4u1fA         A.354.PHE*A.355.ARGASN
4u1fA            A.462.PHE*A.453.PHE
4u1fA            A.294.TYR*A.340.ARG
4u1fA         A.621.TRP*B.576.TRPASP
4u1fA            A.302.TRP*A.244.TYR
4u1fA            A.622.ARG*B.153.TRP
4u1fA            A.453.PHE*A.403.HIS
4u1fA            A.156.ASP*A.175.TRP
4u1fA      A.212.GLNGLY*A.230.HISPRO
4u1fA            A.499.TRP*A.433.ARG
4u1fA            A.475.TYR*A.531.ASN
4u1fA         A.418.HIS*A.396.GLNVAL
4u1fA         A.576.TRPASP*B.621.TRP
4u1fA         A.344.PHE*A.302.TRPSER
4u1fA         A.347.GLUGLY*A.304.TYR
4u1fA            A.551.ASN*A.549.ASN
4u1fA            A.305.ASN*A.304.TYR
4u1fA      A.559.SERLEU*A.542.METASP
4u1fA         A.598.TYR*A.610.GLUASP
4u1fA         A.344.PHEALA*A.404.TRP
4u1fA            A.153.TRP*B.622.ARG
4u1fA            A.160.ARG*A.175.TRP
4u1fA         A.426.PHE*A.417.ARGHIS
2gtiA             A.155.ASP*A.66.HIS
2gtiA          A.171.PHE*A.66.HISPRO
2gtiA           A.43.PHE*A.54.ALAVAL
2gtiA         A.176.ARG*A.180.ASPASP
2gtiA         A.127.ALAPHE*A.117.PHE
2gtiA         A.136.TYR*A.137.ILEASN
2gtiA            A.268.PHE*A.310.ASP
2gtiA              A.61.ARG*A.58.PHE
2gtiA      A.270.GLNLYS*A.272.ILEILE
2gtiA            A.191.GLU*A.354.ASP
2gtiA           A.44.LYSASN*A.43.PHE
2gtiA            A.7.TYR*A.20.GLYGLU
2gtiA             A.64.ARG*A.118.ASP
2gtiA         A.102.CYSLYS*A.106.ASP
2gtiA               A.8.ASN*A.15.PHE
2gtiA         A.275.GLYLEU*A.277.HIS
2gtiA           A.91.ASPSER*A.86.TRP
2gtiA             A.73.ARG*A.299.TYR
2gtiA            A.265.TYR*A.241.PHE
2gtiA           A.74.ASNLEU*A.76.ASN
2gtiA            A.268.PHE*A.285.ARG
2gtiA           A.92.SERVAL*A.86.TRP
2gtiA          A.157.ASNGLY*A.88.TYR
2gtiA           A.87.ASPTYR*A.86.TRP
2gtiA         A.132.ARG*A.111.GLUSER
2gtiA         A.150.GLYPRO*A.222.PHE
2gtiA         A.349.ASN*A.353.LYSASP
2gtiA          A.123.GLYALA*A.81.TRP
2gtiA         A.232.THRPRO*A.231.PHE
2gtiA            A.226.ARG*A.231.PHE
2gtiA         A.269.ASNGLN*A.270.GLN
2gtiA      A.301.SERSER*A.303.ILEHIS
2gtiA         A.262.HIS*A.274.GLYGLY
4g1tA         A.161.PHE*A.177.GLYLEU
4g1tA            A.100.TYR*A.116.TYR
4g1tA           A.55.ASNLEU*A.19.HIS
4g1tA           A.59.TYR*A.19.HISPHE
4g1tA          A.20.PHE*A.102.TRPVAL
4g1tA      A.381.GLNLEU*A.387.CYSGLU
4g1tA           A.22.TRP*A.18.CYSHIS
4g1tA         A.150.GLYGLY*A.154.ASN
4g1tA            A.134.GLU*B.134.GLU
4g1tA         A.348.ASPGLN*A.350.TYR
4g1tA         A.341.ALASER*A.357.PHE
4g1tA         A.391.ALAILE*A.395.PHE
4g1tA            A.210.TYR*A.248.ASP
4g1tA        A.66.GLNASN*A.61.LYSHIS
4g1tA            A.104.TYR*A.112.ASP
4g1tA         A.291.TYR*A.318.HISALA
4g1tA             A.22.TRP*B.142.GLU
4g1tA      A.262.GLUPRO*A.257.TYRARG
4g1tA      A.322.HISLEU*A.284.HISCYS
4g1tA      A.153.GLNASN*A.146.ARGLEU
3bg2A          A.77.ARG*A.106.GLYALA
3bg2A         A.192.TYR*A.209.LYSTYR
3bg2A         A.194.LYSGLU*A.212.PHE
3bg2A           A.62.VALHIS*A.61.PHE
3bg2A      A.269.GLYLEU*A.271.ILEPRO
3bg2A         A.302.ARG*A.298.GLUTHR
3bg2A         A.238.VALSER*A.240.TRP
3bg2A           A.93.HIS*A.91.TYRPRO
3bg2A         A.158.PHE*A.159.GLUGLY
3bg2A         A.216.GLU*A.215.SERGLU
3bg2A       A.80.GLYARG*A.105.PHEGLY
3bg2A            A.151.GLU*A.413.TYR
3bg2A         A.326.GLU*A.326.GLUGLU
3bg2A      A.169.SERGLN*A.177.GLYGLY
3gnlA         A.134.TRP*A.132.ALAALA
3gnlA              A.28.ARG*A.51.PHE
3gnlA         A.166.ALAPRO*A.145.TRP
3gnlA           A.61.PROPHE*A.56.GLU
3gnlA         A.137.ARG*A.181.PHEGLY
3gnlA              A.66.GLN*A.62.PHE
3gnlA           A.38.TYR*A.36.HISALA
3gnlA         A.193.PHE*A.185.LEULEU
3gnlA            A.139.TRP*A.143.ASN
3gnlA           A.52.ALAILE*A.51.PHE
3gnlA         A.128.GLN*A.128.GLNPRO
3gnlA            A.134.TRP*A.135.GLN
1jixA         A.187.GLYGLY*A.186.TYR
1jixA            A.220.GLN*A.217.ARG
1jixA         A.159.TYR*A.160.PHEPRO
1jixA           A.82.SERALA*A.51.PHE
1jixA         A.194.GLNARG*A.258.ASP
1jixA         A.226.TYR*A.196.GLUSER
1jixA         A.163.GLUGLN*A.165.TYR
1jixA            A.269.ARG*A.186.TYR
1jixA            A.290.HIS*A.299.TYR
1jixA         A.161.PROILE*A.160.PHE
1jixA         A.234.PHE*A.217.ARGGLU
1jixA            A.335.ARG*A.172.PHE
1jixA         A.265.PHE*A.137.GLNGLY
1jixA           A.96.TYR*A.97.LEUPHE
1jixA            A.261.TYR*A.258.ASP
1jixA           A.41.SERLEU*A.51.PHE
1jixA         A.172.PHE*A.173.GLNLEU
1jixA            A.265.PHE*A.261.TYR
1jixA         A.122.THRGLU*A.109.TRP
1jixA         A.106.SERGLN*A.105.PHE
1jixA             A.32.GLU*A.170.ASN
1jixA        A.49.LYSSER*A.43.LYSASN
4l7xA              A.18.ARG*A.31.HIS
4l7xA           A.43.ARG*A.39.GLUALA
4l7xA           A.29.TRP*A.21.ILECYS
4l7xA           A.52.TYR*A.53.ILECYS
3g98A         A.758.LYSGLU*A.769.TYR
3g98A         A.854.PHE*A.770.GLYVAL
3g98A      A.818.ASPLYS*A.820.VALASN
3g98A         A.808.PHE*A.846.GLYGLY
4pltA             A.67.TYR*A.112.ASN
4pltA              A.34.PHE*A.67.TYR
4pltA         A.151.ALAGLY*A.155.ASP
4pltA            A.239.PHE*A.238.TYR
4pltA           A.94.SERARG*A.93.TRP
4pltA            A.121.PHE*A.252.TYR
4pltA          A.234.THRGLY*A.84.ARG
4pltA           A.34.PHE*A.35.ASPILE
4pltA       A.231.LEULEU*D.39.GLYMET
4pltA         A.158.ARG*A.224.ALAGLY
4pltA       A.39.GLYMET*D.231.LEULEU
4pltA         A.174.VALGLN*A.175.GLN
4pltA             A.238.TYR*A.14.ASN
4pltA            A.162.PHE*A.220.ARG
3mqhA              A.99.ARG*A.86.TYR
3mqhA              A.27.HIS*B.24.HIS
3mqhA            A.157.HIS*A.175.HIS
3mqhA              A.98.TYR*A.84.ASN
3mqhA               A.5.HIS*A.24.HIS
3mqhA              A.24.HIS*C.27.HIS
3mqhA              A.94.ARG*A.87.ASN
3mqhA      A.147.PROALA*A.145.GLYVAL
3mqhA           A.25.TRPVAL*B.25.TRP
3mqhA           A.45.PHE*A.46.VALGLY
3mqhA           A.25.TRP*C.25.TRPVAL
3zuzA            A.383.ARG*A.220.TYR
3zuzA         A.170.TYR*A.176.TYRASP
3zuzA         A.383.ARG*A.378.SERTYR
3zuzA            A.468.PHE*A.216.PHE
3zuzA         A.217.ASPPRO*A.216.PHE
3zuzA            A.235.ASP*A.232.ASN
3zuzA         A.282.GLN*A.278.GLNLYS
3zuzA      A.380.PROLEU*A.382.HISARG
3zuzA            A.414.HIS*A.427.ASP
3zuzA            A.420.HIS*A.423.TYR
3zuzA         A.337.PHE*A.192.GLULEU
3zuzA         A.433.ASPLEU*A.172.PHE
3zuzA            A.492.GLU*A.225.TYR
3zuzA         A.247.PHE*A.248.THRPRO
3zuzA         A.200.ASPALA*A.204.ARG
3zuzA         A.432.ASP*A.427.ASPLYS
3zuzA            A.392.TRP*A.307.PHE
3zuzA            A.194.ASP*A.207.GLU
3zuzA         A.317.GLU*A.243.GLULEU
3zuzA         A.312.GLU*A.312.GLUGLN
3zuzA         A.317.GLUGLY*A.247.PHE
3ne5B         B.302.ASNALA*B.242.ASP
3ne5B            B.121.TYR*C.224.ARG
3ne5B      B.120.GLNTYR*B.118.GLUTYR
3ne5B            B.127.ARG*C.131.PHE
3ne5B         B.149.PROLEU*B.136.TYR
3ne5B      B.330.GLNALA*B.379.SERSER
3ne5B       B.89.THRGLN*A.281.GLUGLY
3ne5B         B.119.TYR*C.137.PROLEU
3ne5B            B.297.ARG*B.245.TRP
3ne5B            B.263.GLN*B.279.ARG
3ne5B         B.397.ARG*A.583.ALAGLU
3ne5B            B.121.TYR*B.239.GLN
3ne5B         B.193.ALAASP*B.197.ARG
3ne5B            B.239.GLN*B.116.TYR
3ne5B      B.243.PROVAL*B.241.METASP
3ne5B         B.356.ALAVAL*B.368.ARG
3ne5B            B.245.TRP*B.117.ASN
3ne5B      B.289.ALAALA*B.291.THRARG
3ne5B         B.197.ARGLEU*B.205.GLN
2fvgA         A.129.PHEGLY*A.131.PHE
2fvgA      A.226.ASNPRO*A.224.GLYASP
2fvgA          A.194.VALGLN*A.62.ASP
2fvgA          A.146.TYR*A.14.GLYASP
2fvgA         A.136.GLUALA*A.131.PHE
1xpjA            A.103.ARG*A.106.GLU
1xpjA               A.7.ASP*D.98.ASP
1xpjA           A.91.GLYHIS*A.89.TRP
1xpjA              A.49.ARG*A.20.TYR
1xpjA           A.60.LYSILE*A.54.TYR
2fr2A           A.33.PHE*A.25.GLYLYS
2fr2A           A.66.SERGLU*A.65.HIS
2fr2A           A.97.TYR*A.77.GLYCYS
2fr2A          A.128.LEUASP*A.93.GLU
2fr2A           A.35.TYR*A.23.GLYALA
2fr2A         A.146.ARG*A.126.THRALA
2fr2A           A.52.THRGLN*A.51.TYR
2fr2A           A.70.TYR*A.69.GLYTYR
2nwaA           A.71.TYR*A.25.PHETHR
2nwaA           A.32.TYRARG*A.62.TRP
2nwaA           A.66.ARG*A.29.LYSASP
3q3wA              A.41.HIS*A.29.PHE
3q3wA           A.46.LEUARG*A.60.PHE
3q3wA         A.150.LYSARG*A.161.PHE
3q3wA           A.48.TYR*A.53.GLUSER
3q3wA           A.76.PHE*A.15.GLUTYR
3q3wA             A.7.HIS*A.8.LYSGLY
3q3wA        A.31.LEUALA*A.33.VALSER
3q3wA      A.138.SERGLN*A.140.ASPLYS
3q3wA               A.98.ARG*A.2.GLN
4mmoA         A.136.GLUGLU*A.134.GLU
4mmoA         A.191.TYRGLY*B.261.PHE
4mmoA           A.70.ASNHIS*A.69.TYR
4mmoA          A.73.ASP*A.135.GLYGLU
4mmoA         A.261.PHE*B.191.TYRGLY
4mmoA            A.224.ARG*A.231.TYR
4mmoA            A.372.GLN*A.172.ARG
4mmoA         A.167.LEUASP*A.174.GLN
4mmoA              A.98.TYR*A.85.ARG
4mmoA          A.72.TYR*A.134.GLUGLY
4mmoA         A.279.TYR*A.274.GLUALA
4mmoA         A.137.GLU*A.137.GLUGLU
4mmoA         A.193.THRLYS*A.302.HIS
4mmoA         A.287.PHE*A.288.GLUCYS
4mmoA            A.343.PHE*A.319.TYR
4mmoA           A.56.ALAGLU*A.55.TYR
4mmoA          A.49.LYSGLY*A.143.ASN
4kblA         A.301.ARG*A.277.PROALA
4kblA            A.379.TRP*A.359.HIS
4kblA         A.118.ARG*A.118.ARGGLU
4kblA         A.301.ARGGLN*A.296.ARG
4kblA         A.416.PHE*A.391.ARGTYR
4kblA         A.135.LEUSER*A.140.TRP
4kblA         A.355.GLYGLY*A.430.PHE
4kblA         A.541.GLN*A.541.GLNHIS
4kblA         A.514.SERGLN*A.515.GLN
4kblA            A.526.GLN*B.190.TYR
4kblA         A.479.ALAPHE*A.417.TYR
4kblA         A.138.PHE*A.144.LYSLEU
4kblA            A.420.ARG*A.416.PHE
4kblA            A.476.TYR*A.495.GLN
4kblA            A.382.HIS*A.379.TRP
4kblA         A.293.LYSPRO*A.311.TRP
4kblA         A.534.SERARG*A.535.ARG
3s88I         I.176.PHE*I.109.TYRASN
3s88I            I.104.TRP*J.516.HIS
3s88I         I.123.PROPRO*I.172.ARG
3s88I         I.102.GLYGLU*J.518.TRP
3s88I           I.53.CYSLYS*I.55.ASP
3s88I      I.107.ASNCYS*I.105.ALAGLU
3s88I         I.220.TYR*I.219.GLUTYR
3s88I           I.82.ALATHR*I.86.TRP
3s88I           I.78.ASP*I.76.SERTHR
3s88I            I.120.GLU*I.172.ARG
3s88I         I.174.VALASN*I.110.ASN
3trtA         A.316.SERTHR*A.320.ARG
3trtA         A.291.TYR*B.291.TYRLYS
3trtA         A.319.TYR*B.319.TYRARG
2dpyA         A.411.ALALYS*A.410.TYR
2dpyA            A.334.ASP*A.331.GLU
2dpyA              A.93.ARG*A.28.TYR
2dpyA         A.109.GLN*A.140.GLYALA
2dpyA              A.95.TYR*A.26.ARG
2dpyA            A.211.GLU*A.272.ASP
2dpyA            A.266.HIS*A.174.ARG
4otmA       A.1544.VALPRO*A.1543.TYR
4otmA          A.1562.TYR*A.1543.TYR
4otmA       A.1646.CYSHIS*A.1645.TYR
4otmA          A.1591.GLU*A.1589.ARG
4otmA          A.1640.ARG*A.1641.TRP
4otmA          A.1623.PHE*B.1546.ASN
4otmA          A.1564.ASP*A.1560.TRP
4otmA       A.1565.ALAALA*B.1645.TYR
4otmA       A.1609.ARG*A.1609.ARGLYS
4otmA          A.1546.ASN*B.1623.PHE
4otmA       A.1578.SERASN*B.1539.GLN
4otmA       A.1645.TYR*B.1565.ALAALA
4otmA       A.1639.ASN*A.1637.LYSGLY
2esnA            A.151.PHE*A.292.HIS
2esnA              A.67.ARG*D.89.TRP
2esnA           A.39.PHE*A.28.ALAALA
2esnA            A.32.LEUALA*D.6.ARG
2esnA         A.168.ALAHIS*A.279.ARG
2esnA      A.147.GLYARG*A.149.ILEASP
2esnA             A.99.ARG*A.101.PHE
2esnA         A.176.TYR*A.250.ALAPRO
2esnA         A.174.ASPARG*A.276.TYR
2esnA         A.216.ARG*A.212.GLYVAL
2esnA            A.123.HIS*A.122.GLN
2esnA         A.171.TRP*A.278.LEUARG
2esnA              A.23.ARG*A.20.TYR
2esnA           A.21.ARG*A.17.ASPALA
2esnA         A.172.PHE*A.173.ALAASP
2esnA          A.224.ARG*C.29.ALASER
2esnA         A.267.TYR*A.265.ALALEU
2esnA            A.158.GLU*A.220.ARG
2esnA         A.137.ARGLYS*A.207.TRP
2esnA           A.22.HIS*A.27.THRALA
2esnA              A.89.TRP*D.67.ARG
2esnA      A.297.GLYGLN*A.299.LEULYS
2esnA            A.134.ASN*C.134.ASN
3vldA         A.213.LYSASP*A.212.PHE
3vldA         A.348.HISVAL*A.347.PHE
3vldA         A.121.GLU*A.158.LYSALA
3vldA            A.259.HIS*A.258.ARG
3vldA         A.328.GLULEU*A.359.ASN
3vldA      A.125.PROLYS*A.123.SERGLN
3vldA            A.172.ARG*A.176.ASN
3vldA          A.122.ASNSER*A.89.PHE
3vldA         A.255.TRP*A.208.SERGLY
3vldA         A.272.GLU*A.272.GLUASP
3vldA         A.292.PHE*A.288.LEULEU
3vldA         A.189.GLU*A.189.GLUTHR
3vldA         A.253.LYSTYR*A.255.TRP
3vldA         A.392.GLU*A.392.GLUTHR
3vldA         A.252.ASPLYS*A.254.TYR
3vldA            A.281.ARG*A.271.PHE
3vldA         A.164.SERTHR*A.206.PHE
3vldA      A.228.VALGLU*A.230.ASPILE
3vldA         A.300.GLU*A.303.TYRSER
3vldA            A.217.PHE*A.212.PHE
3vldA              A.72.ASN*A.75.TYR
3okxA              A.31.HIS*A.52.ARG
3okxA           A.26.PHE*B.21.ASPALA
3okxA            A.103.ARG*B.146.ARG
3okxA           A.27.ILEGLY*A.56.PHE
3okxA          A.112.GLYTHR*A.76.TYR
3okxA           A.21.ASPALA*B.26.PHE
3okxA          A.110.PROILE*A.77.TRP
3okxA      A.109.ASNPRO*A.107.ARGPRO
3ldqB         B.205.ARG*B.201.CYSLYS
3ldqB            B.155.GLU*B.230.PHE
3ldqB         B.214.PHE*B.247.PHELEU
3ldqB         B.227.PROGLU*B.229.ASN
4k89A             A.87.TYR*A.146.PHE
4k89A             A.90.TRP*A.245.ARG
4k89A              A.29.ARG*A.55.ARG
4k89A            A.265.TYR*A.158.GLN
4k89A            A.7.GLYGLY*A.15.TYR
4k89A         A.141.GLUVAL*A.115.TRP
4k89A         A.115.TRP*A.118.THRALA
4k89A         A.115.TRP*A.117.GLYTHR
4k89A           A.54.PHE*A.55.ARGPHE
4k89A         A.259.TRP*A.254.ALAASN
4k89A              A.17.TYR*A.78.PHE
4k89A         A.217.TYRASN*A.216.TYR
4k89A            A.199.TYR*A.205.ARG
4k89A              A.9.ASN*A.130.TYR
4k89A          A.85.LYSLEU*A.177.TYR
4k89A              A.36.ASN*A.84.PHE
4k89A         A.293.VALGLY*A.212.ASN
4k89A         A.248.PHE*A.169.METALA
2i7fA           A.23.GLN*A.23.GLNGLU
2i7fA           A.36.GLYGLU*A.37.GLU
4ub6E             E.5.THRGLY*E.7.GLU
4ub6E            E.8.ARG*E.12.ASPILE
4ub6E           E.35.TRP*F.38.ALAALA
4ub6E           E.33.ALAGLY*F.32.PHE
4ub6E        E.34.GLYTRP*F.35.GLYALA
4ub6E              E.10.PHE*F.19.ARG
4ub6E              E.23.HIS*E.19.TYR
4ub6E           E.79.PHE*E.64.PROLEU
4ub6E           E.58.GLNGLU*E.59.GLU
3fm3A        A.93.ASNGLY*A.87.LEULYS
3fm3A         A.136.ASPGLY*A.215.PHE
3fm3A            A.218.HIS*A.210.HIS
3fm3A           A.52.ALAGLU*A.56.ARG
3fm3A            A.138.ARG*A.214.GLN
3fm3A            A.337.GLN*A.245.PHE
3fm3A         A.344.LEUSER*A.343.TYR
3fm3A             A.91.ARG*A.215.PHE
3fm3A             A.300.TYR*A.84.ARG
3fm3A         A.193.GLU*A.193.GLUILE
3fm3A          A.67.ARGPRO*A.148.PHE
3fm3A            A.117.GLN*B.199.TRP
3fm3A             A.131.PHE*A.55.HIS
3fm3A         A.339.GLU*A.141.ASPSER
3fm3A         A.110.TYR*A.111.THRVAL
3fm3A             A.358.TYR*A.59.ARG
3fm3A           A.16.PHE*A.17.LEUPRO
3fm3A          A.47.ASP*A.135.SERASP
3fm3A         A.157.VALALA*A.190.TYR
3fm3A         A.261.HIS*A.109.HISTYR
3fm3A      A.226.VALASN*A.180.GLYARG
3fm3A            A.339.GLU*A.243.GLU
3fm3A            A.199.TRP*B.117.GLN
3fm3A         A.257.PROPRO*B.256.ARG
3fm3A          A.97.PHE*A.131.PHEGLY
3fm3A         A.208.HIS*A.206.ASPLEU
3fm3A         A.262.PHEVAL*A.293.PHE
3fm3A         A.256.ARG*B.257.PROPRO
4mllA         A.157.THRGLU*A.160.TRP
4mllA         A.231.GLYPHE*A.243.PHE
4mllA           A.53.GLN*A.53.GLNPHE
4mllA         A.230.GLUGLY*A.243.PHE
4mllA         A.199.TYR*A.201.GLNASP
4mllA            A.250.ASN*B.196.GLU
4mllA           A.25.ALASER*A.54.PHE
4mllA         A.136.LEULYS*A.144.GLN
4mllA           A.66.ASP*A.64.ALAPRO
4mllA         A.199.TYR*A.200.LEUGLN
4mllA           A.38.PHE*A.39.LEULEU
4mllA            A.114.PHE*A.113.GLN
4mllA         A.222.ARGTHR*B.199.TYR
4mllA             A.48.ASN*A.177.ARG
4mllA           A.94.LYSTHR*A.92.TRP
4mllA            A.270.ASN*A.204.ASP
4mllA          A.92.TRP*A.103.ASNSER
1q1hA           A.58.GLU*A.58.GLUGLU
1q1hA           A.80.TRP*A.54.LEUASN
1wpwA          A.31.TYR*A.295.LYSALA
1wpwA         A.252.PHE*A.279.METMET
1wpwA         A.293.TYR*A.284.METTYR
1wpwA            A.161.ARG*A.214.ASP
1wpwA             A.91.TYR*A.148.ARG
1wpwA      A.293.TYRILE*A.281.TYRGLU
1wpwA         A.194.TYR*A.195.SERGLU
1wpwA         A.117.GLU*A.117.GLUASN
1wpwA            A.229.GLU*B.229.GLU
1wpwA        A.52.GLUALA*A.54.LEUPRO
1wpwA            A.198.TYR*A.171.ASN
1wpwA      A.315.THRPRO*A.320.GLYASN
1srqA            A.297.PHE*A.223.PHE
1srqA            A.174.TYR*A.404.HIS
1srqA         A.141.VALILE*A.140.ASP
1srqA             A.371.ASN*A.82.GLU
1srqA         A.194.LYSPHE*A.291.ASP
1srqA         A.139.HIS*A.140.ASPVAL
1srqA            A.239.PHE*A.192.ASN
1srqA         A.345.PHEGLY*A.344.PHE
1srqA         A.275.THRGLU*A.274.TYR
1srqA         A.257.CYSASN*A.256.TYR
1srqA         A.297.PHE*A.298.GLNASP
1srqA         A.199.TYR*A.200.GLNLYS
1srqA             A.128.ARG*A.93.HIS
1srqA        A.97.LYSGLU*B.97.LYSGLU
1srqA          A.374.TYR*A.82.GLUCYS
2qcqA            A.9.ALAARG*A.11.ARG
2qcqA              A.35.TYR*A.10.ARG
2qcqA               A.6.ARG*A.11.ARG
2qcqA               A.4.GLU*A.11.ARG
2qcqA           A.36.TYR*A.11.ARGTYR
2qcqA           A.93.ASN*A.91.ASNLYS
2qcqA           A.32.PHE*A.33.ASPALA
4co3A            A.9.LYSPRO*A.11.PHE
2hzcA         A.183.GLYASN*A.203.ARG
2hzcA         A.184.ASNPRO*A.203.ARG
2hzcA            A.168.PHE*A.219.PHE
2hzcA            A.197.PHE*A.192.ASN
2hzcA         A.202.PHE*A.207.GLUTHR
2hzcA         A.152.TYR*A.153.VALGLY
3r45C           C.24.ALASER*C.28.ARG
3r45C           C.35.ARG*C.31.ARGARG
3r45C           C.23.ARGALA*C.27.ARG
3r45C             C.29.PHE*A.104.HIS
3bg1B            B.144.PHE*A.216.ARG
3bg1B         B.485.GLNLEU*B.487.HIS
3bg1B            B.275.GLN*B.271.TRP
3bg1B         B.237.SERSER*B.217.PHE
3bg1B            B.410.PHE*B.376.GLU
3bg1B         B.209.GLNILE*B.202.ARG
3bg1B         B.295.PHE*B.356.LYSILE
3bg1B            B.148.TYR*B.144.PHE
3bg1B             B.547.TYR*A.24.TYR
3bg1B            B.414.TYR*F.143.ARG
3bg1B         B.395.ASPGLU*B.397.TYR
3df6A              A.79.ARG*A.57.PHE
3df6A           A.77.TYR*A.57.PHEILE
3df6A           A.52.GLU*A.52.GLUASN
3df6A        A.22.ILELYS*A.20.ASPARG
3df6A           A.91.LYSGLY*A.25.PHE
3df6A           A.61.TYR*A.59.ASPGLU
3df6A           A.92.GLYVAL*A.17.PHE
3df6A               A.21.ARG*C.6.PHE
3df6A              A.98.ARG*A.68.ASN
3df6A           A.67.GLU*A.67.GLUASN
3lagA           A.31.HIS*A.75.GLNHIS
3lagA              A.66.ARG*B.10.GLN
3lagA              A.10.GLN*B.66.ARG
3lagA           A.38.TYR*A.70.ARGLYS
3lagA              A.38.TYR*A.34.HIS
3lagA           A.30.GLYHIS*A.77.ASP
3lagA           A.31.HIS*A.76.HISASP
2gtlN         N.199.ARGGLY*N.201.ASP
2gtlN           N.92.ALAHIS*N.94.ASP
2gtlN         N.216.HIS*N.217.GLNCYS
2gtlN           N.68.GLNCYS*N.67.PHE
2gtlN            N.190.HIS*N.166.PHE
2gtlN            N.173.ASN*N.144.ARG
2gtlN         N.173.ASNPHE*N.172.TYR
2gtlN            N.208.HIS*N.217.GLN
2gtlN          N.213.ALATHR*E.17.HIS
2gtlN           N.85.GLYHIS*N.95.GLU
2bw3A         A.444.GLNGLU*A.445.GLU
2bw3A         A.237.VALGLU*A.238.GLU
2bw3A            A.607.PHE*A.603.PHE
2bw3A            A.268.HIS*A.319.TRP
2bw3A         A.191.PHELEU*A.182.TRP
2bw3A         A.462.GLULEU*A.466.ARG
2bw3A         A.303.LEUGLN*A.305.HIS
2bw3A         A.575.PHE*A.571.SERGLU
2bw3A         A.323.TYR*A.364.LEUASP
2bw3A         A.115.SERGLY*B.104.ARG
2bw3A         A.559.LEUSER*A.199.HIS
2bw3A         A.100.GLN*A.100.GLNTRP
2bw3A         A.104.ARG*B.115.SERGLY
2bw3A         A.538.PHE*A.539.LYSVAL
2bw3A            A.543.TRP*A.547.ASN
2bw3A         A.216.PHE*A.188.LYSARG
2bw3A            A.130.GLU*A.131.TYR
2bw3A          A.123.PHE*B.93.GLUALA
2bw3A         A.262.ARG*A.262.ARGILE
2bw3A            A.444.GLN*A.433.PHE
2bw3A              A.77.HIS*A.81.ARG
2bw3A         A.545.ASN*A.201.ASNASN
2evbA      A.121.ARGASP*A.100.ARGVAL
2f9nA              A.79.GLN*A.75.TYR
2f9nA       A.103.ILEALA*A.55.ALAALA
2f9nA         A.164.GLU*A.164.GLUASN
2f9nA           A.94.PHE*A.95.TYRILE
2f9nA           A.94.PHE*A.56.ALAHIS
2f9nA              A.75.TYR*B.75.TYR
2f9nA           A.41.PHECYS*A.40.HIS
2f9nA         A.152.PROPHE*A.153.PHE
2f9nA       A.43.GLYGLY*A.196.GLYGLY
2f9nA           A.29.TRP*A.27.TRPPRO
2f9nA         A.158.VALLYS*A.137.TRP
2f9nA           A.98.GLN*A.98.GLNTHR
3v7bA         A.117.GLN*A.117.GLNLYS
3v7bA           A.16.PROGLN*A.17.GLN
3v7bA        A.52.THRPRO*A.50.PHEASP
3v7bA           A.57.PHE*A.55.CYSVAL
3v7bA               A.9.PHE*A.10.ASP
3v7bA           A.18.GLYARG*A.58.TRP
3v7bA             A.105.ARG*B.62.GLU
3v7bA          A.145.ARG*A.27.TYRLEU
3v7bA               A.9.PHE*A.81.ARG
3h3nO         O.275.ASN*O.258.GLULYS
3h3nO            O.474.GLU*O.421.GLN
3h3nO      O.434.ALAALA*O.436.ASNLEU
3h3nO      O.348.ALAPHE*O.362.ARGGLY
3h3nO         O.255.METALA*O.257.PHE
3h3nO         O.387.TYRGLN*O.487.TRP
3h3nO         O.119.ASPGLY*O.121.HIS
3h3nO         O.403.ASP*O.404.ILEPRO
3h3nO             O.108.GLN*O.45.TRP
3h3nO         O.471.PHE*O.420.METGLN
3h3nO         O.183.ASP*O.243.METALA
3h3nO              O.54.TRP*O.58.GLN
3h3nO         O.193.TYR*O.199.GLUTRP
3h3nO             O.84.ARG*O.189.ARG
3h3nO         O.357.TRP*O.353.GLYALA
3h3nO          O.173.LYSLEU*O.54.TRP
3h3nO           O.36.PHE*O.15.THRSER
3h3nO           O.39.TYR*O.37.PROGLN
3h3nO         O.349.PHE*O.347.PROALA
3h3nO           O.12.GLN*O.12.GLNGLY
3h3nO             O.454.PHE*O.24.ARG
3h3nO             O.71.ARG*X.231.TYR
3h3nO         O.164.GLYTHR*O.163.PHE
3h3nO         O.231.TYR*O.229.ARGSER
3h3nO         O.298.LYSVAL*O.300.TYR
3h3nO      O.453.GLYPHE*O.455.TRPLYS
3h3nO         O.344.TYR*O.486.GLYTRP
3h3nO            O.480.ARG*O.428.ASP
3h3nO         O.271.PHE*O.269.GLYALA
3h3nO           O.6.TYRVAL*O.454.PHE
3h3nO            O.379.ARG*O.341.ASN
3h3nO            O.383.GLN*O.422.PHE
3h3nO         O.193.TYR*O.198.LEUGLU
3h3nO             O.231.TYR*X.71.ARG
3h3nO            O.186.ASN*O.167.ASP
3h3nO         O.194.ASNILE*O.193.TYR
3h3nO         O.499.PHE*O.500.LYSALA
3majA         A.168.GLN*A.168.GLNALA
3majA      A.243.ALAALA*A.274.ARGALA
3majA           A.55.PROGLU*A.59.ARG
3majA            A.226.ARG*A.229.ARG
3majA      A.108.PROPRO*A.110.LEULEU
3majA         A.250.LEUILE*A.254.ARG
3majA         A.205.THRARG*A.206.ARG
3majA      A.135.ASNALA*A.133.SERARG
3majA           A.97.TYR*A.91.ALAPRO
3majA           A.71.SERGLU*A.25.ARG
3majA      A.169.ALAALA*A.144.ALAGLY
3majA            A.264.PHE*A.262.GLU
3majA             A.35.ARG*A.106.ASP
3majA         A.136.ALASER*A.274.ARG
3majA         A.357.ARG*A.353.PROALA
1x8bA         A.433.PHE*A.431.ASNILE
1x8bA         A.362.TYR*A.350.HISALA
1x8bA         A.301.GLULEU*A.300.HIS
1x8bA         A.363.PHESER*A.362.TYR
1x8bA            A.294.ARG*A.366.TRP
1x8bA            A.371.HIS*A.329.ARG
1x8bA         A.348.TYR*A.344.LEUARG
1x8bA         A.486.GLU*A.484.ALAASN
1x8bA            A.523.TRP*A.527.ARG
1x8bA         A.416.TYR*A.355.GLNHIS
1x8bA         A.378.TYR*A.379.CYSASN
1x8bA            A.301.GLU*A.314.PHE
1x8bA            A.416.TYR*A.356.HIS
1x8bA         A.397.TYR*A.395.METSER
1x8bA         A.355.GLNHIS*A.361.ARG
1x8bA         A.490.GLUASN*A.492.TYR
1x91A        A.13.ASNPRO*A.11.THRLEU
1x91A           A.47.GLN*A.43.ALAARG
1x91A       A.100.LYSVAL*A.81.ASNLEU
1x91A      A.120.SERVAL*A.118.LEUARG
3evfA         A.129.LYSTHR*A.107.ARG
3evfA           A.94.GLN*A.93.ALAGLN
3evfA           A.22.ARG*A.22.ARGGLN
3evfA           A.37.ARG*A.56.SERARG
3evfA              A.94.GLN*A.90.TYR
3evfA          A.139.LYSCYS*A.76.ARG
3evfA           A.9.GLYGLU*A.187.TYR
3evfA         A.234.ASNGLN*A.238.ARG
3evfA         A.187.TYR*A.185.ALAPRO
3evfA            A.133.HIS*A.163.ARG
3evfA             A.87.TRP*A.146.ASP
3evfA         A.222.VALSER*A.179.PHE
3evfA              A.64.TRP*A.68.ARG
2otnA         A.214.ARGVAL*A.213.PHE
2otnA            A.262.TRP*A.245.ARG
2otnA           A.22.PHE*A.54.CYSPRO
2otnA           A.31.LEUALA*A.66.PHE
2otnA           A.2.SERGLN*A.284.TYR
2otnA        A.97.VALPHE*A.95.ASPTHR
2otnA         A.282.TYR*A.283.GLUTYR
2otnA         A.168.HIS*A.228.THRGLY
2otnA      A.194.PHEPRO*A.192.GLUMET
2otnA         A.216.TRP*A.185.GLYPRO
2otnA         A.264.GLU*A.245.ARGGLY
2otnA              A.90.HIS*A.86.TYR
2otnA         A.132.ARG*A.139.GLYGLU
2otnA         A.221.GLYVAL*A.216.TRP
2otnA         A.132.ARG*A.140.GLUGLY
2otnA           A.6.PHE*A.280.GLYVAL
2otnA         A.150.PHE*A.151.LEUTYR
4mubA         A.187.ARG*A.187.ARGLEU
4mubA         A.224.TYR*A.206.GLYTRP
4mubA         A.115.ARG*A.119.ASPTRP
4mubA         A.197.ARG*A.106.PROASN
4mubA             A.97.PHE*A.163.PHE
4mubA         A.181.CYSTYR*A.165.PHE
4mubA            A.120.TRP*A.182.TYR
4m9qA         A.208.ARG*A.207.ALAARG
4m9qA             A.83.TYR*B.151.ARG
4m9qA           A.92.TYR*A.25.LEUGLY
4m9qA            A.116.GLN*A.117.PHE
4m9qA             A.151.ARG*C.83.TYR
4m9qA          A.53.PHE*B.152.ASNSER
3cnqP           P.46.ALAALA*P.41.PHE
3huhA              A.47.PHE*A.61.PHE
3huhA           A.64.GLNLYS*A.61.PHE
3huhA           A.52.PHE*A.56.ARGLYS
3huhA              A.75.PHE*A.56.ARG
4nyhA            A.137.PHE*A.141.ASN
4nyhA              A.30.HIS*B.34.ARG
4nyhA            A.157.ASN*A.192.ARG
4nyhA         A.197.GLU*A.197.GLUASP
4nyhA         A.115.PHE*B.193.GLNASN
4nyhA          A.150.VALHIS*A.53.PHE
4nyhA         A.193.GLNASN*C.115.PHE
4nyhA         A.111.TYR*A.112.LEULYS
4nyhA            A.192.ARG*A.119.HIS
4nyhA              A.97.GLN*A.30.HIS
4nyhA              A.43.GLN*A.83.GLN
4oloA              A.44.GLU*A.41.ARG
2pa8L           L.40.PHE*L.41.ALASER
2pa8L        L.47.HISPRO*L.45.GLNPRO
2pa8L           L.60.ASPGLY*L.11.ASN
2pa8L           L.43.TYR*L.25.GLYASN
2pa8L           L.13.LEUGLU*L.12.TYR
2pa8L           L.33.ARG*L.29.ALAGLY
2x9gA         A.251.TYR*B.260.ASPGLY
2x9gA              A.35.HIS*A.62.ASP
2x9gA             A.81.PHE*A.141.ARG
2x9gA            A.243.PHE*B.243.PHE
2x9gA         A.103.VALGLN*A.104.GLN
2x9gA              A.35.HIS*A.36.ASN
2x9gA           A.34.TYR*A.37.SERALA
2x9gA           A.34.TYR*A.59.CYSGLN
2x9gA           A.84.PHE*A.29.ARGVAL
2x9gA          A.98.TYRPRO*A.171.PHE
2x9gA      A.179.HISALA*C.179.HISALA
2x9gA         A.260.ASPGLY*B.251.TYR
2x9gA           A.78.ASNSER*A.82.ARG
2x9gA         A.223.ARG*A.219.ASPLYS
2x9gA      A.222.ARGARG*A.229.ARGARG
2x9gA           A.81.PHE*A.86.ARGCYS
2x9gA           A.60.GLN*A.60.GLNALA
2x9gA              A.24.HIS*A.52.ARG
2x9gA           A.33.HIS*A.34.TYRHIS
3phsA           A.75.ASP*A.77.ASPLEU
3phsA          A.141.GLUASP*A.31.HIS
3phsA           A.61.GLU*A.61.GLUGLY
3phsA         A.120.GLYLEU*A.119.TYR
3phsA          A.119.TYR*A.82.TRPASN
3phsA            A.213.ARG*A.211.HIS
3phsA          A.31.HIS*A.140.SERGLU
3phsA         A.104.GLNGLN*A.105.GLN
3phsA      A.237.GLNALA*A.239.GLUTHR
3phsA         A.120.GLYLEU*A.135.PHE
2wuqA           A.95.ARG*B.94.ALAARG
2wuqA         A.284.SERGLN*A.285.GLN
2wuqA           A.99.ASP*A.68.GLYALA
2wuqA            A.142.HIS*A.188.ASN
2wuqA            A.251.TRP*A.244.PHE
2wuqA         A.266.GLYVAL*A.251.TRP
2wuqA         A.135.PHE*A.133.TRPGLY
2wuqA         A.299.ALAGLN*A.243.ASP
2wuqA             A.100.ASP*B.90.PHE
2wuqA           A.71.GLN*A.96.VALALA
2wuqA             A.90.PHE*B.100.ASP
2wuqA            A.313.HIS*A.274.GLN
2wuqA            A.310.ARG*A.270.HIS
2wuqA           A.94.ALAARG*B.95.ARG
2wuqA            A.128.GLN*A.132.GLU
4jjjA         A.551.ARGLEU*A.184.TRP
4jjjA         A.106.ILEPRO*A.105.TYR
4jjjA             A.97.TYR*A.316.ARG
4jjjA         A.478.TRP*A.480.GLYTHR
4jjjA         A.487.ASNLEU*A.489.HIS
4jjjA       A.99.PROASN*A.101.SERPRO
4jjjA              A.46.HIS*A.31.TYR
4jjjA            A.301.TYR*A.221.ASN
4jjjA         A.414.TRP*A.416.GLYPHE
4jjjA            A.224.ASN*A.326.TYR
4jjjA         A.324.GLN*A.324.GLNGLY
4jjjA         A.304.GLYGLY*A.315.TRP
4jjjA         A.303.TRP*A.219.TYRTHR
4jjjA         A.173.ASNTHR*A.189.HIS
4jjjA            A.584.PHE*A.588.ARG
4jjjA            A.482.TYR*A.364.GLN
4jjjA         A.556.TRP*A.558.GLYSER
4jjjA         A.394.GLNPHE*A.365.TRP
4jjjA         A.305.GLYSER*A.217.TRP
4jjjA         A.267.METPHE*A.294.HIS
4jjjA         A.304.GLYGLY*A.217.TRP
4jjjA         A.564.VALPRO*A.563.TYR
4jjjA           A.70.TRP*A.64.GLYARG
4jjjA         A.305.GLYSER*A.313.TRP
4jjjA           A.11.GLU*A.11.GLULYS
4jjjA            A.127.GLN*A.100.ASN
4jjjA            A.358.ARG*A.396.TYR
4jjjA         A.569.SERGLY*A.568.TRP
4jjjA         A.478.TRP*A.481.THRTYR
4jjjA              A.63.TYR*A.10.TYR
4jjjA         A.590.PHE*A.588.ARGSER
4jjjA            A.234.PHE*A.238.GLU
4jjjA            A.402.TRP*A.403.GLN
4jjjA         A.235.TRPALA*A.239.TRP
4jjjA         A.173.ASN*A.174.THRTYR
4jjjA           A.98.ASNPRO*A.97.TYR
4jjjA         A.400.TYR*A.401.ASPTRP
4jjjA           A.31.TYR*A.21.PHEARG
4jjjA          A.631.ALAALA*A.62.TYR
4jjjA         A.195.PHE*A.201.ASNGLY
4jjjA         A.543.THRPRO*A.616.GLU
4jjjA         A.403.GLNPRO*A.401.ASP
4jjjA         A.512.TYR*A.441.LEUASP
4jjjA            A.111.ASN*A.180.ARG
4jjjA         A.303.TRPGLY*A.315.TRP
4jjjA         A.158.PHE*A.189.HISPRO
4jjjA            A.407.ASN*A.403.GLN
4jjjA      A.190.PROSER*A.192.CYSASP
4jjjA         A.556.TRP*A.559.SERGLU
4jjjA         A.432.THRGLY*A.515.ARG
4jjjA            A.299.TRP*A.326.TYR
4jjjA      A.509.LEUMET*A.521.ALALEU
1xttA            A.122.TYR*D.123.TYR
1xttA          A.28.PHE*A.213.ARGALA
1xttA              A.189.PHE*A.4.TYR
1xttA        A.36.GLYARG*A.88.GLYLEU
1xttA             A.215.PHE*D.98.GLN
1xttA              A.37.ARG*B.37.ARG
1xttA          A.80.ARG*A.211.GLYASP
1xttA         A.124.LYSLYS*A.123.TYR
1xttA         A.122.TYR*A.102.GLYALA
1xttA           A.67.ILETHR*A.66.ASP
2w1rA         A.125.GLYILE*A.121.GLN
2w1rA         A.154.ASPGLN*A.131.ASN
2w1rA          A.151.PHE*A.73.SERVAL
1wlyA      A.244.GLYHIS*A.221.SERILE
1wlyA           A.48.ARG*A.12.GLYPRO
1wlyA         A.269.ARG*A.243.TYRGLY
1wlyA         A.306.PHE*A.313.ALAALA
1wlyA         A.197.TYR*A.177.VALSER
1wlyA         A.142.LYSVAL*A.141.HIS
1wlyA            A.135.TYR*A.275.TYR
1wlyA      A.141.HISLYS*A.138.HISGLN
1wlyA            A.100.GLN*A.332.GLN
1wlyA         A.299.HIS*A.300.SERSER
1wlyA            A.3.METALA*A.18.TRP
1wlyA         A.208.GLU*A.204.GLUVAL
1wlyA         A.233.CYSLEU*A.207.ARG
1wlyA      A.141.HISLYS*A.139.GLNTHR
1wlyA         A.281.GLU*A.275.TYRMET
1wlyA         A.321.ARG*A.323.THRILE
1wlyA          A.102.ARG*A.96.GLYALA
1wlyA            A.192.HIS*A.167.ARG
1wlyA         A.243.TYR*A.220.ASPSER
1wlyA           A.32.ARG*A.73.GLUGLU
1wlyA         A.134.GLN*A.134.GLNTYR
4gm2A          A.77.TYRPRO*A.117.ASN
4gm2A         A.236.LEUILE*A.162.ARG
4gm2A         A.155.SERSER*A.208.ASN
4gm2A         A.119.ASNGLY*A.117.ASN
4gm2A            A.230.GLU*A.227.ASN
4gm2A           A.94.GLU*A.94.GLUSER
4gm2A      A.150.ALACYS*A.146.ALATYR
4gm2A            A.103.TYR*A.141.TYR
4gm2A         A.105.ASN*A.143.LEUGLY
4gm2A      A.186.ASNILE*A.184.ALATHR
4gm2A            A.161.TYR*A.139.TYR
2h5eA         A.326.GLULYS*A.325.TYR
2h5eA            A.133.ARG*A.282.ARG
2h5eA         A.267.HISMET*A.255.PHE
2h5eA            A.485.PHE*A.489.ASN
2h5eA            A.452.ARG*A.314.ARG
2h5eA            A.399.ARG*A.446.PHE
2h5eA         A.475.GLUCYS*A.482.PHE
2h5eA         A.521.VALGLN*A.522.GLN
2h5eA         A.183.TYR*A.184.HISLEU
2h5eA         A.256.PHEGLY*A.140.PHE
2h5eA             A.120.GLU*A.21.HIS
2h5eA            A.400.ARG*A.435.ASP
2h5eA         A.141.METASN*A.140.PHE
2h5eA         A.149.ARG*A.117.LYSGLY
2h5eA             A.122.ARG*A.95.PHE
2h5eA         A.297.THRGLY*A.296.PHE
2h5eA            A.426.GLN*A.392.ASN
2h5eA            A.374.GLN*A.335.ARG
2h5eA            A.472.ARG*A.525.GLN
2h5eA            A.241.PHE*A.275.TRP
2h5eA            A.124.ARG*B.160.ASN
2h5eA           A.89.THRPRO*A.88.ASP
2h5eA              A.79.TYR*A.80.HIS
2h5eA         A.301.PHE*A.317.PHEMET
2h5eA            A.160.ASN*B.124.ARG
2h5eA         A.194.GLNSER*A.193.TYR
2h5eA      A.178.LEUPHE*A.175.CYSGLY
2h5eA         A.241.PHE*A.242.ASPLYS
2h5eA         A.516.GLU*A.516.GLUARG
2h5eA         A.498.GLYASP*A.500.ASN
2h5eA         A.405.ASP*A.403.LEULYS
2h5eA         A.124.ARG*A.120.GLUASP
2h5eA         A.127.METGLU*A.131.ARG
3n8hA         A.242.PHE*A.249.LEUILE
3n8hA          A.33.HIS*A.184.LEUSER
3n8hA         A.230.TYR*A.240.LEUALA
3n8hA              A.33.HIS*A.36.HIS
3n8hA           A.77.ASP*A.73.GLNLEU
3n8hA           A.47.ASN*A.23.ILEGLY
3n8hA         A.230.TYR*A.116.LEUGLU
3n8hA         A.237.ARG*A.253.PHELEU
3n8hA          A.42.LYSALA*A.145.TYR
3n8hA           A.47.ASN*A.46.GLUASN
3n8hA         A.180.SERGLY*A.207.ARG
3n8hA         A.258.GLYPRO*A.253.PHE
3n8hA           A.56.VALASN*A.55.PHE
3n8hA            A.124.HIS*A.121.ARG
3n8hA         A.181.GLYLEU*A.203.TYR
3n8hA              A.90.PHE*A.10.PHE
3n8hA           A.26.VALPRO*A.25.PHE
4ecgA         A.373.ASN*A.367.GLYTYR
4ecgA            A.107.ARG*A.111.GLU
4ecgA         A.163.GLYPRO*A.165.GLN
4ecgA         A.374.LEUGLY*A.280.TRP
4ecgA         A.337.LEUHIS*A.321.TYR
4ecgA         A.304.TRP*A.180.ASPGLY
4ecgA         A.328.ASPGLU*A.322.PHE
4ecgA            A.191.PHE*A.184.ARG
4ecgA         A.306.SERLEU*A.310.TYR
4ecgA            A.168.ARG*A.205.ARG
4ecgA         A.168.ARG*A.164.PROGLN
3o60A              A.71.GLN*A.25.TYR
3o60A               A.4.TYR*B.16.ARG
3o60A      A.139.PHESER*A.141.ASPSER
3o60A              A.31.PHE*A.36.ARG
4u1eG        G.75.LEUGLY*G.73.ALAARG
4u1eG           G.55.TRP*I.81.VALSER
4u1eG           G.48.SERVAL*G.52.ARG
4u1eG           G.67.GLYPRO*I.43.GLU
4u1eG           G.58.TYR*I.45.LEUGLY
4u1eG        G.57.LYSTYR*G.61.GLULYS
4u1eG           G.58.TYR*I.83.ASNGLY
3fanA         A.134.THRGLY*A.133.HIS
3fanA          A.100.GLU*A.99.VALGLU
3fanA           A.26.PHE*A.24.GLYVAL
3fanA           A.66.ALAILE*A.65.PHE
3fanA          A.146.ARGPRO*A.65.PHE
3fanA           A.112.PHETHR*A.3.PHE
3fanA         A.110.PHE*A.111.CYSPHE
3fanA         A.188.GLU*A.171.VALPRO
3fanA        A.41.LEUTHR*A.43.GLYASN
3fanA           A.47.ARG*A.55.GLNMET
3fanA           A.88.THRGLY*A.87.TRP
4g1kA         A.170.TYR*A.171.GLUPRO
4g1kA         A.227.ASPILE*A.229.ASP
4g1kA         A.225.GLN*A.184.ALAGLU
4g1kA            A.138.ARG*A.174.TRP
4g1kA          A.101.GLU*B.77.ALATYR
4g1kA           A.85.GLYMET*B.18.ARG
4g1kA          A.77.ALATYR*B.101.GLU
4g1kA              A.195.ARG*A.5.ARG
4g1kA           A.90.PHEGLY*A.55.GLN
4g1kA              A.73.HIS*A.78.TYR
4g1kA            A.150.GLN*A.103.ARG
4g1kA           A.91.GLYALA*A.65.TRP
4g1kA      A.198.LEUALA*A.203.ALAGLY
4g1kA           A.22.ASN*A.18.ARGLEU
4g1kA           A.78.TYR*A.76.GLYALA
4g1kA        A.48.PHEPRO*B.48.PHEPRO
4g1kA         A.244.LEUALA*A.248.ARG
4g1kA         A.172.PROVAL*A.174.TRP
4g1kA           A.65.TRP*A.54.ALAGLN
4g1kA             A.69.ASP*A.102.ARG
4g1kA         A.230.GLYGLY*A.223.PHE
4g1kA            A.193.PHE*A.144.GLU
4g1kA           A.18.ARG*B.85.GLYMET
4g1kA         A.102.ARGARG*A.108.GLU
4g1kA            A.102.ARG*A.106.HIS
4e79A         A.123.ILEGLY*A.122.TYR
4e79A         A.318.TRP*B.307.SERSER
4e79A              A.45.PHE*A.89.PHE
4e79A            A.188.PHE*C.237.ASP
4e79A         A.162.TYR*B.162.TYRVAL
4e79A         A.162.TYRVAL*C.162.TYR
4e79A              A.41.ASN*A.42.HIS
4e79A           A.25.GLYSER*A.11.ASP
4e79A         A.222.ARG*A.185.GLYGLU
4e79A         A.301.SERGLU*A.302.GLU
4e79A         A.158.PHE*A.159.ILEASP
4e79A            A.237.ASP*B.188.PHE
4e79A         A.307.SERSER*C.318.TRP
4e79A            A.176.ARG*B.199.ARG
4e79A            A.125.HIS*A.106.GLU
4e79A           A.45.PHE*A.85.PROTYR
4e79A         A.241.GLN*A.242.ILEALA
4e79A         A.173.ASPARG*A.174.ARG
4e79A           A.96.PHE*A.31.ASNLEU
4e79A            A.199.ARG*C.176.ARG
4e79A         A.314.GLU*A.314.GLUASN
2dknA           A.26.HIS*A.24.ALAGLY
2dknA        A.38.ILEGLU*A.36.ALAASP
2dknA            A.247.ASP*A.241.PHE
2dknA           A.48.ARG*A.88.PHEGLY
2dknA         A.234.PHE*B.243.ASPGLY
2dknA             A.99.GLU*A.103.ARG
2dknA         A.202.GLU*A.202.GLUSER
2dknA         A.122.ALAALA*A.158.TYR
2dknA           A.48.ARG*A.44.THRPRO
2dknA         A.170.ASPTRP*A.174.ARG
2dknA            A.199.ARG*A.200.TYR
2dknA             A.136.GLU*A.88.PHE
2dknA            A.226.PHE*B.226.PHE
2dknA         A.243.ASPGLY*B.234.PHE
2dknA         A.234.PHE*B.214.GLYSER
2dknA           A.48.ARG*A.43.SERTHR
2dknA         A.214.GLYSER*B.234.PHE
2wiuB           B.28.GLNSER*B.39.GLN
2wiuB            B.9.SERPRO*D.58.PHE
2wiuB            B.58.PHE*D.8.TYRSER
2wiuB              B.86.TRP*A.37.TYR
2wiuB            B.8.TYRSER*D.58.PHE
2wiuB          B.12.GLN*A.323.GLYSER
2wiuB            B.58.PHE*D.9.SERPRO
3d3yA            A.333.GLU*A.290.ASN
3d3yA         A.120.GLN*A.119.ILEGLN
3d3yA         A.391.ARGILE*A.270.PHE
3d3yA         A.296.HIS*A.294.LYSGLU
3d3yA         A.194.ALAGLU*A.223.ARG
3d3yA         A.328.ARG*A.324.ASNGLN
3d3yA            A.349.GLN*A.284.HIS
3d3yA         A.414.PHELEU*A.413.PHE
3d3yA         A.233.ASNGLN*A.232.TYR
3d3yA           A.84.TRPPHE*A.86.ASN
3d3yA         A.300.TYR*A.316.THRGLY
3d3yA         A.418.GLU*A.246.ARGGLU
3d3yA              A.90.ASN*A.23.ARG
3d3yA         A.169.PROSER*A.171.PHE
3d3yA             A.12.HIS*A.201.PHE
3d3yA            A.388.TRP*A.358.TYR
3d3yA            A.416.GLU*A.246.ARG
3d3yA         A.125.GLU*A.125.GLUALA
3d3yA          A.29.ASNTHR*A.196.ASP
3d3yA              A.84.TRP*A.27.ARG
3d3yA         A.129.PHE*A.181.THRALA
3d3yA            A.159.TYR*A.311.PHE
3d3yA         A.154.ALALEU*A.413.PHE
3ha2A      A.116.PHETHR*A.108.PHEGLN
3ha2A         A.155.ARG*A.151.ASPALA
3ha2A           A.88.TYR*A.84.THRGLY
3ha2A      A.115.LYSPHE*A.109.GLNALA
3ha2A         A.144.GLN*A.103.ASPASN
3ha2A         A.143.HIS*A.141.ALAVAL
3ha2A              A.46.GLN*A.82.PHE
4rohA         A.457.VALASN*A.444.TRP
4rohA            A.498.ASP*A.484.TRP
4rohA         A.455.TYR*A.447.ARGTHR
4rohA            A.458.ASN*A.444.TRP
4rohA         A.495.TYR*A.487.ARGPHE
4rohA            A.496.PHE*A.508.ASP
4rohA         A.467.GLUASP*A.456.PHE
4rohA         A.502.ARGTHR*C.334.TYR
4rohA         A.497.VALASP*A.484.TRP
2omlA         A.116.ILEPRO*A.189.PHE
2omlA         A.147.PROALA*A.149.TRP
2omlA         A.122.LEUGLU*A.126.ARG
2omlA            A.151.TRP*A.209.ASN
2omlA           A.77.ARG*A.52.PROGLN
2omlA      A.153.ARGASN*A.155.PROPRO
2omlA             A.48.TYR*A.153.ARG
2omlA      A.189.PHEPRO*A.184.THRALA
2omlA           A.63.LEULYS*A.54.PHE
2omlA              A.95.GLN*A.73.TYR
2omlA           A.45.ASNLYS*A.44.PHE
2omlA             A.81.ASP*A.181.ARG
2omlA         A.111.VALGLN*A.167.TRP
4eogA         A.253.PHE*A.251.ASNGLY
4eogA         A.261.TYR*A.324.TYRPRO
4eogA      A.459.TYRLYS*A.461.ASPLYS
4eogA         A.458.PHE*A.445.TYRVAL
4eogA             A.167.HIS*A.16.TRP
4eogA         A.468.LEUALA*A.433.PHE
4eogA              A.15.GLN*A.12.ASN
4eogA           A.22.GLU*A.22.GLUTYR
4eogA         A.476.ARGGLY*A.475.TYR
4eogA              A.93.GLU*A.31.ARG
4eogA         A.156.GLNASN*A.191.TYR
4eogA         A.239.LYSLEU*A.243.ASN
4eogA           A.16.TRP*A.12.ASNPRO
4eogA         A.212.ARG*A.208.SERGLN
4eogA           A.85.ARG*A.56.ASNTYR
4eogA         A.301.ASPARG*A.143.TYR
4eogA           A.58.TYR*A.59.ASPSER
4eogA         A.234.SERPRO*A.306.ASN
4eogA           A.57.TYR*A.58.TYRASP
4eogA            A.367.TRP*A.365.ARG
4eogA         A.374.LYSILE*A.367.TRP
4eogA         A.477.GLYGLU*A.478.GLU
4eogA         A.139.LEUASP*A.143.TYR
4eogA      A.118.ILETHR*A.116.GLUARG
3f7sA              A.47.PHE*A.56.HIS
3f7sA         A.121.HIS*A.122.GLUHIS
4nqiA              A.25.ASN*B.64.HIS
4nqiA              A.64.HIS*B.25.ASN
4nqiA         A.170.ASNLYS*A.174.ASP
4nqiA           A.41.GLN*A.41.GLNGLN
4nqiA              A.236.GLN*B.9.ASN
3mznA             A.96.ARG*A.261.GLN
3mznA         A.133.GLN*B.316.GLNGLY
3mznA            A.295.GLN*B.328.TRP
3mznA         A.444.HIS*A.445.HISHIS
3mznA         A.332.TRP*A.333.GLYSER
3mznA           A.31.PHE*A.15.GLYGLU
3mznA           A.99.PHEASP*A.94.ARG
3mznA         A.368.GLNASP*A.365.TRP
3mznA         A.431.GLUPHE*A.430.TRP
3mznA              A.77.GLN*A.81.ARG
3mznA         A.433.ASP*A.435.LYSARG
3mznA         A.337.ASNASN*A.364.HIS
3mznA          A.419.ASP*A.26.GLYHIS
3mznA          A.409.TYR*A.12.PROVAL
3mznA             A.99.PHE*A.417.ARG
3mznA         A.368.GLN*A.367.TRPGLN
3mznA            A.134.TYR*A.133.GLN
3mznA         A.197.PHE*A.144.LEUGLY
3mznA            A.299.GLN*B.299.GLN
3mznA            A.335.HIS*A.285.ASN
3mznA         A.313.TRP*A.289.THRASP
3mznA         A.433.ASPPRO*A.432.PHE
3mznA         A.316.GLNGLY*B.133.GLN
3mznA            A.256.GLU*A.231.ASP
3mznA             A.160.TYR*A.19.PHE
3mznA      A.382.ASPGLY*A.196.GLYPHE
3mznA         A.137.GLNARG*A.138.ARG
3mznA           A.33.ARG*A.50.ILEPRO
3mznA         A.355.PROGLY*A.326.ASN
1k8kF          F.93.PHE*D.266.METARG
1k8kF         F.148.GLUMET*D.265.ARG
1k8kF              F.93.PHE*F.97.ARG
1k8kF          F.21.CYSLEU*C.263.HIS
1k8kF           F.30.VALGLU*C.97.ARG
3a38A           A.55.GLU*A.55.GLUGLY
3a38A              A.41.GLN*A.78.TRP
3a38A           A.74.TRP*A.75.CYSALA
3a38A           A.61.CYSGLN*A.50.GLN
3a38A           A.79.THRLEU*A.78.TRP
3a38A           A.74.TRP*A.27.GLUARG
3a38A            A.67.LYSLEU*A.5.ASN
3a38A           A.20.ASNGLN*A.19.TYR
3a38A           A.28.ARG*A.23.ALATHR
3d6xA           A.89.PHETHR*A.88.TYR
3d6xA              A.37.ASN*F.37.ASN
3d6xA         A.106.ARGLEU*A.108.ASP
3d6xA         A.121.TRPILE*A.123.PHE
3d6xA              A.49.PHE*A.48.HIS
3d6xA           A.14.ARG*A.12.PROHIS
3a9sA            A.329.ASP*A.330.TRP
3a9sA         A.303.GLYPHE*A.339.PHE
3a9sA         A.558.HISASN*A.518.PHE
3a9sA         A.302.ALAGLY*A.339.PHE
3a9sA            A.265.TRP*A.450.TYR
3a9sA         A.383.THRLEU*A.382.TYR
3a9sA            A.481.GLU*A.539.HIS
3a9sA         A.419.PROTYR*A.421.TYR
3a9sA         A.334.ARGALA*A.420.TYR
3a9sA            A.260.GLN*A.256.ARG
3a9sA       A.121.PROGLY*A.94.CYSTRP
3a9sA         A.302.ALAGLY*A.182.TYR
3a9sA      A.530.ALAASN*B.127.ALAALA
3a9sA         A.584.TYR*B.574.PHEGLY
3a9sA            A.532.HIS*A.531.ASN
3a9sA         A.354.GLYTYR*A.362.GLN
3a9sA         A.256.ARG*A.447.GLYGLY
3a9sA            A.478.GLN*A.528.TRP
3a9sA            A.310.TRP*A.314.PHE
3a9sA         A.509.VALPRO*A.508.PHE
3a9sA         A.405.GLYTHR*A.454.PHE
3a9sA         A.374.GLU*A.374.GLUALA
3a9sA            A.503.TRP*A.500.ASP
3a9sA              A.6.ARG*A.337.TYR
3a9sA            A.394.HIS*A.507.TRP
3a9sA      A.290.TYRGLY*A.285.LEUGLU
3a9sA            A.387.ARG*A.483.TYR
3a9sA            A.312.ASP*A.446.ARG
3a9sA         A.585.ARGALA*A.574.PHE
3a9sA         A.238.TRP*A.329.ASPTRP
3a9sA         A.398.SERGLY*A.503.TRP
3a9sA         A.227.TYR*A.225.GLYILE
3a9sA         A.567.ARGPRO*A.141.PHE
3a9sA            A.116.ASN*A.144.TYR
3a9sA         A.481.GLUGLY*A.511.ASN
3a9sA         A.585.ARG*A.581.GLYALA
3a9sA         A.183.LEUSER*A.182.TYR
3a9sA            A.559.ASN*A.518.PHE
3a9sA         A.574.PHEGLY*C.584.TYR
3a9sA      A.312.ASPTYR*A.446.ARGGLY
3a9sA         A.317.GLYASP*A.321.GLU
3a9sA      A.127.ALAALA*C.530.ALAASN
3a9sA            A.583.ASP*A.567.ARG
3a9sA         A.399.GLYALA*A.318.ASP
3a9sA         A.370.TYR*A.371.TRPSER
3aqbB       B.115.LEULEU*B.75.LEUVAL
3aqbB              B.77.HIS*B.48.ARG
3aqbB      B.101.ILEALA*B.103.PHEASP
3aqbB           B.59.ASN*B.60.ASPTHR
3aqbB           B.62.GLN*B.61.THRGLN
3aqbB            B.280.GLN*B.281.TYR
3aqbB         B.113.HISPHE*A.103.ASN
3aqbB      B.202.CYSILE*B.293.TYRGLY
3aqbB          B.100.HIS*B.85.ASPTYR
3aqbB       B.55.SERGLY*B.182.GLYALA
3aqbB         B.110.ARG*A.106.LYSSER
3aqbB             B.132.HIS*A.87.PHE
3aqbB         B.233.ASNGLY*B.235.HIS
3aqbB         B.154.PHE*B.233.ASNGLY
3aqbB            B.215.ASP*B.230.ASP
3aqbB             B.133.GLN*A.85.GLN
3aqbB         B.154.PHE*B.263.THRSER
3aqbB         B.140.LEUGLU*B.144.PHE
1v5xA              A.23.PHE*B.23.PHE
1v5xA              A.169.TYR*A.2.ARG
1v5xA              A.85.GLU*A.61.ASP
1v5xA          A.49.LEUGLY*B.148.ARG
1v5xA            A.103.PHE*A.113.TRP
1v5xA          A.148.ARG*B.49.LEUGLY
1a5zA              A.62.ASP*A.58.ARG
1a5zA         A.122.GLU*A.122.GLUILE
1a5zA        A.53.ASPVAL*A.55.ASPLYS
1a5zA         A.228.PHE*A.175.LEUILE
1a5zA             A.126.ASN*A.85.TYR
1a5zA         A.125.ARG*A.121.LYSGLU
1a5zA           A.45.PHE*A.43.LYSGLY
1a5zA         A.118.ARG*A.114.GLYARG
1a5zA         A.274.TYR*A.275.LEUGLU
1a5zA          A.130.TYR*A.85.TYRALA
1a5zA            A.308.ASN*A.311.GLU
2fyuK            K.12.GLN*K.8.PROARG
3s5uA           A.66.LEUGLY*F.36.TYR
3s5uA           A.69.ASPVAL*A.68.TYR
3s5uA          A.28.PHE*A.196.GLUGLN
3s5uA         A.197.GLN*A.197.GLNARG
3s5uA         A.216.TYR*A.204.PHEGLN
3s5uA         A.106.GLN*C.109.GLYTYR
3s5uA             A.19.PHE*A.194.PHE
4hdrA         A.192.PHE*A.274.LEUILE
4hdrA          A.69.HIS*A.180.GLYASN
4hdrA         A.104.ASNPHE*B.319.HIS
4hdrA         A.294.GLYGLU*A.316.ARG
4hdrA      A.153.ALAVAL*A.246.GLYALA
4hdrA            A.164.ARG*A.167.HIS
4hdrA      A.157.GLYILE*A.250.GLYVAL
4hdrA         A.134.TYR*A.118.ALAGLY
4hdrA              A.13.ARG*D.91.GLN
4hdrA          A.95.GLNGLY*A.100.ASN
4hdrA        A.52.GLULEU*A.54.ASNPRO
4hdrA         A.176.GLU*A.176.GLUMET
4hdrA             A.45.GLN*A.288.PHE
4nlmA         A.265.TYR*A.293.ALALYS
4nlmA          A.329.TYR*A.55.SERLYS
4nlmA            A.158.TRP*A.161.GLN
4nlmA         A.274.TYR*A.324.GLNPRO
4nlmA         A.272.VALPRO*A.271.PHE
4nlmA           A.48.GLNARG*A.47.PHE
4nlmA            A.188.ASN*A.211.ARG
4nlmA      A.197.LYSPRO*A.195.LYSASP
4nlmA         A.160.PHE*A.179.SERPRO
4nlmA              A.75.ASN*A.78.ASN
4nlmA         A.284.PHE*A.285.LEUTHR
4nlmA         A.165.TRPASP*A.164.ASN
4nlmA         A.260.ASNALA*A.259.TYR
4nlmA            A.188.ASN*A.187.ASP
4nlmA         A.165.TRP*A.166.ASPTYR
4nlmA         A.258.SERTYR*A.257.PHE
2zyoA            A.170.GLU*A.176.TYR
2zyoA              A.80.TRP*A.62.GLN
2zyoA          A.69.GLYPRO*A.289.TYR
2zyoA         A.250.TRP*A.248.GLYPRO
2zyoA         A.173.ASNPHE*A.367.HIS
2zyoA         A.211.GLYMET*A.181.PHE
2zyoA         A.263.GLYVAL*A.135.TYR
2zyoA            A.178.TYR*A.278.PHE
2zyoA         A.169.PHE*A.170.GLUALA
2zyoA         A.375.GLN*A.379.GLNALA
2zyoA         A.283.GLYTRP*A.285.TYR
2zyoA         A.365.ASNALA*A.369.PHE
2axoA         A.178.TYRPHE*A.204.TYR
2axoA            A.141.PHE*A.137.ARG
2axoA         A.233.GLYCYS*A.179.PHE
2axoA      A.141.PHELYS*A.146.GLNGLY
2axoA         A.102.TYRGLY*A.106.ARG
2axoA              A.49.PHE*A.78.TYR
2axoA         A.147.GLYLEU*A.149.ASN
2axoA            A.179.PHE*A.201.HIS
2axoA             A.49.PHE*A.101.GLN
2axoA           A.83.TRP*A.53.GLYCYS
2axoA            A.123.ARG*A.146.GLN
2axoA           A.61.ASP*A.57.CYSPRO
3t3lA            A.121.GLU*A.122.ASP
3t3lA         A.168.TRP*A.170.GLYLYS
3t3lA         A.172.ASN*A.173.TRPVAL
3t3lA         A.168.TRP*A.171.LYSASN
3t3lA         A.155.TRP*A.164.LYSARG
3t3lA         A.125.VALSER*A.124.ASP
3t3lA         A.127.PHE*A.103.LEUASP
4ue8A         A.127.PHE*A.132.ARGPRO
4ue8A         A.176.HIS*A.205.GLUALA
4ue8A         A.144.GLYARG*A.231.HIS
4ue8A         A.135.TRP*A.231.HISLYS
4ue8A         A.178.ASP*A.176.HISSER
4ue8A         A.145.ARGTRP*A.228.TYR
4ue8A         A.143.GLYGLY*A.231.HIS
4ue8A         A.127.PHE*A.182.GLYALA
4ue8A         A.121.GLYSER*A.188.ARG
4ue8A         A.127.PHE*A.181.CYSGLY
4ue8A           A.99.PHE*A.76.TRPTHR
4ue8A         A.228.TYR*A.229.GLNLEU
4ue8A           A.81.LEUGLU*A.80.TYR
3wgtA            A.307.HIS*A.290.ARG
3wgtA         A.279.TYR*A.277.GLYGLU
3wgtA         A.114.PHE*A.115.ARGLYS
3wgtA          A.94.GLYTYR*A.213.PHE
3wgtA          A.93.SERGLY*A.213.PHE
3wgtA             A.74.TYR*A.320.TRP
3wgtA         A.296.LEUARG*A.298.PHE
3wgtA         A.134.ASNTHR*A.133.PHE
3wgtA             A.162.ARG*A.35.TYR
3wgtA        A.61.ASNPRO*A.59.PROSER
3wgtA         A.150.GLUARG*A.151.ARG
3wgtA            A.146.GLN*A.142.ARG
3wgtA              A.23.TYR*A.22.ARG
3wgtA             A.98.PHE*A.217.HIS
3wgtA         A.311.HISGLY*A.314.TYR
3wgtA        A.29.PROLEU*A.27.LEUGLN
3wgtA          A.67.TRP*A.321.GLYCYS
3wgtA         A.107.TRP*A.105.PROTYR
3wgtA           A.28.GLN*A.28.GLNPRO
3wgtA         A.332.LYSVAL*A.293.ARG
3wgtA         A.209.TRP*A.207.ALAPRO
2ww2A         A.531.TRP*A.537.GLUGLY
2ww2A         A.328.GLNGLY*A.330.ASN
2ww2A      A.233.ALAASP*A.235.TYRTHR
2ww2A         A.506.TYR*A.512.PHEMET
2ww2A         A.357.ARG*A.606.GLNPRO
2ww2A         A.142.GLN*A.142.GLNTHR
2ww2A            A.576.ASN*A.578.TYR
2ww2A         A.473.ALATYR*A.549.HIS
2ww2A            A.542.HIS*A.605.ASN
2ww2A         A.623.LYSTHR*A.615.TYR
2ww2A      A.483.ALAGLU*A.488.LYSGLN
2ww2A         A.345.TYRMET*A.333.TYR
2ww2A      A.460.PROGLU*A.462.VALPRO
2ww2A         A.387.PHE*A.436.ARGHIS
2ww2A         A.334.TYR*A.335.SERPRO
2ww2A           A.83.ARG*A.67.GLYGLU
2ww2A            A.384.GLU*A.342.HIS
2ww2A        A.60.ASNPHE*A.58.GLYMET
2ww2A             A.27.GLU*A.289.ASN
2ww2A         A.751.ASP*A.718.THRARG
2ww2A           A.75.TYR*A.76.THRTYR
2ww2A         A.163.ASPGLN*A.165.TYR
2ww2A            A.525.ARG*C.523.ARG
2ww2A         A.601.TYR*A.602.ALAHIS
2ww2A             A.123.HIS*A.77.TYR
2ww2A         A.625.GLN*A.621.PROTRP
2ww2A              A.87.GLN*A.60.ASN
2ww2A      A.392.ALASER*A.394.PROGLY
2ww2A         A.260.SERPRO*A.204.TYR
2ww2A         A.533.GLYPRO*A.459.TYR
2ww2A         A.496.TYR*A.480.ALAARG
2ww2A            A.101.PHE*A.205.PHE
2ww2A         A.752.PHE*A.617.TYRILE
2ww2A             A.69.ASN*A.171.TYR
2ww2A         A.391.TRP*A.350.ASNGLY
2ww2A            A.448.PHE*A.449.GLU
2ww2A         A.120.PROPHE*A.138.ASN
2ww2A        A.26.VALGLU*A.24.LYSTHR
2ww2A            A.258.PHE*A.322.PHE
2ww2A         A.192.TYR*A.193.ASNASN
2ww2A      A.295.VALGLU*A.293.GLYARG
2ww2A            A.522.TRP*A.507.TYR
2ww2A        A.75.TYRTHR*A.73.TRPMET
2ww2A         A.239.TYR*A.216.TYRGLY
2ww2A         A.342.HISASP*A.333.TYR
2ww2A         A.622.TRP*A.620.GLNPRO
2ww2A         A.527.ASPALA*A.526.PHE
2ww2A         A.754.TYR*A.755.SERTYR
2ww2A            A.164.GLN*A.158.PHE
2ww2A           A.86.ARGGLN*A.62.TRP
2ww2A         A.714.GLYGLN*A.715.GLN
2ww2A            A.356.PHE*A.404.ASN
2ww2A            A.523.ARG*B.525.ARG
2ww2A             A.69.ASN*A.114.HIS
2ww2A            A.472.TYR*A.445.ARG
2ww2A         A.205.PHE*A.188.GLYALA
2ww2A         A.439.GLU*A.438.ALAGLU
2ww2A          A.57.TRP*A.316.LEULEU
2ww2A              A.98.TYR*A.89.HIS
2ww2A         A.507.TYRPRO*A.506.TYR
2ww2A         A.502.TYR*A.500.PROASN
2ww2A            A.418.GLN*A.413.TRP
2ww2A         A.205.PHE*A.187.LYSGLY
2ww2A          A.31.TYR*A.305.LEUARG
2ww2A         A.328.GLN*A.327.SERGLN
2ww2A         A.221.GLYASP*A.219.TYR
2ww2A         A.539.SERSER*A.535.PHE
2ww2A         A.740.VALPRO*A.706.TYR
2ww2A         A.748.GLNPRO*A.752.PHE
2ww2A          A.55.VALPRO*A.288.TRP
2ww2A         A.201.PHE*A.202.ALAASN
2ww2A         A.133.TYR*A.134.SERVAL
2ww2A         A.302.ASPGLU*A.306.ARG
2ww2A            A.526.PHE*A.510.HIS
2ww2A         A.731.GLYGLU*A.693.PHE
2ww2A         A.434.GLNALA*A.448.PHE
2ww2A         A.521.ASN*A.519.LYSGLY
2ww2A         A.506.TYR*A.511.GLYPHE
2ww2A             A.28.PHE*A.309.TYR
2ww2A         A.538.GLYSER*A.531.TRP
4l8jA         A.295.TYRVAL*A.286.PHE
4l8jA            A.297.TRP*A.286.PHE
4l8jA            A.306.ARG*A.295.TYR
4l8jA         A.312.TYR*A.313.SERPRO
4l8jA         A.272.PHE*A.270.ALAPRO
4l8jA            A.157.PHE*A.183.ASN
4l8jA             A.171.ARG*A.66.GLN
4l8jA         A.112.ARG*A.108.ALAGLN
4l8jA            A.169.TYR*A.168.ASN
4l8jA            A.293.ASN*A.291.ASN
4l8jA         A.260.THRCYS*A.213.ASP
4l8jA             A.180.ARG*A.56.TYR
3ayxA         A.345.GLN*A.342.GLUGLN
3ayxA         A.130.ASP*A.581.LEUARG
3ayxA         A.363.HIS*A.339.ARGASP
3ayxA         A.306.GLYALA*A.318.ASP
3ayxA      A.245.ASPGLY*D.188.LYSMET
3ayxA             A.74.ARG*A.230.HIS
3ayxA          A.397.TRP*A.52.METTRP
3ayxA          A.84.ALALEU*A.233.TYR
3ayxA            A.475.TYR*A.426.TYR
3ayxA        A.23.PROVAL*A.21.ILEASP
3ayxA          A.86.ALASER*A.528.HIS
3ayxA         A.415.ARG*A.411.GLYPRO
3ayxA      A.221.HISALA*A.227.LYSASN
3ayxA         A.367.GLYILE*A.541.GLN
3ayxA         A.450.LYSASP*A.449.HIS
3ayxA      A.461.SERTHR*A.294.GLYGLY
3ayxA      A.309.PROLYS*A.311.THRPRO
3ayxA         A.124.TYR*A.206.HISTYR
3ayxA            A.439.ASN*A.451.ASP
3ayxA      A.251.GLYALA*B.221.LYSGLY
3ayxA         A.119.HISILE*A.277.TYR
3ayxA         A.155.HISHIS*A.275.ASN
3ayxA         A.214.GLN*A.214.GLNLYS
3ayxA            A.232.ASN*B.256.HIS
3ayxA         A.505.ASPPRO*A.509.TRP
3ayxA            A.213.PHE*A.272.PHE
3ayxA         A.396.SERTRP*A.352.TRP
3ayxA         A.188.TRP*A.186.GLYTYR
3ayxA             A.397.TRP*A.53.TRP
3ayxA             A.261.PHE*D.35.HIS
3ayxA         A.415.ARG*A.520.ALAALA
3ayxA      A.510.PROGLU*A.512.HISALA
3ayxA            A.465.ARG*A.587.PHE
3ayxA         A.576.GLUPRO*A.187.TYR
3ayxA      A.357.ASPGLU*A.355.TYRPRO
3ayxA         A.127.HIS*A.585.HISSER
3ayxA         A.257.GLU*A.257.GLUARG
3ayxA           A.28.GLU*A.28.GLUGLY
3ayxA         A.307.ALATYR*A.318.ASP
3ayxA         A.562.PHE*A.549.ASNGLY
3ayxA      A.352.TRPTYR*A.372.ASNTYR
3ayxA         A.395.TYRSER*A.352.TRP
3ayxA      A.318.ASPGLN*A.320.LEUPRO
3ayxA             A.385.ASN*B.99.ARG
3ayxA           A.53.TRP*A.54.ARGGLY
1qreA         A.191.TYRSER*A.189.TYR
1qreA            A.189.TYR*A.166.TYR
1qreA          A.33.TYR*A.209.TYRLYS
1qreA            A.200.TYR*A.204.HIS
1qreA          A.122.HIS*A.81.HISALA
1qreA         A.138.PHE*A.139.VALPHE
1qreA           A.70.ASPARG*A.71.ARG
1qreA           A.33.TYR*A.34.ILEASP
1qreA         A.132.PHE*A.133.ILEGLY
1qreA              A.81.HIS*A.59.ARG
1qreA              A.19.TRP*A.84.GLU
1qreA             A.73.ASN*A.202.ASN
1qreA            A.146.ASN*A.163.ASP
1qreA         A.109.ILEGLY*A.108.TYR
1qreA         A.183.PROGLU*A.166.TYR
4jkzA          A.91.GLYTHR*A.173.ARG
4jkzA           A.85.ASP*A.77.PROLYS
4jkzA         A.145.ASPALA*A.140.ARG
4jkzA           A.30.GLYPHE*A.32.ASP
4jkzA          A.31.PHE*A.104.ALAMET
3b8oA          A.55.GLUTRP*A.319.ASP
3b8oA            A.283.TYR*A.279.PHE
3b8oA            A.313.GLU*H.116.ARG
3b8oA            A.105.PHE*A.306.TYR
3b8oA         A.146.ASNILE*A.148.GLN
3b8oA         A.309.LEUARG*H.113.ASP
3b8oA         A.108.GLN*A.186.ARGALA
3b8oA         A.173.ASN*A.313.GLUGLU
3b8oA            A.310.ARG*H.112.TRP
3b8oA            A.307.ARG*H.190.HIS
3b8oA         A.199.TRP*A.296.GLYPRO
3b8oA          A.56.TRP*A.317.LYSARG
3b8oA            A.190.HIS*B.307.ARG
3b8oA             A.73.TYR*A.303.PHE
3b8oA         A.149.PHE*A.150.ILEPRO
3b8oA            A.112.TRP*B.310.ARG
3b8oA            A.124.TYR*A.128.ARG
3b8oA         A.113.ASP*B.309.LEUARG
3b8oA          A.63.ASPARG*A.102.TYR
3b8oA          A.56.TRP*A.168.THRALA
3b8oA            A.104.GLU*A.190.HIS
3b8oA         A.212.ARG*A.208.ALAGLN
3b8oA         A.221.TYR*A.276.GLYPRO
4mf9A            A.233.TRP*A.202.TRP
4mf9A         A.147.HIS*A.148.LYSVAL
4mf9A            A.269.HIS*A.290.PHE
4mf9A      A.169.ALAALA*A.171.GLUGLN
4mf9A         A.303.TRP*A.226.LEUARG
4mf9A         A.291.ASNLEU*A.290.PHE
4mf9A          A.267.GLNILE*A.84.HIS
4mf9A             A.278.TRP*B.29.ARG
4mf9A           A.60.TRP*A.58.PROASP
4mf9A              A.15.TYR*A.19.GLN
4mf9A            A.351.PHE*B.130.ARG
4mf9A      A.332.GLYALA*A.256.ILEMET
4mf9A      A.308.PROSER*A.205.LEULYS
4mf9A              A.78.ARG*A.31.ARG
4mf9A         A.142.GLN*A.141.GLNGLN
4mf9A         A.344.TRP*A.331.PHEGLY
4mf9A         A.235.GLUARG*A.303.TRP
4mf9A          A.26.PROGLN*B.278.TRP
4mf9A          A.41.GLUGLY*A.139.PHE
4mf9A             A.29.ARG*B.278.TRP
4mf9A         A.197.ALALEU*A.218.HIS
4mf9A         A.269.HIS*A.270.THRGLY
3tduA         A.190.PHE*A.192.PHELEU
3tduA            A.230.TYR*A.236.TRP
3tduA            A.159.GLN*A.214.ASN
3tduA         A.231.ASPGLU*A.230.TYR
3tduA         A.164.PHE*A.113.THRGLN
3tduA         A.139.ALAGLN*A.140.GLN
3tduA            A.120.GLN*B.120.GLN
3tduA            A.110.ARG*B.110.ARG
3tduA            A.213.TRP*A.182.TRP
3tduA         A.234.GLYALA*C.727.HIS
3tduA            A.158.TYR*A.213.TRP
3tduA            A.154.PHE*A.189.ARG
4p56A         A.125.TYR*A.129.LEULEU
4p56A         A.170.ARG*A.171.VALGLY
4p56A         A.122.TRP*A.263.GLYARG
4p56A          A.92.HIS*A.238.HISALA
4p56A            A.139.ARG*A.247.PHE
4p56A           A.60.ARG*A.57.THRASP
4p56A         A.238.HISALA*A.144.TYR
4p56A         A.212.GLU*A.212.GLUSER
4p56A        A.61.VALTHR*A.59.GLYARG
4p56A         A.156.LYSPRO*A.225.HIS
4p56A         A.128.TYR*A.327.ALAALA
4p56A            A.340.ASP*A.112.ASP
4p56A            A.217.PHE*A.209.PHE
4p56A         A.305.GLU*A.305.GLUARG
4p56A         A.137.GLYVAL*A.244.ARG
4p56A              A.34.TRP*A.89.PHE
1dekA            A.136.GLN*A.206.HIS
1dekA             A.231.PHE*A.20.PHE
1dekA           A.30.TYR*A.31.GLNLEU
1dekA         A.222.THRASN*A.224.ASP
1dekA              A.71.ASN*A.73.ASN
1dekA           A.38.ASPALA*A.89.TYR
1dekA            A.100.PHE*A.111.ASN
1dekA           A.40.LEUALA*A.61.PHE
1dekA            A.165.ASN*A.164.PHE
1dekA           A.62.GLUGLY*A.68.ARG
1dekA          A.168.TYR*A.27.ALAVAL
1dekA           A.67.ASPARG*A.66.TYR
1o3uA             A.71.HIS*A.108.TYR
1o3uA           A.20.TYR*A.98.SERARG
1o3uA         A.33.LYSALA*A.0.HISMET
1o3uA           A.17.HISGLY*A.19.PHE
1o3uA           A.95.ASN*A.91.GLYSER
1o3uA           A.20.TYR*A.18.GLYPHE
1o3uA            A.114.ARG*A.110.GLU
3gehA           A.39.PHE*A.55.GLYTYR
3gehA            A.397.GLN*A.394.ASN
3gehA         A.186.LEUPRO*A.184.GLU
3gehA           A.40.ASPALA*A.39.PHE
3gehA         A.338.ASP*A.336.LYSILE
3gehA        A.63.ARGGLN*A.58.ARGHIS
3gehA         A.314.TRP*A.318.ASPGLN
3gehA              A.78.ARG*A.50.HIS
1wq8A        A.49.CYSTHR*A.51.ASPGLU
1wq8A        A.35.PHEARG*A.37.PROSER
1ylxA                A.6.ARG*B.6.ARG
1ylxA           A.85.LYSGLY*A.87.PHE
1ylxA              A.33.GLU*B.33.GLU
1ylxA           A.89.SERLEU*A.75.TRP
1ylxA           A.32.PHE*A.33.GLUGLU
1ylxA           A.40.ARGTYR*A.42.TYR
1ylxA           A.51.ASPGLU*B.82.ARG
1ylxA            A.3.PHEALA*A.67.GLU
4bg5A           A.87.ARG*A.87.ARGGLN
4bg5A              A.47.GLN*A.86.ARG
4bg5A           A.74.LYSMET*A.76.ASN
4bg5A          A.144.METASP*B.25.PHE
4bg5A          A.98.THRASP*A.102.ASN
4bg5A           A.90.TYR*A.86.ARGARG
4omvA          A.164.PHE*A.13.ASPILE
4omvA              A.63.TYR*A.51.ASN
4omvA          A.156.ASN*A.81.METPHE
4omvA         A.193.GLU*A.193.GLUPRO
1hwtC          C.98.GLN*C.102.GLUGLU
1hwtC              C.95.TYR*C.78.ARG
1ws6A             A.125.PHE*A.58.ARG
1ws6A           A.46.PHEASP*A.50.ARG
1ws6A         A.142.PHE*A.138.LEUALA
1ws6A           A.78.TRP*A.56.ARGGLY
1ws6A         A.134.TYR*A.161.HISPRO
1ws6A         A.167.LEUPRO*A.166.TYR
1ws6A         A.161.HIS*A.179.ALALEU
3qh9A           A.29.ARG*A.25.LEUGLN
3qh9A           A.71.GLU*A.67.ASPALA
1tzsA             A.123.PHE*A.64.HIS
1tzsA         A.214.GLYTHR*A.211.GLN
1tzsA           A.98.ASP*A.74.THRTYR
1tzsA           A.26.PHE*A.24.GLUTYR
1tzsA         A.255.GLYGLU*A.256.GLU
1tzsA         A.136.TYR*A.200.GLNALA
1tzsA           A.92.SERGLY*A.82.PHE
1tzsA            A.194.TRP*A.335.ARG
1tzsA            A.188.PHE*A.185.HIS
1tzsA            A.334.ASN*A.200.GLN
1tzsA            A.187.HIS*A.165.TYR
1tzsA            A.245.GLN*A.257.TYR
1tzsA          A.112.PHE*A.96.GLYALA
1tzsA         A.251.ALAPRO*A.257.TYR
1tzsA         A.319.ASPVAL*A.323.ARG
1tzsA         A.286.TYR*A.282.SERPRO
1tzsA         A.165.TYR*A.166.METSER
1tzsA           A.67.PHE*A.68.GLNPRO
1tzsA          A.127.GLUPHE*A.26.PHE
1tzsA              A.36.GLN*A.67.PHE
1tzsA         A.327.SERVAL*A.326.TYR
1tzsA           A.75.TYR*A.76.SERGLN
3hzjA            A.695.TYR*A.755.PHE
3hzjA         A.667.PHE*A.692.ALAHIS
3hzjA         A.793.TYR*A.664.HISCYS
3hzjA            A.521.HIS*C.521.HIS
3hzjA      A.612.VALTYR*A.614.ASPGLU
3hzjA         A.620.CYSGLN*A.619.TYR
3hzjA            A.691.GLU*B.691.GLU
3hzjA         A.660.PHEGLU*A.664.HIS
3hzjA            A.653.ARG*A.648.TYR
3hzjA         A.688.LEUASN*B.672.ARG
3hzjA            A.565.ARG*C.591.TYR
3hzjA         A.582.ILEHIS*A.600.GLN
3hzjA         A.672.ARGLEU*A.789.TYR
3hzjA         A.637.GLU*A.637.GLUGLN
1onwA             A.7.ALAGLY*A.9.PHE
1onwA      A.261.VALALA*A.258.ASPGLU
1onwA         A.201.HIS*A.202.METGLY
1onwA            A.137.TYR*A.201.HIS
1onwA        A.55.LEUSER*A.14.GLYALA
1onwA             A.83.ARG*A.111.ARG
1onwA            A.138.HIS*A.142.ARG
1onwA         A.355.ASP*A.353.ASPALA
1onwA              A.16.HIS*A.18.TYR
1onwA            A.156.ASP*B.156.ASP
1onwA         A.344.GLYLYS*A.352.ASN
1onwA         A.137.TYR*A.105.GLYTHR
1onwA         A.138.HIS*A.139.VALPRO
1onwA            A.157.ARG*A.131.TRP
1onwA         A.264.ALAGLU*A.321.TYR
1onwA          A.73.GLYGLY*A.111.ARG
1onwA         A.129.SERALA*A.131.TRP
2ywlA           A.22.ARG*B.44.PROASN
2ywlA         A.150.GLYHIS*A.151.HIS
2ywlA           A.60.ARG*A.60.ARGARG
2ywlA       A.159.GLYALA*A.15.SERALA
2ywlA       A.155.SERALA*A.11.PROSER
2ywlA         A.176.LYSASP*A.175.TYR
3lqsA      A.257.ARGASP*A.255.LEUILE
3lqsA            A.136.ASP*A.171.ARG
3lqsA            A.157.GLN*B.102.PHE
3lqsA            A.1.GLYTYR*A.12.ASP
3lqsA              A.22.ARG*A.26.PHE
3lqsA           A.89.PHEGLN*A.88.TYR
3lqsA             A.93.ARG*A.102.PHE
3lqsA            A.102.PHE*B.157.GLN
3lqsA           A.32.GLUVAL*A.89.PHE
3lqsA         A.134.VALGLU*A.170.HIS
4mo4A            A.112.ASN*B.130.ARG
4mo4A           A.33.HIS*A.34.TYRLEU
4mo4A           A.34.TYR*A.35.LEUPRO
4mo4A         A.145.ALAPHE*A.332.TRP
4mo4A           A.99.ARG*A.50.VALPRO
4mo4A         A.146.PHE*A.328.METALA
4mo4A            A.197.GLN*A.193.TRP
4mo4A         A.258.ALAALA*A.208.TRP
4mo4A         A.113.PROALA*A.361.TYR
4mo4A            A.130.ARG*B.112.ASN
4mo4A           A.99.ARG*A.49.CYSVAL
4mo4A         A.126.ALAASP*A.128.PHE
4mo4A           A.95.GLYGLN*A.66.TRP
4mo4A         A.248.GLU*A.248.GLUHIS
4mo4A         A.109.GLN*A.108.VALGLN
1njgA        A.81.GLUILE*A.86.ARGPHE
1njgA      A.226.ALASER*A.228.GLYASP
1njgA           A.28.LEUALA*A.15.PHE
1njgA      A.145.GLUPRO*A.143.LEUGLU
1njgA         A.223.GLN*A.219.SERLEU
1njgA          A.67.GLYILE*A.119.ARG
1njgA         A.172.GLNPHE*A.174.HIS
3fdjA             A.102.HIS*A.98.TYR
3fdjA         A.230.ASNGLU*A.227.HIS
3fdjA              A.31.GLU*A.33.PHE
3fdjA            A.261.TYR*A.161.ASN
3fdjA           A.56.TYR*A.54.ARGSER
3fdjA         A.180.GLYILE*A.200.ARG
3fdjA           A.90.SERALA*A.65.TRP
3fdjA             A.136.PHE*A.76.PHE
3fdjA           A.20.LYSALA*A.19.PHE
3fdjA         A.264.GLU*A.158.SERLEU
3fdjA         A.151.ARGLEU*A.118.GLN
3fdjA            A.264.GLU*A.161.ASN
3fdjA            A.125.GLN*A.146.TYR
3fdjA         A.253.TYR*A.225.ILECYS
3fdjA         A.103.PROGLN*A.104.GLN
1dl2A            A.352.GLU*A.364.PHE
1dl2A         A.159.TYR*A.144.ALATYR
1dl2A              A.68.HIS*A.56.HIS
1dl2A            A.386.TYR*A.455.TRP
1dl2A         A.126.ALAGLU*A.187.ASN
1dl2A          A.94.METTYR*A.105.PHE
1dl2A         A.495.ASN*A.496.METGLU
1dl2A         A.228.TRP*A.543.LEUTHR
1dl2A            A.403.PHE*A.319.TYR
1dl2A         A.446.LEUSER*A.448.HIS
1dl2A            A.278.TYR*A.270.PHE
1dl2A      A.227.TYRTRP*A.215.PHELYS
1dl2A            A.199.ASP*A.255.TYR
1dl2A      A.374.ASPTRP*A.346.LEUALA
1dl2A         A.480.THRSER*A.432.GLN
1dl2A         A.452.TYR*A.443.METTYR
1dl2A         A.174.PHE*A.230.LEUVAL
1dl2A           A.72.ASN*A.78.GLNPRO
1dl2A         A.235.TYRGLU*A.547.TRP
1dl2A         A.415.ARGSER*A.414.TRP
1dl2A         A.122.PHEASP*A.169.ARG
1dl2A            A.293.TYR*A.284.GLN
1dl2A            A.311.GLN*A.318.TRP
1dl2A           A.64.GLYPRO*A.63.TYR
1dl2A         A.275.ASP*A.271.GLYSER
1dl2A      A.293.TYRTYR*A.281.LEULEU
1dl2A         A.310.ALAGLN*A.319.TYR
1dl2A            A.263.PHE*A.242.ASN
2j05A         A.328.GLN*A.327.GLUGLN
2j05A         A.301.PHE*A.289.PROTYR
2j05A         A.291.THRLYS*A.290.TYR
2j05A         A.319.TRP*A.329.GLYLEU
2j05A         A.319.TRP*A.328.GLNGLY
2j05A         A.317.TRP*A.331.ILEVAL
4j6cA         A.375.PHETHR*A.271.ARG
4j6cA         A.125.TYR*A.156.ARGVAL
4j6cA             A.6.HIS*A.7.SERASP
4j6cA         A.135.ARG*A.131.ASPASP
4j6cA           A.71.GLN*A.67.TRPSER
4j6cA             A.352.HIS*A.52.ARG
4j6cA            A.287.TRP*A.325.ARG
4j6cA           A.21.GLYGLU*A.25.ARG
4j6cA            A.247.GLU*A.180.PHE
4j6cA           A.79.TRP*A.81.LEUILE
4j6cA             A.99.HIS*A.355.HIS
4j6cA         A.336.ASPPHE*A.287.TRP
4j6cA          A.78.GLNTRP*A.186.GLN
4j6cA         A.296.METARG*A.298.PHE
4j6cA         A.371.LEUPRO*A.277.TRP
4j6cA         A.286.ARG*A.286.ARGTRP
4j6cA         A.398.GLN*A.397.THRGLN
4j6cA        A.73.GLYTHR*A.75.VALTHR
4j6cA            A.171.GLN*A.175.TRP
4j6cA         A.268.ARG*A.268.ARGLEU
4j6cA         A.195.GLUMET*A.175.TRP
4j6cA         A.265.GLU*A.263.HISPRO
1eaiC           C.11.TRP*C.12.THRGLU
1eaiC               C.11.TRP*C.2.GLN
1eaiC            C.9.GLU*C.38.CYSGLU
1eaiC             C.44.ARG*A.148.ASN
1eaiC           C.36.PROSER*C.11.TRP
3nqoA           A.83.ASNGLY*A.85.TYR
3nqoA            A.126.HIS*A.183.ARG
3nqoA          A.15.GLNTHR*B.137.TRP
3nqoA          A.137.TRP*B.15.GLNTHR
3nqoA              A.43.TYR*A.35.PHE
4mu9A         A.288.ALAALA*A.335.TYR
4mu9A         A.295.PHE*A.257.TYRALA
4mu9A            A.259.TYR*A.315.PHE
4mu9A         A.229.TRP*A.183.GLYGLY
4mu9A         A.118.ASPGLY*A.117.TRP
4mu9A         A.348.ARG*A.344.LEUHIS
4mu9A         A.257.TYR*A.255.ASPLYS
4mu9A         A.190.GLN*A.189.GLUGLN
4mu9A            A.196.HIS*A.245.ASN
4mu9A         A.192.LYSGLU*A.186.PHE
4mu9A      A.268.GLYVAL*A.280.TYRLEU
4mu9A         A.219.TYR*A.210.LEUTYR
4mu9A      A.369.TYRLYS*A.367.GLUPRO
4mu9A            A.170.TYR*A.174.TYR
4mu9A            A.260.ASN*A.259.TYR
4mu9A            A.347.TRP*A.351.ARG
4mu9A           A.56.ASN*A.58.ASPGLN
4mu9A         A.280.TYR*A.271.LEUTYR
4mu9A      A.219.TYRLEU*A.207.GLYVAL
4mu9A         A.309.HIS*A.295.PHEARG
4mu9A         A.374.ASP*A.358.GLYARG
4mu9A         A.125.CYSTYR*A.117.TRP
4mu9A             A.369.TYR*A.56.ASN
4mu9A             A.364.HIS*B.98.ASP
4mu9A         A.177.TRP*A.184.GLYILE
4mu9A         A.266.GLN*A.321.ARGGLY
4mu9A            A.121.ARG*A.135.GLN
4mu9A         A.350.TYR*A.362.SERGLY
4mu9A         A.235.CYSASP*A.243.TRP
4mu9A         A.124.ALACYS*A.117.TRP
4i1oB            B.455.TYR*B.459.HIS
4i1oB         B.419.PHE*B.420.VALPRO
4i1oB            B.448.PHE*B.419.PHE
4i1oB            B.417.HIS*B.596.ARG
4i1oB            B.577.ASN*B.580.PHE
4i1oB         B.454.LEUTYR*B.406.TYR
4i1oB          B.415.HISGLY*C.37.TYR
4i1oB         B.337.THRSER*B.373.GLN
4i1oB         B.401.ASN*B.421.PROTYR
4i1oB            B.611.HIS*B.581.TRP
4i1oB         B.572.GLU*B.572.GLUARG
4i1oB            B.407.ASP*B.419.PHE
3uwtA         A.181.GLUALA*A.229.TYR
3uwtA         A.132.TYR*A.133.VALGLY
3uwtA            A.291.ASP*A.296.TYR
3uwtA         A.182.ALAALA*A.177.TYR
3uwtA         A.274.TYR*A.279.SERSER
3uwtA         A.152.PHE*A.185.LEUALA
3uwtA         A.223.ARG*A.219.ALAGLU
3uwtA         A.291.ASPLEU*A.290.PHE
3uwtA         A.135.SERILE*A.198.ARG
3uwtA         A.230.VALALA*A.229.TYR
3uwtA            A.227.ARG*A.271.PHE
3uwtA         A.146.ARG*A.146.ARGGLN
3uwtA         A.226.ASN*A.276.LYSALA
3uwtA         A.305.PROPRO*A.227.ARG
3uwtA         A.249.PHE*A.282.ASPALA
1otfA           A.40.ARG*A.38.ARGVAL
1otfA                A.5.GLN*A.7.TYR
1otfA           A.52.GLYILE*A.51.PHE
4cbpA          A.48.GLYALA*A.143.TYR
4cbpA         A.218.LYSCYS*A.182.TRP
4cbpA             A.95.ARG*B.233.PHE
4cbpA         A.233.PHE*A.234.VALTYR
4cbpA           A.99.SERHIS*A.67.TRP
4cbpA             A.26.ARG*B.211.TRP
4cbpA            A.171.ARG*A.201.ASN
4cbpA           A.32.TRP*A.59.GLYSER
4cbpA         A.103.ASPHIS*A.143.TYR
4cbpA         A.101.ILEILE*A.100.HIS
2yzcA          A.58.ALAGLY*D.224.GLN
2yzcA            A.266.ASN*A.179.ASP
2yzcA          A.23.ALAGLU*D.276.TYR
2yzcA         A.148.ALAGLY*A.190.TRP
2yzcA         A.170.LYSTYR*G.258.GLN
2yzcA             A.117.ARG*A.36.ARG
2yzcA          A.276.TYR*D.23.ALAGLU
2yzcA         A.106.GLYARG*A.108.TRP
2yzcA         A.258.GLN*G.170.LYSTYR
2yzcA          A.92.LEUGLY*A.108.TRP
2yzcA           A.52.PHE*A.50.GLYASP
2yzcA         A.239.GLUILE*A.193.ASN
2yzcA              A.88.PHE*A.82.PHE
2yzcA             A.86.GLU*A.199.PHE
2yzcA              A.82.PHE*A.40.GLN
2yzcA              A.91.ARG*A.77.PHE
2yzcA         A.125.PHE*A.123.HISALA
2yzcA         A.271.ALAALA*A.270.TYR
2yzcA          A.224.GLN*D.58.ALAGLY
2yzcA          A.106.GLYARG*A.49.ARG
2yzcA             A.63.HIS*A.102.TRP
3of4A          A.199.GLN*B.91.PROTYR
3of4A      A.203.ARGPHE*A.205.LYSVAL
3of4A            A.194.GLN*B.100.ARG
3of4A           A.71.ASP*A.67.GLNLYS
3of4A           A.10.ARG*A.10.ARGTYR
3of4A           A.12.ALATHR*A.11.TYR
3of4A          A.45.TYR*A.133.GLNALA
3of4A         A.116.GLN*A.116.GLNLYS
3of4A            A.7.GLN*B.35.LEUTHR
3of4A      A.139.GLYTHR*B.139.GLYTHR
3of4A           A.21.ILETHR*A.20.HIS
3of4A            A.35.LEUTHR*B.7.GLN
3of4A            A.100.ARG*B.194.GLN
3h2yA            A.260.PHE*A.280.PHE
3h2yA         A.280.PHE*A.340.GLYTRP
3h2yA            A.124.TYR*A.128.GLN
3h2yA            A.279.HIS*A.341.TRP
3h2yA         A.143.LYSGLY*A.179.ARG
3h2yA           A.91.HIS*A.89.GLYLEU
3h2yA           A.87.LEUPRO*A.86.TRP
3h2yA         A.193.THRTHR*A.206.ASP
3h2yA         A.348.GLYALA*A.274.ARG
3h2yA              A.56.ASP*A.59.PHE
1ji0A         A.220.GLYLYS*A.207.TYR
1ji0A         A.117.ASP*A.113.GLYILE
1ji0A           A.22.LYSGLY*A.12.HIS
1ji0A         A.178.PHE*A.200.GLYALA
1ji0A              A.14.TYR*A.19.HIS
1ji0A          A.4.ILEVAL*A.2.SERASP
3e7rL             L.5.ASN*L.3.GLYCYS
3e7rL            L.35.PHE*L.5.ASNGLY
3e7rL               L.18.HIS*L.2.PHE
3e7rL            L.14.GLN*L.2.PHEGLY
3e7rL           L.40.TYR*L.27.GLYGLY
3u0aA         A.124.PROPRO*A.171.TRP
3u0aA         A.101.SERMET*A.100.PHE
3u0aA           A.33.PHE*A.67.ASPALA
3u0aA            A.225.ARG*A.116.GLN
3u0aA              A.61.TYR*B.59.HIS
3u0aA           A.40.GLNSER*A.74.PHE
3u0aA      A.244.GLYGLY*B.110.GLNASN
3u0aA         A.115.HIS*B.241.SERALA
3u0aA      A.245.GLYARG*A.270.THRARG
3u0aA              A.89.ARG*B.89.ARG
3u0aA          A.105.SERPHE*A.56.HIS
3u0aA            A.232.TRP*A.173.ARG
3u0aA         A.222.TRP*A.220.ALAMET
3u0aA         A.272.TYR*B.112.GLYILE
3u0aA         A.241.SERALA*B.115.HIS
3u0aA         A.251.GLYLYS*A.250.HIS
3u0aA      A.110.GLNASN*B.244.GLYGLY
3u0aA         A.223.PHE*A.221.METTRP
3u0aA         A.112.GLYILE*B.272.TYR
3s4eA         A.192.GLYPHE*A.196.GLN
3s4eA         A.197.LEUARG*A.173.PHE
3s4eA         A.194.METGLU*A.198.ARG
3s4eA            A.200.TYR*A.201.GLN
2aotA         A.219.ASPLEU*A.218.TYR
2aotA            A.124.GLN*A.157.PHE
2aotA             A.35.PHE*A.287.PHE
2aotA             A.22.PHE*A.243.PHE
2aotA           A.94.GLN*A.62.GLYALA
2aotA            A.198.TYR*A.183.TRP
2aotA         A.122.GLUTYR*A.118.GLU
2aotA           A.98.TYR*A.63.ALAGLY
2aotA            A.259.ARG*A.241.TRP
2aotA         A.115.TRP*A.113.PHEALA
2vm9A           A.48.GLYSER*A.46.PHE
2vm9A           A.150.GLU*A.9.SERCYS
2vm9A          A.114.ASN*A.79.GLNGLY
2vm9A         A.173.ASPARG*A.174.ARG
2vm9A              A.47.ASP*A.39.ASN
2vm9A          A.117.ARG*A.83.ASPHIS
2vm9A             A.148.ARG*A.79.GLN
2vm9A              A.32.ASN*A.37.PHE
2vm9A            A.244.TYR*A.174.ARG
2vm9A        A.23.ASPTYR*A.54.SERSER
2vm9A      A.125.PHEASN*A.127.PROPRO
2vm9A           A.52.TRP*A.53.SERSER
2vm9A         A.189.VALLYS*A.188.HIS
2vm9A        A.32.ASNSER*A.51.SERTRP
2vm9A         A.144.HISILE*A.141.TYR
2vm9A      A.191.PHEPRO*A.193.VALGLU
2vm9A         A.250.TYR*A.167.GLYGLU
2vm9A         A.235.PHE*A.170.SERILE
2vm9A         A.250.TYR*A.166.VALGLY
2vm9A          A.115.LYSASP*A.87.TRP
2vm9A         A.150.GLULEU*A.152.TYR
2vm9A          A.102.TRP*A.95.TYRTHR
2vm9A           A.62.PHEILE*A.52.TRP
2vm9A         A.183.ARG*A.179.GLYTHR
2vm9A           A.38.SERASN*A.37.PHE
3i53A         A.211.ARG*A.181.GLYGLY
3i53A      A.191.HISGLU*A.189.THRALA
3i53A      A.296.GLYLYS*A.290.METLEU
3i53A          A.119.THRGLY*B.51.HIS
3i53A            A.294.PHE*A.247.ASP
3i53A         A.230.ASPPRO*A.259.ARG
3i53A            A.128.TYR*A.105.ARG
3i53A            A.124.TYR*A.128.TYR
3i53A             A.5.ALAALA*A.7.HIS
3i53A         A.195.SERGLY*A.172.HIS
3i53A              A.11.ARG*B.96.TRP
3i53A          A.110.PHE*B.16.LEUALA
3i53A          A.16.LEUALA*B.110.PHE
3i53A         A.172.HIS*A.173.VALVAL
3i53A         A.293.TYR*A.106.GLYASP
3i53A              A.96.TRP*B.11.ARG
3i53A           A.94.ARG*A.94.ARGLYS
3i53A          A.51.HIS*B.119.THRGLY
2f51A           A.40.ARG*A.36.GLYPRO
2f51A           A.48.ILEALA*A.57.PHE
2f51A             A.103.ARG*A.96.PHE
2f51A             A.8.PHE*A.9.ASNGLY
2f51A           A.31.PHE*A.60.VALASP
2fd6U               U.9.ASN*A.87.HIS
2fd6U           U.42.GLULYS*U.25.ARG
2fd6U          U.191.GLYARG*H.58.GLU
2fd6U         U.272.ASN*U.222.CYSLEU
2fd6U         U.273.HISPRO*U.239.ARG
2fd6U            U.189.GLN*U.216.ARG
2fd6U               U.15.GLU*U.5.GLN
2fd6U           U.45.CYSTHR*U.21.GLN
2fd6U         U.209.GLU*U.204.GLYCYS
2fd6U         U.159.PHE*U.160.HISASN
2fd6U         U.192.ARG*U.267.THRLYS
2fd6U           U.43.LYSSER*U.25.ARG
2fd6U         U.167.PHELEU*U.166.HIS
2fd6U         U.110.HIS*U.108.GLYARG
2o7aA              A.96.ARG*A.88.TYR
2o7aA         A.158.TRP*A.171.METASP
2o7aA            A.145.ARG*A.105.GLN
2o7aA          A.155.THRGLY*A.95.ARG
2o7aA         A.141.GLN*A.137.ARGTRP
2o7aA          A.122.GLN*A.86.PROVAL
2o7aA           A.76.ARG*A.72.ASPALA
2o7aA             A.126.TRP*A.95.ARG
2o7aA         A.144.ASNARG*A.148.ARG
2o7aA         A.124.LYSARG*A.126.TRP
2zmfA         A.309.GLU*A.312.GLYLYS
2zmfA         A.352.PHE*A.353.ASNARG
2zmfA            A.386.ASN*A.365.ARG
2zmfA         A.300.TYR*A.291.GLNVAL
2zmfA         A.386.ASNLYS*A.393.PHE
2zmfA         A.363.THRTHR*A.362.TYR
2zmfA         A.306.ILEGLY*A.286.ARG
2zmfA            A.252.PHE*A.277.TYR
2zmfA            A.362.TYR*A.286.ARG
3lqcA          A.60.ILEGLY*A.146.PHE
3lqcA            A.146.PHE*A.148.ARG
3lqcA         A.133.SERGLN*A.142.PHE
3lqcA          A.34.ARG*A.141.PROPHE
3lqcA            A.33.TRP*A.7.ARGHIS
3lqcA           A.72.VALGLY*A.84.TYR
3lqcA          A.96.PROSER*A.100.ARG
3lqcA         A.125.TRP*A.123.LYSARG
3lqcA               A.33.TRP*A.8.HIS
3lqcA             A.7.ARG*A.3.GLUILE
3zzyA         A.190.ASNLEU*A.192.PHE
3zzyA         A.267.TYR*A.283.GLYASP
3zzyA      A.269.ASNASP*B.205.SERLYS
3zzyA         A.223.GLNALA*A.216.PHE
3zzyA         A.233.SERALA*A.228.TYR
3zzyA            A.275.TYR*A.201.HIS
3zzyA         A.248.ASN*C.502.GLYALA
2yx6A            A.9.ASPASP*A.26.TYR
2yx6A         A.110.ASP*A.112.ASPTRP
2yx6A              A.62.HIS*A.29.PHE
1wz3A           A.87.TYR*B.17.ARGALA
1wz3A           A.93.TRP*B.20.GLYGLY
1wz3A           A.57.TYR*B.86.ASNTYR
1wz3A           A.86.ASNTYR*B.57.TYR
1wz3A           A.47.ARG*A.43.ASPPHE
1wz3A              A.48.GLN*A.44.PHE
1wz3A           A.17.ARGALA*B.87.TYR
2zycA         A.194.ARG*A.199.THRPRO
2zycA         A.297.GLYASN*A.301.ARG
2zycA         A.245.GLNALA*A.240.TYR
2zycA         A.156.PHE*A.188.TRPGLY
2zycA         A.260.TYR*A.279.GLYGLY
2zycA            A.250.TYR*A.205.PHE
2zycA         A.241.ASPSER*A.202.TYR
2zycA         A.247.PHE*A.163.GLNALA
3dmoA              A.48.TYR*C.48.TYR
3dmoA              A.60.PHE*B.52.ASN
3dmoA        A.48.TYRGLY*C.48.TYRGLY
3dmoA        A.89.GLYALA*D.89.GLYALA
3dmoA              A.52.ASN*B.60.PHE
3dmoA         A.111.GLNGLY*A.113.ASP
3dmoA        A.45.ASNALA*A.47.SERTYR
3dmoA         A.127.PHE*A.128.TYRLEU
3dmoA           A.45.ASNALA*A.21.TYR
4jguA         A.828.HIS*A.829.VALTYR
4jguA         A.814.PHEGLY*A.816.ASP
4jguA            A.836.TYR*A.830.TYR
4jguA         A.780.TYR*A.799.GLYTHR
4jguA            A.814.PHE*A.828.HIS
4fuvA           A.28.THRGLY*A.72.ASN
4fuvA           A.49.ASNGLY*A.48.TYR
4fuvA         A.127.PHEILE*A.120.PHE
4fuvA           A.93.GLN*A.93.GLNGLY
4fuvA         A.192.GLN*A.196.GLUALA
4fuvA           A.47.GLYTYR*A.76.TYR
4fuvA          A.153.GLYPHE*A.96.TYR
4fuvA         A.103.TYR*A.104.LEUASP
4fuvA         A.123.ASN*A.200.ALAGLU
4fuvA              A.96.TYR*A.80.GLU
4fuvA          A.19.VALGLY*A.225.TRP
4fuvA         A.149.TYR*A.150.LEUGLY
4fuvA         A.125.GLN*A.190.GLYASP
4fuvA         A.165.PHE*A.219.VALGLY
4fuvA         A.124.ASNGLN*A.121.ARG
4fuvA         A.175.ASN*A.206.ALAASN
4fuvA          A.118.ARG*A.62.ASNGLY
1tg7A            A.724.TYR*A.703.HIS
1tg7A      A.297.LEUVAL*A.299.GLUPHE
1tg7A            A.333.PHE*A.396.TYR
1tg7A            A.236.ASN*A.196.GLN
1tg7A         A.748.VALGLN*A.747.PHE
1tg7A         A.516.HISGLU*A.549.TRP
1tg7A         A.693.TYR*A.694.ASPASP
1tg7A         A.486.ASN*A.487.ILELEU
1tg7A      A.859.GLYGLY*A.841.GLYASN
1tg7A         A.624.PHE*A.622.ALAASP
1tg7A            A.343.TYR*A.299.GLU
1tg7A         A.766.TYR*A.767.VALGLY
1tg7A             A.96.TYR*A.134.ARG
1tg7A         A.151.TRP*A.149.PROGLY
1tg7A      A.369.ILESER*A.367.SERALA
1tg7A         A.211.PHE*A.203.GLYALA
1tg7A         A.854.GLYPRO*A.848.TYR
1tg7A         A.150.GLYTRP*A.727.HIS
1tg7A       A.1004.TYR*A.1005.GLNALA
1tg7A           A.43.GLN*A.43.GLNLYS
1tg7A         A.289.GLN*A.241.ALAGLY
1tg7A            A.130.TYR*A.590.TYR
1tg7A         A.121.PHE*A.117.LEUGLN
1tg7A            A.305.PHE*A.142.GLU
1tg7A            A.981.PHE*A.915.PHE
1tg7A             A.99.TRP*A.173.TYR
1tg7A         A.864.GLU*A.859.GLYGLY
1tg7A         A.895.TYR*A.882.SERPRO
1tg7A            A.915.PHE*A.939.TYR
1tg7A            A.953.GLU*A.958.TYR
1tg7A            A.830.GLN*A.740.ASN
1tg7A      A.888.THRLYS*A.974.ASNGLY
1tg7A         A.666.THRALA*A.665.TYR
1tg7A            A.705.TYR*A.703.HIS
1tg7A            A.471.ARG*A.441.GLN
1tg7A            A.223.HIS*A.219.TYR
1tg7A           A.1011.TYR*A.698.TRP
1tg7A         A.620.ILEGLN*A.621.GLN
1tg7A      A.355.GLYHIS*A.143.VALSER
1tg7A         A.926.ARG*A.756.TYRGLY
1tg7A         A.303.GLYALA*A.365.TYR
1tg7A         A.160.ARGTHR*A.216.TYR
1tg7A         A.794.TYRVAL*A.737.PHE
1tg7A         A.356.HIS*A.142.GLUVAL
1tg7A             A.71.ARG*A.363.TYR
1tg7A         A.766.TYR*A.768.GLYSER
1tg7A         A.347.GLYGLY*A.346.PHE
1tg7A           A.70.TYR*A.68.HISPRO
1tg7A            A.946.GLN*A.949.PHE
1tg7A         A.865.ARG*A.861.LEUTYR
1tg7A            A.378.GLU*A.322.HIS
1tg7A           A.94.SERPHE*A.66.GLU
1tg7A            A.160.ARG*A.138.TYR
1tg7A            A.233.PHE*A.225.ARG
1tg7A         A.820.ARG*A.752.GLYGLY
1tg7A         A.781.ALATHR*A.783.TYR
1tg7A      A.437.ASPTYR*A.435.HISSER
1tg7A         A.176.ASNILE*A.109.TYR
1tg7A        A.70.TYRARG*A.72.LEUPRO
1tg7A         A.727.HIS*A.725.GLYTYR
1tg7A         A.257.GLYHIS*A.256.TYR
1tg7A         A.633.VALGLY*A.500.PHE
1tg7A         A.211.PHE*A.202.SERGLY
1tg7A      A.115.PHEASP*A.111.ALAGLU
1tg7A         A.498.LYSLYS*A.500.PHE
1tg7A              A.90.PHE*A.63.PHE
1tg7A            A.770.TRP*A.779.ASN
1tg7A            A.807.GLU*A.140.ASN
1tg7A            A.265.PHE*A.305.PHE
1tg7A         A.747.PHEVAL*A.746.PHE
1tg7A         A.138.TYR*A.808.ASPTRP
1tg7A         A.625.ASNALA*A.665.TYR
1tg7A          A.123.ALAALA*A.82.PHE
1tg7A         A.937.GLYLYS*A.935.GLN
1tg7A         A.109.TYRSER*A.108.HIS
1tg7A         A.693.TYR*A.687.PROGLU
1tg7A      A.103.GLUGLY*A.105.ASNPRO
1tg7A         A.489.TYR*A.518.PHEALA
1tg7A            A.471.ARG*A.273.TRP
1tg7A         A.142.GLU*A.141.ALAGLU
1tg7A         A.241.ALAGLY*A.243.HIS
1tg7A         A.304.ALAPHE*A.365.TYR
1tg7A         A.893.ARG*A.683.VALASP
1tg7A        A.1003.LYSTYR*A.870.GLN
1jy2N           N.63.GLN*N.63.GLNASP
1jy2N              N.62.ASP*O.96.GLN
4nn3A            A.183.PHE*A.171.PHE
4nn3A         A.223.TYR*A.221.LYSPHE
4nn3A         A.125.GLN*A.124.ARGGLN
4nn3A            A.248.TRP*A.256.GLN
4nn3A            A.154.PHE*A.234.HIS
4nn3A            A.117.ARG*A.151.ARG
4nn3A         A.210.GLU*A.210.GLUGLU
4nn3A         A.172.ARG*A.173.VALMET
4nn3A              A.74.ASN*A.77.GLN
4nn3A              A.43.ARG*A.37.GLU
4nn3A         A.156.SERASN*A.226.GLN
4nn3A            A.219.ARG*A.218.GLN
4nn3A         A.158.LYSPRO*A.228.TYR
2heuA         A.173.ASPALA*A.175.TRP
2heuA         A.194.GLU*A.190.GLYGLY
2heuA         A.289.VALGLY*A.361.TRP
2heuA           A.12.PHE*A.13.GLNGLY
2heuA         A.116.ASNGLU*A.117.GLU
2heuA         A.382.THRGLY*A.225.ARG
2heuA         A.259.TRP*A.257.GLYSER
2heuA            A.217.ASP*A.185.PHE
2heuA         A.244.GLYALA*A.248.ARG
2heuA         A.371.ASPPHE*A.395.PHE
2heuA            A.365.TYR*A.364.GLN
2heuA         A.332.THRALA*A.354.PHE
2heuA         A.129.TYR*A.179.GLYTYR
2heuA            A.235.GLU*A.234.TRP
2heuA         A.199.LEUARG*A.396.PHE
2heuA            A.134.ASN*A.271.PHE
2heuA         A.290.GLYALA*A.361.TRP
2heuA         A.250.ASP*A.248.ARGGLY
2heuA        A.72.PROASP*A.74.VALVAL
2heuA         A.121.ASN*A.296.TRPSER
2heuA         A.280.GLYLYS*A.149.TRP
2heuA            A.357.ARG*A.352.TYR
2heuA            A.390.ASN*C.248.ARG
2heuA           A.39.ARG*A.35.GLUGLU
2heuA         A.366.TRP*A.362.LEUGLN
2heuA         A.313.GLU*A.313.GLUTYR
2heuA         A.357.ARG*A.284.GLYGLN
2heuA           A.23.TYR*A.24.PHEASN
2heuA         A.373.HIS*A.369.GLUALA
2heuA         A.129.TYR*A.256.ASNGLY
1t0fC             C.551.PHE*A.73.GLU
1t0fC            C.525.TYR*C.528.ARG
1t0fC      C.542.GLYVAL*C.544.ILEVAL
1t0fC            C.520.ASP*A.147.GLU
3ejaA         A.206.PHE*A.207.SERCYS
3ejaA           A.136.ALAGLU*A.4.TRP
3ejaA           A.90.GLYASP*A.37.ARG
3ejaA           A.78.ARGVAL*A.88.TRP
3ejaA            A.135.ARG*A.175.PHE
3ejaA         A.138.GLN*A.139.ILEGLY
3ejaA          A.70.GLYPRO*A.111.TRP
3ejaA      A.127.ILELYS*A.165.GLYSER
3ejaA       A.93.ALAVAL*A.172.LYSVAL
3ejaA             A.68.HIS*A.142.HIS
3ejaA          A.91.ASPGLY*C.145.GLN
3ejaA      A.106.GLYALA*A.108.GLNLEU
3ejaA              A.153.TYR*A.2.TYR
3ejaA         A.198.TYR*A.199.GLNASN
3ejaA          A.99.TYR*A.100.GLUASP
3ejaA        A.40.GLNALA*A.42.THRPRO
3ejaA      A.176.PROGLY*A.174.ALAPHE
3ejaA      A.191.TYRTYR*A.193.PROVAL
3ejaA             A.151.GLN*A.27.TYR
3ejaA              A.23.GLN*A.22.TRP
3ejaA           A.95.TRP*A.76.METALA
3ejaA               A.61.TRP*A.6.ARG
3ejaA           A.96.PHE*A.76.METALA
3ejaA         A.105.PHE*A.196.THRSER
3ejaA              A.39.PHE*A.21.ASN
3ejaA            A.100.GLU*A.200.ASN
3e1tA            A.170.ASN*A.283.ARG
3e1tA           A.31.HIS*A.29.ARGGLY
3e1tA              A.90.TRP*A.81.PHE
3e1tA         A.176.GLN*A.174.VALSER
3e1tA         A.307.PHE*A.308.VALASP
3e1tA             A.83.TRP*A.365.PHE
3e1tA            A.380.ARG*A.376.PHE
3e1tA          A.78.GLYGLY*A.209.ASN
3e1tA         A.217.ASPGLY*A.215.PHE
3e1tA         A.157.LEUMET*A.149.TYR
3e1tA           A.78.GLYGLY*A.92.PHE
3e1tA             A.44.HIS*A.281.ARG
3e1tA         A.474.HIS*A.478.PHEGLY
3e1tA           A.82.ARG*A.82.ARGTRP
3e1tA            A.32.ARG*A.8.PHEASP
3e1tA           A.77.ARGGLY*A.94.PHE
3e1tA           A.71.ALAGLY*A.73.PHE
3e1tA          A.41.PHEPRO*A.115.ASP
3e1tA           A.45.GLNILE*A.44.HIS
3e1tA            A.293.PHE*A.352.ARG
3e1tA         A.376.PHE*A.217.ASPGLY
3e1tA         A.129.ARGGLU*A.132.HIS
3e1tA         A.344.PHEGLU*A.294.TRP
3e1tA         A.233.GLYALA*A.221.TRP
3e1tA         A.193.TYR*A.281.ARGILE
3e1tA      A.169.GLYASN*A.303.ASPALA
3e1tA            A.288.TYR*A.181.ARG
3e1tA         A.189.ASN*A.187.PHEGLN
4rwhA           A.94.HIS*A.95.LEUALA
4rwhA              A.52.TYR*A.51.GLU
4rwhA           A.58.TYR*A.59.ASPASN
4rwhA           A.31.TRP*A.79.SERCYS
3vbaA              A.38.PHE*A.26.TYR
3vbaA          A.4.ILEILE*A.2.ARGSER
4pzkA          A.151.GLN*A.94.LYSARG
4pzkA            A.149.ARG*B.149.ARG
4pzkA          A.105.ARGGLU*A.11.GLU
4pzkA         A.159.GLUILE*B.124.ARG
4pzkA             A.135.ASN*B.18.ASN
4pzkA             A.118.ASN*A.78.TYR
4pzkA                A.8.TYR*A.9.GLN
4pzkA         A.148.PHEARG*A.153.TYR
4pzkA              A.4.HIS*A.100.TYR
4pzkA              A.71.ASN*A.67.PHE
4pzkA           A.92.TYR*A.90.PHEASP
4pzkA           A.99.TYR*A.92.TYRSER
4pzkA             A.159.GLU*B.84.GLU
4pzkA             A.100.TYR*A.76.PHE
4pzkA             A.18.ASN*B.135.ASN
3dh0A         A.111.PHE*A.112.METALA
3dh0A         A.143.ASPTRP*A.186.PHE
3dh0A            A.161.GLU*A.162.TRP
3dh0A         A.154.PROPRO*A.156.GLU
3dh0A            A.189.TYR*A.177.ARG
3go9A           A.44.TRP*A.36.GLYLYS
3go9A         A.303.ARG*A.299.SERASP
3go9A         A.284.TRP*A.285.HISPRO
3go9A            A.354.PHE*A.319.GLN
3go9A          A.393.THRASP*A.52.ARG
3go9A         A.334.ARG*A.257.ALAPRO
3go9A            A.308.TRP*A.312.GLN
3go9A           A.46.LEULEU*A.33.TRP
3go9A         A.443.SERGLN*A.444.GLN
3go9A         A.372.PHE*A.430.THRLEU
3go9A             A.33.TRP*A.402.ARG
3go9A         A.307.PHE*A.325.GLYPHE
3go9A          A.127.LEUPRO*A.56.ARG
3go9A             A.42.PHE*A.240.PHE
3go9A       A.65.THRGLY*A.119.ASPPHE
3go9A         A.334.ARG*A.282.THRPRO
3go9A           A.44.TRP*A.35.GLNGLY
3go9A              A.71.ASN*A.74.GLU
3go9A            A.213.TRP*A.212.GLN
1l0qA            A.340.PHE*A.353.HIS
1l0qA         A.354.THRTYR*A.353.HIS
1l0qA            A.355.TYR*A.361.TYR
1l0qA         A.334.THRGLU*A.336.TRP
1l0qA           A.53.SERASN*A.55.ASP
1l0qA              A.52.HIS*A.33.ASN
1l0qA         A.340.PHEGLY*A.342.ASP
1l0qA           A.13.ASN*A.11.SERASP
2nycA         A.240.ASPVAL*A.236.TYR
2nycA         A.295.PHE*A.272.TYRTHR
2becB            B.526.PHE*A.123.TYR
2becB         B.520.GLUGLU*B.516.ARG
2hmaA               A.31.TYR*A.4.ASN
2hmaA           A.37.PHE*A.55.ASPTYR
2hmaA            A.338.ARG*A.278.PHE
2hmaA           A.92.ARG*A.88.LEUALA
2hmaA         A.221.ARG*A.231.GLYGLU
2hmaA         A.261.PHE*A.277.GLYPHE
2hmaA            A.371.GLN*A.266.ASP
2hmaA            A.209.ASN*A.206.ASN
2hmaA      A.300.PROGLU*A.302.GLUPHE
2hmaA         A.333.PHE*A.286.THRSER
2hmaA           A.41.TRP*A.42.ASPASP
2hmaA         A.233.HIS*A.220.GLYARG
2hmaA         A.370.CYSGLN*A.372.TYR
2hmaA         A.154.TYR*A.312.ARGTYR
2hmaA            A.260.TRP*A.276.GLN
2hmaA            A.349.TYR*A.144.ARG
2c0rA            A.192.TYR*A.173.ASP
2c0rA           A.48.GLU*A.43.ARGGLY
2c0rA           A.27.PHE*B.23.ALAGLN
2c0rA          A.81.PHE*A.106.LYSALA
2c0rA         A.152.GLU*A.101.GLYSER
2c0rA            A.258.ARG*A.254.TRP
2c0rA         A.212.ASP*A.210.ARGGLU
2c0rA         A.118.HIS*A.119.VALALA
2c0rA          A.67.GLYTYR*A.211.GLU
2c0rA              A.30.TYR*A.31.GLN
2c0rA         A.339.TYR*A.197.LYSASN
2c0rA            A.295.ARG*A.276.TYR
2c0rA         A.334.LEUARG*A.302.PHE
2c0rA         A.339.TYR*A.337.SERILE
2c0rA         A.123.SERGLU*A.128.TYR
2c0rA          A.68.TYRLYS*A.211.GLU
2c0rA      A.284.GLYPHE*A.286.TYRARG
2c0rA         A.128.TYR*A.100.THRGLY
2c0rA           A.22.ARG*A.18.GLUVAL
2c0rA        A.12.PROALA*B.40.METSER
2c0rA      A.216.GLUSER*A.214.VALALA
2c0rA        A.40.METSER*B.12.PROALA
2c0rA          A.97.TYR*A.107.ALALEU
2c0rA          A.93.GLNTHR*A.142.ASN
1dtdB           B.40.ALAPRO*B.42.TRP
1dtdB           B.40.ALAPRO*B.44.ARG
1m5wA           A.98.ARG*A.97.LYSARG
1m5wA         A.102.THRTHR*A.100.GLU
1m5wA            A.221.ARG*A.197.TYR
1m5wA          A.122.ARG*A.80.LEUALA
1m5wA              A.51.ARG*A.47.ARG
1m5wA            A.138.GLU*A.181.PHE
1m5wA           A.6.LEUGLY*A.211.GLU
1q74A         A.286.ARGGLY*A.288.TRP
1q74A          A.71.GLULEU*A.244.HIS
1q74A            A.136.TYR*A.147.HIS
1q74A              A.131.HIS*A.6.ARG
1q74A             A.68.ARG*A.247.GLN
1q74A         A.151.HIS*A.137.ASPPRO
1q74A         A.273.TYR*A.272.HISTYR
1q74A         A.213.GLUILE*A.142.TYR
1q74A            A.234.ARG*A.255.ARG
1q74A         A.234.ARG*A.234.ARGALA
1q74A         A.176.THRVAL*A.175.TRP
1q74A              A.92.ARG*A.93.TRP
1q74A         A.129.ARGPRO*A.175.TRP
1q74A         A.214.ILEALA*A.142.TYR
1q74A          A.60.HISALA*B.107.ARG
1q74A           A.16.ASPGLU*A.11.HIS
1q74A          A.14.PROASP*A.244.HIS
1q74A        A.66.GLYTYR*B.66.GLYTYR
1q74A        A.89.GLYALA*A.86.TYRLEU
1gwuA         A.178.ARG*A.215.LEUSER
1gwuA         A.233.TYR*A.167.SERGLY
1gwuA         A.114.GLYPRO*A.274.PHE
1gwuA            A.159.ARG*A.283.ARG
1gwuA      A.192.LEUPRO*A.185.TYRASN
1gwuA         A.244.ILEGLN*A.183.ARG
1gwuA           A.64.GLU*A.52.SERILE
1gwuA            A.194.ASP*A.187.PHE
1gwuA         A.142.PHE*A.140.GLYPRO
1gwuA            A.305.ASN*A.296.GLN
1gwuA            A.221.PHE*A.170.HIS
1gwuA           A.92.PROARG*A.93.ARG
1gwuA         A.106.GLN*A.106.GLNGLN
3fbzA              A.58.ASN*B.24.ARG
3fbzA        A.97.ASPPRO*A.95.SERPRO
3fbzA              A.24.ARG*B.58.ASN
3nqzA        A.41.GLNSER*A.39.METVAL
3nqzA            A.204.HIS*B.317.ASN
3nqzA            A.199.TYR*B.361.ASN
3nqzA          A.80.ARG*B.355.ASNSER
3nqzA         A.183.ARG*B.321.ASPGLY
3nqzA         A.159.TRP*A.160.VALASP
3nqzA         A.127.THRLYS*A.170.TYR
3nqzA             A.31.ASN*A.108.HIS
1q1uA              A.64.TYR*A.57.GLN
1q1uA           A.16.PHE*A.17.SERGLN
1q1uA         A.111.TRP*A.103.ARGGLN
1q1uA          A.102.TYR*A.68.ASNGLY
1q1uA             A.135.HIS*A.90.PHE
1q1uA         A.124.GLYASN*A.111.TRP
1q1uA          A.132.PROSER*A.19.GLN
1q1uA         A.135.HIS*A.131.LYSPRO
1q1uA              A.94.TYR*A.18.GLN
1q1uA         A.111.TRP*A.102.TYRARG
1q1uA             A.135.HIS*A.94.TYR
1q1uA           A.74.TYR*A.66.ALAMET
1o97C           C.89.ASPASP*C.88.TRP
1o97C         C.140.TRPPRO*D.182.ARG
1o97C         C.140.TRP*C.177.PROALA
1o97C            C.233.TYR*C.231.ARG
1o97C             C.165.GLU*D.15.ARG
1o97C         C.127.TYR*C.125.GLNALA
1o97C      C.166.GLYGLY*D.253.SERGLY
1o97C              C.33.TYR*C.68.ARG
1o97C           C.86.ARG*C.66.PROASP
1o97C      C.132.ILESER*D.104.SERSER
1o97C       C.94.GLYSER*C.221.GLYALA
1o97C            C.170.GLN*D.185.ASN
1o97C           C.88.TRP*C.65.GLYPRO
4nekA      A.102.ALAILE*A.106.GLYSER
4nekA           A.99.ARG*A.57.GLNTHR
4nekA          A.5.VALLEU*A.3.GLULEU
4nekA         A.124.PHEHIS*A.162.PHE
4nekA         A.217.ASPARG*A.213.GLU
4nekA              A.51.PHE*A.39.PHE
3ly0A             A.25.ARG*A.103.TRP
3ly0A         A.136.METGLU*A.135.HIS
3ly0A         A.233.ASNALA*A.243.ASN
3ly0A         A.338.ARG*A.334.GLUPRO
3ly0A            A.8.PHE*A.50.GLYGLY
3ly0A           A.12.ASNASP*A.11.HIS
3ly0A         A.344.ASN*A.339.LYSLEU
3ly0A           A.89.GLN*A.88.GLUGLN
3ly0A        A.61.GLNALA*A.59.SERPRO
3ly0A            A.153.HIS*A.158.ARG
3ly0A          A.77.PHE*A.177.ARGPHE
3ly0A         A.172.HISGLY*A.212.ASN
3ly0A              A.64.ASP*A.63.HIS
3ly0A            A.224.ASP*A.200.ASN
3ly0A         A.344.ASN*A.297.ASPHIS
3ly0A          A.100.HIS*A.18.LEULEU
3ly0A         A.305.PHE*A.316.ASPVAL
3ly0A         A.304.ASP*A.307.GLYALA
3ly0A         A.145.ASP*A.143.GLYALA
3ly0A             A.11.HIS*A.231.HIS
3ly0A           A.48.PHE*A.50.GLYGLY
3ly0A          A.99.GLYHIS*B.147.ASP
3ly0A            A.150.HIS*B.106.ARG
3ly0A           A.42.ARG*A.37.HISLEU
3ly0A         A.178.PHE*A.271.ASPGLY
3ly0A         A.294.LEUGLY*A.253.ARG
3ly0A            A.293.ARG*A.289.HIS
3ly0A            A.106.ARG*B.150.HIS
3ly0A         A.343.GLU*A.338.ARGLYS
3ly0A           A.56.TYR*A.57.VALPRO
3ly0A         A.112.PHE*A.113.LYSVAL
3ly0A          A.147.ASP*B.99.GLYHIS
3ly0A         A.281.GLUPRO*A.285.ARG
3ly0A         A.190.GLU*A.190.GLUALA
4itbA         A.433.TYR*B.223.LYSPRO
4itbA         A.385.PHE*A.231.GLYSER
4itbA         A.339.TYR*A.306.THRGLU
4itbA         A.426.GLYGLY*A.435.ARG
4itbA            A.381.ASN*A.407.ASP
4itbA           A.46.GLNARG*A.50.TRP
4itbA         A.388.GLYALA*A.233.ASP
4itbA              A.17.PHE*A.15.GLN
4itbA         A.453.LEULYS*A.452.TRP
4itbA         A.302.GLYPRO*A.258.ASN
4itbA         A.181.GLNTHR*A.180.PHE
4itbA      A.259.GLYGLN*A.361.PHEALA
4itbA         A.260.GLNSER*A.361.PHE
4itbA            A.443.ARG*A.118.TYR
4itbA            A.132.PHE*A.257.ASN
4itbA         A.341.TYR*A.332.ARGPRO
4itbA         A.332.ARG*A.331.GLYARG
4itbA          A.174.GLYPHE*A.50.TRP
4itbA         A.228.GLU*A.228.GLULEU
4itbA         A.414.ASNGLY*A.392.TRP
4itbA         A.223.LYSPRO*B.433.TYR
4itbA         A.171.GLU*A.171.GLUALA
4itbA            A.104.ASN*A.115.TYR
4itbA           A.48.ARG*A.44.PHESER
4itbA          A.198.ARG*A.29.LEUALA
4itbA            A.340.PHE*A.336.ARG
3b4wA         A.448.PROGLY*A.119.TYR
3b4wA         A.231.THRGLY*A.230.PHE
3b4wA         A.120.PHE*A.168.ALAPRO
3b4wA         A.455.TYR*A.435.ARGTHR
3b4wA         A.332.SERGLU*A.367.PHE
3b4wA         A.444.TYR*A.445.ALAPHE
3b4wA           A.72.ARG*A.68.PROPRO
3b4wA           A.15.GLYLYS*A.12.PHE
3b4wA         A.455.TYR*A.436.THRGLY
3b4wA          A.59.PHE*A.148.GLYVAL
3b4wA         A.420.TRP*A.442.ASNTRP
3b4wA          A.72.ARG*A.173.ALAGLY
3b4wA            A.336.ARG*A.359.ARG
3b4wA          A.193.ALAGLU*A.12.PHE
3b4wA           A.38.GLYLYS*A.36.TYR
3b4wA         A.417.GLYSER*A.439.TYR
3b4wA         A.420.TRP*A.418.SERVAL
3b4wA         A.413.TYR*A.256.GLYGLY
3b4wA         A.398.TYR*A.296.ALAPRO
3b4wA         A.370.GLN*A.359.ARGPRO
3b4wA         A.389.PHE*A.286.GLNGLY
3b4wA         A.100.GLN*A.283.ASNALA
3b4wA      A.389.PHEGLY*A.285.GLYGLN
3b4wA         A.413.TYR*A.257.GLYLYS
3b4wA         A.462.ARG*A.453.GLYGLY
1w0hA            A.261.ARG*A.272.ARG
1w0hA            A.304.ARG*A.289.ASP
1w0hA         A.320.GLULYS*A.257.TRP
1w0hA         A.136.GLU*A.293.HISCYS
1w0hA            A.301.ASN*A.288.TYR
1w0hA            A.147.PHE*A.179.ASN
1w0hA         A.147.PHE*A.148.VALHIS
1w0hA         A.261.ARG*A.275.THRLYS
1w0hA         A.169.THRPHE*A.213.TRP
1w0hA         A.127.TYR*A.225.TYRSER
1w0hA            A.126.TYR*A.317.ARG
1w0hA      A.179.ASNTHR*A.177.GLUILE
1w0hA         A.140.GLUGLU*A.185.PHE
1w0hA         A.291.ARG*A.190.THRGLY
1w0hA         A.147.PHE*A.139.CYSGLU
4i6vA             A.382.TRP*A.97.ARG
4i6vA              A.40.ASP*A.37.ASN
4i6vA         A.239.TYR*A.188.CYSALA
4i6vA            A.300.TYR*A.303.ARG
4i6vA         A.224.THRPRO*A.258.TRP
4i6vA         A.136.GLN*A.135.SERGLN
4i6vA            A.179.ARG*A.146.PHE
4i6vA            A.163.ARG*A.165.ASP
4i6vA         A.232.GLUGLY*A.236.ARG
4i6vA         A.302.TYRARG*A.306.PHE
4i6vA             A.366.ASN*C.81.HIS
4i6vA         A.296.ARG*B.297.VALSER
4i6vA            A.342.HIS*A.359.ARG
4i6vA            A.287.TYR*A.288.GLN
4i6vA            A.410.ARG*C.105.ARG
4i6vA            A.278.ASN*B.300.TYR
4i6vA         A.282.TYR*A.284.SERGLY
4i6vA            A.404.ARG*A.400.PHE
4i6vA           A.397.PHE*A.8.PROILE
4i6vA            A.300.TYR*C.278.ASN
4i6vA         A.263.PHECYS*A.202.PHE
4i6vA            A.355.ASP*A.324.ASN
4i6vA            A.388.TYR*A.371.TYR
4i6vA            A.307.ASN*C.283.GLU
4i6vA         A.250.GLNILE*A.254.ARG
4i6vA             A.81.HIS*B.366.ASN
4i6vA         A.196.HISALA*A.186.PHE
4i6vA         A.371.TYR*A.372.TYRSER
4i6vA            A.345.TYR*A.344.TRP
4i6vA      A.280.ARGVAL*A.282.TYRGLU
4i6vA         A.389.ARG*A.385.PHEGLN
4i6vA            A.283.GLU*B.307.ASN
4i6vA         A.144.ASN*A.142.LEUTHR
4i6vA         A.178.GLN*A.174.PROGLU
4i6vA            A.410.ARG*A.406.TRP
4i6vA      A.402.VALGLY*A.400.PHEVAL
4h89A           A.48.TRP*A.73.ALAASN
4h89A           A.88.SERALA*A.76.TYR
4h89A         A.104.ARG*A.104.ARGALA
4h89A         A.154.HIS*A.159.GLYTYR
4h89A         A.154.HIS*A.155.HISPRO
4h89A            A.143.PHE*A.124.PHE
4h89A         A.154.HISHIS*A.153.PHE
4h89A               A.9.ARG*A.12.GLU
4h89A         A.168.ARGPRO*A.167.HIS
4h89A              A.48.TRP*A.74.ASN
4h89A           A.91.PHE*A.89.ALASER
4h8wC        C.64.GLNGLY*C.21.LYSLYS
4h8wC           C.37.LEUGLY*C.27.HIS
4h8wC              C.67.PHE*C.26.PHE
4h8wC       C.40.GLNGLY*G.473.GLYASN
4h8wC           C.38.GLYASN*C.26.PHE
4h8wC           C.65.GLYASN*C.67.PHE
4h8wC             C.25.GLN*G.474.ASN
4h8wC           C.28.TRP*C.83.ILECYS
4h8wC         C.134.ARG*C.152.GLNASP
3hkoA         A.293.LEUSER*A.277.PHE
3hkoA         A.113.ALAMET*A.104.PHE
3hkoA            A.305.PHE*A.295.ASN
3hkoA              A.36.ARG*A.76.TYR
3hkoA          A.161.SERALA*A.69.HIS
3hkoA            A.30.ASN*A.9.LYSTYR
3hkoA         A.298.ASN*A.303.GLUARG
3hkoA         A.144.ASPPHE*A.148.ARG
3hkoA         A.170.GLYILE*A.202.PHE
3hkoA          A.165.TYR*A.68.HISHIS
3hkoA         A.233.GLUSER*A.235.TYR
3hkoA            A.319.PHE*A.318.GLN
3hkoA          A.196.PHEGLY*A.60.GLU
3hkoA         A.305.PHE*A.309.ARGALA
2w5qA            A.406.PHE*A.248.ASN
2w5qA         A.498.ALALYS*A.585.ASN
2w5qA            A.481.GLU*A.500.PHE
2w5qA            A.558.GLN*A.522.GLU
2w5qA         A.620.PHE*A.218.SERGLU
2w5qA         A.276.ASN*A.272.THRPRO
2w5qA            A.623.ASN*A.621.TYR
2w5qA         A.253.HIS*A.254.LEUGLU
2w5qA         A.449.ASP*A.272.THRPRO
2w5qA         A.569.THRLYS*A.523.TYR
2w5qA         A.582.ASN*A.571.ASPTYR
2w5qA         A.358.GLN*A.324.GLYASP
2w5qA            A.326.ASN*A.616.ASP
2w5qA         A.392.PHE*A.451.ALALEU
2w5qA         A.626.PHE*A.627.LYSLYS
2w5qA         A.567.PHE*A.598.ASNLYS
2w5qA         A.291.PHE*A.507.GLYPHE
2w5qA         A.634.TYR*A.364.GLYILE
2w5qA         A.439.ASP*A.431.SERASN
2w5qA            A.476.HIS*A.475.ASP
2w5qA         A.507.GLYPHE*A.509.TRP
2w5qA         A.622.LYSASN*A.621.TYR
2w5qA            A.239.GLU*A.240.TYR
2w5qA         A.563.ARG*A.314.LEUPRO
2w5qA         A.287.TYR*A.288.PHEPRO
2w5qA         A.419.PHE*A.416.HISTYR
2w5qA         A.258.GLNTHR*A.257.PHE
2w5qA         A.524.ALAGLY*A.291.PHE
2w5qA         A.625.ASPPHE*A.623.ASN
2w5qA         A.556.HIS*A.557.ASNGLN
2w5qA            A.552.PHE*A.240.TYR
2w5qA            A.291.PHE*A.508.PHE
2w5qA            A.523.TYR*A.290.ASN
1dm5A            A.117.ASN*A.161.GLU
1dm5A              A.43.ARG*A.10.HIS
1dm5A           A.48.ARG*A.44.SERASN
1dm5A            A.316.HIS*A.295.TYR
1dm5A             A.16.ARG*B.199.ARG
1dm5A              A.59.PHE*A.23.ARG
1dm5A         A.145.GLYASN*A.149.ARG
1dm5A         A.187.THRASP*A.184.GLN
1dm5A            A.169.HIS*A.166.ASN
1dm5A             A.95.HIS*A.131.TYR
1dm5A         A.208.PHE*A.204.LEUHIS
1dm5A         A.178.TYR*A.182.GLUGLY
1dm5A           A.14.ASNSER*A.13.PHE
1dm5A         A.159.ARG*A.197.ALATHR
1dm5A             A.199.ARG*C.16.ARG
1dm5A        A.4.GLNGLY*A.277.ILEASP
1dm5A         A.117.ASN*A.157.GLYGLY
3fmeA         A.167.GLU*A.167.GLUHIS
3fmeA         A.223.GLU*A.221.ALAPRO
3fmeA         A.305.TYR*A.166.LEUGLU
3fmeA            A.313.PHE*A.287.PHE
2hz7A         A.375.ASP*A.345.GLUALA
2hz7A         A.247.HIS*A.203.ALAGLY
2hz7A         A.373.ARG*A.629.LYSASP
2hz7A            A.118.TYR*A.117.GLU
2hz7A            A.205.GLU*A.206.PHE
2hz7A            A.252.TYR*A.256.HIS
2hz7A         A.420.LEUVAL*A.428.ARG
2hz7A            A.604.TRP*A.594.ARG
2hz7A            A.263.GLU*A.138.TYR
2hz7A         A.172.ARG*A.172.ARGLEU
2hz7A         A.255.GLU*A.255.GLUHIS
2hz7A            A.581.TYR*A.445.TYR
2hz7A         A.306.TYR*A.529.VALPRO
2hz7A          A.77.SERGLY*A.118.TYR
2hz7A            A.603.PHE*A.597.PHE
2hz7A           A.54.GLUILE*A.58.ARG
2hz7A         A.380.ALAPRO*A.408.TRP
2hz7A         A.103.ASNLEU*A.102.PHE
2hz7A            A.139.TYR*A.241.ARG
2hz7A         A.147.TYR*A.143.TYRPHE
2hz7A         A.240.PHE*A.114.ALAARG
2hz7A            A.525.ARG*A.632.TRP
2hz7A              A.81.HIS*A.84.HIS
2hz7A        A.45.PROLEU*A.47.VALALA
2hz7A         A.287.LYSLEU*A.289.ASN
2hz7A            A.295.HIS*A.293.ARG
2hz7A         A.604.TRP*A.605.ARGASP
2hz7A         A.157.GLNGLY*A.159.ASP
2hz7A           A.61.GLU*A.61.GLUALA
2hz7A            A.136.HIS*A.101.GLN
2hz7A             A.358.ARG*A.51.PHE
2hz7A      A.573.ASPSER*A.575.LEUARG
3hdfA          A.158.GLU*A.97.THRMET
3hdfA            A.115.ARG*A.138.TRP
3hdfA           A.56.THRGLY*A.55.HIS
3hdfA         A.117.SERTHR*A.121.ARG
3hdfA         A.151.THRARG*A.146.TRP
3hdfA             A.84.ARG*B.140.TYR
3hdfA         A.152.ARG*A.138.TRPTHR
3hdfA            A.146.TRP*A.108.ASN
1xg4A            A.279.TYR*A.274.TYR
1xg4A         A.153.PHE*A.110.ALAGLY
1xg4A           A.44.LEUSER*A.43.TYR
1xg4A             A.4.HIS*A.5.SERPRO
1xg4A          A.36.ARG*A.275.GLUSER
1xg4A           A.90.PHE*A.63.THRLEU
1xg4A       A.120.ALALYS*A.59.LEUGLY
1xg4A              A.72.ARG*D.72.ARG
1xg4A        A.17.GLUASN*A.19.PROLEU
1am7A         A.106.PROMET*A.110.ARG
1am7A           A.42.PHE*A.34.ASPVAL
1am7A           A.31.HISGLY*A.22.ASP
1am7A           A.63.GLYALA*A.68.GLN
1am7A              A.91.GLN*A.86.PHE
3zk9A         A.115.TYR*A.110.THRGLU
3zk9A            A.126.TYR*A.131.ASN
3zk9A         A.195.PROALA*A.197.GLU
3zk9A         A.139.HISALA*A.210.TYR
3zk9A         A.116.PHE*A.112.ASNLYS
3zk9A         A.139.HISALA*A.141.TRP
3zk9A             A.87.TYR*A.100.PHE
3zk9A         A.169.TYR*A.165.ASNLYS
3zk9A         A.305.GLUGLY*A.274.TYR
3zk9A         A.223.TRP*A.204.SERGLU
3zk9A            A.157.GLN*A.116.PHE
3zk9A            A.230.GLU*A.223.TRP
3zk9A           A.57.HIS*A.58.SERILE
3zk9A          A.91.ASN*A.134.GLYLYS
3zk9A           A.70.GLUPRO*A.69.TYR
3fm5A              A.36.ARG*B.56.ARG
3fm5A        A.49.GLNALA*A.47.CYSGLU
1k8kG             G.10.ARG*B.327.GLU
1k8kG           G.28.ASP*G.26.ASPGLU
1k8kG           G.25.VALASP*G.24.PHE
1k8kG         G.143.ARG*G.139.GLYSER
1k8kG           G.21.GLU*G.21.GLUASN
1k8kG             G.19.TYR*B.333.ASP
3qioA         A.464.GLNLYS*A.457.TYR
3qioA         A.432.GLUPRO*A.532.TYR
3qioA         A.432.GLU*A.431.LYSGLU
3qioA              A.81.TRP*A.85.TRP
3qioA            A.475.GLN*A.501.TYR
3qioA         A.536.VALPRO*A.535.TRP
3qioA         A.532.TYR*A.533.LEUALA
3i3tA         A.399.ASP*A.400.LEUSER
3i3tA         A.244.ASP*A.242.ARGARG
3i3tA            A.271.HIS*A.270.TRP
3i3tA      A.456.PROARG*A.458.ILELEU
3i3tA         A.229.CYSLEU*A.554.PHE
3i3tA            A.300.GLN*A.294.PHE
3i3tA         A.244.ASPPHE*A.239.PHE
3i3tA            A.314.HIS*A.318.ASN
3i3tA         A.245.PHE*A.243.ARGASP
3i3tA         A.222.PHE*A.220.THRCYS
3i3tA          A.510.HIS*B.73.LEUARG
3i3tA         A.389.TYR*A.390.ARGSER
3i3tA      A.433.ASNALA*A.429.LEUGLU
3i3tA         A.529.TRP*A.523.CYSARG
3i3tA         A.397.PHE*A.376.GLYGLN
3i3tA         A.464.ASNARG*A.466.PHE
3i3tA            A.297.TYR*C.297.TYR
3i3tA         A.256.GLNGLU*A.316.GLU
3i3tA          A.466.PHE*B.71.LEUARG
3i3tA            A.359.TRP*A.454.ARG
3i3tA         A.368.SERLYS*A.319.ARG
3i3tA         A.510.HIS*A.511.SERGLY
3i3tA         A.300.GLN*A.299.GLNGLN
3i3tA         A.462.HIS*A.463.LEUASN
1u2pA               A.39.ARG*A.6.HIS
1u2pA             A.139.PHE*A.65.HIS
1u2pA           A.71.HIS*A.72.ARGALA
1u2pA           A.93.HIS*A.11.CYSTHR
1u2pA            A.9.PHE*A.21.ALAGLU
1u2pA           A.56.GLU*A.56.GLUARG
1u2pA            A.156.ARG*A.159.ARG
1u2pA            A.113.PHE*A.108.ARG
1u2pA         A.114.ASP*A.144.SERALA
1u2pA              A.93.HIS*A.90.ASP
2q4fA         A.112.GLYCYS*A.104.PHE
2q4fA            A.128.ARG*A.132.GLN
2q4fA           A.41.GLYPHE*B.73.ASP
2q4fA           A.23.VALASP*A.92.GLN
2q4fA        A.67.GLNPRO*A.69.VALVAL
2q4fA          A.123.ASP*A.93.LYSVAL
2q4fA           A.40.PROGLY*A.34.GLN
4kieA         A.347.VALPRO*A.125.TRP
4kieA         A.249.PHE*A.277.PHEPRO
4kieA            A.263.ASP*A.235.GLU
4kieA         A.101.ASPASN*A.100.ASN
4kieA            A.146.TRP*A.122.PHE
4kieA            A.290.GLN*A.322.GLU
4kieA           A.99.ILEASN*A.98.TYR
4kieA            A.259.PHE*A.249.PHE
4kieA         A.133.GLN*A.327.ALAASP
4kieA         A.105.HIS*A.106.HISILE
4kieA         A.139.GLYCYS*A.195.PHE
4kieA         A.128.PROVAL*A.130.PHE
4kg7A         A.171.SERGLU*A.175.ARG
4kg7A         A.181.GLU*A.181.GLUTHR
4kg7A          A.42.ALAGLY*A.113.TYR
4kg7A            A.358.PHE*A.369.ARG
4kg7A         A.115.GLUSER*A.112.ASP
4kg7A       A.86.GLYALA*A.149.GLUALA
4kg7A         A.139.GLYPRO*A.141.ASP
4kg7A            A.355.ARG*A.196.ARG
4kg7A          A.89.GLN*A.355.ARGSER
4kg7A      A.385.ILEGLY*A.305.ILEALA
4kg7A          A.162.PHEALA*A.51.ARG
4kg7A         A.144.SERGLY*A.143.PHE
4kg7A         A.302.TRP*A.275.SERTRP
4kg7A         A.383.ASN*A.300.GLYPRO
4kg7A         A.157.GLN*A.157.GLNASN
4kg7A         A.300.GLYPRO*A.302.TRP
4kg7A       A.124.ASPGLY*A.55.ILETHR
4kg7A         A.265.TRP*A.301.PROTRP
3id6C        C.33.VALPRO*C.31.ASNLEU
3id6C           C.41.GLU*C.41.GLUARG
3id6C          C.146.ASN*A.94.ARGGLU
3id6C              C.93.HIS*C.52.ARG
3id6C           C.142.SERVAL*A.9.HIS
3id6C           C.20.PHEASN*C.22.ASP
3id6C              C.93.HIS*C.54.TRP
3id6C             C.82.TYR*C.151.TYR
4p1nA            A.688.TRP*C.492.ASN
4p1nA         A.589.ALAGLU*A.670.TYR
4p1nA         A.709.ASPARG*A.710.ARG
4p1nA         A.580.ALALYS*A.782.TRP
3k63A         A.143.ARG*A.142.ILEARG
3k63A            A.169.TYR*A.196.TYR
3k63A         A.232.SERGLY*A.234.PHE
3k63A         A.196.TYR*A.200.ASPPHE
3k63A            A.135.PHE*A.218.ASP
3k63A         A.178.ILEGLN*A.179.GLN
3t9yA        A.28.TYRPRO*A.23.TYRASP
3t9yA               A.9.ASN*A.12.ASP
3t9yA           A.94.TYR*A.92.LYSGLY
2retA           A.70.GLNTHR*A.66.GLU
2retA           A.74.TRP*A.63.GLYGLU
2retA          A.89.PHE*A.107.SERTYR
2retA           A.74.TRP*A.62.ASNGLY
2retA              A.70.GLN*A.72.TRP
2retA           A.96.THRTHR*A.73.TYR
2retA           A.72.TRP*A.39.PHEALA
2retA           A.66.GLU*A.69.GLYGLN
2retA              A.47.GLN*A.74.TRP
2jc4A         A.152.ALAASP*A.173.ARG
2jc4A           A.32.LEUGLN*A.33.GLN
2jc4A         A.239.ARGALA*A.208.PHE
2jc4A           A.77.HIS*A.78.PHEGLY
2jc4A            A.197.PHE*A.192.HIS
2jc4A          A.100.ARG*A.93.ALAALA
2jc4A              A.42.PHE*A.56.TRP
2jc4A          A.14.ARG*A.244.PROSER
2jc4A         A.158.ASPPRO*A.160.GLU
2jc4A         A.218.HIS*A.216.ILEASP
2jc4A         A.198.TYR*A.213.GLYLEU
2jc4A      A.138.HISGLY*A.140.LYSLEU
2jc4A         A.200.TRP*A.201.PHEASP
2jc4A         A.120.LYSGLU*A.175.TRP
2jc4A              A.7.ASN*A.247.HIS
3skqA            A.392.TYR*A.238.HIS
3skqA         A.281.ARG*A.277.ASPASN
3skqA         A.229.LYSGLU*A.367.TYR
3skqA         A.371.PHESER*A.238.HIS
3skqA            A.357.PHE*A.195.HIS
3skqA            A.367.TYR*A.365.GLU
3skqA         A.379.GLU*A.379.GLUTHR
3l9qA            A.300.HIS*A.345.TYR
3l9qA         A.382.HIS*A.304.GLYGLY
3l9qA         A.365.PHESER*A.443.HIS
3l9qA         A.419.HIS*A.417.GLYTHR
3l9qA         A.445.ASNGLN*B.453.ARG
3l9qA         A.386.PHE*A.423.ALACYS
3l9qA         A.418.THRHIS*A.420.TYR
3l9qA            A.432.HIS*A.428.PHE
3l9qA            A.388.HIS*A.387.ARG
3l9qA         A.307.METGLN*A.365.PHE
3l9qA         A.309.TYR*A.291.LEUHIS
3l9qA            A.401.TYR*A.289.ARG
3l9qA         A.345.TYR*A.343.LYSGLY
3l9qA         A.302.ARGHIS*A.306.ARG
4r3oE            E.155.HIS*E.168.ARG
4r3oE         E.166.ASPALA*E.185.TYR
4r3oE         E.155.HIS*E.156.METASP
4r3oE         E.135.ARGPRO*E.123.PHE
4r3oE           E.34.GLYSER*E.53.ARG
4r3oE              E.10.ARG*E.22.PHE
4r3oE          E.58.LEUMET*D.156.TRP
4r3oE          E.226.PHE*E.68.VALGLU
4r3oE             E.100.TRP*L.57.ARG
4r3oE         E.226.PHE*E.227.HISMET
4r3oE         E.227.HIS*E.228.METPHE
4r3oE            E.135.ARG*D.120.GLN
4r3oE         E.113.THRGLN*E.162.PHE
4r3oE           E.26.TYR*D.11.SERPRO
4i3yA             A.85.TRP*A.109.TYR
4i3yA              A.61.TYR*A.57.PHE
4i3yA         A.109.TYR*A.110.PHETYR
4i3yA         A.200.HIS*A.201.ILEASN
4i3yA            A.191.ARG*B.101.GLU
4i3yA            A.101.GLU*B.191.ARG
4i3yA      A.264.TYRARG*A.262.GLNLYS
4i3yA         A.179.TYR*A.180.ARGLEU
4i3yA           A.19.GLN*A.19.GLNILE
4i3yA        A.90.ILEASP*A.88.ASPPRO
4i3yA         A.240.PHE*A.241.ILEILE
4i3yA            A.234.HIS*A.110.PHE
4i3yA              A.83.HIS*A.65.HIS
4i3yA          A.69.ALAGLU*A.208.TRP
4i3yA            A.111.TYR*A.112.GLU
4i3yA         A.121.TYR*A.122.ASPTYR
2yizA           A.39.PHE*D.45.ARGGLY
2yizA           A.38.TRP*A.63.GLYPHE
2yizA           A.45.ARGGLY*B.39.PHE
2yizA            A.6.ARGVAL*A.64.PHE
2yizA           A.17.GLYVAL*A.56.PHE
1vemA         A.120.SERGLU*A.195.TYR
1vemA         A.106.TRP*A.104.PROSER
1vemA         A.343.TYR*A.296.ASNASN
1vemA             A.61.GLN*A.144.GLU
1vemA         A.481.PHE*A.500.GLNSER
1vemA         A.484.PHE*A.438.TYRILE
1vemA         A.495.TRPGLN*A.516.TRP
1vemA           A.12.LYSALA*A.11.TYR
1vemA         A.244.GLYTYR*A.240.PHE
1vemA              A.70.ARG*A.28.TRP
1vemA            A.387.ASN*A.454.TYR
1vemA         A.239.GLN*A.239.GLNPHE
1vemA          A.89.HIS*A.170.ALAGLY
1vemA         A.464.SERASN*A.466.ASP
1vemA           A.70.ARGPHE*A.28.TRP
1vemA          A.72.ALAGLN*A.156.TYR
1vemA           A.14.TYR*A.12.LYSALA
1vemA            A.178.TYR*A.174.ARG
1vemA              A.49.ASP*A.51.TRP
1vemA         A.343.TYR*A.339.SERTYR
1vemA            A.175.TYR*A.257.TYR
1vemA           A.63.PHE*A.61.GLNGLN
1vemA      A.234.PROSER*A.236.ASPGLY
1vemA          A.65.PHE*A.148.ALAPHE
1vemA          A.106.TRP*A.59.GLYASP
1vemA         A.393.PHE*A.394.THRLEU
1vemA            A.495.TRP*A.484.PHE
1vemA         A.237.GLYGLU*A.189.ARG
1vemA         A.415.LEUGLY*A.411.PHE
1vemA         A.200.LYSSER*A.204.ARG
1vemA         A.460.TYR*A.461.ASPSER
1vemA            A.131.ASN*A.118.PHE
1vemA         A.441.GLYASN*A.449.TRP
2j23A               A.8.TYR*A.64.GLN
2j23A           A.26.TRP*A.57.VALASP
2j23A           A.83.GLYGLN*A.84.GLN
2j23A           A.13.GLN*A.13.GLNVAL
1ei7A        A.15.SERALA*A.52.TRPLYS
1ei7A        A.15.SERALA*A.53.LYSPRO
1ei7A              A.17.TRP*A.70.TYR
1ei7A              A.12.PHE*A.70.TYR
1ei7A           A.44.VALGLN*A.87.PHE
1ei7A          A.140.ASNARG*A.62.PHE
1ei7A           A.70.TYR*A.72.TYRASN
1ei7A           A.1.SERTYR*A.152.TRP
1ei7A         A.112.ARG*A.112.ARGARG
1ei7A              A.71.ARG*A.72.TYR
1ei7A         A.152.TRP*A.153.THRSER
3f5dA             A.21.TYR*A.182.ASN
3f5dA         A.137.PHE*A.138.VALGLU
3f5dA         A.113.ASN*A.132.LYSPRO
3f5dA         A.130.GLN*A.109.ASNGLY
3f5dA            A.105.PHE*A.109.ASN
3f5dA          A.101.GLYALA*A.75.TRP
3f5dA             A.29.ARG*A.169.PHE
3f5dA            A.170.ASP*A.174.ASN
3f5dA            A.193.TYR*A.189.PHE
2ehwA              A.38.ARG*A.63.HIS
2ehwA          A.114.ARG*C.69.ALAGLN
2ehwA           A.43.ARG*A.39.PROGLU
2ehwA           A.54.GLUGLU*A.58.ARG
4ox0A              A.69.ARG*D.69.ARG
4ox0A           A.32.ASPALA*A.36.ARG
4ox0A           A.88.ARG*A.84.GLNSER
4ox0A              A.74.GLN*B.74.GLN
4ox0A           A.55.GLUSER*A.59.ARG
3ecrA             A.91.ASN*A.228.ARG
3ecrA            A.328.ARG*A.315.ASP
3ecrA            A.163.HIS*A.142.GLU
3ecrA         A.284.GLYVAL*A.286.TRP
3ecrA         A.303.HIS*A.304.VALPRO
3ecrA         A.153.ARG*A.190.ILELEU
3ecrA           A.92.GLUVAL*A.25.ARG
3ecrA         A.300.ALATHR*A.278.GLN
3ecrA         A.161.PHE*A.137.LEUGLU
3ecrA            A.156.GLN*A.286.TRP
3ecrA      A.338.GLYILE*A.255.ALAPHE
3ecrA         A.122.PROHIS*A.216.TYR
3oeqA         A.143.ASPLEU*A.149.TRP
3oeqA           A.67.ASN*A.63.GLNGLU
3oeqA         A.142.PHE*A.140.ASNARG
3oeqA         A.132.LEUALA*A.131.TRP
3oeqA         A.131.TRP*A.140.ASNARG
1p1xA            A.51.ARG*B.1051.ARG
1p1xA           A.96.TYR*A.50.PROARG
1p1xA         A.200.PHE*A.201.LYSPRO
2vcyA         A.303.LYSASP*A.278.ARG
2vcyA           A.81.PROILE*A.83.ASN
2vcyA      A.251.PHELYS*A.249.ASNPHE
2vcyA         A.144.PHE*A.142.ALAVAL
2vcyA         A.138.TRP*A.104.GLYGLY
2vcyA         A.310.PHE*A.311.TRPLEU
2vcyA            A.315.TRP*A.319.HIS
1b9lA           A.45.ALAARG*A.46.ARG
1b9lA           A.96.ALAGLU*A.95.TYR
1b9lA             A.88.ARG*A.118.TRP
1b9lA              A.90.HIS*A.91.HIS
1b9lA              A.72.ARG*A.18.PHE
1b9lA             A.108.TYR*F.16.ARG
1b9lA            A.104.HIS*F.104.HIS
1b9lA           A.41.PROALA*A.43.ASP
1b9lA           A.71.ASNARG*A.73.PHE
1b9lA         A.119.GLNARG*A.118.TRP
1b9lA            A.40.TYR*A.6.ALAILE
3ujpA         A.238.TRP*A.219.CYSGLU
3ujpA         A.236.TYR*A.238.TRPPRO
3ujpA           A.92.GLUPRO*A.91.TYR
3ujpA          A.89.HISGLY*A.116.ARG
3ujpA            A.109.TYR*A.118.PHE
3ujpA         A.268.CYSGLU*A.269.GLU
3ujpA            A.261.ASN*A.215.PHE
3ujpA      A.115.GLUARG*A.113.ASNLEU
3ujpA         A.183.TYRTYR*A.187.ASN
3ujpA         A.269.GLUSER*A.291.ASN
3ujpA         A.267.PHE*A.265.THRILE
3ujpA            A.316.ARG*B.175.GLU
3ujpA         A.115.GLUARG*A.117.TRP
3ujpA         A.180.ASNALA*A.184.TYR
3aizC             C.204.ASN*C.20.GLU
3aizC           C.47.ILEASP*C.46.PHE
3aizC            C.200.GLU*C.201.TYR
3aizC      C.182.ASNGLY*B.107.THRGLY
3aizC         C.130.PHE*C.131.LYSALA
3aizC              C.16.ARG*C.13.TYR
3aizC            C.236.TYR*C.228.ARG
3aizC           C.24.GLU*C.24.GLUILE
2glfA           A.57.PHE*A.58.ALAGLY
2glfA             A.21.PHE*A.442.TYR
2glfA           A.67.TYR*A.52.VALPRO
2glfA           A.351.TYR*A.7.LYSASN
2glfA         A.246.GLYALA*A.430.PHE
2glfA         A.390.GLN*A.351.TYRGLY
2glfA         A.289.GLYALA*A.277.PHE
2glfA         A.300.ARG*A.296.LEULYS
2glfA         A.430.PHE*D.132.ILEPRO
2glfA           A.65.THRVAL*A.51.PHE
2glfA             A.70.ASN*A.294.PHE
2glfA            A.398.ASP*A.362.ARG
2glfA             A.121.TYR*A.99.ARG
2glfA         A.280.GLU*A.280.GLUGLU
2glfA            A.102.PHE*A.116.PHE
2glfA             A.71.ARG*A.287.ASN
2glfA          A.17.GLUILE*A.439.PHE
2glfA           A.47.ASP*A.43.LYSARG
2glfA         A.111.GLUGLN*A.112.GLN
3n7zA         A.325.ASNHIS*A.298.TRP
3n7zA         A.133.CYSALA*A.353.TYR
3n7zA             A.87.TYR*B.158.ARG
3n7zA            A.172.TYR*A.185.ARG
3n7zA         A.160.ASNLYS*A.195.TYR
3n7zA         A.203.TYR*A.204.TYRASP
3n7zA             A.158.ARG*C.87.TYR
3n7zA         A.129.GLYTRP*A.344.ASN
3n7zA            A.326.HIS*A.298.TRP
3n7zA           A.21.ARG*A.17.ARGGLU
3n7zA         A.165.PROGLU*A.164.HIS
3n7zA             A.76.PHE*A.293.GLN
3n7zA         A.117.LEUHIS*A.280.PHE
3n7zA         A.385.PHE*A.386.ILETYR
3n7zA          A.382.ARG*A.71.ILEGLY
3n7zA         A.130.TRP*A.282.GLYARG
3n7zA           A.95.TYR*A.93.SERGLY
3n7zA           A.16.PHE*A.12.LYSGLU
3n7zA         A.316.TRP*A.314.ALAGLN
3imkA          A.106.ASP*A.82.GLYILE
3imkA              A.94.PHE*A.67.GLU
3imkA         A.122.TRP*A.102.CYSLEU
3imkA           A.54.LEUGLN*A.55.GLN
3imkA              A.41.ARG*A.50.GLU
3imkA          A.132.ASN*A.69.ASNVAL
4o0cA         A.197.VALGLY*A.196.ARG
4o0cA         A.208.TYR*A.209.ALAASP
4o0cA         A.296.GLYILE*A.285.TRP
4o0cA         A.282.SERMET*A.278.TRP
4o0cA       A.79.ALASER*A.200.SERPRO
4o0cA         A.295.PHEGLY*A.285.TRP
4o0cA           A.29.ARG*A.25.GLNGLY
4o0cA         A.239.GLUGLN*A.240.GLN
4o0cA         A.182.TYR*A.207.GLYTYR
4o0cA          A.84.GLYLYS*A.211.ASN
4o0cA            A.232.ARG*A.236.PHE
4o0cA         A.294.HISPHE*A.285.TRP
4o0cA          A.81.ILEMET*A.182.TYR
4o0cA           A.169.VALGLY*A.8.HIS
4o0cA          A.35.TYR*A.288.ALALYS
1oi6A            A.192.GLN*A.188.TYR
1oi6A          A.64.TYR*A.145.LEUALA
1oi6A         A.177.ALAGLU*A.181.ARG
1oi6A         A.192.GLNGLU*A.196.ARG
1oi6A          A.44.PHE*A.135.LEUSER
1oi6A          A.78.ALAARG*A.106.GLN
1oi6A           A.44.PHE*A.72.ALALYS
1oi6A           A.30.TYR*A.31.GLNGLU
1oi6A        A.30.TYRGLN*A.28.LEUPRO
1oi6A         A.197.ARG*A.193.GLUILE
1oi6A         A.114.LEUPRO*A.113.TYR
4fypA         A.252.GLUASP*A.273.HIS
4fypA         A.121.TRP*A.241.GLYASN
4fypA         A.205.THRLYS*A.207.TRP
4fypA         A.166.GLUTHR*A.101.ASN
4fypA           A.82.TYR*A.57.CYSARG
4fypA         A.127.ASPTHR*A.245.ASP
4fypA         A.139.TYRGLY*A.144.GLU
4fypA         A.239.ILEVAL*A.238.ASN
4fypA              A.58.ARG*B.58.ARG
4fypA            A.124.ASP*A.249.ASP
4fypA           A.95.TYR*A.91.LYSGLN
4fypA         A.125.LEUASP*A.124.ASP
4fypA            A.221.GLN*A.186.ASP
4fypA           A.92.GLNTYR*A.86.TYR
4fypA          A.72.PHE*A.266.TYRTYR
3qrlA         A.103.HIS*A.104.ASPLEU
3qrlA           A.7.ARG*A.134.SERGLY
3qrlA           A.74.PHE*A.71.ASPPRO
3qrlA         A.112.TYRGLU*A.113.GLU
3qrlA         A.105.LEUASN*A.104.ASP
3qrlA           A.32.TRP*A.78.GLUGLN
3qrlA           A.82.GLYGLY*A.84.PHE
3qrlA           A.74.PHEARG*A.69.PHE
3qrlA           A.15.GLN*A.15.GLNHIS
3p42A          A.59.TRP*A.145.GLNARG
3p42A         A.220.LEUGLY*A.219.TRP
3p42A         A.194.GLUGLY*A.115.ARG
3p42A            A.205.TRP*A.206.ASN
3p42A         A.254.HISHIS*D.124.PHE
3p42A      A.132.ASNPRO*A.130.ASNSER
3p42A         A.167.GLYARG*A.211.GLU
3p42A         A.125.VALARG*A.124.PHE
3p42A            A.253.HIS*C.124.PHE
3p42A         A.165.LEUALA*A.164.TRP
2bkyA           A.54.GLU*X.69.GLYSER
2bkyA              A.42.ARG*B.71.ARG
2bkyA              A.71.ARG*B.42.ARG
3uejA            A.262.GLU*A.232.ARG
3uejA         A.257.GLN*A.254.LEUVAL
3uejA            A.269.HIS*A.252.TRP
3uejA         A.246.HIS*A.275.LYSVAL
2hjrA       A.236.LEULEU*D.49.GLYVAL
2hjrA         A.160.ASP*A.156.SERGLY
2hjrA         A.138.VALTYR*A.281.PHE
2hjrA             A.77.TYR*A.117.ASN
2hjrA         A.269.THRTYR*A.281.PHE
2hjrA            A.126.PHE*A.257.TYR
2hjrA             A.94.ARG*A.100.ARG
2hjrA       A.49.GLYVAL*D.236.LEULEU
2hjrA         A.163.ARG*A.229.GLYGLY
2hjrA         A.271.LEUTHR*A.270.TYR
2hjrA              A.74.GLU*A.79.TYR
2hjrA          A.121.TYR*A.77.TYRGLU
2hjrA             A.243.PHE*A.24.GLN
2hjrA              A.72.PHE*A.42.TYR
2hjrA           A.74.GLU*A.73.GLYGLU
3iiiA         A.132.LYSGLY*A.228.ASN
3iiiA         A.444.PHE*A.272.GLYLEU
3iiiA         A.291.TRP*A.289.GLULYS
3iiiA            A.352.PHE*A.279.PHE
3iiiA         A.199.TYR*A.243.LEUPHE
3iiiA         A.398.THRPHE*A.397.TYR
3iiiA         A.426.PHE*A.515.GLYSER
3iiiA      A.378.SERALA*A.547.GLYGLY
3iiiA            A.380.HIS*A.367.GLU
3iiiA         A.516.SERGLU*A.426.PHE
3iiiA           A.67.PHE*A.65.GLYLYS
3iiiA            A.456.TRP*A.205.HIS
3iiiA         A.476.HIS*A.474.PROTRP
3iiiA            A.199.TYR*A.204.PHE
3iiiA         A.389.LYSGLN*A.390.GLN
3iiiA         A.193.GLUGLY*A.274.HIS
3iiiA         A.294.VALHIS*A.293.TYR
3iiiA            A.138.TRP*A.217.TRP
3iiiA         A.393.VALSER*A.395.PHE
3iiiA          A.160.ASN*A.67.PHEPRO
3iiiA         A.342.TYRLYS*A.297.ARG
3iiiA         A.347.LYSSER*A.335.TYR
3iiiA         A.394.SERPHE*A.395.PHE
3iiiA      A.167.GLYVAL*A.171.LEUALA
3iiiA            A.247.PHE*A.241.HIS
3iiiA            A.224.ARG*A.225.TRP
3iiiA            A.152.TRP*A.156.GLN
3iiiA         A.262.LEULEU*A.315.PHE
3iiiA         A.139.SERLYS*A.177.TRP
3iiiA         A.156.GLNSER*A.158.TRP
3iiiA            A.300.TRP*A.299.GLU
3iiiA         A.454.THRGLY*A.456.TRP
3iiiA            A.338.ARG*A.441.PHE
3iiiA         A.499.SERGLY*A.268.TRP
3iiiA            A.293.TYR*A.311.ARG
2iykA           A.92.ASP*A.93.SERVAL
2iykA         A.120.GLNPRO*A.119.TRP
2iykA      A.121.PROLEU*A.123.ILEGLN
2iykA           A.33.TRP*A.25.VALTYR
2iykA              A.38.ARG*B.38.ARG
2iykA           A.31.LYSLYS*A.26.TYR
2iykA           A.28.ASN*A.57.GLUVAL
2iykA           A.27.CYSASN*A.26.TYR
2iykA       A.101.GLNPRO*A.99.CYSARG
2iykA              A.49.HIS*A.34.PHE
3rs1A           A.89.TYRALA*B.89.TYR
3rs1A         A.164.THRASN*A.166.ASN
3rs1A             A.105.TYR*A.96.TRP
3rs1A         A.125.ALAGLN*A.126.GLN
3rs1A          A.104.PHETYR*A.96.TRP
3rs1A            A.106.PHE*B.141.ARG
3rs1A         A.183.TYR*A.190.SERSER
3rs1A            A.183.TYR*A.198.ARG
3rs1A         A.149.TRP*A.112.ASNTRP
3rs1A            A.154.ARG*A.161.TRP
3rs1A         A.102.LYSCYS*A.104.PHE
3rs1A            A.112.ASN*A.195.TYR
3rs1A         A.105.TYR*A.106.PHESER
1sy7A         A.681.GLU*A.681.GLUSER
1sy7A         A.103.LYSVAL*A.102.PHE
1sy7A         A.462.GLU*A.462.GLUHIS
1sy7A         A.295.TYR*A.293.GLYALA
1sy7A         A.355.PHE*A.150.ALAVAL
1sy7A         A.442.LEUGLU*A.441.TYR
1sy7A         A.622.ILEPRO*A.621.PHE
1sy7A         A.406.PHE*A.422.ASNTYR
1sy7A         A.641.TRP*A.613.ARGSER
1sy7A          A.407.ASNARG*B.80.ARG
1sy7A            A.393.GLU*A.390.ASN
1sy7A            A.464.PHE*A.531.HIS
1sy7A         A.703.ALALYS*A.715.TYR
1sy7A            A.250.ARG*A.444.TYR
1sy7A             A.99.PHE*A.341.ARG
1sy7A         A.722.ASN*A.683.TYRGLY
1sy7A         A.127.PHE*A.128.VALARG
1sy7A            A.257.TRP*A.149.PHE
1sy7A         A.327.ASP*A.325.PROGLU
1sy7A         A.461.LYSGLU*A.463.HIS
1sy7A         A.264.HIS*A.262.GLYVAL
1sy7A         A.156.GLUGLU*A.157.GLU
1sy7A         A.122.ARG*A.115.PROVAL
1sy7A            A.470.PHE*A.219.TRP
1sy7A          A.80.ARG*B.407.ASNARG
1sy7A         A.466.GLNALA*A.215.HIS
1sy7A          A.127.PHE*A.97.GLYALA
1sy7A            A.612.PHE*A.607.HIS
1sy7A              A.76.GLU*A.44.ASP
1sy7A            A.160.TRP*A.153.PHE
1sy7A            A.409.ASP*B.347.PHE
1sy7A          A.127.PHE*A.98.ALAPHE
1sy7A             A.129.ARG*A.89.ARG
1sy7A       A.93.ALAARG*A.136.SERARG
1sy7A            A.203.PHE*A.207.GLN
1sy7A            A.342.ASN*A.287.TRP
1sy7A         A.582.GLN*A.581.ASNGLN
1sy7A            A.637.ARG*A.613.ARG
1sy7A           A.74.ALAARG*A.55.TRP
1sy7A             A.94.ARG*A.283.ARG
1sy7A         A.657.GLU*A.625.GLYALA
1sy7A            A.568.ASN*A.599.ASN
1sy7A            A.414.HIS*B.414.HIS
1sy7A            A.212.GLU*A.210.HIS
1sy7A             A.386.ARG*A.89.ARG
1sy7A         A.246.ALAGLN*A.247.GLN
1sy7A         A.406.PHE*A.423.TYRTYR
1sy7A         A.180.ASPVAL*A.206.PHE
1sy7A            A.347.PHE*B.409.ASP
1sy7A         A.723.TRP*A.721.ARGASN
1sy7A         A.280.ASPPHE*A.278.ASP
1sy7A         A.680.HIS*A.681.GLUSER
1sy7A            A.202.ASN*A.188.GLU
1sy7A         A.234.GLNGLY*A.236.PHE
1sy7A      A.294.ALATYR*A.289.ALAILE
1sy7A         A.277.GLN*A.273.LYSLEU
1sy7A         A.105.TYR*A.334.ILEGLY
1sy7A            A.190.HIS*A.191.ASN
[truncated: 11,323,888 more chars]
