# Supplementary material for: Pi-Pi contacts are an overlooked protein feature relevant to phase separation
Source: eLife journal article supplement (doi:10.7554/elife.31486), 2018-02-09
Supplement: supp [file elife-31486-supp-v1.zip › elife_poa_e31486_Figure_1_source_data_2.txt]

2pbqA TOT.174 # CYS.5 MET.3 ILE.20 GLN.4 VAL.14 LYS.14 ASN.2 PRO.13 THR.11 PHE.3 ALA.13 GLY.14 ASP.12 LEU.14 ARG.8 GLU.11 TYR.5 SER.8
2e3dA TOT.286 # CYS.5 ILE.19 GLN.9 VAL.32 MET.11 TRP.2 PRO.18 LYS.17 THR.14 PHE.5 ASN.8 GLY.18 HIS.9 LEU.27 ARG.7 ASP.16 ALA.24 GLU.26 TYR.7 SER.12
3n89A TOT.337 # CYS.3 GLN.12 ASP.16 SER.22 VAL.19 GLY.11 ASN.26 PRO.22 LYS.15 THR.23 PHE.15 ALA.19 HIS.11 MET.17 ILE.28 LEU.30 ARG.15 TRP.1 GLU.19 TYR.13
4qa5A TOT.364 # CYS.10 GLN.14 ILE.25 SER.21 VAL.26 LYS.21 ASN.10 PRO.17 GLY.32 THR.18 PHE.14 ALA.26 MET.9 HIS.13 LEU.32 ARG.11 TRP.4 ASP.24 GLU.17 TYR.20
1zczA TOT.441 # CYS.1 GLN.6 ILE.29 SER.26 VAL.37 MET.7 ASN.13 PRO.20 LYS.34 THR.13 PHE.24 ALA.50 HIS.6 GLY.35 ASP.22 LEU.40 ARG.18 TRP.7 GLU.42 TYR.11
2jg1A TOT.313 # CYS.3 HIS.9 VAL.24 GLN.20 LYS.17 ILE.25 PRO.14 THR.16 PHE.9 ALA.23 GLY.26 ASP.14 GLU.23 LEU.35 ARG.6 TRP.1 ASN.22 TYR.9 SER.17
1zdnA TOT.151 # CYS.2 MET.1 ILE.10 VAL.8 GLN.1 LYS.8 ASN.8 PRO.13 THR.10 PHE.5 ALA.10 HIS.5 GLY.12 ASP.6 LEU.22 ARG.7 TRP.1 GLU.15 TYR.5 SER.2
4mx6A TOT.305 # GLN.20 ILE.10 SER.21 VAL.28 LYS.26 ASN.16 PRO.13 THR.12 PHE.18 ALA.28 HIS.4 GLY.15 ASP.19 LEU.30 ARG.9 TRP.4 GLU.19 TYR.6 MET.7
3rkoF TOT.168 # CYS.1 GLN.4 ILE.19 SER.7 VAL.20 MET.6 ASN.3 PRO.5 LYS.2 THR.5 PHE.9 ALA.20 GLY.16 HIS.3 LEU.25 ARG.4 TRP.2 ASP.2 GLU.9 TYR.6
3rkoG TOT.100 # ILE.11 VAL.6 GLN.5 MET.5 PRO.1 ASP.2 THR.2 PHE.3 ASN.4 GLY.9 HIS.2 LEU.20 ARG.6 TRP.1 ALA.12 GLU.3 TYR.2 SER.6
3rkoD TOT.473 # CYS.1 ILE.30 VAL.46 GLN.11 GLY.42 PRO.20 LYS.8 THR.16 PHE.25 ALA.54 HIS.7 MET.18 ASP.9 GLU.9 LEU.85 ARG.13 TRP.9 ASN.12 TYR.21 SER.37
3gb5A TOT.185 # CYS.2 GLN.5 ASP.6 SER.10 VAL.18 MET.5 ASN.5 PRO.13 LYS.10 THR.11 PHE.5 ALA.11 HIS.8 GLY.7 ILE.13 LEU.20 ARG.12 TRP.1 GLU.18 TYR.5
3rbyA TOT.245 # CYS.1 GLN.7 ASP.12 SER.21 VAL.22 LYS.14 PRO.12 THR.15 PHE.14 ASN.21 HIS.5 GLY.18 ILE.10 LEU.20 ARG.9 TRP.7 ALA.9 GLU.19 TYR.7 MET.2
3rkoC TOT.504 # CYS.3 GLN.20 ILE.40 SER.31 VAL.35 LYS.13 ASN.8 PRO.21 ASP.9 THR.23 PHE.40 ALA.45 GLY.46 HIS.11 LEU.76 ARG.11 TRP.17 GLU.13 TYR.16 MET.26
4lb0A TOT.342 # CYS.6 ASP.21 SER.18 GLN.13 VAL.31 LYS.8 ILE.20 PRO.18 THR.23 PHE.10 ASN.7 GLY.37 HIS.9 LEU.32 ARG.21 TRP.5 ALA.32 GLU.17 TYR.4 MET.10
3a9bA TOT.374 # CYS.4 MET.2 ASP.27 ASN.25 GLN.14 LYS.12 PRO.21 THR.22 PHE.11 ALA.45 HIS.7 GLY.24 ILE.25 LEU.23 ARG.18 TRP.9 VAL.27 GLU.24 TYR.15 SER.19
3ulhA TOT.81 # GLN.3 ASP.7 SER.5 VAL.7 LYS.5 ASN.3 PRO.2 THR.4 PHE.4 ALA.9 HIS.2 GLY.9 ILE.2 LEU.9 ARG.4 GLU.4 TYR.2
1pvmA TOT.178 # CYS.5 GLN.1 ASP.14 SER.10 VAL.21 LYS.15 THR.7 PRO.9 HIS.3 PHE.5 ALA.6 GLY.9 ILE.11 GLU.11 LEU.14 ARG.12 TRP.1 ASN.12 TYR.7 MET.5
3be6A TOT.289 # CYS.2 GLN.13 ASP.18 SER.20 VAL.18 LYS.11 ASN.6 PRO.20 HIS.7 PHE.10 THR.18 GLY.22 ILE.27 LEU.27 ARG.20 TRP.2 ALA.27 GLU.17 TYR.4
1ym0A TOT.228 # CYS.11 GLN.5 ILE.18 SER.21 VAL.25 LYS.4 PRO.10 HIS.5 PHE.7 THR.15 GLY.22 ASP.19 GLU.5 LEU.7 ARG.9 TRP.5 ALA.17 ASN.12 TYR.9 MET.2
1t9iA TOT.152 # CYS.1 ASP.9 SER.10 GLN.12 LYS.16 ASN.7 PRO.5 THR.10 PHE.8 ALA.7 GLY.6 HIS.2 ILE.9 LEU.19 ARG.6 TRP.2 VAL.11 GLU.7 TYR.5
1wohA TOT.303 # CYS.3 GLN.9 ASP.26 SER.12 VAL.28 LYS.3 ASN.7 PRO.26 THR.17 PHE.14 ALA.38 GLY.25 HIS.8 ILE.9 LEU.35 ARG.23 TRP.2 GLU.10 TYR.4 MET.4
4i0wB TOT.449 # CYS.4 GLN.8 ILE.40 SER.34 VAL.33 LYS.24 PRO.20 ASP.24 THR.25 PHE.19 ASN.34 GLY.47 HIS.6 LEU.40 ARG.15 TRP.5 ALA.24 GLU.27 TYR.20
4i0wA TOT.84 # GLN.2 ASP.5 SER.4 VAL.7 LYS.2 PRO.3 THR.3 PHE.4 GLU.6 GLY.8 ILE.14 LEU.12 ARG.1 ALA.2 ASN.6 TYR.5
4tyzA TOT.107 # CYS.2 GLN.5 ASP.6 SER.9 VAL.4 LYS.7 ILE.8 PRO.2 THR.6 PHE.9 ALA.9 GLY.4 HIS.3 GLU.7 LEU.12 ARG.2 TRP.3 ASN.4 TYR.3 MET.2
3wgxA TOT.106 # CYS.3 MET.1 HIS.6 GLN.5 VAL.6 LYS.7 ILE.2 PRO.3 THR.4 PHE.5 ASN.2 GLY.9 ASP.5 LEU.13 ARG.4 TRP.3 ALA.7 GLU.9 TYR.5 SER.7
1fd3A TOT.41 # CYS.6 ASP.1 GLN.1 VAL.2 LYS.5 PRO.5 THR.3 PHE.1 ALA.1 HIS.1 GLY.6 ILE.3 LEU.2 ARG.2 TYR.1 SER.1
2ogfA TOT.118 # CYS.1 GLN.2 ILE.8 SER.4 VAL.12 LYS.16 PRO.4 THR.5 PHE.6 GLU.13 GLY.6 HIS.2 LEU.11 ARG.5 ASP.6 ALA.5 ASN.5 TYR.7
2yn0A TOT.248 # CYS.4 HIS.4 SER.17 GLN.6 VAL.13 LYS.14 ILE.15 PRO.19 THR.10 PHE.11 ALA.12 GLY.15 ASP.12 ASN.12 LEU.24 ARG.11 TRP.6 GLU.23 TYR.14 MET.6
3tixB TOT.421 # CYS.5 ASP.24 SER.36 GLN.20 LYS.28 ASN.20 PRO.18 HIS.6 PHE.26 THR.22 GLY.16 ILE.23 LEU.66 ARG.16 TRP.4 ALA.16 VAL.28 GLU.23 TYR.18 MET.6
3n27A TOT.73 # ILE.7 VAL.4 GLN.3 LYS.9 ASN.6 THR.4 ALA.5 GLY.2 ASP.5 LEU.7 ARG.2 TRP.1 GLU.8 TYR.2 SER.8
4l0fA TOT.437 # CYS.3 MET.8 ILE.18 VAL.33 GLN.11 LYS.13 ASN.19 PRO.22 THR.30 PHE.13 ALA.42 HIS.13 GLY.28 ASP.31 LEU.49 ARG.29 TRP.7 GLU.25 TYR.13 SER.30
4rapA TOT.379 # CYS.11 GLN.15 ILE.19 SER.21 VAL.24 LYS.14 TRP.12 PRO.26 THR.24 PHE.23 GLU.12 GLY.28 HIS.12 LEU.37 ARG.25 ASP.25 ALA.22 ASN.15 TYR.14
1hlcA TOT.129 # CYS.2 GLN.3 HIS.5 SER.14 VAL.7 LYS.10 ILE.4 PRO.5 GLY.13 THR.8 PHE.10 GLU.9 MET.3 ASP.8 LEU.13 ARG.4 TRP.1 ALA.1 ASN.8 TYR.1
3u6xS TOT.105 # CYS.1 GLN.3 ASP.8 SER.7 VAL.12 GLY.10 PRO.4 LYS.9 THR.8 PHE.6 ALA.4 HIS.1 MET.2 ILE.7 GLU.6 LEU.7 ARG.1 ASN.2 TYR.7
3c2gA TOT.581 # CYS.17 GLN.31 ILE.61 SER.25 VAL.33 LYS.28 PRO.40 THR.31 PHE.27 GLU.20 HIS.17 GLY.23 ASP.29 LEU.73 ARG.31 TRP.8 ALA.32 ASN.41 TYR.14
4h0sA TOT.105 # CYS.14 GLN.1 HIS.3 SER.12 VAL.5 MET.3 PRO.5 LYS.6 THR.8 ARG.3 ALA.3 GLY.5 ILE.5 GLU.3 LEU.5 TRP.2 ASP.9 ASN.6 TYR.6 PHE.1
2o28A TOT.182 # CYS.6 GLN.6 ASP.8 SER.12 VAL.16 LYS.15 ASN.5 PRO.9 THR.15 PHE.10 ALA.6 HIS.4 GLY.12 ILE.6 LEU.21 ARG.7 TRP.1 GLU.13 TYR.6 MET.4
3atsA TOT.352 # CYS.1 GLN.13 HIS.11 SER.15 VAL.38 MET.9 ASN.5 PRO.22 LYS.3 THR.22 PHE.18 ALA.32 GLY.24 ASP.24 ILE.10 LEU.35 ARG.24 TRP.13 GLU.24 TYR.9
3cc6A TOT.269 # CYS.9 GLN.4 ILE.20 SER.13 VAL.22 LYS.19 GLY.15 PRO.14 ASP.15 THR.11 PHE.11 ASN.11 MET.10 HIS.5 LEU.27 ARG.13 TRP.6 ALA.10 GLU.22 TYR.12
1lu4A TOT.133 # CYS.2 GLN.6 ILE.2 SER.9 VAL.11 LYS.2 PRO.8 THR.10 PHE.10 ALA.22 GLY.8 ASP.7 GLU.3 LEU.9 ARG.5 TRP.5 ASN.9 TYR.3 MET.2
3ghaA TOT.186 # CYS.2 ILE.10 SER.11 GLN.8 LYS.25 ASN.8 PRO.10 THR.10 PHE.12 ALA.9 HIS.2 GLY.10 ASP.19 LEU.11 ARG.1 TRP.3 VAL.14 GLU.16 TYR.3 MET.2
3osvA TOT.130 # GLN.5 ASP.9 SER.15 VAL.15 LYS.9 PRO.4 THR.9 PHE.3 ALA.8 GLY.13 ILE.7 GLU.2 LEU.12 ARG.2 TRP.2 ASN.8 TYR.4 MET.3
4r30A TOT.179 # CYS.5 HIS.6 SER.10 GLN.10 GLY.11 ILE.9 PRO.9 LYS.8 THR.8 PHE.5 ALA.13 MET.9 ASP.5 ASN.6 LEU.16 ARG.10 TRP.5 VAL.15 GLU.11 TYR.8
1ddwA TOT.109 # GLN.5 ILE.7 SER.12 VAL.6 LYS.9 PRO.4 THR.11 PHE.9 ALA.8 HIS.4 GLY.5 ASP.4 GLU.5 LEU.3 ARG.5 TRP.2 ASN.6 TYR.4
2ps1A TOT.224 # CYS.2 ILE.27 SER.16 GLN.10 LYS.17 PRO.4 THR.10 PHE.11 ALA.22 HIS.2 GLY.19 ASP.9 GLU.16 LEU.21 ARG.6 VAL.12 ASN.9 TYR.9 MET.2
3bpdA TOT.89 # ILE.11 SER.4 GLN.2 LYS.7 PRO.2 THR.3 PHE.1 ASN.5 HIS.3 GLY.7 ASP.6 LEU.11 ARG.2 ALA.3 VAL.12 GLU.9 TYR.1
4nvrA TOT.296 # CYS.8 HIS.12 GLN.13 VAL.15 LYS.10 ILE.16 PRO.19 THR.21 PHE.16 ALA.27 GLY.23 ASP.19 GLU.13 LEU.31 ARG.17 TRP.5 ASN.7 TYR.10 SER.14
2hd0A TOT.127 # CYS.2 HIS.4 VAL.11 GLN.4 GLY.13 ASN.3 PRO.5 LYS.5 ASP.5 THR.6 PHE.2 ALA.14 MET.4 ILE.8 LEU.17 ARG.9 TRP.3 GLU.3 TYR.4 SER.5
1kyfA TOT.247 # CYS.5 MET.4 ILE.15 GLN.23 VAL.14 LYS.13 PRO.12 THR.19 PHE.19 ALA.11 HIS.2 GLY.16 ASP.10 GLU.13 LEU.26 ARG.10 TRP.1 ASN.18 TYR.3 SER.13
1x9iA TOT.300 # GLN.6 ILE.24 SER.15 VAL.34 MET.5 PRO.18 LYS.15 THR.13 PHE.6 ALA.30 HIS.7 GLY.19 ASP.9 GLU.26 LEU.27 ARG.21 TRP.4 ASN.10 TYR.11
1kzlA TOT.202 # CYS.3 GLN.7 ASP.18 SER.9 VAL.22 LYS.12 PRO.5 THR.17 PHE.9 ALA.13 HIS.6 GLY.17 ILE.16 GLU.10 LEU.13 ARG.6 TRP.1 ASN.6 TYR.6 MET.6
2a6zA TOT.222 # CYS.2 GLN.16 ILE.8 SER.22 VAL.16 LYS.13 PRO.9 THR.12 PHE.12 GLU.7 GLY.20 ASP.18 LEU.19 ARG.9 TRP.4 ALA.6 ASN.18 TYR.8 MET.3
3da0A TOT.132 # GLN.5 ILE.9 SER.8 VAL.12 LYS.8 ASN.12 PRO.5 THR.13 PHE.7 ALA.7 HIS.3 GLY.15 ASP.6 LEU.8 ARG.5 TRP.4 GLU.3 TYR.1 MET.1
4v2yA TOT.104 # CYS.5 GLN.6 HIS.4 SER.7 VAL.3 MET.2 ILE.6 PRO.5 LYS.1 THR.3 PHE.8 ALA.7 GLY.15 ASP.4 ASN.1 LEU.9 ARG.7 TRP.5 GLU.4 TYR.2
3wbpA TOT.128 # CYS.6 ASP.6 SER.15 GLN.8 LYS.7 ASN.10 PRO.6 THR.7 PHE.6 ALA.2 HIS.4 GLY.7 ILE.8 LEU.5 ARG.6 TRP.7 VAL.6 GLU.6 TYR.3 MET.3
3c8uA TOT.202 # CYS.3 ASP.14 SER.6 GLN.8 LYS.3 ASN.6 PRO.15 THR.5 PHE.6 ALA.31 HIS.5 GLY.17 ILE.8 LEU.29 ARG.17 TRP.4 VAL.11 GLU.12 TYR.2
1pt6A TOT.192 # CYS.1 GLN.8 ILE.15 SER.12 VAL.18 LYS.14 PRO.3 THR.14 PHE.8 ALA.12 HIS.4 GLY.13 ASP.11 GLU.16 LEU.14 ARG.11 TRP.1 ASN.10 TYR.4 MET.3
2ep5A TOT.349 # CYS.1 GLN.10 ILE.39 SER.18 VAL.32 LYS.34 PRO.21 ASP.15 THR.16 PHE.4 GLU.28 GLY.22 HIS.5 LEU.31 ARG.11 TRP.3 ALA.20 ASN.23 TYR.6 MET.10
3kbeA TOT.140 # CYS.2 HIS.7 GLN.4 VAL.14 MET.1 TRP.1 PRO.6 LYS.6 THR.12 PHE.3 ALA.15 GLY.22 ILE.8 GLU.6 LEU.8 ARG.5 ASP.5 ASN.7 TYR.2 SER.6
2osoA TOT.144 # CYS.3 ASP.7 GLN.2 VAL.10 LYS.15 ASN.7 PRO.9 HIS.1 PHE.12 ALA.5 GLY.9 ILE.17 LEU.13 TRP.1 THR.1 GLU.19 TYR.7 SER.6
3te6A TOT.255 # CYS.2 ILE.32 GLN.12 VAL.18 LYS.23 PRO.9 THR.11 PHE.12 ALA.13 HIS.5 GLY.7 ASP.13 GLU.13 LEU.28 ARG.6 TRP.2 ASN.22 TYR.8 SER.19
4nguA TOT.299 # ILE.14 VAL.23 GLN.15 LYS.17 ASN.12 PRO.15 THR.18 PHE.19 ALA.34 HIS.5 GLY.22 ASP.15 LEU.21 ARG.10 TRP.3 GLU.25 TYR.10 SER.21
3rkoB TOT.612 # CYS.3 ILE.33 SER.34 GLN.11 LYS.15 PRO.18 ASP.14 THR.33 PHE.38 ALA.69 GLY.58 HIS.15 GLU.15 LEU.99 ARG.15 TRP.16 VAL.58 ASN.20 TYR.19 MET.29
2otuA TOT.115 # CYS.2 GLN.8 ILE.7 SER.17 VAL.7 LYS.7 ASN.1 PRO.5 GLY.11 THR.9 PHE.4 ALA.5 HIS.2 MET.2 ASP.6 LEU.8 ARG.2 TRP.1 GLU.5 TYR.6
4c9rB TOT.105 # CYS.16 ILE.3 SER.8 GLN.4 LYS.6 PRO.6 THR.1 PHE.7 ASN.3 HIS.1 GLY.10 ASP.7 LEU.6 ARG.9 ALA.1 VAL.3 GLU.6 TYR.5 MET.3
2qjcA TOT.219 # CYS.3 ASP.12 SER.11 GLN.8 LYS.10 ILE.11 PRO.13 THR.12 PHE.4 ALA.17 GLY.22 HIS.7 ASN.8 LEU.25 ARG.14 TRP.3 VAL.24 GLU.9 TYR.6
1h0hA TOT.976 # CYS.18 ILE.52 GLN.27 VAL.52 LYS.79 PRO.56 GLY.81 THR.61 PHE.33 ALA.86 HIS.22 MET.27 ASP.53 GLU.58 LEU.60 ARG.41 TRP.32 ASN.49 TYR.43 SER.46
1h0hB TOT.214 # CYS.14 GLN.6 ILE.10 SER.9 VAL.11 LYS.11 PRO.14 THR.15 PHE.10 ALA.23 HIS.8 GLY.9 ASP.19 GLU.12 LEU.10 ARG.10 TRP.2 ASN.8 TYR.6 MET.7
3rkoA TOT.95 # CYS.2 ILE.8 SER.4 VAL.10 MET.2 LYS.1 THR.2 PHE.11 ALA.13 GLY.9 ASP.2 LEU.15 ARG.6 TRP.4 GLU.3 TYR.3
1mkkA TOT.93 # CYS.6 ILE.8 GLN.6 VAL.6 LYS.4 PRO.7 GLY.5 THR.3 PHE.4 ASN.3 HIS.4 MET.5 ASP.4 LEU.4 ARG.4 ALA.2 GLU.10 TYR.4 SER.4
4n7vC TOT.33 # HIS.1 SER.1 GLN.2 LYS.1 PRO.1 THR.1 MET.1 ASP.8 LEU.6 ARG.1 GLU.8 TYR.2
4hwuA TOT.81 # CYS.2 GLN.2 ASP.5 SER.4 VAL.8 GLY.6 ASN.3 PRO.4 LYS.3 THR.7 PHE.1 ALA.9 HIS.1 MET.2 ILE.4 LEU.7 ARG.3 TRP.2 GLU.5 TYR.3
4pz0A TOT.301 # CYS.1 ILE.18 VAL.33 GLN.18 LYS.25 PRO.12 THR.19 PHE.13 ALA.21 GLY.27 ASP.21 GLU.15 LEU.17 ARG.5 TRP.4 ASN.19 TYR.13 SER.20
3irpX TOT.418 # ILE.29 SER.28 GLN.12 MET.4 PRO.13 LYS.21 THR.39 PHE.24 ALA.24 HIS.6 GLY.36 ASP.35 GLU.12 LEU.21 ARG.16 TRP.2 VAL.34 ASN.39 TYR.23
2o6wA TOT.145 # CYS.2 ASP.6 GLN.3 VAL.7 LYS.5 PRO.5 THR.10 PHE.2 ASN.20 HIS.1 GLY.10 ILE.8 LEU.24 ARG.6 TRP.1 ALA.12 GLU.14 TYR.3 SER.6
2bv5A TOT.268 # CYS.8 HIS.11 VAL.20 GLN.18 LYS.7 ILE.21 PRO.19 GLY.15 THR.16 PHE.8 ALA.13 MET.6 ASP.12 ASN.6 LEU.21 ARG.15 TRP.5 GLU.21 TYR.12 SER.14
3ruxA TOT.260 # CYS.1 GLN.11 ASP.22 SER.12 VAL.31 LYS.2 ILE.13 PRO.13 THR.10 PHE.1 ALA.36 GLY.28 HIS.3 GLU.9 LEU.32 ARG.23 TRP.6 ASN.6 TYR.1
4uosA TOT.188 # ASP.4 SER.2 VAL.10 MET.18 LYS.54 GLU.38 GLY.6 ILE.20 LEU.20 ALA.12 ASN.4
2jliA TOT.93 # GLN.4 ILE.9 SER.3 VAL.10 LYS.4 PRO.6 GLY.3 THR.6 PHE.2 ALA.10 MET.1 HIS.2 GLU.7 LEU.8 ARG.7 ASP.3 TRP.1 ASN.3 TYR.4
1w07A TOT.643 # CYS.13 GLN.33 ASP.35 SER.31 VAL.50 LYS.31 ASN.25 PRO.23 THR.36 PHE.25 ALA.62 GLY.46 HIS.18 ILE.27 LEU.70 ARG.36 TRP.9 GLU.36 TYR.25 MET.12
2dpfA TOT.111 # CYS.4 GLN.6 ASP.8 SER.7 VAL.7 LYS.4 PRO.2 THR.5 PHE.1 ALA.6 HIS.3 GLY.13 ILE.4 LEU.14 ARG.7 TRP.4 ASN.11 TYR.5
2osxA TOT.449 # CYS.2 GLN.17 ASP.38 SER.20 VAL.32 LYS.7 ASN.13 PRO.36 THR.34 PHE.11 ALA.49 HIS.7 GLY.44 ILE.17 LEU.33 ARG.27 TRP.12 GLU.20 TYR.21 MET.9
2fe5A TOT.94 # MET.3 ASP.5 ASN.7 GLN.4 LYS.7 PRO.3 THR.4 PHE.1 ALA.7 HIS.2 GLY.12 ILE.9 LEU.9 ARG.3 VAL.6 GLU.4 TYR.2 SER.6
4cdbA TOT.488 # CYS.1 GLN.15 ILE.33 SER.37 VAL.42 LYS.44 PRO.23 THR.25 PHE.12 ALA.39 HIS.6 GLY.27 ASP.27 GLU.28 LEU.28 ARG.12 TRP.7 ASN.53 TYR.25 MET.4
4icnA TOT.300 # CYS.3 GLN.8 ASP.17 SER.15 VAL.24 LYS.15 ASN.13 PRO.14 THR.22 PHE.7 ALA.37 HIS.6 GLY.27 ILE.23 LEU.30 ARG.7 TRP.2 GLU.16 TYR.7 MET.7
2qwtA TOT.167 # ASP.12 GLN.2 VAL.24 MET.3 ASN.1 PRO.5 LYS.2 THR.6 PHE.5 ALA.34 HIS.2 GLY.14 ILE.4 LEU.18 ARG.18 GLU.11 TYR.4 SER.2
3mcfA TOT.129 # CYS.3 GLN.1 ILE.3 SER.6 VAL.14 LYS.9 THR.3 PRO.5 HIS.9 PHE.3 ALA.8 GLY.10 ASP.5 LEU.12 ARG.10 TRP.3 GLU.18 TYR.5 MET.2
2vhkA TOT.206 # CYS.16 GLN.4 ASP.12 SER.14 VAL.10 LYS.11 PRO.12 THR.20 PHE.11 GLU.6 GLY.24 ILE.8 LEU.9 ARG.12 TRP.3 ALA.15 ASN.10 TYR.8 MET.1
2xr6A TOT.130 # CYS.6 ILE.3 SER.14 GLN.9 LYS.7 PRO.5 THR.4 PHE.8 ALA.7 HIS.1 GLY.9 ASP.6 GLU.9 LEU.8 ARG.4 TRP.9 VAL.5 ASN.12 TYR.2 MET.2
3gj8B TOT.27 # CYS.4 ASP.2 SER.3 GLN.1 LYS.3 ASN.1 PRO.1 THR.1 ALA.3 GLY.1 ILE.1 LEU.1 TRP.1 VAL.2 GLU.2
3whjA TOT.111 # ILE.6 SER.11 GLN.8 LYS.7 ASN.9 PRO.2 GLY.2 THR.4 PHE.3 ALA.3 HIS.3 MET.6 ASP.8 LEU.16 ARG.4 VAL.9 GLU.8 TYR.2
1o20A TOT.403 # CYS.4 ILE.37 SER.20 GLN.3 LYS.29 ASN.17 PRO.14 THR.23 PHE.10 ALA.32 HIS.7 GLY.26 ASP.22 LEU.33 ARG.30 TRP.3 VAL.42 GLU.42 TYR.9
3l12A TOT.280 # CYS.3 HIS.11 GLN.10 VAL.25 LYS.1 ASN.4 PRO.17 THR.20 PHE.8 ALA.30 GLY.29 ILE.8 LEU.34 ARG.21 TRP.5 ASP.19 GLU.17 TYR.9 SER.9
2f5kA TOT.83 # CYS.2 GLN.7 ILE.2 SER.2 VAL.7 LYS.12 ASN.4 PRO.4 ASP.4 THR.1 PHE.3 ALA.4 GLY.4 HIS.2 LEU.6 ARG.3 TRP.3 GLU.8 TYR.5
3kxwA TOT.558 # CYS.11 ILE.43 GLN.24 VAL.30 LYS.41 ASN.25 PRO.31 THR.31 PHE.29 ALA.38 HIS.24 GLY.30 ASP.27 LEU.59 ARG.17 TRP.7 GLU.36 TYR.21 SER.34
4wv4B TOT.93 # CYS.1 GLN.4 ILE.4 SER.10 VAL.9 LYS.3 ASN.2 PRO.2 THR.10 PHE.2 ALA.8 HIS.2 GLY.3 ASP.2 LEU.9 ARG.7 GLU.8 TYR.4 MET.3
4wv4A TOT.86 # CYS.1 ASP.7 SER.5 GLN.3 MET.3 ASN.3 PRO.5 LYS.5 THR.7 PHE.3 ALA.8 HIS.1 GLY.3 ILE.7 LEU.10 ARG.3 VAL.3 GLU.4 TYR.5
3p5pA TOT.745 # CYS.15 GLN.25 HIS.14 SER.51 VAL.44 LYS.43 ILE.42 PRO.27 THR.36 PHE.40 ALA.51 GLY.35 ASP.49 ASN.37 LEU.78 ARG.39 TRP.16 GLU.56 TYR.29 MET.18
1xkiA TOT.128 # CYS.1 GLN.2 ILE.5 SER.8 VAL.11 LYS.11 PRO.5 THR.10 PHE.2 ASN.4 HIS.3 GLY.13 ASP.6 LEU.11 ARG.6 TRP.1 ALA.9 GLU.12 TYR.5 MET.3
1j5wA TOT.262 # CYS.2 GLN.16 ASP.12 SER.12 VAL.20 LYS.10 ASN.14 PRO.11 THR.9 PHE.17 ALA.15 HIS.4 GLY.17 ILE.14 LEU.26 ARG.14 TRP.7 GLU.24 TYR.18
2fujA TOT.118 # GLN.2 ILE.8 SER.8 VAL.18 MET.4 ASN.6 PRO.4 LYS.5 THR.5 PHE.1 ALA.7 HIS.2 GLY.8 ASP.8 LEU.9 ARG.9 TRP.4 GLU.6 TYR.4
2cuyA TOT.305 # GLN.10 ILE.6 ASN.4 VAL.23 MET.7 PRO.20 LYS.11 ASP.7 THR.8 PHE.7 ALA.48 GLY.22 HIS.4 LEU.43 ARG.29 TRP.3 GLU.36 TYR.6 SER.11
4dncD TOT.41 # HIS.2 SER.4 VAL.3 LYS.4 ASN.1 PRO.3 PHE.1 ALA.2 ASP.5 LEU.5 ARG.6 TRP.1 GLU.4
4it1A TOT.424 # CYS.5 MET.10 HIS.14 VAL.26 GLN.22 LYS.19 ILE.22 PRO.27 THR.17 PHE.14 ASN.14 GLY.31 ASP.28 LEU.46 ARG.20 TRP.5 ALA.44 GLU.22 TYR.16 SER.22
3isrA TOT.267 # CYS.5 GLN.6 ILE.22 SER.23 VAL.17 LYS.10 ASN.12 PRO.11 THR.24 PHE.20 ALA.24 HIS.6 GLY.13 ASP.17 LEU.20 ARG.11 TRP.3 GLU.10 TYR.13
4izeA TOT.147 # CYS.3 GLN.10 ASP.7 SER.9 VAL.10 LYS.8 PRO.12 THR.12 PHE.5 ALA.7 GLY.9 ILE.10 GLU.9 LEU.14 ARG.4 TRP.2 ASN.7 TYR.6 MET.3
3mtsA TOT.56 # CYS.2 GLN.3 HIS.3 SER.3 VAL.3 LYS.6 ILE.2 PRO.2 THR.1 PHE.1 ASN.1 GLY.2 ASP.2 LEU.7 ARG.5 TRP.2 GLU.6 TYR.5
2bmeA TOT.175 # CYS.3 GLN.6 HIS.2 SER.11 VAL.10 LYS.12 TRP.2 THR.12 PHE.11 ASN.10 GLY.13 ILE.12 LEU.17 ARG.9 ASP.9 ALA.14 GLU.14 TYR.6 MET.2
3ujpA TOT.274 # CYS.2 ASP.17 SER.11 VAL.26 GLN.15 LYS.13 ILE.15 PRO.16 THR.17 PHE.10 ALA.24 GLY.16 HIS.2 GLU.23 LEU.22 ARG.9 TRP.3 ASN.16 TYR.12 MET.5
3onjA TOT.92 # MET.1 ASP.8 VAL.4 GLN.8 LYS.7 ILE.4 PRO.3 THR.6 PHE.2 ASN.3 GLY.2 HIS.1 LEU.12 ARG.2 TRP.1 ALA.7 GLU.8 TYR.2 SER.11
4pofA TOT.254 # CYS.4 MET.5 ILE.25 GLN.7 VAL.26 LYS.17 TRP.1 PRO.12 THR.9 PHE.12 ASN.10 GLY.14 HIS.6 LEU.18 ARG.16 ASP.18 ALA.10 GLU.28 TYR.4 SER.12
3robA TOT.127 # CYS.1 ASP.6 GLN.5 VAL.11 LYS.3 ILE.8 PRO.5 THR.8 PHE.7 ALA.14 GLY.8 HIS.4 ASN.2 LEU.11 ARG.13 TRP.2 GLU.11 TYR.2 SER.6
4uuyA TOT.317 # CYS.2 ASP.16 VAL.23 GLN.8 LYS.25 PRO.8 GLY.15 THR.24 PHE.19 ALA.5 HIS.8 MET.6 ILE.27 GLU.21 LEU.43 ARG.11 TRP.7 ASN.23 TYR.7 SER.19
3cecA TOT.84 # ILE.10 SER.3 GLN.5 LYS.2 PRO.3 THR.4 PHE.1 ASN.6 HIS.2 GLY.6 ASP.6 LEU.11 ARG.3 TRP.2 ALA.6 VAL.7 GLU.5 TYR.2
3gmvX TOT.156 # CYS.4 GLN.5 ILE.4 SER.14 VAL.6 LYS.8 ASN.3 PRO.7 THR.12 PHE.9 ALA.14 HIS.2 GLY.17 ASP.7 LEU.10 ARG.4 TRP.4 GLU.13 TYR.11 MET.2
3idsA TOT.356 # CYS.4 MET.9 HIS.11 ASN.14 GLN.8 LYS.22 ILE.18 PRO.12 THR.29 PHE.11 ALA.33 GLY.30 ASP.21 LEU.21 ARG.18 TRP.4 VAL.39 GLU.15 TYR.12 SER.25
1c8bA TOT.240 # CYS.1 GLN.3 ILE.23 SER.14 VAL.27 MET.7 ASN.11 PRO.10 LYS.10 THR.11 PHE.8 ALA.23 GLY.25 HIS.5 LEU.20 ARG.6 ASP.13 GLU.22 TYR.1
4utuA TOT.229 # CYS.4 ASP.15 GLN.6 VAL.15 MET.6 PRO.8 LYS.17 THR.14 PHE.4 ALA.20 HIS.8 GLY.16 ILE.22 GLU.18 LEU.20 ARG.9 ASN.8 TYR.5 SER.14
4ln9A TOT.281 # CYS.1 GLN.3 ASP.22 SER.16 VAL.35 LYS.2 ILE.4 PRO.20 THR.12 PHE.8 ALA.40 GLY.28 HIS.7 ASN.3 LEU.33 ARG.24 TRP.5 GLU.14 TYR.3 MET.1
3qjoA TOT.491 # CYS.7 GLN.10 ILE.31 SER.32 VAL.33 LYS.27 ASN.28 PRO.22 ASP.31 THR.22 PHE.30 ALA.28 GLY.26 HIS.29 LEU.40 ARG.21 TRP.6 GLU.34 TYR.23 MET.11
2p2rA TOT.72 # CYS.1 ILE.11 SER.8 GLN.6 LYS.2 ASN.4 PRO.2 THR.6 ALA.6 HIS.1 GLY.6 ASP.2 LEU.5 ARG.4 VAL.3 GLU.4 TYR.1
2yf2A TOT.56 # CYS.2 GLN.3 ASP.3 SER.3 VAL.7 LYS.5 ILE.4 PRO.1 THR.2 PHE.2 ALA.2 GLY.2 HIS.2 LEU.9 ARG.1 GLU.7 TYR.1
1li5A TOT.353 # CYS.5 GLN.7 HIS.16 SER.16 VAL.24 LYS.7 ILE.17 PRO.14 GLY.26 THR.16 PHE.19 ALA.36 MET.20 ASP.24 GLU.21 LEU.30 ARG.18 TRP.5 ASN.17 TYR.15
1fvuB TOT.121 # CYS.7 GLN.4 ASP.9 SER.8 VAL.7 LYS.7 ASN.4 PRO.4 THR.6 PHE.10 ALA.6 GLY.5 HIS.3 ILE.4 LEU.5 ARG.4 TRP.8 GLU.13 TYR.4 MET.3
4jduA TOT.184 # CYS.1 ILE.21 SER.18 GLN.8 LYS.6 PRO.7 THR.6 PHE.5 ASN.13 HIS.1 GLY.19 ASP.10 LEU.12 ARG.8 ALA.21 VAL.16 GLU.10 TYR.2
4r2yA TOT.63 # CYS.11 ASP.3 SER.1 GLN.5 VAL.3 LYS.4 PRO.4 HIS.5 PHE.3 ALA.2 GLY.4 ILE.2 GLU.3 LEU.3 ARG.2 TRP.3 ASN.2 MET.3
3bbyA TOT.183 # CYS.1 GLN.8 ILE.11 SER.11 VAL.10 LYS.6 ASN.3 PRO.11 THR.7 PHE.10 ALA.24 HIS.4 GLY.6 ASP.11 LEU.24 ARG.12 TRP.6 GLU.14 TYR.4
2yviA TOT.89 # ILE.6 SER.8 GLN.5 GLY.4 PRO.1 LYS.1 THR.2 PHE.1 GLU.12 HIS.1 MET.4 ASP.2 LEU.13 ARG.5 TRP.2 ALA.7 VAL.6 ASN.8 TYR.1
3wswA TOT.316 # CYS.1 MET.6 ASP.18 VAL.35 GLN.10 LYS.18 ASN.14 PRO.8 THR.25 PHE.6 ALA.25 HIS.7 GLY.26 ILE.22 LEU.26 ARG.12 TRP.4 GLU.26 TYR.10 SER.17
1inpA TOT.400 # CYS.8 ASP.20 SER.29 GLN.21 LYS.24 ASN.17 PRO.15 THR.21 PHE.14 ALA.28 HIS.8 GLY.33 ILE.27 LEU.43 ARG.14 TRP.5 VAL.28 GLU.30 TYR.9 MET.6
4x86B TOT.55 # ASP.2 SER.7 GLN.6 LYS.2 PRO.4 THR.1 ALA.7 GLY.2 ILE.1 LEU.7 ARG.6 VAL.2 GLU.7 TYR.1
4x86A TOT.44 # ASP.3 SER.6 GLN.3 LYS.1 THR.1 PHE.2 ALA.5 HIS.1 GLY.1 ILE.2 LEU.8 ARG.4 TRP.1 VAL.3 GLU.2 TYR.1
3noiA TOT.117 # CYS.2 ILE.4 SER.9 GLN.4 LYS.1 PRO.6 THR.5 PHE.6 ALA.8 HIS.4 GLY.13 ASP.4 GLU.8 LEU.12 ARG.11 TRP.2 VAL.12 ASN.4 TYR.2
3vibA TOT.190 # CYS.4 MET.3 ILE.17 GLN.5 VAL.6 LYS.12 ASN.9 PRO.2 THR.12 PHE.12 ALA.19 HIS.9 GLY.7 ASP.12 LEU.20 ARG.12 TRP.5 GLU.14 TYR.3 SER.7
1epfA TOT.189 # CYS.4 ASP.16 SER.13 GLN.10 LYS.16 PRO.7 THR.9 PHE.8 GLU.11 HIS.1 GLY.12 ILE.19 LEU.10 ARG.7 TRP.3 ALA.9 VAL.19 ASN.10 TYR.4 MET.1
4g22A TOT.399 # CYS.3 GLN.10 ASP.28 SER.29 VAL.25 MET.10 PRO.29 LYS.12 THR.18 PHE.23 ALA.34 HIS.9 GLY.34 ILE.23 GLU.18 LEU.40 ARG.21 TRP.6 ASN.12 TYR.15
2ey4C TOT.73 # MET.2 ASP.4 GLN.2 VAL.14 LYS.8 ILE.4 PRO.5 THR.1 PHE.3 ASN.3 GLY.5 HIS.1 LEU.6 ARG.4 TRP.1 ALA.2 GLU.2 TYR.4 SER.2
3k63A TOT.118 # ASP.9 SER.5 GLN.8 LYS.13 PRO.5 THR.4 PHE.7 GLU.6 HIS.1 GLY.8 ILE.9 LEU.13 ARG.1 ALA.3 VAL.4 ASN.13 TYR.9
2o3aA TOT.161 # CYS.1 GLN.2 ASP.12 SER.9 VAL.21 LYS.14 ASN.1 PRO.7 THR.5 PHE.9 ALA.10 HIS.4 GLY.11 ILE.10 LEU.16 ARG.11 TRP.2 GLU.11 TYR.4 MET.1
4p3gA TOT.215 # CYS.3 HIS.8 SER.14 GLN.7 LYS.17 TRP.2 PRO.6 THR.18 PHE.6 ALA.35 GLY.11 ILE.15 GLU.10 LEU.21 ARG.16 ASP.8 VAL.4 ASN.6 TYR.8
1xtpA TOT.231 # CYS.3 THR.19 GLN.4 ASP.16 SER.13 VAL.13 LYS.11 ASN.8 PRO.13 HIS.6 PHE.11 ALA.16 GLY.20 ILE.11 LEU.25 ARG.11 TRP.5 GLU.16 TYR.10
1xodA TOT.97 # CYS.1 GLN.3 ILE.3 SER.8 VAL.11 LYS.2 ASN.1 PRO.2 THR.6 PHE.5 ALA.6 HIS.3 GLY.11 ASP.7 LEU.10 ARG.10 TRP.2 GLU.3 TYR.2 MET.1
3qkgA TOT.164 # CYS.2 GLN.5 ILE.11 SER.11 VAL.10 GLY.12 ASN.6 PRO.5 LYS.11 THR.16 PHE.6 ALA.9 HIS.4 MET.5 ASP.8 LEU.10 ARG.9 TRP.4 GLU.12 TYR.8
3mozA TOT.314 # ILE.11 SER.14 GLN.13 LYS.21 ASN.7 PRO.17 THR.16 PHE.13 ALA.33 HIS.13 GLY.20 ASP.19 LEU.22 ARG.23 TRP.8 VAL.19 GLU.23 TYR.16 MET.6
4a2vA TOT.122 # CYS.5 GLN.5 ILE.8 SER.9 VAL.5 LYS.17 ASN.8 PRO.5 THR.5 PHE.8 ALA.3 HIS.4 GLY.4 ASP.8 LEU.7 ARG.3 TRP.2 GLU.6 TYR.5 MET.5
3donA TOT.264 # MET.5 ILE.33 VAL.16 GLN.8 LYS.18 PRO.11 THR.12 PHE.8 ASN.25 HIS.8 GLY.17 ASP.13 LEU.23 ARG.6 TRP.3 ALA.15 GLU.16 TYR.10 SER.17
4hktA TOT.323 # CYS.4 GLN.5 ILE.29 ASN.6 THR.17 LYS.14 PRO.12 HIS.6 PHE.13 ALA.56 GLY.25 ASP.27 LEU.15 ARG.24 VAL.26 GLU.19 TYR.8 SER.17
2x4iA TOT.105 # CYS.2 MET.1 GLN.4 ILE.15 SER.6 VAL.8 LYS.10 PRO.1 HIS.1 THR.6 GLU.10 GLY.3 ASP.6 LEU.11 ARG.2 ALA.2 ASN.8 TYR.3 PHE.6
3zldB TOT.30 # CYS.2 ILE.3 VAL.2 GLN.3 LYS.1 ASN.1 PRO.1 GLY.1 THR.1 PHE.1 ALA.3 MET.3 ASP.3 LEU.1 TRP.1 GLU.1 SER.2
1zunA TOT.192 # HIS.9 GLN.6 VAL.13 LYS.14 ILE.12 PRO.10 THR.6 PHE.11 ALA.14 GLY.11 ASP.13 ASN.8 LEU.17 ARG.13 TRP.4 GLU.14 TYR.7 SER.10
4lk4A TOT.326 # CYS.6 HIS.5 SER.35 GLN.19 LYS.7 GLY.28 PRO.11 ASP.18 THR.26 PHE.11 GLU.9 MET.1 ILE.20 LEU.28 ARG.14 TRP.4 ALA.31 VAL.23 ASN.15 TYR.15
3eirA TOT.243 # GLN.8 ILE.14 SER.18 VAL.15 LYS.15 PRO.10 GLY.14 THR.12 PHE.9 ASN.12 HIS.7 MET.5 ASP.22 LEU.30 ARG.15 TRP.2 ALA.16 GLU.12 TYR.7
2fpnA TOT.198 # CYS.1 ILE.11 VAL.14 GLN.15 LYS.16 ASN.11 PRO.5 THR.20 PHE.8 ALA.8 HIS.6 GLY.5 ASP.10 LEU.20 ARG.8 TRP.4 GLU.18 TYR.8 SER.10
4aqnA TOT.339 # GLN.9 ASP.26 SER.30 VAL.22 LYS.23 ILE.24 PRO.12 THR.18 PHE.17 ASN.25 GLY.24 HIS.6 LEU.30 ARG.19 TRP.2 ALA.14 GLU.19 TYR.13 MET.6
4nktA TOT.319 # CYS.4 HIS.6 SER.27 GLN.7 LYS.24 ILE.20 ASN.11 THR.12 PHE.22 ALA.18 GLY.18 ASP.16 LEU.40 ARG.18 TRP.2 PRO.15 VAL.15 GLU.21 TYR.17 MET.6
2wmfA TOT.554 # CYS.5 GLN.11 ILE.32 SER.38 VAL.28 LYS.36 TRP.20 PRO.28 THR.41 PHE.18 ASN.55 GLY.30 HIS.17 LEU.41 ARG.15 ASP.23 ALA.31 GLU.38 TYR.31 MET.16
1qd1A TOT.319 # CYS.7 GLN.15 ILE.10 SER.14 VAL.29 LYS.11 PRO.17 ASP.14 THR.12 PHE.13 ALA.35 GLY.23 HIS.6 GLU.27 LEU.40 ARG.22 TRP.3 ASN.10 TYR.8 MET.3
3wt4A TOT.425 # CYS.7 MET.3 ILE.20 GLN.12 VAL.26 LYS.6 PRO.21 THR.16 PHE.18 ALA.49 HIS.16 GLY.35 ASP.26 GLU.26 LEU.51 ARG.33 TRP.3 ASN.21 TYR.9 SER.27
2r2cA TOT.119 # GLN.4 ILE.8 SER.6 VAL.18 LYS.11 PRO.4 THR.7 PHE.5 GLU.8 HIS.2 GLY.6 ASP.6 LEU.8 ARG.1 TRP.2 ALA.7 ASN.7 TYR.9
1eteA TOT.134 # CYS.6 ASP.6 SER.11 GLN.13 LYS.5 PRO.7 THR.8 PHE.6 ASN.4 HIS.2 GLY.4 ILE.5 LEU.18 ARG.9 TRP.3 ALA.6 VAL.9 GLU.8 TYR.2 MET.2
4mhpA TOT.326 # CYS.6 GLN.12 ILE.15 SER.23 VAL.19 GLY.16 PRO.16 LYS.11 HIS.15 THR.13 GLU.23 MET.4 ASP.23 LEU.40 ARG.27 TRP.5 ALA.16 ASN.16 TYR.9 PHE.17
3ktcA TOT.324 # GLN.15 ILE.19 SER.13 VAL.23 LYS.13 ASN.14 PRO.17 THR.11 PHE.15 ALA.36 HIS.7 GLY.26 ASP.27 LEU.33 ARG.15 TRP.9 GLU.17 TYR.14
3jskA TOT.290 # CYS.1 ASP.19 SER.18 GLN.6 MET.13 ILE.15 PRO.13 LYS.11 THR.20 PHE.10 ALA.29 GLY.26 HIS.7 ASN.10 LEU.26 ARG.17 TRP.2 VAL.29 GLU.14 TYR.4
3ga1A TOT.113 # CYS.3 HIS.2 GLN.11 VAL.9 LYS.3 ASN.6 PRO.3 GLY.6 THR.3 PHE.7 ALA.9 MET.4 ILE.5 LEU.13 ARG.5 ASP.4 GLU.6 TYR.4 SER.10
3lqnA TOT.138 # CYS.1 GLN.5 ILE.13 SER.6 VAL.11 LYS.12 ASN.3 PRO.5 THR.3 PHE.6 ALA.8 HIS.4 GLY.8 ASP.8 LEU.19 ARG.4 GLU.13 TYR.3 MET.6
1mw7A TOT.220 # CYS.2 MET.5 ASP.15 GLN.4 VAL.8 LYS.20 PRO.7 THR.12 PHE.9 ALA.18 GLY.10 ILE.18 GLU.24 LEU.27 ARG.7 ASN.17 TYR.5 SER.12
4d3tA TOT.362 # CYS.4 GLN.9 HIS.12 SER.17 VAL.18 LYS.26 ILE.28 PRO.16 THR.16 PHE.12 ASN.15 GLY.22 ASP.23 LEU.27 ARG.20 TRP.11 ALA.31 GLU.36 TYR.15 MET.4
4wweI TOT.145 # GLN.4 ILE.9 SER.4 VAL.14 LYS.13 ASN.4 PRO.9 GLY.8 THR.7 ALA.15 HIS.2 MET.1 ASP.4 LEU.21 ARG.10 GLU.15 TYR.5
3buxB TOT.305 # CYS.4 GLN.12 HIS.7 SER.17 VAL.11 LYS.24 ASN.13 PRO.17 GLY.18 THR.19 PHE.21 ALA.15 MET.9 ASP.14 ILE.17 LEU.35 ARG.17 TRP.6 GLU.18 TYR.11
2uz1A TOT.548 # CYS.5 GLN.20 ASP.35 SER.27 VAL.46 MET.11 ILE.31 PRO.26 LYS.8 THR.29 PHE.15 ALA.86 GLY.56 HIS.20 GLU.20 LEU.60 ARG.26 TRP.7 ASN.11 TYR.9
3s79A TOT.452 # CYS.8 GLN.11 ILE.41 SER.25 VAL.28 LYS.33 ASN.19 PHE.25 PRO.19 HIS.11 THR.20 ALA.19 GLY.27 ASP.20 LEU.45 ARG.25 TRP.5 GLU.34 TYR.15 MET.22
2cb8A TOT.86 # ASP.5 VAL.3 GLN.2 GLY.6 PRO.2 LYS.13 THR.5 PHE.3 GLU.11 HIS.2 MET.3 ILE.4 LEU.5 ARG.2 TRP.2 ALA.8 ASN.3 TYR.4 SER.3
2qm0A TOT.259 # CYS.1 GLN.11 ILE.19 SER.19 VAL.18 LYS.21 PRO.12 HIS.8 THR.14 ALA.13 GLY.19 ASP.5 GLU.26 PHE.19 ARG.5 TRP.4 ASN.16 TYR.9 LEU.20
2ph7A TOT.206 # CYS.2 ASP.20 GLN.3 VAL.17 LYS.21 THR.8 ASN.5 HIS.4 PHE.17 ALA.12 GLY.12 ILE.16 LEU.15 ARG.10 TRP.1 PRO.7 GLU.19 TYR.11 SER.6
3lf9A TOT.107 # GLN.3 ILE.7 ASN.5 VAL.11 MET.2 PHE.1 LYS.9 HIS.4 THR.3 ALA.13 GLY.8 ASP.9 LEU.10 ARG.7 TRP.2 GLU.10 SER.3
1nvtA TOT.287 # ASP.18 SER.4 GLN.2 VAL.25 LYS.30 PRO.10 THR.10 PHE.8 ALA.29 HIS.4 GLY.25 ILE.36 GLU.22 LEU.21 ARG.5 TRP.1 ASN.19 TYR.9 MET.9
1tfzA TOT.364 # CYS.5 ILE.20 SER.35 GLN.10 GLY.34 ASN.12 PRO.20 LYS.16 THR.16 PHE.25 ALA.24 HIS.10 MET.7 ASP.20 LEU.33 ARG.19 TRP.2 VAL.24 GLU.22 TYR.10
1xx7A TOT.152 # GLN.3 ILE.14 SER.8 VAL.8 LYS.7 ASN.4 PRO.5 GLY.7 THR.4 PHE.3 ALA.16 HIS.2 MET.2 ASP.9 LEU.28 ARG.6 TRP.2 GLU.17 TYR.7
3iozB TOT.16 # GLN.4 ALA.1 GLY.2 GLU.1 LEU.3 ASN.3 TYR.2
3sp1A TOT.386 # CYS.8 MET.7 ILE.30 VAL.25 GLN.5 LYS.21 ASN.29 PRO.7 THR.16 PHE.35 ALA.20 HIS.10 GLY.17 ASP.28 LEU.43 ARG.13 TRP.6 GLU.24 TYR.20 SER.22
3zitA TOT.74 # CYS.2 ASP.6 GLN.4 VAL.9 LYS.6 THR.2 PRO.4 HIS.1 PHE.3 ALA.6 GLY.2 ILE.4 GLU.6 LEU.6 ARG.2 ASN.4 TYR.5 SER.2
3cghA TOT.492 # CYS.4 GLN.19 ASP.32 ASN.42 VAL.33 LYS.24 PRO.25 THR.31 PHE.19 ALA.56 HIS.5 GLY.37 ILE.28 LEU.27 ARG.17 TRP.12 GLU.26 TYR.27 SER.28
4fhrA TOT.182 # CYS.1 GLN.7 ASP.6 SER.14 VAL.13 LYS.4 PRO.12 GLY.8 THR.14 PHE.16 ASN.8 HIS.1 MET.7 ILE.17 LEU.17 ARG.8 TRP.3 ALA.5 GLU.17 TYR.4
4fhrB TOT.208 # ASP.14 VAL.16 GLN.9 GLY.7 ILE.18 PRO.8 LYS.16 THR.7 PHE.5 ASN.7 MET.6 HIS.2 LEU.27 ARG.15 ALA.17 GLU.25 TYR.2 SER.7
4x00A TOT.266 # CYS.1 GLN.9 HIS.8 SER.20 VAL.17 LYS.8 PHE.7 PRO.14 THR.9 TRP.4 ALA.35 GLY.20 ILE.13 GLU.13 LEU.33 ARG.16 ASP.20 ASN.5 TYR.10 MET.4
2vmhA TOT.147 # CYS.1 ILE.7 SER.14 GLN.3 LYS.12 ASN.4 PRO.1 THR.12 PHE.5 ALA.7 GLY.18 HIS.4 LEU.10 TRP.1 ASP.13 VAL.13 GLU.12 TYR.8 MET.2
2w58A TOT.187 # THR.6 GLN.7 ILE.12 SER.10 VAL.11 GLY.9 ASN.7 PRO.8 LYS.13 HIS.4 PHE.10 ALA.13 MET.8 ASP.10 LEU.21 ARG.15 TRP.1 GLU.13 TYR.9
4ktbA TOT.154 # CYS.2 GLN.7 ASP.10 ASN.2 VAL.17 LYS.2 ILE.5 PRO.15 THR.6 PHE.3 ALA.14 GLY.10 HIS.6 LEU.20 ARG.12 TRP.1 GLU.8 TYR.5 SER.9
3wdcA TOT.147 # GLN.10 ILE.11 SER.7 VAL.12 LYS.4 ASN.3 PRO.3 THR.5 PHE.3 ALA.11 GLY.16 HIS.6 LEU.22 ARG.11 ASP.1 GLU.17 TYR.3 MET.2
4jprA TOT.68 # CYS.2 GLN.3 ASP.6 SER.6 VAL.4 LYS.2 ILE.3 ASN.3 GLY.5 THR.4 PHE.3 ALA.6 MET.2 HIS.4 LEU.10 ARG.2 GLU.2 TYR.1
3zw5A TOT.127 # CYS.3 GLN.3 ILE.10 SER.6 VAL.9 LYS.10 PRO.9 GLY.7 THR.6 PHE.6 ASN.3 HIS.4 MET.7 ASP.8 LEU.11 ARG.6 ALA.5 GLU.11 TYR.3
4e0aA TOT.153 # CYS.2 ILE.11 VAL.14 GLN.10 LYS.7 PRO.5 THR.9 PHE.6 ALA.11 GLY.9 HIS.6 GLU.13 LEU.13 ARG.12 ASP.9 ASN.3 TYR.6 SER.7
3n4hA TOT.112 # CYS.1 ASP.2 VAL.6 GLN.5 MET.1 PRO.4 LYS.4 THR.8 PHE.2 ASN.4 HIS.4 GLY.4 ILE.13 LEU.9 ARG.8 TRP.3 ALA.11 GLU.12 TYR.4 SER.7
1wb4A TOT.283 # CYS.3 MET.8 GLN.9 ILE.14 ASN.21 VAL.14 LYS.11 TRP.4 PRO.16 THR.15 PHE.18 ALA.22 GLY.23 HIS.13 LEU.16 ARG.8 ASP.11 GLU.15 TYR.25 SER.17
4cabA TOT.507 # ILE.16 SER.22 GLN.33 LYS.21 PRO.31 THR.32 PHE.28 ALA.34 HIS.16 GLY.42 ASP.35 GLU.36 LEU.31 ARG.36 TRP.8 VAL.35 ASN.23 TYR.17 MET.11
2nx8A TOT.168 # CYS.4 GLN.9 ASP.5 SER.8 VAL.8 LYS.9 ASN.8 PRO.4 THR.6 PHE.6 ALA.15 HIS.6 GLY.12 ILE.15 LEU.14 ARG.10 TRP.1 GLU.17 TYR.4 MET.7
4q4fA TOT.394 # CYS.5 MET.7 ILE.33 GLN.10 VAL.30 LYS.22 PRO.20 THR.25 PHE.26 ALA.16 HIS.8 GLY.23 ASP.26 GLU.29 LEU.29 ARG.15 TRP.6 ASN.24 TYR.18 SER.22
4nn2A TOT.123 # CYS.9 MET.3 ASP.3 GLN.4 VAL.5 LYS.15 ASN.4 PRO.2 THR.8 PHE.5 ALA.9 HIS.6 GLY.11 ILE.7 LEU.6 ARG.6 GLU.8 TYR.6 SER.6
2bkrA TOT.201 # CYS.4 HIS.7 SER.21 GLN.10 LYS.7 ILE.9 PRO.9 THR.7 PHE.14 ALA.17 GLY.7 ASP.14 GLU.10 LEU.23 ARG.5 TRP.3 VAL.12 ASN.12 TYR.7 MET.3
3nl6A TOT.506 # CYS.10 ILE.45 SER.35 GLN.15 MET.12 ASN.23 PRO.22 LYS.24 THR.35 PHE.16 ALA.42 HIS.10 GLY.46 ASP.27 LEU.48 ARG.15 TRP.3 VAL.37 GLU.29 TYR.12
2zbcA TOT.78 # ILE.6 SER.6 VAL.14 LYS.8 ASN.2 PRO.1 THR.6 PHE.2 ALA.4 HIS.1 GLY.4 ASP.6 LEU.6 ARG.3 GLU.7 TYR.2
2ghvC TOT.183 # CYS.7 GLN.3 ILE.6 SER.12 VAL.15 LYS.10 PRO.12 THR.13 PHE.13 ALA.10 HIS.1 GLY.12 ASP.12 GLU.4 LEU.11 ARG.8 TRP.3 ASN.14 TYR.16 MET.1
2zyqA TOT.296 # CYS.5 GLN.5 ASP.22 ASN.5 VAL.23 GLY.29 ILE.7 PRO.16 LYS.5 THR.11 PHE.13 ALA.25 MET.12 HIS.11 LEU.31 ARG.29 TRP.5 GLU.22 TYR.7 SER.13
2zmeC TOT.99 # CYS.2 GLN.8 ILE.3 SER.10 VAL.6 LYS.8 ASN.4 PRO.6 GLY.1 THR.3 PHE.7 ALA.3 HIS.1 MET.3 ASP.2 LEU.13 ARG.6 TRP.5 GLU.7 TYR.1
4p1lA TOT.293 # CYS.2 GLN.14 ILE.15 SER.20 VAL.21 LYS.16 THR.8 PRO.17 PHE.9 TRP.5 ALA.30 GLY.20 HIS.6 GLU.30 LEU.21 ARG.10 ASP.21 ASN.15 TYR.13
3qflA TOT.108 # GLN.3 ILE.8 SER.4 VAL.9 LYS.16 TRP.1 PRO.2 THR.3 PHE.3 ASN.5 GLY.7 HIS.3 LEU.15 ARG.3 ASP.7 ALA.6 GLU.12 TYR.1
2c0hA TOT.353 # CYS.2 MET.12 ASP.16 VAL.17 GLN.16 LYS.17 PRO.8 THR.18 PHE.17 ALA.26 HIS.19 GLY.36 ILE.12 GLU.17 LEU.24 ARG.13 TRP.12 ASN.25 TYR.13 SER.33
4fz0M TOT.36 # CYS.6 ASP.2 SER.1 VAL.3 LYS.4 ILE.1 PRO.3 THR.1 PHE.1 ASN.1 GLY.3 HIS.1 LEU.1 ARG.3 TRP.2 GLU.3
4cxiA TOT.128 # CYS.3 GLN.10 ILE.6 SER.9 VAL.14 GLY.6 ASN.3 PRO.3 LYS.6 THR.6 PHE.7 ALA.12 MET.8 HIS.4 LEU.11 ARG.3 ASP.5 GLU.8 TYR.4
4bvqA TOT.364 # CYS.5 GLN.5 ASP.21 SER.31 VAL.32 LYS.7 PRO.16 THR.21 PHE.8 GLU.22 HIS.16 GLY.34 ILE.23 LEU.23 ARG.25 TRP.1 ALA.49 ASN.6 TYR.6 MET.13
4mi5A TOT.199 # CYS.21 MET.2 ILE.11 GLN.11 VAL.10 LYS.11 THR.4 PRO.10 HIS.4 PHE.12 ALA.14 GLY.12 ASP.11 GLU.9 LEU.10 ARG.12 TRP.1 ASN.13 TYR.7 SER.14
4lzhA TOT.272 # CYS.1 ILE.20 GLN.15 VAL.25 LYS.10 PRO.25 THR.21 PHE.6 ASN.19 HIS.5 GLY.24 ASP.12 LEU.21 ARG.11 TRP.2 ALA.20 GLU.13 TYR.12 SER.10
1kdgA TOT.541 # CYS.2 ILE.29 SER.49 GLN.25 LYS.15 PRO.41 ASP.27 THR.44 PHE.22 ALA.49 GLY.53 HIS.7 GLU.8 LEU.41 ARG.16 TRP.12 VAL.40 ASN.36 TYR.19 MET.6
1r8eA TOT.271 # CYS.1 ASP.14 SER.20 GLN.12 LYS.19 PRO.12 THR.16 PHE.12 ASN.8 HIS.4 GLY.8 ILE.27 LEU.24 ARG.12 ALA.15 VAL.12 GLU.26 TYR.22 MET.7
1lo6A TOT.214 # CYS.12 MET.2 GLN.11 ILE.11 SER.15 VAL.12 LYS.9 ASN.7 PRO.13 HIS.12 THR.11 ALA.14 GLY.19 ASP.13 LEU.23 ARG.8 TRP.4 GLU.9 TYR.7 PHE.2
2rklA TOT.53 # ILE.5 SER.4 GLN.2 LYS.7 PRO.1 GLY.1 THR.4 ALA.6 MET.1 ASP.5 GLU.4 LEU.8 ARG.1 ASN.2 TYR.2
3sg8A TOT.285 # CYS.3 GLN.7 ASP.21 SER.18 VAL.9 LYS.22 PRO.13 THR.12 PHE.20 ALA.9 HIS.7 GLY.14 ILE.29 GLU.22 LEU.25 ARG.8 TRP.2 ASN.20 TYR.16 MET.8
4jqpA TOT.320 # CYS.4 ILE.27 SER.8 GLN.9 LYS.10 ASN.6 PHE.6 PRO.14 HIS.11 THR.16 ALA.36 GLY.40 ASP.19 LEU.30 ARG.18 VAL.30 GLU.21 TYR.8 MET.7
3smtA TOT.412 # CYS.6 GLN.16 ILE.19 SER.33 VAL.25 LYS.14 ASN.17 PRO.16 ASP.23 THR.25 PHE.25 ALA.33 GLY.19 HIS.8 LEU.46 ARG.23 TRP.8 GLU.36 TYR.20
4n9wA TOT.350 # CYS.2 GLN.9 ASP.26 SER.22 VAL.42 LYS.8 ASN.3 PRO.20 THR.10 PHE.11 ALA.47 GLY.33 HIS.11 ILE.17 LEU.34 ARG.19 TRP.2 GLU.16 TYR.10 MET.8
1r61A TOT.205 # CYS.1 ILE.15 GLN.4 VAL.16 MET.5 ASN.5 PRO.11 LYS.13 THR.15 PHE.12 ALA.19 GLY.15 HIS.8 LEU.16 ARG.10 ASP.18 GLU.13 TYR.6 SER.3
4fvqA TOT.257 # CYS.7 GLN.7 ILE.19 SER.15 VAL.13 LYS.13 THR.10 PRO.13 GLY.14 HIS.9 PHE.13 ALA.15 MET.3 ASP.15 GLU.20 LEU.33 ARG.10 TRP.4 ASN.18 TYR.6
4fe3A TOT.291 # CYS.5 ASP.19 SER.15 GLN.11 VAL.26 LYS.26 PRO.7 THR.9 PHE.13 GLU.23 HIS.8 GLY.20 ILE.23 LEU.30 ARG.9 TRP.1 ALA.11 ASN.16 TYR.11 MET.8
2onfA TOT.136 # CYS.2 GLN.2 ILE.10 SER.10 VAL.12 LYS.8 ASN.5 PRO.8 THR.5 PHE.8 ALA.5 HIS.5 GLY.9 ASP.9 LEU.9 ARG.8 TRP.2 GLU.15 TYR.4
4depC TOT.265 # CYS.10 GLN.5 ILE.18 SER.15 VAL.21 LYS.13 ASN.17 PRO.17 GLY.12 THR.24 PHE.14 ALA.11 MET.6 HIS.7 LEU.20 ARG.13 TRP.7 ASP.10 GLU.14 TYR.11
2d7cC TOT.40 # GLN.3 ILE.7 SER.2 VAL.3 LYS.2 PRO.1 THR.1 PHE.1 GLU.6 ASP.3 LEU.3 ARG.3 ALA.2 ASN.2 TYR.1
2xq0A TOT.625 # CYS.6 ILE.36 SER.47 GLN.25 GLY.25 TRP.13 PRO.31 LYS.44 THR.38 PHE.44 ALA.35 MET.8 HIS.18 ASN.32 LEU.61 ARG.25 ASP.45 VAL.32 GLU.38 TYR.22
3nuhB TOT.344 # CYS.2 ASP.23 VAL.18 GLN.20 LYS.19 ASN.9 PRO.14 THR.22 PHE.8 ALA.29 HIS.8 GLY.24 ILE.19 LEU.39 ARG.25 TRP.4 GLU.31 TYR.13 SER.17
1l3lA TOT.221 # CYS.1 HIS.11 SER.11 GLN.5 LYS.15 TRP.5 PRO.6 THR.18 PHE.11 ALA.28 GLY.11 ILE.19 GLU.12 LEU.16 ARG.15 ASP.16 VAL.11 ASN.3 TYR.7
4nboA TOT.102 # CYS.2 ASP.8 SER.8 GLN.6 LYS.6 ILE.4 PRO.2 THR.2 PHE.1 ALA.8 GLY.4 HIS.4 LEU.13 ARG.10 TRP.3 VAL.10 GLU.7 MET.4
3pjxA TOT.423 # CYS.2 MET.6 ASP.19 VAL.18 GLN.33 LYS.9 ASN.12 PRO.13 THR.15 PHE.15 ALA.47 GLY.34 HIS.8 ILE.14 LEU.68 ARG.34 TRP.5 GLU.37 TYR.9 SER.25
2wzoA TOT.146 # CYS.7 MET.3 GLN.7 ASP.9 SER.10 VAL.8 LYS.6 ILE.12 PRO.12 THR.7 PHE.7 ALA.10 GLY.13 HIS.4 ASN.4 ARG.5 TRP.1 GLU.5 TYR.6 LEU.10
3cjpA TOT.262 # CYS.2 GLN.5 ASP.14 SER.19 VAL.22 LYS.21 PRO.12 THR.12 PHE.9 GLU.15 HIS.6 GLY.16 ILE.28 LEU.26 ARG.5 TRP.2 ALA.13 ASN.20 TYR.7 MET.8
1h4rA TOT.294 # CYS.4 ASP.18 SER.9 VAL.17 GLN.10 LYS.28 ASN.11 PRO.11 THR.14 PHE.17 ALA.17 HIS.7 GLY.11 ILE.17 LEU.32 ARG.16 TRP.6 GLU.27 TYR.13 MET.9
1cb0A TOT.268 # CYS.9 HIS.7 SER.16 GLN.7 LYS.17 PRO.13 ASP.13 THR.22 PHE.8 ASN.8 GLY.19 ILE.22 LEU.21 ARG.13 TRP.4 ALA.20 VAL.19 GLU.17 TYR.5 MET.8
1qfhA TOT.205 # PRO.12 CYS.1 GLN.2 ASP.14 SER.9 VAL.21 LYS.14 ILE.9 ASN.16 THR.18 PHE.11 ALA.18 GLY.26 HIS.2 LEU.7 ARG.4 GLU.13 TYR.7 MET.1
3qs2A TOT.170 # ASP.12 SER.16 GLN.6 LYS.6 PRO.3 THR.28 PHE.7 ALA.18 GLY.18 ILE.7 GLU.3 LEU.13 ARG.2 TRP.3 VAL.13 ASN.10 TYR.4 MET.1
3f3qA TOT.109 # CYS.2 ILE.5 SER.4 GLN.6 LYS.10 ASN.4 PRO.5 GLY.4 THR.4 PHE.6 ALA.16 MET.4 HIS.6 LEU.6 ASP.7 TRP.1 VAL.10 GLU.6 TYR.3
4akxA TOT.119 # GLN.4 ASP.9 SER.7 VAL.11 LYS.1 ASN.3 PRO.9 THR.3 PHE.2 ALA.10 HIS.2 GLY.10 ILE.2 LEU.25 ARG.9 TRP.4 GLU.8
1qgnA TOT.396 # CYS.7 GLN.10 ILE.27 SER.25 VAL.27 LYS.21 ASN.14 PRO.16 THR.26 PHE.18 ALA.38 HIS.13 GLY.31 ASP.22 LEU.45 ARG.15 TRP.1 GLU.20 TYR.11 MET.9
2cdqA TOT.470 # CYS.5 GLN.13 ILE.38 SER.34 VAL.41 LYS.29 ASN.14 PRO.15 GLY.33 THR.35 PHE.17 ALA.36 HIS.7 MET.11 ASP.21 LEU.52 ARG.18 TRP.4 GLU.36 TYR.11
4dvqA TOT.463 # CYS.6 GLN.26 ASP.13 SER.25 VAL.30 LYS.16 ILE.18 PRO.29 THR.18 PHE.26 ALA.33 GLY.22 HIS.19 ASN.15 LEU.71 ARG.32 TRP.8 GLU.30 TYR.12 MET.14
4huqS TOT.164 # ILE.14 VAL.23 GLN.7 MET.7 PRO.6 LYS.4 THR.12 PHE.10 ALA.11 GLY.10 ASP.2 GLU.1 LEU.26 ARG.5 TRP.7 ASN.5 TYR.4 SER.10
4huqT TOT.245 # CYS.1 ILE.21 GLN.8 VAL.18 LYS.8 PRO.9 GLY.13 THR.14 PHE.17 ALA.19 HIS.2 MET.11 ASP.10 GLU.5 LEU.41 ARG.15 TRP.5 ASN.6 TYR.6 SER.16
4ivgA TOT.477 # CYS.3 ILE.26 SER.43 GLN.22 LYS.32 ASN.13 PRO.14 THR.23 PHE.27 ALA.34 HIS.10 GLY.22 ASP.29 LEU.47 ARG.30 TRP.4 VAL.29 GLU.38 TYR.18 MET.13
3e57A TOT.180 # GLN.2 ASP.10 SER.9 VAL.16 LYS.11 ASN.5 PRO.2 THR.7 PHE.17 ALA.6 HIS.2 GLY.16 ILE.8 LEU.22 ARG.12 TRP.2 GLU.26 TYR.4 MET.3
4huqB TOT.275 # ASP.17 SER.17 GLN.23 GLY.20 ASN.7 PRO.12 LYS.6 THR.20 PHE.8 ALA.25 HIS.4 MET.7 ILE.19 LEU.27 ARG.14 TRP.4 VAL.23 GLU.19 TYR.3
4huqA TOT.284 # HIS.8 SER.8 GLN.26 LYS.8 ASN.5 PRO.15 THR.23 PHE.13 ALA.32 GLY.19 ASP.17 ILE.10 LEU.31 ARG.16 TRP.2 VAL.18 GLU.16 TYR.6 MET.11
2rbgA TOT.123 # CYS.2 ILE.12 VAL.9 GLN.2 LYS.13 PRO.1 THR.6 PHE.8 ASN.12 GLY.3 ASP.9 LEU.16 ARG.5 TRP.1 ALA.2 GLU.10 TYR.5 SER.7
1jkgA TOT.139 # CYS.4 GLN.9 ILE.4 SER.14 VAL.14 MET.3 PRO.4 LYS.5 THR.10 PHE.10 ALA.11 HIS.1 GLY.5 ASP.8 GLU.8 LEU.8 ARG.7 TRP.3 ASN.7 TYR.4
3a1qC TOT.45 # ILE.1 SER.4 GLN.3 LYS.3 ASN.3 PRO.1 GLY.2 PHE.1 ALA.5 MET.1 LEU.6 ARG.2 VAL.1 GLU.12
1ylxA TOT.94 # GLN.3 ILE.7 SER.3 VAL.7 LYS.6 TRP.1 PRO.3 THR.4 PHE.5 GLU.17 GLY.8 HIS.4 LEU.5 ARG.5 ASP.5 ALA.4 ASN.3 TYR.4
4pf4A TOT.273 # CYS.1 ILE.22 SER.15 GLN.9 LYS.21 ASN.12 PRO.11 GLY.15 THR.14 PHE.16 ALA.15 HIS.7 MET.4 ASP.16 LEU.28 ARG.11 TRP.2 VAL.18 GLU.26 TYR.10
3zeuB TOT.328 # CYS.3 GLN.7 HIS.6 SER.15 VAL.25 MET.11 ILE.13 PRO.18 LYS.11 THR.20 PHE.14 ALA.44 GLY.35 ASP.19 ASN.7 LEU.35 ARG.18 TRP.2 GLU.17 TYR.8
4mggA TOT.369 # CYS.6 HIS.7 GLN.7 VAL.26 MET.7 ILE.27 PRO.18 LYS.16 THR.23 PHE.9 ALA.39 GLY.33 ASP.26 ASN.12 LEU.34 ARG.19 TRP.4 GLU.22 TYR.13 SER.21
3zeuA TOT.215 # CYS.3 ILE.12 SER.9 GLN.9 GLY.24 ASN.4 PRO.10 LYS.4 THR.14 PHE.3 ALA.34 HIS.4 MET.5 ASP.7 LEU.23 ARG.9 TRP.8 VAL.15 GLU.15 TYR.3
4lduA TOT.336 # CYS.7 GLN.14 ASP.17 SER.29 VAL.26 MET.9 PRO.26 LYS.12 THR.20 PHE.15 ALA.23 HIS.12 GLY.21 ILE.11 GLU.15 LEU.29 ARG.24 TRP.7 ASN.10 TYR.9
4d0eA TOT.122 # CYS.18 ILE.6 SER.5 GLN.7 GLY.11 ASN.8 PRO.6 LYS.2 THR.6 PHE.4 ALA.4 HIS.6 MET.1 ASP.8 LEU.9 ARG.2 VAL.6 GLU.11 TYR.2
4d7sA TOT.190 # CYS.1 GLN.4 ASP.10 SER.7 VAL.11 LYS.7 ASN.1 PRO.8 THR.7 PHE.9 ALA.16 HIS.4 GLY.11 ILE.16 LEU.22 ARG.20 TRP.1 GLU.22 TYR.10 MET.3
4l5rC TOT.190 # GLN.4 HIS.6 SER.13 VAL.13 LYS.27 TRP.1 PRO.6 THR.13 PHE.12 GLU.12 GLY.10 ILE.16 LEU.11 ARG.3 ASP.7 ALA.9 ASN.16 TYR.6 MET.5
3ntnA TOT.211 # HIS.8 GLN.8 VAL.17 LYS.14 THR.18 PHE.3 GLU.10 GLY.33 ILE.10 LEU.11 ARG.3 ASP.10 ALA.25 ASN.24 TYR.2 SER.15
1u5uA TOT.366 # CYS.1 GLN.8 ASP.25 SER.17 VAL.19 LYS.30 ASN.13 PRO.23 THR.21 PHE.21 ALA.25 HIS.10 GLY.24 ILE.19 LEU.30 ARG.21 TRP.6 GLU.33 TYR.18 MET.2
1pn0A TOT.650 # CYS.9 MET.15 ILE.42 GLN.24 VAL.43 LYS.39 PRO.28 THR.38 PHE.26 ALA.47 HIS.21 GLY.43 ASP.49 GLU.46 LEU.41 ARG.42 TRP.9 ASN.20 TYR.24 SER.44
2owmA TOT.314 # CYS.4 GLN.8 ILE.16 SER.25 VAL.28 LYS.11 PRO.17 GLY.16 THR.26 PHE.10 ALA.20 HIS.8 MET.7 ASP.19 GLU.23 LEU.26 ARG.23 TRP.3 ASN.10 TYR.14
2qbuA TOT.228 # CYS.5 GLN.2 ILE.11 SER.18 VAL.27 LYS.4 ASN.2 PRO.9 GLY.18 THR.13 PHE.8 ALA.17 HIS.3 MET.8 ASP.21 LEU.18 ARG.22 TRP.1 GLU.18 TYR.3
4dpgI TOT.26 # CYS.1 HIS.2 GLN.1 VAL.2 GLY.4 PRO.5 THR.1 ALA.1 MET.2 LEU.2 ARG.1 ASN.1 TYR.3
1cjxA TOT.351 # CYS.1 GLN.11 ILE.24 ASN.15 VAL.17 MET.13 PHE.24 PRO.18 LYS.16 HIS.8 THR.13 ALA.22 GLY.37 ASP.19 LEU.32 ARG.19 TRP.2 GLU.30 TYR.14 SER.16
2pkdA TOT.107 # GLN.4 ASP.6 SER.5 VAL.10 LYS.4 ASN.7 PRO.6 THR.12 PHE.2 ALA.7 HIS.2 GLY.5 ILE.9 LEU.5 ARG.7 TRP.1 GLU.6 TYR.8 MET.1
2ccqA TOT.99 # CYS.2 ASP.3 SER.6 GLN.3 LYS.5 PRO.5 THR.6 PHE.5 ASN.5 HIS.1 GLY.5 ILE.7 LEU.12 ARG.7 ALA.9 VAL.4 GLU.11 TYR.2 MET.1
2fsrA TOT.168 # CYS.2 GLN.3 ASP.9 SER.8 VAL.7 LYS.2 ASN.5 PRO.13 THR.9 PHE.8 ALA.16 HIS.6 GLY.18 ILE.6 LEU.20 ARG.12 TRP.4 GLU.12 TYR.8
4rg3A TOT.497 # CYS.2 GLN.9 ASP.30 SER.23 VAL.43 MET.5 ILE.28 PRO.27 LYS.9 THR.40 PHE.28 ALA.47 GLY.49 HIS.13 GLU.27 LEU.35 ARG.28 TRP.12 ASN.22 TYR.20
1uf5A TOT.303 # CYS.4 GLN.11 ILE.15 SER.9 VAL.20 LYS.12 TRP.4 PRO.17 THR.16 PHE.16 GLU.25 GLY.26 HIS.13 LEU.27 ARG.20 ASP.12 ALA.28 ASN.9 TYR.10 MET.9
3dsoA TOT.66 # GLN.1 ASP.6 SER.3 VAL.6 LYS.9 ASN.4 PRO.1 THR.3 PHE.3 ALA.1 HIS.1 GLY.7 ILE.3 LEU.3 ARG.2 GLU.5 TYR.1 MET.7
1yg2A TOT.167 # CYS.2 ASP.6 SER.11 GLN.12 VAL.13 LYS.5 ILE.6 PRO.5 THR.9 PHE.4 ASN.4 GLY.6 HIS.4 LEU.20 ARG.11 TRP.4 ALA.20 GLU.15 TYR.7 MET.3
3a2qA TOT.482 # CYS.5 GLN.16 ASP.27 SER.31 ASN.15 VAL.40 LYS.10 PRO.28 THR.24 PHE.12 ALA.66 HIS.7 GLY.48 ILE.22 LEU.44 ARG.31 TRP.9 GLU.30 TYR.9 MET.8
4cc0A TOT.306 # CYS.30 GLN.17 ILE.11 SER.20 VAL.11 MET.4 PRO.18 LYS.13 THR.15 PHE.11 GLU.14 HIS.7 GLY.36 ASP.18 LEU.15 ARG.15 TRP.7 ALA.9 ASN.22 TYR.13
4ep8B TOT.101 # CYS.1 GLN.5 HIS.5 SER.1 VAL.11 LYS.3 PRO.7 THR.3 PHE.6 GLU.7 GLY.12 ILE.4 LEU.5 ARG.9 ASP.2 ALA.11 ASN.4 TYR.3 MET.2
1uozA TOT.300 # CYS.4 GLN.8 ASP.19 SER.19 VAL.17 LYS.2 ILE.10 PRO.22 THR.19 PHE.7 ALA.51 GLY.34 HIS.7 GLU.10 LEU.18 ARG.18 TRP.5 ASN.13 TYR.13 MET.4
4i7aA TOT.78 # CYS.1 MET.1 ASP.4 VAL.15 GLN.2 LYS.3 ASN.2 PRO.1 THR.8 ALA.5 GLY.9 ILE.6 LEU.6 ARG.2 GLU.3 TYR.1 SER.9
1dunA TOT.120 # CYS.2 ASP.8 SER.7 GLN.9 LYS.10 PRO.6 THR.6 PHE.3 GLU.6 HIS.2 GLY.11 ILE.17 LEU.7 ARG.2 TRP.2 ALA.4 VAL.6 ASN.6 TYR.3 MET.3
5ailA TOT.174 # CYS.3 ILE.14 SER.11 GLN.8 LYS.14 PRO.6 ARG.1 GLY.6 THR.11 PHE.10 ASN.8 MET.7 HIS.7 LEU.16 TRP.2 ASP.5 ALA.13 VAL.16 GLU.13 TYR.3
1vjoA TOT.366 # CYS.5 GLN.12 HIS.9 SER.21 VAL.31 LYS.9 ILE.16 PRO.19 THR.19 PHE.7 ALA.32 GLY.35 ASP.14 GLU.27 LEU.52 ARG.24 TRP.8 ASN.15 TYR.11
4aqsA TOT.443 # CYS.38 ASP.30 SER.28 ASN.22 GLN.10 LYS.22 THR.22 PRO.24 HIS.16 PHE.19 ALA.21 GLY.36 ILE.21 LEU.28 ARG.21 TRP.4 VAL.23 GLU.29 TYR.20 MET.9
4b8cD TOT.283 # CYS.6 GLN.10 ILE.15 SER.21 VAL.10 MET.5 ASN.22 PRO.21 LYS.7 THR.18 PHE.20 ALA.15 HIS.6 GLY.10 ASP.16 LEU.45 ARG.4 TRP.6 GLU.12 TYR.14
4nyqA TOT.153 # CYS.4 GLN.3 HIS.6 SER.9 VAL.10 LYS.12 ILE.6 PRO.11 THR.10 PHE.6 ALA.8 GLY.8 ASP.10 GLU.8 LEU.12 ARG.6 TRP.1 ASN.7 TYR.15 MET.1
4fr2A TOT.313 # CYS.2 MET.8 ILE.19 GLN.6 VAL.23 LYS.14 PRO.19 THR.19 PHE.10 ALA.40 HIS.6 GLY.31 ASP.20 GLU.19 LEU.28 ARG.7 TRP.1 ASN.20 TYR.9 SER.12
1y0pA TOT.568 # CYS.8 GLN.13 ILE.26 SER.36 VAL.48 MET.17 TRP.4 PRO.17 LYS.41 THR.34 PHE.12 ALA.65 GLY.61 HIS.18 GLU.31 LEU.37 ARG.18 ASP.38 ASN.28 TYR.16
4eysA TOT.334 # CYS.4 ASP.32 SER.21 GLN.10 LYS.21 PRO.14 THR.17 PHE.20 ALA.15 HIS.12 GLY.24 ILE.29 GLU.23 LEU.44 ARG.9 TRP.2 VAL.15 ASN.10 TYR.12
1vrbA TOT.235 # GLN.11 ILE.14 SER.12 VAL.17 LYS.6 PRO.18 ASP.9 THR.15 PHE.14 ALA.22 GLY.13 HIS.3 GLU.6 LEU.36 ARG.7 TRP.7 ASN.14 TYR.11
2acvA TOT.461 # CYS.6 ILE.37 SER.36 VAL.34 GLN.17 LYS.32 PRO.26 THR.10 PHE.25 ALA.23 HIS.10 GLY.35 ASP.30 GLU.29 LEU.53 ARG.10 TRP.8 ASN.18 TYR.11 MET.11
4o1wA TOT.78 # CYS.2 ASP.4 SER.4 GLN.2 LYS.7 PRO.4 GLY.7 THR.3 PHE.1 ALA.16 MET.6 HIS.1 GLU.2 LEU.5 ARG.1 VAL.4 ASN.5 TYR.4
1o59A TOT.311 # PRO.12 CYS.3 GLN.7 HIS.13 SER.19 VAL.26 LYS.18 ILE.28 ASN.10 THR.12 PHE.17 ALA.18 GLY.30 ASP.20 LEU.17 ARG.19 TRP.9 GLU.24 TYR.9
2hzcA TOT.87 # GLN.7 ILE.6 SER.3 VAL.4 MET.4 PRO.5 LYS.2 THR.4 PHE.8 ALA.8 GLY.9 ASP.4 GLU.4 LEU.7 ARG.6 ASN.5 TYR.1
4o8mA TOT.303 # PRO.17 GLN.12 ASP.19 SER.21 VAL.25 LYS.24 ILE.20 ASN.15 GLY.22 THR.16 PHE.15 ALA.19 MET.8 HIS.8 LEU.27 ARG.4 TRP.4 GLU.20 TYR.7
3pmeA TOT.415 # CYS.4 GLN.13 ASP.26 SER.38 VAL.18 LYS.31 PRO.7 THR.21 PHE.17 GLU.20 HIS.7 GLY.18 ILE.49 LEU.32 ARG.12 TRP.9 ALA.11 ASN.44 TYR.29 MET.9
1useA TOT.38 # ASP.2 GLN.4 VAL.4 LYS.4 PHE.1 ALA.1 ILE.2 LEU.5 ARG.3 GLU.8 TYR.1 SER.3
3ubfA TOT.287 # ILE.20 SER.14 GLN.13 VAL.25 LYS.17 PRO.17 THR.25 PHE.14 GLU.22 HIS.3 GLY.18 ASP.26 LEU.16 ARG.15 TRP.3 ALA.15 ASN.12 TYR.9 MET.3
4mf5A TOT.237 # HIS.3 SER.9 VAL.12 GLN.12 LYS.11 ASN.8 PRO.21 THR.8 PHE.14 ALA.20 GLY.20 ILE.15 LEU.24 ARG.13 TRP.4 ASP.13 GLU.15 TYR.9 MET.6
1qtwA TOT.285 # CYS.6 ILE.22 VAL.10 GLN.12 GLY.20 PRO.7 LYS.13 THR.17 PHE.14 ALA.38 HIS.12 MET.5 ASP.19 GLU.20 LEU.23 ARG.14 TRP.4 ASN.10 TYR.6 SER.13
4ilvA TOT.155 # CYS.1 MET.3 HIS.3 VAL.11 GLN.6 LYS.3 ILE.2 PRO.17 THR.17 PHE.11 ALA.11 GLY.18 ASP.11 GLU.3 LEU.13 ARG.10 TRP.1 ASN.2 TYR.5 SER.7
4krwA TOT.67 # MET.1 ASP.3 GLN.2 VAL.4 LYS.2 PRO.2 THR.2 PHE.1 ALA.4 GLY.8 ILE.9 GLU.7 LEU.9 ARG.8 ASN.1 TYR.1 SER.3
3m9qA TOT.86 # CYS.1 GLN.3 HIS.3 SER.3 VAL.6 LYS.7 ILE.2 PRO.3 THR.4 PHE.4 ASN.3 GLY.3 ASP.4 LEU.9 ARG.9 TRP.1 ALA.6 GLU.10 TYR.5
3n3uA TOT.291 # GLN.12 ILE.20 SER.20 VAL.18 LYS.28 ASN.17 PRO.13 THR.18 PHE.13 ALA.23 HIS.3 GLY.12 ASP.14 LEU.28 ARG.11 GLU.33 TYR.5 MET.3
3db2A TOT.322 # CYS.5 GLN.7 ASP.16 SER.19 VAL.34 LYS.18 ILE.21 ASN.15 THR.17 PHE.12 ALA.28 GLY.26 HIS.8 LEU.27 ARG.19 TRP.4 PRO.10 GLU.26 TYR.10
4aweA TOT.381 # CYS.2 HIS.8 VAL.23 GLN.11 LYS.25 ILE.13 PRO.10 GLY.44 THR.27 PHE.19 GLU.26 MET.7 ASP.32 LEU.22 ARG.17 TRP.13 ALA.28 ASN.20 TYR.21 SER.13
1o04A TOT.494 # CYS.8 ILE.25 GLN.25 VAL.46 MET.9 PRO.24 LYS.29 THR.27 PHE.24 ASN.21 HIS.6 GLY.46 ASP.28 LEU.33 ARG.20 TRP.7 ALA.49 GLU.27 TYR.17 SER.23
4jhgA TOT.163 # CYS.2 GLN.2 ASP.11 SER.11 VAL.10 LYS.13 ASN.3 PRO.8 THR.12 PHE.9 ALA.8 HIS.1 GLY.14 ILE.13 LEU.12 ARG.4 GLU.18 TYR.10 MET.2
3kpeA TOT.47 # GLN.1 ILE.3 SER.6 VAL.6 LYS.6 PRO.1 THR.2 ALA.2 GLY.2 ASP.2 GLU.2 LEU.9 ASN.4 TYR.1
1dmlA TOT.267 # CYS.4 ILE.6 VAL.27 GLN.14 MET.3 PRO.14 LYS.8 THR.29 PHE.16 ALA.21 HIS.3 GLY.18 ASP.9 GLU.12 LEU.34 ARG.19 TRP.2 ASN.8 TYR.3 SER.17
3i47A TOT.259 # CYS.3 GLN.10 ASP.13 SER.21 VAL.17 MET.8 PRO.7 LYS.15 THR.11 PHE.10 ALA.31 HIS.4 GLY.13 ILE.16 GLU.16 LEU.28 ARG.10 TRP.2 ASN.17 TYR.7
2ozuA TOT.253 # CYS.12 GLN.14 ILE.15 SER.18 VAL.12 LYS.21 ASN.7 PRO.13 GLY.11 HIS.10 PHE.10 THR.8 MET.6 ASP.10 LEU.32 ARG.13 TRP.4 ALA.5 GLU.13 TYR.19
4i98B TOT.164 # GLN.8 ILE.15 SER.12 VAL.7 LYS.12 PRO.8 THR.8 PHE.4 ALA.16 HIS.1 GLY.10 ASP.9 GLU.12 LEU.24 ARG.7 ASN.4 TYR.7
4i98A TOT.136 # ILE.7 SER.7 GLN.8 LYS.12 ASN.1 PRO.4 THR.6 PHE.5 ALA.9 HIS.4 GLY.4 ASP.9 LEU.23 ARG.4 VAL.8 GLU.16 TYR.9
3eojA TOT.343 # CYS.2 GLN.10 ASP.19 SER.28 VAL.35 LYS.10 PRO.17 GLY.40 THR.14 PHE.17 ALA.21 HIS.8 MET.4 ILE.24 GLU.18 LEU.20 ARG.19 TRP.8 ASN.19 TYR.10
4h3dA TOT.252 # CYS.4 GLN.4 ILE.27 SER.13 VAL.22 MET.8 ASN.14 PRO.8 LYS.26 THR.9 PHE.11 ALA.11 HIS.4 GLY.14 ASP.14 LEU.23 ARG.10 TRP.1 GLU.24 TYR.5
1yspA TOT.164 # CYS.1 ILE.14 SER.11 GLN.7 GLY.10 ASN.2 PRO.4 LYS.6 THR.9 PHE.4 ALA.11 HIS.3 MET.5 ASP.10 LEU.17 ARG.15 TRP.1 VAL.11 GLU.17 TYR.6
2iqyA TOT.190 # CYS.2 ASP.16 GLN.8 VAL.16 GLY.16 PRO.15 LYS.13 THR.8 PHE.5 GLU.10 HIS.6 MET.3 ILE.4 LEU.18 ARG.7 TRP.5 ALA.10 ASN.7 TYR.6 SER.15
4n2kA TOT.619 # CYS.12 GLN.17 ASP.37 SER.40 VAL.56 LYS.34 ILE.34 PRO.34 THR.32 PHE.34 ALA.29 GLY.47 HIS.13 ASN.20 LEU.62 ARG.26 TRP.11 GLU.41 TYR.23 MET.17
3hp4A TOT.182 # GLN.10 ILE.12 SER.13 VAL.5 MET.8 ASN.12 PRO.7 LYS.12 THR.9 PHE.5 ALA.15 HIS.3 GLY.11 ASP.13 LEU.23 ARG.5 TRP.2 GLU.10 TYR.7
4fcaA TOT.467 # ASP.23 SER.18 GLN.23 LYS.42 ASN.27 PRO.23 THR.28 PHE.14 ALA.22 HIS.17 GLY.40 ILE.23 LEU.40 ARG.10 TRP.9 VAL.31 GLU.51 TYR.26
2axcA TOT.228 # GLN.9 ILE.10 SER.20 VAL.29 LYS.12 ASN.5 PRO.20 THR.20 PHE.9 ALA.27 GLY.18 HIS.4 TRP.2 ARG.8 ASP.10 GLU.9 TYR.2 LEU.14
2hmvA TOT.138 # GLN.4 ILE.14 SER.6 VAL.12 LYS.9 THR.5 PRO.2 HIS.6 PHE.3 GLU.12 GLY.9 ASP.5 LEU.14 ARG.4 TRP.1 ALA.14 ASN.10 TYR.6 MET.2
3iu1A TOT.379 # CYS.4 ASP.19 SER.15 GLN.14 VAL.32 LYS.25 PRO.25 THR.24 PHE.19 GLU.23 HIS.13 GLY.19 ILE.15 LEU.44 ARG.18 TRP.8 ALA.15 ASN.18 TYR.17 MET.12
4l00A TOT.277 # CYS.9 GLN.7 ILE.19 SER.18 VAL.19 GLY.13 ASN.8 PRO.15 LYS.21 THR.12 PHE.11 ALA.12 HIS.7 MET.9 ASP.18 LEU.28 ARG.17 TRP.5 GLU.21 TYR.8
2zw5A TOT.293 # CYS.2 ASP.15 GLN.1 VAL.23 GLY.27 ASN.1 PRO.26 LYS.1 THR.21 PHE.4 ALA.51 HIS.12 MET.3 ILE.5 LEU.31 ARG.30 TRP.8 GLU.21 TYR.4 SER.7
3n4sA TOT.96 # CYS.1 ASP.5 SER.12 GLN.4 LYS.8 PRO.3 THR.4 PHE.5 ASN.4 HIS.1 GLY.3 ILE.5 LEU.13 ARG.2 TRP.1 ALA.2 VAL.6 GLU.7 TYR.9 MET.1
2wkbA TOT.105 # CYS.2 ASP.6 SER.13 GLN.2 LYS.6 PRO.4 GLY.5 THR.4 PHE.6 GLU.5 HIS.1 MET.1 ILE.11 LEU.10 ARG.5 ALA.5 VAL.4 ASN.10 TYR.5
1w5dA TOT.458 # GLN.11 ASP.34 SER.45 VAL.30 MET.10 ILE.24 PRO.20 LYS.38 THR.31 PHE.8 ALA.34 GLY.42 HIS.8 GLU.29 LEU.47 ARG.12 TRP.6 ASN.17 TYR.12
2b9sA TOT.381 # CYS.5 ASP.28 SER.17 GLN.14 MET.14 PRO.21 LYS.19 THR.14 PHE.21 GLU.24 HIS.13 GLY.19 ILE.17 LEU.31 ARG.23 TRP.11 ALA.30 VAL.30 ASN.16 TYR.14
2b9sB TOT.41 # CYS.1 GLN.1 ASP.2 SER.4 VAL.2 LYS.2 PRO.3 GLY.1 THR.2 PHE.4 ALA.6 MET.1 ILE.6 LEU.1 ARG.1 TRP.2 ASN.1 TYR.1
1n1cA TOT.187 # CYS.5 HIS.7 SER.17 GLN.15 LYS.6 ASN.8 PRO.5 THR.7 PHE.10 ALA.22 GLY.5 ASP.8 ILE.7 LEU.28 ARG.4 TRP.3 VAL.11 GLU.13 TYR.6
1knyA TOT.253 # CYS.4 ASP.13 SER.20 GLN.11 LYS.11 ASN.5 PRO.8 THR.15 PHE.10 ALA.13 HIS.8 GLY.18 ILE.18 LEU.20 ARG.9 TRP.6 VAL.18 GLU.25 TYR.12 MET.9
2yykA TOT.470 # CYS.3 ILE.18 SER.13 GLN.13 MET.12 ASN.15 PRO.26 LYS.23 THR.22 PHE.23 ALA.51 HIS.10 GLY.34 ASP.22 LEU.50 ARG.32 TRP.5 VAL.33 GLU.40 TYR.25
3nx3A TOT.383 # CYS.9 GLN.14 HIS.8 SER.25 VAL.20 LYS.44 ILE.26 PRO.9 THR.11 PHE.23 ALA.35 GLY.31 ASP.17 ASN.22 LEU.41 ARG.9 GLU.26 TYR.13
1dyoA TOT.153 # CYS.2 GLN.6 ILE.7 SER.10 VAL.13 LYS.3 PRO.7 THR.15 PHE.6 GLU.6 HIS.2 GLY.14 ASP.10 LEU.7 ARG.8 TRP.3 ALA.15 ASN.7 TYR.12
3wxmB TOT.346 # GLN.5 ASP.20 SER.23 VAL.44 LYS.10 ASN.1 PRO.16 THR.16 PHE.6 ALA.33 HIS.5 GLY.29 ILE.20 LEU.33 ARG.40 TRP.3 GLU.31 TYR.4 MET.7
2e1mB TOT.90 # ILE.4 SER.4 GLN.4 LYS.5 PRO.4 THR.8 PHE.5 ALA.11 HIS.1 GLY.3 ASP.7 LEU.6 ARG.6 TRP.5 VAL.5 GLU.7 TYR.5
2e1mC TOT.151 # CYS.1 HIS.6 VAL.15 GLN.5 LYS.1 ILE.3 PRO.10 GLY.14 THR.9 PHE.5 ALA.21 MET.2 ASP.8 GLU.9 LEU.6 ARG.9 TRP.4 ASN.5 TYR.10 SER.8
1o6oD TOT.5 # GLY.1 SER.1 PHE.2 ALA.1
4otnA TOT.123 # CYS.1 HIS.2 SER.10 GLN.8 LYS.9 ILE.8 PRO.4 THR.10 PHE.4 ALA.5 GLY.1 ASP.6 GLU.9 LEU.17 ARG.8 TRP.1 VAL.11 ASN.3 TYR.6
1no5A TOT.97 # GLN.4 ASP.10 SER.7 VAL.8 LYS.9 PRO.3 THR.4 PHE.4 ALA.7 GLY.2 ILE.8 LEU.12 ARG.6 TRP.3 GLU.7 TYR.3
4cqhA TOT.300 # CYS.3 HIS.10 GLN.16 VAL.20 MET.6 ILE.7 PRO.27 LYS.2 THR.24 PHE.8 ALA.36 GLY.22 ASP.8 GLU.15 LEU.46 ARG.19 TRP.3 ASN.7 TYR.8 SER.13
3vasA TOT.340 # CYS.7 GLN.10 ILE.30 SER.22 VAL.22 LYS.25 ASN.14 PRO.8 ARG.9 GLY.23 THR.14 PHE.16 ALA.31 MET.10 HIS.8 LEU.28 ASP.23 TRP.2 GLU.20 TYR.18
4ru0A TOT.409 # CYS.4 HIS.5 SER.17 GLN.18 LYS.21 ILE.21 PRO.20 THR.19 PHE.15 GLU.26 GLY.41 ASP.23 LEU.37 ARG.22 TRP.11 ALA.46 VAL.25 ASN.18 TYR.20
1v9tA TOT.164 # MET.4 HIS.4 GLN.10 VAL.17 LYS.9 ILE.8 PRO.11 THR.11 PHE.10 ALA.13 GLY.14 ASP.12 GLU.4 LEU.8 ARG.5 ASN.12 TYR.4 SER.8
3e96A TOT.296 # CYS.2 GLN.6 ILE.21 SER.13 VAL.29 LYS.15 PRO.15 THR.12 PHE.10 ALA.31 HIS.7 GLY.19 ASP.17 GLU.23 LEU.25 ARG.14 TRP.7 ASN.15 TYR.10 MET.5
1yioA TOT.198 # CYS.2 MET.8 HIS.6 VAL.15 GLN.15 LYS.7 ILE.12 PRO.7 THR.10 PHE.8 ALA.15 GLY.13 ASP.9 ASN.6 LEU.24 ARG.14 GLU.18 TYR.1 SER.8
3dgpA TOT.62 # ILE.3 SER.6 GLN.3 LYS.9 ASN.2 THR.2 PHE.4 ALA.2 GLY.3 ASP.6 LEU.7 ARG.2 TRP.1 VAL.3 GLU.5 TYR.4
2f06A TOT.141 # CYS.3 GLN.1 ILE.10 SER.10 VAL.15 LYS.12 ASN.13 PRO.4 THR.3 PHE.6 ALA.16 HIS.1 GLY.7 ASP.8 LEU.16 ARG.3 GLU.9 TYR.4
3dgpB TOT.63 # CYS.1 GLN.2 ILE.5 SER.4 VAL.5 LYS.6 THR.1 PRO.2 HIS.2 PHE.1 ALA.5 GLY.1 ASP.5 GLU.4 LEU.10 ARG.3 ASN.4 TYR.1 MET.1
3n7sC TOT.88 # CYS.6 GLN.3 ASP.5 SER.3 VAL.5 MET.2 ASN.2 PRO.4 LYS.1 THR.4 PHE.5 ALA.8 GLY.7 HIS.2 ILE.1 LEU.8 ARG.8 TRP.4 GLU.7 TYR.3
3n7sA TOT.84 # CYS.6 ILE.4 ASN.6 GLN.7 GLY.5 PRO.4 LYS.2 THR.8 PHE.3 ALA.4 HIS.1 MET.3 ASP.7 LEU.2 ARG.4 TRP.5 VAL.2 GLU.3 TYR.5 SER.3
3rysA TOT.335 # CYS.4 GLN.11 ASP.23 ASN.10 VAL.28 MET.8 PRO.16 LYS.6 THR.18 PHE.11 ALA.42 HIS.9 GLY.17 ILE.14 LEU.39 ARG.18 TRP.1 GLU.33 TYR.9 SER.18
1yq2A TOT.1020 # CYS.5 GLN.21 ASP.73 SER.71 VAL.80 GLY.97 ASN.24 PRO.79 LYS.11 THR.53 PHE.28 ALA.124 HIS.30 MET.15 ILE.26 LEU.85 ARG.80 TRP.34 GLU.59 TYR.25
2a87A TOT.308 # CYS.3 GLN.8 ASP.22 SER.14 VAL.28 MET.7 ASN.6 PRO.10 LYS.3 THR.28 PHE.13 ALA.41 HIS.8 GLY.33 ILE.11 LEU.24 ARG.27 TRP.1 GLU.15 TYR.6
3g5bA TOT.376 # CYS.13 GLN.17 ASP.12 SER.29 VAL.22 LYS.17 PRO.20 THR.30 PHE.12 ASN.10 HIS.12 GLY.26 ILE.13 LEU.56 ARG.15 TRP.6 ALA.24 GLU.25 TYR.13 MET.4
2p13A TOT.84 # ILE.7 SER.4 GLN.4 LYS.4 ASN.3 PRO.1 THR.4 PHE.2 ALA.6 HIS.3 GLY.8 ASP.5 LEU.8 ARG.4 TRP.3 VAL.8 GLU.7 TYR.3
2hf1A TOT.56 # CYS.3 ILE.4 SER.2 VAL.3 LYS.7 PRO.5 PHE.3 ALA.4 GLY.3 ASP.3 LEU.9 ARG.1 GLU.9
1fmjA TOT.334 # CYS.3 GLN.5 ILE.12 SER.12 VAL.14 LYS.24 PRO.22 GLY.15 THR.14 PHE.19 ALA.20 HIS.8 MET.14 ASP.23 GLU.25 LEU.40 ARG.19 TRP.5 ASN.17 TYR.23
3v85A TOT.204 # CYS.5 GLN.2 ASP.8 SER.11 VAL.15 LYS.15 PRO.9 THR.13 PHE.12 ALA.8 HIS.3 GLY.10 ILE.8 GLU.27 LEU.23 ARG.15 TRP.2 ASN.9 TYR.6 MET.3
3u4yA TOT.315 # CYS.3 GLN.13 ASP.19 SER.25 VAL.28 LYS.9 ASN.24 PRO.14 THR.29 PHE.23 ALA.17 HIS.4 GLY.26 ILE.30 LEU.25 ARG.9 GLU.12 TYR.5
4b4hA TOT.413 # CYS.4 GLN.11 ILE.24 SER.26 VAL.28 LYS.10 PRO.27 THR.14 PHE.10 GLU.24 HIS.6 GLY.46 ASP.30 LEU.27 ARG.19 TRP.11 ALA.38 ASN.34 TYR.19 MET.5
1zmoA TOT.235 # CYS.1 GLN.7 ILE.15 SER.12 VAL.14 LYS.3 ASN.9 PRO.19 THR.14 PHE.13 ALA.34 HIS.4 GLY.17 ASP.12 LEU.24 ARG.14 TRP.1 GLU.12 TYR.7 MET.3
2de6A TOT.389 # CYS.7 GLN.13 HIS.12 SER.12 VAL.30 LYS.29 ASN.20 PRO.21 ASP.31 THR.14 PHE.14 ALA.22 GLY.31 ILE.23 LEU.31 ARG.16 TRP.12 GLU.29 TYR.15 MET.7
2de6D TOT.104 # CYS.5 GLN.2 ILE.4 SER.5 VAL.13 LYS.4 ASN.2 PRO.6 THR.7 PHE.4 ALA.10 HIS.2 GLY.12 ASP.5 LEU.5 ARG.4 TRP.1 GLU.8 TYR.3 MET.2
2je0A TOT.149 # CYS.2 GLN.1 HIS.2 SER.10 VAL.7 LYS.13 ILE.5 PRO.5 THR.8 PHE.4 ASN.15 GLY.8 ASP.9 LEU.30 ARG.7 ALA.2 GLU.16 TYR.3 MET.2
3bmzA TOT.183 # CYS.3 GLN.4 ASP.14 SER.13 VAL.9 MET.3 ASN.3 PRO.14 LYS.3 HIS.1 THR.8 ALA.17 GLY.16 ILE.4 LEU.18 ARG.21 TRP.7 GLU.11 TYR.8 PHE.6
3ro8A TOT.304 # HIS.12 SER.12 VAL.22 GLN.11 LYS.20 ILE.13 PRO.11 THR.15 PHE.8 ALA.30 GLY.16 ASP.24 GLU.15 LEU.28 ARG.7 TRP.6 ASN.30 TYR.14 MET.10
3cjmA TOT.241 # PRO.12 GLN.14 ILE.17 SER.15 VAL.13 LYS.16 ASN.9 TRP.2 THR.21 PHE.10 ALA.21 GLY.13 HIS.6 LEU.19 ARG.4 ASP.16 GLU.17 TYR.16
4e1pA TOT.54 # GLN.1 ASP.7 SER.2 VAL.7 LYS.3 THR.6 PHE.2 ALA.5 GLY.6 ILE.1 GLU.3 LEU.5 ARG.3 TRP.1 ASN.1 TYR.1
2brfA TOT.100 # CYS.1 GLN.5 ASP.4 SER.5 VAL.9 LYS.3 ASN.2 PRO.10 THR.9 PHE.1 ALA.4 HIS.1 GLY.12 ILE.1 LEU.16 ARG.6 TRP.2 GLU.8 TYR.1
3oruA TOT.217 # CYS.6 ILE.7 SER.10 GLN.5 PRO.21 THR.11 PHE.5 ALA.18 HIS.7 GLY.19 ASP.15 GLU.13 LEU.24 ARG.23 TRP.3 VAL.18 ASN.8 TYR.4
2es9A TOT.97 # GLN.3 HIS.3 SER.7 VAL.9 LYS.8 ILE.5 PRO.5 THR.5 PHE.3 ALA.8 GLY.8 ASP.3 ASN.4 LEU.8 ARG.2 TRP.2 GLU.11 TYR.3
4j3nA TOT.666 # CYS.5 ILE.42 GLN.27 VAL.37 LYS.56 ASN.36 PRO.22 GLY.42 THR.32 PHE.28 ALA.39 HIS.16 MET.19 ASP.44 LEU.73 ARG.35 TRP.9 GLU.51 TYR.22 SER.31
1iz0A TOT.272 # ASP.4 GLN.4 VAL.32 LYS.5 ASN.2 PRO.24 THR.6 PHE.9 ALA.46 GLY.30 HIS.3 ILE.3 LEU.50 ARG.21 TRP.3 GLU.21 TYR.5 SER.4
3vsjA TOT.270 # CYS.3 GLN.6 ASP.17 SER.15 VAL.26 MET.3 ASN.8 PRO.13 LYS.11 THR.13 PHE.8 ALA.32 HIS.6 GLY.26 ILE.10 LEU.27 ARG.15 TRP.6 GLU.17 TYR.8
3vsjB TOT.303 # CYS.1 GLN.8 ASP.13 SER.15 VAL.20 GLY.24 ASN.10 PRO.20 LYS.14 THR.15 PHE.12 ALA.27 HIS.11 MET.14 ILE.14 LEU.26 ARG.16 TRP.8 GLU.25 TYR.10
1llfA TOT.534 # CYS.5 ILE.32 SER.44 GLN.20 MET.15 PRO.31 LYS.23 THR.32 PHE.31 ALA.47 HIS.6 GLY.55 ASP.34 GLU.12 LEU.47 ARG.14 TRP.6 VAL.28 ASN.33 TYR.19
2vefA TOT.277 # CYS.1 GLN.9 ILE.24 SER.13 VAL.24 GLY.17 ASN.9 PRO.12 LYS.11 ASP.13 THR.9 PHE.14 ALA.35 MET.7 HIS.8 LEU.26 ARG.16 TRP.1 GLU.26 TYR.2
2y71A TOT.138 # CYS.1 GLN.4 HIS.7 SER.7 VAL.12 LYS.1 ASN.5 PRO.5 THR.5 PHE.1 ALA.19 GLY.12 ILE.10 LEU.20 ARG.8 TRP.1 ASP.5 GLU.11 TYR.4
3hkvA TOT.192 # CYS.6 MET.1 ASP.9 GLN.10 VAL.18 LYS.3 ASN.6 PRO.12 THR.9 PHE.8 ALA.16 GLY.13 HIS.8 ILE.6 LEU.17 ARG.21 TRP.1 GLU.10 TYR.9 SER.9
3hx6A TOT.491 # CYS.2 GLN.25 ASP.32 SER.35 VAL.33 LYS.18 ASN.27 PRO.24 THR.38 PHE.20 ALA.50 GLY.55 HIS.6 ILE.19 LEU.38 ARG.20 TRP.8 GLU.16 TYR.18 MET.7
4eadA TOT.440 # PRO.15 CYS.2 GLN.11 ASP.33 SER.23 VAL.34 MET.19 ILE.27 ASN.12 LYS.22 THR.29 PHE.16 ALA.56 GLY.39 HIS.6 LEU.37 ARG.24 TRP.2 GLU.24 TYR.9
1lg7A TOT.163 # HIS.8 SER.12 GLN.2 MET.8 ILE.6 PRO.10 LYS.11 THR.8 PHE.12 ALA.14 GLY.9 ASP.7 GLU.9 LEU.12 ARG.10 TRP.3 VAL.9 ASN.5 TYR.8
3iwgA TOT.262 # CYS.6 HIS.7 GLN.20 VAL.13 LYS.17 PRO.4 ASP.9 THR.17 PHE.19 ALA.27 GLY.18 ILE.14 GLU.14 LEU.28 ARG.4 TRP.3 ASN.14 TYR.12 SER.16
4axsA TOT.288 # CYS.2 ILE.30 SER.10 GLN.13 GLY.27 THR.10 PRO.15 LYS.23 HIS.4 PHE.12 ALA.33 MET.5 ASP.19 GLU.7 LEU.18 ARG.2 VAL.29 ASN.22 TYR.7
3ipqA TOT.220 # ILE.13 SER.17 GLN.18 MET.6 ASN.6 PRO.11 LYS.8 THR.7 PHE.14 ALA.18 GLY.4 HIS.7 LEU.30 ARG.13 TRP.2 ASP.10 VAL.14 GLU.18 TYR.4
1gmlA TOT.149 # CYS.5 MET.4 GLN.3 ILE.16 ASN.5 VAL.10 LYS.10 PRO.5 THR.9 PHE.3 ALA.8 HIS.3 GLY.8 ASP.12 LEU.14 ARG.14 GLU.11 TYR.5 SER.4
2cwzA TOT.133 # GLN.1 HIS.4 ASN.2 VAL.16 LYS.6 PRO.8 ASP.1 THR.6 PHE.4 ALA.12 GLY.11 ILE.6 LEU.11 ARG.14 TRP.2 GLU.21 TYR.6 SER.2
3iquA TOT.235 # CYS.1 GLN.7 ASP.14 SER.19 VAL.12 LYS.17 ASN.7 PRO.5 THR.10 PHE.5 ALA.24 HIS.3 GLY.14 ILE.10 LEU.24 ARG.13 TRP.2 GLU.29 TYR.10 MET.9
1mjhA TOT.143 # ILE.16 SER.5 VAL.16 LYS.23 PRO.3 THR.6 PHE.4 ASN.8 GLY.6 HIS.4 LEU.12 ARG.2 ASP.6 ALA.6 GLU.21 TYR.2 MET.3
2y3vA TOT.158 # CYS.3 GLN.9 HIS.5 SER.18 VAL.9 LYS.11 ILE.9 PRO.7 THR.8 PHE.9 GLU.9 GLY.2 ASP.13 LEU.26 ARG.7 ALA.3 ASN.6 TYR.3 MET.1
4gt8A TOT.133 # HIS.4 SER.6 GLN.5 LYS.15 PRO.4 THR.6 PHE.5 ALA.5 GLY.10 ILE.10 GLU.10 LEU.15 ARG.6 ASP.10 VAL.10 ASN.7 TYR.2 MET.3
2o7tA TOT.172 # CYS.2 GLN.5 ASP.10 SER.11 VAL.9 LYS.2 PRO.9 THR.19 PHE.6 ALA.16 HIS.9 GLY.11 ILE.11 GLU.3 LEU.26 ARG.9 TRP.1 ASN.8 TYR.5
3iavA TOT.521 # CYS.4 ASP.37 SER.21 GLN.16 VAL.48 LYS.17 ILE.29 PRO.27 THR.34 PHE.23 ALA.58 GLY.51 HIS.16 ASN.15 LEU.38 ARG.32 TRP.1 GLU.32 TYR.13 MET.9
3rmgA TOT.293 # CYS.4 HIS.5 SER.18 GLN.7 LYS.13 ASN.12 PRO.6 GLY.12 THR.17 PHE.13 ALA.36 MET.3 ASP.21 ILE.20 LEU.39 ARG.9 TRP.1 VAL.23 GLU.23 TYR.11
4uwjA TOT.389 # CYS.4 GLN.10 HIS.14 SER.16 VAL.29 LYS.26 ILE.17 PRO.22 THR.26 PHE.17 GLU.26 GLY.19 ASP.19 LEU.46 ARG.20 TRP.8 ALA.24 ASN.19 TYR.19 MET.8
3vrhA TOT.298 # CYS.12 GLN.3 ASP.9 SER.13 VAL.16 LYS.37 ASN.11 PRO.12 THR.12 PHE.14 ALA.15 HIS.6 GLY.22 ILE.21 LEU.27 ARG.13 TRP.2 GLU.29 TYR.19 MET.5
3qq2A TOT.245 # GLN.8 ASP.14 SER.13 VAL.12 LYS.6 PRO.6 THR.12 PHE.7 ALA.27 HIS.3 GLY.42 ILE.7 GLU.9 LEU.20 ARG.23 TRP.8 ASN.8 TYR.19 MET.1
4bpuB TOT.216 # CYS.1 THR.3 GLN.12 ASP.12 SER.18 VAL.9 LYS.16 ASN.5 PRO.9 HIS.3 PHE.13 ALA.14 GLY.6 ILE.15 LEU.35 ARG.17 TRP.1 GLU.19 TYR.7 MET.1
1i7dA TOT.620 # CYS.12 MET.8 ILE.35 ASN.18 GLN.33 LYS.32 PRO.37 ASP.38 THR.28 PHE.23 ALA.60 GLY.32 HIS.17 LEU.62 ARG.49 TRP.8 VAL.44 GLU.43 TYR.15 SER.26
1dusA TOT.192 # CYS.1 GLN.2 ILE.18 SER.8 VAL.20 LYS.29 PRO.3 THR.10 PHE.4 ASN.11 HIS.2 GLY.15 ASP.17 LEU.16 ARG.8 TRP.1 ALA.8 GLU.12 TYR.7
3nngA TOT.152 # CYS.3 ILE.7 SER.9 GLN.3 LYS.8 PRO.8 THR.12 PHE.6 ALA.14 HIS.1 GLY.11 ASP.8 GLU.10 LEU.8 ARG.7 TRP.7 VAL.11 ASN.11 TYR.8
2g82A TOT.313 # GLN.4 ASP.21 SER.13 VAL.30 MET.6 ASN.12 PRO.12 LYS.15 THR.22 PHE.7 ALA.42 HIS.10 GLY.24 ILE.23 LEU.30 ARG.14 TRP.3 GLU.15 TYR.10
3zk1A TOT.89 # CYS.1 GLN.2 ILE.9 SER.7 VAL.6 LYS.3 PRO.3 THR.4 PHE.1 ALA.14 GLY.13 ASP.1 GLU.4 LEU.12 ARG.2 ASN.1 TYR.3 MET.3
3pnxA TOT.141 # CYS.1 ASP.7 GLN.5 VAL.5 LYS.13 ASN.4 PRO.5 THR.2 PHE.8 ALA.13 GLY.8 ILE.8 LEU.24 ARG.4 TRP.1 GLU.18 TYR.4 SER.11
2yrrA TOT.341 # CYS.1 GLN.6 ASP.13 ASN.4 VAL.29 MET.9 ILE.5 PRO.26 LYS.6 THR.12 PHE.10 ALA.53 GLY.35 HIS.7 LEU.52 ARG.27 TRP.3 GLU.25 TYR.9 SER.9
4c4aA TOT.641 # CYS.20 MET.18 ASP.39 VAL.55 GLN.34 LYS.25 PRO.42 THR.29 PHE.25 GLU.38 HIS.25 GLY.31 ILE.28 LEU.59 ARG.35 TRP.15 ALA.44 ASN.13 TYR.17 SER.49
2wcjA TOT.141 # CYS.6 GLN.2 HIS.7 SER.8 VAL.15 LYS.11 ILE.7 PRO.2 THR.6 PHE.8 ALA.9 GLY.5 ASP.13 ASN.4 LEU.7 ARG.5 TRP.1 GLU.16 TYR.2 MET.7
4tq2A TOT.177 # CYS.3 GLN.5 ASP.12 SER.19 VAL.12 GLY.9 ASN.4 PRO.4 LYS.11 THR.10 PHE.8 ALA.11 HIS.3 MET.4 ILE.11 LEU.11 ARG.12 TRP.5 GLU.20 TYR.3
3ix9A TOT.165 # GLN.7 HIS.5 SER.5 VAL.11 GLY.9 TRP.3 PRO.7 LYS.13 THR.11 PHE.10 ALA.9 MET.2 ILE.11 GLU.15 LEU.14 ARG.9 ASP.11 ASN.5 TYR.8
4rqtA TOT.375 # CYS.12 GLN.11 HIS.13 SER.20 VAL.33 LYS.25 ASN.12 PRO.18 GLY.39 THR.21 PHE.20 ALA.26 MET.8 ILE.27 LEU.21 ARG.13 TRP.3 ASP.18 GLU.29 TYR.6
1b0uA TOT.257 # CYS.1 ASP.11 SER.16 GLN.17 LYS.17 ASN.9 PRO.9 THR.7 PHE.9 ALA.15 HIS.11 GLY.22 ILE.14 LEU.31 ARG.15 TRP.1 VAL.23 GLU.19 TYR.3 MET.7
4rmhA TOT.290 # CYS.11 HIS.7 VAL.13 GLN.11 LYS.18 ILE.13 PRO.16 GLY.17 THR.11 PHE.17 ALA.19 MET.6 ASP.17 ASN.3 LEU.37 ARG.15 TRP.3 GLU.22 TYR.11 SER.23
2q7sA TOT.265 # CYS.2 ILE.12 GLN.7 VAL.18 LYS.3 ASN.9 PRO.23 THR.16 PHE.7 ALA.26 HIS.5 GLY.21 ASP.16 LEU.30 ARG.28 TRP.4 GLU.20 TYR.12 SER.6
2zkiA TOT.196 # CYS.3 GLN.3 HIS.4 SER.6 VAL.11 LYS.14 ASN.4 PRO.10 ARG.9 THR.18 PHE.10 ALA.14 GLY.22 ILE.16 LEU.13 TRP.2 ASP.8 GLU.16 TYR.8 MET.5
1pl4A TOT.198 # CYS.2 MET.2 HIS.10 VAL.9 GLN.10 LYS.15 ASN.14 PRO.10 ASP.8 THR.7 PHE.7 ALA.17 GLY.19 ILE.11 LEU.20 ARG.4 TRP.6 GLU.12 TYR.8 SER.7
2ggzA TOT.152 # CYS.1 ASP.11 SER.5 GLN.7 LYS.10 PRO.2 THR.6 PHE.13 GLU.10 HIS.3 GLY.10 ILE.10 LEU.19 ARG.1 TRP.2 ALA.7 VAL.8 ASN.14 TYR.6 MET.7
3g27A TOT.75 # CYS.5 THR.4 ILE.7 VAL.6 GLN.2 LYS.2 ASN.2 PRO.4 HIS.3 PHE.1 ALA.10 GLY.6 ASP.4 LEU.4 ARG.6 TRP.1 GLU.5 TYR.1 SER.2
3w7bA TOT.285 # CYS.1 GLN.9 ASP.9 SER.11 VAL.28 GLY.15 ILE.14 PRO.14 LYS.6 THR.10 PHE.12 ASN.4 MET.7 HIS.15 LEU.30 ARG.31 TRP.3 ALA.28 GLU.30 TYR.8
3rloA TOT.196 # CYS.4 GLN.4 ILE.12 SER.10 VAL.21 LYS.21 ASN.14 PRO.6 THR.14 PHE.11 ALA.12 HIS.5 GLY.10 ASP.6 LEU.12 ARG.8 GLU.17 TYR.5 MET.4
4feyA TOT.391 # CYS.2 ILE.34 SER.25 GLN.10 LYS.39 ASN.14 PRO.13 THR.15 PHE.17 ALA.45 HIS.3 GLY.30 ASP.23 LEU.35 ARG.7 TRP.2 VAL.38 GLU.27 TYR.6 MET.6
2be1A TOT.301 # CYS.1 GLN.11 ILE.28 SER.29 VAL.16 LYS.9 TRP.5 PRO.16 THR.15 PHE.16 ALA.14 GLY.18 HIS.7 GLU.18 LEU.30 ARG.13 ASP.16 ASN.22 TYR.11 MET.6
4hfmA TOT.325 # CYS.5 GLN.8 ASP.15 SER.21 VAL.35 LYS.24 ILE.17 PRO.14 THR.12 PHE.15 ALA.19 GLY.33 HIS.5 GLU.22 LEU.27 ARG.7 TRP.2 ASN.11 TYR.20 MET.13
3p5tL TOT.53 # GLN.2 ILE.3 SER.2 VAL.5 LYS.1 PRO.2 ASP.1 THR.4 PHE.3 ALA.4 GLY.6 HIS.2 GLU.3 LEU.6 ARG.1 TRP.2 ASN.4 TYR.1 MET.1
2f5gA TOT.130 # CYS.3 ILE.9 SER.7 GLN.2 LYS.14 ASN.7 PRO.6 ASP.1 THR.6 PHE.5 ALA.8 GLY.5 HIS.5 LEU.12 ARG.7 TRP.3 VAL.8 GLU.13 TYR.8 MET.1
2z99A TOT.158 # ASP.11 GLN.3 VAL.16 GLY.9 ASN.1 PRO.4 LYS.4 THR.17 PHE.3 ALA.25 HIS.1 MET.3 ILE.3 LEU.23 ARG.16 TRP.1 GLU.11 TYR.4 SER.3
2qkdA TOT.384 # CYS.9 ILE.25 SER.22 GLN.20 LYS.20 PRO.20 THR.29 PHE.16 ASN.22 HIS.6 GLY.23 ASP.22 LEU.33 ARG.20 TRP.1 ALA.20 VAL.20 GLU.38 TYR.7 MET.11
4ttrA TOT.199 # CYS.4 ILE.19 SER.15 GLN.8 LYS.18 PRO.7 THR.7 PHE.5 ASN.11 HIS.6 GLY.7 ASP.8 LEU.27 ARG.9 TRP.1 ALA.12 VAL.13 GLU.14 TYR.7 MET.1
2ywvA TOT.237 # CYS.1 MET.1 ILE.14 VAL.16 GLN.5 LYS.18 PRO.8 THR.11 PHE.9 ALA.23 HIS.3 GLY.14 ASP.17 GLU.22 LEU.35 ARG.15 TRP.2 ASN.9 TYR.6 SER.8
4dd8A TOT.191 # CYS.7 ASP.11 SER.16 GLN.10 GLY.13 ASN.11 PRO.6 LYS.1 THR.8 PHE.9 ALA.14 MET.7 HIS.8 ILE.4 LEU.15 ARG.11 TRP.2 VAL.23 GLU.11 TYR.4
1mk4A TOT.157 # CYS.2 ILE.11 SER.12 GLN.8 LYS.11 TRP.2 PRO.5 THR.13 PHE.12 ASN.6 GLY.12 HIS.6 LEU.8 ARG.7 ASP.9 ALA.3 VAL.13 GLU.8 TYR.5 MET.4
4kk7A TOT.385 # CYS.2 HIS.7 VAL.33 GLN.19 MET.9 PHE.4 PRO.41 LYS.9 THR.27 TRP.6 ALA.40 GLY.27 ILE.20 GLU.10 LEU.39 ARG.15 ASP.20 ASN.10 TYR.12 SER.35
2xphA TOT.227 # PRO.6 CYS.5 GLN.11 ILE.16 SER.9 VAL.12 GLY.9 TRP.5 LYS.22 THR.12 PHE.15 ALA.8 MET.9 HIS.6 GLU.16 LEU.19 ARG.12 ASP.13 ASN.15 TYR.7
1sezA TOT.421 # CYS.6 GLN.10 ASP.21 SER.42 VAL.31 LYS.24 PRO.19 THR.19 PHE.22 ALA.29 HIS.7 GLY.39 ILE.21 GLU.26 LEU.51 ARG.17 TRP.5 ASN.19 TYR.13
2c5lC TOT.93 # CYS.2 ILE.4 SER.10 GLN.10 LYS.9 ASN.2 PRO.5 THR.3 PHE.4 ALA.5 HIS.1 GLY.2 ASP.4 LEU.9 ARG.3 TRP.1 VAL.11 GLU.6 TYR.2
3eoqA TOT.396 # GLN.10 HIS.9 SER.10 VAL.31 LYS.12 TRP.2 PRO.18 THR.17 PHE.22 GLU.50 GLY.36 ILE.4 LEU.50 ARG.37 ASP.13 ALA.50 ASN.6 TYR.19
3txvA TOT.354 # CYS.4 GLN.10 ILE.17 SER.12 VAL.26 LYS.7 ASN.6 PRO.22 THR.14 PHE.15 ALA.71 GLY.27 HIS.11 LEU.34 ARG.17 TRP.3 ASP.18 GLU.27 TYR.13
2bl0C TOT.140 # ILE.7 ASN.6 GLN.8 MET.5 PRO.5 LYS.8 THR.12 PHE.15 ALA.10 GLY.12 ASP.9 LEU.11 ARG.7 VAL.4 GLU.15 TYR.2 SER.4
2bl0B TOT.145 # CYS.1 GLN.7 ILE.7 SER.10 VAL.7 LYS.11 ASN.8 PRO.4 GLY.10 THR.10 PHE.6 ALA.12 MET.3 ASP.10 LEU.17 ARG.4 GLU.15 TYR.3
3esmA TOT.136 # GLN.6 ILE.1 SER.11 VAL.15 LYS.1 PRO.16 THR.17 PHE.4 ALA.18 HIS.2 GLY.9 ASP.5 GLU.8 LEU.5 ARG.7 TRP.3 ASN.4 TYR.2 MET.2
3d4uA TOT.296 # CYS.7 GLN.2 ASP.13 SER.32 VAL.20 LYS.22 ILE.19 PRO.10 GLY.16 THR.8 PHE.10 ASN.12 MET.8 HIS.12 LEU.18 ARG.15 TRP.8 ALA.17 GLU.21 TYR.26
3d4uB TOT.74 # CYS.12 ASP.3 GLN.5 VAL.3 LYS.7 PRO.3 THR.2 PHE.1 ASN.2 GLY.10 LEU.7 ARG.2 TRP.1 ALA.3 GLU.5 TYR.1 SER.7
1xrsB TOT.212 # CYS.1 ILE.13 SER.8 GLN.8 MET.8 PRO.4 LYS.12 HIS.4 THR.11 GLU.21 GLY.17 ASP.12 LEU.20 ARG.8 ALA.18 VAL.18 ASN.13 TYR.7 PHE.9
1xrsA TOT.516 # CYS.4 ILE.39 SER.16 VAL.28 GLN.20 LYS.32 THR.30 PRO.16 HIS.7 PHE.25 ALA.47 GLY.40 ASP.26 GLU.46 LEU.52 ARG.19 ASN.32 TYR.16 MET.21
1at3A TOT.213 # CYS.3 GLN.3 ASP.11 SER.9 VAL.18 MET.2 PRO.13 THR.14 PHE.5 ALA.32 HIS.5 GLY.13 ILE.8 GLU.13 LEU.29 ARG.21 TRP.2 ASN.6 TYR.6
4oh1A TOT.327 # CYS.6 GLN.12 ASP.20 SER.20 VAL.22 LYS.24 ASN.11 PRO.12 THR.15 PHE.11 ALA.33 HIS.6 GLY.31 ILE.22 LEU.29 ARG.12 TRP.2 GLU.23 TYR.16
3q91A TOT.145 # CYS.3 GLN.6 ASP.8 SER.11 VAL.17 LYS.3 ILE.3 PRO.7 THR.9 PHE.6 GLU.12 GLY.11 HIS.3 LEU.16 ARG.7 TRP.3 ALA.13 ASN.2 TYR.4 MET.1
2ynaA TOT.306 # CYS.9 ASP.12 VAL.33 GLN.16 LYS.12 ILE.12 PRO.10 GLY.27 THR.26 PHE.13 ALA.20 MET.12 HIS.10 GLU.9 LEU.25 ARG.5 TRP.5 ASN.18 TYR.9 SER.23
3ut2A TOT.731 # CYS.4 GLN.27 ILE.22 SER.39 VAL.43 LYS.42 PRO.34 THR.44 PHE.28 GLU.35 HIS.10 GLY.74 ASP.57 LEU.60 ARG.35 TRP.21 ALA.79 ASN.42 TYR.18 MET.17
2gm5A TOT.119 # ASP.13 SER.7 GLN.7 LYS.10 THR.6 PHE.4 ASN.2 HIS.1 GLY.8 ILE.11 LEU.12 ARG.10 ALA.11 VAL.10 GLU.5 TYR.2
2dyjA TOT.91 # GLN.2 ASP.2 SER.5 VAL.7 LYS.3 ILE.1 PRO.4 THR.1 PHE.3 ALA.14 GLY.3 HIS.1 LEU.16 ARG.15 TRP.1 GLU.11 TYR.1 MET.1
4chjA TOT.123 # CYS.2 GLN.5 ASP.11 ASN.8 VAL.8 MET.4 PRO.4 LYS.8 THR.3 PHE.9 ALA.9 HIS.1 GLY.7 ILE.9 LEU.9 ARG.8 TRP.1 GLU.9 TYR.2 SER.6
3bu2A TOT.189 # CYS.2 ILE.9 GLN.9 VAL.25 LYS.15 PRO.7 THR.11 PHE.9 GLU.14 HIS.2 GLY.16 ASP.12 LEU.13 ARG.1 ALA.18 ASN.10 TYR.7 SER.9
2nmxA TOT.258 # CYS.1 GLN.9 ILE.10 SER.29 VAL.17 LYS.18 PRO.17 HIS.11 PHE.11 THR.14 GLY.16 ASP.14 GLU.13 LEU.20 ARG.7 TRP.6 ALA.18 ASN.17 TYR.8 MET.2
4dn2A TOT.188 # CYS.2 ASP.7 GLN.12 VAL.16 LYS.9 ILE.8 PRO.14 THR.4 PHE.7 ALA.19 GLY.16 HIS.2 GLU.15 LEU.21 ARG.11 TRP.2 ASN.4 TYR.9 SER.10
1af7A TOT.274 # CYS.2 GLN.13 HIS.8 SER.17 VAL.16 MET.6 ILE.12 PRO.9 LYS.7 THR.12 PHE.16 ASN.11 GLY.15 ASP.12 LEU.34 ARG.27 TRP.3 ALA.26 GLU.17 TYR.11
1w0hA TOT.194 # CYS.6 GLN.10 ILE.17 SER.10 VAL.9 LYS.16 TRP.3 PRO.9 THR.12 PHE.9 GLU.13 GLY.9 HIS.3 LEU.19 ARG.9 ASP.16 ALA.6 ASN.8 TYR.10
1vkwA TOT.203 # CYS.3 GLN.5 ILE.20 SER.10 VAL.11 LYS.12 PRO.14 THR.10 PHE.11 ALA.10 HIS.9 GLY.10 ASP.9 GLU.18 LEU.19 ARG.13 TRP.3 ASN.8 TYR.8
3khkA TOT.475 # CYS.3 GLN.23 HIS.9 SER.21 VAL.23 MET.12 ILE.26 PRO.18 LYS.33 THR.22 PHE.26 ALA.35 GLY.27 ASP.41 GLU.24 LEU.47 ARG.21 TRP.12 ASN.32 TYR.20
1gakA TOT.137 # CYS.2 GLN.5 ASP.8 SER.5 VAL.13 LYS.14 ILE.2 PRO.5 THR.4 PHE.9 ALA.4 GLY.9 HIS.2 GLU.6 LEU.10 ARG.15 TRP.1 ASN.6 TYR.8 MET.9
3v33A TOT.163 # CYS.2 THR.5 GLN.4 ILE.9 SER.9 VAL.16 GLY.10 ASN.6 PRO.11 LYS.11 HIS.4 PHE.9 ALA.3 MET.3 ASP.14 LEU.14 ARG.16 TRP.3 GLU.10 TYR.4
2q30A TOT.99 # GLN.2 HIS.5 SER.5 VAL.15 LYS.4 ILE.7 PRO.7 THR.4 PHE.6 ALA.8 GLY.8 ASP.5 ASN.3 LEU.8 ARG.3 GLU.9
3ushA TOT.113 # CYS.5 GLN.2 HIS.3 SER.4 VAL.10 LYS.3 ASN.2 PRO.8 THR.7 PHE.3 ALA.15 GLY.10 ASP.8 LEU.10 ARG.9 TRP.2 GLU.10 TYR.2
1uwwA TOT.181 # ILE.8 VAL.18 GLN.5 LYS.6 PRO.9 THR.11 PHE.11 ALA.14 HIS.2 GLY.13 ASP.16 GLU.15 LEU.11 ARG.8 TRP.6 ASN.14 TYR.7 SER.7
1i52A TOT.223 # CYS.5 GLN.8 HIS.11 SER.8 VAL.16 LYS.6 ASN.6 PRO.13 THR.12 PHE.6 ALA.30 GLY.15 ASP.15 ILE.9 LEU.27 ARG.17 TRP.2 GLU.12 TYR.3 MET.2
1ytvM TOT.6 # ASN.3 SER.3
1azzA TOT.222 # CYS.6 GLN.6 ILE.18 SER.14 VAL.23 MET.3 ASN.10 PRO.12 THR.22 PHE.8 ALA.18 HIS.4 GLY.26 ASP.18 LEU.13 ARG.4 TRP.4 GLU.6 TYR.7
4petA TOT.309 # ILE.15 SER.20 GLN.12 LYS.29 PRO.15 ASP.16 THR.15 PHE.17 ASN.19 GLY.27 HIS.7 LEU.25 ARG.9 TRP.8 ALA.27 VAL.13 GLU.17 TYR.18
4guaA TOT.644 # CYS.20 GLN.22 HIS.23 SER.39 VAL.48 LYS.37 ILE.32 PRO.41 THR.41 PHE.25 ALA.60 GLY.33 ASP.34 GLU.36 LEU.55 ARG.30 TRP.7 ASN.31 TYR.22 MET.8
3p8bB TOT.147 # GLN.3 ASP.6 SER.5 VAL.20 LYS.14 ASN.2 PRO.10 THR.5 PHE.6 ALA.12 HIS.3 GLY.12 ILE.15 LEU.9 ARG.7 GLU.13 TYR.5
2j1aA TOT.141 # GLN.2 HIS.5 SER.14 VAL.12 LYS.10 ASN.9 PRO.5 THR.11 PHE.6 ALA.12 GLY.10 ASP.11 ILE.5 LEU.6 ARG.5 TRP.2 GLU.11 TYR.4 MET.1
1qwoA TOT.434 # CYS.10 GLN.16 ASP.25 SER.40 VAL.28 GLY.31 ASN.19 PRO.21 LYS.25 THR.29 PHE.26 ALA.38 HIS.7 MET.5 ILE.14 LEU.39 ARG.19 TRP.5 GLU.20 TYR.17
1tzpA TOT.240 # CYS.6 GLN.19 ILE.12 SER.17 VAL.15 LYS.8 PRO.18 THR.11 PHE.9 ALA.15 HIS.9 GLY.19 ASP.17 GLU.7 LEU.25 ARG.15 TRP.6 ASN.4 TYR.2 MET.6
3qm9A TOT.145 # CYS.1 ILE.10 SER.5 ASN.6 GLN.4 LYS.15 TRP.1 PRO.5 THR.7 PHE.6 ALA.21 GLY.13 HIS.5 LEU.17 ARG.2 ASP.6 VAL.9 GLU.8 TYR.2 MET.2
2fl4A TOT.147 # CYS.1 ASP.8 SER.7 GLN.13 MET.5 ASN.8 PRO.1 LYS.7 THR.5 PHE.8 ALA.9 GLY.12 HIS.2 ILE.7 LEU.14 ARG.8 TRP.4 VAL.7 GLU.13 TYR.8
4a04A TOT.181 # ASP.13 SER.8 GLN.8 MET.9 PRO.10 LYS.12 THR.10 PHE.14 GLU.6 HIS.7 GLY.9 ILE.6 LEU.13 ARG.11 TRP.3 ALA.13 VAL.14 ASN.8 TYR.7
4r39A TOT.217 # CYS.1 GLN.15 ILE.17 SER.15 VAL.21 GLY.21 ASN.8 PRO.6 LYS.5 THR.10 PHE.2 ALA.20 HIS.4 MET.4 ASP.15 LEU.21 ARG.17 TRP.1 GLU.12 TYR.2
1psrA TOT.100 # CYS.2 ASP.11 SER.9 GLN.3 LYS.12 PRO.3 GLY.6 THR.5 PHE.6 ALA.6 HIS.3 MET.4 ILE.6 GLU.5 LEU.7 ARG.3 VAL.1 ASN.5 TYR.3
3no8A TOT.150 # CYS.5 GLN.6 ILE.9 SER.13 VAL.13 MET.2 PRO.6 LYS.3 ASP.7 THR.16 PHE.10 ASN.10 GLY.16 HIS.4 LEU.4 ARG.6 TRP.1 ALA.6 GLU.6 TYR.7
4g2cA TOT.462 # CYS.1 ASP.32 SER.20 GLN.18 LYS.16 ILE.7 PRO.35 THR.29 PHE.22 ALA.53 GLY.45 HIS.15 GLU.29 LEU.46 ARG.28 TRP.5 VAL.29 ASN.16 TYR.9 MET.7
1x92A TOT.194 # CYS.3 GLN.13 ILE.15 SER.18 VAL.12 LYS.4 PRO.7 THR.8 PHE.5 ASN.8 HIS.5 GLY.13 ASP.10 LEU.24 ARG.11 ALA.19 GLU.12 TYR.3 MET.4
4ls6A TOT.403 # CYS.3 ASP.26 SER.21 VAL.29 GLN.8 LYS.22 PRO.18 THR.28 PHE.16 ASN.17 HIS.7 GLY.44 ILE.29 LEU.23 ARG.14 TRP.2 ALA.47 GLU.24 TYR.13 MET.12
3mwcA TOT.387 # CYS.4 ILE.35 SER.24 GLN.9 LYS.29 ASN.15 PRO.16 THR.16 PHE.16 ALA.26 HIS.8 GLY.32 ASP.17 LEU.40 ARG.16 TRP.8 VAL.17 GLU.39 TYR.12 MET.8
3f85A TOT.452 # MET.9 ILE.16 GLN.21 VAL.54 LYS.27 ASN.21 PRO.21 THR.45 PHE.6 ALA.54 HIS.3 GLY.30 ASP.21 LEU.37 ARG.3 TRP.3 GLU.15 TYR.12 SER.54
2ra5A TOT.147 # CYS.1 GLN.3 HIS.4 SER.6 VAL.10 LYS.1 ASN.2 PRO.8 THR.14 PHE.4 ALA.19 GLY.13 ASP.6 ILE.4 LEU.19 ARG.16 GLU.12 TYR.5
3coqA TOT.89 # CYS.6 ASP.5 SER.5 GLN.3 LYS.12 PRO.4 THR.4 PHE.2 GLU.8 HIS.1 GLY.1 ILE.4 LEU.16 ARG.7 TRP.1 ALA.4 VAL.1 ASN.2 TYR.1 MET.2
3rdrA TOT.153 # CYS.2 ASP.10 SER.6 VAL.7 GLN.3 LYS.7 ILE.11 PRO.7 THR.12 PHE.4 ALA.19 GLY.13 HIS.7 GLU.6 LEU.9 ARG.4 TRP.5 ASN.14 TYR.5 MET.2
3zokA TOT.356 # CYS.6 GLN.8 ILE.19 SER.18 VAL.33 GLY.32 PRO.15 LYS.18 THR.20 PHE.12 ALA.31 HIS.8 MET.12 ASP.23 GLU.16 LEU.39 ARG.16 TRP.3 ASN.16 TYR.11
4mtkA TOT.627 # CYS.7 MET.8 ILE.29 GLN.39 VAL.45 LYS.16 PRO.34 THR.21 PHE.23 GLU.43 HIS.17 GLY.59 ASP.35 LEU.51 ARG.52 TRP.10 ALA.42 ASN.28 TYR.26 SER.42
3dcnA TOT.195 # CYS.4 GLN.7 ILE.14 SER.16 VAL.12 LYS.6 PRO.10 THR.14 PHE.8 ALA.25 HIS.1 GLY.18 ASP.8 GLU.7 LEU.15 ARG.8 TRP.1 ASN.11 TYR.8 MET.2
4qukA TOT.313 # CYS.6 GLN.7 ILE.12 SER.20 VAL.36 LYS.24 PRO.16 GLY.14 THR.15 TRP.5 ASN.18 MET.2 HIS.7 LEU.34 ARG.10 ASP.15 ALA.34 GLU.19 TYR.10 PHE.9
2nn4A TOT.62 # HIS.2 ASN.2 GLN.4 LYS.4 GLY.2 ASP.3 THR.3 PHE.4 ALA.4 MET.3 ILE.3 LEU.9 ARG.3 TRP.1 VAL.3 GLU.9 TYR.3
2x9gA TOT.249 # CYS.6 GLN.9 ASP.8 SER.19 VAL.26 MET.5 ASN.13 PRO.10 LYS.8 THR.11 PHE.7 ALA.35 HIS.5 GLY.17 ILE.14 LEU.23 ARG.12 TRP.1 GLU.14 TYR.6
3hlyA TOT.136 # CYS.1 ILE.9 VAL.10 GLN.8 LYS.1 ASN.2 PRO.8 THR.8 PHE.4 ALA.17 GLY.13 HIS.2 LEU.15 ARG.7 TRP.1 ASP.7 GLU.7 TYR.5 SER.11
4nwyA TOT.126 # HIS.4 SER.17 GLN.4 LYS.12 ILE.11 PRO.4 GLY.3 THR.4 PHE.7 ALA.4 MET.3 ASP.7 GLU.9 LEU.11 ARG.5 TRP.1 VAL.7 ASN.6 TYR.7
2ux0A TOT.125 # CYS.3 ILE.12 GLN.4 VAL.6 GLY.9 ASN.7 PRO.5 LYS.2 THR.9 PHE.5 ALA.7 HIS.7 MET.2 ASP.8 LEU.10 ARG.5 TRP.2 GLU.11 TYR.5 SER.6
3pp8A TOT.302 # CYS.1 ILE.12 SER.15 GLN.15 LYS.11 ASN.12 PRO.20 ASP.13 THR.11 PHE.10 ALA.35 GLY.20 HIS.7 LEU.37 ARG.20 TRP.10 VAL.25 GLU.20 TYR.8
1ci0A TOT.197 # CYS.1 GLN.6 ASP.12 ASN.9 VAL.10 LYS.12 PRO.12 THR.14 PHE.11 ALA.11 HIS.4 GLY.9 ILE.11 LEU.15 ARG.20 TRP.7 GLU.17 TYR.4 SER.12
4c2vC TOT.41 # ILE.4 SER.2 GLN.3 LYS.2 PRO.4 THR.2 PHE.1 ALA.3 GLY.2 ASP.3 GLU.2 LEU.4 ARG.2 TRP.1 VAL.1 ASN.1 TYR.3 MET.1
4q7eA TOT.122 # GLN.3 ASP.7 SER.2 VAL.6 LYS.8 ILE.6 PRO.7 THR.4 PHE.8 ALA.9 GLY.7 HIS.2 GLU.15 LEU.20 ARG.10 TRP.1 ASN.3 TYR.3 MET.1
2qc1B TOT.211 # CYS.4 HIS.7 GLN.9 VAL.21 LYS.12 ILE.15 PRO.12 GLY.9 THR.14 PHE.9 ASN.10 MET.3 ASP.15 LEU.14 ARG.8 TRP.7 ALA.7 GLU.14 TYR.10 SER.11
2wnkA TOT.221 # CYS.12 GLN.12 ASP.12 SER.23 VAL.21 LYS.13 ASN.6 PRO.9 THR.18 PHE.7 ALA.26 HIS.4 GLY.12 ILE.6 LEU.19 ARG.4 GLU.15 TYR.2
3mpcA TOT.96 # GLN.1 HIS.1 SER.11 VAL.7 LYS.4 PRO.5 ASP.2 THR.14 PHE.1 ALA.12 GLY.8 ILE.3 GLU.3 LEU.6 ARG.1 TRP.1 ASN.9 TYR.7
1nuyA TOT.327 # CYS.6 ASP.18 SER.19 GLN.6 MET.9 ASN.15 PRO.15 LYS.25 THR.19 PHE.9 ALA.27 HIS.4 GLY.27 ILE.24 LEU.28 ARG.13 VAL.29 GLU.19 TYR.15
1vg0A TOT.476 # CYS.20 ILE.28 SER.43 GLN.24 GLY.24 PRO.19 LYS.23 THR.28 PHE.24 ALA.23 HIS.7 MET.10 ASP.24 GLU.31 LEU.46 ARG.27 TRP.4 VAL.33 ASN.16 TYR.22
1f1gA TOT.153 # CYS.2 MET.1 ILE.6 ASN.8 GLN.3 LYS.10 PRO.8 THR.10 PHE.6 ALA.13 GLY.22 HIS.6 LEU.6 ARG.4 ASP.9 VAL.17 GLU.10 TYR.1 SER.11
3uc3A TOT.272 # CYS.7 GLN.8 ASP.19 SER.19 VAL.15 LYS.12 ASN.7 PRO.15 THR.10 PHE.11 ALA.17 HIS.8 GLY.13 ILE.29 LEU.24 ARG.20 TRP.2 GLU.17 TYR.12 MET.7
1xynA TOT.178 # ILE.6 SER.23 GLN.11 MET.2 PRO.6 LYS.1 ASP.5 THR.18 PHE.6 ALA.9 GLY.22 HIS.3 GLU.5 LEU.6 ARG.3 TRP.6 VAL.18 ASN.18 TYR.10
3d54D TOT.209 # CYS.3 THR.2 GLN.3 ILE.18 SER.8 VAL.17 LYS.14 ASN.12 PRO.9 HIS.3 PHE.10 ALA.15 GLY.23 ASP.14 LEU.19 ARG.10 TRP.1 GLU.16 TYR.9 MET.3
3fbiA TOT.57 # CYS.1 GLN.3 ILE.3 ASN.2 VAL.1 LYS.7 PRO.10 THR.2 PHE.3 ALA.4 GLY.1 ASP.1 LEU.5 ARG.1 TRP.1 GLU.4 TYR.5 SER.3
2gumA TOT.576 # CYS.10 GLN.20 ASP.34 SER.30 VAL.47 LYS.18 ASN.26 PRO.27 THR.50 PHE.30 ALA.43 HIS.17 GLY.31 ILE.25 LEU.34 ARG.46 TRP.7 GLU.37 TYR.32 MET.12
3fbiB TOT.91 # CYS.3 ILE.6 GLN.7 VAL.4 LYS.4 PRO.7 THR.3 PHE.5 GLU.8 GLY.3 ASP.2 LEU.15 ARG.1 TRP.2 ALA.2 ASN.8 TYR.7 SER.4
3clqA TOT.400 # CYS.6 GLN.12 ILE.27 ASN.23 VAL.33 LYS.14 PRO.23 THR.32 PHE.16 ALA.43 HIS.10 GLY.41 ASP.20 LEU.34 ARG.12 TRP.3 GLU.25 TYR.9 SER.17
1tvlA TOT.390 # ILE.28 GLN.15 VAL.19 LYS.19 ASN.16 PRO.18 ARG.23 THR.24 PHE.27 ALA.36 HIS.12 GLY.32 ASP.18 SER.27 LEU.27 TRP.5 GLU.33 TYR.7 MET.4
1ly1A TOT.152 # CYS.1 GLN.2 HIS.2 SER.9 VAL.10 LYS.17 ILE.11 PRO.6 GLY.12 THR.9 PHE.5 ALA.7 MET.5 ASP.8 ASN.6 LEU.8 ARG.10 TRP.4 GLU.11 TYR.9
4lqsA TOT.323 # CYS.4 ILE.25 SER.22 GLN.12 LYS.15 ASN.4 PRO.15 GLY.21 THR.21 PHE.19 ALA.15 HIS.10 MET.8 ASP.20 LEU.31 ARG.25 TRP.7 VAL.11 GLU.21 TYR.17
4lqsB TOT.104 # MET.1 ILE.7 VAL.10 GLN.5 LYS.2 ASN.7 PRO.7 THR.4 PHE.11 ALA.9 HIS.7 GLY.3 ASP.3 LEU.10 TRP.3 GLU.5 TYR.5 SER.5
4h87A TOT.123 # CYS.4 GLN.3 HIS.6 SER.10 VAL.7 LYS.3 ASN.1 PRO.11 ASP.3 THR.10 PHE.5 ALA.6 GLY.17 ILE.3 LEU.13 ARG.9 TRP.1 GLU.3 TYR.7 MET.1
4pj0R TOT.34 # ILE.1 GLN.2 VAL.7 LYS.2 PRO.2 ALA.4 GLY.1 ASP.1 LEU.8 ARG.2 TRP.2 ASN.1 TYR.1
4agiA TOT.309 # ILE.20 SER.22 GLN.14 LYS.10 PRO.14 THR.23 PHE.12 GLU.9 HIS.6 GLY.36 ASP.15 LEU.20 ARG.13 TRP.11 ALA.29 VAL.17 ASN.18 TYR.18 MET.2
1x8bA TOT.254 # CYS.4 ILE.16 SER.20 GLN.9 LYS.14 THR.6 PRO.11 HIS.12 PHE.9 ASN.8 GLY.16 ASP.12 LEU.25 ARG.16 TRP.2 ALA.19 VAL.19 GLU.19 TYR.9 MET.8
4ci7A TOT.456 # CYS.2 GLN.8 ASP.29 SER.45 VAL.29 LYS.38 ASN.36 PRO.17 GLY.32 THR.36 PHE.14 ALA.34 HIS.5 MET.12 ILE.15 LEU.30 ARG.6 TRP.9 GLU.26 TYR.33
3o0yA TOT.585 # ILE.37 SER.39 GLN.41 LYS.33 ASN.24 PRO.25 THR.30 PHE.18 ALA.51 HIS.8 GLY.40 ASP.29 LEU.57 ARG.24 TRP.9 VAL.38 GLU.42 TYR.26 MET.14
2r14A TOT.362 # CYS.3 MET.4 ILE.13 GLN.15 VAL.21 LYS.5 PHE.18 PRO.27 HIS.7 THR.20 ALA.41 GLY.37 ASP.22 GLU.26 LEU.32 ARG.29 TRP.3 ASN.13 TYR.14 SER.12
3npkA TOT.260 # CYS.4 ASP.14 VAL.9 GLN.11 LYS.20 ILE.21 PRO.5 THR.10 PHE.14 ALA.22 GLY.11 HIS.11 ASN.20 LEU.48 ARG.5 GLU.22 TYR.4 SER.9
3twoA TOT.347 # CYS.9 GLN.6 HIS.16 SER.20 VAL.32 MET.8 ILE.26 PRO.15 LYS.35 THR.13 PHE.19 ALA.20 GLY.30 ASP.23 GLU.18 LEU.23 ARG.6 TRP.1 ASN.11 TYR.16
3eglA TOT.247 # CYS.2 ASP.16 SER.26 GLN.7 ASN.7 PRO.7 THR.15 PHE.6 ALA.42 HIS.5 GLY.16 ILE.15 LEU.22 ARG.16 TRP.3 VAL.22 GLU.17 TYR.3
1gwiA TOT.394 # CYS.1 GLN.6 ASP.22 SER.17 VAL.38 MET.7 ILE.15 PRO.28 LYS.7 THR.27 PHE.11 ALA.54 GLY.27 HIS.14 ASN.7 LEU.49 ARG.30 TRP.5 GLU.25 TYR.4
1gpiA TOT.430 # CYS.18 GLN.18 ASP.34 SER.36 VAL.22 LYS.19 ILE.13 PRO.16 THR.48 PHE.16 ALA.30 GLY.49 HIS.5 GLU.10 LEU.26 ARG.8 TRP.8 ASN.31 TYR.13 MET.10
4wjsA TOT.485 # CYS.6 ASP.35 SER.36 GLN.12 GLY.39 PRO.18 LYS.31 THR.36 PHE.15 ALA.39 HIS.22 MET.4 ILE.18 GLU.19 LEU.39 ARG.28 TRP.18 VAL.39 ASN.22 TYR.9
3tc1A TOT.288 # CYS.2 ILE.27 SER.18 GLN.14 LYS.30 ASN.13 PRO.3 GLY.14 THR.11 PHE.16 ALA.22 HIS.4 MET.8 ASP.19 LEU.39 ARG.5 TRP.3 VAL.9 GLU.23 TYR.8
2oqzA TOT.204 # GLN.13 ASP.19 ASN.9 VAL.12 LYS.16 ILE.12 PRO.2 THR.17 PHE.12 ALA.8 GLY.10 HIS.3 LEU.13 ARG.10 TRP.1 GLU.16 TYR.18 SER.13
1znwA TOT.182 # CYS.2 GLN.8 ILE.9 SER.9 VAL.22 LYS.4 PHE.5 PRO.10 THR.11 TRP.2 ALA.21 GLY.14 HIS.4 GLU.11 LEU.19 ARG.17 ASP.10 ASN.2 TYR.1 MET.1
4nejA TOT.118 # CYS.2 ILE.9 SER.8 GLN.6 LYS.10 ASN.8 PRO.3 GLY.2 THR.10 PHE.5 ALA.4 HIS.2 MET.4 ASP.3 LEU.21 ARG.2 TRP.1 VAL.4 GLU.11 TYR.3
3qe7A TOT.407 # CYS.4 GLN.5 ILE.46 SER.23 VAL.40 LYS.13 TRP.4 PRO.21 THR.24 PHE.22 ALA.43 GLY.44 HIS.6 GLU.9 LEU.60 ARG.8 ASP.6 ASN.10 TYR.9 MET.10
3bv4A TOT.341 # CYS.8 GLN.15 ILE.19 SER.17 VAL.23 LYS.26 ASN.13 PRO.17 THR.22 PHE.6 ALA.37 HIS.9 GLY.28 ASP.13 LEU.33 ARG.15 TRP.3 GLU.23 TYR.11 MET.3
3fdsD TOT.241 # ASP.17 SER.24 GLN.6 LYS.15 ASN.7 PRO.8 GLY.14 THR.14 PHE.18 ALA.12 HIS.1 MET.5 ILE.18 LEU.28 ARG.9 VAL.16 GLU.21 TYR.8
3s2kC TOT.76 # CYS.10 HIS.5 VAL.3 GLN.5 LYS.7 TRP.1 PRO.1 THR.2 PHE.2 ALA.2 GLY.8 ILE.3 LEU.6 ARG.8 ASP.1 GLU.4 TYR.1 SER.7
3fdsC TOT.249 # GLN.2 ASP.16 SER.27 VAL.20 LYS.25 PRO.8 THR.16 PHE.11 ASN.8 HIS.2 GLY.12 ILE.24 LEU.18 ARG.7 TRP.1 ALA.17 GLU.21 TYR.5 MET.9
3awdA TOT.257 # CYS.4 ASP.14 SER.13 GLN.14 LYS.7 ASN.10 PRO.6 GLY.21 THR.13 PHE.4 ALA.35 HIS.4 MET.12 ILE.17 LEU.16 ARG.13 TRP.4 VAL.29 GLU.16 TYR.5
2wgpA TOT.167 # CYS.4 MET.3 HIS.7 GLN.6 VAL.16 LYS.8 PRO.9 ASP.5 THR.8 PHE.7 ALA.14 GLY.11 ILE.12 GLU.6 LEU.13 ARG.11 TRP.3 ASN.7 TYR.7 SER.10
3nzzA TOT.286 # CYS.1 GLN.21 HIS.3 SER.35 VAL.18 LYS.18 ILE.11 PRO.7 THR.19 PHE.6 ASN.21 GLY.17 ASP.15 LEU.32 ARG.5 TRP.4 ALA.22 GLU.15 TYR.10 MET.6
1h5qA TOT.260 # CYS.3 GLN.14 ILE.19 SER.20 VAL.25 LYS.14 PRO.6 THR.19 PHE.11 ALA.30 HIS.4 GLY.22 ASP.12 GLU.9 LEU.16 ARG.7 TRP.3 ASN.15 TYR.7 MET.4
1kcqA TOT.99 # CYS.2 ASP.4 SER.7 GLN.5 VAL.10 LYS.4 ASN.7 PRO.5 THR.5 PHE.3 ALA.7 GLY.9 HIS.2 ILE.3 LEU.7 ARG.6 TRP.2 GLU.9 TYR.1 MET.1
3ovkA TOT.126 # CYS.2 ILE.6 GLN.7 VAL.8 LYS.4 ASN.1 PRO.1 THR.10 PHE.7 ALA.12 GLY.9 HIS.3 LEU.20 ARG.7 ASP.5 GLU.10 TYR.4 SER.10
3ooqA TOT.373 # CYS.2 GLN.5 ILE.27 SER.13 VAL.38 LYS.35 THR.21 PRO.21 HIS.8 PHE.18 ASN.10 GLY.33 ASP.23 LEU.30 ARG.17 TRP.1 ALA.29 GLU.33 TYR.9
4s1hA TOT.286 # CYS.6 GLN.5 HIS.11 SER.20 VAL.20 MET.5 ILE.36 PRO.8 LYS.17 THR.24 PHE.12 ALA.8 GLY.19 ASP.15 GLU.16 LEU.29 ARG.6 TRP.1 ASN.18 TYR.10
4f8lA TOT.137 # GLN.3 ASP.13 SER.8 VAL.12 LYS.10 PRO.6 THR.13 PHE.6 GLU.5 HIS.3 GLY.16 ILE.7 LEU.6 ARG.2 TRP.3 ALA.5 ASN.6 TYR.8 MET.5
3a5fA TOT.282 # CYS.5 GLN.5 ILE.33 SER.15 VAL.21 LYS.16 ASN.22 PRO.11 THR.23 PHE.6 ALA.21 HIS.3 GLY.21 ASP.14 LEU.28 ARG.4 TRP.2 GLU.18 TYR.6 MET.8
2f01A TOT.120 # GLN.3 HIS.2 ASN.7 VAL.7 LYS.3 ILE.3 PRO.1 THR.19 PHE.2 ALA.16 GLY.16 ASP.4 LEU.7 ARG.4 TRP.6 GLU.5 TYR.6 SER.9
1hssA TOT.111 # CYS.10 HIS.2 SER.6 GLN.6 LYS.3 ASN.1 PRO.8 THR.2 PHE.2 ALA.15 GLY.6 ILE.3 LEU.10 ARG.8 TRP.1 ASP.6 VAL.10 GLU.4 TYR.5 MET.3
3gdmA TOT.261 # CYS.4 GLN.6 HIS.4 SER.11 ASN.5 VAL.19 LYS.21 TRP.3 PRO.7 THR.17 PHE.8 ALA.25 GLY.26 ILE.14 LEU.26 ARG.15 ASP.19 GLU.17 TYR.9 MET.5
1ta3A TOT.274 # CYS.4 GLN.6 HIS.11 SER.20 VAL.19 LYS.16 ILE.6 PRO.13 THR.14 PHE.10 ALA.22 GLY.32 ASP.19 GLU.7 LEU.23 ARG.12 TRP.9 ASN.10 TYR.17 MET.4
1y96A TOT.86 # GLN.2 ILE.3 SER.5 VAL.10 LYS.6 PRO.2 THR.6 PHE.2 ALA.3 HIS.3 GLY.6 ASP.4 GLU.9 LEU.6 ARG.3 TRP.3 ASN.4 TYR.3 MET.6
1y96B TOT.85 # CYS.1 MET.1 ILE.3 ASN.1 GLN.7 LYS.1 PRO.2 THR.4 PHE.4 ALA.11 HIS.3 GLY.4 ASP.3 LEU.10 ARG.7 VAL.7 GLU.6 TYR.3 SER.7
2nygA TOT.260 # CYS.2 GLN.9 ILE.18 SER.21 VAL.21 LYS.16 THR.12 PRO.14 GLY.19 HIS.6 PHE.11 ASN.14 MET.5 ASP.8 LEU.22 ARG.10 TRP.7 ALA.14 GLU.22 TYR.9
2f8mA TOT.226 # CYS.4 ASP.15 SER.12 GLN.2 LYS.15 PRO.4 THR.23 PHE.7 GLU.10 HIS.6 GLY.19 ILE.27 LEU.27 ARG.7 ALA.7 VAL.16 ASN.13 TYR.7 MET.5
3lfjA TOT.158 # CYS.1 ILE.13 GLN.4 VAL.18 LYS.11 PRO.7 GLY.9 THR.11 PHE.7 GLU.10 HIS.3 MET.7 ASP.11 LEU.13 ARG.5 TRP.3 ALA.8 ASN.4 TYR.4 SER.9
3c12A TOT.138 # GLN.4 ASP.9 SER.11 VAL.16 LYS.6 ASN.7 PRO.4 THR.13 PHE.4 ALA.23 HIS.1 GLY.16 ILE.4 LEU.11 ARG.2 TRP.1 GLU.2 TYR.3 MET.1
1dpeA TOT.506 # CYS.4 MET.15 ILE.21 GLN.25 VAL.38 LYS.43 ASN.23 PRO.31 THR.24 PHE.21 ALA.41 HIS.9 GLY.32 ASP.36 LEU.33 ARG.17 TRP.9 GLU.32 TYR.27 SER.25
4af0A TOT.395 # CYS.5 GLN.14 ILE.23 SER.31 VAL.27 LYS.20 TRP.1 PRO.18 THR.17 PHE.11 ALA.45 GLY.40 HIS.10 GLU.21 LEU.35 ARG.18 ASP.20 ASN.15 TYR.14 MET.10
2ddbA TOT.207 # CYS.16 ASP.5 SER.19 GLN.8 LYS.20 PRO.14 GLY.11 THR.8 PHE.6 ALA.17 HIS.6 MET.3 ILE.11 GLU.4 LEU.7 ARG.9 TRP.6 VAL.11 ASN.16 TYR.10
3bdrA TOT.150 # CYS.3 GLN.7 ILE.8 SER.17 VAL.7 LYS.4 ASN.1 PRO.4 THR.9 PHE.9 ALA.11 HIS.3 GLY.14 ASP.9 LEU.15 ARG.12 TRP.4 GLU.10 TYR.3
4nv0A TOT.299 # CYS.2 GLN.15 ILE.22 SER.18 VAL.21 LYS.14 PRO.14 THR.17 PHE.17 GLU.18 HIS.12 GLY.16 ASP.25 LEU.25 ARG.15 TRP.2 ALA.15 ASN.12 TYR.8 MET.11
4bh6A TOT.303 # CYS.6 GLN.4 ILE.16 SER.28 VAL.25 GLY.22 PRO.8 LYS.16 ASP.24 THR.21 PHE.7 ASN.18 MET.6 HIS.13 LEU.28 ARG.14 TRP.9 ALA.19 GLU.10 TYR.9
1p71A TOT.94 # GLN.1 ASP.3 SER.6 VAL.9 LYS.11 ASN.3 PRO.5 THR.6 PHE.4 ALA.14 GLY.6 ILE.3 LEU.5 ARG.6 GLU.10 MET.2
4kt3B TOT.115 # CYS.2 GLN.6 ASP.10 SER.8 VAL.5 LYS.3 ILE.3 PRO.6 THR.5 PHE.3 ALA.9 GLY.13 HIS.2 ASN.4 LEU.14 ARG.8 TRP.2 GLU.7 TYR.5
4bh6I TOT.63 # CYS.1 ASP.1 VAL.3 GLN.1 LYS.3 THR.1 PRO.3 GLY.2 HIS.2 PHE.1 ALA.5 MET.1 ILE.4 GLU.9 LEU.5 ARG.5 ASN.10 TYR.3 SER.3
2o2zA TOT.291 # CYS.3 GLN.4 HIS.8 SER.22 VAL.31 LYS.18 ASN.10 PRO.14 THR.17 PHE.7 ALA.19 GLY.33 ILE.24 LEU.33 ARG.9 ASP.16 GLU.18 TYR.5
4mxtA TOT.178 # GLN.9 ILE.5 SER.13 VAL.15 LYS.13 ASN.4 PRO.7 THR.15 PHE.8 ALA.14 HIS.2 GLY.12 ASP.11 LEU.14 ARG.7 TRP.3 GLU.12 TYR.14
3p4eA TOT.323 # CYS.6 ILE.26 SER.12 GLN.8 VAL.28 LYS.21 ASN.11 PRO.11 THR.16 PHE.6 ALA.34 HIS.8 GLY.36 ASP.18 LEU.28 ARG.9 TRP.5 GLU.26 TYR.8 MET.6
3sumA TOT.135 # CYS.6 ASP.9 SER.6 GLN.7 LYS.10 ASN.8 PRO.8 THR.9 PHE.8 ALA.11 GLY.12 HIS.3 ILE.2 LEU.11 ARG.2 TRP.4 VAL.9 GLU.7 TYR.3
4f55A TOT.128 # CYS.1 ASP.5 SER.6 GLN.5 LYS.7 THR.10 PRO.8 HIS.1 PHE.5 ALA.14 GLY.12 ILE.9 GLU.4 LEU.6 ARG.5 TRP.3 VAL.10 ASN.10 TYR.6 MET.1
3rk1A TOT.216 # CYS.1 HIS.3 SER.13 GLN.4 LYS.23 ILE.12 PRO.4 THR.8 PHE.7 GLU.24 GLY.17 ASP.9 LEU.26 ARG.7 TRP.3 ALA.17 VAL.20 ASN.7 TYR.11
4n8pA TOT.119 # CYS.4 ASP.2 VAL.12 GLN.5 MET.4 PRO.8 LYS.4 THR.11 PHE.4 ALA.7 HIS.2 GLY.10 ILE.4 GLU.11 LEU.10 ARG.4 ASN.4 TYR.8 SER.5
1t6nA TOT.207 # CYS.7 ASP.9 SER.10 GLN.11 LYS.17 ILE.12 PRO.10 THR.7 PHE.13 ALA.10 GLY.10 HIS.7 ASN.4 LEU.21 ARG.11 VAL.19 GLU.16 TYR.2 MET.11
4i9fA TOT.336 # CYS.4 GLN.12 ASP.23 SER.19 VAL.32 LYS.4 PRO.16 THR.18 PHE.5 ALA.56 HIS.6 GLY.31 ILE.10 GLU.15 LEU.36 ARG.27 TRP.6 ASN.8 TYR.2 MET.6
1lurA TOT.323 # CYS.4 ASP.27 SER.19 GLN.8 LYS.22 ILE.15 PRO.15 THR.25 PHE.18 ALA.24 GLY.25 HIS.14 GLU.20 LEU.28 ARG.10 TRP.3 VAL.18 ASN.17 TYR.11
1e0cA TOT.270 # GLN.9 HIS.9 SER.11 VAL.13 MET.2 ILE.12 PRO.23 LYS.6 THR.11 PHE.5 GLU.19 GLY.29 ASP.17 LEU.33 ARG.20 TRP.7 ALA.31 ASN.3 TYR.10
1uiyA TOT.248 # CYS.1 GLN.2 ASP.10 SER.7 VAL.25 LYS.12 THR.9 PRO.13 HIS.3 PHE.9 ALA.40 GLY.21 ILE.4 ASN.7 LEU.38 ARG.19 TRP.1 GLU.23 TYR.4
4bloA TOT.269 # CYS.3 GLN.5 ILE.20 SER.19 VAL.34 GLY.23 PRO.10 LYS.9 THR.18 PHE.8 ALA.27 HIS.3 MET.7 ASP.18 GLU.10 LEU.26 ARG.12 TRP.2 ASN.8 TYR.7
3ozfA TOT.233 # CYS.7 GLN.1 ILE.16 SER.12 VAL.18 LYS.24 TRP.1 PRO.10 THR.9 PHE.15 GLU.13 GLY.15 HIS.9 LEU.22 ARG.7 ASP.17 ALA.10 ASN.13 TYR.12 MET.2
2ymyA TOT.40 # PRO.1 HIS.1 SER.2 GLN.5 LYS.6 ILE.2 ASN.2 THR.1 PHE.2 ALA.1 ASP.1 LEU.6 ARG.2 GLU.7 TYR.1
2x5fA TOT.428 # CYS.1 GLN.20 HIS.11 SER.25 VAL.25 LYS.28 ILE.28 PRO.18 THR.31 PHE.20 ALA.34 GLY.21 ASP.32 GLU.21 LEU.39 ARG.11 TRP.4 ASN.29 TYR.19 MET.11
2fh7A TOT.562 # CYS.11 MET.19 ASP.24 VAL.41 GLN.34 LYS.23 ASN.21 PRO.30 THR.36 PHE.26 ALA.34 GLY.36 HIS.13 ILE.33 LEU.34 ARG.39 TRP.9 GLU.43 TYR.28 SER.28
2reoA TOT.199 # CYS.2 GLN.3 ILE.18 SER.10 VAL.8 MET.12 THR.13 PRO.13 LYS.11 HIS.9 PHE.13 ALA.8 GLY.7 ASP.15 GLU.12 LEU.16 ARG.3 TRP.6 ASN.9 TYR.11
1o65A TOT.213 # CYS.2 ILE.8 SER.14 GLN.11 MET.6 PRO.10 LYS.7 THR.8 PHE.8 ASN.4 HIS.6 GLY.16 ASP.14 LEU.21 ARG.14 TRP.6 ALA.18 VAL.14 GLU.16 TYR.10
3lylA TOT.236 # CYS.2 GLN.7 ILE.21 SER.22 VAL.18 LYS.17 PRO.4 THR.14 PHE.10 ALA.30 HIS.2 GLY.22 ASP.8 GLU.16 LEU.13 ARG.9 TRP.2 ASN.15 TYR.4
3ea6A TOT.214 # CYS.1 GLN.5 ASP.19 SER.15 VAL.10 LYS.26 PRO.3 THR.14 PHE.15 ASN.23 HIS.5 GLY.15 ILE.16 LEU.13 ARG.3 TRP.1 ALA.3 GLU.12 TYR.15
4oylA TOT.187 # CYS.4 HIS.1 SER.8 GLN.7 LYS.5 TRP.1 PRO.10 THR.11 PHE.6 ASN.13 GLY.24 ILE.14 LEU.15 ARG.10 ASP.5 ALA.26 VAL.11 GLU.10 TYR.5 MET.1
3nfiA TOT.215 # CYS.1 GLN.9 ILE.20 SER.15 VAL.14 LYS.22 ASN.10 PRO.14 THR.10 PHE.9 ALA.14 HIS.2 GLY.7 ASP.10 LEU.27 ARG.9 GLU.13 TYR.9
3sbtB TOT.300 # CYS.3 GLN.14 ILE.22 SER.21 VAL.15 LYS.19 PRO.11 GLY.12 THR.12 PHE.19 GLU.22 HIS.11 MET.15 ASP.19 LEU.22 ARG.9 TRP.4 ALA.9 ASN.22 TYR.19
2b4vA TOT.412 # CYS.9 GLN.14 ASP.27 SER.16 VAL.31 LYS.19 ILE.17 PRO.24 THR.23 PHE.20 ASN.18 GLY.27 HIS.14 LEU.34 ARG.36 TRP.7 ALA.32 GLU.21 TYR.23
3gqeA TOT.162 # CYS.2 ASP.9 SER.9 GLN.4 LYS.15 THR.8 PRO.6 HIS.4 PHE.4 ASN.9 GLY.13 ILE.11 LEU.12 ARG.6 TRP.1 ALA.19 VAL.13 GLU.10 TYR.5 MET.2
1jbwA TOT.403 # GLN.24 ASP.21 SER.17 VAL.35 LYS.13 ILE.31 PRO.20 THR.31 PHE.13 ALA.50 GLY.28 HIS.11 GLU.14 LEU.38 ARG.21 TRP.6 ASN.13 TYR.12 MET.5
2fxoA TOT.129 # CYS.2 ASP.9 SER.7 GLN.7 LYS.18 ASN.5 PRO.1 GLY.1 THR.3 PHE.1 ALA.11 MET.5 ILE.3 LEU.19 ARG.8 VAL.3 GLU.26
2f1rA TOT.148 # CYS.1 GLN.1 ASP.11 SER.10 VAL.17 LYS.10 THR.5 PRO.3 HIS.2 PHE.5 ALA.7 GLY.9 ILE.13 ASN.2 LEU.13 ARG.16 TRP.3 GLU.14 TYR.4 MET.2
2cyjA TOT.117 # HIS.4 SER.5 VAL.9 LYS.17 ILE.11 PRO.4 THR.4 PHE.3 ALA.2 GLY.8 ASP.7 LEU.15 ARG.5 TRP.1 GLU.16 TYR.3 MET.3
3gxvA TOT.122 # CYS.1 ILE.14 SER.5 GLN.6 LYS.10 PRO.6 THR.1 PHE.6 ALA.9 GLY.3 HIS.6 GLU.14 LEU.12 ARG.4 ASP.7 VAL.6 ASN.7 TYR.3 MET.2
2o1xA TOT.578 # CYS.2 ILE.30 SER.27 GLN.12 GLY.61 THR.32 PRO.28 LYS.20 HIS.20 PHE.17 ALA.65 MET.15 ASP.39 ASN.15 LEU.55 ARG.33 TRP.7 VAL.54 GLU.33 TYR.13
4ca1A TOT.189 # CYS.9 HIS.9 SER.12 GLN.10 LYS.7 PRO.8 ASP.7 THR.11 PHE.11 ASN.8 GLY.11 ILE.12 LEU.17 ARG.7 TRP.3 ALA.15 VAL.9 GLU.13 TYR.3 MET.7
2p0yA TOT.233 # CYS.3 GLN.10 ILE.16 SER.14 VAL.32 LYS.8 PRO.9 THR.12 PHE.9 GLU.9 HIS.9 GLY.18 ASP.18 LEU.22 ARG.11 TRP.2 ALA.13 ASN.14 TYR.4
1qwrA TOT.312 # CYS.7 GLN.6 ILE.23 SER.20 VAL.17 LYS.23 ASN.8 PRO.15 ARG.11 THR.23 PHE.12 ALA.17 GLY.28 HIS.9 LEU.24 TRP.6 ASP.20 GLU.28 TYR.15
4i86A TOT.102 # GLN.3 ASP.4 SER.6 VAL.9 LYS.3 ASN.4 PRO.6 THR.6 PHE.3 ALA.8 GLY.10 HIS.2 ILE.12 LEU.8 ARG.7 TRP.2 GLU.6 TYR.1 MET.2
2wj5A TOT.96 # ASP.5 GLN.3 VAL.11 LYS.2 ILE.3 PRO.10 THR.3 PHE.4 ALA.11 GLY.6 LEU.6 HIS.6 SER.9 ARG.6 GLU.8 TYR.2 MET.1
3mioA TOT.193 # CYS.3 HIS.5 GLN.2 VAL.16 LYS.5 ILE.12 PRO.8 GLY.16 THR.13 PHE.4 ALA.26 MET.7 ASP.19 ASN.2 LEU.17 ARG.16 TRP.1 GLU.12 TYR.2 SER.7
2bbaA TOT.176 # CYS.4 ASP.8 SER.7 GLN.5 LYS.8 ILE.1 PRO.8 THR.17 PHE.7 ALA.18 GLY.11 HIS.10 ASN.3 LEU.21 ARG.8 TRP.5 VAL.13 GLU.12 TYR.7 MET.3
1udsA TOT.254 # CYS.3 MET.6 GLN.12 ILE.24 SER.15 VAL.20 LYS.16 PRO.5 THR.18 TRP.4 ASN.6 GLY.22 HIS.3 LEU.18 ARG.16 ASP.15 ALA.18 GLU.23 TYR.4 PHE.6
3f2eA TOT.82 # MET.1 ASP.2 GLN.3 VAL.8 LYS.2 PRO.4 THR.6 PHE.2 ALA.11 GLY.10 ILE.6 GLU.1 LEU.7 ARG.3 ASN.6 TYR.5 SER.5
1dlyA TOT.121 # ASP.9 VAL.12 GLN.5 LYS.8 ASN.3 PRO.5 GLY.6 THR.9 PHE.6 ALA.15 HIS.4 MET.4 ILE.2 LEU.10 ARG.5 TRP.1 GLU.6 TYR.3 SER.8
2xbuA TOT.195 # CYS.2 GLN.9 ILE.19 SER.7 VAL.11 LYS.16 ASN.8 PRO.10 THR.11 PHE.9 ALA.15 GLY.9 HIS.4 LEU.15 ARG.8 TRP.3 ASP.15 GLU.13 TYR.8 MET.3
4gvoA TOT.236 # CYS.1 MET.3 ILE.11 VAL.18 GLN.10 LYS.28 PRO.4 THR.17 PHE.12 ALA.15 HIS.1 GLY.17 ASP.17 GLU.15 LEU.22 ARG.4 TRP.1 ASN.17 TYR.7 SER.16
2rfgA TOT.288 # CYS.4 GLN.14 ILE.22 SER.14 VAL.21 MET.7 ASN.11 PRO.18 LYS.10 THR.12 PHE.7 ALA.37 HIS.8 GLY.22 ASP.13 LEU.26 ARG.15 TRP.1 GLU.17 TYR.9
3a43A TOT.132 # CYS.4 GLN.3 ILE.9 SER.3 VAL.16 LYS.10 THR.2 PRO.2 GLY.10 HIS.4 PHE.8 ALA.15 MET.1 ASP.7 ASN.2 LEU.7 ARG.6 TRP.2 GLU.18 TYR.3
3tacB TOT.285 # CYS.3 ILE.15 SER.18 GLN.13 MET.9 TRP.9 PRO.11 LYS.11 THR.12 PHE.4 ASN.14 GLY.13 HIS.9 LEU.39 ARG.23 ASP.13 ALA.23 VAL.14 GLU.24 TYR.8
2z17A TOT.94 # CYS.3 ILE.6 SER.9 GLN.8 GLY.6 PRO.2 LYS.4 THR.7 PHE.5 ASN.6 HIS.1 MET.1 ASP.4 LEU.8 ARG.3 TRP.1 ALA.5 VAL.6 GLU.7 TYR.2
2ntxA TOT.282 # ILE.19 SER.26 GLN.14 LYS.15 PRO.14 THR.11 PHE.11 ALA.21 HIS.3 GLY.14 ASP.20 GLU.21 LEU.37 ARG.16 TRP.5 VAL.19 ASN.9 TYR.7
3g17A TOT.282 # CYS.3 ASP.17 SER.8 VAL.22 GLN.24 LYS.7 ILE.30 PRO.10 THR.22 PHE.7 ALA.21 GLY.17 HIS.11 GLU.11 LEU.27 ARG.13 TRP.1 ASN.10 TYR.17 MET.4
3o36A TOT.184 # CYS.12 MET.3 ILE.7 VAL.9 GLN.4 LYS.16 PRO.14 THR.7 PHE.10 GLU.18 HIS.4 GLY.5 ASP.12 LEU.20 ARG.5 TRP.2 ALA.7 ASN.10 TYR.8 SER.11
1o8xA TOT.143 # CYS.2 MET.1 ASP.10 VAL.12 GLN.4 LYS.11 ASN.2 PRO.9 THR.6 PHE.13 ALA.12 HIS.2 GLY.11 ILE.4 LEU.10 ARG.5 TRP.4 GLU.13 TYR.4 SER.8
4oggA TOT.384 # CYS.12 ILE.18 SER.19 GLN.13 LYS.19 ASN.11 PRO.22 THR.24 PHE.18 ALA.38 HIS.11 GLY.36 ASP.22 LEU.34 ARG.10 TRP.3 VAL.35 GLU.21 TYR.13 MET.5
4ng7A TOT.287 # ILE.19 VAL.25 GLN.17 MET.14 ASN.10 PRO.14 LYS.24 THR.12 PHE.10 ALA.28 HIS.8 GLY.21 ASP.18 LEU.22 ARG.8 TRP.3 GLU.18 TYR.8 SER.8
1novA TOT.306 # CYS.7 MET.7 ILE.15 ASN.18 GLN.11 LYS.12 PRO.24 THR.23 PHE.17 ALA.40 HIS.2 GLY.20 ASP.13 LEU.24 ARG.6 TRP.1 VAL.20 GLU.12 TYR.12 SER.22
1m40A TOT.263 # CYS.2 HIS.6 SER.15 GLN.8 MET.8 ASN.8 PRO.12 LYS.11 THR.21 PHE.5 ALA.25 GLY.21 ILE.15 LEU.31 ARG.18 TRP.4 ASP.16 VAL.13 GLU.20 TYR.4
1r9wA TOT.138 # CYS.5 MET.3 ILE.12 VAL.9 GLN.6 LYS.8 PRO.6 ARG.6 THR.13 PHE.5 ALA.9 GLY.9 HIS.2 GLU.4 LEU.18 TRP.4 ASP.5 ASN.2 TYR.5 SER.7
3gwoA TOT.50 # ILE.5 SER.4 GLN.4 LYS.2 THR.2 PHE.1 ALA.1 HIS.1 ASP.2 GLU.5 LEU.7 ARG.1 TRP.6 ASN.7 TYR.2
4f0fA TOT.274 # CYS.4 GLN.9 ILE.21 SER.17 VAL.16 LYS.18 TRP.3 PRO.18 GLY.19 THR.8 PHE.12 ALA.11 MET.10 HIS.8 GLU.25 LEU.28 ARG.12 ASP.13 ASN.12 TYR.10
3l4yA TOT.863 # CYS.13 GLN.34 ASP.52 SER.56 VAL.60 GLY.59 ILE.36 PRO.50 LYS.30 THR.57 PHE.47 ALA.48 MET.13 HIS.23 GLU.46 LEU.78 ARG.38 TRP.21 ASN.63 TYR.39
2x9zA TOT.257 # GLN.5 ASP.24 ASN.20 VAL.27 LYS.24 PRO.16 THR.31 PHE.6 ALA.26 HIS.2 GLY.17 ILE.9 LEU.14 ARG.3 TRP.3 GLU.16 TYR.9 SER.5
2zztA TOT.69 # ASP.9 SER.1 VAL.8 LYS.3 ASN.2 PRO.3 THR.4 PHE.3 ALA.2 HIS.4 GLY.3 ILE.7 LEU.5 ARG.7 GLU.6 TYR.2
4c2m4 TOT.54 # GLN.1 ILE.4 SER.8 VAL.5 LYS.5 PRO.2 THR.1 PHE.1 GLU.11 HIS.1 GLY.1 ASP.4 LEU.3 ARG.1 ALA.1 ASN.4 TYR.1
4mdwA TOT.125 # ASP.9 VAL.13 GLN.6 LYS.1 ILE.6 PRO.4 THR.15 ALA.11 GLY.13 HIS.7 GLU.12 LEU.4 ARG.1 TRP.2 ASN.4 TYR.6 SER.11
3tguI TOT.34 # CYS.1 ILE.1 SER.6 VAL.3 MET.1 PRO.2 ALA.6 GLY.2 ASP.1 GLU.1 LEU.5 ARG.4 ASN.1
4c2m3 TOT.145 # CYS.1 GLN.5 ILE.9 SER.14 VAL.10 LYS.18 ASN.6 PRO.9 GLY.3 HIS.4 PHE.7 THR.9 MET.3 ASP.14 LEU.13 ARG.2 TRP.1 ALA.7 GLU.7 TYR.3
4trrA TOT.246 # CYS.1 HIS.8 GLN.7 VAL.30 LYS.15 TRP.2 PRO.6 GLY.24 THR.13 PHE.9 ALA.35 MET.6 ILE.15 GLU.10 LEU.17 ARG.4 ASP.13 ASN.12 TYR.4 SER.15
2gq1A TOT.304 # CYS.6 GLN.7 ILE.20 SER.18 VAL.23 LYS.21 PRO.13 HIS.9 PHE.17 THR.16 GLY.25 ASP.17 GLU.25 LEU.25 ARG.15 ALA.21 ASN.12 TYR.14
4c2mC TOT.305 # CYS.5 GLN.8 ASP.23 SER.19 VAL.24 GLY.13 PRO.19 LYS.22 THR.13 PHE.17 ALA.23 HIS.5 MET.3 ILE.22 GLU.21 LEU.23 ARG.17 TRP.2 ASN.18 TYR.8
2odlA TOT.368 # GLN.17 ILE.42 SER.25 VAL.25 LYS.30 PRO.3 THR.23 PHE.10 ASN.35 HIS.3 GLY.49 ASP.23 LEU.24 ARG.7 TRP.3 ALA.28 GLU.19 TYR.2
3fsoA TOT.108 # HIS.3 SER.7 GLN.10 LYS.4 TRP.1 PRO.7 THR.4 PHE.5 ALA.4 GLY.9 ILE.6 ASN.2 LEU.9 ARG.10 ASP.6 VAL.11 GLU.7 TYR.2 MET.1
4c2mI TOT.124 # CYS.8 ASP.6 SER.12 GLN.4 LYS.12 ILE.3 PRO.4 THR.10 PHE.5 ASN.9 GLY.7 HIS.1 LEU.11 ARG.3 ALA.8 VAL.9 GLU.7 TYR.4 MET.1
4c2mK TOT.101 # CYS.2 ILE.7 SER.7 GLN.4 LYS.8 PRO.4 THR.8 PHE.3 ASN.4 GLY.5 HIS.2 LEU.10 ARG.3 ASP.8 ALA.5 VAL.6 GLU.9 TYR.3 MET.3
3bhoA TOT.193 # CYS.1 ILE.12 GLN.8 VAL.10 MET.3 PRO.17 LYS.10 THR.11 PHE.12 GLU.15 HIS.3 GLY.13 ASP.6 LEU.26 ARG.10 TRP.3 ALA.8 ASN.10 TYR.10 SER.5
4nngA TOT.157 # ASP.10 SER.4 GLN.7 MET.5 PRO.4 LYS.8 THR.5 PHE.8 ALA.16 HIS.7 GLY.10 ILE.8 GLU.21 LEU.8 ARG.11 TRP.2 VAL.13 ASN.4 TYR.6
2o04A TOT.399 # CYS.1 GLN.16 ASP.30 SER.47 VAL.20 LYS.26 ILE.25 PRO.14 THR.29 PHE.8 ALA.27 GLY.40 HIS.11 GLU.7 LEU.18 ARG.10 TRP.7 ASN.35 TYR.25 MET.3
1wpwA TOT.336 # CYS.2 MET.8 GLN.4 ASP.23 ASN.17 VAL.27 LYS.25 THR.11 PRO.11 HIS.3 PHE.9 ALA.36 GLY.26 ILE.33 LEU.27 ARG.18 GLU.22 TYR.16 SER.18
1it2A TOT.146 # CYS.2 ILE.17 SER.13 GLN.8 LYS.18 ASN.7 PRO.7 THR.5 PHE.10 ALA.6 HIS.2 GLY.4 ASP.8 LEU.13 ARG.2 TRP.2 VAL.7 GLU.10 TYR.4 MET.1
4nimA TOT.231 # CYS.3 ASP.12 SER.14 GLN.8 LYS.5 ASN.9 PRO.7 THR.10 PHE.12 ALA.34 GLY.24 HIS.1 ILE.14 LEU.24 ARG.17 TRP.2 VAL.18 GLU.10 TYR.3 MET.4
1wdcA TOT.64 # GLN.5 ILE.7 SER.4 VAL.3 LYS.8 PRO.1 HIS.1 PHE.1 ALA.2 GLY.2 ASP.2 GLU.1 LEU.9 ARG.8 TRP.4 ASN.2 TYR.3 MET.1
1wdcB TOT.141 # ASP.13 SER.8 GLN.5 LYS.15 PRO.5 THR.7 PHE.11 GLU.15 GLY.9 ILE.9 LEU.10 ARG.4 ALA.9 VAL.4 ASN.6 TYR.2 MET.9
1wdcC TOT.152 # CYS.3 ASP.19 VAL.10 GLN.4 LYS.9 LEU.15 PRO.5 THR.5 PHE.12 ASN.3 HIS.2 GLY.15 ILE.5 SER.4 ARG.6 TRP.1 ALA.9 GLU.17 TYR.4 MET.4
2v4iB TOT.194 # CYS.3 GLN.4 ASP.20 SER.6 VAL.21 LYS.6 ILE.9 PRO.5 THR.15 PHE.8 ALA.28 GLY.16 HIS.3 GLU.11 LEU.16 ARG.12 TRP.1 ASN.5 TYR.3 MET.2
3hf5A TOT.115 # CYS.2 MET.5 ILE.7 GLN.6 VAL.10 LYS.7 TRP.2 PRO.5 THR.3 PHE.7 ALA.5 GLY.8 HIS.5 GLU.13 LEU.8 ARG.6 ASP.4 ASN.1 TYR.6 SER.5
2v4iA TOT.161 # CYS.1 GLN.2 ILE.5 SER.6 VAL.21 GLY.20 ASN.3 PRO.9 LYS.2 ASP.6 THR.13 PHE.5 ALA.25 MET.5 HIS.2 LEU.12 ARG.12 TRP.1 GLU.10 TYR.1
1cs6A TOT.382 # CYS.8 HIS.6 SER.31 GLN.16 LYS.18 ASN.13 PRO.23 GLY.26 THR.24 PHE.18 ALA.35 MET.5 ILE.16 LEU.28 ARG.23 ASP.20 TRP.8 VAL.23 GLU.27 TYR.14
3h3lA TOT.215 # CYS.5 ILE.16 SER.10 GLN.11 LYS.13 PRO.13 THR.10 PHE.11 ALA.9 HIS.3 GLY.24 ASP.17 GLU.9 LEU.11 ARG.8 TRP.6 VAL.13 ASN.12 TYR.14
2qu7A TOT.274 # CYS.3 GLN.12 ILE.29 SER.24 VAL.19 LYS.25 ASN.15 PRO.9 THR.18 PHE.8 ALA.16 HIS.6 GLY.11 ASP.11 LEU.26 ARG.6 TRP.2 GLU.22 TYR.8 MET.4
3dl3A TOT.95 # CYS.1 ILE.7 VAL.8 GLN.6 LYS.3 PRO.6 THR.8 PHE.7 ASN.7 HIS.3 GLY.4 ASP.5 LEU.3 ARG.3 TRP.3 ALA.7 GLU.6 TYR.3 SER.5
3h4xA TOT.315 # CYS.2 GLN.5 HIS.12 SER.17 VAL.16 LYS.13 ILE.7 PRO.19 THR.18 PHE.11 ALA.46 GLY.29 ASP.25 GLU.15 LEU.29 ARG.18 TRP.8 ASN.11 TYR.11 MET.3
4hqaA TOT.110 # CYS.8 GLN.4 ASP.5 SER.3 VAL.11 LYS.5 PRO.3 THR.2 PHE.7 ALA.12 HIS.1 GLY.6 ILE.7 GLU.9 LEU.7 ARG.9 ASN.5 TYR.3 MET.3
3wj1A TOT.304 # CYS.3 GLN.7 ASP.22 SER.23 VAL.25 LYS.16 ASN.10 PRO.18 THR.7 PHE.18 ALA.27 HIS.3 GLY.25 ILE.24 LEU.29 ARG.16 TRP.2 GLU.13 TYR.14 MET.2
2gncA TOT.55 # GLN.1 HIS.3 SER.4 VAL.4 LYS.3 PRO.2 ASP.3 PHE.3 GLU.4 GLY.5 ILE.3 LEU.5 ARG.4 TRP.2 ALA.5 ASN.1 TYR.3
3bhpA TOT.50 # ILE.4 SER.4 GLN.3 LYS.8 THR.2 PHE.1 GLU.6 GLY.2 LEU.4 ARG.3 ALA.7 VAL.2 ASN.3 TYR.1
3ksxA TOT.289 # MET.2 HIS.3 GLN.17 VAL.20 LYS.12 ASN.5 PRO.21 THR.13 PHE.9 ALA.45 GLY.23 ILE.10 LEU.40 ARG.19 TRP.7 ASP.11 GLU.8 TYR.6 SER.18
3id1A TOT.94 # ILE.7 VAL.9 GLN.3 MET.1 ASN.1 PRO.7 LYS.4 THR.5 PHE.2 ALA.10 HIS.1 GLY.7 ASP.10 LEU.6 ARG.7 TRP.2 GLU.7 SER.5
4m5rA TOT.201 # CYS.4 GLN.3 HIS.6 SER.12 VAL.9 LYS.14 TRP.2 PRO.6 GLY.9 THR.12 PHE.13 ASN.7 MET.7 ILE.18 LEU.11 ARG.15 ASP.11 ALA.11 GLU.24 TYR.7
4kvgB TOT.246 # CYS.9 ASP.16 GLN.10 VAL.18 LYS.25 ILE.12 PRO.6 GLY.8 THR.10 PHE.10 ASN.11 MET.6 HIS.5 LEU.23 ARG.13 TRP.4 ALA.12 GLU.20 TYR.17 SER.11
4kvgA TOT.165 # CYS.5 MET.5 ASP.12 GLN.13 VAL.17 LYS.10 PRO.2 THR.8 PHE.6 ASN.8 HIS.1 GLY.10 ILE.9 LEU.15 ARG.9 TRP.1 ALA.8 GLU.12 TYR.6 SER.8
2pw9A TOT.231 # CYS.5 GLN.6 ILE.19 SER.18 VAL.17 GLY.19 PRO.14 LYS.9 THR.7 PHE.7 ALA.19 HIS.6 MET.6 ASP.8 GLU.16 LEU.23 ARG.16 TRP.1 ASN.8 TYR.7
3c9aA TOT.208 # CYS.16 MET.2 HIS.8 VAL.13 GLN.10 LYS.10 TRP.2 PRO.14 THR.15 PHE.5 GLU.12 GLY.10 ILE.9 LEU.15 ARG.17 ASP.13 ALA.8 ASN.8 TYR.9 SER.12
2q49A TOT.345 # CYS.4 ILE.25 SER.20 GLN.15 LYS.18 ASN.11 PRO.20 ASP.15 THR.20 PHE.9 ALA.25 GLY.25 HIS.13 LEU.35 ARG.17 TRP.1 VAL.29 GLU.24 TYR.11 MET.8
4g6iA TOT.195 # CYS.2 GLN.5 ILE.13 SER.10 VAL.17 MET.2 ASN.6 PRO.5 LYS.7 THR.12 PHE.6 ALA.19 HIS.3 GLY.18 ASP.11 LEU.21 ARG.12 TRP.4 GLU.19 TYR.3
1wnyA TOT.180 # GLN.4 ASP.7 SER.4 VAL.13 LYS.12 ASN.2 PRO.15 THR.11 PHE.8 ALA.16 HIS.2 GLY.18 ILE.4 LEU.27 ARG.8 TRP.2 GLU.18 TYR.9
3hoaA TOT.509 # CYS.1 ASP.25 SER.18 GLN.15 MET.7 ILE.12 PRO.35 LYS.16 THR.17 PHE.26 ALA.59 GLY.38 HIS.14 ASN.7 LEU.63 ARG.45 TRP.11 VAL.25 GLU.53 TYR.22
3hnmA TOT.164 # CYS.3 GLN.4 ASP.12 SER.6 VAL.14 LYS.9 PRO.11 THR.10 PHE.8 GLU.8 HIS.5 GLY.14 ILE.7 LEU.9 ARG.5 TRP.9 ALA.10 ASN.10 TYR.10
3ub1A TOT.224 # ASP.18 SER.16 GLN.12 LYS.14 ASN.16 PRO.7 THR.17 PHE.19 ALA.17 GLY.9 ILE.12 LEU.14 ARG.6 TRP.1 VAL.19 GLU.11 TYR.16
1cztA TOT.160 # CYS.3 ILE.15 SER.13 GLN.7 VAL.6 LYS.17 PRO.6 ASP.4 THR.9 PHE.7 ALA.7 GLY.10 HIS.2 GLU.9 LEU.10 ARG.7 TRP.7 ASN.12 TYR.6 MET.3
3r9vA TOT.198 # ARG.1 ILE.10 VAL.14 GLN.11 MET.5 ASN.21 PRO.4 LYS.17 HIS.2 THR.8 ALA.13 GLY.14 ASP.11 LEU.20 PHE.3 TRP.4 GLU.12 TYR.9 SER.19
2r8rA TOT.203 # HIS.5 VAL.18 GLN.15 LYS.5 ASN.5 PRO.9 THR.15 PHE.4 ALA.27 GLY.14 ASP.11 ILE.5 LEU.30 ARG.16 TRP.2 GLU.15 TYR.4 SER.3
4oo0A TOT.201 # GLN.5 ASP.11 SER.10 VAL.15 LYS.4 ILE.8 PRO.13 THR.12 PHE.7 ALA.40 GLY.14 HIS.2 LEU.24 ARG.17 GLU.12 TYR.5 MET.2
3g7mA TOT.151 # CYS.10 ILE.4 SER.13 GLN.6 LYS.5 PRO.10 THR.13 PHE.4 ALA.13 HIS.2 GLY.21 ASP.5 GLU.2 LEU.11 ARG.6 TRP.3 VAL.12 ASN.5 TYR.4 MET.2
2b1mA TOT.222 # CYS.6 GLN.9 ILE.19 SER.23 VAL.14 LYS.11 PRO.5 THR.6 PHE.8 ALA.16 HIS.5 GLY.26 ASP.14 GLU.15 LEU.9 ARG.3 TRP.8 ASN.11 TYR.13 MET.1
3c6aA TOT.198 # CYS.4 MET.6 ILE.17 GLN.7 VAL.10 LYS.16 ASN.7 PRO.4 THR.12 PHE.11 ALA.10 HIS.5 GLY.12 ASP.15 LEU.18 ARG.6 TRP.1 GLU.13 TYR.10 SER.14
1ogyB TOT.124 # CYS.4 GLN.6 ASP.7 SER.7 VAL.8 GLY.5 ASN.6 PRO.14 THR.8 PHE.3 ALA.11 MET.5 HIS.4 ILE.5 LEU.9 ARG.11 GLU.7 TYR.4
4mo0A TOT.78 # CYS.2 HIS.1 SER.3 GLN.2 VAL.5 LYS.12 ILE.9 THR.5 PHE.3 ASN.1 GLY.6 ASP.6 LEU.6 ARG.5 ALA.3 GLU.6 TYR.1 MET.2
3eziA TOT.104 # GLN.9 ILE.3 SER.8 VAL.5 LYS.4 TRP.1 PRO.3 THR.5 PHE.3 ALA.14 GLY.6 HIS.1 GLU.7 LEU.13 ARG.8 ASP.6 ASN.3 TYR.2 MET.3
2doqD TOT.81 # ASP.3 SER.6 GLN.8 LYS.6 ASN.6 PRO.1 THR.5 PHE.8 ALA.8 GLY.1 ILE.2 LEU.8 ARG.6 TRP.3 VAL.2 GLU.6 TYR.2
1booA TOT.267 # CYS.1 GLN.2 ASP.13 SER.25 VAL.18 LYS.18 PRO.17 GLY.15 THR.10 PHE.20 ASN.16 HIS.2 MET.7 ILE.19 LEU.23 ARG.11 TRP.7 ALA.16 GLU.18 TYR.9
1x6zA TOT.118 # CYS.2 GLN.2 ILE.5 SER.8 VAL.5 LYS.10 PRO.6 THR.15 PHE.3 GLU.7 GLY.13 ASP.8 LEU.9 ARG.4 TRP.2 ALA.15 ASN.3 MET.1
1xm7A TOT.186 # CYS.4 HIS.10 SER.4 VAL.7 GLN.1 LYS.17 ILE.19 PRO.7 THR.5 PHE.9 ALA.5 GLY.7 ASP.14 ASN.13 LEU.16 ARG.10 TRP.4 GLU.18 TYR.12 MET.4
3r3tA TOT.92 # GLN.1 ILE.11 ASN.9 VAL.6 LYS.6 PRO.1 ASP.3 THR.2 PHE.3 ALA.10 GLY.5 HIS.1 LEU.7 ARG.8 TRP.1 GLU.14 TYR.4
3lczA TOT.53 # CYS.4 ILE.4 SER.2 GLN.1 LYS.4 ASN.2 PRO.4 THR.5 PHE.1 ALA.2 GLY.5 HIS.3 LEU.5 ARG.1 ASP.2 VAL.2 GLU.5 MET.1
4djaA TOT.509 # CYS.9 ILE.25 SER.22 GLN.12 VAL.25 LYS.22 TRP.10 PRO.20 THR.20 PHE.29 ALA.53 GLY.36 HIS.14 GLU.31 LEU.43 ARG.41 ASP.39 ASN.23 TYR.21 MET.14
2pqnB TOT.20 # ILE.2 SER.2 GLN.1 LYS.1 PRO.1 THR.1 PHE.2 ALA.2 GLY.1 LEU.3 GLU.3 TYR.1
2wfiA TOT.171 # CYS.6 MET.2 ILE.7 GLN.8 VAL.13 LYS.12 PRO.7 THR.9 PHE.16 ASN.8 HIS.6 GLY.18 ASP.8 LEU.9 ARG.9 ALA.7 GLU.13 TYR.2 SER.11
3p24A TOT.357 # CYS.4 GLN.10 ILE.23 SER.24 VAL.22 LYS.24 THR.19 PRO.12 GLY.21 HIS.7 PHE.14 ALA.29 MET.10 ASP.27 GLU.19 LEU.26 ARG.13 TRP.4 ASN.27 TYR.22
1mtyD TOT.512 # CYS.7 ASP.26 ASN.29 GLN.21 GLY.33 PRO.21 LYS.29 THR.25 PHE.24 ALA.47 HIS.14 MET.11 ILE.20 LEU.39 ARG.27 TRP.21 VAL.31 GLU.40 TYR.25 SER.22
1mtyG TOT.162 # ILE.6 GLN.4 VAL.11 GLY.7 PRO.5 LYS.14 THR.8 PHE.7 GLU.14 HIS.6 MET.5 ASP.11 LEU.15 ARG.12 TRP.3 ALA.15 ASN.10 TYR.6 SER.3
1b4fA TOT.74 # ASP.4 VAL.6 GLN.7 GLY.4 PRO.1 LYS.4 THR.4 PHE.4 ASN.4 HIS.1 MET.6 ILE.5 LEU.4 ARG.2 TRP.1 ALA.5 GLU.4 TYR.2 SER.6
4jz6A TOT.484 # CYS.9 MET.12 ILE.35 GLN.17 VAL.40 LYS.25 ASN.18 PRO.21 THR.29 PHE.21 ALA.54 HIS.7 GLY.38 ASP.24 LEU.32 ARG.24 TRP.5 GLU.33 TYR.8 SER.32
3oljA TOT.286 # CYS.5 ILE.22 GLY.12 SER.15 GLN.7 LYS.17 ASN.9 PRO.10 ASP.13 THR.8 PHE.25 ALA.20 MET.11 HIS.7 LEU.24 ARG.16 TRP.6 VAL.18 GLU.33 TYR.8
4nk6A TOT.401 # CYS.1 MET.13 ILE.33 VAL.34 GLN.10 LYS.10 PHE.12 PRO.15 THR.22 TRP.7 ASN.29 GLY.37 HIS.7 LEU.31 ARG.21 ASP.22 ALA.21 GLU.24 TYR.19 SER.33
3i4fA TOT.233 # CYS.2 GLN.6 HIS.6 SER.9 VAL.21 LYS.16 TRP.2 PRO.4 THR.20 PHE.9 ALA.21 GLY.19 ILE.18 GLU.18 LEU.16 ARG.9 ASP.13 ASN.7 TYR.9 MET.8
1trbA TOT.315 # CYS.3 ILE.22 SER.14 GLN.10 LYS.11 PRO.9 THR.25 PHE.10 GLU.22 HIS.10 GLY.35 ASP.17 LEU.28 ARG.16 TRP.1 ALA.30 VAL.18 ASN.18 TYR.9 MET.7
3gbhA TOT.200 # GLN.11 ASP.19 SER.14 VAL.13 LYS.16 PRO.7 THR.8 PHE.7 ALA.15 HIS.2 GLY.9 ILE.19 GLU.14 LEU.16 ARG.9 TRP.2 ASN.11 TYR.8
2c4wA TOT.164 # CYS.1 ASP.5 SER.6 GLN.8 VAL.10 LYS.7 THR.6 PRO.7 HIS.5 PHE.8 ASN.11 GLY.17 ILE.17 LEU.12 ARG.4 ALA.14 GLU.13 TYR.4 MET.9
3lm3A TOT.418 # CYS.6 GLN.11 ASP.30 SER.18 VAL.22 LYS.23 PRO.22 THR.20 PHE.20 GLU.33 HIS.14 GLY.36 ILE.23 LEU.31 ARG.29 TRP.15 ALA.23 ASN.23 TYR.19
1fnoA TOT.388 # CYS.3 HIS.14 GLN.14 VAL.32 LYS.26 TRP.2 PRO.19 THR.22 PHE.15 ASN.15 GLY.41 ILE.25 LEU.35 ARG.14 ASP.22 ALA.33 GLU.32 TYR.10 SER.14
4qmiA TOT.228 # CYS.2 ASP.12 GLN.10 VAL.12 LYS.24 PRO.11 GLY.14 THR.12 PHE.4 ALA.18 HIS.3 MET.7 ILE.15 GLU.17 LEU.30 ARG.8 TRP.4 ASN.14 TYR.2 SER.9
4bspA TOT.88 # CYS.14 GLN.1 HIS.3 SER.4 VAL.3 LYS.9 ASN.5 PRO.6 THR.1 PHE.4 ALA.3 GLY.6 ILE.4 LEU.8 ARG.4 ASP.3 GLU.6 TYR.3 MET.1
3wolA TOT.696 # CYS.4 ASP.46 SER.28 GLN.29 LYS.46 ASN.33 PRO.34 THR.32 PHE.24 ALA.94 HIS.7 GLY.61 ILE.22 LEU.66 ARG.35 TRP.13 VAL.40 GLU.39 TYR.28 MET.15
1yjgA TOT.157 # ILE.13 SER.11 VAL.10 LYS.24 THR.15 PHE.2 GLU.6 HIS.1 GLY.9 ASP.17 LEU.14 ALA.28 ASN.6 TYR.1
1zkoA TOT.123 # CYS.1 ASP.9 GLN.5 VAL.14 LYS.11 ASN.3 PRO.4 THR.5 PHE.2 ALA.9 GLY.8 HIS.7 ILE.6 LEU.10 ARG.1 TRP.2 GLU.17 TYR.4 SER.5
4gq4A TOT.464 # CYS.7 GLN.21 HIS.12 SER.30 VAL.38 LYS.20 ASN.13 PRO.18 THR.19 PHE.19 ALA.42 GLY.31 ASP.24 ILE.18 LEU.60 ARG.26 TRP.8 GLU.31 TYR.19 MET.8
4fzvB TOT.137 # CYS.5 GLN.8 ILE.9 SER.7 VAL.8 LYS.6 ASN.2 PRO.10 GLY.8 THR.7 PHE.6 ALA.5 HIS.3 MET.3 ASP.5 LEU.17 ARG.9 GLU.12 TYR.7
4fzvA TOT.323 # CYS.10 ASP.18 VAL.26 GLN.17 LYS.8 ILE.12 PRO.18 THR.13 PHE.15 ALA.28 GLY.19 HIS.8 GLU.15 LEU.42 ARG.18 TRP.6 ASN.14 TYR.10 SER.26
4c9yA TOT.118 # CYS.2 GLN.2 ILE.12 SER.7 VAL.8 LYS.13 ASN.7 PRO.3 THR.9 PHE.6 ALA.3 GLY.5 HIS.4 LEU.9 ARG.8 ASP.6 GLU.8 TYR.6
1x0pA TOT.141 # CYS.3 GLN.6 ILE.8 SER.11 VAL.4 LYS.6 ASN.4 PRO.4 GLY.9 THR.8 PHE.6 ALA.8 HIS.3 MET.7 ASP.9 LEU.16 ARG.13 TRP.1 GLU.9 TYR.6
2yzkA TOT.173 # GLN.2 ASP.9 SER.15 VAL.22 LYS.9 ASN.1 PRO.5 THR.9 PHE.1 ALA.15 HIS.1 GLY.24 ILE.5 LEU.26 ARG.15 TRP.2 GLU.8 TYR.4
2qimA TOT.157 # GLN.3 ILE.17 SER.8 VAL.10 LYS.15 PRO.6 THR.11 PHE.6 ASN.6 HIS.2 GLY.18 ASP.8 LEU.8 ARG.1 ALA.15 GLU.16 TYR.7
3irbA TOT.129 # CYS.5 ILE.11 SER.6 GLN.4 LYS.6 PRO.5 THR.2 PHE.6 GLU.11 HIS.1 GLY.11 ASP.6 LEU.9 ARG.6 TRP.2 ALA.9 VAL.11 ASN.8 TYR.10
4u7uE TOT.353 # CYS.2 HIS.8 SER.27 VAL.24 GLN.22 LYS.21 TRP.5 PRO.7 THR.13 PHE.13 ALA.41 GLY.23 ILE.20 GLU.17 LEU.31 ARG.17 ASP.23 ASN.18 TYR.7 MET.14
4u7uB TOT.156 # CYS.2 ASP.10 SER.6 GLN.12 LYS.5 PHE.5 PRO.6 HIS.3 THR.7 ALA.13 GLY.7 ILE.8 GLU.8 LEU.19 ARG.19 TRP.5 VAL.7 ASN.7 TYR.2 MET.5
4u7uA TOT.473 # CYS.11 MET.9 GLN.25 ILE.29 ASN.28 VAL.33 LYS.17 PRO.28 THR.25 PHE.24 ALA.37 HIS.13 GLY.35 ASP.17 LEU.51 ARG.25 TRP.8 GLU.24 TYR.10 SER.24
4u7uK TOT.216 # CYS.5 ILE.8 SER.15 GLN.9 LYS.4 ASN.1 PRO.13 GLY.17 THR.18 PHE.7 ALA.14 HIS.6 MET.4 ASP.11 LEU.28 ARG.19 TRP.4 VAL.11 GLU.13 TYR.9
3mxmA TOT.226 # CYS.7 GLN.13 ILE.8 SER.20 VAL.10 LYS.7 TRP.3 PRO.21 THR.13 PHE.6 GLU.11 GLY.13 HIS.7 LEU.32 ARG.14 ASP.12 ALA.19 ASN.3 TYR.5 MET.2
3p96A TOT.384 # CYS.3 ASP.26 GLN.8 VAL.49 MET.6 ASN.6 PRO.16 LYS.4 THR.23 PHE.9 ALA.55 HIS.6 GLY.34 ILE.24 LEU.44 ARG.29 GLU.23 TYR.5 SER.14
2cbzA TOT.230 # CYS.3 MET.5 GLN.10 ASP.11 SER.20 VAL.20 LYS.10 PRO.10 HIS.4 THR.9 ALA.20 GLY.20 ILE.16 GLU.13 LEU.23 ARG.10 TRP.2 ASN.9 TYR.8 PHE.7
3w0eA TOT.68 # CYS.2 ILE.7 SER.3 GLN.5 GLY.2 ASN.6 PRO.4 LYS.2 THR.3 PHE.1 ALA.8 HIS.2 MET.2 ASP.3 LEU.4 ARG.2 VAL.4 GLU.6 TYR.2
2p0bA TOT.142 # CYS.10 GLN.9 ILE.3 SER.9 VAL.11 LYS.10 PRO.13 THR.7 PHE.3 ALA.7 HIS.11 GLY.6 ASP.9 GLU.5 LEU.8 ARG.4 TRP.1 ASN.10 TYR.1 MET.5
1g3qA TOT.237 # CYS.2 GLN.2 ASP.20 SER.10 VAL.24 GLY.20 PRO.13 LYS.17 THR.11 PHE.5 ALA.24 HIS.2 MET.7 ILE.15 GLU.17 LEU.29 ARG.8 TRP.1 ASN.6 TYR.4
3vpgA TOT.309 # GLN.8 HIS.6 SER.16 VAL.39 LYS.5 ILE.10 PRO.15 THR.12 PHE.7 ALA.46 GLY.31 ASP.11 ASN.2 LEU.37 ARG.26 TRP.2 GLU.24 TYR.9 MET.3
3u26A TOT.221 # CYS.2 ASP.15 SER.13 GLN.2 LYS.22 ASN.7 PRO.9 THR.8 PHE.12 ALA.13 HIS.3 GLY.17 ILE.12 LEU.25 ARG.10 TRP.2 VAL.15 GLU.24 TYR.10
3m8oL TOT.217 # CYS.5 GLN.14 ILE.7 SER.30 VAL.14 LYS.11 ASN.7 PRO.13 THR.17 PHE.7 ALA.11 HIS.3 GLY.15 ASP.11 LEU.19 ARG.9 TRP.2 GLU.12 TYR.8 MET.2
4o0lA TOT.266 # CYS.5 THR.14 ILE.12 SER.21 GLN.7 LYS.15 ASN.10 PRO.13 HIS.4 PHE.13 ALA.35 GLY.25 ASP.13 LEU.16 ARG.12 TRP.2 VAL.19 GLU.14 TYR.12 MET.4
3m8oH TOT.217 # CYS.7 ASP.10 SER.27 GLN.14 LYS.8 ILE.4 PRO.13 THR.18 PHE.6 ALA.16 GLY.20 HIS.3 GLU.4 LEU.18 ARG.9 TRP.4 VAL.20 ASN.7 TYR.6 MET.3
4byfA TOT.698 # CYS.10 MET.7 ILE.29 GLN.31 VAL.47 LYS.42 ASN.29 PRO.24 THR.36 PHE.38 ALA.46 HIS.18 GLY.38 ASP.29 LEU.81 ARG.56 TRP.8 GLU.61 TYR.29 SER.39
1xkpB TOT.119 # CYS.2 ASP.3 SER.11 GLN.11 MET.2 ILE.4 PRO.6 THR.7 PHE.3 ALA.12 GLY.6 HIS.4 LEU.26 ARG.5 TRP.4 VAL.5 GLU.8
3swyA TOT.46 # GLN.6 ASP.1 SER.4 VAL.2 LYS.3 ASN.1 GLY.2 THR.3 PHE.1 ALA.4 MET.2 LEU.8 ARG.3 GLU.5 TYR.1
1ukuA TOT.102 # CYS.1 ILE.10 SER.1 ASN.2 VAL.7 LYS.11 THR.5 PRO.3 HIS.2 PHE.2 ALA.6 GLY.2 ASP.8 LEU.10 ARG.6 TRP.5 GLU.16 TYR.4 MET.1
2q80A TOT.279 # CYS.3 MET.4 HIS.9 VAL.16 GLN.15 LYS.20 ASN.12 PRO.11 THR.15 PHE.13 ALA.13 GLY.15 ASP.16 ILE.15 LEU.40 ARG.12 TRP.3 GLU.19 TYR.14 SER.14
1zunB TOT.381 # CYS.2 ILE.30 GLN.11 VAL.31 LYS.19 ASN.14 PRO.14 THR.25 PHE.14 ALA.35 HIS.8 GLY.31 ASP.28 LEU.35 ARG.22 TRP.2 GLU.21 TYR.12 SER.27
2gl5A TOT.401 # CYS.7 MET.9 ASP.25 VAL.24 GLN.14 LYS.22 PRO.15 THR.19 PHE.11 ASN.18 HIS.9 GLY.36 ILE.34 LEU.34 ARG.17 TRP.5 ALA.35 GLU.29 TYR.20 SER.18
3d0fA TOT.104 # PRO.6 HIS.1 SER.4 GLN.4 LYS.10 TRP.1 THR.4 PHE.3 ALA.11 GLY.9 ILE.9 GLU.6 LEU.10 ARG.8 ASP.8 VAL.5 ASN.4 TYR.1
3bchA TOT.197 # CYS.2 GLN.7 ILE.13 SER.8 VAL.12 LYS.8 PRO.11 THR.14 PHE.7 ALA.21 HIS.4 GLY.11 ASP.9 GLU.10 LEU.19 ARG.15 TRP.4 ASN.9 TYR.7 MET.6
4extA TOT.96 # CYS.1 GLN.6 ASP.8 SER.4 VAL.11 LYS.7 PRO.2 THR.7 PHE.3 ALA.4 GLY.2 ILE.6 GLU.8 LEU.12 ARG.2 TRP.2 ASN.4 TYR.3 MET.4
3qveA TOT.129 # CYS.6 GLN.2 ASP.8 SER.12 VAL.11 LYS.9 ASN.2 PRO.8 THR.6 PHE.7 ALA.3 GLY.14 HIS.8 ILE.3 LEU.12 ARG.1 TRP.4 GLU.9 TYR.3 MET.1
2wuxA TOT.208 # CYS.2 GLN.4 ILE.12 SER.7 VAL.20 LYS.15 PRO.15 GLY.8 THR.10 PHE.13 ASN.13 HIS.2 MET.4 ASP.14 LEU.15 ARG.11 TRP.4 ALA.10 GLU.16 TYR.13
1jqkA TOT.609 # CYS.17 GLN.19 ILE.40 SER.29 VAL.50 LYS.27 PRO.28 GLY.58 THR.35 PHE.12 ALA.85 HIS.18 MET.16 ASP.36 GLU.22 LEU.59 ARG.26 TRP.3 ASN.19 TYR.10
4drrA TOT.163 # CYS.4 MET.2 ASP.6 VAL.9 GLN.10 LYS.5 PRO.7 THR.17 PHE.5 GLU.8 GLY.9 ILE.8 LEU.15 ARG.6 TRP.5 ALA.8 ASN.15 TYR.11 SER.13
1jmoA TOT.425 # CYS.3 GLN.17 ASP.27 SER.26 VAL.28 LYS.28 ILE.31 PRO.12 GLY.21 THR.28 PHE.28 GLU.23 MET.17 HIS.12 LEU.44 ARG.22 TRP.2 ALA.19 ASN.27 TYR.10
2nwdX TOT.130 # CYS.8 GLN.6 ASP.8 SER.6 VAL.9 MET.2 PRO.2 LYS.5 THR.5 PHE.2 ALA.14 HIS.1 GLY.11 ILE.5 GLU.3 LEU.8 ARG.14 TRP.5 ASN.10 TYR.6
2qy0A TOT.138 # CYS.9 ILE.8 VAL.7 GLN.15 LYS.6 TRP.2 GLY.10 THR.12 PHE.5 ALA.6 MET.3 HIS.3 GLU.4 LEU.6 ARG.8 ASP.6 PRO.11 ASN.6 TYR.10 SER.1
2qy0B TOT.228 # CYS.5 GLN.7 ASP.15 SER.10 VAL.17 LYS.6 THR.9 PRO.11 HIS.8 PHE.11 ALA.13 GLY.26 ILE.11 GLU.10 LEU.22 ARG.12 TRP.6 ASN.14 TYR.8 MET.7
1zb1A TOT.367 # CYS.6 GLN.15 ASP.23 SER.34 VAL.12 LYS.36 ILE.20 ASN.18 GLY.11 THR.18 PHE.23 ALA.22 MET.5 HIS.9 LEU.43 ARG.9 TRP.6 PRO.8 GLU.28 TYR.21
3v10A TOT.305 # MET.9 ASP.23 GLN.8 VAL.21 LYS.23 ILE.19 PRO.13 THR.29 PHE.16 GLU.22 GLY.22 HIS.6 LEU.22 ARG.4 TRP.3 ALA.14 ASN.22 TYR.9 SER.20
2hxvA TOT.327 # CYS.6 GLN.1 HIS.12 SER.20 VAL.39 LYS.17 ASN.11 PRO.18 THR.15 PHE.20 ALA.17 GLY.29 ILE.20 LEU.25 ARG.19 TRP.1 ASP.19 GLU.29 TYR.9
4l54A TOT.417 # CYS.2 ASP.28 SER.13 GLN.11 VAL.31 LYS.26 ASN.21 PRO.20 THR.29 PHE.20 ALA.24 HIS.8 GLY.32 ILE.25 LEU.30 ARG.28 TRP.8 GLU.31 TYR.17 MET.13
2hsjA TOT.209 # CYS.1 ILE.17 SER.10 GLN.15 LYS.12 PRO.6 ASP.10 THR.9 PHE.5 ASN.13 GLY.12 HIS.4 LEU.29 ARG.6 TRP.2 ALA.13 VAL.14 GLU.17 TYR.14
3odgA TOT.273 # CYS.6 MET.11 ASP.15 GLN.8 VAL.24 LYS.16 ASN.9 PRO.18 THR.14 PHE.17 ALA.21 HIS.6 GLY.26 ILE.17 LEU.26 ARG.7 GLU.12 TYR.5 SER.15
4jr9A TOT.407 # CYS.5 GLN.12 ASP.11 SER.32 VAL.28 MET.15 ASN.10 PRO.17 LYS.8 THR.22 PHE.43 ALA.49 GLY.44 ILE.29 LEU.47 ARG.14 TRP.11 GLU.4 TYR.6
1qhxA TOT.178 # CYS.3 ILE.11 SER.9 GLN.4 LYS.4 ASN.1 PRO.5 GLY.22 THR.5 PHE.5 ALA.26 MET.6 HIS.3 LEU.10 ARG.11 TYR.2 TRP.5 VAL.20 GLU.15 ASP.11
4ciiA TOT.180 # CYS.2 ILE.14 SER.13 ASN.11 GLN.11 LYS.18 PRO.2 THR.7 PHE.6 ALA.13 HIS.2 GLY.7 ASP.6 LEU.27 ARG.7 VAL.6 GLU.19 TYR.6 MET.3
3lhrA TOT.92 # CYS.1 ILE.3 SER.4 GLN.7 LYS.2 ASN.1 PRO.7 ASP.5 THR.4 PHE.4 ALA.3 GLY.4 HIS.3 LEU.12 ARG.8 TRP.2 VAL.7 GLU.14 TYR.1
2w2rA TOT.172 # CYS.1 GLN.7 ASP.11 SER.13 VAL.10 LYS.12 ILE.9 PRO.11 THR.11 PHE.14 GLU.7 GLY.11 HIS.3 LEU.17 ARG.8 TRP.3 ALA.8 ASN.7 TYR.9
4gouA TOT.499 # CYS.6 GLN.23 ILE.42 SER.40 VAL.33 LYS.44 ASN.23 PRO.16 THR.29 PHE.26 ALA.16 HIS.6 GLY.16 ASP.29 LEU.58 ARG.20 TRP.3 GLU.46 TYR.23
3tqgA TOT.350 # CYS.5 GLN.7 ILE.26 SER.17 VAL.11 LYS.21 PRO.17 THR.20 PHE.14 GLU.24 HIS.11 GLY.21 ASP.19 LEU.37 ARG.19 TRP.4 ALA.43 ASN.18 TYR.16
3kmvA TOT.136 # ASP.10 GLN.5 VAL.6 MET.2 ILE.9 PRO.7 LYS.5 THR.6 PHE.7 ASN.10 GLY.6 HIS.3 LEU.11 ARG.7 TRP.1 ALA.8 GLU.7 TYR.13 SER.13
1vgjA TOT.181 # PRO.4 GLN.2 ILE.19 SER.6 VAL.13 LYS.23 TRP.1 THR.7 PHE.10 ASN.8 GLY.11 HIS.3 LEU.16 ARG.9 ASP.8 ALA.13 GLU.24 TYR.4
4oanA TOT.304 # CYS.1 HIS.2 GLN.10 VAL.18 LYS.19 ILE.18 PRO.14 THR.18 PHE.16 ALA.34 GLY.26 ASP.18 GLU.16 LEU.26 ARG.16 TRP.8 ASN.16 TYR.9 SER.19
3neqA TOT.66 # CYS.8 GLN.2 ILE.3 SER.4 VAL.2 LYS.5 PRO.5 THR.7 PHE.3 ALA.2 GLY.3 ASP.4 GLU.2 LEU.2 ARG.5 TRP.2 ASN.4 TYR.2 MET.1
1f8yA TOT.156 # ASP.14 SER.5 VAL.10 GLN.4 LYS.13 PRO.8 THR.6 PHE.6 GLU.11 HIS.2 GLY.12 ILE.9 LEU.13 ARG.3 TRP.3 ALA.8 ASN.12 TYR.12 MET.5
4wksC TOT.545 # CYS.4 ASP.34 SER.38 VAL.35 GLN.40 LYS.14 ASN.18 PRO.38 THR.18 PHE.17 ALA.61 HIS.10 GLY.40 ILE.19 LEU.58 ARG.43 TRP.12 GLU.25 TYR.14 MET.7
4wksA TOT.162 # CYS.2 ILE.6 GLN.7 VAL.6 LYS.3 ASN.4 PRO.7 ASP.9 THR.7 PHE.6 ALA.27 GLY.17 HIS.1 LEU.19 ARG.14 TRP.4 GLU.11 TYR.7 SER.5
3pzgA TOT.357 # CYS.2 GLN.3 ILE.23 SER.19 VAL.23 GLY.35 ASN.20 PRO.14 LYS.21 THR.10 PHE.17 ALA.18 MET.9 HIS.9 LEU.23 ARG.17 TRP.13 ASP.25 GLU.31 TYR.25
1othA TOT.320 # CYS.2 GLN.14 ILE.15 SER.22 VAL.14 GLY.20 PRO.13 LYS.25 THR.24 PHE.11 ALA.24 HIS.8 MET.10 ASP.17 GLU.20 LEU.44 ARG.12 TRP.5 ASN.9 TYR.11
2a8nA TOT.130 # CYS.4 GLN.3 ASP.6 SER.6 VAL.11 MET.3 ILE.6 PRO.6 LYS.1 THR.6 PHE.4 ASN.2 GLY.11 HIS.4 LEU.10 ARG.13 ALA.19 GLU.11 TYR.4
3ig5A TOT.671 # CYS.7 GLN.18 ASP.53 SER.47 VAL.36 LYS.48 PRO.36 THR.30 PHE.39 GLU.42 HIS.19 GLY.29 ILE.35 LEU.61 ARG.34 TRP.11 ALA.41 ASN.41 TYR.30 MET.14
4l2iA TOT.338 # CYS.11 ASP.25 SER.16 VAL.25 GLN.7 LYS.26 PRO.15 THR.19 PHE.10 ALA.32 HIS.7 GLY.30 ILE.21 GLU.23 LEU.23 ARG.15 TRP.2 ASN.11 TYR.12 MET.8
1b8kA TOT.90 # CYS.6 ILE.6 GLN.4 VAL.8 LYS.6 ASN.3 TRP.4 THR.7 PHE.1 ALA.3 GLY.5 HIS.2 LEU.5 ARG.6 ASP.6 GLU.5 TYR.4 SER.9
1rwjA TOT.80 # CYS.6 ASP.5 SER.5 VAL.2 LYS.11 ASN.3 PRO.3 THR.4 PHE.6 ALA.10 GLY.8 HIS.5 LEU.2 ARG.1 GLU.2 TYR.2 MET.5
2r6aA TOT.419 # CYS.2 ILE.39 SER.29 GLN.22 MET.12 THR.19 PRO.14 LYS.17 HIS.4 PHE.11 ALA.42 GLY.23 ASP.25 ASN.16 LEU.38 ARG.30 TRP.1 VAL.30 GLU.34 TYR.11
2r6aC TOT.135 # ILE.9 SER.6 GLN.5 LYS.9 ASN.3 PRO.5 THR.2 PHE.4 ALA.16 HIS.4 GLY.5 ASP.6 LEU.20 ARG.12 TRP.1 VAL.6 GLU.18 TYR.4
1g8eA TOT.98 # CYS.1 ILE.7 ASN.3 GLN.9 GLY.2 PRO.1 LYS.3 THR.10 PHE.3 ALA.7 MET.5 HIS.5 LEU.16 ARG.4 ASP.6 VAL.4 GLU.4 TYR.2 SER.6
1zelA TOT.293 # CYS.2 MET.3 ASP.19 ASN.2 GLN.8 LYS.5 PRO.27 THR.13 PHE.4 ALA.38 HIS.4 GLY.21 ILE.10 LEU.39 ARG.29 TRP.11 VAL.24 GLU.12 TYR.5 SER.17
3obyA TOT.317 # GLN.3 ASP.15 SER.11 VAL.35 LYS.22 ILE.22 PRO.6 THR.8 PHE.16 GLU.44 GLY.26 HIS.4 LEU.32 ARG.26 TRP.4 ALA.21 ASN.9 TYR.7 MET.6
2i52A TOT.115 # CYS.1 GLN.3 ILE.9 SER.8 VAL.9 LYS.6 PRO.4 GLY.6 THR.3 PHE.6 GLU.11 MET.4 HIS.2 LEU.9 ARG.3 ASP.4 ALA.8 ASN.10 TYR.9
2y7bA TOT.128 # CYS.6 ASP.9 SER.7 GLN.5 LYS.5 PRO.4 GLY.5 THR.9 PHE.4 ASN.9 HIS.1 MET.1 ILE.7 LEU.11 ARG.14 TRP.5 ALA.5 VAL.8 GLU.11 TYR.2
4kvzA TOT.268 # CYS.4 GLN.18 ILE.25 SER.32 VAL.12 LYS.15 PRO.4 ASP.10 THR.12 PHE.16 GLU.20 GLY.14 HIS.7 LEU.23 ARG.14 TRP.2 ALA.13 ASN.14 TYR.9 MET.4
5ahoA TOT.311 # CYS.6 GLN.15 HIS.21 SER.26 VAL.21 LYS.8 ILE.19 PRO.20 THR.19 PHE.11 ALA.19 GLY.16 ASP.11 GLU.15 LEU.41 ARG.15 TRP.5 ASN.8 TYR.8 MET.7
4gniA TOT.385 # ASP.27 SER.33 GLN.10 LYS.20 ASN.17 PRO.16 THR.25 PHE.14 ALA.48 HIS.7 GLY.20 ILE.26 LEU.33 ARG.22 VAL.28 GLU.25 TYR.12 MET.2
3kjxA TOT.320 # CYS.1 GLN.7 ILE.22 SER.18 VAL.25 LYS.15 ASN.10 PRO.15 THR.13 PHE.7 ALA.34 HIS.2 GLY.30 ASP.18 LEU.36 ARG.26 TRP.1 GLU.30 TYR.10
4g6tB TOT.71 # GLN.7 ILE.4 SER.7 VAL.4 LYS.6 ASN.2 PRO.1 THR.2 PHE.2 ALA.10 HIS.1 GLY.6 ASP.3 LEU.6 ARG.5 GLU.4 TYR.1
4g6tA TOT.128 # CYS.3 GLN.4 ASP.9 SER.7 VAL.3 MET.5 ASN.5 PRO.8 LYS.5 THR.5 PHE.4 ALA.8 HIS.3 GLY.9 ILE.5 LEU.24 ARG.7 TRP.2 GLU.8 TYR.4
3erjA TOT.116 # ASP.7 SER.6 GLN.4 LYS.14 PRO.4 THR.6 ASN.1 HIS.2 GLY.10 ILE.7 LEU.19 ARG.5 TRP.1 ALA.7 VAL.14 GLU.8 TYR.1
1ry2A TOT.614 # CYS.7 GLN.14 HIS.16 SER.34 VAL.51 LYS.38 ASN.22 PRO.35 ASP.41 THR.41 PHE.26 ALA.48 GLY.47 ILE.40 LEU.50 ARG.28 TRP.11 GLU.30 TYR.29 MET.6
3bwtA TOT.333 # CYS.10 MET.3 ILE.32 GLN.18 VAL.19 LYS.24 PRO.10 THR.19 PHE.10 ALA.15 GLY.17 HIS.14 GLU.20 LEU.42 ARG.12 ASP.22 ASN.15 TYR.12 SER.19
4c1uA TOT.396 # CYS.3 ASP.32 SER.23 GLN.18 GLY.34 ASN.16 PRO.18 LYS.33 THR.23 PHE.15 ALA.49 HIS.4 MET.15 ILE.11 LEU.29 ARG.3 TRP.9 VAL.26 GLU.24 TYR.11
3s55A TOT.263 # CYS.4 GLN.3 ILE.19 SER.16 VAL.25 LYS.7 PRO.9 THR.22 PHE.9 GLU.15 HIS.6 GLY.24 ASP.15 LEU.20 ARG.10 TRP.2 ALA.39 ASN.9 TYR.4 MET.5
4le3A TOT.249 # CYS.1 ILE.11 GLN.10 VAL.15 MET.3 PRO.14 LYS.8 THR.20 PHE.8 ALA.19 HIS.7 GLY.25 ASP.14 GLU.9 LEU.14 ARG.9 TRP.12 ASN.13 TYR.12 SER.25
4npdA TOT.58 # GLN.5 ASP.4 SER.3 VAL.1 LYS.7 ASN.6 PRO.3 THR.1 PHE.3 ALA.6 HIS.1 GLY.1 ILE.3 LEU.6 ARG.1 GLU.6 TYR.1
4q2nA TOT.93 # MET.1 ILE.9 VAL.14 GLN.4 LYS.3 THR.2 PRO.1 HIS.5 PHE.2 ALA.5 GLY.12 ASP.5 GLU.3 LEU.6 ARG.5 TRP.1 ASN.6 TYR.4 SER.5
4l6xA TOT.627 # CYS.3 GLN.19 ILE.21 SER.41 VAL.27 LYS.46 PRO.33 ASP.42 THR.28 PHE.26 ALA.61 GLY.57 HIS.12 GLU.33 LEU.38 ARG.19 TRP.32 ASN.27 TYR.48 MET.14
2pbyA TOT.291 # CYS.6 ILE.21 SER.21 GLN.6 GLY.23 ASN.9 PRO.12 LYS.15 THR.11 PHE.10 ALA.24 HIS.3 MET.8 ASP.15 LEU.32 ARG.16 VAL.26 GLU.23 TYR.10
3fe4A TOT.229 # CYS.2 HIS.14 SER.14 GLN.13 MET.6 TRP.4 PRO.14 LYS.4 THR.19 PHE.7 ALA.12 GLY.15 ILE.12 ASN.15 LEU.18 ARG.10 ASP.9 VAL.18 GLU.8 TYR.15
1nwzA TOT.125 # CYS.1 MET.5 ASP.12 ASN.6 GLN.5 LYS.11 THR.7 PRO.4 HIS.2 PHE.9 ALA.9 GLY.13 ILE.5 LEU.7 ARG.2 TRP.1 VAL.9 GLU.7 TYR.5 SER.5
1vi1A TOT.294 # CYS.1 GLN.9 HIS.6 SER.17 VAL.30 LYS.14 ASN.12 PRO.10 THR.23 PHE.9 ALA.31 GLY.26 ILE.18 LEU.27 ARG.15 ASP.23 GLU.19 TYR.4
1wa5C TOT.936 # CYS.2 MET.17 ILE.93 VAL.58 GLN.40 LYS.50 PRO.41 ASP.44 THR.60 PHE.60 ALA.49 GLY.28 HIS.14 GLU.59 LEU.124 ARG.32 TRP.7 ASN.65 TYR.27 SER.66
1wa5B TOT.463 # CYS.8 GLN.29 ILE.35 SER.24 VAL.33 LYS.26 PRO.21 GLY.20 THR.25 PHE.9 ALA.42 HIS.2 MET.8 ASP.24 GLU.38 LEU.50 ARG.26 TRP.7 ASN.25 TYR.11
2o20A TOT.271 # GLN.8 ILE.18 SER.21 VAL.24 MET.9 PRO.7 LYS.18 THR.21 PHE.6 ALA.18 HIS.3 GLY.16 ASP.18 GLU.21 LEU.27 ARG.10 ASN.13 TYR.13
2o8lA TOT.216 # ASP.10 SER.9 GLN.9 VAL.18 LYS.13 PRO.12 THR.20 PHE.9 GLU.13 HIS.7 GLY.21 ILE.15 LEU.8 ARG.2 TRP.2 ALA.15 ASN.23 TYR.7 MET.3
3qk8A TOT.250 # CYS.3 GLN.5 ASP.18 SER.13 VAL.23 LYS.5 PRO.12 THR.12 PHE.9 ALA.26 HIS.6 GLY.25 ILE.12 GLU.16 LEU.30 ARG.15 TRP.4 ASN.7 TYR.5 MET.4
4aj8A TOT.105 # CYS.4 ILE.4 SER.5 GLN.7 LYS.11 ASN.6 PRO.3 GLY.4 THR.3 PHE.5 ALA.6 MET.5 ASP.10 LEU.11 TRP.1 VAL.9 GLU.8 TYR.3
3h9dA TOT.114 # CYS.2 GLN.4 ASP.10 SER.12 VAL.9 LYS.10 PRO.4 THR.5 PHE.6 ASN.2 HIS.2 GLY.4 ILE.4 LEU.9 ARG.7 ALA.6 GLU.8 TYR.7 MET.3
4n6xA TOT.91 # CYS.2 GLN.3 ILE.2 SER.3 VAL.9 LYS.5 ASN.4 PRO.5 THR.4 PHE.1 ALA.6 GLY.11 HIS.3 LEU.13 ARG.6 ASP.2 GLU.9 TYR.2 MET.1
4n1lA TOT.95 # CYS.1 HIS.1 SER.5 GLN.1 MET.3 PRO.4 LYS.12 ASP.3 THR.3 PHE.6 ASN.6 GLY.4 ILE.2 LEU.14 ARG.4 TRP.3 ALA.5 VAL.2 GLU.13 TYR.3
2vpvA TOT.94 # CYS.1 GLN.4 ILE.8 SER.7 VAL.8 LYS.9 PRO.2 THR.5 PHE.10 ALA.7 GLY.5 HIS.2 GLU.6 LEU.5 ARG.2 ASP.2 ASN.6 TYR.3 MET.2
1tu1A TOT.144 # ILE.8 SER.5 GLN.10 MET.3 ASN.3 PRO.11 LYS.5 THR.8 PHE.5 ALA.16 HIS.7 GLY.6 ASP.10 LEU.15 ARG.11 TRP.4 VAL.6 GLU.8 TYR.3
4asmB TOT.357 # CYS.2 GLN.14 ILE.21 SER.23 VAL.24 LYS.20 PRO.22 THR.21 PHE.13 ALA.23 HIS.5 GLY.27 ASP.22 GLU.11 LEU.15 ARG.15 TRP.13 ASN.42 TYR.16 MET.8
4e6uA TOT.252 # CYS.5 GLN.12 HIS.14 SER.19 VAL.21 LYS.8 TRP.2 PRO.7 THR.10 PHE.7 ALA.17 GLY.28 ILE.31 GLU.11 LEU.18 ARG.6 ASP.12 ASN.15 TYR.5 MET.4
4iiwA TOT.294 # GLN.7 ILE.20 SER.23 VAL.20 LYS.35 PRO.15 THR.23 PHE.8 ASN.18 HIS.4 GLY.10 ASP.20 LEU.23 ARG.5 ALA.22 GLU.22 TYR.19
2uuqA TOT.385 # CYS.4 GLN.12 ILE.11 SER.17 VAL.35 LYS.4 ASN.7 PRO.28 THR.31 PHE.13 ALA.37 HIS.14 GLY.31 ASP.23 LEU.37 ARG.31 TRP.6 GLU.23 TYR.10 MET.11
1oqvA TOT.171 # CYS.2 MET.3 ILE.11 GLN.6 VAL.9 LYS.11 PRO.6 THR.14 PHE.8 ALA.28 HIS.1 GLY.15 ASP.8 GLU.4 LEU.13 ARG.2 ASN.12 TYR.3 SER.15
4m0xA TOT.359 # CYS.4 GLN.8 ILE.29 SER.29 VAL.26 LYS.11 ASN.4 PRO.21 THR.20 PHE.8 ALA.42 HIS.5 GLY.34 ASP.26 LEU.31 ARG.22 TRP.7 GLU.22 TYR.4 MET.6
2oq0A TOT.184 # CYS.3 HIS.6 GLN.11 VAL.15 LYS.23 PRO.6 THR.14 PHE.10 ALA.5 GLY.8 ILE.17 GLU.15 LEU.14 ARG.5 ASP.7 ASN.10 TYR.5 SER.10
2i1sA TOT.178 # CYS.1 ILE.8 GLN.4 VAL.13 LYS.16 ASN.4 PRO.9 GLY.11 THR.8 PHE.8 ALA.8 HIS.5 MET.4 ASP.16 LEU.16 ARG.5 TRP.5 GLU.21 TYR.10 SER.6
4cbpA TOT.203 # CYS.4 ASP.8 SER.13 GLN.7 LYS.11 ASN.9 PRO.14 THR.16 PHE.3 ALA.15 HIS.8 GLY.11 ILE.15 LEU.13 ARG.16 TRP.4 VAL.17 GLU.13 TYR.6
3hdfA TOT.129 # CYS.4 MET.3 ILE.10 GLN.4 VAL.8 LYS.10 PRO.3 THR.10 PHE.2 ALA.8 HIS.2 GLY.15 ASP.6 GLU.5 LEU.11 ARG.9 TRP.4 ASN.5 TYR.7 SER.3
2xzfA TOT.258 # CYS.4 HIS.7 SER.12 GLN.13 VAL.12 LYS.23 ASN.3 PRO.10 ASP.11 THR.16 PHE.9 ALA.11 GLY.21 ILE.23 LEU.30 ARG.13 TRP.2 GLU.25 TYR.9 MET.4
3tipA TOT.132 # GLN.1 ASP.7 SER.4 VAL.8 LYS.16 PRO.17 THR.13 PHE.3 ASN.4 HIS.2 GLY.14 ILE.9 LEU.5 ARG.4 ALA.2 GLU.20 TYR.2 MET.1
1vbiA TOT.340 # GLN.4 ASP.13 SER.11 VAL.29 LYS.11 ASN.3 PRO.26 THR.9 PHE.11 ALA.50 GLY.40 HIS.8 ILE.3 LEU.43 ARG.30 TRP.8 GLU.29 TYR.6 MET.6
3trdA TOT.208 # CYS.1 ILE.11 GLN.11 VAL.25 GLY.18 TRP.4 PRO.9 LYS.10 THR.8 PHE.12 ALA.14 MET.5 HIS.7 GLU.13 LEU.18 ARG.8 ASP.9 ASN.7 TYR.5 SER.13
1zbtA TOT.291 # ASP.21 SER.12 GLN.19 LYS.18 PRO.8 THR.13 PHE.5 GLU.29 HIS.7 GLY.15 ILE.18 LEU.26 ARG.16 TRP.1 ALA.28 VAL.28 ASN.14 TYR.13
3ilvA TOT.570 # CYS.10 ASP.33 SER.31 GLN.15 LYS.33 ASN.32 PRO.17 THR.38 PHE.29 ALA.50 HIS.9 GLY.37 ILE.43 LEU.53 ARG.29 TRP.14 VAL.30 GLU.43 TYR.24
1y02A TOT.91 # CYS.9 ASP.4 GLN.6 VAL.4 LYS.8 ILE.1 PRO.3 GLY.2 THR.5 PHE.4 ALA.5 MET.4 HIS.2 GLU.6 LEU.12 ARG.7 ASN.2 TYR.1 SER.6
4lb8A TOT.261 # CYS.2 GLN.12 ILE.14 SER.25 VAL.24 LYS.20 ASN.12 PRO.4 THR.15 PHE.17 ALA.15 HIS.3 GLY.20 ASP.17 LEU.18 ARG.10 TRP.2 GLU.16 TYR.15
3rkgA TOT.258 # CYS.5 ILE.26 SER.27 GLN.9 LYS.21 PRO.7 GLY.1 THR.13 PHE.11 ASN.17 HIS.5 MET.6 ASP.20 LEU.37 ARG.8 TRP.1 ALA.9 VAL.10 GLU.17 TYR.8
1fa2A TOT.485 # CYS.6 MET.17 ASP.34 GLN.20 VAL.33 LYS.31 PRO.27 THR.18 PHE.22 ASN.27 HIS.8 GLY.42 ILE.22 LEU.39 ARG.20 TRP.12 ALA.37 GLU.28 TYR.22 SER.20
4iuwA TOT.624 # CYS.1 GLN.43 ASP.53 SER.26 VAL.38 LYS.26 ASN.30 PRO.35 THR.39 PHE.22 ALA.81 HIS.12 GLY.29 ILE.20 LEU.62 ARG.26 TRP.15 GLU.17 TYR.30 MET.19
4puxA TOT.155 # GLN.8 HIS.1 SER.9 VAL.7 LYS.13 ILE.11 PRO.8 THR.12 PHE.4 ASN.6 GLY.14 ASP.10 LEU.16 ARG.6 TRP.3 ALA.12 GLU.6 TYR.9
4oy6A TOT.186 # CYS.4 GLN.13 HIS.5 SER.13 VAL.14 LYS.2 ILE.2 PRO.9 THR.13 PHE.7 ALA.14 GLY.19 ASP.19 GLU.6 LEU.9 ARG.7 TRP.9 ASN.8 TYR.9 MET.4
4nq0A TOT.238 # CYS.2 ASP.18 SER.9 GLN.20 LYS.12 ASN.8 PRO.8 THR.9 PHE.9 ALA.24 HIS.9 GLY.7 ILE.10 LEU.32 ARG.13 TRP.1 VAL.12 GLU.22 TYR.7 MET.6
3sqnA TOT.463 # CYS.3 ILE.30 SER.40 GLN.36 LYS.19 ASN.19 PRO.12 THR.36 PHE.32 ALA.26 HIS.9 GLY.9 ASP.14 LEU.76 ARG.20 TRP.5 VAL.15 GLU.38 TYR.24
2ictA TOT.89 # GLN.4 ILE.5 SER.9 VAL.6 LYS.4 ASN.4 PRO.5 THR.5 PHE.1 ALA.11 GLY.3 HIS.1 LEU.12 ARG.7 TRP.2 ASP.3 GLU.7
2dpnA TOT.492 # CYS.2 MET.4 ASP.18 VAL.36 GLN.10 LYS.16 ILE.9 PRO.26 THR.35 PHE.18 ALA.65 GLY.56 HIS.5 ASN.8 LEU.71 ARG.38 TRP.14 GLU.41 TYR.8 SER.12
3gffA TOT.296 # GLN.19 ASP.15 SER.21 VAL.16 LYS.15 ASN.9 PRO.15 THR.15 PHE.17 ALA.18 HIS.12 GLY.23 ILE.14 LEU.40 ARG.13 TRP.1 GLU.17 TYR.16
4idlA TOT.123 # CYS.2 MET.2 ILE.3 VAL.6 GLN.8 LYS.5 ASN.5 PRO.2 THR.12 PHE.3 ALA.13 GLY.15 ASP.7 LEU.7 ARG.10 TRP.4 GLU.4 TYR.5 SER.10
1tmxA TOT.286 # PRO.20 CYS.1 GLN.9 HIS.9 SER.13 VAL.23 MET.6 ASN.4 TRP.5 LYS.3 THR.21 PHE.14 ALA.31 GLY.28 ILE.11 LEU.20 ARG.20 ASP.25 GLU.19 TYR.4
4lfyA TOT.338 # CYS.5 GLN.4 HIS.13 SER.9 VAL.20 MET.7 ILE.10 PRO.25 LYS.7 THR.29 PHE.16 ALA.46 GLY.25 ASP.22 ASN.5 LEU.39 ARG.24 TRP.3 GLU.19 TYR.10
1tjlA TOT.145 # CYS.4 MET.3 ILE.9 GLN.6 VAL.6 LYS.10 ASN.4 PRO.5 THR.6 PHE.4 ALA.13 HIS.2 GLY.6 ASP.10 LEU.12 ARG.15 TRP.1 GLU.21 TYR.3 SER.5
1v96A TOT.146 # GLN.2 ASP.11 SER.4 VAL.8 GLY.1 ASN.6 PRO.7 LYS.13 THR.12 PHE.5 ALA.10 HIS.1 MET.5 ILE.19 LEU.19 ARG.6 GLU.12 TYR.5
3fi7A TOT.177 # CYS.1 GLN.8 ILE.6 SER.19 VAL.3 LYS.15 PRO.6 THR.12 PHE.5 ALA.18 HIS.1 GLY.9 ASP.9 GLU.8 LEU.13 ARG.5 TRP.6 ASN.15 TYR.14 MET.4
2pt5A TOT.163 # CYS.2 ILE.12 SER.12 GLN.2 LYS.18 PRO.7 THR.4 PHE.10 ASN.6 GLY.12 ASP.7 LEU.19 ARG.10 ALA.5 VAL.11 GLU.22 TYR.4
3fzqA TOT.253 # CYS.7 GLN.20 ILE.30 SER.14 VAL.14 LYS.20 PRO.1 THR.10 PHE.8 GLU.20 HIS.7 GLY.16 ASP.18 LEU.21 ARG.10 TRP.1 ALA.10 ASN.15 TYR.11
3da8A TOT.205 # CYS.1 GLN.3 ASP.12 SER.8 VAL.28 MET.2 ILE.6 PRO.15 LYS.2 THR.18 PHE.5 ALA.34 GLY.18 HIS.7 ASN.1 LEU.22 ARG.13 TRP.1 GLU.6 TYR.3
3u7bA TOT.327 # CYS.4 GLN.15 ASP.17 SER.17 VAL.18 LYS.15 ILE.18 PRO.13 THR.25 PHE.6 ALA.36 GLY.26 HIS.6 GLU.14 LEU.23 ARG.19 TRP.9 ASN.24 TYR.14 MET.8
3lvkB TOT.72 # CYS.2 GLN.1 ILE.4 SER.2 VAL.4 MET.4 ASN.1 PRO.7 LYS.2 THR.7 PHE.3 ALA.4 HIS.2 GLY.4 ASP.6 LEU.8 ARG.5 GLU.4 TYR.2
3thrA TOT.286 # CYS.7 GLN.8 ASP.21 SER.18 VAL.24 LYS.17 ASN.8 PRO.13 THR.15 PHE.10 ALA.23 HIS.9 GLY.23 ILE.11 LEU.27 ARG.16 TRP.5 GLU.12 TYR.15 MET.4
2zbkA TOT.347 # GLN.10 ILE.30 SER.19 VAL.19 LYS.33 PRO.11 THR.13 PHE.17 GLU.30 HIS.3 GLY.15 ASP.24 LEU.35 ARG.23 TRP.5 ALA.26 ASN.13 TYR.14 MET.7
3cnrA TOT.89 # GLN.1 ASP.4 SER.4 VAL.7 LYS.6 ASN.1 PRO.9 THR.5 PHE.4 ALA.9 GLY.10 ILE.5 LEU.12 ARG.3 TRP.1 GLU.5 TYR.3
3ifdA TOT.65 # CYS.4 ILE.6 GLN.3 VAL.5 LYS.8 THR.4 PRO.3 HIS.1 PHE.2 ALA.5 MET.1 ASP.4 GLU.2 LEU.2 ARG.4 TRP.1 ASN.3 TYR.2 SER.5
2wkkA TOT.148 # GLN.2 ILE.12 SER.12 THR.5 LYS.7 PRO.12 HIS.4 PHE.10 GLU.8 GLY.9 ASP.5 LEU.11 ARG.7 TRP.1 ALA.12 VAL.10 ASN.14 TYR.6 MET.1
4k4oA TOT.190 # MET.1 GLN.4 ASP.16 SER.10 VAL.20 LYS.9 PRO.6 HIS.7 THR.13 GLU.18 GLY.17 ILE.15 LEU.13 ARG.13 TRP.1 ALA.10 ASN.3 TYR.8 PHE.6
4o6uA TOT.182 # GLN.7 ASP.16 SER.25 VAL.10 MET.1 PRO.7 LYS.4 THR.12 PHE.7 ALA.22 HIS.4 GLY.23 ILE.7 GLU.1 LEU.17 ARG.2 TRP.3 ASN.6 TYR.8
2hoqA TOT.232 # GLN.1 ILE.17 SER.11 VAL.16 LYS.22 ASN.9 PRO.9 THR.6 PHE.12 ALA.14 HIS.6 GLY.12 ASP.15 LEU.26 ARG.14 TRP.3 GLU.22 TYR.14 MET.3
3uizA TOT.108 # GLN.3 ILE.18 SER.9 VAL.7 MET.1 PRO.3 LYS.1 THR.7 PHE.5 ASN.8 HIS.3 GLY.12 ASP.3 LEU.8 ARG.4 TRP.1 ALA.9 GLU.1 TYR.5
2x8hA TOT.588 # CYS.13 GLN.18 HIS.14 SER.34 ASN.21 VAL.53 LYS.47 TRP.6 PRO.21 THR.43 PHE.18 ALA.44 GLY.55 ILE.34 LEU.50 ARG.17 ASP.32 GLU.36 TYR.23 MET.9
4e1bA TOT.325 # CYS.1 GLN.7 ILE.35 SER.12 VAL.31 LYS.24 ASN.18 PRO.21 THR.15 PHE.17 ALA.26 HIS.4 GLY.21 ASP.19 LEU.32 ARG.15 TRP.1 GLU.20 TYR.6
3cp7A TOT.216 # CYS.4 ASP.7 SER.18 GLN.13 MET.3 ILE.4 PRO.12 LYS.2 THR.17 PHE.14 ALA.25 GLY.30 HIS.7 GLU.8 LEU.6 ARG.3 TRP.3 VAL.11 ASN.17 TYR.12
4qclA TOT.865 # CYS.16 HIS.17 VAL.66 GLN.43 LYS.78 PRO.43 GLY.39 THR.36 PHE.35 GLU.60 MET.25 ILE.63 LEU.91 ARG.30 ASP.44 TRP.9 ALA.48 ASN.43 TYR.33 SER.46
3onrA TOT.69 # GLN.4 ILE.7 SER.7 VAL.8 LYS.4 PRO.3 GLY.2 THR.3 PHE.1 ALA.8 MET.2 ASP.6 LEU.2 ARG.5 TRP.1 GLU.4 TYR.2
4ponA TOT.168 # CYS.1 MET.3 HIS.5 GLN.8 VAL.12 LYS.13 PRO.5 THR.8 PHE.7 ASN.8 GLY.13 ILE.13 LEU.17 ARG.4 ASP.10 ALA.18 GLU.11 TYR.5 SER.7
2fliA TOT.217 # CYS.3 GLN.7 ILE.15 SER.10 VAL.21 GLY.15 ASN.7 PRO.8 LYS.11 THR.12 PHE.10 ALA.28 MET.6 HIS.6 LEU.17 ARG.7 TRP.1 ASP.15 GLU.13 TYR.5
4mcaA TOT.366 # CYS.8 GLN.18 ASP.14 SER.17 VAL.28 GLY.33 ILE.23 PRO.11 LYS.15 THR.20 PHE.10 ALA.57 MET.11 HIS.14 ASN.7 LEU.38 ARG.10 TRP.1 GLU.20 TYR.11
1tl2A TOT.235 # HIS.3 SER.12 GLN.11 LYS.17 ILE.6 PRO.12 THR.9 PHE.23 ALA.14 GLY.32 ASP.15 GLU.4 LEU.19 ARG.7 TRP.10 VAL.8 ASN.16 TYR.15 MET.2
2ibnA TOT.231 # CYS.5 HIS.11 GLN.14 VAL.17 LYS.12 ILE.4 PRO.15 THR.10 PHE.19 ALA.10 GLY.15 ASP.23 GLU.8 LEU.23 ARG.10 TRP.6 ASN.4 TYR.12 SER.13
1t4aA TOT.76 # CYS.1 ILE.3 GLN.3 VAL.11 LYS.7 PRO.1 THR.3 ASN.2 HIS.2 GLY.2 ASP.6 LEU.8 ARG.3 ALA.3 GLU.10 TYR.6 SER.5
2oibA TOT.280 # CYS.5 GLN.10 ILE.18 SER.17 VAL.19 MET.9 ASN.14 PRO.9 LYS.21 THR.15 PHE.10 ALA.17 HIS.9 GLY.16 ASP.20 LEU.26 ARG.10 TRP.1 GLU.25 TYR.9
3whrA TOT.359 # ASP.29 SER.19 GLN.17 LYS.33 PRO.20 THR.22 PHE.13 GLU.22 HIS.4 GLY.33 ILE.21 LEU.31 ARG.9 TRP.4 ALA.30 VAL.18 ASN.10 TYR.14 MET.10
3whrB TOT.183 # GLN.4 HIS.4 SER.15 VAL.15 LYS.9 TRP.1 PRO.10 THR.16 PHE.6 GLU.9 GLY.19 ILE.15 LEU.12 ARG.5 ASP.11 ALA.9 ASN.11 TYR.7 MET.5
3d9sA TOT.245 # CYS.3 ILE.17 SER.18 GLN.7 LYS.5 PRO.13 THR.12 PHE.17 ALA.34 HIS.3 GLY.23 ASP.1 GLU.5 LEU.35 ARG.7 TRP.3 VAL.22 ASN.11 TYR.6 MET.3
2otmA TOT.144 # CYS.4 ILE.7 VAL.8 GLN.8 LYS.3 ASN.6 PRO.7 ASP.3 THR.5 PHE.3 ALA.16 GLY.13 HIS.3 LEU.24 ARG.6 TRP.1 GLU.9 TYR.8 SER.10
3fcnA TOT.152 # CYS.2 GLN.6 ILE.11 ASN.2 VAL.10 LYS.2 THR.5 PRO.7 HIS.4 PHE.4 ALA.19 GLY.6 ASP.16 LEU.16 ARG.14 TRP.4 GLU.13 TYR.2 SER.9
3fjvA TOT.186 # CYS.1 ASP.18 GLN.6 VAL.10 LYS.9 ASN.3 PRO.7 THR.8 PHE.5 ALA.25 HIS.8 GLY.8 ILE.13 LEU.23 ARG.14 GLU.16 TYR.6 SER.6
3nxuA TOT.457 # CYS.7 GLN.14 ASP.24 SER.27 VAL.36 MET.17 PRO.34 LYS.35 THR.23 PHE.32 ASN.18 HIS.5 GLY.23 ILE.29 LEU.50 ARG.22 TRP.3 ALA.16 GLU.28 TYR.14
3gi7A TOT.96 # CYS.3 ILE.4 SER.8 GLN.10 LYS.3 PRO.1 THR.3 PHE.3 ALA.14 HIS.1 GLY.4 ASP.7 GLU.10 LEU.6 ARG.7 TRP.2 VAL.4 ASN.3 TYR.3
2pulA TOT.357 # CYS.3 GLN.8 ILE.27 SER.20 VAL.21 LYS.21 PRO.13 THR.25 PHE.25 ASN.11 HIS.13 GLY.20 ASP.22 LEU.39 ARG.14 TRP.4 ALA.27 GLU.31 TYR.11 MET.2
4hn1A TOT.199 # CYS.2 MET.2 ASP.13 VAL.15 GLN.10 LYS.1 PRO.14 THR.9 PHE.7 ALA.20 HIS.8 GLY.16 ILE.8 GLU.13 LEU.18 ARG.15 TRP.5 ASN.5 TYR.5 SER.13
3vglA TOT.312 # CYS.5 GLN.9 HIS.6 SER.11 VAL.29 LYS.10 ILE.19 ASN.6 THR.9 PHE.9 ALA.44 GLY.50 ASP.21 LEU.25 ARG.20 TRP.6 PRO.11 GLU.18 TYR.4
2q6tA TOT.419 # CYS.1 ASP.21 SER.26 GLN.19 MET.13 ASN.9 PRO.18 LYS.12 THR.20 PHE.8 ALA.49 HIS.8 GLY.27 ILE.29 LEU.51 ARG.34 TRP.1 VAL.23 GLU.38 TYR.12
3vnxA TOT.195 # CYS.2 ILE.6 VAL.16 GLN.11 LYS.11 THR.5 PRO.5 GLY.12 HIS.7 PHE.9 ASN.5 MET.4 ASP.11 LEU.20 ARG.7 ALA.22 GLU.23 TYR.10 SER.9
3mtkA TOT.160 # CYS.3 GLN.4 ILE.20 SER.6 VAL.7 LYS.12 THR.3 PRO.3 HIS.1 PHE.9 ALA.11 GLY.8 ASP.10 GLU.13 LEU.22 ARG.8 TRP.1 ASN.13 TYR.6
2bmmA TOT.123 # GLN.3 ASP.5 ASN.1 VAL.7 MET.6 ILE.1 PRO.9 THR.5 PHE.5 ALA.13 GLY.8 HIS.4 LEU.13 ARG.16 TRP.3 GLU.14 TYR.9 SER.1
3gzkA TOT.531 # CYS.9 GLN.13 HIS.22 SER.19 VAL.42 GLY.39 ILE.12 PRO.40 LYS.9 THR.23 PHE.19 ALA.77 MET.14 ASP.37 ASN.10 LEU.52 ARG.36 TRP.12 GLU.25 TYR.21
3bg2A TOT.397 # CYS.3 ASP.25 SER.25 GLN.18 LYS.27 PRO.9 THR.18 PHE.18 ALA.30 HIS.8 GLY.28 ILE.29 GLU.30 LEU.46 ARG.21 TRP.2 VAL.17 ASN.17 TYR.21 MET.5
1yqdA TOT.359 # CYS.8 GLN.5 ILE.22 SER.24 VAL.30 LYS.24 ASN.13 PRO.18 THR.16 PHE.15 ALA.30 GLY.38 HIS.13 LEU.30 ARG.11 TRP.2 ASP.19 GLU.21 TYR.12 MET.8
3vyyA TOT.86 # CYS.2 ASP.3 GLN.3 VAL.8 MET.4 PRO.2 LYS.8 THR.3 PHE.4 ASN.9 GLY.7 ILE.3 LEU.2 ARG.5 TRP.1 ALA.7 GLU.6 TYR.5 SER.4
1v8fA TOT.276 # GLN.9 HIS.5 SER.7 VAL.36 MET.5 ILE.3 PRO.20 LYS.4 THR.9 PHE.12 GLU.25 GLY.24 ASP.10 LEU.33 ARG.29 TRP.2 ALA.29 ASN.4 TYR.10
3mdqA TOT.288 # CYS.2 GLN.10 ILE.29 ASN.11 VAL.29 LYS.13 PRO.6 THR.19 PHE.10 ALA.19 HIS.11 GLY.23 ASP.19 LEU.30 ARG.17 TRP.2 GLU.21 TYR.4 SER.13
4a3pA TOT.205 # CYS.2 GLN.10 ASP.18 SER.11 VAL.12 LYS.16 PRO.8 THR.14 PHE.6 ALA.6 HIS.1 GLY.12 ILE.12 GLU.15 LEU.21 ARG.8 TRP.8 ASN.11 TYR.9 MET.5
3m21A TOT.62 # GLN.4 ILE.6 SER.4 VAL.8 LYS.4 ASN.6 PRO.3 GLY.6 HIS.1 PHE.1 ALA.1 MET.1 ASP.3 LEU.6 ARG.1 THR.1 GLU.5 TYR.1
3dipA TOT.369 # CYS.6 MET.6 ILE.24 GLN.7 VAL.26 LYS.7 ASN.5 PRO.22 THR.20 PHE.9 ALA.58 GLY.31 HIS.13 LEU.40 ARG.26 TRP.7 ASP.19 GLU.23 TYR.6 SER.14
3t33A TOT.407 # CYS.10 ILE.13 SER.28 GLN.8 LYS.23 ASN.13 PRO.13 THR.16 PHE.17 ALA.28 GLY.36 HIS.9 LEU.49 ARG.27 TRP.7 ASP.19 VAL.25 GLU.32 TYR.23 MET.11
3k50A TOT.359 # CYS.4 GLN.12 ASP.20 SER.21 VAL.28 LYS.14 ASN.23 PRO.22 THR.25 PHE.14 ALA.28 HIS.3 GLY.25 ILE.17 LEU.37 ARG.14 TRP.5 GLU.21 TYR.26
3di4A TOT.272 # CYS.9 ILE.8 SER.16 GLN.4 LYS.5 ASN.9 PRO.20 THR.16 PHE.11 ALA.24 HIS.14 GLY.28 ASP.20 LEU.29 ARG.17 TRP.3 VAL.16 GLU.13 TYR.10
1ic8A TOT.170 # CYS.2 HIS.5 SER.9 GLN.18 LYS.12 PRO.7 ASP.2 THR.9 PHE.4 ALA.14 GLY.6 ILE.3 GLU.18 LEU.13 ARG.14 TRP.4 VAL.13 ASN.10 TYR.5 MET.2
2yc3A TOT.219 # CYS.2 GLN.8 ILE.14 SER.18 VAL.27 LYS.16 PRO.12 THR.10 PHE.8 ASN.4 HIS.2 GLY.12 ASP.15 LEU.23 ARG.6 TRP.1 ALA.10 GLU.21 TYR.7 MET.3
3wgcA TOT.311 # CYS.4 GLN.14 ASP.20 SER.15 VAL.29 MET.10 THR.11 PRO.12 LYS.4 HIS.12 PHE.10 ALA.42 GLY.28 ILE.10 ASN.6 LEU.43 ARG.18 GLU.15 TYR.8
4rweA TOT.274 # CYS.2 ASP.20 VAL.30 GLN.12 LYS.15 ASN.16 PRO.14 THR.13 PHE.8 ALA.35 GLY.27 ILE.23 LEU.18 ARG.7 TRP.1 GLU.13 TYR.5 SER.15
1nn5A TOT.201 # CYS.3 GLN.9 ILE.6 SER.14 VAL.15 LYS.15 ASN.4 PRO.6 THR.8 PHE.8 ALA.20 HIS.5 GLY.11 ASP.12 LEU.26 ARG.14 TRP.4 GLU.16 TYR.3 MET.2
3h36A TOT.75 # GLN.5 ILE.6 SER.1 VAL.7 LYS.5 ASN.1 THR.2 ALA.11 GLY.1 HIS.4 LEU.4 ARG.5 ASP.5 GLU.15 TYR.3
2hj1A TOT.77 # ILE.12 SER.5 GLN.5 LYS.4 ASN.3 PRO.4 THR.5 PHE.4 ALA.3 GLY.4 ASP.4 LEU.7 ARG.4 VAL.3 GLU.6 TYR.4
4dirA TOT.60 # CYS.1 GLN.1 ASP.5 SER.5 VAL.2 LYS.1 ASN.2 PRO.1 THR.6 PHE.4 ALA.2 HIS.1 GLY.2 ILE.2 LEU.11 ARG.2 GLU.5 TYR.3 MET.4
3tj7A TOT.170 # CYS.2 GLN.8 ASP.4 SER.9 VAL.11 LYS.10 ASN.8 PRO.4 THR.16 PHE.10 ALA.11 HIS.9 GLY.8 ILE.12 LEU.15 ARG.4 GLU.23 TYR.6
3k1sA TOT.103 # GLN.7 ILE.8 SER.5 VAL.3 LYS.9 ASN.5 PRO.1 HIS.4 PHE.5 ALA.18 GLY.4 ASP.3 LEU.10 ARG.2 THR.5 GLU.13 TYR.1
1z6nA TOT.166 # CYS.2 GLN.9 ASP.10 SER.4 VAL.8 LYS.3 ASN.4 PRO.6 THR.2 PHE.7 ALA.25 HIS.2 GLY.13 ILE.11 LEU.24 ARG.14 TRP.1 GLU.15 TYR.4 MET.2
2gcgA TOT.324 # CYS.7 MET.5 ILE.18 GLN.10 VAL.22 LYS.15 ASN.10 PRO.18 THR.22 PHE.9 ALA.34 HIS.6 GLY.25 ASP.16 LEU.41 ARG.21 TRP.4 GLU.21 TYR.4 SER.16
3a57A TOT.154 # CYS.2 GLN.6 ILE.5 SER.17 VAL.18 LYS.10 PRO.4 THR.11 PHE.9 GLU.10 HIS.4 GLY.8 ASP.11 LEU.5 ARG.3 TRP.2 ALA.6 ASN.10 TYR.9 MET.4
4uyeA TOT.109 # CYS.1 GLN.7 HIS.1 SER.3 VAL.5 LYS.7 PRO.5 THR.5 PHE.8 GLU.9 GLY.3 ILE.5 LEU.14 ARG.8 ASP.8 ALA.7 ASN.6 TYR.5 MET.2
4okeA TOT.160 # CYS.2 GLN.6 ASP.14 SER.7 VAL.11 MET.2 PRO.13 LYS.1 THR.10 PHE.6 ALA.10 HIS.4 GLY.8 ILE.8 LEU.16 ARG.19 TRP.6 GLU.12 TYR.5
4eo0A TOT.106 # CYS.2 ASP.6 GLN.6 VAL.8 LYS.9 PRO.4 THR.11 PHE.3 ALA.7 GLY.7 ILE.6 GLU.6 LEU.4 ARG.4 TRP.3 ASN.6 TYR.3 SER.11
1jssA TOT.199 # CYS.5 MET.5 GLN.7 ILE.9 ASN.8 VAL.16 LYS.8 PRO.9 THR.12 PHE.7 ALA.9 HIS.4 GLY.12 ASP.13 LEU.18 ARG.12 TRP.6 GLU.14 TYR.9 SER.16
4x4wA TOT.398 # CYS.2 MET.8 ASP.30 ASN.14 GLN.17 LYS.35 PRO.14 THR.24 PHE.21 ALA.21 HIS.9 GLY.26 ILE.28 LEU.45 ARG.19 TRP.4 VAL.21 GLU.30 TYR.11 SER.19
1unfX TOT.213 # CYS.1 MET.3 ASP.13 VAL.14 GLN.7 LYS.18 ASN.11 PRO.12 THR.6 PHE.12 ALA.19 HIS.5 GLY.14 ILE.7 LEU.22 ARG.5 TRP.8 GLU.15 TYR.9 SER.12
3uv9A TOT.183 # CYS.6 ASP.8 SER.18 GLN.8 GLY.12 ASN.8 PRO.10 LYS.9 THR.11 PHE.11 ALA.10 HIS.4 MET.2 ILE.11 LEU.9 ARG.6 TRP.4 VAL.19 GLU.7 TYR.10
2xolA TOT.168 # CYS.1 GLN.6 ASP.8 SER.11 VAL.12 LYS.12 ILE.11 PRO.5 GLY.6 THR.2 PHE.10 GLU.17 MET.5 HIS.5 LEU.19 ARG.11 ALA.15 ASN.3 TYR.9
3df0C TOT.54 # CYS.1 ASP.7 SER.3 VAL.2 LYS.3 PRO.3 THR.4 PHE.1 ALA.4 HIS.1 GLY.3 ILE.4 LEU.9 ARG.1 GLU.5 TYR.2 MET.1
3tdnA TOT.121 # GLN.3 ILE.10 SER.7 VAL.11 LYS.7 ASN.3 PRO.3 THR.10 PHE.6 ALA.11 HIS.1 GLY.12 ASP.7 LEU.9 ARG.7 TRP.1 GLU.8 TYR.2 MET.3
4lv5B TOT.396 # CYS.4 MET.10 GLN.10 ILE.34 SER.25 VAL.23 LYS.35 PRO.17 HIS.4 THR.23 GLU.30 GLY.17 ASP.24 LEU.38 ARG.17 TRP.3 ALA.17 ASN.24 TYR.14 PHE.27
1je8A TOT.63 # ASP.3 VAL.7 GLN.3 LYS.8 PRO.2 THR.3 PHE.1 GLU.4 HIS.3 GLY.1 ILE.5 LEU.7 ARG.7 TRP.1 ALA.4 ASN.2 SER.2
3fqdA TOT.666 # CYS.7 GLN.23 ILE.40 SER.38 VAL.45 LYS.41 PRO.48 THR.23 PHE.34 ALA.38 HIS.18 GLY.31 ASP.45 GLU.57 LEU.70 ARG.41 TRP.9 ASN.32 TYR.26
1xu1R TOT.38 # CYS.6 ASP.2 SER.4 GLN.3 LYS.3 PRO.1 HIS.2 PHE.2 ALA.2 GLY.2 ILE.2 LEU.3 ARG.2 GLU.2 TYR.2
2ew8A TOT.228 # CYS.2 GLN.7 ILE.20 SER.9 VAL.16 MET.4 ASN.9 PRO.9 LYS.11 THR.15 PHE.11 ALA.30 GLY.21 HIS.2 LEU.20 ARG.12 TRP.3 ASP.14 GLU.9 TYR.4
3k7iB TOT.157 # CYS.2 GLN.3 ASP.10 SER.13 VAL.10 LYS.12 ASN.7 PRO.7 THR.7 PHE.4 ALA.12 GLY.10 HIS.6 ILE.5 LEU.12 ARG.12 TRP.3 GLU.13 TYR.7 MET.2
2zv6A TOT.350 # CYS.1 GLN.16 ILE.18 SER.25 VAL.18 LYS.35 PRO.9 THR.21 PHE.26 ALA.15 HIS.8 GLY.16 ASP.15 GLU.31 LEU.36 ARG.10 TRP.4 ASN.25 TYR.11 MET.10
2bzyA TOT.62 # CYS.1 ILE.4 GLN.3 VAL.7 LYS.6 PRO.4 THR.3 PHE.4 ASN.4 HIS.1 GLY.5 ASP.3 LEU.3 ARG.3 TRP.1 ALA.5 GLU.3 TYR.1 MET.1
1hg4A TOT.235 # CYS.8 GLN.12 ILE.17 SER.16 VAL.13 LYS.10 THR.4 PRO.13 HIS.5 PHE.10 ALA.20 GLY.8 ASP.12 ASN.6 LEU.33 ARG.18 TRP.2 GLU.17 TYR.6 MET.5
3rq4A TOT.228 # CYS.10 HIS.6 SER.10 GLN.5 GLY.17 ASN.9 PRO.11 LYS.9 THR.14 TRP.3 ALA.22 MET.3 ILE.6 LEU.25 ARG.19 ASP.10 VAL.11 GLU.18 TYR.8 PHE.12
3ugfA TOT.524 # CYS.5 MET.9 ILE.21 VAL.39 GLN.16 LYS.31 THR.38 PRO.30 HIS.8 PHE.24 ALA.37 GLY.40 ASP.30 ASN.19 LEU.44 ARG.18 TRP.19 GLU.31 TYR.26 SER.39
1y9iA TOT.158 # CYS.1 GLN.8 ASP.11 SER.8 VAL.14 LYS.8 ASN.6 PRO.3 HIS.6 PHE.3 ALA.16 GLY.12 ILE.15 LEU.19 ARG.6 TRP.1 THR.3 GLU.12 TYR.6
2v2fF TOT.362 # ASP.21 GLN.13 VAL.28 LYS.17 ILE.14 PRO.14 GLY.29 THR.31 PHE.10 ALA.33 MET.15 HIS.4 GLU.15 LEU.19 ARG.11 TRP.6 ASN.25 TYR.33 SER.24
2y8yA TOT.201 # MET.2 ILE.1 VAL.17 GLN.7 LYS.9 ASN.3 PRO.17 THR.9 PHE.6 ALA.21 HIS.2 GLY.16 ASP.5 LEU.33 ARG.24 TRP.5 GLU.17 TYR.2 SER.5
1qd9A TOT.124 # CYS.1 ILE.8 SER.7 VAL.15 GLN.6 LYS.8 PRO.6 ARG.2 HIS.4 THR.7 ASN.5 GLY.7 ASP.4 LEU.6 PHE.6 ALA.14 GLU.11 TYR.4 MET.3
3w9sA TOT.113 # CYS.1 GLN.3 HIS.3 SER.7 VAL.6 LYS.3 PRO.3 THR.5 PHE.2 ALA.11 GLY.7 ILE.7 GLU.7 LEU.23 ARG.7 ASP.10 ASN.2 TYR.3 MET.3
4uxaA TOT.131 # CYS.1 ASP.7 GLN.5 VAL.9 GLY.15 ILE.5 PRO.9 LYS.4 THR.12 PHE.4 ALA.15 MET.3 HIS.9 LEU.6 ARG.7 TRP.6 GLU.9 TYR.1 SER.4
1fhgA TOT.101 # CYS.5 GLN.1 ILE.3 SER.5 VAL.9 LYS.7 ASN.3 PRO.5 THR.7 PHE.4 ALA.7 HIS.2 GLY.5 ASP.10 LEU.5 ARG.2 TRP.1 GLU.13 TYR.4 MET.3
3f0dA TOT.155 # CYS.1 MET.2 ILE.12 GLN.5 VAL.10 LYS.5 ASN.4 PRO.6 HIS.5 PHE.5 THR.4 GLY.16 ASP.13 LEU.17 ARG.12 ALA.24 GLU.6 TYR.3 SER.5
4v03A TOT.236 # GLN.2 ILE.28 SER.11 VAL.23 GLY.17 PRO.10 LYS.21 THR.8 PHE.3 ALA.16 MET.5 ASP.18 GLU.18 LEU.25 ARG.13 TRP.3 ASN.10 TYR.5
4jeaA TOT.106 # CYS.4 ASP.10 SER.3 GLN.5 LYS.10 ASN.6 PRO.4 THR.4 PHE.2 ALA.19 GLY.3 HIS.5 ILE.4 LEU.9 ARG.2 TRP.2 VAL.3 GLU.7 TYR.1 MET.3
4jbsA TOT.858 # CYS.7 ASP.45 GLN.36 VAL.43 GLY.39 PRO.31 LYS.61 THR.53 PHE.40 ASN.35 HIS.26 MET.20 ILE.49 LEU.112 ARG.31 TRP.20 ALA.49 GLU.56 TYR.38 SER.67
4mhxA TOT.454 # CYS.4 HIS.20 GLN.23 VAL.28 LYS.7 TRP.10 PRO.38 GLY.32 THR.30 PHE.25 ALA.31 MET.7 ILE.13 GLU.14 LEU.56 ARG.24 ASP.23 ASN.18 TYR.20 SER.31
3zojA TOT.263 # CYS.2 HIS.4 SER.12 GLN.7 LYS.4 PRO.16 GLY.28 THR.14 PHE.20 ALA.41 MET.8 ILE.21 GLU.7 LEU.23 ARG.10 ASP.3 TRP.8 VAL.14 ASN.11 TYR.10
1x1nA TOT.523 # CYS.2 ILE.37 SER.35 GLN.20 LYS.27 ASN.22 PRO.34 GLY.39 THR.16 PHE.24 ALA.38 HIS.9 MET.7 ASP.41 LEU.51 ARG.28 TRP.18 VAL.27 GLU.34 TYR.14
1kyqA TOT.256 # CYS.8 GLN.11 HIS.6 SER.10 VAL.11 LYS.19 ILE.19 PRO.12 THR.8 PHE.13 ALA.10 GLY.15 ASP.22 ASN.11 LEU.35 ARG.19 TRP.3 GLU.15 TYR.9
1vkiA TOT.162 # ILE.6 SER.12 GLN.5 LYS.9 ASN.6 PRO.6 THR.15 PHE.9 ALA.10 GLY.11 HIS.6 LEU.19 ARG.6 ASP.10 VAL.18 GLU.11 TYR.2 MET.1
4tzmA TOT.239 # CYS.3 GLN.8 ILE.14 SER.21 VAL.16 LYS.13 PRO.8 GLY.10 THR.12 PHE.16 ALA.18 HIS.7 MET.6 ASP.16 GLU.15 LEU.20 ARG.13 TRP.2 ASN.13 TYR.8
2cy5A TOT.126 # CYS.3 GLN.9 HIS.4 SER.9 VAL.14 LYS.2 ASN.2 PRO.6 THR.3 PHE.3 ALA.9 GLY.7 ILE.3 LEU.18 ARG.10 TRP.1 ASP.9 GLU.11 TYR.3
2qt3A TOT.401 # CYS.6 MET.7 ASP.34 VAL.34 GLN.8 LYS.31 ASN.14 PRO.11 THR.21 PHE.13 ALA.29 HIS.11 GLY.29 ILE.35 LEU.33 ARG.17 TRP.6 GLU.28 TYR.12 SER.22
2pq8A TOT.240 # CYS.8 ILE.16 SER.20 GLN.10 LYS.15 PRO.15 GLY.12 THR.9 PHE.10 ALA.7 HIS.8 MET.3 ASP.13 GLU.12 LEU.27 ARG.5 TRP.6 VAL.16 ASN.8 TYR.20
4g4xA TOT.107 # GLN.6 ILE.2 SER.7 VAL.8 MET.2 PRO.3 LYS.5 THR.6 PHE.2 GLU.9 HIS.4 GLY.6 ASP.6 LEU.7 ARG.7 TRP.1 ALA.12 ASN.8 TYR.6
1hlvA TOT.131 # CYS.1 ILE.11 SER.8 GLN.4 LYS.12 PRO.6 THR.6 PHE.5 GLU.10 GLY.8 ASP.5 LEU.14 ARG.17 TRP.2 ALA.10 VAL.3 ASN.5 TYR.2 MET.2
1ebdA TOT.453 # CYS.4 GLN.12 ASP.19 SER.17 VAL.44 LYS.31 PRO.15 THR.26 PHE.13 ALA.59 HIS.6 GLY.50 ILE.39 GLU.37 LEU.32 ARG.13 TRP.1 ASN.18 TYR.11 MET.6
3k4iA TOT.198 # CYS.6 ILE.17 SER.16 GLN.13 LYS.3 PRO.9 THR.12 PHE.5 ALA.16 HIS.3 GLY.18 ASP.14 GLU.8 LEU.14 ARG.11 TRP.1 VAL.22 ASN.6 TYR.4
1wlzA TOT.82 # CYS.1 ILE.5 SER.3 GLN.3 LYS.2 PRO.2 GLY.1 THR.7 PHE.6 GLU.6 HIS.4 MET.3 ASP.6 LEU.6 ARG.9 TRP.1 ALA.7 VAL.3 ASN.5 TYR.2
4fsoA TOT.333 # CYS.2 GLN.17 ASP.25 SER.20 VAL.14 LYS.5 ASN.15 PRO.7 THR.14 PHE.16 ALA.36 HIS.4 GLY.34 ILE.9 LEU.43 ARG.26 TRP.4 GLU.14 TYR.21 MET.7
2v90A TOT.95 # CYS.2 GLN.5 ASP.5 SER.5 VAL.9 LYS.5 ILE.1 PRO.6 THR.3 PHE.3 ALA.6 GLY.14 HIS.2 LEU.10 ARG.6 TRP.1 GLU.10 MET.2
4tt0A TOT.129 # ASP.6 SER.4 GLN.10 LYS.5 ASN.1 PRO.3 THR.10 PHE.2 ALA.23 HIS.2 GLY.7 ILE.2 LEU.17 ARG.13 TRP.1 VAL.10 GLU.13
3mqhA TOT.190 # CYS.7 ILE.13 GLN.5 VAL.23 MET.3 PRO.7 LYS.3 ASP.9 THR.10 PHE.6 ALA.18 GLY.22 HIS.6 GLU.9 LEU.9 ARG.15 TRP.3 ASN.11 TYR.5 SER.6
3h7oA TOT.219 # CYS.4 MET.2 ASP.18 GLN.10 VAL.21 LYS.15 ILE.11 PRO.15 THR.15 PHE.8 ALA.12 GLY.18 HIS.3 ASN.2 LEU.19 ARG.6 TRP.4 GLU.11 TYR.9 SER.16
3vbcA TOT.136 # CYS.5 ASP.7 SER.7 VAL.11 GLN.9 LYS.7 ASN.3 PRO.6 THR.8 PHE.9 ALA.13 HIS.6 GLY.4 ILE.4 LEU.20 ARG.2 TRP.2 GLU.5 TYR.6 MET.2
1nijA TOT.317 # CYS.5 ILE.24 GLN.14 VAL.22 MET.6 THR.17 PRO.10 LYS.12 HIS.8 PHE.13 GLU.23 GLY.22 ASP.25 LEU.39 ARG.17 TRP.3 ALA.22 ASN.15 TYR.7 SER.13
4jl5A TOT.203 # ILE.16 SER.3 GLN.6 LYS.22 PRO.15 THR.6 PHE.6 ALA.10 HIS.4 GLY.17 ASP.10 GLU.23 LEU.18 ARG.12 VAL.22 ASN.3 TYR.7 MET.3
3f3bA TOT.114 # CYS.2 ASP.9 GLN.8 VAL.8 LYS.5 ASN.2 PRO.9 THR.4 PHE.4 ALA.7 HIS.8 GLY.2 ILE.10 LEU.8 ARG.8 TRP.2 GLU.8 TYR.5 SER.5
1ppjF TOT.98 # ILE.6 SER.2 GLN.3 LYS.11 PRO.3 GLY.3 THR.2 PHE.2 ASN.4 HIS.1 MET.2 ASP.8 LEU.10 ARG.11 TRP.3 ALA.5 VAL.3 GLU.13 TYR.6
1ppjG TOT.73 # CYS.1 GLN.3 ILE.3 SER.4 VAL.6 LYS.4 PRO.6 THR.5 PHE.7 ALA.4 GLY.3 HIS.3 GLU.3 LEU.5 ARG.9 TRP.1 ASN.2 TYR.4
1ppjD TOT.241 # CYS.5 GLN.5 ASP.13 SER.16 VAL.15 LYS.12 ASN.6 PRO.22 THR.7 PHE.8 ALA.18 GLY.17 HIS.9 ILE.4 LEU.25 ARG.15 TRP.3 GLU.16 TYR.15 MET.10
1ppjB TOT.422 # CYS.2 ASP.17 SER.38 GLN.19 LYS.19 ASN.23 PRO.17 HIS.12 PHE.15 ALA.57 GLY.33 ILE.19 LEU.42 ARG.17 TRP.1 THR.18 VAL.33 GLU.21 TYR.14 MET.5
1ppjC TOT.364 # CYS.4 GLN.6 ILE.35 SER.21 VAL.17 LYS.8 PRO.21 THR.26 PHE.23 ALA.27 HIS.11 GLY.25 ASP.11 GLU.6 LEU.59 ARG.7 TRP.12 ASN.16 TYR.16 MET.13
1ppjA TOT.439 # CYS.12 ASP.24 SER.33 GLN.22 LYS.14 ASN.17 PRO.18 THR.23 PHE.13 ALA.44 HIS.15 GLY.32 ILE.17 LEU.44 ARG.24 TRP.4 VAL.30 GLU.29 TYR.16 MET.8
1ppjJ TOT.32 # ASP.2 ASN.1 GLN.1 LYS.5 HIS.3 PHE.3 ALA.3 GLY.2 ILE.3 LEU.1 ARG.1 TRP.1 GLU.4 TYR.2
1ppjH TOT.66 # CYS.5 ASP.5 GLN.3 VAL.5 LYS.4 ASN.1 PRO.1 THR.4 PHE.2 ALA.3 HIS.3 LEU.10 ARG.6 GLU.10 SER.4
1ppjI TOT.36 # CYS.1 GLN.1 SER.6 VAL.7 PRO.3 THR.1 ALA.7 GLY.2 GLU.1 LEU.3 ARG.3 ASN.1
3hc7A TOT.246 # ILE.18 SER.8 GLN.10 GLY.23 PRO.18 LYS.9 ASP.18 THR.7 PHE.11 ALA.25 MET.6 HIS.10 GLU.11 LEU.24 ARG.14 TRP.6 VAL.15 ASN.4 TYR.9
4f0aB TOT.289 # CYS.22 ASP.13 SER.24 GLN.12 MET.4 ILE.14 PRO.3 LYS.14 THR.16 PHE.10 GLU.21 GLY.27 HIS.8 LEU.24 ARG.18 TRP.7 ALA.21 VAL.12 ASN.14 TYR.5
4fixA TOT.629 # CYS.7 MET.15 GLN.24 HIS.23 SER.30 VAL.45 LYS.21 ASN.19 PRO.42 THR.36 TRP.16 ALA.68 GLY.36 ILE.28 LEU.61 ARG.48 ASP.41 GLU.30 TYR.18 PHE.21
2i0fA TOT.147 # CYS.1 MET.1 ASP.14 GLN.1 VAL.10 LYS.5 ASN.4 PRO.3 THR.9 PHE.6 ALA.23 GLY.15 HIS.3 ILE.9 LEU.14 ARG.7 TRP.1 GLU.12 TYR.4 SER.5
1t61A TOT.223 # CYS.12 ASP.4 VAL.9 GLN.9 MET.9 ILE.10 PRO.16 LYS.5 THR.16 PHE.11 ALA.17 GLY.17 HIS.7 ASN.9 LEU.14 ARG.12 TRP.4 GLU.11 TYR.9 SER.22
2qzqA TOT.148 # CYS.2 ASP.9 ASN.4 GLN.4 LYS.19 PRO.12 THR.12 PHE.8 ALA.5 HIS.5 GLY.7 ILE.11 LEU.19 ARG.5 VAL.7 GLU.9 TYR.5 SER.5
1kzqA TOT.253 # CYS.12 GLN.8 ILE.10 SER.23 VAL.21 GLY.18 ASN.10 PRO.18 LYS.20 THR.32 PHE.6 ALA.21 HIS.3 MET.2 ASP.11 LEU.17 ARG.3 TRP.3 GLU.12 TYR.3
1kcgC TOT.170 # CYS.5 GLN.10 ASP.12 SER.12 VAL.8 LYS.12 ILE.3 PRO.2 GLY.10 THR.7 PHE.9 ALA.7 MET.7 HIS.6 GLU.12 LEU.19 ARG.14 TRP.7 ASN.4 TYR.4
4kwhA TOT.251 # MET.7 GLN.5 ASP.13 ASN.7 VAL.23 LYS.7 PRO.9 THR.16 PHE.10 ALA.37 HIS.3 GLY.30 ILE.13 LEU.21 ARG.14 TRP.1 GLU.16 TYR.3 SER.16
1wd3A TOT.482 # CYS.8 ASP.34 SER.47 GLN.13 LYS.8 ASN.29 PRO.18 THR.51 PHE.19 ALA.48 HIS.8 GLY.57 ILE.18 LEU.23 ARG.12 TRP.5 VAL.25 GLU.22 TYR.29 MET.8
1i5pA TOT.633 # CYS.4 GLN.29 ASP.24 SER.60 VAL.37 LYS.9 ILE.39 PRO.26 THR.57 PHE.33 ALA.30 GLY.42 HIS.11 ASN.68 LEU.63 ARG.36 TRP.8 GLU.19 TYR.27 MET.11
3thiA TOT.362 # CYS.1 GLN.24 ASP.28 SER.22 VAL.25 LYS.18 PRO.27 THR.11 PHE.13 ASN.11 HIS.4 GLY.24 ILE.18 LEU.39 ARG.15 TRP.4 ALA.31 GLU.18 TYR.21 MET.8
4fyyB TOT.147 # CYS.4 GLN.6 HIS.3 SER.11 VAL.12 LYS.10 PRO.7 THR.6 PHE.5 GLU.10 GLY.6 ILE.12 LEU.15 ARG.8 ASP.8 ALA.10 ASN.10 TYR.3 MET.1
3zxcA TOT.71 # CYS.12 ILE.3 GLN.1 VAL.6 LYS.2 PRO.9 THR.4 PHE.4 ALA.3 GLY.11 ASP.6 LEU.2 ARG.1 GLU.4 TYR.3
3hhdA TOT.851 # CYS.15 GLN.34 ASP.37 SER.63 VAL.58 MET.19 PRO.63 LYS.29 THR.36 PHE.34 GLU.50 HIS.24 GLY.79 ILE.38 LEU.97 ARG.46 TRP.13 ALA.76 ASN.27 TYR.13
3renA TOT.324 # CYS.1 GLN.5 ASP.21 SER.29 VAL.14 LYS.33 ILE.26 PRO.5 THR.13 PHE.14 ASN.28 GLY.20 HIS.4 LEU.33 ARG.7 TRP.4 ALA.15 GLU.30 TYR.22
2yw8A TOT.61 # CYS.8 HIS.5 SER.6 GLN.2 LYS.4 ILE.2 PRO.3 THR.3 PHE.2 GLU.4 GLY.1 ASP.3 LEU.5 ARG.5 ALA.2 VAL.2 ASN.3 TYR.1
2isnA TOT.324 # CYS.3 GLN.9 ILE.17 SER.20 VAL.37 LYS.19 TRP.2 PRO.19 THR.17 PHE.10 ALA.34 GLY.20 HIS.9 GLU.25 LEU.25 ARG.18 ASP.21 ASN.10 TYR.9
3wr2A TOT.100 # CYS.6 GLN.2 ILE.2 SER.11 VAL.7 PRO.5 THR.9 PHE.11 GLU.3 HIS.2 GLY.14 ASP.3 LEU.1 ARG.7 ALA.7 ASN.6 TYR.4
1jggA TOT.57 # CYS.1 GLN.4 ILE.1 SER.2 VAL.2 LYS.5 PRO.2 GLY.1 THR.3 PHE.3 ASN.3 MET.1 ASP.2 LEU.5 ARG.10 TRP.1 ALA.3 GLU.5 TYR.3
2wltA TOT.323 # ILE.18 SER.29 GLN.14 LYS.21 ASN.15 PRO.8 GLY.29 THR.22 PHE.9 ALA.29 MET.8 HIS.7 LEU.33 ARG.10 TRP.1 ASP.13 VAL.30 GLU.17 TYR.10
1f0xA TOT.502 # CYS.6 GLN.17 ASP.37 SER.23 VAL.32 LYS.29 PRO.21 GLY.39 THR.21 PHE.17 GLU.34 HIS.21 MET.8 ILE.24 LEU.53 ARG.30 TRP.5 ALA.42 ASN.21 TYR.22
3h6gA TOT.377 # CYS.4 GLN.14 ASP.22 SER.29 VAL.23 LYS.22 PRO.13 GLY.22 THR.28 PHE.21 ASN.16 HIS.10 MET.13 ILE.20 LEU.38 ARG.18 TRP.6 ALA.25 GLU.20 TYR.13
3uieA TOT.191 # CYS.8 ASP.15 VAL.13 GLN.5 GLY.19 PRO.8 LYS.13 THR.5 PHE.5 ALA.14 HIS.1 MET.3 ILE.11 GLU.12 LEU.21 ARG.13 TRP.1 ASN.6 TYR.7 SER.11
4j1vA TOT.166 # CYS.3 ASP.9 GLN.9 VAL.10 GLY.5 ASN.7 PRO.9 LYS.8 THR.8 PHE.13 ALA.10 HIS.6 MET.6 ILE.11 LEU.16 ARG.6 TRP.3 GLU.13 TYR.7 SER.7
1otgA TOT.125 # CYS.1 GLN.5 HIS.7 SER.6 VAL.6 LYS.5 ILE.7 PRO.5 GLY.7 THR.6 PHE.9 ALA.13 MET.4 ASP.5 GLU.10 LEU.15 ARG.6 TRP.2 ASN.5 TYR.1
3iixA TOT.328 # CYS.6 GLN.5 ASP.20 SER.9 VAL.21 LYS.17 ASN.13 PRO.20 THR.21 PHE.12 ALA.18 HIS.5 GLY.26 ILE.22 LEU.38 ARG.25 TRP.4 GLU.25 TYR.11 MET.10
1cb8A TOT.661 # CYS.2 GLN.30 ASP.41 SER.37 VAL.35 LYS.49 PRO.28 THR.35 PHE.23 ALA.52 HIS.17 GLY.46 ILE.39 GLU.36 LEU.62 ARG.27 TRP.16 ASN.35 TYR.39 MET.12
4icsA TOT.413 # CYS.2 GLN.11 ASP.28 SER.22 VAL.31 GLY.27 ILE.20 PRO.18 LYS.24 THR.18 PHE.16 ALA.51 MET.12 HIS.9 GLU.33 LEU.35 ARG.14 TRP.7 ASN.26 TYR.9
1zd0A TOT.130 # CYS.3 ASP.6 GLN.4 VAL.10 LYS.10 PRO.1 THR.6 PHE.5 ASN.5 HIS.3 GLY.9 ILE.15 LEU.12 ARG.4 TRP.1 ALA.13 GLU.14 TYR.3 SER.6
1fpzA TOT.176 # CYS.11 ILE.14 SER.13 GLN.8 MET.1 ASN.5 PRO.6 LYS.9 THR.10 PHE.5 ALA.9 HIS.7 GLY.12 ASP.10 LEU.24 ARG.10 TRP.1 VAL.6 GLU.8 TYR.7
1oj8A TOT.104 # CYS.8 ILE.4 GLN.3 VAL.6 LYS.15 PRO.6 GLY.3 THR.9 PHE.6 ALA.4 HIS.3 MET.2 ASP.7 GLU.2 LEU.9 ARG.5 TRP.1 ASN.7 TYR.2 SER.2
2w8dA TOT.407 # GLN.13 ASP.40 SER.30 VAL.24 LYS.41 ILE.20 PRO.16 THR.20 PHE.29 ASN.27 GLY.27 HIS.12 LEU.28 ARG.5 TRP.1 ALA.19 GLU.28 TYR.27
1nf2A TOT.267 # CYS.2 GLN.1 HIS.2 SER.15 VAL.26 GLY.9 ILE.18 PRO.9 LYS.24 THR.11 PHE.12 ALA.11 MET.6 ASP.19 GLU.29 LEU.27 ARG.15 TRP.2 ASN.17 TYR.12
2aa4A TOT.289 # CYS.6 GLN.15 ASP.16 SER.10 VAL.16 GLY.36 PRO.11 LYS.5 THR.21 PHE.5 ALA.49 HIS.10 MET.2 ILE.18 GLU.11 LEU.37 ARG.13 TRP.1 ASN.4 TYR.3
3dt5A TOT.118 # CYS.1 GLN.2 ILE.9 SER.5 VAL.4 LYS.11 PRO.4 THR.7 PHE.7 ALA.9 HIS.1 GLY.4 ASP.6 GLU.14 LEU.14 ARG.5 TRP.4 ASN.3 TYR.8
3sg0A TOT.352 # GLN.7 ILE.24 SER.18 VAL.22 LYS.30 ASN.9 PRO.20 THR.19 PHE.14 ALA.58 HIS.4 GLY.31 ASP.21 LEU.26 ARG.13 TRP.2 GLU.23 TYR.11
1a4sA TOT.503 # CYS.14 GLN.18 ASP.20 SER.26 VAL.51 GLY.46 PRO.27 LYS.26 THR.32 PHE.19 GLU.34 HIS.6 MET.16 ILE.23 LEU.39 ARG.23 TRP.5 ALA.47 ASN.18 TYR.13
4ldgA TOT.200 # CYS.7 GLN.2 ILE.25 SER.13 VAL.6 LYS.17 ASN.14 PRO.6 THR.7 PHE.9 ALA.8 HIS.3 GLY.10 ASP.10 LEU.18 ARG.9 TRP.1 GLU.16 TYR.16 MET.3
4c9gA TOT.253 # CYS.4 MET.8 ASP.13 GLN.8 VAL.20 LYS.12 ASN.7 PRO.4 THR.13 PHE.15 ALA.30 GLY.30 ILE.12 LEU.25 ARG.15 TRP.3 GLU.6 TYR.13 SER.15
1xkzA TOT.191 # GLN.7 ILE.13 SER.18 VAL.6 LYS.13 PRO.5 GLY.14 THR.8 PHE.9 GLU.6 HIS.5 MET.9 ASP.7 LEU.15 ARG.4 TRP.5 ALA.7 ASN.19 TYR.21
4d6kA TOT.76 # CYS.2 ILE.5 SER.4 GLN.6 LYS.5 ASN.4 PRO.3 GLY.2 THR.1 PHE.4 ALA.7 MET.2 ASP.5 LEU.9 ARG.3 VAL.5 GLU.8 TYR.1
4dexB TOT.42 # ILE.2 VAL.2 GLN.3 LYS.2 GLY.1 PHE.2 ASN.3 MET.1 ASP.1 LEU.5 ARG.6 TRP.1 ALA.4 GLU.8 TYR.1
3isaA TOT.240 # CYS.3 GLN.8 ASP.19 SER.11 VAL.11 LYS.4 ASN.3 PRO.10 THR.10 PHE.13 ALA.45 HIS.4 GLY.17 ILE.8 LEU.29 ARG.25 TRP.3 GLU.11 TYR.3 MET.3
2q6kA TOT.257 # CYS.5 GLN.6 ILE.15 SER.13 VAL.27 MET.3 ASN.10 PRO.19 LYS.7 THR.15 PHE.9 ALA.29 HIS.9 GLY.19 ASP.15 LEU.25 ARG.10 TRP.3 GLU.12 TYR.6
3kh5A TOT.278 # GLN.3 ILE.32 SER.6 VAL.29 LYS.21 PRO.7 THR.20 PHE.7 ASN.21 HIS.2 GLY.16 ASP.19 LEU.19 ARG.20 TRP.1 ALA.16 GLU.23 TYR.5 MET.11
3d33A TOT.89 # CYS.1 GLN.1 ASP.9 SER.4 VAL.6 LYS.4 ILE.8 PRO.6 THR.10 PHE.3 ALA.5 GLY.7 HIS.1 ASN.3 LEU.6 ARG.3 TRP.1 GLU.6 TYR.5
2z86A TOT.580 # CYS.17 HIS.11 SER.36 GLN.14 MET.7 ASN.37 PRO.22 LYS.43 THR.25 PHE.22 ALA.35 GLY.24 ILE.46 LEU.55 ARG.33 TRP.10 ASP.35 VAL.31 GLU.44 TYR.33
4c24A TOT.203 # CYS.3 GLN.4 ILE.14 SER.9 VAL.17 MET.8 ASN.9 PRO.6 LYS.12 THR.10 PHE.6 ALA.23 HIS.6 GLY.14 ASP.10 LEU.19 ARG.7 TRP.1 GLU.16 TYR.9
2pjzA TOT.260 # GLN.4 ILE.24 SER.17 VAL.19 LYS.18 ASN.15 PRO.6 THR.7 PHE.6 ALA.11 HIS.2 GLY.25 ASP.10 LEU.39 ARG.15 GLU.23 TYR.14 MET.5
1qgvA TOT.125 # CYS.2 GLN.3 ILE.10 SER.4 VAL.14 LYS.8 THR.4 PRO.5 GLY.6 HIS.4 PHE.6 ALA.5 MET.8 ASP.11 ASN.5 LEU.8 ARG.6 TRP.3 GLU.8 TYR.5
3gmeD TOT.20 # HIS.3 SER.1 PRO.3 THR.2 ALA.7 GLY.3 ARG.1
4x2zA TOT.300 # CYS.10 HIS.3 SER.15 GLN.12 LYS.22 ILE.14 PRO.8 THR.22 PHE.16 ALA.30 GLY.19 ASP.22 GLU.13 LEU.28 ARG.9 TRP.6 VAL.19 ASN.15 TYR.17
1m1jA TOT.192 # CYS.6 MET.4 ILE.16 GLN.17 VAL.12 LYS.15 PRO.6 THR.12 PHE.2 ALA.7 HIS.3 GLY.8 ASP.17 GLU.10 LEU.12 ARG.13 TRP.2 ASN.11 TYR.6 SER.13
3gpgA TOT.162 # CYS.4 HIS.4 SER.12 GLN.2 LYS.12 PRO.8 GLY.11 THR.10 PHE.3 ALA.16 MET.4 ILE.6 GLU.11 LEU.8 ARG.9 ASP.9 TRP.2 VAL.16 ASN.8 TYR.7
4kctA TOT.498 # CYS.15 GLN.17 ASP.26 SER.34 VAL.53 MET.14 PRO.20 LYS.33 THR.27 PHE.12 ALA.43 HIS.13 GLY.33 ILE.33 GLU.31 LEU.31 ARG.27 ASN.24 TYR.12
2vxgA TOT.130 # CYS.1 HIS.4 GLN.11 VAL.4 LYS.8 ILE.9 PRO.3 GLY.4 THR.6 PHE.5 ALA.13 MET.5 ASP.5 GLU.6 LEU.19 ARG.6 ASN.11 TYR.3 SER.7
2yvtA TOT.256 # GLN.3 ILE.19 SER.3 VAL.24 LYS.21 TRP.2 PRO.15 THR.10 PHE.17 ALA.14 GLY.19 HIS.10 GLU.31 LEU.24 ARG.15 ASP.8 ASN.12 TYR.9
2a5lA TOT.167 # CYS.2 GLN.4 ILE.3 SER.14 VAL.8 LYS.6 ASN.2 PRO.8 ASP.4 THR.14 PHE.5 ALA.20 GLY.20 HIS.6 LEU.26 ARG.9 TRP.1 GLU.8 TYR.7
4bgfA TOT.263 # CYS.2 GLN.9 ASP.22 SER.9 VAL.24 LYS.5 ILE.8 PRO.16 THR.25 PHE.10 ALA.25 GLY.23 HIS.6 GLU.9 LEU.32 ARG.18 TRP.4 ASN.5 TYR.9 MET.2
3ib6A TOT.173 # CYS.1 MET.3 ILE.14 VAL.14 GLN.6 LYS.9 PRO.11 THR.14 PHE.8 ASN.10 HIS.4 GLY.7 ASP.13 LEU.20 ARG.4 TRP.3 ALA.12 GLU.11 TYR.3 SER.6
1sfpA TOT.111 # CYS.4 GLN.5 ILE.9 SER.9 VAL.7 LYS.5 ASN.5 PRO.9 GLY.9 THR.5 TRP.1 ALA.3 MET.3 HIS.2 LEU.9 ARG.4 ASP.3 GLU.9 TYR.8 PHE.2
3abhA TOT.278 # CYS.5 HIS.9 ASN.10 GLN.19 LYS.35 ILE.7 PRO.7 THR.6 PHE.12 ALA.27 GLY.11 ASP.15 LEU.23 ARG.17 TRP.8 VAL.13 GLU.36 TYR.7 SER.11
4rctA TOT.338 # CYS.3 GLN.14 HIS.15 SER.26 VAL.19 LYS.28 ILE.20 PRO.9 THR.18 PHE.19 GLU.24 GLY.21 ASP.18 LEU.33 ARG.12 TRP.6 ALA.13 ASN.23 TYR.11 MET.6
4dovA TOT.149 # CYS.3 GLN.11 ILE.12 SER.7 VAL.15 LYS.11 PRO.13 ARG.7 THR.3 PHE.9 ASN.6 GLY.7 HIS.2 LEU.11 TRP.5 ASP.5 ALA.7 GLU.12 TYR.3
1b6aA TOT.355 # CYS.15 GLN.9 ASP.24 SER.13 VAL.24 LYS.25 ILE.25 PRO.18 GLY.28 THR.22 PHE.11 GLU.27 MET.8 HIS.10 LEU.25 ARG.16 TRP.3 ALA.21 ASN.16 TYR.15
2bwfA TOT.76 # ILE.7 SER.7 GLN.5 LYS.7 TRP.1 PRO.3 THR.2 PHE.1 ALA.4 GLY.4 HIS.4 GLU.4 LEU.6 ARG.1 ASP.5 VAL.7 ASN.5 TYR.2 MET.1
3pc6A TOT.96 # CYS.1 MET.2 HIS.5 VAL.6 GLN.5 LYS.3 ILE.3 PRO.7 THR.2 PHE.9 ALA.5 GLY.5 ASP.4 ASN.5 LEU.9 ARG.7 TRP.2 GLU.9 TYR.5 SER.2
4q53A TOT.103 # ASP.6 GLN.5 VAL.9 LYS.10 PRO.1 HIS.4 PHE.8 THR.5 GLY.10 ILE.8 GLU.6 LEU.4 ARG.4 ALA.6 ASN.10 TYR.2 SER.5
2gn4A TOT.329 # CYS.5 ASP.18 VAL.21 GLN.11 LYS.28 PRO.16 GLY.18 THR.19 PHE.18 ASN.20 HIS.7 MET.10 ILE.27 LEU.30 ARG.12 TRP.2 ALA.21 GLU.18 TYR.7 SER.21
1zjjA TOT.261 # GLN.2 ASP.14 SER.12 VAL.20 LYS.20 ILE.24 PRO.14 GLY.25 THR.14 PHE.9 GLU.21 MET.11 HIS.2 LEU.26 ARG.10 TRP.3 ALA.17 ASN.7 TYR.10
3pwxA TOT.214 # ASP.20 SER.26 GLN.8 LYS.10 PRO.3 THR.13 PHE.6 ALA.19 HIS.4 GLY.16 ILE.12 GLU.15 LEU.21 ARG.6 TRP.1 VAL.14 ASN.17 TYR.3
1i3cA TOT.142 # CYS.1 GLN.6 ASP.10 SER.8 VAL.12 LYS.10 ILE.9 PRO.9 THR.7 PHE.3 ALA.8 GLY.5 HIS.3 GLU.11 LEU.22 ARG.6 TRP.1 ASN.8 TYR.3
4aazA TOT.47 # CYS.8 ASP.1 SER.3 LYS.6 ILE.4 PRO.4 THR.5 PHE.2 ASN.1 GLY.2 HIS.1 LEU.2 ARG.4 ALA.1 GLU.3
1p32A TOT.182 # PRO.4 MET.3 ILE.9 GLN.4 VAL.12 LYS.15 THR.14 ASN.9 HIS.5 PHE.10 ALA.9 GLY.8 CYS.1 ASP.18 LEU.18 ARG.4 TRP.3 GLU.19 TYR.4 SER.13
1l8qA TOT.317 # CYS.3 ASP.16 GLN.8 VAL.21 LYS.38 THR.11 ASN.15 HIS.7 PHE.18 ALA.18 GLY.17 ILE.25 LEU.36 ARG.22 PRO.3 GLU.33 TYR.12 SER.14
1aq0A TOT.306 # CYS.2 MET.11 ILE.11 VAL.30 GLN.10 LYS.9 PRO.18 ASP.6 THR.15 PHE.14 ALA.43 GLY.33 HIS.7 GLU.6 LEU.17 ARG.8 TRP.4 ASN.24 TYR.15 SER.23
4ns4A TOT.264 # GLN.11 ILE.22 SER.19 VAL.20 GLY.17 ASN.11 PRO.13 LYS.19 ASP.14 THR.13 PHE.9 ALA.24 MET.6 HIS.5 LEU.22 ARG.7 TRP.3 GLU.18 TYR.11
3b59A TOT.294 # CYS.4 GLN.7 ASP.24 SER.15 VAL.29 LYS.12 ILE.10 PRO.17 THR.12 PHE.17 ALA.30 GLY.29 HIS.14 ASN.9 LEU.20 ARG.15 TRP.6 GLU.16 TYR.8
2omdA TOT.135 # CYS.2 ILE.11 SER.2 ASN.2 GLN.3 LYS.11 PRO.7 THR.3 PHE.7 ALA.9 HIS.4 GLY.12 ASP.3 LEU.9 ARG.8 TRP.2 VAL.11 GLU.20 TYR.5 MET.4
4didB TOT.127 # MET.2 ILE.4 VAL.7 GLN.12 LYS.10 PRO.6 THR.6 PHE.2 ALA.21 HIS.4 GLY.4 ASP.5 GLU.7 LEU.15 ARG.7 TRP.2 ASN.8 TYR.2 SER.3
1vjgA TOT.196 # CYS.4 ASP.13 GLN.9 VAL.16 LYS.8 PRO.10 THR.12 PHE.7 ALA.11 HIS.3 GLY.13 ILE.11 GLU.10 LEU.20 ARG.13 TRP.6 ASN.11 TYR.8 SER.11
4js1A TOT.318 # CYS.6 MET.8 GLN.14 ILE.19 SER.24 VAL.16 LYS.24 PRO.22 HIS.8 THR.16 GLU.16 GLY.17 ASP.18 LEU.28 ARG.12 TRP.8 ALA.12 ASN.18 TYR.18 PHE.14
2h2wA TOT.280 # CYS.2 GLN.6 ASP.15 SER.11 VAL.20 LYS.13 PRO.20 GLY.12 THR.19 PHE.15 ALA.14 HIS.10 MET.4 ILE.21 GLU.22 LEU.28 ARG.12 TRP.7 ASN.11 TYR.18
4fx0A TOT.122 # CYS.3 GLN.6 ILE.4 SER.5 VAL.9 LYS.2 ASN.3 PRO.3 THR.11 PHE.2 ALA.19 GLY.8 ASP.5 LEU.13 ARG.16 TRP.2 GLU.7 TYR.2 MET.2
3so5A TOT.93 # CYS.2 ASP.4 ASN.5 GLN.6 ILE.5 PRO.4 THR.8 PHE.5 ALA.9 GLY.5 HIS.2 LEU.6 ARG.3 TRP.1 VAL.5 GLU.6 TYR.4 SER.13
1jnrB TOT.149 # CYS.9 ASP.7 SER.7 GLN.3 LYS.13 ASN.4 PRO.13 THR.8 PHE.6 ALA.9 GLY.11 ILE.7 LEU.8 ARG.7 TRP.3 VAL.8 GLU.14 TYR.6 MET.6
3nyiA TOT.285 # CYS.4 GLN.7 ASP.24 SER.23 VAL.29 LYS.22 PRO.9 THR.16 PHE.14 ASN.11 HIS.2 GLY.23 ILE.19 LEU.25 ARG.10 ALA.16 GLU.17 TYR.14
3enpA TOT.159 # CYS.2 GLN.7 ILE.19 SER.12 VAL.11 LYS.11 PRO.5 THR.11 PHE.5 GLU.10 HIS.2 GLY.7 ASP.8 LEU.22 ARG.4 ALA.8 ASN.11 TYR.4
3ohrA TOT.275 # CYS.4 ASP.16 GLN.16 VAL.15 LYS.2 ASN.5 PRO.14 HIS.6 PHE.12 THR.14 GLY.34 ILE.29 LEU.23 ARG.8 TRP.3 ALA.28 GLU.16 TYR.15 SER.15
4b62A TOT.138 # GLN.5 ILE.5 SER.9 VAL.13 LYS.1 PRO.5 ASP.11 THR.9 PHE.5 ALA.22 GLY.8 HIS.1 GLU.9 LEU.12 ARG.17 TRP.1 ASN.4 TYR.1
3cl3A TOT.163 # CYS.4 ILE.5 SER.9 GLN.6 MET.4 ASN.2 PRO.7 LYS.2 THR.11 PHE.8 ALA.10 HIS.4 GLY.9 ASP.12 LEU.31 ARG.14 TRP.1 VAL.11 GLU.9 TYR.4
3cl3D TOT.50 # GLN.8 HIS.3 SER.3 VAL.5 LYS.3 GLY.2 PHE.1 ASN.1 MET.2 ILE.1 LEU.3 ARG.4 ASP.2 ALA.6 GLU.4 TYR.2
4bbrM TOT.167 # CYS.8 GLN.3 HIS.3 SER.10 VAL.12 LYS.10 ASN.9 PRO.6 THR.11 PHE.5 ALA.14 GLY.11 ASP.14 ILE.11 LEU.14 ARG.8 TRP.1 GLU.9 TYR.2 MET.6
3dljA TOT.436 # CYS.2 GLN.13 ASP.27 SER.26 VAL.41 MET.13 PRO.26 LYS.15 THR.21 PHE.22 ASN.13 HIS.13 GLY.34 ILE.31 LEU.43 ARG.15 TRP.7 ALA.31 GLU.31 TYR.12
2rekA TOT.155 # CYS.2 GLN.5 ILE.4 SER.8 VAL.9 MET.1 ASN.2 PRO.4 THR.10 PHE.3 ALA.39 HIS.7 GLY.12 ASP.8 LEU.21 ARG.10 TRP.2 GLU.7 TYR.1
4bq2A TOT.745 # CYS.1 GLN.22 ILE.30 SER.57 VAL.49 GLY.55 PRO.41 LYS.43 ASP.59 THR.34 PHE.34 ALA.63 MET.22 HIS.21 GLU.37 LEU.54 ARG.29 TRP.19 ASN.34 TYR.41
1s9uA TOT.198 # CYS.1 ASP.11 VAL.9 GLN.14 LYS.2 THR.7 PRO.14 HIS.8 PHE.12 ALA.25 GLY.8 ILE.5 GLU.13 LEU.30 ARG.10 TRP.10 ASN.3 TYR.4 SER.12
2w3qA TOT.223 # CYS.3 GLN.10 HIS.7 SER.11 VAL.24 LYS.10 ASN.12 PRO.17 ASP.12 THR.8 PHE.9 ALA.16 GLY.19 ILE.11 LEU.16 ARG.10 TRP.4 GLU.15 TYR.4 MET.5
4jzeH TOT.228 # CYS.9 HIS.9 SER.14 GLN.10 LYS.4 ILE.10 PRO.13 THR.14 PHE.6 ASN.6 GLY.24 ASP.10 LEU.27 ARG.12 TRP.7 ALA.12 VAL.22 GLU.9 TYR.6 MET.4
1ycyA TOT.46 # GLN.1 ILE.5 SER.1 VAL.5 LYS.2 ASN.2 THR.2 PHE.2 ALA.1 HIS.1 GLY.6 ASP.4 LEU.9 ARG.1 TRP.2 GLU.2
3ol3A TOT.94 # GLN.4 ASP.5 SER.4 VAL.9 LYS.4 ASN.3 PRO.7 GLY.5 THR.6 PHE.2 ALA.11 MET.1 HIS.2 ILE.5 LEU.10 ARG.5 TRP.2 GLU.7 TYR.2
2h8uA TOT.65 # CYS.8 GLN.3 ILE.4 SER.5 VAL.2 LYS.11 PRO.4 THR.2 ALA.4 GLY.4 ASP.1 GLU.4 LEU.4 ARG.2 TRP.2 ASN.4 TYR.1
4wcjA TOT.230 # CYS.4 GLN.10 ASP.12 SER.10 VAL.22 LYS.9 ASN.1 PRO.13 THR.13 PHE.15 ALA.18 GLY.19 HIS.7 ILE.6 LEU.26 ARG.18 TRP.5 GLU.10 TYR.10 MET.2
4pjwB TOT.73 # CYS.1 GLN.2 ASP.5 SER.5 VAL.4 LYS.9 ASN.2 PRO.5 THR.7 PHE.2 ALA.3 GLY.2 ILE.3 LEU.13 ARG.4 TRP.2 GLU.3 TYR.1
1wkuA TOT.225 # CYS.4 ILE.18 SER.8 GLN.6 LYS.20 ASN.12 PRO.8 THR.11 PHE.9 ALA.20 HIS.6 GLY.12 ASP.14 LEU.23 ARG.12 TRP.5 VAL.11 GLU.15 TYR.5 MET.6
2wiuB TOT.71 # CYS.1 ASP.2 SER.5 GLN.6 LYS.6 PRO.2 GLY.2 THR.8 PHE.3 ALA.4 MET.2 ILE.5 GLU.4 LEU.9 ARG.1 TRP.2 VAL.1 ASN.7 TYR.1
4n82A TOT.148 # CYS.2 ILE.11 SER.8 GLN.5 LYS.9 PRO.5 THR.7 PHE.10 GLU.13 HIS.3 GLY.11 ASP.9 LEU.15 ARG.6 ALA.6 VAL.10 ASN.8 TYR.7 MET.3
3o8sA TOT.131 # CYS.3 GLN.6 ILE.4 SER.7 VAL.12 LYS.7 ASN.6 PRO.6 THR.6 PHE.6 ALA.9 HIS.2 GLY.8 ASP.11 LEU.17 ARG.5 TRP.3 GLU.12 TYR.1
4eguA TOT.117 # CYS.3 GLN.3 ILE.12 SER.4 ASN.8 VAL.10 LYS.11 PRO.6 THR.2 PHE.4 ALA.6 GLY.8 HIS.7 LEU.7 ARG.3 ASP.10 GLU.6 TYR.5 MET.2
3e6mA TOT.142 # CYS.1 ILE.6 SER.13 GLN.5 LYS.11 ASN.4 PRO.9 HIS.2 PHE.3 ALA.8 GLY.10 ASP.5 LEU.23 ARG.7 TRP.1 THR.12 VAL.9 GLU.10 TYR.3
4o8uA TOT.217 # GLN.2 ASP.13 SER.12 VAL.20 LYS.15 ASN.5 PRO.11 THR.7 PHE.5 ALA.18 HIS.2 GLY.19 ILE.24 LEU.19 ARG.13 TRP.4 GLU.19 TYR.9
3pmmA TOT.365 # CYS.2 ASP.20 SER.12 GLN.22 LYS.11 ILE.18 ASN.14 THR.23 PHE.14 ALA.33 GLY.29 HIS.11 LEU.42 ARG.25 TRP.14 PRO.14 VAL.18 GLU.25 TYR.18
1usmA TOT.77 # MET.2 GLN.1 HIS.3 ASN.3 VAL.6 LYS.3 PRO.2 THR.6 PHE.4 ALA.8 GLY.4 ASP.4 LEU.7 ARG.10 TRP.4 GLU.9 SER.1
3pfgA TOT.241 # CYS.2 GLN.4 HIS.14 SER.15 VAL.18 MET.5 ILE.6 PRO.11 LYS.3 THR.14 PHE.11 ALA.30 GLY.26 ASP.13 ASN.2 LEU.22 ARG.19 TRP.2 GLU.18 TYR.6
3ziaG TOT.265 # CYS.1 GLN.9 ILE.26 SER.22 VAL.10 LYS.27 ASN.18 PRO.9 GLY.10 THR.17 PHE.8 ALA.28 MET.9 HIS.3 LEU.20 ARG.11 ASP.14 GLU.16 TYR.7
4f0zA TOT.357 # CYS.11 GLN.10 ILE.16 SER.16 VAL.23 LYS.19 THR.17 PRO.20 HIS.11 PHE.23 ALA.20 GLY.18 ASP.22 GLU.22 LEU.40 ARG.18 TRP.4 ASN.20 TYR.18 MET.9
4f0zC TOT.30 # CYS.2 GLN.1 ILE.3 SER.1 VAL.2 LYS.5 PRO.2 THR.1 PHE.1 GLU.3 GLY.1 ASP.1 LEU.3 ASN.3 TYR.1
4f0zB TOT.155 # CYS.2 ASP.18 VAL.11 GLN.9 LYS.13 ASN.7 PRO.3 GLY.13 HIS.1 PHE.12 ALA.4 MET.5 ILE.10 LEU.14 ARG.6 THR.3 GLU.12 TYR.3 SER.9
2po3A TOT.393 # CYS.5 ASP.31 VAL.28 GLN.7 GLY.36 ASN.11 PRO.22 LYS.4 THR.21 PHE.14 ALA.61 HIS.19 MET.5 ILE.11 LEU.43 ARG.34 TRP.3 GLU.19 TYR.6 SER.13
4cvnA TOT.179 # CYS.1 MET.2 ASP.11 ASN.5 VAL.21 LYS.11 THR.7 PRO.5 HIS.4 PHE.2 ALA.9 GLY.16 ILE.18 LEU.19 ARG.11 TRP.1 GLU.26 TYR.6 SER.4
3ziaJ TOT.36 # GLN.2 ASP.2 SER.5 VAL.2 LYS.2 PRO.1 THR.3 PHE.3 ALA.2 GLY.4 ARG.5 GLU.5
4cvnE TOT.126 # ILE.12 SER.7 GLN.1 LYS.8 ASN.2 PRO.8 THR.7 ALA.17 HIS.4 GLY.16 ASP.5 LEU.4 ARG.14 TRP.2 VAL.7 GLU.7 TYR.3 MET.2
3ziaH TOT.124 # CYS.1 GLN.8 ILE.5 SER.12 VAL.14 LYS.7 PRO.6 THR.5 PHE.6 ALA.13 GLY.6 HIS.2 GLU.12 LEU.14 ARG.2 ASP.2 ASN.7 TYR.1 MET.1
3ziaI TOT.58 # ILE.3 SER.7 GLN.4 LYS.4 ASN.3 PRO.2 THR.6 PHE.1 ALA.10 GLY.1 ASP.1 LEU.4 ARG.3 TRP.1 VAL.2 GLU.2 TYR.4
4cofA TOT.340 # CYS.4 MET.12 ASP.21 GLN.8 VAL.29 LYS.11 PRO.15 THR.25 PHE.21 ALA.19 HIS.4 GLY.17 ILE.24 GLU.11 LEU.35 ARG.22 TRP.7 ASN.15 TYR.22 SER.18
4ex6A TOT.219 # CYS.1 ILE.9 SER.9 VAL.23 MET.6 PRO.14 LYS.3 THR.14 PHE.3 ALA.37 HIS.3 GLY.27 ASP.16 LEU.22 ARG.17 GLU.12 TYR.3
4qtsC TOT.186 # CYS.4 GLN.1 ILE.19 SER.11 VAL.10 LYS.23 TRP.1 PRO.7 THR.2 PHE.7 GLU.23 GLY.19 HIS.3 LEU.18 ARG.9 ASP.11 ALA.4 ASN.6 TYR.6 MET.2
4qtsA TOT.311 # CYS.1 MET.3 ASP.17 GLN.4 VAL.13 LYS.46 THR.4 PRO.11 HIS.7 PHE.17 ASN.24 GLY.14 ILE.42 LEU.32 ARG.4 TRP.1 ALA.8 GLU.31 TYR.17 SER.15
3m94A TOT.166 # CYS.3 ILE.11 VAL.14 GLN.7 GLY.11 ASN.6 PRO.6 LYS.6 ASP.14 THR.5 PHE.4 ALA.9 MET.4 HIS.5 LEU.18 ARG.8 TRP.9 GLU.12 TYR.7 SER.7
4kncA TOT.395 # CYS.4 GLN.19 ASP.21 SER.27 VAL.22 LYS.17 PRO.18 THR.21 PHE.22 ALA.38 HIS.9 GLY.30 ILE.14 GLU.26 LEU.37 ARG.23 TRP.7 ASN.16 TYR.19 MET.5
4qjiA TOT.199 # CYS.1 GLN.4 ASP.15 SER.11 VAL.21 LYS.4 ASN.7 PRO.7 THR.8 PHE.5 ALA.37 GLY.20 HIS.5 ILE.9 LEU.19 ARG.14 TRP.1 GLU.5 TYR.1 MET.5
3ctzA TOT.617 # CYS.12 GLN.16 ILE.38 SER.37 VAL.43 MET.14 ASN.16 PRO.33 LYS.36 THR.41 PHE.20 ALA.46 HIS.17 GLY.39 ASP.42 LEU.58 ARG.29 TRP.13 GLU.45 TYR.22
1aocA TOT.175 # CYS.16 GLN.7 HIS.5 SER.12 VAL.16 LYS.7 ILE.6 PRO.10 THR.11 PHE.13 ASN.5 GLY.14 ASP.5 LEU.5 ARG.16 TRP.1 ALA.8 GLU.13 TYR.5
4fddA TOT.835 # CYS.26 MET.25 ASP.49 GLN.47 VAL.48 LYS.43 PRO.48 THR.33 PHE.34 ALA.53 HIS.18 GLY.33 ILE.61 GLU.51 LEU.115 ARG.31 TRP.12 ASN.42 TYR.21 SER.45
3trhA TOT.160 # CYS.2 ILE.12 SER.8 GLN.8 LYS.11 PRO.6 THR.12 PHE.5 ALA.28 HIS.4 GLY.14 ASP.6 GLU.8 LEU.18 ARG.4 VAL.10 ASN.4
4i2zA TOT.844 # CYS.19 ASP.56 GLN.24 VAL.61 LYS.65 ASN.31 PRO.27 THR.41 PHE.28 ALA.93 HIS.15 GLY.42 ILE.50 LEU.101 ARG.49 TRP.8 GLU.77 TYR.17 SER.40
3mg1A TOT.302 # CYS.3 ILE.19 GLN.18 VAL.19 MET.8 ASN.18 PRO.19 LYS.10 THR.20 PHE.17 ALA.35 GLY.21 ASP.13 LEU.30 ARG.13 TRP.5 GLU.18 TYR.5 SER.11
2bkaA TOT.231 # CYS.4 GLN.7 ASP.14 SER.16 VAL.23 LYS.20 ASN.8 PRO.5 THR.6 PHE.14 ALA.15 HIS.4 GLY.20 ILE.4 LEU.26 ARG.16 TRP.2 GLU.19 TYR.5 MET.3
1wrjA TOT.149 # CYS.3 GLN.1 ASP.10 SER.7 VAL.15 LYS.15 PRO.6 THR.6 PHE.11 ALA.6 HIS.1 GLY.11 ILE.8 GLU.10 LEU.14 ARG.9 TRP.1 ASN.5 TYR.7 MET.3
4ewtA TOT.380 # CYS.3 GLN.10 ASP.21 SER.18 VAL.35 LYS.28 ASN.11 PRO.18 THR.26 PHE.16 ALA.30 HIS.14 GLY.35 ILE.20 LEU.26 ARG.11 GLU.31 TYR.17 MET.10
2j5gA TOT.248 # GLN.9 HIS.8 SER.9 VAL.17 LYS.9 ASN.13 PRO.10 ARG.16 THR.18 PHE.9 ALA.17 GLY.17 ILE.14 LEU.31 TRP.5 ASP.14 GLU.18 TYR.10 MET.4
4gqcA TOT.160 # CYS.3 GLN.2 ILE.5 SER.4 VAL.17 LYS.15 ASN.10 PRO.10 THR.5 PHE.9 ALA.14 HIS.1 GLY.5 ASP.11 LEU.18 ARG.7 TRP.2 GLU.14 TYR.6 MET.2
2dx0A TOT.117 # CYS.3 ASP.5 SER.7 GLN.3 LYS.6 ASN.4 PRO.5 THR.11 PHE.7 ALA.6 GLY.5 HIS.5 ILE.3 LEU.11 ARG.9 TRP.2 VAL.5 GLU.12 TYR.6 MET.2
3f66A TOT.288 # CYS.6 GLN.8 HIS.12 SER.19 VAL.25 MET.9 ASN.9 PRO.15 LYS.18 ASP.14 THR.13 PHE.15 ALA.14 GLY.18 ILE.16 LEU.34 ARG.13 TRP.4 GLU.15 TYR.11
4o5jA TOT.363 # CYS.4 GLN.30 ILE.22 SER.33 VAL.22 LYS.22 PRO.14 THR.28 PHE.12 ALA.37 HIS.2 GLY.13 ASP.9 GLU.12 LEU.29 ARG.3 TRP.2 ASN.44 TYR.19 MET.6
4rs2A TOT.180 # CYS.2 GLN.6 ASP.16 ASN.3 VAL.15 MET.1 ILE.5 PRO.7 LYS.2 THR.6 PHE.9 ALA.19 GLY.18 HIS.8 LEU.23 ARG.13 TRP.2 GLU.13 TYR.6 SER.6
1ve3A TOT.208 # CYS.1 ASP.11 GLN.3 VAL.21 LYS.19 ASN.6 PRO.7 THR.9 PHE.17 ALA.6 HIS.1 GLY.12 ILE.12 LEU.19 ARG.15 TRP.1 GLU.23 TYR.13 SER.12
3f1zA TOT.116 # ASP.8 SER.11 GLN.9 LYS.7 PRO.5 THR.8 PHE.5 ALA.9 HIS.2 GLY.8 ILE.6 GLU.2 LEU.6 ARG.5 TRP.1 VAL.14 ASN.6 TYR.4
1tisA TOT.285 # CYS.5 MET.6 GLN.13 ASP.17 ASN.15 VAL.17 LYS.22 PRO.13 THR.12 PHE.12 ALA.13 HIS.7 GLY.20 ILE.21 LEU.31 ARG.13 TRP.7 GLU.14 TYR.15 SER.12
1jq0A TOT.65 # ILE.4 VAL.4 GLN.12 MET.1 ASN.3 LYS.3 THR.4 PHE.1 ALA.3 GLY.4 ASP.2 LEU.12 ARG.2 TRP.3 GLU.6 TYR.1
3fldA TOT.152 # GLN.5 ASP.11 SER.8 VAL.11 LYS.3 ASN.8 PRO.9 THR.4 PHE.5 ALA.18 GLY.24 ILE.5 LEU.11 ARG.17 TRP.3 GLU.6 TYR.2 MET.2
1nyrA TOT.642 # CYS.2 ILE.39 SER.29 GLN.29 GLY.40 PRO.25 LYS.48 THR.29 PHE.27 ALA.35 HIS.19 MET.21 ASP.50 GLU.60 LEU.50 ARG.35 TRP.6 VAL.45 ASN.26 TYR.27
1p5dX TOT.442 # CYS.7 MET.8 ASP.33 GLN.12 VAL.43 LYS.18 PRO.24 THR.21 PHE.17 ASN.16 HIS.5 GLY.44 ILE.31 LEU.40 ARG.24 TRP.5 ALA.36 GLU.24 TYR.11 SER.23
2bsyA TOT.249 # CYS.4 GLN.11 ASP.9 SER.18 VAL.17 LYS.8 ILE.10 PRO.22 THR.19 PHE.10 ALA.11 GLY.18 HIS.12 GLU.5 LEU.32 ARG.19 TRP.3 ASN.7 TYR.9 MET.5
4jp0A TOT.378 # CYS.2 GLN.24 HIS.6 SER.30 VAL.15 LYS.28 ILE.36 PRO.14 THR.33 PHE.5 GLU.20 GLY.19 ASP.27 LEU.30 ARG.5 TRP.7 ALA.11 ASN.36 TYR.23 MET.7
2je8A TOT.837 # CYS.7 GLN.35 ASP.48 SER.55 VAL.55 LYS.46 PRO.44 GLY.51 THR.47 PHE.40 ALA.40 HIS.21 MET.24 ILE.44 GLU.56 LEU.73 ARG.43 TRP.22 ASN.44 TYR.42
3bmbA TOT.135 # CYS.1 ASP.10 SER.7 GLN.4 GLY.8 ASN.5 PRO.9 LYS.2 THR.6 PHE.1 ALA.14 HIS.3 MET.5 ILE.7 LEU.18 ARG.8 TRP.1 VAL.11 GLU.11 TYR.4
3ro0A TOT.207 # CYS.2 GLN.8 ILE.20 SER.10 VAL.14 LYS.12 ASN.7 PRO.15 THR.10 PHE.6 ALA.21 HIS.8 GLY.18 ASP.8 LEU.13 ARG.8 TRP.2 GLU.17 TYR.5 MET.3
3cjeA TOT.145 # CYS.4 ASP.9 SER.3 GLN.5 LYS.9 ASN.3 PRO.8 THR.10 PHE.8 ALA.19 HIS.2 GLY.10 ILE.9 LEU.12 ARG.7 TRP.2 VAL.13 GLU.11 TYR.1
2gzmA TOT.266 # CYS.4 GLN.9 ILE.23 SER.14 VAL.24 LYS.16 ASN.10 PRO.12 THR.19 PHE.6 ALA.13 GLY.21 HIS.8 LEU.27 ARG.11 TRP.2 ASP.8 GLU.25 TYR.7 MET.7
4n01A TOT.287 # GLN.12 ASP.24 SER.19 VAL.19 LYS.29 ASN.9 PRO.14 THR.21 PHE.13 ALA.25 HIS.3 GLY.17 ILE.23 LEU.18 ARG.8 TRP.7 GLU.19 TYR.7
1o98A TOT.509 # CYS.4 GLN.13 ASP.34 SER.18 VAL.34 LYS.31 ASN.20 PRO.28 THR.29 PHE.19 ALA.38 HIS.19 GLY.45 ILE.36 LEU.44 ARG.26 TRP.2 GLU.38 TYR.22 MET.9
3ot1A TOT.193 # CYS.4 ASP.7 GLN.16 VAL.17 LYS.4 ILE.8 PRO.8 THR.12 PHE.10 ALA.32 GLY.15 HIS.6 ASN.1 LEU.23 ARG.7 TRP.1 GLU.10 TYR.2 SER.10
2hipA TOT.71 # CYS.4 ASP.6 GLN.3 VAL.5 LYS.1 ASN.2 PRO.4 THR.1 PHE.2 ALA.10 GLY.7 HIS.4 LEU.2 ARG.3 TRP.3 GLU.8 TYR.3 SER.3
2bt6A TOT.104 # CYS.5 MET.3 ASP.11 GLN.3 VAL.6 LYS.5 ASN.5 PRO.1 THR.10 PHE.4 ALA.5 HIS.3 GLY.8 ILE.8 LEU.12 ARG.4 GLU.7 TYR.1 SER.3
4ewgA TOT.398 # CYS.4 GLN.7 ILE.16 SER.31 VAL.25 GLY.38 ASN.13 PRO.17 LYS.7 THR.29 PHE.12 ALA.58 HIS.8 MET.19 ASP.21 LEU.28 ARG.23 TRP.7 GLU.22 TYR.13
2g2qA TOT.112 # CYS.2 GLN.2 ASP.8 SER.11 VAL.8 LYS.11 ASN.7 PRO.3 THR.5 PHE.7 ALA.5 HIS.2 GLY.5 ILE.11 LEU.11 ARG.1 TRP.1 GLU.7 TYR.5
2hf9A TOT.211 # CYS.3 ILE.20 SER.4 VAL.16 LYS.27 PRO.4 THR.8 PHE.7 ALA.18 GLY.14 HIS.7 GLU.15 LEU.24 ARG.5 ASP.22 ASN.11 TYR.1 MET.5
4he7A TOT.53 # CYS.8 ASP.5 SER.2 GLN.3 LYS.7 PRO.1 HIS.1 PHE.1 ASN.4 GLY.1 ILE.1 LEU.3 ARG.2 ALA.2 VAL.2 GLU.4 TYR.6
3nr5A TOT.157 # CYS.6 GLN.2 ASP.12 SER.21 VAL.7 LYS.8 PRO.6 GLY.3 THR.4 PHE.13 ALA.8 HIS.3 MET.1 ILE.8 GLU.12 LEU.15 ARG.9 TRP.3 ASN.9 TYR.7
3fvzA TOT.329 # CYS.4 GLN.15 HIS.20 SER.27 VAL.31 LYS.14 ILE.16 PRO.20 GLY.28 THR.13 PHE.23 ASN.14 MET.4 ASP.24 LEU.22 ARG.11 TRP.5 ALA.12 GLU.18 TYR.8
1jk0B TOT.265 # CYS.2 ILE.22 SER.13 GLN.8 MET.10 PRO.9 LYS.23 THR.9 PHE.19 GLU.27 HIS.5 GLY.10 ASP.14 LEU.21 ARG.9 TRP.4 ALA.24 VAL.8 ASN.14 TYR.14
4l5eA TOT.46 # ILE.7 SER.2 VAL.2 LYS.9 ASN.2 PRO.1 THR.1 PHE.1 ALA.1 GLY.2 HIS.1 LEU.6 ARG.2 GLU.7 TYR.2
1smoA TOT.113 # CYS.3 ASP.7 GLN.7 VAL.9 LYS.9 ASN.2 PRO.6 GLY.5 THR.6 PHE.2 ALA.4 HIS.4 MET.3 ILE.6 LEU.12 ARG.7 TRP.1 GLU.10 TYR.5 SER.5
1i1nA TOT.224 # CYS.3 GLN.10 ASP.16 SER.14 VAL.17 LYS.15 ILE.14 PRO.12 GLY.23 THR.7 PHE.4 ALA.19 MET.8 HIS.8 GLU.9 LEU.21 ARG.8 TRP.3 ASN.6 TYR.7
1vdhA TOT.247 # CYS.1 GLN.9 ASP.13 SER.14 VAL.17 LYS.12 ASN.3 PRO.15 THR.4 PHE.14 ALA.17 GLY.21 HIS.6 ILE.3 LEU.28 ARG.20 TRP.7 GLU.25 TYR.13 MET.5
2b3zA TOT.359 # CYS.5 ILE.29 GLN.15 VAL.27 MET.10 THR.23 PRO.17 LYS.24 HIS.10 PHE.12 ALA.35 GLY.31 ASP.17 ASN.7 LEU.28 ARG.14 TRP.2 GLU.26 TYR.9 SER.18
4gj1A TOT.215 # CYS.6 GLN.5 HIS.3 SER.11 VAL.23 LYS.21 ASN.6 PRO.4 THR.5 PHE.6 ALA.16 GLY.19 ILE.19 LEU.30 ARG.5 ASP.14 GLU.15 TYR.7
2xb3A TOT.151 # ILE.8 VAL.20 GLN.7 LYS.5 PRO.7 ASP.7 THR.10 PHE.4 ALA.11 GLY.7 HIS.2 GLU.12 LEU.11 ARG.7 TRP.2 ASN.4 TYR.9 SER.18
4dikA TOT.402 # CYS.1 GLN.1 ASP.26 SER.21 VAL.30 LYS.38 PRO.19 GLY.29 THR.18 PHE.16 GLU.37 HIS.14 MET.7 ILE.38 LEU.37 ARG.13 TRP.7 ALA.20 ASN.12 TYR.18
4nczA TOT.168 # CYS.1 HIS.9 GLN.6 VAL.9 LYS.7 ILE.15 PRO.3 THR.3 PHE.10 GLU.20 GLY.7 ASP.6 LEU.19 ARG.12 TRP.1 ALA.9 ASN.15 TYR.10 SER.6
4c5eA TOT.423 # CYS.15 GLN.6 ASP.35 SER.26 VAL.35 LYS.16 ILE.19 PRO.25 THR.23 PHE.23 ASN.16 GLY.30 HIS.15 LEU.34 ARG.18 TRP.13 ALA.27 GLU.21 TYR.16 MET.10
3pio1 TOT.53 # GLN.1 HIS.1 SER.2 VAL.4 MET.1 ILE.2 PRO.2 LYS.10 THR.5 PHE.2 ALA.4 GLY.3 ASP.2 ASN.2 ARG.4 GLU.3 TYR.3 LEU.2
2wcrA TOT.145 # ASP.9 SER.10 GLN.8 GLY.5 PRO.3 LYS.11 THR.7 PHE.5 ALA.9 HIS.3 MET.5 ILE.14 GLU.11 LEU.11 ARG.7 TRP.1 VAL.11 ASN.10 TYR.5
3laaA TOT.169 # GLN.2 ILE.11 SER.22 VAL.12 LYS.1 PRO.7 THR.22 PHE.4 ALA.33 HIS.1 GLY.20 ASP.6 GLU.1 LEU.3 ARG.2 ASN.16 TYR.6
2cwrA TOT.97 # GLN.4 ILE.5 SER.6 VAL.12 LYS.6 ASN.7 PRO.5 THR.7 PHE.4 ALA.5 GLY.13 ASP.5 LEU.5 TRP.4 GLU.6 TYR.3
4rpfA TOT.310 # CYS.11 GLN.18 HIS.7 SER.18 VAL.22 MET.13 TRP.4 PRO.15 LYS.9 THR.10 PHE.11 ASN.10 GLY.32 ILE.17 LEU.28 ARG.13 ASP.16 ALA.34 GLU.14 TYR.8
4hl2A TOT.243 # CYS.1 ASP.17 SER.13 VAL.15 GLN.12 LYS.8 ASN.11 PRO.12 THR.16 PHE.9 ALA.37 GLY.23 HIS.9 ILE.13 LEU.17 ARG.9 TRP.4 GLU.5 TYR.4 MET.8
2hwjA TOT.190 # CYS.1 ILE.11 SER.11 GLN.3 LYS.11 THR.3 PRO.9 HIS.9 PHE.10 ALA.17 GLY.13 ASP.17 GLU.14 LEU.21 ARG.18 TRP.4 VAL.12 ASN.3 TYR.3
4y0dA TOT.459 # CYS.10 GLN.14 HIS.14 SER.32 VAL.22 LYS.26 ILE.31 PRO.25 THR.18 PHE.30 ALA.29 GLY.33 ASP.26 GLU.31 LEU.41 ARG.27 TRP.5 ASN.21 TYR.11 MET.13
4ub6B TOT.504 # CYS.2 GLN.13 ILE.25 SER.27 VAL.34 MET.11 ASN.13 PRO.32 LYS.13 THR.28 PHE.44 ALA.46 GLY.56 HIS.14 LEU.44 ARG.24 TRP.18 ASP.20 GLU.25 TYR.15
3jtzA TOT.75 # ILE.5 SER.9 GLN.2 LYS.7 ASN.1 PHE.1 PRO.4 HIS.2 THR.2 ALA.6 GLY.6 ASP.4 LEU.10 ARG.6 TRP.1 VAL.2 GLU.2 TYR.4 MET.1
4ub6D TOT.342 # CYS.4 GLN.11 HIS.8 SER.19 VAL.21 MET.8 PRO.15 LYS.3 ASP.9 THR.19 PHE.37 ALA.32 GLY.33 ILE.16 GLU.16 LEU.40 ARG.15 TRP.14 ASN.14 TYR.8
4pr3A TOT.193 # CYS.2 GLN.4 HIS.3 SER.15 VAL.20 LYS.7 PRO.10 THR.8 PHE.4 ALA.29 GLY.19 ILE.8 GLU.11 LEU.24 ARG.9 ASP.12 ASN.2 TYR.6
4ub6H TOT.65 # ILE.5 SER.3 VAL.5 LYS.2 PRO.3 THR.4 PHE.3 ALA.4 GLY.7 ASP.2 GLU.2 LEU.12 ARG.3 TRP.3 ASN.3 TYR.2 MET.2
2y3nB TOT.59 # GLN.2 ASP.7 SER.3 VAL.4 MET.3 LYS.5 THR.1 PHE.3 ALA.7 GLY.6 ILE.6 GLU.1 LEU.5 ASN.5 TYR.1
2i6vA TOT.87 # GLN.8 ASP.9 SER.5 VAL.9 MET.5 PRO.3 LYS.3 THR.4 PHE.4 ALA.2 HIS.1 GLY.6 ILE.3 GLU.5 LEU.9 ARG.4 ASN.4 TYR.3
4mt4A TOT.472 # CYS.1 ASP.26 SER.40 GLN.19 LYS.35 PRO.8 THR.20 PHE.20 ALA.42 HIS.2 GLY.27 ILE.29 GLU.35 LEU.50 ARG.16 TRP.7 VAL.18 ASN.45 TYR.27 MET.5
1te5A TOT.253 # CYS.4 GLN.8 ASP.16 SER.12 VAL.22 LYS.8 ASN.8 PRO.16 THR.16 PHE.16 ALA.19 HIS.5 GLY.24 ILE.10 LEU.23 ARG.17 TRP.7 GLU.15 TYR.5 MET.2
4ifsA TOT.225 # CYS.4 ILE.17 SER.14 GLN.6 LYS.16 ASN.9 PRO.10 THR.17 PHE.19 ALA.6 HIS.7 GLY.13 ASP.10 LEU.22 ARG.16 VAL.11 GLU.12 TYR.11 MET.5
2yx1A TOT.320 # CYS.5 GLN.2 ASP.22 ASN.16 VAL.23 LYS.43 PHE.11 PRO.10 HIS.7 THR.5 ALA.14 GLY.16 ILE.38 LEU.34 ARG.18 TRP.1 GLU.30 TYR.13 SER.12
1llnA TOT.248 # CYS.4 ILE.13 SER.16 VAL.15 GLN.8 LYS.18 ASN.15 PRO.9 THR.23 PHE.8 ALA.16 HIS.2 GLY.19 ASP.18 LEU.20 ARG.8 TRP.2 GLU.15 TYR.12 MET.7
3ay5A TOT.293 # CYS.5 ASP.17 SER.19 GLN.16 VAL.25 LYS.16 ILE.19 PRO.15 THR.12 PHE.6 GLU.24 GLY.5 HIS.6 LEU.40 ARG.14 TRP.4 ALA.28 ASN.9 TYR.4 MET.9
1sh8A TOT.153 # HIS.4 SER.8 GLN.5 MET.4 PRO.8 LYS.4 THR.7 PHE.6 ASN.2 GLY.13 ILE.5 LEU.19 ARG.16 ASP.4 ALA.18 VAL.7 GLU.18 TYR.5
2ymuA TOT.577 # GLN.40 HIS.16 SER.85 VAL.43 LYS.29 ILE.14 PRO.14 THR.54 PHE.14 ALA.43 GLY.55 ASP.42 GLU.2 LEU.53 ARG.22 TRP.21 ASN.29 MET.1
3n9tA TOT.286 # CYS.3 GLN.14 HIS.8 SER.14 VAL.25 MET.9 ASN.9 PRO.18 LYS.8 THR.15 PHE.15 ALA.21 GLY.24 ASP.25 ILE.9 LEU.21 ARG.15 TRP.3 GLU.17 TYR.13
4r1zA TOT.417 # CYS.9 MET.7 ILE.22 SER.27 GLN.17 VAL.34 LYS.31 ASN.14 PRO.17 HIS.13 THR.22 ALA.23 GLY.27 ASP.24 LEU.48 ARG.23 TRP.7 GLU.27 TYR.9 PHE.16
2v14A TOT.132 # CYS.2 GLN.2 ASP.7 SER.9 VAL.8 LYS.15 THR.7 PRO.6 HIS.5 PHE.12 GLU.10 GLY.5 ILE.7 LEU.14 ARG.9 TRP.1 ALA.6 ASN.2 TYR.5
1yb0A TOT.157 # CYS.4 ILE.10 GLN.5 VAL.13 LYS.12 TRP.4 PRO.8 GLY.12 THR.6 PHE.2 ASN.14 MET.6 HIS.4 LEU.3 ARG.8 ASP.6 ALA.10 GLU.10 TYR.10 SER.10
1nq7A TOT.244 # CYS.7 ILE.18 GLY.7 VAL.13 GLN.19 LYS.17 ASN.11 PRO.7 ASP.9 THR.13 PHE.12 ALA.18 MET.6 HIS.8 LEU.31 ARG.7 TRP.3 GLU.20 TYR.7 SER.11
4ja2A TOT.119 # GLN.3 ASP.5 SER.7 VAL.12 LYS.14 PRO.6 THR.3 PHE.5 ASN.2 HIS.1 GLY.6 ILE.8 LEU.15 ARG.4 TRP.1 ALA.6 GLU.15 TYR.1 MET.5
3zk9A TOT.278 # GLN.8 ASP.20 SER.16 VAL.15 LYS.36 PRO.12 THR.15 PHE.10 ALA.19 HIS.3 GLY.15 ILE.23 GLU.27 LEU.19 ARG.2 TRP.3 ASN.19 TYR.13 MET.3
1y0mA TOT.61 # ILE.3 SER.3 GLN.4 LYS.7 ASN.3 PRO.1 GLY.5 THR.3 PHE.4 ALA.4 MET.1 ASP.4 LEU.3 ARG.2 TRP.3 VAL.3 GLU.5 TYR.3
1x2iA TOT.68 # GLN.1 HIS.2 SER.3 VAL.7 LYS.4 PRO.2 GLY.4 THR.4 PHE.2 ALA.8 MET.1 ILE.6 LEU.8 ARG.7 GLU.8 TYR.1
3tufA TOT.115 # GLN.2 ASP.12 SER.9 VAL.7 LYS.14 ASN.3 PRO.1 GLY.3 THR.11 PHE.2 ALA.12 HIS.1 MET.2 ILE.7 LEU.9 ARG.3 GLU.14 TYR.3
2ya0A TOT.714 # GLN.22 ASP.66 SER.37 VAL.41 LYS.56 PRO.31 THR.46 PHE.29 ALA.60 HIS.20 GLY.49 ILE.35 GLU.37 LEU.57 ARG.30 TRP.9 ASN.41 TYR.37 MET.11
3h63A TOT.315 # CYS.7 ASP.18 SER.18 GLN.16 GLY.24 ILE.15 PRO.16 LYS.21 THR.15 PHE.18 ASN.15 MET.8 HIS.11 LEU.30 ARG.11 TRP.3 ALA.12 VAL.21 GLU.22 TYR.14
3ix1A TOT.296 # HIS.7 GLN.7 VAL.34 LYS.5 ILE.15 PRO.20 GLY.19 THR.10 PHE.11 ALA.27 MET.6 ASP.21 GLU.29 LEU.30 ARG.4 TRP.6 ASN.14 TYR.13 SER.18
2wbtA TOT.125 # CYS.6 GLN.5 ILE.8 SER.14 VAL.9 LYS.13 PRO.5 THR.7 PHE.4 ALA.4 HIS.8 GLY.2 ASP.5 GLU.6 LEU.15 ARG.5 ASN.3 TYR.5 MET.1
1jnmA TOT.56 # GLN.3 ILE.2 SER.4 VAL.2 LYS.9 THR.2 ALA.8 MET.2 GLU.6 LEU.6 ARG.9 ASN.3
2pmiB TOT.213 # CYS.5 GLN.4 ASP.11 SER.18 VAL.17 LYS.15 PRO.10 THR.14 PHE.10 ALA.8 HIS.6 GLY.6 ILE.18 GLU.5 LEU.24 ARG.13 ASN.15 TYR.12 MET.2
3tytA TOT.198 # CYS.6 ASP.9 SER.19 GLN.7 GLY.13 ILE.4 PRO.11 LYS.12 THR.6 PHE.14 ASN.15 MET.9 HIS.4 LEU.15 ARG.7 TRP.1 ALA.11 VAL.15 GLU.13 TYR.7
4dmvA TOT.537 # GLN.22 ILE.48 SER.48 VAL.19 LYS.48 PRO.12 THR.27 PHE.25 ALA.28 HIS.6 GLY.13 ASP.28 GLU.44 LEU.60 ARG.18 TRP.5 ASN.50 TYR.28 MET.8
3vowA TOT.186 # CYS.8 GLN.7 ILE.5 SER.11 VAL.11 LYS.10 ASN.12 PRO.8 THR.11 PHE.14 ALA.8 HIS.3 GLY.7 ASP.8 LEU.14 ARG.13 TRP.8 GLU.14 TYR.11 MET.3
1f7lA TOT.115 # CYS.1 GLN.6 ILE.12 SER.7 VAL.4 LYS.9 PRO.2 THR.6 PHE.6 GLU.10 HIS.2 GLY.9 ASP.4 LEU.8 ARG.8 ALA.13 ASN.2 TYR.5 MET.1
3uw1A TOT.230 # CYS.3 GLN.6 ILE.12 SER.9 VAL.27 LYS.8 PRO.8 THR.14 PHE.5 ALA.29 HIS.2 GLY.26 ASP.15 GLU.14 LEU.21 ARG.16 TRP.1 ASN.5 TYR.5 MET.4
3a2bA TOT.392 # CYS.3 ILE.28 GLN.10 VAL.23 LYS.28 THR.19 PRO.11 GLY.30 HIS.10 PHE.20 ALA.34 MET.11 ASP.29 ASN.14 LEU.40 ARG.13 TRP.2 GLU.25 TYR.9 SER.33
3jy6A TOT.261 # CYS.1 GLN.19 ASP.14 SER.19 VAL.20 MET.6 ASN.9 PRO.8 LYS.10 THR.17 PHE.13 ALA.23 HIS.4 GLY.12 ILE.19 LEU.27 ARG.14 TRP.2 GLU.19 TYR.5
2w20A TOT.470 # GLN.16 ILE.30 SER.31 VAL.27 LYS.38 PRO.19 THR.32 PHE.12 ASN.29 HIS.11 GLY.47 ASP.35 LEU.29 ARG.24 TRP.9 ALA.22 GLU.25 TYR.22 MET.12
1tbuA TOT.96 # GLN.4 ILE.6 SER.9 VAL.7 LYS.6 PRO.6 THR.9 PHE.8 ALA.3 GLY.5 HIS.5 GLU.1 LEU.13 ARG.3 ASP.2 ASN.4 TYR.4 MET.1
3oxnA TOT.207 # CYS.5 ILE.16 SER.11 GLN.13 LYS.6 ASN.3 PRO.17 THR.9 PHE.7 ALA.21 HIS.7 GLY.5 ASP.12 LEU.27 ARG.12 TRP.2 VAL.13 GLU.13 TYR.8
3n3fA TOT.54 # ASP.4 SER.2 GLN.2 LYS.3 ASN.2 PRO.2 THR.3 PHE.4 ALA.3 HIS.1 GLY.3 ILE.5 LEU.7 ARG.3 TRP.1 VAL.3 GLU.3 TYR.1 MET.2
3ts9A TOT.121 # CYS.2 ILE.6 ASN.8 GLN.6 LYS.14 PRO.3 GLY.2 THR.6 PHE.7 ALA.9 HIS.3 MET.6 ASP.9 LEU.10 ARG.4 TRP.1 VAL.2 GLU.13 TYR.6 SER.4
3dlqI TOT.131 # CYS.2 ILE.6 SER.9 GLN.8 LYS.9 PRO.4 GLY.5 THR.5 PHE.8 ALA.7 HIS.2 MET.5 ASP.6 GLU.9 LEU.18 ARG.9 VAL.8 ASN.8 TYR.3
3dlqR TOT.201 # CYS.4 MET.5 ASP.11 GLN.8 VAL.12 LYS.11 ILE.10 PRO.12 THR.24 PHE.8 ASN.4 GLY.11 HIS.6 LEU.18 ARG.12 TRP.4 ALA.8 GLU.12 TYR.8 SER.13
4gxwA TOT.369 # CYS.2 GLN.5 ASP.32 SER.6 VAL.24 LYS.10 ILE.18 PRO.23 THR.20 PHE.16 ALA.55 GLY.24 HIS.15 ASN.11 LEU.28 ARG.31 TRP.9 GLU.21 TYR.11 MET.8
3ke2A TOT.97 # GLN.3 ASP.10 SER.6 VAL.7 LYS.5 ILE.5 PRO.2 THR.4 PHE.3 ALA.10 GLY.9 HIS.5 GLU.4 LEU.11 ARG.6 TRP.2 ASN.2 TYR.3
1odfA TOT.280 # CYS.3 GLN.13 ILE.20 SER.17 VAL.14 LYS.21 ASN.18 PRO.10 THR.17 PHE.18 ALA.4 HIS.5 GLY.23 ASP.19 LEU.31 ARG.8 TRP.4 GLU.17 TYR.13 MET.5
4ozjA TOT.103 # CYS.1 GLN.2 ASP.10 SER.3 VAL.14 LYS.8 PRO.5 THR.7 PHE.1 ALA.14 HIS.2 GLY.10 ILE.7 GLU.5 LEU.6 ARG.4 ASN.3 MET.1
4chbA TOT.279 # CYS.8 GLN.5 ASP.14 SER.23 VAL.39 GLY.32 PRO.8 LYS.3 THR.17 PHE.5 ALA.24 HIS.3 MET.9 ILE.4 GLU.11 LEU.19 ARG.19 TRP.6 ASN.15 TYR.15
4kv7A TOT.357 # CYS.1 HIS.9 VAL.26 GLN.13 LYS.14 ILE.20 PRO.21 THR.18 PHE.16 ALA.44 GLY.29 ASP.22 GLU.18 LEU.39 ARG.18 TRP.2 ASN.12 TYR.9 SER.26
2gsvA TOT.65 # ASP.3 VAL.7 GLN.5 LYS.6 ILE.4 PRO.1 THR.2 PHE.2 GLU.5 GLY.1 HIS.3 LEU.6 ARG.3 ALA.3 ASN.5 TYR.4 SER.5
4jykA TOT.193 # CYS.1 THR.8 ILE.16 SER.11 GLN.8 MET.3 ASN.3 PRO.9 LYS.12 HIS.3 PHE.11 ALA.26 GLY.9 ASP.10 LEU.25 ARG.9 TRP.3 VAL.10 GLU.10 TYR.6
3kkcA TOT.174 # CYS.1 GLN.10 HIS.7 SER.11 VAL.12 LYS.13 PRO.3 ASP.12 THR.9 PHE.11 GLU.16 GLY.3 ILE.10 LEU.25 ARG.9 TRP.2 ALA.5 ASN.5 TYR.10
2bl8A TOT.93 # ILE.9 SER.6 GLN.4 LYS.7 THR.4 PRO.3 HIS.1 PHE.3 ASN.7 GLY.4 ASP.5 LEU.11 ARG.5 ALA.4 VAL.4 GLU.7 TYR.9
3txnA TOT.339 # CYS.5 MET.8 ILE.20 GLN.20 VAL.20 LYS.24 ASN.6 PRO.7 THR.14 PHE.11 ALA.37 HIS.5 GLY.16 ASP.23 LEU.49 ARG.14 TRP.1 GLU.24 TYR.12 SER.23
3seoA TOT.216 # CYS.3 GLN.12 ILE.9 SER.13 VAL.7 LYS.16 PRO.3 THR.15 PHE.12 ASN.11 HIS.3 GLY.9 ASP.13 LEU.23 ARG.10 TRP.1 ALA.25 GLU.19 TYR.7 MET.5
4g9qA TOT.236 # ASP.11 VAL.18 GLN.16 LYS.6 PRO.14 THR.14 PHE.7 ALA.32 HIS.3 GLY.17 ILE.9 GLU.16 LEU.23 ARG.17 TRP.4 ASN.7 TYR.9 SER.13
1k1fA TOT.64 # ILE.3 SER.3 GLN.5 LYS.4 ASN.1 PRO.4 THR.1 PHE.3 ALA.6 GLY.2 ASP.3 LEU.6 ARG.7 TRP.1 VAL.4 GLU.10 TYR.1
2y5pA TOT.72 # GLN.1 ASP.4 SER.2 VAL.7 LYS.7 PRO.3 GLY.7 THR.10 PHE.4 ALA.4 HIS.1 MET.2 ILE.2 GLU.4 LEU.1 ARG.1 TRP.2 ASN.4 TYR.6
2cfuA TOT.627 # ILE.22 GLN.29 VAL.42 MET.10 TRP.10 PRO.31 LYS.13 THR.23 PHE.20 ALA.69 GLY.59 HIS.13 GLU.41 LEU.78 ARG.51 ASP.36 ASN.28 TYR.25 SER.27
2asbA TOT.226 # CYS.2 GLN.6 ASP.11 SER.15 VAL.27 LYS.7 ASN.8 PRO.14 HIS.3 PHE.3 ALA.27 GLY.21 ILE.16 LEU.14 ARG.23 TRP.1 THR.8 GLU.15 TYR.3 MET.2
1lxjA TOT.101 # CYS.2 GLN.3 HIS.5 SER.7 VAL.9 LYS.9 TRP.1 PRO.4 THR.8 PHE.2 ALA.5 GLY.8 ILE.11 LEU.6 ARG.4 ASP.9 GLU.6 TYR.2
2hpgA TOT.308 # CYS.1 ILE.24 VAL.23 GLN.13 LYS.29 THR.11 PRO.13 HIS.4 PHE.14 ALA.26 GLY.24 ASP.10 ASN.13 LEU.25 ARG.11 TRP.6 GLU.35 TYR.14 SER.12
2ynyA TOT.101 # GLN.3 ASP.4 SER.10 VAL.5 LYS.7 PRO.1 THR.3 ALA.7 HIS.2 GLY.7 ILE.17 GLU.11 LEU.9 ARG.3 ASN.7 TYR.5
1fxdA TOT.57 # CYS.5 ASP.8 SER.3 VAL.7 MET.2 ASN.3 PRO.4 LYS.1 PHE.1 ALA.6 GLY.1 ILE.5 LEU.1 ARG.1 GLU.9
3pgxA TOT.267 # CYS.2 GLN.7 ILE.13 SER.17 VAL.27 MET.7 ASN.7 PRO.14 LYS.4 THR.19 PHE.6 ALA.34 HIS.6 GLY.28 ASP.16 LEU.21 ARG.14 TRP.5 GLU.15 TYR.5
3l81A TOT.250 # CYS.2 GLN.13 HIS.7 SER.29 VAL.21 GLY.21 TRP.3 PRO.18 LYS.7 THR.3 PHE.11 ASN.4 MET.3 ILE.7 LEU.41 ARG.21 ASP.11 ALA.8 GLU.16 TYR.4
3p2tA TOT.194 # CYS.6 MET.4 ASP.6 VAL.9 GLN.7 LYS.7 ASN.3 PRO.21 THR.11 PHE.5 ALA.11 GLY.11 HIS.7 ILE.4 LEU.21 ARG.11 TRP.5 GLU.12 TYR.8 SER.25
1a79A TOT.171 # CYS.1 HIS.3 SER.10 VAL.17 LYS.15 TRP.1 PRO.3 THR.5 PHE.7 GLU.12 GLY.12 ILE.9 LEU.24 ARG.10 ASP.11 ALA.8 ASN.8 TYR.14 MET.1
4un1B TOT.154 # CYS.2 GLN.6 HIS.7 SER.13 VAL.10 MET.6 PRO.7 LYS.9 ASP.7 THR.10 PHE.3 ASN.2 GLY.8 ILE.6 LEU.13 ARG.9 TRP.2 ALA.16 GLU.12 TYR.6
2gk3A TOT.239 # CYS.4 ILE.17 SER.15 GLN.9 LYS.13 PRO.11 THR.11 PHE.13 GLU.16 HIS.6 GLY.19 ASP.16 LEU.22 ARG.5 TRP.5 ALA.14 VAL.19 ASN.12 TYR.12
3kvhA TOT.190 # CYS.2 GLN.8 ILE.3 SER.11 VAL.15 GLY.15 ASN.5 PRO.7 LYS.7 THR.6 PHE.10 ALA.17 MET.7 HIS.7 LEU.33 ARG.14 TRP.2 ASP.6 GLU.11 TYR.4
3wu2H TOT.63 # ILE.5 SER.3 VAL.5 LYS.2 PRO.3 THR.4 PHE.3 ALA.4 GLY.6 ASP.2 GLU.2 LEU.11 ARG.3 TRP.3 ASN.3 TYR.2 MET.2
3wu2J TOT.35 # ILE.4 SER.2 VAL.5 GLY.8 PRO.1 THR.1 PHE.2 ALA.4 MET.1 LEU.4 TRP.1 TYR.2
3b8mA TOT.253 # GLN.12 ASP.18 SER.19 VAL.17 LYS.24 ASN.13 PRO.11 GLY.5 THR.14 PHE.9 ALA.19 HIS.1 MET.3 ILE.16 LEU.28 ARG.10 TRP.3 GLU.22 TYR.9
3wu2O TOT.239 # CYS.2 ILE.12 GLN.11 VAL.17 MET.2 ASN.8 PRO.13 LYS.14 THR.24 PHE.11 ALA.19 HIS.2 GLY.18 ASP.16 LEU.20 ARG.11 GLU.17 TYR.6 SER.16
3wu2A TOT.333 # CYS.5 ILE.27 SER.22 GLN.7 GLY.31 ASN.23 PRO.14 LYS.2 ASP.8 THR.13 PHE.27 ALA.34 MET.10 HIS.11 LEU.30 ARG.10 TRP.10 VAL.21 GLU.14 TYR.14
3wu2B TOT.499 # CYS.2 GLN.13 ILE.25 SER.27 VAL.33 MET.11 ASN.13 PRO.32 LYS.13 THR.28 PHE.44 ALA.46 GLY.56 HIS.14 LEU.44 ARG.23 TRP.18 ASP.20 GLU.22 TYR.15
3wu2C TOT.451 # CYS.2 GLN.8 ASP.14 SER.26 VAL.30 MET.11 ILE.29 PRO.24 LYS.12 THR.22 PHE.31 ASN.16 GLY.59 HIS.13 LEU.45 ARG.18 TRP.17 ALA.40 GLU.22 TYR.12
3wu2D TOT.339 # CYS.4 GLN.11 HIS.7 SER.19 VAL.21 MET.8 PRO.15 LYS.3 ASP.9 THR.19 PHE.37 ALA.32 GLY.33 ILE.16 GLU.15 LEU.40 ARG.14 TRP.14 ASN.14 TYR.8
3wu2E TOT.80 # ILE.7 VAL.6 GLN.5 LYS.1 PRO.5 ASP.4 THR.8 PHE.6 ALA.5 GLY.4 HIS.1 LEU.6 ARG.5 TRP.2 GLU.5 TYR.4 SER.6
3wu2F TOT.33 # ILE.4 GLN.2 VAL.4 MET.1 PRO.2 THR.3 PHE.4 ALA.5 GLY.1 HIS.1 LEU.2 ARG.2 TRP.1 TYR.1
1rf6A TOT.427 # CYS.1 GLN.15 ASP.28 SER.27 VAL.33 GLY.41 ILE.40 PRO.16 LYS.26 THR.25 PHE.10 ALA.36 MET.14 HIS.9 GLU.26 LEU.43 ARG.20 TRP.1 ASN.12 TYR.4
3wu2X TOT.36 # GLN.1 ILE.5 SER.3 VAL.4 LYS.2 PRO.1 THR.2 PHE.3 ALA.3 GLY.4 ASP.1 LEU.6 ARG.1
3wu2Z TOT.57 # ILE.5 GLN.1 VAL.11 GLY.4 PRO.2 LYS.1 THR.1 PHE.5 ALA.6 MET.1 ASP.1 LEU.11 TRP.2 ASN.1 TYR.1 SER.4
4kpoA TOT.317 # CYS.5 GLN.6 ILE.17 SER.19 VAL.36 LYS.22 TRP.4 PRO.21 THR.21 PHE.17 ALA.26 GLY.23 HIS.9 GLU.16 LEU.27 ARG.5 ASP.21 ASN.12 TYR.5 MET.5
1gq8A TOT.318 # CYS.3 ILE.18 SER.27 GLN.15 LYS.15 TRP.5 PRO.12 THR.28 PHE.18 GLU.6 GLY.31 HIS.3 LEU.14 ARG.15 ASP.17 ALA.34 VAL.27 ASN.16 TYR.11 MET.3
3wu2U TOT.96 # GLN.3 ASP.4 SER.1 VAL.9 LYS.6 PRO.3 THR.7 PHE.2 ASN.9 HIS.1 GLY.7 ILE.6 LEU.12 ARG.4 ALA.6 GLU.10 TYR.6
4qncA TOT.80 # GLN.2 ILE.8 SER.2 VAL.11 GLY.3 PRO.2 LYS.2 THR.7 PHE.7 GLU.2 MET.4 ASP.2 LEU.12 ARG.4 TRP.1 ALA.3 ASN.3 TYR.5
3ii6X TOT.256 # CYS.8 ILE.19 SER.20 GLN.7 LYS.19 ASN.12 PRO.10 THR.11 PHE.15 ALA.13 HIS.7 GLY.11 ASP.16 LEU.18 ARG.13 TRP.4 VAL.17 GLU.21 TYR.10 MET.5
3jxfA TOT.268 # CYS.5 ILE.14 SER.26 GLN.14 LYS.21 PRO.8 ASP.15 THR.17 PHE.17 ALA.9 GLY.17 HIS.3 GLU.18 LEU.22 ARG.6 TRP.5 VAL.17 ASN.17 TYR.11 MET.6
1f6bA TOT.176 # CYS.2 HIS.3 GLN.4 VAL.9 LYS.11 ILE.9 PRO.6 GLY.16 THR.13 PHE.8 ALA.8 MET.6 ASP.10 GLU.14 LEU.26 ARG.9 TRP.2 ASN.6 TYR.5 SER.9
1xrkA TOT.118 # CYS.1 GLN.4 ASP.10 SER.6 VAL.19 LYS.1 ILE.2 PRO.5 THR.7 PHE.8 GLU.10 GLY.6 HIS.1 LEU.7 ARG.7 TRP.5 ALA.14 ASN.3 TYR.1 MET.1
3ucsC TOT.74 # GLN.3 HIS.2 SER.3 VAL.4 LYS.7 ILE.2 PRO.3 GLY.2 THR.3 PHE.1 GLU.8 MET.2 ASP.7 LEU.4 ARG.7 TRP.2 ALA.8 ASN.1 TYR.5
3ucsA TOT.99 # CYS.1 ASP.5 SER.2 GLN.4 MET.1 ASN.3 PRO.3 THR.11 PHE.3 ALA.9 HIS.3 GLY.4 ILE.5 LEU.16 ARG.9 TRP.2 VAL.8 GLU.10
3pxxA TOT.279 # CYS.3 GLN.11 ILE.12 SER.16 VAL.26 LYS.7 ASN.9 PRO.16 THR.14 PHE.9 ALA.44 HIS.5 GLY.23 ASP.18 LEU.24 ARG.13 GLU.14 TYR.9 MET.6
4fn6A TOT.224 # CYS.1 ASP.14 ASN.10 GLN.12 LYS.16 ILE.18 PRO.6 GLY.6 THR.6 PHE.13 ALA.20 MET.12 HIS.7 LEU.19 ARG.6 TRP.3 VAL.9 GLU.22 TYR.12 SER.12
2vg0A TOT.227 # CYS.3 GLN.4 ASP.14 SER.14 VAL.19 MET.3 PRO.8 LYS.2 THR.10 PHE.5 ALA.27 HIS.6 GLY.17 ILE.11 GLU.21 LEU.23 ARG.20 TRP.6 ASN.6 TYR.8
1maiA TOT.119 # CYS.2 ASP.10 SER.10 GLN.10 LYS.9 ILE.8 PRO.5 THR.3 PHE.5 ALA.5 GLY.5 HIS.3 ASN.1 LEU.12 ARG.11 TRP.3 VAL.5 GLU.9 TYR.1 MET.2
1zd9A TOT.166 # CYS.4 ILE.15 SER.10 GLN.9 GLY.11 THR.7 PRO.5 LYS.14 HIS.2 PHE.4 GLU.13 MET.6 ASP.10 LEU.16 ARG.7 TRP.3 ALA.7 VAL.10 ASN.9 TYR.4
3e2oA TOT.290 # CYS.1 GLN.9 ASP.24 SER.15 VAL.14 LYS.23 ASN.19 PRO.15 THR.14 PHE.18 ALA.17 HIS.6 GLY.24 ILE.9 LEU.25 ARG.11 TRP.7 GLU.20 TYR.14 MET.5
1nlwA TOT.72 # GLN.4 HIS.6 SER.5 VAL.2 LYS.9 ILE.2 PRO.1 THR.4 ALA.3 GLY.2 ASP.3 GLU.6 LEU.13 ARG.9 ASN.2 MET.1
3l1eA TOT.105 # CYS.1 GLN.3 HIS.6 SER.14 VAL.9 LYS.5 ILE.6 PRO.5 THR.2 PHE.6 ALA.4 GLY.7 ASP.10 GLU.7 LEU.6 ARG.9 ASN.2 TYR.2 MET.1
3pu5A TOT.312 # CYS.2 GLN.7 ILE.14 SER.25 VAL.28 LYS.27 ASN.11 PRO.14 THR.12 PHE.16 ALA.30 HIS.5 GLY.31 ASP.18 LEU.24 ARG.11 TRP.5 GLU.20 TYR.12
1me8A TOT.356 # CYS.6 MET.8 ILE.31 ASN.15 GLN.12 LYS.23 PRO.10 THR.14 PHE.13 ALA.30 HIS.5 GLY.37 ASP.17 LEU.21 ARG.15 TRP.4 VAL.30 GLU.23 TYR.14 SER.28
2ql2B TOT.49 # CYS.1 ILE.3 SER.3 VAL.2 LYS.4 PRO.1 THR.1 GLU.3 HIS.1 GLY.1 ASP.1 LEU.8 ARG.5 TRP.1 ALA.6 ASN.5 TYR.2 MET.1
2c3gA TOT.98 # GLN.2 ASP.9 SER.4 VAL.4 MET.2 ILE.2 PRO.9 LYS.4 THR.7 PHE.5 ALA.2 GLY.12 HIS.5 ASN.2 LEU.4 ARG.4 TRP.6 GLU.9 TYR.6
3qm1A TOT.249 # CYS.2 GLN.11 ILE.16 SER.11 VAL.16 MET.4 ASN.17 PRO.10 LYS.10 THR.17 PHE.12 ALA.19 HIS.8 GLY.19 ASP.19 LEU.27 ARG.9 GLU.11 TYR.11
2qyvA TOT.448 # CYS.6 ASP.21 SER.25 GLN.18 LYS.21 ASN.26 PRO.24 THR.25 PHE.13 ALA.33 HIS.13 GLY.34 ILE.37 LEU.48 ARG.16 TRP.7 VAL.37 GLU.34 TYR.10
3fy3A TOT.234 # CYS.2 GLN.14 ASP.8 SER.23 VAL.15 LYS.6 PRO.9 THR.12 PHE.11 ALA.17 HIS.4 GLY.28 ILE.16 GLU.8 LEU.23 ARG.6 ASN.27 TYR.4 MET.1
2ycbA TOT.634 # CYS.6 HIS.22 SER.33 GLN.16 MET.16 ILE.62 PRO.31 LYS.40 THR.35 PHE.15 ASN.26 GLY.42 ASP.39 LEU.54 ARG.48 TRP.5 ALA.28 VAL.39 GLU.51 TYR.26
1cr5A TOT.178 # CYS.2 GLN.12 ILE.17 SER.12 VAL.9 MET.1 THR.11 PRO.7 LYS.9 HIS.3 PHE.15 ALA.11 GLY.12 ASP.12 GLU.5 LEU.11 ARG.7 TRP.2 ASN.14 TYR.6
2e1zA TOT.376 # CYS.4 GLN.8 ASP.22 SER.29 VAL.29 LYS.7 PRO.11 GLY.35 THR.16 PHE.11 GLU.21 HIS.17 MET.9 ILE.31 LEU.41 ARG.22 TRP.3 ALA.37 ASN.15 TYR.8
2e8bA TOT.183 # CYS.1 ILE.9 SER.10 VAL.19 LYS.26 PRO.4 GLY.10 THR.9 PHE.8 ASN.7 HIS.2 MET.2 ASP.6 LEU.22 ARG.6 TRP.1 ALA.9 GLU.22 TYR.10
4nmwA TOT.247 # CYS.4 ASP.10 GLN.14 VAL.17 LYS.8 ILE.9 PRO.14 THR.15 PHE.9 ALA.23 GLY.21 HIS.9 GLU.14 LEU.36 ARG.11 TRP.8 ASN.6 TYR.4 SER.15
4ebyA TOT.200 # CYS.6 ILE.11 SER.23 GLN.7 MET.2 PRO.16 LYS.4 THR.9 PHE.10 GLU.7 HIS.1 GLY.12 ASP.11 LEU.17 ARG.11 ALA.11 VAL.13 ASN.19 TYR.10
1xlqA TOT.106 # CYS.5 GLN.3 HIS.2 SER.8 VAL.14 LYS.3 ILE.6 PRO.4 THR.5 PHE.1 ALA.9 GLY.8 ASP.9 GLU.7 LEU.6 ARG.5 TRP.1 ASN.4 TYR.3 MET.3
3ic8A TOT.265 # CYS.1 ASP.14 VAL.23 GLN.9 LYS.7 ILE.11 PRO.19 THR.13 PHE.18 ALA.30 GLY.20 HIS.9 ASN.4 LEU.28 ARG.14 TRP.5 GLU.15 TYR.5 SER.20
2xppB TOT.24 # ASP.3 SER.1 VAL.1 THR.1 PHE.3 GLY.3 ILE.2 LEU.2 ARG.2 GLU.3 TYR.3
2r0hA TOT.160 # CYS.1 GLN.3 ILE.14 SER.9 VAL.11 LYS.8 PRO.11 THR.8 PHE.8 GLU.11 HIS.3 GLY.12 ASP.12 LEU.14 ARG.11 ALA.3 ASN.10 TYR.8 MET.3
3myrA TOT.268 # CYS.10 ILE.12 SER.15 GLN.8 MET.6 TRP.5 PRO.22 LYS.5 THR.14 PHE.11 ALA.28 GLY.27 HIS.8 GLU.14 LEU.20 ARG.13 ASP.15 VAL.17 ASN.7 TYR.11
4ablA TOT.181 # CYS.5 MET.2 ASP.9 VAL.19 GLN.11 LYS.17 THR.5 PRO.4 HIS.2 PHE.7 ASN.10 GLY.15 ILE.17 LEU.7 ARG.4 ALA.13 GLU.11 TYR.5 SER.18
2q8rE TOT.66 # CYS.4 ILE.5 SER.5 GLN.3 LYS.6 TRP.1 PRO.5 THR.6 PHE.2 ASN.3 GLY.3 HIS.2 ARG.3 ASP.4 VAL.3 GLU.3 TYR.6 MET.2
3nqkA TOT.286 # CYS.1 ILE.22 GLN.10 VAL.21 LYS.15 ASN.16 PRO.13 THR.24 PHE.12 ALA.12 HIS.3 GLY.16 ASP.27 LEU.19 ARG.11 TRP.3 GLU.19 TYR.23 SER.19
1z2nX TOT.311 # CYS.7 GLN.15 ILE.29 SER.19 VAL.22 LYS.25 PRO.15 THR.14 PHE.16 ASN.23 HIS.10 GLY.12 ASP.17 LEU.29 ARG.8 TRP.4 ALA.11 GLU.24 TYR.5 MET.6
3mpkA TOT.235 # HIS.3 SER.17 GLN.12 MET.6 ILE.13 PRO.11 LYS.5 THR.11 PHE.9 ASN.9 GLY.11 ASP.14 LEU.25 ARG.17 TRP.2 ALA.32 VAL.20 GLU.11 TYR.7
4gqmA TOT.103 # GLN.4 ILE.4 SER.8 VAL.5 LYS.5 ASN.1 PRO.2 THR.1 PHE.5 ALA.9 GLY.6 HIS.6 LEU.16 ARG.5 ASP.7 GLU.11 TYR.3 MET.5
1wc2A TOT.180 # CYS.12 GLN.12 HIS.9 SER.14 VAL.6 MET.4 ILE.3 PRO.8 LYS.7 THR.11 PHE.4 ALA.9 GLY.26 ASP.7 GLU.6 LEU.6 ARG.5 TRP.5 ASN.17 TYR.9
4p7oA TOT.340 # ASP.27 SER.21 GLN.26 LYS.11 THR.12 PRO.19 GLY.13 HIS.8 PHE.15 ALA.33 MET.9 ILE.22 GLU.14 LEU.35 ARG.18 TRP.11 VAL.16 ASN.14 TYR.16
1aqzA TOT.142 # CYS.4 HIS.8 SER.9 GLN.6 LYS.14 ILE.5 PRO.11 THR.7 PHE.6 ASN.8 GLY.14 ASP.11 LEU.9 ARG.6 TRP.2 ALA.7 VAL.3 GLU.4 TYR.7 MET.1
4f8xA TOT.333 # CYS.7 MET.4 ASP.18 GLN.15 VAL.29 LYS.18 PRO.9 THR.23 PHE.18 ALA.39 HIS.5 GLY.23 ILE.12 GLU.20 LEU.22 ARG.11 TRP.7 ASN.17 TYR.18 SER.18
2uy1A TOT.437 # CYS.3 ASP.22 SER.30 GLN.11 LYS.31 PRO.12 GLY.28 THR.9 PHE.27 ASN.16 HIS.8 MET.18 ILE.28 LEU.54 ARG.28 TRP.5 ALA.16 VAL.16 GLU.45 TYR.30
1h8gA TOT.92 # GLN.1 ASP.9 SER.3 VAL.4 LYS.9 PRO.3 THR.8 PHE.4 ASN.4 GLY.10 ILE.3 LEU.4 ARG.1 TRP.7 ALA.8 GLU.6 TYR.8
4f3lA TOT.319 # CYS.7 ASP.15 VAL.17 GLN.13 LYS.20 ILE.17 ASN.9 GLY.13 THR.22 PHE.19 ALA.11 MET.7 HIS.13 LEU.33 ARG.14 TRP.5 PRO.13 GLU.29 TYR.16 SER.26
4f3lB TOT.302 # CYS.10 GLN.11 ASP.15 SER.26 VAL.19 LYS.23 ASN.12 PRO.8 GLY.13 THR.15 PHE.17 ALA.18 HIS.11 MET.8 ILE.17 LEU.30 ARG.23 TRP.2 GLU.14 TYR.10
3g89A TOT.238 # CYS.2 MET.2 ILE.2 VAL.21 GLN.3 LYS.10 PRO.21 ASP.4 THR.5 PHE.6 ALA.29 GLY.25 HIS.6 LEU.47 ARG.21 TRP.2 GLU.24 TYR.3 SER.5
3lrkA TOT.452 # CYS.9 GLN.14 ASP.37 SER.41 VAL.20 LYS.18 PRO.16 THR.23 PHE.17 GLU.17 HIS.7 GLY.44 ILE.21 LEU.36 ARG.17 TRP.12 ALA.32 ASN.35 TYR.24 MET.12
4e4rA TOT.325 # CYS.2 GLN.18 ASP.20 SER.23 VAL.27 LYS.25 PRO.12 THR.16 PHE.12 ALA.37 HIS.1 GLY.27 ILE.19 GLU.24 LEU.33 ARG.7 ASN.15 TYR.7
3no0A TOT.276 # MET.1 ILE.26 VAL.26 GLN.6 LYS.32 PRO.14 THR.17 PHE.8 ASN.8 HIS.2 GLY.22 ASP.10 LEU.25 ARG.15 TRP.3 ALA.13 GLU.25 TYR.5 SER.18
3k6jA TOT.430 # CYS.8 GLN.13 ILE.36 SER.30 VAL.24 GLY.29 PRO.12 LYS.32 ASP.21 THR.18 PHE.21 ALA.22 MET.16 HIS.11 GLU.33 LEU.36 ARG.18 TRP.4 ASN.31 TYR.15
2fhqA TOT.131 # CYS.2 GLN.4 ILE.7 SER.7 VAL.10 LYS.14 ASN.3 PRO.7 ASP.6 THR.11 PHE.6 ALA.9 GLY.10 HIS.3 LEU.12 ARG.1 TRP.4 GLU.12 TYR.3
2z8xA TOT.616 # ILE.30 SER.45 GLN.13 LYS.26 THR.40 PRO.16 HIS.12 PHE.32 ALA.58 GLY.88 ASP.56 GLU.13 LEU.55 ARG.13 TRP.8 VAL.43 ASN.43 TYR.20 MET.5
2ux8A TOT.254 # CYS.4 GLN.13 ILE.15 SER.4 ASN.6 VAL.22 LYS.11 PRO.16 THR.11 PHE.11 ALA.27 HIS.3 GLY.25 ASP.17 LEU.24 ARG.14 TRP.1 GLU.14 TYR.6 MET.10
2v73A TOT.179 # GLN.2 ASP.10 SER.12 VAL.9 LYS.13 PRO.2 GLY.19 THR.11 PHE.10 ALA.7 HIS.2 MET.2 ILE.15 GLU.11 LEU.16 ARG.8 ASN.22 TYR.8
2wnsA TOT.197 # CYS.4 GLN.11 ILE.15 SER.12 VAL.20 LYS.13 ASN.3 PRO.7 THR.15 PHE.6 ALA.10 HIS.2 GLY.16 ASP.11 LEU.24 ARG.10 GLU.12 TYR.4 MET.2
2pytA TOT.121 # CYS.1 GLN.3 ASP.8 SER.9 VAL.11 LYS.5 ASN.3 PRO.6 THR.9 PHE.9 ALA.8 HIS.3 GLY.15 ILE.5 LEU.8 ARG.3 TRP.4 GLU.9 TYR.2
3futA TOT.263 # HIS.5 GLN.5 VAL.23 LYS.9 TRP.2 PRO.22 THR.13 PHE.14 ALA.34 GLY.18 ILE.3 ASN.3 LEU.44 ARG.28 ASP.7 GLU.22 TYR.4 SER.7
3o0aA TOT.211 # CYS.4 THR.12 ASP.12 SER.5 GLN.2 VAL.19 LYS.19 ASN.7 PRO.11 HIS.2 PHE.10 ALA.14 GLY.17 ILE.9 LEU.16 ARG.9 TRP.4 GLU.26 TYR.9 MET.4
3lazA TOT.94 # ASP.6 GLN.2 THR.4 LYS.4 PRO.6 HIS.3 PHE.2 ASN.5 GLY.8 ILE.13 LEU.6 ARG.5 TRP.1 ALA.9 VAL.8 GLU.7 TYR.3 SER.2
4eogA TOT.455 # ASP.16 VAL.34 GLN.7 LYS.41 PRO.21 THR.17 PHE.20 ASN.25 HIS.4 GLY.24 ILE.36 LEU.48 ARG.26 TRP.7 ALA.23 GLU.55 TYR.31 SER.20
3nkqA TOT.766 # CYS.31 GLN.18 ILE.33 SER.55 VAL.47 LYS.38 PRO.55 THR.48 PHE.36 GLU.44 HIS.27 GLY.48 ASP.48 LEU.63 ARG.42 TRP.12 ALA.24 ASN.38 TYR.42 MET.17
1uanA TOT.220 # CYS.1 GLN.4 HIS.5 SER.9 VAL.17 LYS.8 TRP.3 PRO.18 THR.6 PHE.11 ALA.27 GLY.21 ILE.4 ASN.3 LEU.27 ARG.20 ASP.11 GLU.16 TYR.6 MET.3
3jteA TOT.126 # CYS.1 ILE.17 SER.7 GLN.2 LYS.10 PRO.3 GLY.6 THR.8 PHE.3 ASN.8 HIS.2 MET.6 ASP.9 LEU.16 ARG.4 ALA.9 VAL.6 GLU.8 TYR.1
4wpeA TOT.250 # CYS.4 ILE.15 SER.22 GLN.18 LYS.18 PRO.1 THR.14 PHE.13 ASN.17 HIS.6 GLY.12 ASP.13 LEU.27 ARG.12 TRP.4 ALA.17 VAL.8 GLU.20 TYR.9
2giaA TOT.154 # CYS.1 GLN.6 ASP.7 SER.7 VAL.14 LYS.3 ILE.1 PRO.8 GLY.4 THR.14 PHE.9 ALA.15 MET.3 HIS.6 GLU.11 LEU.15 ARG.17 TRP.3 ASN.5 TYR.5
2giaB TOT.146 # CYS.1 ASP.13 ASN.2 GLN.6 MET.3 ILE.3 PRO.7 LYS.8 THR.5 PHE.8 ALA.10 GLY.7 HIS.9 LEU.14 ARG.13 TRP.1 VAL.13 GLU.9 TYR.5 SER.9
2wtbA TOT.635 # CYS.9 ASP.29 SER.39 GLN.16 LYS.35 ASN.17 PRO.35 THR.30 PHE.30 ALA.63 GLY.59 HIS.8 ILE.52 LEU.62 ARG.29 TRP.4 VAL.53 GLU.33 TYR.13 MET.19
3s5sA TOT.366 # CYS.2 GLN.5 ASP.19 ASN.6 VAL.25 MET.7 PRO.15 LYS.6 THR.20 PHE.13 ALA.76 HIS.4 GLY.45 ILE.16 LEU.37 ARG.27 TRP.3 GLU.24 TYR.1 SER.15
4f9zA TOT.219 # CYS.2 GLN.10 ASP.12 SER.14 VAL.17 LYS.11 ASN.11 PRO.9 THR.13 PHE.14 ALA.13 HIS.6 GLY.10 ILE.19 LEU.23 ARG.3 TRP.2 GLU.19 TYR.5 MET.6
4qpiA TOT.263 # CYS.2 ASP.15 VAL.16 GLN.8 MET.7 ILE.13 PRO.17 LYS.8 THR.27 PHE.16 ALA.14 GLY.18 HIS.5 ASN.12 LEU.22 ARG.10 TRP.4 GLU.12 TYR.11 SER.26
4duqA TOT.88 # GLN.5 HIS.2 SER.10 VAL.7 LYS.9 ILE.1 PRO.1 THR.3 PHE.6 ALA.4 GLY.5 ASP.6 ASN.2 LEU.12 GLU.10 TYR.2 MET.3
3dcfA TOT.178 # GLN.2 ASP.11 SER.6 VAL.10 LYS.5 PRO.7 THR.14 PHE.6 ASN.6 HIS.3 GLY.10 ILE.13 LEU.19 ARG.16 TRP.2 ALA.19 GLU.18 TYR.11
4bkjA TOT.279 # CYS.8 GLN.12 ILE.12 SER.13 VAL.20 LYS.6 PRO.17 THR.11 PHE.16 ALA.20 HIS.6 GLY.16 ASP.18 GLU.13 LEU.37 ARG.19 TRP.5 ASN.12 TYR.8 MET.10
4h2dA TOT.158 # CYS.4 GLN.8 ASP.12 SER.7 VAL.12 LYS.5 THR.5 PRO.13 HIS.2 PHE.8 ALA.11 GLY.13 ILE.3 GLU.4 LEU.24 ARG.13 TRP.3 ASN.6 TYR.3 MET.2
4e2xA TOT.405 # CYS.8 HIS.13 SER.20 GLN.15 MET.8 ILE.15 PRO.22 LYS.9 THR.22 PHE.23 ALA.41 GLY.31 ASP.27 GLU.30 LEU.34 ARG.31 TRP.2 VAL.35 ASN.7 TYR.12
3kdwA TOT.191 # GLN.5 ILE.10 SER.5 VAL.15 LYS.14 PRO.3 THR.12 PHE.6 GLU.17 HIS.2 GLY.10 ASP.16 LEU.15 ARG.13 TRP.2 ALA.28 ASN.6 TYR.12
3oziA TOT.170 # CYS.2 ASP.16 SER.10 GLN.8 LYS.17 ASN.4 PRO.6 THR.5 PHE.8 ALA.9 HIS.5 GLY.10 ILE.15 LEU.12 ARG.12 TRP.4 VAL.8 GLU.10 TYR.7 MET.2
4cgwA TOT.104 # CYS.2 ASP.5 SER.3 GLN.5 VAL.1 LYS.8 ASN.5 PRO.1 THR.5 PHE.5 ALA.16 GLY.9 ILE.6 LEU.10 ARG.7 GLU.10 TYR.5 MET.1
3bruA TOT.188 # CYS.2 GLN.6 ASP.12 SER.8 VAL.6 LYS.5 PRO.6 THR.7 PHE.13 ASN.2 HIS.7 GLY.17 ILE.6 LEU.26 ARG.18 TRP.3 ALA.26 GLU.13 TYR.5
2qhqA TOT.111 # CYS.2 ILE.5 SER.4 GLN.5 PRO.3 THR.9 PHE.11 ALA.12 HIS.2 GLY.8 ASP.7 GLU.11 LEU.11 ARG.3 TRP.1 VAL.3 ASN.12 TYR.2
4fojA TOT.253 # CYS.1 ILE.12 SER.14 GLN.17 GLY.18 ASN.6 PRO.11 LYS.5 THR.9 PHE.15 ALA.25 HIS.7 MET.8 ASP.14 LEU.27 ARG.19 TRP.3 VAL.16 GLU.21 TYR.5
2oasA TOT.419 # CYS.7 GLN.18 ILE.33 ASN.12 VAL.32 LYS.15 TRP.2 PRO.19 THR.22 PHE.14 ALA.42 GLY.41 HIS.17 LEU.45 ARG.20 ASP.24 GLU.16 TYR.8 SER.32
2vp4A TOT.198 # CYS.4 ASP.6 SER.11 GLN.9 LYS.14 PRO.8 THR.12 PHE.6 GLU.20 HIS.6 GLY.7 ILE.11 LEU.22 ARG.12 TRP.4 ALA.8 VAL.11 ASN.10 TYR.11 MET.6
4akxB TOT.521 # GLN.30 ILE.23 SER.44 VAL.34 LYS.18 ASN.19 PRO.27 THR.27 PHE.15 ALA.61 HIS.9 GLY.34 ASP.29 LEU.67 ARG.38 TRP.2 GLU.40 TYR.4
3ftjA TOT.214 # MET.2 ILE.19 VAL.16 GLN.10 LYS.17 ASN.18 PRO.4 THR.18 PHE.9 ALA.6 HIS.2 GLY.18 ASP.12 LEU.18 ARG.8 GLU.9 TYR.5 SER.23
2pmvA TOT.370 # CYS.6 GLN.16 HIS.5 SER.36 VAL.24 MET.13 ILE.26 PRO.20 LYS.21 THR.26 PHE.11 ALA.28 GLY.20 ASP.12 GLU.18 LEU.38 ARG.6 TRP.4 ASN.28 TYR.12
2q7dA TOT.337 # CYS.5 ILE.25 SER.23 GLN.15 LYS.17 PRO.14 GLY.17 THR.16 PHE.18 ASN.17 HIS.15 MET.7 ASP.18 LEU.34 ARG.17 TRP.1 ALA.19 VAL.26 GLU.26 TYR.7
2uu7A TOT.370 # CYS.10 ILE.19 SER.20 GLN.12 GLY.36 THR.19 PRO.23 LYS.21 HIS.11 PHE.19 GLU.27 MET.11 ASP.20 LEU.19 ARG.22 TRP.7 ALA.24 VAL.16 ASN.19 TYR.15
2oqrA TOT.226 # CYS.1 MET.6 GLN.2 ILE.9 ASN.3 VAL.27 LYS.9 THR.12 PRO.9 HIS.3 PHE.4 ALA.18 GLY.18 ASP.23 LEU.28 ARG.19 TRP.1 GLU.16 TYR.5 SER.13
3cg1A TOT.293 # CYS.1 MET.3 ASP.16 GLN.8 VAL.23 LYS.23 ASN.14 PRO.12 THR.15 PHE.16 ALA.15 HIS.3 GLY.18 ILE.27 LEU.25 ARG.11 TRP.1 GLU.25 TYR.17 SER.20
1tvdA TOT.111 # CYS.2 ASP.9 VAL.11 GLN.4 LYS.5 PRO.8 THR.11 PHE.8 ASN.1 HIS.2 GLY.6 ILE.4 LEU.7 ARG.6 TRP.1 ALA.4 GLU.4 TYR.7 SER.11
4cybA TOT.171 # CYS.2 ILE.5 SER.4 GLN.8 VAL.16 LYS.5 ASN.3 PRO.7 ASP.12 THR.15 PHE.4 ALA.13 GLY.9 HIS.9 LEU.25 ARG.10 TRP.2 GLU.14 TYR.5 MET.3
4a8tA TOT.302 # CYS.8 ILE.13 SER.17 GLN.10 LYS.13 TRP.1 PRO.9 GLY.24 THR.20 PHE.12 ALA.17 MET.14 HIS.10 GLU.25 LEU.30 ARG.11 ASP.18 VAL.23 ASN.14 TYR.13
3f7jA TOT.276 # CYS.1 GLN.13 ILE.19 SER.11 VAL.18 LYS.25 PRO.9 THR.11 PHE.9 ALA.16 HIS.8 GLY.18 ASP.19 GLU.28 LEU.29 ARG.10 TRP.6 ASN.13 TYR.8 MET.5
2ag5A TOT.238 # CYS.6 ILE.17 SER.14 GLN.10 LYS.11 PRO.6 THR.13 PHE.9 GLU.14 HIS.2 GLY.19 ASP.13 LEU.19 ARG.12 TRP.2 ALA.26 VAL.22 ASN.12 TYR.5 MET.6
3dytA TOT.341 # CYS.6 GLN.17 ASP.17 SER.21 VAL.22 LYS.31 ASN.10 PRO.16 THR.19 PHE.16 ALA.20 HIS.9 GLY.19 ILE.21 LEU.28 ARG.17 TRP.5 GLU.31 TYR.16
1agqA TOT.91 # CYS.7 GLN.1 ILE.5 SER.7 VAL.5 LYS.5 ASN.3 PRO.1 THR.4 PHE.3 ALA.6 GLY.6 HIS.3 LEU.11 ARG.7 ASP.7 GLU.5 TYR.4 MET.1
3ew1A TOT.134 # CYS.2 MET.1 ILE.6 VAL.8 GLN.10 LYS.3 PRO.4 THR.12 PHE.7 ALA.9 GLY.15 ASP.4 GLU.5 LEU.4 ARG.2 TRP.4 ASN.15 TYR.5 SER.18
3gdeA TOT.551 # CYS.3 ASP.28 GLN.11 VAL.49 LYS.43 ASN.8 PRO.19 GLY.37 THR.23 PHE.21 ALA.37 HIS.8 MET.18 ILE.35 LEU.57 ARG.42 TRP.6 GLU.64 TYR.16 SER.26
4k55A TOT.118 # CYS.2 HIS.4 VAL.10 GLN.4 LYS.6 ILE.4 PRO.5 GLY.9 THR.5 PHE.4 ALA.10 MET.3 ASP.8 ASN.2 LEU.12 ARG.6 TRP.1 GLU.8 TYR.5 SER.10
1semA TOT.57 # CYS.1 ASP.4 GLN.3 VAL.3 LYS.2 PRO.4 THR.2 PHE.5 ASN.7 GLY.4 ILE.3 LEU.4 ARG.3 TRP.2 ALA.2 GLU.4 TYR.2 SER.2
4af8A TOT.331 # CYS.11 GLN.21 ASP.27 SER.23 VAL.23 LYS.15 ASN.9 PRO.16 THR.18 PHE.12 ALA.25 HIS.7 GLY.29 ILE.16 LEU.32 ARG.17 TRP.3 GLU.8 TYR.9 MET.10
4ashA TOT.172 # CYS.2 GLN.4 ASP.4 SER.11 VAL.22 LYS.8 ASN.2 PRO.9 THR.14 PHE.8 ALA.18 HIS.5 GLY.22 ILE.9 LEU.10 ARG.5 TRP.4 GLU.7 TYR.4 MET.4
1dd9A TOT.310 # CYS.2 GLN.18 ASP.21 ASN.14 VAL.16 GLY.26 PRO.16 LYS.8 THR.15 PHE.14 ALA.25 HIS.3 MET.9 ILE.12 LEU.38 ARG.27 TRP.2 GLU.17 TYR.13 SER.14
1vljA TOT.380 # CYS.1 GLN.5 ASP.17 SER.20 VAL.36 LYS.28 PRO.15 THR.14 PHE.14 ASN.15 HIS.10 GLY.37 ILE.34 LEU.28 ARG.13 TRP.6 ALA.37 GLU.29 TYR.13 MET.8
4xfeA TOT.291 # HIS.6 ASN.14 GLN.15 LYS.23 ILE.20 PRO.13 THR.15 PHE.13 ALA.28 GLY.24 ASP.18 LEU.22 ARG.10 TRP.3 VAL.25 GLU.21 TYR.8 SER.13
4p15A TOT.137 # MET.1 GLN.8 ILE.8 ASN.6 VAL.9 LYS.9 PRO.2 THR.4 PHE.1 ALA.11 GLY.16 HIS.6 LEU.22 ARG.9 ASP.2 GLU.13 TYR.2 SER.8
3mbrX TOT.236 # HIS.6 SER.10 GLN.6 MET.2 ILE.10 PRO.15 LYS.6 THR.19 PHE.7 ALA.18 GLY.19 ASP.18 GLU.12 LEU.27 ARG.20 TRP.7 VAL.18 ASN.7 TYR.9
3qhqA TOT.215 # CYS.3 GLN.6 ASP.13 SER.10 VAL.18 LYS.18 ILE.20 PRO.6 GLY.5 THR.11 PHE.10 ASN.10 MET.4 HIS.4 LEU.34 ARG.2 ALA.8 GLU.21 TYR.12
4q20A TOT.225 # CYS.2 MET.2 ILE.8 VAL.19 GLN.8 LYS.4 ASN.5 PRO.7 THR.12 PHE.5 ALA.28 HIS.6 GLY.23 ASP.15 LEU.31 ARG.19 TRP.1 GLU.18 TYR.2 SER.10
1su8A TOT.633 # CYS.19 MET.17 ASP.33 ASN.27 GLN.17 LYS.34 PRO.30 THR.41 PHE.11 ALA.79 HIS.19 GLY.58 ILE.43 LEU.60 ARG.25 TRP.4 VAL.55 GLU.31 TYR.5 SER.25
1g7sA TOT.544 # CYS.1 GLN.18 ILE.59 SER.26 VAL.49 MET.17 ASN.9 PRO.23 LYS.32 THR.29 PHE.16 ALA.39 HIS.10 GLY.42 ASP.42 LEU.45 ARG.29 TRP.3 GLU.43 TYR.12
2iwnA TOT.90 # GLN.6 ILE.9 SER.7 VAL.9 LYS.2 PRO.1 THR.10 PHE.3 GLU.5 HIS.2 GLY.11 ASP.4 LEU.7 ARG.4 ALA.4 ASN.3 TYR.1 MET.2
3grlA TOT.601 # CYS.15 GLN.42 ASP.22 SER.46 VAL.41 LYS.29 PRO.22 GLY.34 THR.32 PHE.23 ALA.35 HIS.9 MET.12 ILE.40 GLU.38 LEU.85 ARG.22 TRP.5 ASN.37 TYR.12
1s35A TOT.211 # CYS.1 ILE.8 SER.14 GLN.19 GLY.13 ASN.8 PRO.6 LYS.14 HIS.5 THR.5 ALA.18 MET.3 ASP.18 LEU.25 ARG.9 TRP.3 VAL.8 GLU.24 TYR.4 PHE.6
1wv9A TOT.86 # CYS.1 ILE.1 VAL.8 GLN.3 LYS.4 PRO.8 ASP.1 THR.1 PHE.1 ALA.9 GLY.7 HIS.1 LEU.17 ARG.6 TRP.1 GLU.12 TYR.2 SER.3
4kamA TOT.374 # GLN.12 ILE.21 SER.23 VAL.31 LYS.11 PRO.20 THR.22 PHE.19 ALA.49 HIS.12 GLY.36 ASP.20 GLU.18 LEU.38 ARG.16 TRP.4 ASN.13 TYR.9
3f9tA TOT.380 # CYS.8 GLN.3 HIS.8 SER.14 VAL.25 LYS.35 ILE.41 PRO.13 THR.16 PHE.14 GLU.33 GLY.31 ASP.26 LEU.36 ARG.18 TRP.1 ALA.18 ASN.21 TYR.19
1ynaA TOT.193 # CYS.2 GLN.7 ASP.12 SER.13 VAL.13 LYS.3 PRO.6 THR.18 PHE.5 ALA.13 HIS.4 GLY.29 ILE.7 GLU.8 LEU.8 ARG.8 TRP.8 ASN.12 TYR.17
3suuA TOT.504 # CYS.2 GLN.19 ILE.31 ASN.27 VAL.35 GLY.45 PRO.24 LYS.27 THR.36 PHE.16 ALA.39 HIS.13 MET.9 ASP.30 LEU.34 ARG.17 TRP.10 GLU.24 TYR.25 SER.41
4j20A TOT.88 # CYS.2 GLN.3 ILE.2 SER.5 VAL.5 GLY.12 PRO.3 LYS.11 THR.7 ALA.16 HIS.1 MET.6 ASP.4 LEU.2 ARG.1 TRP.1 ASN.3 TYR.4
1azoA TOT.212 # CYS.1 GLN.10 ASP.6 SER.9 VAL.14 LYS.7 ILE.11 PRO.15 THR.13 PHE.5 GLU.22 GLY.17 HIS.4 LEU.34 ARG.16 TRP.6 ALA.15 ASN.4 TYR.3
1pyfA TOT.309 # GLN.7 ASP.22 SER.12 VAL.18 LYS.27 PRO.14 HIS.8 THR.14 ALA.21 GLY.21 ILE.23 GLU.28 LEU.31 ARG.14 TRP.1 ASN.21 TYR.10 PHE.17
3g46A TOT.146 # CYS.1 MET.3 ILE.8 VAL.13 GLN.6 LYS.15 PRO.3 THR.6 PHE.6 ASN.9 HIS.2 GLY.10 ASP.13 LEU.13 ARG.4 TRP.2 ALA.18 GLU.3 TYR.4 SER.7
4inaA TOT.380 # CYS.9 ASP.20 SER.16 GLN.12 LYS.27 THR.17 PRO.17 HIS.10 PHE.13 GLU.36 GLY.31 ILE.29 LEU.32 ARG.14 TRP.6 ALA.27 VAL.27 ASN.18 TYR.19
1ltlA TOT.238 # CYS.4 GLN.9 ILE.17 SER.12 VAL.19 LYS.14 ASN.9 PRO.9 HIS.2 PHE.14 ALA.8 GLY.11 ASP.21 LEU.24 ARG.22 THR.15 GLU.20 TYR.5 MET.3
2xmeA TOT.201 # CYS.2 ILE.17 SER.7 GLN.2 LYS.16 ASN.3 PRO.7 HIS.5 PHE.10 ALA.13 GLY.15 ASP.19 LEU.17 ARG.15 TRP.1 THR.6 VAL.21 GLU.16 TYR.5 MET.4
3c70A TOT.256 # CYS.5 ASP.14 SER.8 GLN.7 LYS.23 ASN.6 PRO.12 THR.17 PHE.13 ALA.18 HIS.8 GLY.17 ILE.17 LEU.30 ARG.4 TRP.5 VAL.14 GLU.24 TYR.12 MET.2
3eujB TOT.90 # MET.1 ASP.8 GLN.13 VAL.9 LYS.2 PRO.4 THR.3 PHE.3 ALA.13 HIS.4 GLY.2 ILE.7 GLU.2 LEU.6 ARG.4 TRP.1 ASN.2 TYR.3 SER.3
2y4iB TOT.260 # CYS.4 ASP.15 GLN.13 VAL.14 LYS.19 PRO.10 GLY.18 THR.10 PHE.14 GLU.19 HIS.9 MET.8 ILE.23 LEU.27 ARG.13 TRP.7 ALA.14 ASN.6 TYR.6 SER.11
3mddA TOT.385 # CYS.5 ILE.29 SER.11 VAL.18 GLN.19 LYS.25 ASN.12 PRO.15 THR.24 PHE.15 ALA.45 HIS.3 GLY.39 ASP.16 LEU.27 ARG.21 TRP.4 GLU.31 TYR.17 MET.9
1gl2B TOT.58 # ASP.5 SER.5 GLN.6 LYS.1 ILE.7 PHE.1 ALA.5 GLY.2 HIS.3 GLU.8 LEU.3 ARG.2 VAL.4 ASN.3 MET.3
1gl2D TOT.52 # GLN.4 ILE.5 SER.3 VAL.2 MET.1 ASN.4 LYS.2 THR.3 ALA.4 GLY.3 ASP.5 LEU.6 ARG.3 GLU.7
1l7dA TOT.351 # CYS.3 GLN.9 ILE.22 SER.15 VAL.42 GLY.28 ASN.6 PRO.19 LYS.23 ASP.15 THR.26 PHE.7 ALA.49 MET.13 HIS.5 LEU.28 ARG.15 TRP.1 GLU.22 TYR.3
1yi9A TOT.295 # CYS.10 ILE.15 SER.15 GLN.7 MET.15 PRO.23 LYS.11 THR.19 PHE.15 GLU.11 HIS.10 GLY.21 ASP.17 LEU.18 ARG.14 TRP.3 ALA.20 VAL.26 ASN.10 TYR.15
4h09A TOT.361 # CYS.6 ILE.30 SER.34 GLN.4 LYS.28 ASN.24 PRO.12 THR.42 PHE.15 ALA.23 GLY.30 ASP.17 LEU.24 ARG.4 TRP.2 VAL.28 GLU.16 TYR.22
3oceA TOT.456 # CYS.4 ASP.20 GLN.21 VAL.36 MET.12 ILE.31 PRO.19 LYS.11 THR.24 PHE.13 ALA.63 GLY.31 HIS.5 GLU.29 LEU.49 ARG.28 TRP.1 ASN.22 TYR.9 SER.28
2gblA TOT.504 # CYS.3 GLN.17 ILE.47 SER.40 VAL.33 LYS.22 PRO.13 THR.30 PHE.28 ALA.32 HIS.8 GLY.42 ASP.27 GLU.41 LEU.37 ARG.40 TRP.3 ASN.17 TYR.12 MET.12
4qfuA TOT.446 # CYS.2 GLN.18 ILE.28 SER.25 VAL.24 LYS.30 ASN.29 PRO.19 THR.17 PHE.20 ALA.28 HIS.10 GLY.41 ASP.34 LEU.25 ARG.24 TRP.18 GLU.25 TYR.29
2ot3A TOT.231 # CYS.8 ASP.16 SER.13 GLN.12 GLY.7 PRO.13 LYS.17 THR.15 PHE.12 ALA.12 HIS.1 MET.9 ILE.21 GLU.13 LEU.18 ARG.11 TRP.1 VAL.13 ASN.9 TYR.10
2j8xA TOT.230 # CYS.5 ILE.10 SER.16 GLN.11 LYS.12 ASN.10 PRO.14 GLY.15 THR.7 PHE.11 ALA.21 MET.3 HIS.8 LEU.32 ARG.11 TRP.7 ASP.12 VAL.13 GLU.8 TYR.4
2fbdA TOT.122 # CYS.8 GLN.5 ASP.4 SER.16 VAL.4 LYS.5 ILE.6 PRO.5 THR.9 PHE.4 GLU.5 GLY.7 HIS.2 LEU.7 ARG.5 TRP.5 ALA.6 ASN.11 TYR.7 MET.1
1qwzA TOT.235 # CYS.1 ASP.18 SER.15 GLN.13 LYS.23 ILE.14 PRO.2 GLY.10 THR.14 PHE.11 ASN.15 MET.6 HIS.19 LEU.16 ARG.10 TRP.1 ALA.6 VAL.14 GLU.15 TYR.12
3giuA TOT.209 # CYS.1 GLN.9 ASP.16 SER.9 VAL.11 LYS.9 PRO.15 THR.14 PHE.8 GLU.8 HIS.10 GLY.14 ILE.22 LEU.19 ARG.4 TRP.1 ALA.19 ASN.14 TYR.6
4bg7A TOT.97 # GLN.7 ASP.4 SER.7 VAL.6 GLY.5 PRO.2 LYS.4 THR.6 PHE.6 GLU.13 HIS.2 MET.1 ILE.5 LEU.10 ARG.4 TRP.3 ALA.3 ASN.4 TYR.5
1h30A TOT.391 # CYS.8 ILE.13 SER.22 GLN.13 MET.8 ASN.9 PRO.21 LYS.12 ASP.22 THR.21 PHE.15 ALA.33 GLY.28 HIS.12 LEU.46 ARG.29 TRP.6 VAL.42 GLU.22 TYR.9
1earA TOT.142 # CYS.1 GLN.4 ASP.12 SER.5 VAL.10 LYS.14 PRO.2 THR.9 PHE.3 ALA.3 HIS.3 GLY.7 ILE.15 GLU.17 LEU.12 ARG.8 TRP.2 ASN.4 TYR.6 MET.5
3d3bJ TOT.87 # ASP.6 SER.3 GLN.5 LYS.3 PRO.5 HIS.2 PHE.1 THR.7 GLY.6 ILE.7 GLU.4 LEU.10 ARG.10 ALA.8 VAL.7 ASN.1 MET.2
3zibA TOT.92 # CYS.2 GLN.3 ILE.4 SER.6 VAL.4 MET.2 ASN.2 PRO.3 LYS.8 THR.5 PHE.2 ALA.15 HIS.2 GLY.4 ASP.4 LEU.7 ARG.2 GLU.9 TYR.8
3d3bA TOT.139 # CYS.1 GLN.6 ASP.9 SER.7 VAL.13 LYS.10 ILE.5 PRO.5 THR.2 PHE.4 ALA.18 GLY.5 HIS.1 GLU.12 LEU.17 ARG.9 TRP.1 ASN.5 TYR.7 MET.2
1zkiA TOT.120 # CYS.3 HIS.4 GLN.5 VAL.15 LYS.3 ILE.3 PRO.3 THR.3 PHE.3 ALA.14 GLY.14 ASP.6 GLU.7 LEU.13 ARG.11 ASN.2 TYR.2 SER.9
1rljA TOT.135 # MET.3 ASP.7 GLN.10 VAL.15 LYS.10 ILE.5 PRO.3 THR.11 PHE.10 GLU.7 GLY.7 HIS.3 LEU.9 ARG.4 TRP.1 ALA.8 ASN.7 TYR.4 SER.11
2j3tC TOT.141 # CYS.2 GLN.4 ILE.5 SER.13 VAL.12 LYS.9 THR.6 PRO.7 HIS.6 PHE.9 ALA.3 GLY.8 ASP.6 ASN.4 LEU.16 ARG.8 TRP.1 GLU.7 TYR.10 MET.5
1wwwV TOT.108 # CYS.6 GLN.2 ASP.7 SER.9 VAL.11 LYS.9 PRO.1 GLY.7 THR.10 PHE.7 ASN.4 HIS.4 MET.2 ILE.6 LEU.3 ARG.6 TRP.3 ALA.5 GLU.4 TYR.2
4rxtA TOT.295 # GLN.10 ASP.21 SER.15 VAL.26 LYS.27 ASN.12 PRO.11 THR.21 PHE.8 ALA.38 GLY.31 ILE.25 LEU.20 ARG.5 TRP.1 GLU.13 TYR.5 MET.6
1svtO TOT.97 # ILE.10 SER.6 VAL.13 LYS.8 ASN.5 PRO.2 THR.3 PHE.1 ALA.7 HIS.1 GLY.10 ASP.6 LEU.7 ARG.5 GLU.10 TYR.1 MET.2
3ekgA TOT.380 # CYS.5 ASP.22 GLN.13 VAL.26 LYS.12 PRO.23 THR.19 PHE.14 GLU.27 HIS.14 GLY.42 ILE.16 LEU.40 ARG.27 TRP.9 ALA.29 ASN.11 TYR.15 SER.16
3e3rA TOT.183 # CYS.1 ASP.19 SER.15 GLN.7 LYS.6 ILE.1 PRO.4 THR.7 PHE.9 ALA.20 GLY.14 HIS.1 ASN.3 LEU.18 ARG.18 TRP.3 VAL.14 GLU.14 TYR.3 MET.6
3nh6A TOT.273 # CYS.3 GLN.15 HIS.6 SER.16 VAL.21 MET.6 ASN.8 PRO.7 LYS.9 THR.16 PHE.10 ALA.27 GLY.25 ILE.21 LEU.24 ARG.19 TRP.1 ASP.18 GLU.16 TYR.5
3bhgA TOT.419 # CYS.3 GLN.23 ILE.29 SER.27 VAL.24 LYS.26 PRO.16 THR.27 PHE.20 ASN.29 HIS.10 GLY.16 ASP.18 LEU.44 ARG.14 TRP.4 ALA.45 GLU.26 TYR.18
3rdeA TOT.552 # CYS.9 GLN.25 HIS.16 SER.36 VAL.34 LYS.24 TRP.12 PRO.33 THR.25 PHE.25 ASN.15 GLY.34 ILE.21 LEU.79 ARG.32 ASP.30 ALA.38 GLU.38 TYR.12 MET.14
3cfxA TOT.293 # GLN.11 HIS.4 ASN.16 VAL.22 MET.9 TRP.2 PRO.15 LYS.6 THR.16 PHE.8 ALA.28 GLY.18 ILE.17 LEU.25 ARG.9 ASP.16 GLU.31 TYR.18 SER.22
1vp8A TOT.175 # CYS.2 GLN.1 ASP.4 SER.10 VAL.19 LYS.9 ASN.6 PRO.6 THR.9 PHE.5 ALA.18 HIS.5 GLY.16 ILE.14 LEU.13 ARG.15 GLU.20 TYR.3
1nnwA TOT.224 # CYS.1 MET.6 ILE.24 GLN.2 VAL.20 LYS.10 PRO.19 THR.8 PHE.7 ALA.16 HIS.5 GLY.21 ASP.11 GLU.17 LEU.20 ARG.7 TRP.1 ASN.6 TYR.17 SER.6
2hlyA TOT.203 # CYS.1 MET.9 ILE.8 VAL.10 GLN.7 LYS.8 ASN.6 PRO.8 THR.10 PHE.14 ALA.30 GLY.17 HIS.4 LEU.14 ARG.10 TRP.5 ASP.12 GLU.8 TYR.8 SER.14
4hpmB TOT.81 # CYS.3 HIS.4 GLN.6 VAL.7 LYS.3 ILE.1 PRO.4 GLY.2 THR.2 PHE.2 GLU.4 MET.3 ASP.2 LEU.15 ARG.9 TRP.2 ALA.1 ASN.4 TYR.2 SER.5
4hpmA TOT.118 # CYS.3 ASP.7 ASN.3 GLN.5 LYS.4 PRO.10 GLY.5 THR.4 PHE.9 ALA.4 HIS.1 MET.2 ILE.2 LEU.16 ARG.9 TRP.1 VAL.7 GLU.9 TYR.3 SER.14
3cpqA TOT.99 # CYS.1 GLN.1 ILE.7 SER.4 VAL.12 LYS.12 PRO.4 THR.4 PHE.2 ALA.7 GLY.8 HIS.2 GLU.7 LEU.12 ARG.2 ASP.5 ASN.4 TYR.3 MET.2
2g76A TOT.285 # CYS.11 ILE.18 SER.16 GLN.12 MET.7 ASN.11 PRO.12 LYS.10 THR.18 PHE.7 ALA.26 HIS.3 GLY.28 ASP.14 LEU.31 ARG.14 TRP.2 VAL.24 GLU.20 TYR.1
4cogA TOT.207 # CYS.4 GLN.2 HIS.7 SER.8 VAL.23 LYS.3 ILE.9 PRO.24 GLY.12 THR.11 PHE.2 ALA.29 MET.3 ASP.18 GLU.7 LEU.21 ARG.14 TRP.4 ASN.2 TYR.4
3takA TOT.291 # CYS.2 GLN.8 ILE.28 SER.11 VAL.20 LYS.18 ASN.16 PRO.14 THR.20 PHE.1 ALA.35 HIS.5 GLY.22 ASP.15 LEU.29 ARG.9 TRP.4 GLU.21 TYR.7 MET.6
4c2eA TOT.435 # ASP.29 SER.31 GLN.20 LYS.53 ASN.17 PRO.16 THR.21 PHE.15 ALA.31 HIS.8 GLY.34 ILE.32 LEU.33 ARG.12 TRP.2 VAL.24 GLU.34 TYR.13 MET.10
3i28A TOT.545 # CYS.13 MET.23 ASP.26 GLN.21 VAL.35 LYS.33 ASN.19 PRO.34 THR.24 PHE.25 ALA.41 HIS.10 GLY.33 ILE.24 LEU.61 ARG.26 TRP.12 GLU.41 TYR.13 SER.31
3fsgA TOT.261 # CYS.1 HIS.9 GLN.15 VAL.11 LYS.12 ILE.26 PRO.9 THR.12 PHE.17 ALA.9 GLY.18 ASP.15 GLU.18 LEU.30 ARG.8 TRP.1 ASN.22 TYR.12 SER.16
3loiA TOT.160 # CYS.3 MET.5 ASP.9 VAL.13 GLN.6 LYS.7 ILE.7 PRO.10 THR.5 PHE.8 ALA.8 GLY.12 HIS.8 ASN.2 LEU.12 ARG.11 TRP.2 GLU.13 TYR.7 SER.12
4rfbA TOT.194 # GLN.5 ILE.11 SER.12 VAL.13 LYS.35 PRO.3 THR.9 PHE.7 GLU.21 HIS.3 GLY.12 ASP.15 LEU.16 ARG.7 TRP.1 ALA.2 ASN.7 TYR.12 MET.3
3emuA TOT.139 # CYS.1 ILE.21 SER.11 GLN.7 LYS.8 THR.4 PRO.5 GLY.8 HIS.4 PHE.8 ALA.6 MET.2 ASP.5 GLU.6 LEU.17 ARG.3 VAL.7 ASN.10 TYR.6
3c0wA TOT.223 # CYS.3 GLN.10 ILE.17 SER.10 VAL.11 MET.8 PRO.9 LYS.24 THR.8 PHE.10 ALA.7 HIS.4 GLY.10 ASP.8 GLU.11 LEU.25 ARG.4 TRP.5 ASN.24 TYR.15
4rglA TOT.305 # CYS.1 ASP.18 VAL.20 GLN.13 LYS.3 PRO.18 THR.20 PHE.9 ALA.30 HIS.7 GLY.21 ILE.18 GLU.24 LEU.34 ARG.29 TRP.5 ASN.14 TYR.10 SER.11
4l9zA TOT.313 # CYS.3 MET.9 ILE.20 GLN.14 VAL.21 LYS.12 ASN.7 PRO.16 THR.12 PHE.10 ALA.51 HIS.6 GLY.24 ASP.22 LEU.21 ARG.20 TRP.6 GLU.18 TYR.6 SER.15
3kcqA TOT.202 # CYS.6 MET.2 ILE.17 VAL.18 GLN.8 LYS.11 PHE.7 PRO.8 THR.8 TRP.1 ALA.19 GLY.13 HIS.7 GLU.14 LEU.23 ARG.7 ASP.9 ASN.5 TYR.5 SER.14
3hoiA TOT.180 # CYS.1 HIS.5 SER.18 GLN.7 LYS.9 ASN.11 PRO.8 THR.7 PHE.3 ALA.23 GLY.13 ASP.12 ILE.7 LEU.23 ARG.10 TRP.1 VAL.12 GLU.5 TYR.5
3d8kA TOT.334 # CYS.2 GLN.8 ASP.16 SER.24 VAL.32 LYS.13 ILE.13 PRO.15 THR.24 PHE.16 ALA.37 GLY.28 HIS.11 GLU.21 LEU.23 ARG.31 TRP.1 ASN.13 TYR.6
2j4dA TOT.496 # CYS.9 GLN.12 ASP.32 SER.33 VAL.33 LYS.32 PRO.26 GLY.38 THR.25 PHE.28 ASN.18 HIS.9 MET.11 ILE.17 LEU.50 ARG.37 TRP.15 ALA.19 GLU.32 TYR.20
1j27A TOT.98 # GLN.1 ASP.2 SER.2 VAL.5 LYS.5 ASN.1 PRO.4 THR.4 PHE.6 ALA.17 GLY.7 ILE.1 LEU.15 ARG.9 TRP.2 GLU.11 TYR.4 MET.2
2p67A TOT.301 # CYS.4 HIS.7 GLN.18 VAL.21 MET.7 ILE.19 PRO.8 LYS.10 THR.19 PHE.8 ALA.30 GLY.18 ASP.14 ASN.10 LEU.35 ARG.25 TRP.3 GLU.23 TYR.6 SER.16
2fp4A TOT.304 # CYS.6 MET.5 ILE.24 GLN.14 VAL.22 LYS.22 PRO.18 THR.24 PHE.10 ALA.25 GLY.42 HIS.8 GLU.17 LEU.20 ARG.10 ASP.7 ASN.11 TYR.6 SER.13
2yo3A TOT.252 # ILE.24 GLN.10 VAL.22 LYS.17 GLY.19 THR.22 PHE.1 ASN.26 HIS.2 MET.3 ASP.15 LEU.10 ARG.9 ALA.26 GLU.17 TYR.7 SER.22
3cvgA TOT.265 # ILE.19 VAL.15 GLN.9 LYS.21 TRP.5 PRO.15 THR.14 PHE.9 ALA.26 GLY.22 HIS.5 GLU.12 LEU.20 ARG.10 ASP.19 ASN.8 TYR.16 SER.20
1ybzA TOT.62 # ASP.4 VAL.3 GLN.3 LYS.3 ASN.1 PRO.1 THR.2 PHE.2 ALA.3 GLY.3 ILE.9 LEU.10 ARG.6 GLU.9 SER.3
4oujA TOT.279 # CYS.2 MET.2 ASP.17 VAL.17 GLN.14 LYS.17 PRO.6 THR.19 PHE.11 GLU.4 HIS.1 GLY.12 ILE.25 LEU.24 ARG.9 TRP.8 ALA.16 ASN.38 TYR.16 SER.21
3kspA TOT.122 # ASP.8 SER.13 GLN.10 LYS.2 THR.5 PRO.4 HIS.8 PHE.7 ALA.6 GLY.7 ILE.5 GLU.10 LEU.12 ARG.5 TRP.4 VAL.7 ASN.3 TYR.6
4lnsA TOT.290 # CYS.3 ASP.15 SER.15 GLN.14 LYS.19 PRO.9 THR.11 PHE.9 ALA.20 HIS.9 GLY.18 ILE.16 GLU.20 LEU.36 ARG.16 TRP.5 VAL.29 ASN.10 TYR.9 MET.7
1v18B TOT.36 # GLN.1 HIS.1 SER.1 VAL.2 LYS.1 ILE.2 PRO.4 THR.3 PHE.2 ALA.3 GLY.1 ASP.4 LEU.6 ARG.1 GLU.3 MET.1
4q94A TOT.117 # CYS.1 GLN.4 HIS.6 SER.16 VAL.8 GLY.5 ASN.5 PRO.3 LYS.6 ASP.3 THR.3 PHE.6 ALA.7 MET.1 ILE.5 LEU.16 ARG.8 TRP.3 GLU.9 TYR.2
1vs3A TOT.249 # CYS.1 GLN.5 HIS.7 SER.5 VAL.18 LYS.9 ASN.2 PRO.17 THR.7 PHE.8 ALA.30 GLY.23 ILE.4 LEU.40 ARG.29 TRP.2 ASP.8 GLU.24 TYR.6 MET.4
3di2A TOT.95 # CYS.4 ASP.7 SER.5 GLN.4 LYS.7 THR.4 HIS.2 PHE.8 ALA.3 GLY.6 ILE.5 GLU.5 LEU.17 ARG.4 TRP.1 VAL.3 ASN.6 TYR.1 MET.3
4q9mA TOT.230 # HIS.5 GLN.11 VAL.11 LYS.14 ASN.15 PRO.11 GLY.14 THR.17 PHE.10 ALA.19 MET.5 ILE.16 LEU.25 ARG.11 ASP.13 TRP.4 GLU.16 TYR.8 SER.5
3sjaC TOT.61 # HIS.3 SER.5 GLN.2 LYS.10 TRP.1 THR.1 PHE.1 GLU.7 MET.1 ILE.3 LEU.6 ARG.2 ASP.4 ALA.3 VAL.1 ASN.9 TYR.2
1a5tA TOT.319 # CYS.7 GLN.16 ILE.6 SER.14 VAL.18 LYS.8 PRO.18 GLY.20 THR.16 PHE.4 GLU.18 HIS.11 MET.6 ASP.14 LEU.55 ARG.21 TRP.8 ALA.41 ASN.7 TYR.11
3eyaA TOT.526 # CYS.10 GLN.19 HIS.18 SER.31 VAL.42 LYS.26 ASN.16 PRO.27 ASP.26 THR.21 PHE.19 ALA.61 GLY.43 ILE.29 LEU.49 ARG.22 TRP.4 GLU.34 TYR.12 MET.17
2z7xB TOT.520 # CYS.12 ILE.40 SER.59 GLN.24 LYS.40 PRO.18 HIS.16 PHE.25 THR.30 GLY.16 ASP.26 GLU.25 LEU.74 ARG.12 TRP.8 ALA.10 VAL.29 ASN.37 TYR.11 MET.8
2v5iA TOT.552 # CYS.6 HIS.9 SER.46 GLN.15 LYS.23 TRP.9 PRO.25 THR.27 PHE.19 ASN.37 GLY.66 ILE.39 LEU.51 ARG.19 ASP.40 ALA.40 VAL.41 GLU.15 TYR.16 MET.9
2oqoA TOT.181 # ILE.15 SER.4 GLN.8 LYS.14 ASN.8 PRO.7 THR.8 PHE.8 ALA.20 HIS.5 GLY.9 ASP.5 LEU.18 ARG.11 TRP.2 VAL.12 GLU.16 TYR.9 MET.2
2zfiA TOT.326 # CYS.4 ASP.20 SER.32 GLN.12 LYS.18 ASN.21 PRO.11 THR.24 PHE.8 ALA.22 HIS.5 GLY.17 ILE.19 LEU.24 ARG.20 TRP.2 VAL.20 GLU.21 TYR.15 MET.11
3r0vA TOT.249 # GLN.7 ILE.12 SER.14 VAL.21 ASN.3 PRO.26 THR.19 PHE.9 ALA.37 GLY.24 HIS.5 LEU.19 ARG.15 TRP.2 ASP.17 GLU.12 TYR.7
4qiwA TOT.863 # CYS.10 ILE.62 SER.27 GLN.27 VAL.57 LYS.55 THR.43 PRO.50 HIS.22 PHE.22 GLU.77 GLY.68 ASP.52 LEU.80 ARG.66 TRP.8 ALA.52 ASN.26 TYR.31 MET.28
3iuzA TOT.304 # CYS.1 ASP.24 VAL.24 GLN.10 PRO.15 THR.20 PHE.17 ALA.36 HIS.7 GLY.31 ILE.10 GLU.18 LEU.30 ARG.28 TRP.3 ASN.9 TYR.6 SER.15
2g6fX TOT.59 # GLN.2 ILE.2 SER.4 VAL.6 LYS.2 PRO.2 ASP.2 THR.4 PHE.4 ASN.4 GLY.8 HIS.2 LEU.2 ARG.4 TRP.3 ALA.1 GLU.6 TYR.1
3r0qA TOT.317 # CYS.5 GLN.13 ILE.23 SER.25 VAL.24 LYS.8 ASN.16 PRO.11 THR.16 PHE.16 ALA.24 HIS.11 GLY.20 ASP.20 LEU.22 ARG.10 TRP.8 GLU.21 TYR.12 MET.12
3wj9A TOT.391 # CYS.5 GLN.17 ASP.15 SER.31 VAL.21 LYS.24 PRO.25 THR.27 PHE.24 ALA.36 HIS.4 GLY.24 ILE.20 GLU.21 LEU.28 ARG.15 TRP.7 ASN.30 TYR.17
4j7cI TOT.429 # CYS.1 ILE.48 SER.27 GLN.11 MET.14 ASN.10 PRO.15 LYS.15 THR.45 PHE.39 ALA.31 GLY.39 HIS.4 LEU.55 ARG.11 TRP.4 ASP.8 VAL.34 GLU.11 TYR.7
4m3lA TOT.58 # ILE.5 SER.4 GLN.8 LYS.5 THR.4 PHE.1 ALA.4 GLY.1 ASP.4 LEU.9 ARG.1 VAL.1 GLU.8 TYR.2 MET.1
1qzuA TOT.121 # CYS.3 GLN.2 ASP.8 SER.5 VAL.13 MET.4 ASN.3 PRO.8 LYS.3 THR.7 PHE.2 ALA.14 HIS.4 GLY.7 ILE.4 LEU.17 ARG.5 TRP.5 GLU.4 TYR.3
1kr4A TOT.107 # CYS.1 GLN.1 ILE.8 SER.4 VAL.4 LYS.10 ASN.4 PRO.3 ASP.1 THR.6 PHE.6 ALA.7 GLY.5 HIS.2 LEU.13 ARG.5 TRP.4 GLU.17 TYR.6
2i2cA TOT.255 # CYS.1 GLN.4 ILE.18 SER.20 VAL.19 LYS.14 ASN.7 PRO.10 THR.12 PHE.15 ALA.15 HIS.11 GLY.20 ASP.18 LEU.21 ARG.12 TRP.2 GLU.16 TYR.12 MET.8
1qnaA TOT.180 # CYS.3 MET.5 ILE.17 VAL.13 GLN.4 LYS.18 PRO.10 THR.7 PHE.12 ALA.18 HIS.2 GLY.9 ASP.6 GLU.9 LEU.14 ARG.9 ASN.6 TYR.7 SER.11
3g7uA TOT.348 # CYS.3 MET.6 HIS.9 GLN.11 VAL.21 LYS.22 TRP.5 PRO.20 THR.13 PHE.20 GLU.15 GLY.27 ILE.31 LEU.29 ARG.19 ASP.24 ALA.18 ASN.17 TYR.12 SER.26
1js1X TOT.324 # CYS.4 ASP.18 SER.14 GLN.11 LYS.17 PRO.16 GLY.15 THR.17 PHE.16 ALA.26 HIS.12 MET.12 ILE.22 GLU.23 LEU.23 ARG.19 TRP.5 VAL.23 ASN.19 TYR.12
4a20A TOT.78 # ASP.4 SER.8 GLN.3 LYS.8 THR.5 PRO.4 GLY.1 HIS.5 PHE.3 ALA.5 MET.1 ILE.9 ASN.3 LEU.11 VAL.4 GLU.4
3vx7B TOT.146 # CYS.1 GLN.4 ILE.10 SER.12 VAL.11 MET.3 PRO.5 LYS.3 THR.11 PHE.4 GLU.8 HIS.4 GLY.4 ASP.13 LEU.24 ARG.8 TRP.3 ALA.2 ASN.7 TYR.9
1e0tA TOT.437 # CYS.6 GLN.11 ASP.26 SER.22 VAL.44 LYS.24 PRO.11 THR.34 PHE.11 ALA.40 HIS.8 GLY.39 ILE.32 GLU.34 LEU.38 ARG.17 ASN.20 TYR.4 MET.16
2xgvA TOT.128 # ASP.5 SER.7 GLN.12 LYS.2 PRO.7 THR.9 PHE.2 ALA.16 HIS.1 GLY.11 ILE.6 GLU.9 LEU.13 ARG.7 TRP.5 VAL.7 ASN.2 TYR.4 MET.3
4gbfA TOT.369 # CYS.6 GLN.8 ILE.28 SER.29 VAL.31 LYS.10 PRO.22 THR.26 PHE.15 ALA.24 HIS.12 GLY.30 ASP.24 GLU.17 LEU.15 ARG.9 TRP.10 ASN.26 TYR.17 MET.10
1ogqA TOT.313 # CYS.8 MET.2 ASP.16 VAL.11 GLN.11 LYS.15 PRO.22 THR.23 PHE.13 ALA.15 HIS.4 GLY.24 ILE.18 GLU.3 LEU.50 ARG.9 TRP.2 ASN.30 TYR.10 SER.27
2h6oA TOT.424 # CYS.10 GLN.13 ASP.21 SER.33 VAL.28 LYS.15 PRO.27 THR.46 PHE.20 ALA.30 HIS.6 GLY.32 ILE.26 GLU.21 LEU.31 ARG.9 TRP.5 ASN.30 TYR.14 MET.7
4ua8A TOT.383 # CYS.5 GLN.11 ASP.36 SER.20 VAL.25 MET.8 ASN.29 PRO.13 LYS.30 THR.22 PHE.20 ALA.53 HIS.1 GLY.31 ILE.14 LEU.23 ARG.2 TRP.5 GLU.20 TYR.15
2opwA TOT.274 # CYS.4 GLN.17 HIS.11 SER.24 VAL.22 MET.6 ILE.10 PRO.19 LYS.8 THR.15 PHE.20 ALA.17 GLY.21 ASP.10 ASN.6 LEU.27 ARG.13 TRP.4 GLU.15 TYR.5
2grvA TOT.516 # CYS.2 ILE.30 SER.27 GLN.27 VAL.53 LYS.8 PRO.45 THR.34 PHE.10 ASN.16 HIS.3 GLY.39 ASP.44 LEU.44 ARG.31 TRP.9 ALA.65 GLU.14 TYR.9 MET.6
1mwqA TOT.98 # ILE.5 ASN.5 GLN.7 LYS.6 PRO.6 THR.4 PHE.5 ALA.14 HIS.2 GLY.4 ASP.6 LEU.8 ARG.4 TRP.1 VAL.8 GLU.7 TYR.4 SER.2
3vhlA TOT.264 # CYS.3 GLN.14 ASP.10 SER.6 VAL.17 LYS.20 ASN.8 PRO.15 THR.17 PHE.18 ALA.14 HIS.7 GLY.13 ILE.13 LEU.22 ARG.20 GLU.27 TYR.12 MET.8
3h2zA TOT.368 # CYS.1 GLN.17 HIS.10 SER.14 VAL.37 LYS.22 TRP.2 PRO.15 THR.17 PHE.11 ALA.44 GLY.31 ILE.24 GLU.24 LEU.37 ARG.16 ASP.25 ASN.14 TYR.7
4jf8A TOT.138 # MET.1 GLN.11 ASP.9 ASN.8 VAL.12 LYS.3 PRO.4 THR.15 PHE.3 ALA.9 HIS.2 GLY.9 ILE.7 LEU.11 ARG.9 TRP.1 GLU.5 TYR.11 SER.8
4ml7B TOT.98 # CYS.2 GLN.1 ASP.6 SER.11 VAL.8 LYS.9 PRO.3 THR.6 ASN.5 GLY.7 ILE.8 LEU.8 TRP.2 ALA.8 GLU.7 TYR.6 MET.1
3dxeA TOT.124 # CYS.6 ASP.3 VAL.14 GLN.6 MET.3 ILE.3 PRO.6 LYS.2 THR.5 PHE.7 ALA.16 GLY.6 HIS.4 GLU.6 LEU.11 ARG.6 TRP.2 ASN.3 TYR.3 SER.12
1r9oA TOT.455 # CYS.10 MET.13 ILE.32 VAL.25 GLN.12 LYS.35 PRO.31 THR.24 PHE.31 ALA.18 HIS.14 GLY.26 ASP.20 GLU.32 LEU.49 ARG.20 TRP.2 ASN.23 TYR.12 SER.26
2fnuA TOT.372 # CYS.5 GLN.14 HIS.15 SER.33 VAL.19 LYS.35 ASN.18 PRO.12 THR.16 PHE.25 ALA.29 GLY.16 ILE.18 LEU.47 ARG.9 ASP.13 GLU.29 TYR.13 MET.6
3v0dA TOT.325 # CYS.7 GLN.8 ASP.29 SER.20 VAL.26 LYS.28 ASN.13 PRO.11 THR.22 PHE.20 ALA.12 GLY.24 HIS.8 ILE.15 LEU.22 ARG.19 TRP.4 GLU.17 TYR.14 MET.6
4fmwA TOT.160 # CYS.2 HIS.12 SER.8 GLN.8 LYS.10 TRP.3 PRO.5 THR.6 PHE.6 GLU.10 GLY.8 ILE.14 LEU.21 ARG.4 ASP.11 ALA.7 VAL.11 ASN.7 TYR.7
3h8mA TOT.71 # CYS.1 GLN.4 ASP.3 SER.6 VAL.4 GLY.4 PRO.1 LYS.4 THR.7 PHE.3 ASN.2 HIS.1 MET.6 ILE.5 LEU.5 ARG.3 TRP.1 ALA.5 GLU.4 TYR.2
3gcfA TOT.367 # CYS.4 ILE.10 SER.15 GLN.13 VAL.37 LYS.16 ASN.8 PHE.21 PRO.23 THR.17 TRP.12 ALA.25 GLY.30 HIS.11 LEU.29 ARG.20 ASP.27 GLU.33 TYR.11 MET.5
3oajA TOT.310 # HIS.12 SER.4 GLN.13 LYS.13 ILE.19 PRO.16 THR.21 PHE.17 GLU.28 GLY.37 ASP.19 LEU.21 ARG.16 TRP.5 ALA.19 VAL.22 ASN.10 TYR.12 MET.6
3wa0G TOT.9 # ILE.1 VAL.1 GLY.1 ASP.1 LEU.2 GLU.3
4bxtA TOT.24 # ILE.3 SER.3 LYS.1 THR.1 ALA.1 GLY.1 LEU.7 ARG.2 GLU.4 MET.1
2bk8A TOT.97 # CYS.2 ILE.5 SER.5 GLN.4 LYS.7 ASP.7 THR.5 PHE.2 GLU.10 GLY.10 HIS.2 LEU.4 ARG.3 TRP.1 ALA.4 VAL.12 ASN.3 TYR.9 MET.2
4qmaA TOT.187 # CYS.1 GLN.6 HIS.9 SER.14 VAL.14 LYS.1 ASN.4 PRO.16 THR.6 PHE.6 ALA.14 GLY.19 ASP.11 ILE.10 LEU.18 ARG.14 TRP.4 GLU.12 TYR.8
3tu6A TOT.125 # CYS.1 GLN.2 HIS.2 SER.4 VAL.11 MET.7 TRP.1 PRO.7 LYS.10 THR.5 PHE.3 ALA.17 GLY.16 ILE.8 GLU.13 LEU.4 ARG.3 ASP.3 ASN.4 TYR.4
3lyyA TOT.101 # GLN.2 ILE.2 SER.3 VAL.13 LYS.4 PRO.6 THR.18 PHE.3 GLU.9 HIS.2 GLY.8 ASP.15 LEU.1 ARG.1 TRP.1 ALA.6 ASN.3 TYR.4
4me2A TOT.194 # CYS.1 GLN.3 ILE.2 SER.11 VAL.15 LYS.7 ASN.1 PRO.7 THR.5 PHE.2 ALA.44 HIS.4 GLY.12 ASP.10 LEU.20 ARG.17 TRP.5 GLU.18 TYR.6 MET.4
2pqfA TOT.182 # CYS.3 GLN.15 ASP.7 SER.17 VAL.17 LYS.10 ILE.7 PRO.6 THR.9 PHE.14 GLU.9 GLY.12 HIS.6 LEU.8 ARG.8 TRP.5 ALA.11 ASN.7 TYR.11
1g94A TOT.447 # CYS.8 ILE.19 SER.37 GLN.19 LYS.13 PRO.13 THR.26 PHE.20 ALA.39 HIS.12 GLY.45 ASP.28 GLU.18 LEU.23 ARG.13 TRP.12 VAL.33 ASN.41 TYR.19 MET.9
3l23A TOT.246 # CYS.3 HIS.7 VAL.19 GLN.12 LYS.19 ILE.19 PRO.11 THR.11 PHE.12 ASN.9 GLY.21 ASP.22 LEU.15 ARG.5 TRP.2 ALA.21 GLU.13 TYR.15 SER.10
1nbuA TOT.118 # GLN.4 ASP.13 SER.3 VAL.17 LYS.2 ILE.8 PRO.5 THR.5 PHE.2 GLU.7 GLY.6 HIS.6 LEU.6 ARG.12 TRP.1 ALA.16 ASN.1 TYR.3 MET.1
1nycA TOT.111 # CYS.1 HIS.7 SER.9 GLN.10 LYS.4 ILE.14 PRO.1 THR.9 PHE.5 GLU.4 GLY.5 ASP.8 LEU.10 ARG.4 TRP.1 ALA.1 VAL.3 ASN.7 TYR.6 MET.2
4b0hA TOT.130 # CYS.1 MET.5 HIS.2 GLN.5 VAL.10 LYS.12 ASN.3 PRO.5 THR.7 PHE.6 ALA.7 GLY.8 ASP.10 ILE.11 LEU.8 ARG.6 TRP.2 GLU.12 TYR.5 SER.5
2gbwA TOT.449 # CYS.8 GLN.10 HIS.16 SER.27 VAL.24 MET.9 ILE.25 PRO.20 LYS.17 THR.25 PHE.25 ALA.32 GLY.46 ASP.28 GLU.29 LEU.29 ARG.26 TRP.14 ASN.22 TYR.17
2gbwB TOT.170 # CYS.1 ILE.8 SER.4 GLN.9 VAL.14 LYS.6 ASN.7 PRO.8 THR.8 PHE.8 ALA.8 GLY.9 HIS.4 LEU.12 ARG.19 TRP.3 ASP.15 GLU.13 TYR.10 MET.4
3a0oA TOT.764 # CYS.7 GLN.30 ILE.28 SER.47 VAL.49 LYS.24 PRO.45 HIS.28 PHE.36 THR.40 GLY.52 ASP.57 GLU.44 LEU.64 ARG.47 TRP.23 ALA.75 ASN.22 TYR.39 MET.7
2g3rA TOT.119 # CYS.2 HIS.1 SER.9 GLN.3 LYS.10 PRO.2 ASP.8 THR.3 PHE.4 ASN.2 GLY.14 ILE.5 LEU.13 ARG.7 TRP.2 ALA.5 VAL.9 GLU.10 TYR.9 MET.1
4k8lA TOT.305 # CYS.6 GLN.7 HIS.7 SER.21 VAL.29 LYS.11 TRP.3 PRO.21 GLY.32 THR.19 PHE.10 ALA.22 MET.10 ILE.24 GLU.20 LEU.19 ARG.17 ASP.15 ASN.10 TYR.2
4fd7A TOT.237 # CYS.5 ILE.12 SER.13 GLN.11 GLY.12 TRP.4 PRO.8 LYS.10 THR.10 PHE.13 ALA.21 MET.7 HIS.4 ASN.10 LEU.18 ARG.19 ASP.20 VAL.19 GLU.11 TYR.10
3r75A TOT.610 # CYS.6 GLN.16 HIS.23 SER.28 VAL.47 LYS.9 ILE.38 PRO.30 GLY.55 THR.36 PHE.21 ALA.73 MET.15 ASP.42 ASN.9 LEU.51 ARG.51 TRP.3 GLU.41 TYR.16
2r3sA TOT.312 # CYS.3 ILE.19 SER.26 GLN.16 LYS.11 ASN.15 PRO.15 THR.19 PHE.20 ALA.40 HIS.8 GLY.18 ASP.14 LEU.29 ARG.8 TRP.2 VAL.24 GLU.15 TYR.10
1lm7A TOT.238 # CYS.3 MET.2 ILE.19 GLN.8 VAL.12 LYS.15 PRO.11 THR.14 PHE.8 ALA.13 HIS.2 GLY.21 ASP.12 GLU.28 LEU.28 ARG.11 ASN.9 TYR.8 SER.14
4bmhA TOT.201 # CYS.1 MET.3 ASP.13 VAL.18 GLN.3 LYS.1 ILE.4 PRO.23 THR.7 PHE.7 ALA.28 GLY.14 HIS.10 ASN.1 LEU.18 ARG.20 TRP.2 GLU.12 TYR.10 SER.6
3qy3A TOT.129 # CYS.1 GLN.4 ILE.4 ASN.3 VAL.14 LYS.2 PRO.7 THR.9 PHE.2 ALA.11 HIS.9 GLY.10 ASP.5 LEU.16 ARG.7 TRP.3 GLU.10 TYR.6 SER.6
2bbrA TOT.189 # CYS.7 HIS.5 SER.21 GLN.10 LYS.5 PRO.5 THR.8 PHE.6 ALA.12 GLY.6 ASP.8 GLU.16 LEU.41 ARG.14 VAL.13 ASN.3 TYR.5 MET.4
2x3gA TOT.113 # ILE.12 SER.11 VAL.6 LYS.17 PRO.2 HIS.8 PHE.7 THR.8 GLY.3 ASP.7 GLU.3 LEU.7 ARG.4 ASN.7 TYR.11
4kgqC TOT.167 # CYS.18 GLN.8 ILE.1 SER.13 VAL.5 PRO.18 THR.16 TRP.2 GLU.9 GLY.13 HIS.9 LEU.8 ARG.14 ASP.3 ALA.14 ASN.6 TYR.4 PHE.6
3u40A TOT.221 # CYS.6 ILE.13 SER.12 GLN.6 MET.10 ASN.6 PRO.5 LYS.8 HIS.4 PHE.6 ALA.28 GLY.24 ASP.13 LEU.17 ARG.9 TRP.1 THR.9 VAL.15 GLU.10 TYR.19
3kg5A TOT.103 # CYS.5 ILE.5 SER.8 GLN.9 MET.5 PRO.2 LYS.6 THR.5 PHE.5 ASN.7 HIS.1 GLY.8 ASP.2 LEU.6 ARG.7 TRP.3 ALA.3 VAL.4 GLU.9 TYR.3
1vhnA TOT.272 # CYS.2 GLN.4 ILE.17 ASN.5 VAL.25 LYS.16 PRO.9 THR.12 PHE.19 ALA.22 HIS.3 GLY.22 ASP.10 LEU.27 ARG.19 TRP.5 GLU.31 TYR.7 SER.17
2yzsA TOT.306 # CYS.1 GLN.5 ASP.7 SER.20 VAL.20 LYS.26 PRO.12 THR.17 PHE.18 ASN.20 HIS.9 GLY.13 ILE.20 LEU.45 ARG.11 TRP.1 ALA.11 GLU.30 TYR.20
3iv6A TOT.253 # CYS.3 GLN.4 ILE.14 SER.13 VAL.18 LYS.10 ASN.8 PRO.8 THR.17 PHE.15 ALA.24 HIS.4 GLY.16 ASP.22 LEU.28 ARG.22 TRP.3 GLU.19 TYR.5
2qz7A TOT.169 # GLN.3 HIS.6 ASN.4 VAL.17 LYS.4 ILE.6 PRO.11 THR.12 PHE.10 ALA.17 GLY.16 ASP.14 LEU.8 ARG.15 TRP.3 GLU.10 TYR.3 SER.10
1j0aA TOT.325 # GLN.3 ILE.29 SER.14 VAL.25 LYS.25 ASN.6 PRO.12 THR.14 PHE.10 ALA.25 HIS.5 GLY.41 ASP.16 LEU.40 ARG.15 TRP.1 GLU.26 TYR.14 MET.4
3wvoA TOT.543 # CYS.2 ILE.18 SER.18 GLN.22 LYS.20 PRO.32 THR.30 PHE.17 ALA.69 HIS.14 GLY.41 ASP.41 GLU.35 LEU.62 ARG.41 TRP.14 VAL.33 ASN.13 TYR.15 MET.6
1mo9A TOT.522 # CYS.6 GLN.13 ILE.26 SER.19 VAL.45 LYS.27 PRO.23 GLY.54 THR.26 PHE.22 ALA.45 HIS.14 MET.17 ASP.28 GLU.37 LEU.46 ARG.26 TRP.4 ASN.27 TYR.17
1oc0B TOT.37 # CYS.8 GLN.2 ASP.3 SER.3 VAL.1 LYS.3 THR.3 PHE.1 GLU.4 GLY.2 LEU.1 ARG.1 ALA.1 ASN.1 TYR.3
2q88A TOT.257 # CYS.4 GLN.5 ILE.14 SER.12 VAL.19 LYS.20 ASN.7 PRO.16 THR.5 PHE.9 ALA.39 HIS.1 GLY.24 ASP.19 LEU.21 ARG.12 GLU.20 TYR.6 MET.4
4ogpA TOT.314 # ILE.39 SER.25 GLN.17 LYS.25 THR.15 PRO.8 HIS.4 PHE.16 ASN.20 GLY.8 ASP.17 LEU.47 ARG.10 TRP.3 ALA.10 VAL.9 GLU.24 TYR.9 MET.8
3v5wG TOT.57 # CYS.1 GLN.2 ASP.3 SER.3 VAL.3 LYS.6 ILE.3 PRO.4 THR.1 PHE.1 GLU.6 MET.2 HIS.1 LEU.5 ARG.3 ALA.10 ASN.2 TYR.1
2h3lA TOT.103 # GLN.6 HIS.3 SER.8 VAL.9 LYS.5 ASN.4 PRO.6 THR.3 PHE.5 ALA.4 GLY.13 ILE.9 LEU.7 ARG.6 ASP.5 GLU.8 TYR.1 MET.1
2q5xA TOT.151 # CYS.2 GLN.3 ASP.11 SER.8 VAL.13 LYS.13 PRO.6 THR.9 PHE.5 ASN.6 HIS.2 GLY.14 ILE.11 LEU.12 ARG.9 TRP.2 ALA.6 GLU.10 TYR.8 MET.1
1nxcA TOT.449 # CYS.3 GLN.7 ASP.19 SER.28 VAL.23 LYS.23 ILE.24 PRO.19 THR.20 PHE.23 GLU.33 GLY.39 HIS.17 LEU.49 ARG.17 TRP.13 ALA.38 ASN.17 TYR.24 MET.13
2w1kA TOT.208 # CYS.1 GLN.12 HIS.8 SER.13 VAL.18 LYS.7 ILE.11 PRO.11 GLY.13 THR.11 PHE.7 ALA.15 MET.7 ASP.13 GLU.14 LEU.18 ARG.8 TRP.1 ASN.8 TYR.12
2y0cA TOT.461 # CYS.5 GLN.11 ASP.37 SER.23 VAL.36 LYS.17 ILE.29 PRO.20 THR.19 PHE.20 ALA.57 GLY.39 HIS.8 ASN.14 LEU.35 ARG.37 TRP.4 GLU.30 TYR.11 MET.9
4exlA TOT.261 # MET.5 ASP.16 VAL.27 GLN.12 LYS.15 ASN.13 PRO.7 THR.15 PHE.6 ALA.21 HIS.3 GLY.27 ILE.17 LEU.20 ARG.3 TRP.3 GLU.20 TYR.6 SER.25
1k0eA TOT.437 # CYS.6 ASP.27 VAL.26 GLN.28 LYS.10 THR.26 PRO.21 GLY.25 HIS.12 PHE.21 ASN.15 MET.7 ILE.25 LEU.45 ARG.28 TRP.7 ALA.37 GLU.30 TYR.11 SER.30
3uanA TOT.229 # CYS.2 GLN.10 ASP.12 SER.13 VAL.11 LYS.8 ILE.12 PRO.19 GLY.11 THR.11 PHE.15 ALA.9 MET.4 HIS.15 ASN.10 LEU.33 ARG.11 TRP.4 GLU.8 TYR.11
1y7uA TOT.160 # CYS.2 GLN.1 ASP.7 SER.19 VAL.19 LYS.12 ASN.5 PRO.6 HIS.5 PHE.9 ALA.11 GLY.5 ILE.8 LEU.9 ARG.12 TRP.2 THR.12 GLU.14 TYR.2
2pgwA TOT.362 # CYS.6 HIS.14 VAL.25 GLN.16 LYS.14 TRP.6 PRO.16 THR.13 PHE.11 ALA.45 GLY.35 ILE.31 GLU.25 LEU.32 ARG.20 ASP.21 ASN.9 TYR.11 SER.12
4isdA TOT.181 # CYS.3 ASP.15 SER.11 GLN.11 MET.3 ASN.1 PRO.10 LYS.6 THR.7 PHE.7 ALA.23 HIS.2 GLY.6 ILE.6 LEU.19 ARG.14 TRP.4 VAL.16 GLU.10 TYR.7
1eziA TOT.207 # CYS.3 GLN.10 ASP.9 SER.18 THR.11 LYS.9 ASN.14 PRO.11 HIS.7 PHE.7 ALA.19 GLY.12 ILE.22 LEU.22 ARG.9 VAL.9 GLU.12 TYR.3
2hsbA TOT.121 # CYS.4 HIS.2 GLN.2 VAL.4 LYS.13 TRP.1 THR.3 PHE.4 ALA.12 GLY.7 ILE.7 GLU.13 LEU.13 ARG.9 ASP.10 ASN.3 TYR.7 SER.7
3pctA TOT.233 # GLN.15 ASP.21 SER.14 VAL.20 LYS.17 ILE.6 PRO.3 GLY.20 THR.10 PHE.14 ALA.27 MET.6 HIS.2 GLU.8 LEU.13 ARG.8 TRP.6 ASN.16 TYR.7
2rhfA TOT.75 # ILE.3 SER.3 GLN.1 LYS.2 ASN.3 PRO.2 THR.5 PHE.2 ALA.11 HIS.1 GLY.5 ASP.3 LEU.11 ARG.7 VAL.4 GLU.10 TYR.2
3zf8A TOT.288 # CYS.1 ASP.16 ASN.17 GLN.13 MET.8 THR.17 PRO.13 LYS.17 HIS.11 PHE.12 ALA.25 GLY.15 ILE.21 LEU.29 ARG.12 TRP.4 VAL.11 GLU.23 TYR.13 SER.10
4ic1A TOT.194 # CYS.4 ILE.22 SER.11 GLN.4 VAL.13 LYS.14 PRO.7 HIS.5 THR.10 ALA.11 GLY.9 ASP.7 GLU.20 LEU.22 ARG.10 TRP.2 ASN.7 TYR.10 PHE.6
1ah7A TOT.245 # GLN.10 HIS.7 SER.11 VAL.14 LYS.20 ILE.9 PRO.7 THR.15 PHE.11 GLU.13 GLY.16 ASP.19 LEU.12 ARG.8 TRP.9 ALA.22 ASN.19 TYR.18 MET.5
3wmgA TOT.553 # CYS.3 GLN.23 ILE.36 SER.38 VAL.51 MET.13 PRO.17 LYS.11 THR.28 PHE.33 ALA.62 HIS.5 GLY.58 ASP.21 GLU.27 LEU.60 ARG.31 TRP.5 ASN.14 TYR.17
3tqoA TOT.377 # CYS.3 THR.8 GLN.12 ASP.23 SER.24 VAL.19 LYS.29 ASN.17 PRO.17 HIS.11 PHE.21 ALA.23 GLY.25 ILE.27 LEU.40 ARG.24 TRP.6 GLU.32 TYR.16
4jq6A TOT.197 # GLN.1 ILE.24 SER.6 VAL.20 LYS.7 ASN.5 PRO.4 THR.10 PHE.13 ALA.21 HIS.1 GLY.17 ASP.8 LEU.20 ARG.3 TRP.13 GLU.7 TYR.12 MET.5
1o9iA TOT.266 # GLN.12 ASP.16 SER.18 VAL.11 LYS.14 PRO.12 THR.13 PHE.10 ALA.19 HIS.10 GLY.25 ILE.8 GLU.25 LEU.24 ARG.12 TRP.3 ASN.11 TYR.7 MET.16
2h0bA TOT.175 # CYS.2 ILE.6 GLN.6 VAL.15 LYS.11 TRP.1 PRO.6 THR.12 PHE.8 GLU.8 GLY.16 HIS.3 LEU.18 ARG.5 ASP.12 ALA.9 ASN.13 TYR.8 SER.16
3eqtA TOT.127 # CYS.5 MET.3 ASP.5 GLN.6 VAL.18 LYS.9 ILE.5 PRO.8 THR.2 PHE.6 ALA.3 GLY.8 HIS.5 GLU.5 LEU.10 ARG.6 TRP.3 ASN.9 TYR.3 SER.8
3vpbE TOT.56 # CYS.3 ASP.5 GLN.2 VAL.8 MET.1 ASN.3 PRO.3 LYS.1 HIS.2 ALA.4 GLY.6 ILE.1 LEU.6 ARG.2 TRP.1 GLU.7 TYR.1
1z98A TOT.251 # CYS.4 ILE.21 VAL.24 GLN.4 GLY.29 ASN.7 PRO.10 LYS.9 ASP.5 THR.13 PHE.19 ALA.36 MET.4 HIS.5 LEU.24 ARG.7 TRP.6 GLU.4 TYR.8 SER.12
3ze3A TOT.116 # CYS.1 GLN.1 ILE.13 SER.8 VAL.14 LYS.3 ASN.2 THR.3 HIS.2 PHE.3 ALA.18 GLY.8 ASP.5 LEU.14 ARG.6 TRP.5 GLU.6 TYR.2 MET.2
3pt5A TOT.319 # CYS.7 HIS.17 SER.20 GLN.18 LYS.6 TRP.7 PRO.21 THR.18 PHE.15 ALA.29 GLY.23 ILE.16 GLU.12 LEU.22 ARG.19 ASP.21 VAL.11 ASN.15 TYR.17 MET.5
4nsvA TOT.264 # CYS.6 GLN.8 ASP.13 SER.33 VAL.16 LYS.4 PRO.8 THR.23 PHE.7 ALA.31 HIS.8 GLY.32 ILE.8 GLU.6 LEU.13 ARG.12 TRP.7 ASN.16 TYR.9 MET.4
3pywA TOT.178 # GLN.6 ILE.10 ASN.8 VAL.11 GLY.17 PRO.9 LYS.21 THR.14 PHE.8 ALA.19 HIS.1 MET.4 ASP.12 LEU.11 ARG.2 TRP.4 GLU.12 TYR.3 SER.6
1y4mA TOT.53 # CYS.3 ILE.3 SER.1 GLN.4 VAL.3 LYS.2 THR.4 PHE.1 GLU.2 GLY.3 ASP.4 LEU.7 ARG.2 TRP.1 ALA.7 ASN.3 MET.3
1rc6A TOT.242 # CYS.3 ILE.17 SER.14 GLN.8 LYS.10 TRP.2 PRO.10 THR.9 PHE.13 ASN.14 GLY.28 HIS.6 LEU.24 ARG.6 ASP.11 ALA.18 VAL.15 GLU.14 TYR.16 MET.4
4oleA TOT.116 # CYS.2 HIS.5 VAL.11 GLN.3 LYS.10 ILE.4 PRO.8 THR.9 PHE.6 ALA.7 GLY.10 ASP.5 ASN.4 LEU.10 ARG.3 TRP.5 GLU.4 TYR.1 SER.9
1p4oA TOT.308 # CYS.4 GLN.8 ASP.15 SER.20 VAL.27 LYS.15 ILE.12 PRO.16 THR.11 PHE.14 ALA.20 GLY.21 HIS.3 GLU.30 LEU.25 ARG.18 TRP.5 ASN.12 TYR.13 MET.19
2hytA TOT.181 # CYS.3 ASP.14 SER.9 GLN.9 LYS.3 ASN.2 PRO.4 THR.8 PHE.4 ALA.30 HIS.3 GLY.13 ILE.8 LEU.24 ARG.16 TRP.2 VAL.10 GLU.15 TYR.4
2rg4A TOT.206 # CYS.2 ASP.13 VAL.10 GLN.2 MET.5 LEU.21 PRO.14 LYS.6 HIS.8 THR.8 ALA.24 GLY.12 ILE.9 ASN.3 PHE.9 ARG.12 TRP.6 GLU.19 TYR.7 SER.16
1nqlB TOT.46 # CYS.6 MET.1 ASP.5 VAL.3 GLN.1 LYS.1 ILE.2 PRO.1 ALA.2 GLY.4 HIS.2 ASN.1 LEU.4 ARG.2 TRP.1 GLU.3 TYR.5 SER.2
4gytA TOT.177 # CYS.4 ASP.12 SER.17 GLN.11 MET.9 ASN.5 PRO.2 LYS.3 THR.5 PHE.10 ALA.13 HIS.5 GLY.10 ILE.5 LEU.23 ARG.6 TRP.1 VAL.9 GLU.22 TYR.5
4d5tA TOT.148 # CYS.2 ASP.16 GLN.5 VAL.8 LYS.6 PRO.2 GLY.3 THR.8 PHE.6 GLU.8 HIS.1 MET.4 ILE.24 LEU.14 ARG.5 ALA.5 ASN.15 TYR.7 SER.9
2f2eA TOT.140 # CYS.1 HIS.4 SER.10 GLN.6 LYS.4 ILE.4 PRO.8 THR.4 PHE.6 ALA.14 GLY.12 ASP.10 ASN.2 LEU.15 ARG.14 TRP.2 VAL.13 GLU.9 TYR.2
1tfeA TOT.142 # CYS.2 ILE.13 SER.1 GLN.9 VAL.12 LYS.11 ASN.7 PRO.4 THR.1 PHE.5 ALA.14 GLY.7 HIS.4 LEU.13 ARG.9 ASP.4 GLU.19 TYR.4 MET.3
1qsdA TOT.102 # GLN.8 ASP.11 SER.5 VAL.5 LYS.14 ILE.3 PRO.2 THR.7 PHE.2 ALA.6 GLY.2 HIS.1 LEU.14 ARG.4 GLU.13 TYR.5
1cv8A TOT.173 # CYS.1 GLN.12 HIS.5 ASN.23 VAL.9 LYS.7 ILE.9 PRO.5 GLY.16 THR.11 PHE.6 ALA.11 MET.7 ASP.4 LEU.11 ARG.7 TRP.4 GLU.8 TYR.10 SER.7
1g12A TOT.167 # CYS.4 GLN.7 ILE.1 SER.22 VAL.6 MET.3 PRO.5 LYS.4 THR.19 PHE.8 ALA.24 HIS.6 GLY.10 ASP.8 GLU.5 LEU.7 ARG.4 TRP.2 ASN.9 TYR.13
4qrhA TOT.180 # CYS.1 ILE.9 SER.7 GLN.5 MET.6 ASN.6 PRO.6 LYS.15 THR.7 PHE.9 ALA.10 HIS.3 GLY.11 ASP.12 LEU.12 ARG.11 VAL.18 GLU.21 TYR.11
1ollA TOT.188 # CYS.5 GLN.6 ASP.5 SER.13 VAL.16 LYS.10 ASN.6 PRO.16 THR.12 PHE.10 ALA.8 HIS.6 GLY.14 ILE.6 LEU.15 ARG.9 TRP.3 GLU.13 TYR.10 MET.5
1s5pA TOT.222 # CYS.2 GLN.10 HIS.10 SER.8 ASN.7 VAL.18 LYS.9 TRP.3 PRO.13 THR.9 PHE.8 ALA.22 GLY.18 ILE.9 LEU.24 ARG.11 ASP.12 GLU.19 TYR.5 MET.5
4xp7A TOT.299 # CYS.9 ILE.21 VAL.27 GLN.15 LYS.7 ASN.9 PRO.13 GLY.14 THR.16 PHE.7 ALA.30 MET.9 HIS.7 LEU.30 ARG.21 TRP.1 ASP.16 GLU.20 TYR.10 SER.17
2xseA TOT.149 # CYS.3 HIS.5 GLN.6 VAL.9 LYS.16 ASN.5 PRO.6 ASP.6 THR.1 PHE.7 ALA.15 GLY.5 ILE.3 LEU.20 ARG.10 TRP.5 GLU.18 TYR.2 SER.7
4jo4L TOT.211 # CYS.7 GLN.14 ILE.9 SER.22 VAL.21 LYS.9 PRO.10 THR.31 PHE.5 ALA.15 HIS.1 GLY.18 ASP.9 GLU.6 LEU.9 ARG.2 TRP.2 ASN.9 TYR.11 MET.1
2egjA TOT.125 # CYS.2 GLN.2 ASP.5 SER.6 VAL.12 LYS.11 PRO.3 GLY.5 THR.4 PHE.12 ASN.5 HIS.4 MET.3 ILE.6 LEU.10 ARG.8 ALA.6 GLU.12 TYR.9
1pwaA TOT.119 # CYS.4 HIS.6 SER.11 GLN.3 LYS.2 ASN.1 PRO.9 THR.2 PHE.3 ALA.8 GLY.9 ILE.5 LEU.16 ARG.8 ASP.5 VAL.9 GLU.9 TYR.5 MET.4
4g1hA TOT.176 # CYS.1 GLN.3 ILE.15 SER.11 VAL.16 LYS.11 ASN.8 PRO.9 THR.17 PHE.3 ALA.10 HIS.6 GLY.12 ASP.6 LEU.20 ARG.9 GLU.10 TYR.7 MET.2
2rb9A TOT.322 # CYS.7 ASP.17 GLN.10 VAL.26 MET.5 ASN.11 PRO.14 LYS.10 THR.18 PHE.9 ALA.43 HIS.6 GLY.33 ILE.20 LEU.42 ARG.15 TRP.2 GLU.20 TYR.3 SER.11
2uuyB TOT.52 # CYS.8 ILE.1 SER.2 VAL.3 GLY.7 ASN.2 PRO.3 LYS.3 THR.3 PHE.1 ALA.3 MET.2 LEU.1 ARG.4 TRP.1 GLU.3 TYR.5
3p06A TOT.189 # CYS.1 GLN.11 ILE.9 SER.13 VAL.21 LYS.11 ASN.10 PRO.11 THR.11 PHE.4 ALA.24 HIS.1 GLY.16 ASP.7 LEU.21 ARG.6 TRP.2 GLU.9 TYR.1
4m9dA TOT.409 # CYS.7 GLN.12 ILE.25 SER.20 VAL.45 LYS.23 PRO.16 THR.25 PHE.13 ASN.18 HIS.11 GLY.43 ASP.27 LEU.34 ARG.21 TRP.3 ALA.23 GLU.28 TYR.15
1qysA TOT.79 # ILE.8 GLN.4 VAL.9 LYS.5 ASN.5 THR.9 PHE.3 ALA.6 GLY.5 ASP.8 LEU.5 ARG.1 GLU.6 TYR.4 SER.1
3bvfA TOT.172 # CYS.1 MET.4 HIS.12 GLN.9 VAL.7 LYS.14 ILE.14 PRO.3 THR.4 PHE.8 ALA.11 GLY.6 ASP.9 ASN.12 LEU.17 ARG.1 TRP.2 GLU.17 TYR.7 SER.14
4nplA TOT.213 # CYS.5 GLN.4 ASP.16 ASN.3 VAL.21 LYS.11 PRO.11 THR.7 PHE.10 ALA.15 HIS.7 GLY.12 ILE.18 LEU.13 ARG.20 TRP.1 GLU.18 TYR.7 SER.14
2whnA TOT.109 # GLN.4 ILE.6 SER.6 VAL.5 MET.2 ASN.2 PRO.2 LYS.6 THR.5 PHE.5 ALA.10 HIS.1 GLY.9 ASP.4 LEU.21 ARG.10 GLU.10 TYR.1
3g91A TOT.260 # CYS.3 MET.5 HIS.6 ASN.13 GLN.4 LYS.15 TRP.7 PRO.11 THR.7 PHE.19 ALA.13 GLY.18 ILE.15 LEU.20 ARG.23 ASP.16 VAL.16 GLU.24 TYR.11 SER.14
2no2A TOT.102 # ASP.5 SER.10 GLN.12 LYS.7 ILE.1 ASN.2 THR.4 PHE.1 ALA.10 GLY.3 HIS.1 LEU.14 ARG.7 TRP.1 VAL.6 GLU.17 MET.1
1snzA TOT.344 # CYS.4 MET.1 ASP.17 GLN.15 VAL.31 LYS.18 ASN.16 PRO.19 THR.22 PHE.19 ALA.23 HIS.13 GLY.36 ILE.11 LEU.30 ARG.15 TRP.5 GLU.21 TYR.12 SER.16
3mk4A TOT.275 # CYS.4 GLN.16 ASP.12 SER.23 VAL.19 LYS.10 PRO.10 GLY.8 THR.18 PHE.9 ASN.14 HIS.7 MET.9 ILE.18 LEU.41 ARG.14 TRP.1 ALA.15 GLU.19 TYR.8
4acoA TOT.452 # CYS.8 HIS.14 SER.30 GLN.15 LYS.35 ILE.31 PRO.32 THR.25 PHE.36 ASN.28 GLY.14 ASP.30 LEU.52 ARG.18 TRP.7 ALA.11 VAL.11 GLU.28 TYR.25 MET.2
3c5oA TOT.148 # ILE.13 GLN.5 VAL.17 LYS.5 PRO.9 ASP.7 THR.10 PHE.8 ASN.3 GLY.16 HIS.3 LEU.10 ARG.11 TRP.1 ALA.9 GLU.12 TYR.6 SER.3
4umlA TOT.190 # CYS.4 GLN.5 ILE.8 SER.16 VAL.16 LYS.9 TRP.2 PRO.9 THR.12 PHE.9 ASN.9 GLY.12 HIS.3 LEU.23 ARG.8 ASP.10 ALA.13 GLU.12 TYR.8 MET.2
3rhgA TOT.362 # CYS.6 GLN.11 ASP.33 SER.20 VAL.22 LYS.24 ILE.28 PRO.15 THR.12 PHE.15 ALA.25 GLY.32 HIS.13 ASN.18 LEU.32 ARG.10 TRP.5 GLU.19 TYR.9 MET.13
4wckA TOT.420 # CYS.1 GLN.14 ILE.31 SER.22 VAL.23 MET.12 THR.11 PRO.25 LYS.36 HIS.13 PHE.24 ALA.28 GLY.20 ASP.21 GLU.27 LEU.44 ARG.17 TRP.2 ASN.33 TYR.16
1ywkA TOT.255 # CYS.4 ASP.13 VAL.12 GLN.8 MET.11 ASN.11 PRO.14 LYS.13 THR.18 PHE.10 ALA.10 HIS.10 GLY.18 ILE.22 LEU.14 ARG.10 TRP.3 GLU.24 TYR.14 SER.16
1t72A TOT.205 # CYS.1 ILE.20 VAL.15 GLN.7 LYS.15 ASN.8 PRO.5 THR.6 PHE.4 ALA.19 HIS.4 GLY.11 ASP.15 LEU.21 ARG.11 GLU.30 TYR.7 SER.6
4czuA TOT.297 # CYS.4 GLN.5 ILE.19 SER.15 VAL.22 LYS.31 PRO.12 THR.12 PHE.17 ALA.21 HIS.5 GLY.21 ASP.19 GLU.20 LEU.26 ARG.13 TRP.3 ASN.17 TYR.10 MET.5
1fotA TOT.299 # CYS.2 ILE.23 SER.14 GLN.10 LYS.19 THR.15 PRO.16 HIS.7 PHE.18 GLU.19 GLY.16 ASP.20 LEU.31 ARG.17 TRP.5 ALA.11 VAL.17 ASN.14 TYR.18 MET.7
1tu9A TOT.131 # CYS.3 HIS.4 VAL.5 GLN.3 LYS.4 ILE.5 PRO.2 GLY.8 THR.5 PHE.5 ALA.19 MET.7 LEU.12 ASP.13 ASN.2 ARG.13 TRP.2 GLU.3 TYR.6 SER.10
3e0rA TOT.235 # ASP.14 SER.19 GLN.7 LYS.17 ASN.10 PRO.8 THR.12 PHE.14 ALA.12 HIS.3 GLY.11 ILE.19 LEU.32 ARG.9 TRP.2 VAL.13 GLU.29 TYR.4
1pqwA TOT.176 # CYS.1 GLN.5 ILE.9 SER.13 VAL.18 LYS.6 ASN.2 PRO.4 THR.7 PHE.4 ALA.23 GLY.19 HIS.4 LEU.24 ARG.9 TRP.1 ASP.9 GLU.9 TYR.6 MET.3
3n1fC TOT.94 # CYS.2 ASP.7 GLN.5 VAL.4 LYS.5 PRO.6 GLY.6 THR.8 PHE.3 ASN.3 HIS.3 MET.4 ILE.9 LEU.2 ARG.2 TRP.2 ALA.2 GLU.7 TYR.7 SER.7
3kk4A TOT.122 # CYS.2 GLN.8 ILE.6 ASN.4 VAL.10 PRO.4 THR.4 PHE.4 ALA.14 HIS.1 GLY.6 ASP.6 LEU.16 ARG.15 TRP.1 GLU.8 TYR.5 SER.8
3skxA TOT.254 # CYS.1 MET.4 ASP.16 GLN.8 VAL.28 LYS.16 PRO.7 THR.12 PHE.9 ALA.30 HIS.3 GLY.23 ILE.19 GLU.26 LEU.17 ARG.13 TRP.1 ASN.6 TYR.5 SER.10
1pe9A TOT.360 # CYS.2 ILE.32 SER.35 GLN.11 LYS.18 PRO.9 THR.31 PHE.14 ALA.28 HIS.9 GLY.36 ASP.29 GLU.11 LEU.16 ARG.8 TRP.4 VAL.23 ASN.26 TYR.14 MET.4
3i7jA TOT.269 # CYS.2 GLN.7 ASP.15 SER.15 VAL.26 LYS.3 ILE.5 PRO.17 THR.22 PHE.11 ALA.39 GLY.31 HIS.7 ASN.5 LEU.27 ARG.14 TRP.6 GLU.12 TYR.5
4cbhA TOT.333 # CYS.3 ILE.22 SER.14 GLN.13 VAL.20 LYS.18 ASN.13 PRO.16 THR.23 PHE.10 ALA.25 HIS.6 GLY.19 ASP.17 LEU.32 ARG.20 TRP.2 GLU.27 TYR.18 MET.15
4pn6A TOT.167 # CYS.4 GLN.2 HIS.3 SER.15 VAL.15 LYS.10 PRO.14 GLY.11 THR.14 TRP.3 ALA.5 MET.5 ILE.3 GLU.5 LEU.16 ARG.9 ASP.8 ASN.14 TYR.7 PHE.4
4m7rA TOT.180 # CYS.2 GLN.8 ASP.7 SER.17 VAL.16 LYS.12 ASN.8 PRO.7 THR.9 PHE.7 ALA.13 HIS.4 GLY.13 ILE.8 LEU.24 ARG.5 TRP.1 GLU.17 TYR.1 MET.1
1x6iA TOT.88 # CYS.2 GLN.1 ILE.8 SER.3 VAL.2 LYS.3 THR.1 PRO.4 GLY.3 HIS.3 PHE.4 ASN.5 MET.6 ASP.9 LEU.8 ARG.10 TRP.2 ALA.5 GLU.8 TYR.1
3bptA TOT.338 # CYS.6 GLN.14 ASP.17 SER.22 VAL.19 LYS.18 PRO.12 THR.17 PHE.19 ALA.26 HIS.8 GLY.29 ILE.22 GLU.29 LEU.41 ARG.14 TRP.2 ASN.14 TYR.9
3aqlA TOT.388 # CYS.3 GLN.15 HIS.7 SER.12 ASN.14 VAL.22 LYS.20 ILE.20 PRO.20 THR.21 PHE.19 ALA.33 GLY.21 ASP.21 LEU.45 ARG.37 TRP.6 GLU.27 TYR.14 MET.11
2olvA TOT.605 # ASP.44 GLN.32 VAL.35 LYS.53 THR.35 PRO.21 HIS.16 PHE.21 ALA.50 GLY.47 ILE.27 GLU.29 LEU.39 ARG.17 TRP.5 ASN.47 TYR.38 SER.49
4co8A TOT.94 # CYS.1 MET.4 ILE.4 VAL.5 GLN.4 LYS.4 THR.2 PRO.5 HIS.1 PHE.6 ALA.9 GLY.6 ASP.4 GLU.8 LEU.11 ARG.5 TRP.3 ASN.3 TYR.6 SER.3
4d2iA TOT.464 # CYS.1 GLN.14 ILE.47 SER.34 VAL.31 LYS.33 PRO.16 THR.20 PHE.16 ALA.29 HIS.5 GLY.27 ASP.29 GLU.32 LEU.51 ARG.25 TRP.1 ASN.27 TYR.15 MET.11
1fx5A TOT.236 # CYS.3 MET.1 GLN.6 ILE.17 ASN.18 VAL.15 LYS.9 PRO.11 THR.19 PHE.18 ALA.15 HIS.3 GLY.18 ASP.13 LEU.16 ARG.6 TRP.5 GLU.10 TYR.8 SER.25
2mprA TOT.421 # CYS.2 ILE.22 SER.29 GLN.23 LYS.22 ASN.27 PRO.7 THR.29 PHE.15 ALA.32 HIS.5 GLY.46 ASP.33 LEU.21 ARG.16 TRP.20 VAL.19 GLU.20 TYR.23 MET.10
4k37A TOT.359 # CYS.18 GLN.7 ASP.17 SER.24 VAL.18 LYS.37 ASN.26 PRO.8 GLY.20 THR.13 PHE.28 ALA.11 HIS.7 MET.7 ILE.13 LEU.39 ARG.14 TRP.4 GLU.28 TYR.20
1qddA TOT.139 # CYS.6 ASP.8 SER.17 GLN.4 MET.1 ILE.3 PRO.6 LYS.9 THR.7 PHE.7 ALA.9 GLY.10 HIS.2 GLU.7 LEU.8 ARG.3 TRP.6 VAL.10 ASN.9 TYR.7
1g2nA TOT.236 # CYS.4 GLN.11 ILE.13 SER.19 ASN.7 VAL.14 LYS.9 THR.4 PRO.10 HIS.4 PHE.13 ALA.20 GLY.9 ASP.9 LEU.38 ARG.19 TRP.3 GLU.19 TYR.3 MET.8
1q23A TOT.214 # CYS.5 GLN.13 ASP.12 SER.10 VAL.16 MET.8 ASN.10 PRO.7 LYS.10 THR.13 PHE.20 ALA.14 GLY.10 HIS.12 ILE.9 LEU.13 ARG.5 TRP.5 GLU.11 TYR.11
2c4bA TOT.142 # CYS.6 GLN.3 ASP.11 SER.14 VAL.6 LYS.11 PRO.5 THR.9 PHE.5 ALA.9 HIS.1 GLY.15 ILE.9 GLU.3 LEU.9 ARG.8 TRP.3 ASN.7 TYR.7 MET.1
4o7qA TOT.89 # MET.4 ILE.7 VAL.4 GLN.5 LYS.7 THR.6 PHE.4 ALA.8 GLY.4 HIS.1 GLU.7 LEU.12 ARG.4 ASP.5 ASN.5 TYR.3 SER.3
2aqjA TOT.517 # CYS.9 GLN.18 ILE.25 SER.35 VAL.28 GLY.32 ASN.25 PRO.27 LYS.21 THR.23 PHE.32 ALA.41 MET.11 HIS.12 LEU.49 ARG.35 TRP.12 ASP.38 GLU.23 TYR.21
3ddcB TOT.133 # CYS.1 MET.3 HIS.4 GLN.7 VAL.10 LYS.13 ILE.9 PRO.8 THR.8 PHE.7 ALA.4 GLY.6 ASP.9 ASN.3 LEU.17 ARG.5 GLU.5 TYR.5 SER.9
4d90A TOT.127 # CYS.18 GLN.2 ILE.6 SER.8 VAL.6 LYS.3 PRO.12 THR.6 PHE.5 ASN.11 GLY.14 HIS.3 LEU.2 ARG.3 ASP.6 ALA.4 GLU.13 TYR.4 MET.1
3e6eA TOT.370 # CYS.6 GLN.15 HIS.11 SER.13 VAL.37 LYS.16 TRP.6 PRO.17 THR.25 PHE.11 ALA.34 GLY.31 ILE.18 GLU.33 LEU.37 ARG.18 ASP.12 ASN.11 TYR.13 MET.6
4nq8A TOT.298 # ILE.19 SER.18 GLN.16 LYS.18 ASN.9 PRO.13 THR.19 PHE.11 ALA.40 HIS.5 GLY.25 ASP.14 LEU.26 ARG.11 TRP.2 VAL.18 GLU.18 TYR.10 MET.6
3sqfA TOT.95 # ASP.7 SER.6 GLN.3 VAL.3 LYS.8 PRO.8 THR.8 PHE.2 GLU.2 GLY.6 ILE.8 LEU.13 ARG.3 TRP.5 ALA.1 ASN.9 TYR.1 MET.2
1umzA TOT.267 # CYS.5 ASP.21 SER.17 GLN.13 LYS.16 ASN.11 PRO.12 THR.14 PHE.21 ALA.13 GLY.19 HIS.6 ILE.12 LEU.15 ARG.15 TRP.9 VAL.14 GLU.11 TYR.17 MET.6
2ocpA TOT.229 # CYS.1 ASP.8 GLN.13 VAL.14 LYS.13 PRO.9 GLY.8 THR.12 PHE.14 ASN.9 HIS.8 MET.4 ILE.12 LEU.29 ARG.13 TRP.7 ALA.12 GLU.21 TYR.9 SER.13
3nvnB TOT.474 # CYS.18 ASP.20 SER.43 GLN.16 LYS.15 ASN.17 PRO.26 THR.28 PHE.13 ALA.44 HIS.12 GLY.41 ILE.15 LEU.48 ARG.30 TRP.9 VAL.30 GLU.30 TYR.16 MET.3
3nirA TOT.48 # CYS.6 ASP.1 SER.3 VAL.2 PRO.5 THR.6 PHE.1 GLU.1 GLY.4 ILE.5 LEU.2 ARG.2 ALA.5 ASN.3 TYR.2
4j42A TOT.78 # ASP.3 SER.4 GLN.8 LYS.5 ASN.4 PRO.2 THR.3 PHE.5 ALA.9 GLY.7 ILE.9 LEU.5 ARG.4 TRP.1 GLU.8 MET.1
4nfaA TOT.202 # CYS.1 ASP.13 SER.16 GLN.12 LYS.11 ASN.12 PRO.9 THR.9 PHE.13 ALA.7 HIS.5 GLY.4 ILE.12 LEU.25 ARG.5 TRP.4 VAL.17 GLU.16 TYR.9 MET.2
1r76A TOT.384 # CYS.1 GLN.19 ASP.25 SER.24 VAL.23 LYS.16 PRO.26 THR.22 PHE.10 ALA.53 HIS.8 GLY.29 ILE.16 GLU.20 LEU.31 ARG.25 TRP.11 ASN.10 TYR.11 MET.4
3pvnA TOT.206 # CYS.2 GLN.7 ILE.12 SER.21 VAL.18 LYS.13 TRP.6 PRO.11 THR.13 PHE.14 ALA.9 GLY.17 HIS.2 ASN.7 LEU.15 ARG.6 ASP.9 GLU.14 TYR.8 MET.2
4k8wA TOT.117 # GLN.3 ASP.7 SER.6 VAL.10 LYS.5 ILE.7 PRO.8 THR.7 PHE.3 ASN.6 GLY.11 HIS.3 LEU.11 ARG.7 ALA.5 GLU.7 TYR.11
3saoA TOT.133 # CYS.2 GLN.1 ASP.6 SER.12 VAL.15 MET.7 ASN.2 PRO.5 LYS.7 THR.9 PHE.5 ALA.16 HIS.1 GLY.5 ILE.4 LEU.9 ARG.8 TRP.2 GLU.9 TYR.8
4r03A TOT.105 # GLN.6 ILE.7 SER.6 VAL.6 LYS.13 PRO.2 THR.5 PHE.6 GLU.10 GLY.6 ASP.6 LEU.5 ARG.3 TRP.3 ALA.1 ASN.11 TYR.9
2np3A TOT.122 # CYS.1 GLN.3 ASP.5 SER.5 VAL.12 LYS.1 ASN.1 PRO.3 THR.12 PHE.2 ALA.23 HIS.3 GLY.12 ILE.6 LEU.14 ARG.11 TRP.1 GLU.5 TYR.2
4lvfA TOT.469 # CYS.5 ILE.29 SER.28 GLN.15 LYS.44 PRO.20 THR.29 PHE.18 ASN.24 HIS.11 GLY.36 ASP.25 LEU.44 ARG.13 TRP.7 ALA.20 VAL.37 GLU.35 TYR.27 MET.2
2ahrA TOT.250 # CYS.1 ILE.26 ASN.5 GLN.14 LYS.17 PRO.11 THR.17 PHE.9 ALA.28 HIS.4 GLY.17 ASP.13 LEU.32 ARG.6 VAL.11 GLU.11 TYR.3 SER.25
2iusA TOT.392 # CYS.1 ILE.21 GLN.9 VAL.43 MET.15 PRO.26 LYS.21 THR.18 PHE.8 ALA.39 HIS.6 GLY.23 ASP.23 GLU.21 LEU.44 ARG.27 TRP.3 ASN.13 TYR.11 SER.20
4ae2A TOT.204 # CYS.8 GLN.7 HIS.5 SER.13 VAL.14 LYS.15 ILE.7 PRO.12 THR.10 PHE.11 ALA.11 GLY.18 ASP.13 GLU.11 LEU.14 ARG.8 TRP.5 ASN.11 TYR.7 MET.4
4hn9A TOT.312 # CYS.4 ASP.15 SER.24 GLN.6 LYS.21 ASN.26 PRO.14 THR.27 PHE.11 ALA.35 HIS.1 GLY.18 ILE.17 LEU.29 ARG.3 TRP.3 VAL.27 GLU.17 TYR.14
4izuA TOT.254 # CYS.3 MET.3 ASP.13 GLN.16 VAL.22 LYS.2 PRO.21 THR.6 PHE.5 GLU.18 HIS.6 GLY.27 ILE.8 LEU.33 ARG.16 TRP.3 ALA.32 ASN.4 TYR.6 SER.10
1ef8A TOT.255 # CYS.1 GLN.8 ILE.23 SER.18 VAL.21 LYS.11 PRO.11 THR.10 PHE.12 ASN.12 HIS.8 GLY.14 ASP.13 LEU.22 ARG.13 TRP.1 ALA.20 GLU.19 TYR.7 MET.11
4hygA TOT.246 # GLN.3 ILE.19 SER.12 VAL.27 LYS.2 THR.10 PRO.14 HIS.2 PHE.14 ALA.32 GLY.26 ASP.4 GLU.3 LEU.49 ARG.5 TRP.2 ASN.4 TYR.7 MET.11
1ypfA TOT.295 # CYS.4 ILE.31 GLN.10 VAL.22 GLY.25 TRP.2 PRO.10 LYS.20 THR.18 PHE.11 ALA.24 MET.8 HIS.9 GLU.22 LEU.16 ARG.11 ASP.14 ASN.12 TYR.8 SER.18
1pdkB TOT.143 # CYS.2 GLN.1 HIS.5 SER.10 VAL.12 LYS.7 ILE.3 PRO.9 THR.14 PHE.6 ALA.12 GLY.15 ASP.5 ASN.4 LEU.16 ARG.8 TRP.1 GLU.9 TYR.4
3p6lA TOT.257 # CYS.4 GLN.13 ILE.19 SER.18 VAL.11 LYS.30 PRO.8 THR.8 PHE.11 GLU.21 HIS.7 GLY.21 ASP.15 LEU.24 ARG.5 TRP.8 ALA.13 ASN.12 TYR.9
2gfiA TOT.458 # CYS.8 ILE.28 SER.38 GLN.14 LYS.20 ASN.40 PRO.18 THR.33 PHE.22 ALA.30 GLY.33 HIS.6 LEU.31 ARG.12 TRP.2 ASP.33 VAL.24 GLU.26 TYR.34 MET.6
3iccA TOT.248 # CYS.1 ILE.22 GLN.8 VAL.12 LYS.10 ASN.16 PRO.6 THR.17 PHE.12 ALA.31 HIS.2 GLY.22 ASP.12 LEU.22 ARG.13 TRP.1 GLU.14 TYR.5 SER.22
1n40A TOT.378 # CYS.3 ILE.25 VAL.24 GLN.10 MET.7 ASN.15 PRO.30 LYS.6 THR.21 PHE.16 ALA.42 HIS.7 GLY.28 ASP.22 LEU.51 ARG.25 TRP.4 GLU.20 TYR.3 SER.19
3dm5A TOT.393 # CYS.1 GLN.15 ASP.22 SER.18 VAL.25 LYS.33 PRO.14 GLY.31 THR.19 PHE.12 GLU.35 HIS.6 MET.10 ILE.40 LEU.40 ARG.22 TRP.1 ALA.30 ASN.9 TYR.10
3fzyA TOT.215 # GLN.12 ASP.19 SER.19 VAL.20 LYS.14 ASN.19 PRO.5 THR.8 PHE.6 ALA.18 GLY.18 HIS.7 ILE.8 LEU.15 ARG.8 TRP.4 GLU.9 TYR.4 MET.2
1cuoA TOT.129 # CYS.3 HIS.5 SER.12 VAL.10 GLY.13 ILE.4 PRO.5 LYS.10 THR.13 PHE.7 GLU.8 MET.5 ASP.6 LEU.4 ARG.3 TRP.1 ALA.12 ASN.4 TYR.4
4rojA TOT.99 # CYS.1 MET.1 GLN.3 ILE.6 ASN.4 VAL.4 LYS.8 PRO.3 THR.6 PHE.5 ALA.7 HIS.4 GLY.2 ASP.6 LEU.9 ARG.4 TRP.2 GLU.10 TYR.7 SER.7
4r7oA TOT.279 # ASP.16 SER.16 VAL.12 GLN.10 LYS.28 ASN.19 PRO.12 THR.15 PHE.7 ALA.14 HIS.8 GLY.17 ILE.19 LEU.26 ARG.10 TRP.4 GLU.20 TYR.15 MET.11
1wyuB TOT.473 # CYS.2 GLN.6 ILE.13 SER.14 VAL.30 LYS.26 PRO.37 ASP.18 THR.22 PHE.17 ASN.11 GLY.44 HIS.15 LEU.63 ARG.35 TRP.4 ALA.45 GLU.42 TYR.19 MET.10
1wyuA TOT.437 # MET.9 GLN.13 ASP.11 ASN.8 VAL.34 LYS.14 PRO.33 THR.19 PHE.18 ALA.60 HIS.12 GLY.41 ILE.9 LEU.64 ARG.26 TRP.1 GLU.43 TYR.11 SER.11
3mydA TOT.335 # ILE.37 SER.16 GLN.13 MET.9 PRO.14 LYS.23 THR.19 PHE.11 ALA.23 HIS.5 GLY.19 ASP.18 GLU.29 LEU.43 ARG.13 TRP.1 VAL.21 ASN.15 TYR.6
3ci0J TOT.146 # ASP.6 GLN.12 VAL.10 LYS.3 PRO.11 THR.8 PHE.3 ALA.10 HIS.3 GLY.13 ILE.5 GLU.7 LEU.20 ARG.14 TRP.5 ASN.3 TYR.3 SER.10
2z5dA TOT.152 # CYS.1 GLN.5 ILE.11 SER.6 VAL.9 LYS.13 ASN.7 PRO.13 ASP.9 THR.8 PHE.7 ALA.8 GLY.10 HIS.3 LEU.13 ARG.4 TRP.2 GLU.11 TYR.9 MET.3
3ci0I TOT.81 # HIS.2 SER.8 GLN.7 LYS.1 ILE.2 PRO.1 THR.6 PHE.2 ALA.9 GLY.5 ASP.3 GLU.6 LEU.7 ARG.7 TRP.4 VAL.7 ASN.2 TYR.2
1ihnA TOT.108 # CYS.3 ILE.8 SER.11 VAL.10 LYS.4 ASN.1 PRO.3 THR.7 PHE.3 ALA.7 HIS.5 GLY.9 ASP.3 LEU.5 ARG.12 GLU.13 TYR.4
1tz9A TOT.334 # CYS.4 ASP.22 GLN.14 VAL.20 LYS.16 ASN.12 PRO.16 THR.15 PHE.11 ALA.26 HIS.10 GLY.30 ILE.25 LEU.35 ARG.17 TRP.7 GLU.28 TYR.14 SER.12
1jmxB TOT.339 # CYS.3 GLN.7 ASP.26 SER.15 VAL.26 GLY.23 ILE.10 PRO.23 LYS.24 THR.25 PHE.14 ALA.25 MET.10 HIS.9 GLU.9 LEU.31 ARG.15 TRP.2 ASN.18 TYR.24
1jmxA TOT.493 # CYS.4 GLN.26 HIS.9 SER.19 VAL.41 LYS.29 TRP.11 PRO.28 THR.20 PHE.14 GLU.36 GLY.52 ILE.13 LEU.38 ARG.31 ASP.27 ALA.54 ASN.18 TYR.10 MET.13
1ro7A TOT.255 # CYS.6 ILE.19 GLN.10 VAL.6 LYS.26 PRO.8 THR.8 PHE.23 ALA.14 GLY.10 HIS.6 GLU.15 LEU.24 ARG.3 ASP.13 ASN.25 TYR.24 SER.15
1h80A TOT.432 # CYS.8 MET.7 ASP.33 GLN.16 VAL.32 LYS.28 PRO.13 THR.25 PHE.24 ALA.24 HIS.7 GLY.35 ILE.27 GLU.14 LEU.27 ARG.22 TRP.4 ASN.37 TYR.16 SER.33
3qwlA TOT.251 # CYS.7 ILE.11 SER.20 GLN.9 GLY.7 PRO.16 LYS.15 THR.9 PHE.12 GLU.12 HIS.8 MET.8 ASP.14 LEU.36 ARG.10 TRP.5 ALA.17 VAL.22 ASN.4 TYR.9
1vprA TOT.323 # CYS.8 ILE.9 SER.13 GLN.9 LYS.19 ASN.14 PRO.25 THR.15 PHE.19 ALA.25 HIS.9 GLY.41 ASP.19 LEU.27 ARG.14 TRP.5 VAL.18 GLU.19 TYR.15
3nrkA TOT.277 # CYS.1 GLN.10 ASP.14 SER.20 VAL.15 LYS.12 PRO.15 THR.11 PHE.11 ASN.13 HIS.3 GLY.12 ILE.31 LEU.20 ARG.23 TRP.4 ALA.16 GLU.30 TYR.10 MET.6
1ub7A TOT.320 # CYS.1 MET.4 ASP.20 GLN.4 VAL.29 LYS.11 ILE.13 PRO.11 THR.18 PHE.12 ALA.52 GLY.31 HIS.5 ASN.9 LEU.34 ARG.22 TRP.6 GLU.20 TYR.9 SER.9
3ehdA TOT.156 # GLN.9 ILE.11 SER.8 VAL.10 LYS.8 PRO.4 HIS.2 THR.6 ALA.19 GLY.8 ASP.13 GLU.10 LEU.22 ARG.5 ASN.9 TYR.9 PHE.3
3gzsA TOT.464 # CYS.1 GLN.14 ILE.25 SER.32 VAL.29 LYS.22 PRO.18 THR.22 PHE.18 ALA.49 HIS.4 GLY.41 ASP.25 GLU.30 LEU.31 ARG.23 TRP.10 ASN.38 TYR.32
1z7hA TOT.426 # CYS.4 GLN.16 HIS.6 SER.29 VAL.19 LYS.30 ILE.39 PRO.22 GLY.21 THR.22 PHE.23 GLU.23 MET.12 ASP.33 LEU.34 ARG.12 TRP.1 ALA.14 ASN.39 TYR.27
3odpA TOT.366 # CYS.5 GLN.7 ILE.33 SER.31 VAL.20 LYS.22 TRP.1 PRO.11 THR.18 PHE.16 GLU.31 GLY.23 HIS.6 LEU.43 ARG.8 ASP.21 ALA.27 ASN.24 TYR.19
4qbbA TOT.158 # CYS.4 GLN.3 ASP.12 SER.7 VAL.11 LYS.5 ILE.7 PRO.11 THR.9 PHE.9 GLU.13 GLY.10 HIS.6 LEU.17 ARG.3 TRP.5 ALA.9 ASN.8 TYR.7 MET.2
3dwaA TOT.116 # CYS.4 GLN.5 ILE.5 SER.14 VAL.7 LYS.6 PRO.6 THR.12 PHE.7 ALA.7 HIS.1 GLY.11 ASP.4 GLU.4 LEU.5 ARG.3 TRP.3 ASN.5 TYR.7
4p47A TOT.320 # ASP.15 GLN.15 VAL.24 MET.7 ASN.18 PRO.15 LYS.23 THR.23 PHE.14 ALA.29 HIS.3 GLY.24 ILE.16 LEU.31 ARG.13 TRP.2 GLU.29 TYR.8 SER.11
3s9kA TOT.114 # CYS.2 GLN.2 ILE.8 SER.8 VAL.7 LYS.9 ASN.5 PRO.6 THR.8 PHE.3 ALA.4 GLY.8 HIS.4 LEU.8 ARG.7 TRP.1 ASP.6 GLU.7 TYR.10 MET.1
1o6dA TOT.146 # CYS.1 GLN.1 HIS.5 SER.6 VAL.11 LYS.13 ASN.2 PRO.3 THR.6 PHE.11 ALA.5 GLY.12 ILE.16 LEU.13 ARG.11 ASP.6 GLU.17 TYR.2 MET.5
3lucA TOT.135 # CYS.6 ILE.7 SER.4 GLN.12 LYS.11 ASN.4 PRO.7 THR.10 PHE.5 ALA.9 HIS.3 GLY.10 ASP.3 LEU.11 ARG.6 TRP.1 VAL.14 GLU.5 TYR.3 MET.4
3ahpA TOT.106 # CYS.5 ILE.13 VAL.6 GLN.8 MET.3 PRO.9 LYS.4 THR.7 PHE.3 ALA.10 HIS.2 GLY.4 ASP.5 GLU.7 LEU.6 ARG.1 TRP.2 ASN.3 TYR.4 SER.4
2j6lA TOT.494 # CYS.9 ILE.36 GLN.15 VAL.44 LYS.24 LEU.38 PHE.15 PRO.20 THR.26 TRP.11 ASN.24 GLY.57 HIS.7 SER.27 ARG.23 ASP.17 ALA.43 GLU.36 TYR.14 MET.8
4e74A TOT.92 # CYS.3 ILE.6 SER.6 GLN.5 GLY.3 ASN.3 PRO.6 LYS.7 THR.6 PHE.1 ALA.6 HIS.2 MET.2 ASP.7 LEU.9 ARG.3 TRP.1 VAL.11 GLU.3 TYR.2
4h11A TOT.102 # CYS.1 ASP.6 SER.8 VAL.8 LYS.3 THR.4 PRO.5 HIS.2 PHE.4 GLU.10 GLY.12 ILE.11 LEU.7 ARG.9 ALA.7 ASN.4 TYR.1
2orwA TOT.171 # CYS.5 GLN.3 HIS.4 SER.7 VAL.17 LYS.17 ILE.10 PRO.5 GLY.13 THR.13 PHE.8 ALA.9 MET.3 ASP.9 ASN.4 LEU.16 ARG.6 GLU.16 TYR.6
4ms4A TOT.408 # CYS.5 ASP.26 SER.31 GLN.14 LYS.26 PRO.19 GLY.24 THR.27 PHE.19 GLU.27 HIS.7 MET.9 ILE.25 LEU.32 ARG.21 TRP.11 ALA.29 VAL.22 ASN.16 TYR.18
4ms4B TOT.408 # CYS.6 GLN.19 ASP.22 SER.26 VAL.26 LYS.26 PRO.21 THR.23 PHE.19 ASN.21 HIS.6 GLY.30 ILE.26 LEU.33 ARG.20 TRP.7 ALA.24 GLU.25 TYR.19 MET.9
1je0A TOT.226 # CYS.2 GLN.3 ASP.8 SER.16 VAL.23 MET.3 PRO.6 LYS.14 THR.16 PHE.9 ASN.13 HIS.2 GLY.20 ILE.10 LEU.25 ARG.8 TRP.2 ALA.19 GLU.16 TYR.11
2nraC TOT.238 # GLN.5 ASP.11 SER.19 VAL.8 LYS.25 ASN.9 PRO.8 THR.11 PHE.11 ALA.17 HIS.4 GLY.10 ILE.21 LEU.31 ARG.12 TRP.1 GLU.21 TYR.12 MET.2
4eeiA TOT.414 # CYS.5 GLN.11 ILE.38 SER.29 VAL.28 LYS.30 ASN.10 PRO.9 THR.19 PHE.21 ALA.31 HIS.13 GLY.16 ASP.28 LEU.34 ARG.27 TRP.2 GLU.37 TYR.12 MET.14
1q6wA TOT.149 # ASP.9 VAL.15 GLN.5 LYS.10 ASN.3 PRO.6 THR.11 PHE.11 ALA.12 HIS.1 GLY.9 ILE.14 LEU.13 ARG.6 TRP.1 GLU.10 TYR.5 SER.8
2xvoA TOT.184 # CYS.1 GLN.9 ILE.17 SER.13 VAL.19 LYS.15 PRO.6 THR.13 PHE.14 ALA.6 GLY.7 ASP.10 GLU.8 LEU.9 ARG.4 TRP.1 ASN.23 TYR.6 MET.3
4nspA TOT.237 # CYS.8 MET.4 ASP.12 VAL.27 GLN.9 LYS.8 ASN.3 PRO.11 THR.8 PHE.9 ALA.17 GLY.17 HIS.8 ILE.5 LEU.33 ARG.21 TRP.2 GLU.15 TYR.3 SER.17
3ebvA TOT.285 # CYS.4 GLN.13 ASP.17 SER.23 VAL.25 LYS.13 PRO.10 THR.26 PHE.9 ALA.38 HIS.3 GLY.31 ILE.10 GLU.4 LEU.21 ARG.5 TRP.4 ASN.17 TYR.12
2e0qA TOT.104 # CYS.2 GLN.1 ASP.8 SER.5 VAL.8 LYS.4 THR.1 PRO.7 HIS.2 PHE.6 GLU.12 GLY.6 ILE.12 LEU.9 ARG.3 TRP.2 ALA.9 ASN.4 TYR.2 MET.1
2hykA TOT.237 # ASP.18 SER.14 GLN.12 MET.5 ILE.9 PRO.19 LYS.1 THR.16 PHE.11 GLU.11 GLY.29 HIS.7 LEU.10 ARG.10 TRP.11 ALA.17 VAL.14 ASN.13 TYR.10
3obfA TOT.168 # CYS.2 GLN.5 HIS.3 SER.15 VAL.18 LYS.4 PRO.6 ASP.5 THR.9 PHE.3 ALA.20 GLY.12 ILE.4 GLU.17 LEU.17 ARG.14 TRP.2 ASN.8 TYR.4
2gcoA TOT.187 # CYS.4 MET.4 ILE.11 GLN.6 VAL.16 LYS.13 PRO.11 THR.8 PHE.7 GLU.17 HIS.5 GLY.11 ASP.14 LEU.15 ARG.11 TRP.2 ALA.12 ASN.5 TYR.5 SER.10
3umhA TOT.180 # HIS.10 GLN.16 VAL.15 LYS.14 ASN.7 PRO.6 THR.4 PHE.4 ALA.19 MET.8 ASP.6 ILE.5 LEU.16 ARG.18 TRP.1 GLU.22 TYR.4 SER.5
2y9uA TOT.67 # CYS.3 ASP.5 SER.7 GLN.4 LYS.2 ILE.6 PRO.1 THR.5 PHE.4 ALA.3 GLY.3 HIS.4 LEU.8 ARG.3 TRP.1 VAL.1 GLU.3 TYR.3 MET.1
3hv8A TOT.242 # CYS.2 MET.1 ASP.9 VAL.14 GLN.23 LYS.11 ASN.8 PRO.11 THR.8 PHE.11 ALA.25 GLY.13 HIS.7 ILE.14 LEU.38 ARG.5 TRP.3 GLU.15 TYR.6 SER.18
2hcfA TOT.217 # CYS.1 GLN.1 ASP.18 SER.13 VAL.11 LYS.8 ILE.15 PRO.5 THR.14 PHE.11 ALA.23 GLY.16 HIS.5 GLU.19 LEU.28 ARG.17 ASN.7 TYR.5
3zzhA TOT.290 # CYS.2 HIS.4 GLN.13 VAL.22 MET.5 TRP.1 PRO.8 LYS.20 THR.17 PHE.8 ALA.21 GLY.23 ILE.25 GLU.20 LEU.32 ARG.12 ASP.14 ASN.13 TYR.11 SER.19
3h05A TOT.150 # CYS.2 GLN.3 ILE.15 SER.12 VAL.9 MET.3 PRO.8 LYS.11 THR.11 PHE.9 ALA.10 HIS.2 GLY.5 ASP.9 GLU.9 LEU.16 ARG.5 TRP.1 ASN.5 TYR.5
2x7iA TOT.295 # CYS.1 MET.5 ILE.22 ASN.11 GLN.7 LYS.25 TRP.3 PRO.10 THR.17 PHE.8 ALA.31 GLY.28 HIS.12 LEU.28 ARG.7 ASP.13 VAL.22 GLU.19 TYR.7 SER.19
4jdeA TOT.144 # ASP.11 GLN.7 VAL.11 LYS.13 ILE.8 PRO.3 GLY.9 THR.19 PHE.9 ALA.5 MET.3 HIS.6 ASN.4 LEU.4 ARG.5 TRP.3 GLU.8 TYR.4 SER.12
4jdeB TOT.143 # GLN.8 ILE.6 SER.8 VAL.15 LYS.14 ASN.6 PRO.3 ASP.10 THR.13 PHE.5 ALA.7 GLY.10 HIS.8 LEU.8 ARG.4 TRP.5 GLU.10 TYR.3
2essA TOT.230 # CYS.5 ILE.18 SER.15 GLN.4 LYS.10 ASN.15 PRO.8 HIS.7 PHE.15 ALA.13 GLY.14 ASP.14 LEU.16 ARG.13 TRP.3 THR.11 VAL.20 GLU.17 TYR.12
3df8A TOT.105 # CYS.1 ASP.6 SER.14 GLN.3 LYS.4 PRO.3 THR.7 PHE.1 ALA.2 HIS.1 GLY.8 ILE.12 GLU.4 LEU.14 ARG.9 VAL.5 ASN.7 TYR.4
3erwA TOT.131 # CYS.2 ILE.11 SER.8 GLN.7 LYS.14 ASN.6 PRO.10 THR.10 PHE.7 ALA.5 HIS.3 GLY.5 ASP.5 LEU.11 TRP.3 VAL.9 GLU.13 TYR.2
1hi9A TOT.274 # CYS.4 GLN.6 ILE.10 SER.16 VAL.21 LYS.15 TRP.1 PRO.13 THR.18 PHE.11 ALA.26 GLY.19 HIS.5 GLU.19 LEU.24 ARG.13 ASP.16 ASN.12 TYR.10 MET.15
2ze7A TOT.226 # CYS.5 ILE.17 SER.15 GLN.10 MET.4 PRO.12 LYS.6 THR.7 PHE.7 ALA.21 HIS.6 GLY.13 ASP.13 GLU.20 LEU.27 ARG.21 TRP.6 VAL.7 ASN.4 TYR.5
1t9fA TOT.178 # CYS.4 GLN.9 HIS.10 SER.20 VAL.11 LYS.10 ASN.7 PRO.3 THR.11 PHE.8 ALA.11 GLY.19 ASP.13 ILE.9 LEU.11 ARG.6 TRP.4 GLU.9 TYR.3
2z72A TOT.338 # CYS.2 ASP.23 SER.20 GLN.16 LYS.19 ASN.20 PRO.7 THR.21 PHE.11 ALA.15 GLY.27 HIS.12 ILE.23 LEU.39 ARG.15 TRP.6 VAL.21 GLU.19 TYR.14 MET.8
2ofcA TOT.141 # PRO.2 CYS.1 GLN.6 HIS.5 SER.5 VAL.10 MET.2 TRP.3 LYS.7 THR.15 PHE.6 ALA.10 GLY.12 ILE.7 GLU.10 LEU.6 ARG.7 ASP.6 ASN.13 TYR.8
4tpwA TOT.185 # CYS.4 ASP.14 SER.11 GLN.6 LYS.15 ILE.11 PRO.5 THR.11 PHE.8 ALA.9 GLY.11 HIS.5 GLU.10 LEU.17 ARG.12 TRP.8 VAL.10 ASN.10 TYR.6 MET.2
1xd5A TOT.112 # CYS.2 GLN.5 ASP.7 SER.9 VAL.7 LYS.2 THR.5 PHE.1 ALA.8 HIS.2 GLY.12 ILE.7 GLU.1 LEU.10 ARG.6 TRP.3 ASN.18 TYR.6 MET.1
4tymA TOT.223 # ASP.15 VAL.15 GLN.6 LYS.10 THR.15 PRO.8 HIS.7 PHE.9 ALA.25 GLY.15 ILE.19 ASN.14 LEU.19 ARG.9 TRP.1 GLU.16 TYR.8 SER.12
3i09A TOT.356 # CYS.2 ILE.16 VAL.24 GLN.16 LYS.32 ASN.12 PRO.7 THR.26 PHE.12 ALA.49 HIS.5 GLY.33 ASP.26 LEU.28 ARG.8 TRP.7 GLU.14 TYR.16 SER.23
1m56D TOT.42 # ILE.3 SER.1 GLN.2 VAL.6 LYS.1 ASP.1 THR.3 PHE.3 ALA.9 GLY.3 HIS.1 GLU.1 LEU.3 ARG.1 TRP.1 ASN.1 MET.2
4ie5A TOT.412 # CYS.13 MET.9 ILE.18 VAL.24 GLN.23 LYS.15 PRO.21 ASP.26 THR.21 PHE.15 GLU.32 GLY.19 HIS.14 LEU.48 ARG.20 TRP.12 ALA.32 ASN.15 TYR.14 SER.21
1m56C TOT.265 # CYS.3 GLN.3 HIS.16 SER.12 VAL.22 LYS.3 ASN.6 PRO.13 ARG.6 GLY.25 THR.10 PHE.27 ALA.25 MET.9 ILE.20 LEU.26 ASP.7 TRP.15 GLU.9 TYR.8
2yd1A TOT.196 # CYS.4 MET.3 ILE.13 VAL.18 GLN.8 LYS.12 PRO.15 THR.13 PHE.3 GLU.13 HIS.3 GLY.20 ASP.9 LEU.7 ARG.11 TRP.2 ALA.13 ASN.10 TYR.8 SER.11
3r5eA TOT.360 # CYS.1 MET.6 ILE.21 GLN.11 VAL.32 LYS.14 PRO.11 THR.18 PHE.11 ALA.54 HIS.4 GLY.23 ASP.27 GLU.26 LEU.30 ARG.15 TRP.4 ASN.14 TYR.8 SER.30
2xnsC TOT.39 # GLN.2 ASP.4 SER.3 VAL.3 ILE.1 PHE.2 ASN.2 GLY.3 HIS.1 LEU.6 ARG.5 TRP.1 ALA.2 GLU.4
2ew0A TOT.173 # CYS.3 ILE.17 SER.5 GLN.6 LYS.5 PRO.8 ASP.18 THR.7 PHE.4 ALA.18 GLY.14 HIS.6 GLU.10 LEU.16 ARG.8 TRP.5 VAL.8 ASN.9 TYR.6
3k7qX TOT.425 # CYS.3 GLN.12 ASP.28 SER.24 VAL.39 LYS.10 PRO.22 THR.16 PHE.15 GLU.32 HIS.15 GLY.40 ILE.23 LEU.45 ARG.25 TRP.6 ALA.43 ASN.9 TYR.13 MET.5
3c5rA TOT.125 # CYS.1 GLN.3 HIS.9 SER.8 VAL.9 LYS.7 ILE.5 PRO.7 THR.6 PHE.2 ASN.9 GLY.9 ASP.9 LEU.19 ARG.3 TRP.1 ALA.8 GLU.5 TYR.4 MET.1
3lw6A TOT.241 # CYS.4 HIS.14 GLN.11 VAL.18 LYS.15 ILE.12 ASN.15 GLY.13 THR.10 PHE.15 ALA.9 MET.7 ASP.19 LEU.25 ARG.16 TRP.3 PRO.10 GLU.8 TYR.9 SER.8
3mjeA TOT.470 # CYS.2 GLN.12 HIS.17 SER.21 VAL.33 MET.7 ILE.8 PRO.23 LYS.3 THR.25 PHE.7 ALA.90 GLY.51 ASP.31 GLU.25 LEU.66 ARG.32 TRP.10 ASN.4 TYR.3
1wvhA TOT.132 # CYS.3 MET.2 GLN.5 HIS.3 ASN.6 VAL.12 LYS.7 ILE.5 PRO.8 THR.13 PHE.9 ALA.14 GLY.6 ASP.8 LEU.11 ARG.6 TRP.1 GLU.5 TYR.1 SER.7
4nkdD TOT.115 # CYS.2 ASP.5 SER.17 GLN.6 GLY.13 PRO.7 LYS.6 THR.7 PHE.5 ASN.3 HIS.1 MET.1 ILE.6 LEU.11 ARG.5 TRP.1 ALA.3 VAL.7 GLU.4 TYR.5
1edzA TOT.314 # CYS.6 GLN.9 ILE.19 SER.15 VAL.28 LYS.25 ASN.26 PRO.11 THR.15 PHE.11 ALA.18 HIS.5 GLY.18 ASP.17 LEU.33 ARG.12 TRP.1 GLU.23 TYR.16 MET.6
3rhzA TOT.330 # CYS.5 ASP.19 SER.16 GLN.17 LYS.22 ILE.24 ASN.19 THR.15 PHE.16 ALA.13 GLY.20 HIS.6 LEU.28 ARG.13 TRP.6 PRO.13 VAL.30 GLU.21 TYR.15 MET.12
2cjpA TOT.320 # CYS.1 HIS.14 GLN.6 VAL.28 LYS.23 ASN.11 PRO.21 GLY.24 THR.9 PHE.18 ALA.29 MET.4 ASP.13 ILE.19 LEU.30 ARG.10 TRP.7 GLU.26 TYR.15 SER.12
4iobA TOT.161 # GLN.4 HIS.4 SER.11 VAL.6 MET.4 ILE.11 PRO.5 LYS.2 THR.6 PHE.5 ALA.25 GLY.10 ASP.13 ASN.6 LEU.22 ARG.17 GLU.8 TYR.2
1tazA TOT.321 # CYS.5 GLN.16 HIS.15 SER.21 VAL.24 MET.8 ILE.20 PRO.9 LYS.18 THR.24 PHE.19 ALA.24 GLY.8 ASP.19 ASN.13 LEU.34 ARG.14 TRP.5 GLU.19 TYR.6
3l0zA TOT.338 # CYS.3 GLN.2 ILE.34 SER.20 VAL.30 LYS.36 PRO.16 THR.18 PHE.12 GLU.25 GLY.34 HIS.3 LEU.31 ARG.7 ASP.14 ALA.24 ASN.20 TYR.9
1khvA TOT.493 # CYS.16 GLN.14 ASP.35 SER.32 VAL.38 LYS.34 ASN.15 PRO.22 THR.25 PHE.18 ALA.42 HIS.11 GLY.28 ILE.25 LEU.49 ARG.25 TRP.7 GLU.25 TYR.20 MET.12
4ghnA TOT.373 # CYS.6 GLN.22 ILE.26 ASN.17 VAL.21 LYS.20 PRO.19 THR.31 PHE.17 ALA.24 HIS.7 GLY.21 ASP.27 LEU.28 ARG.19 TRP.1 GLU.23 TYR.27 SER.17
3crrA TOT.236 # CYS.1 GLN.9 ASP.12 SER.13 VAL.8 LYS.7 ASN.1 PRO.12 THR.10 PHE.5 ALA.37 HIS.6 GLY.14 ILE.14 LEU.33 ARG.21 TRP.4 GLU.11 TYR.10 MET.8
3ktsA TOT.185 # CYS.3 ILE.19 GLN.13 VAL.12 LYS.15 THR.8 PRO.7 GLY.11 HIS.7 PHE.3 ALA.17 MET.7 ASP.9 GLU.10 LEU.21 ARG.2 TRP.1 ASN.8 TYR.4 SER.8
3etiA TOT.168 # CYS.3 GLN.3 ASP.11 SER.8 VAL.20 LYS.14 PRO.5 THR.7 PHE.9 ALA.11 HIS.2 GLY.14 ILE.9 GLU.8 LEU.20 ARG.7 ASN.11 TYR.5 MET.1
4mobA TOT.319 # CYS.5 ASP.16 SER.20 GLN.13 VAL.29 LYS.18 THR.23 PRO.9 HIS.11 PHE.17 ALA.31 GLY.18 ILE.21 GLU.23 LEU.21 ARG.20 TRP.4 ASN.10 TYR.2 MET.8
2dskA TOT.300 # CYS.1 MET.7 ASP.20 GLN.9 VAL.22 LYS.16 THR.15 PRO.20 HIS.6 PHE.17 ALA.25 GLY.23 ILE.22 ASN.10 LEU.21 ARG.9 TRP.8 GLU.20 TYR.14 SER.15
3kusA TOT.82 # HIS.3 SER.6 GLN.7 LYS.5 ILE.3 PRO.5 GLY.3 THR.3 PHE.1 ALA.12 MET.5 ASP.2 ASN.1 LEU.13 ARG.2 VAL.3 GLU.8
4m7oA TOT.236 # GLN.6 ILE.23 SER.19 VAL.19 LYS.26 TRP.1 PRO.8 THR.11 PHE.7 GLU.16 GLY.15 HIS.4 LEU.16 ARG.9 ASP.28 ALA.9 ASN.11 TYR.8
3hpaA TOT.428 # CYS.6 GLN.11 ILE.16 SER.19 VAL.38 MET.13 ASN.12 PRO.20 LYS.8 THR.23 PHE.9 ALA.58 HIS.18 GLY.33 ASP.29 LEU.49 ARG.29 TRP.4 GLU.22 TYR.11
3hywA TOT.427 # CYS.5 ILE.35 SER.14 GLN.7 LYS.31 ASN.22 PRO.34 ARG.14 THR.21 PHE.26 ALA.39 GLY.34 HIS.9 LEU.25 TRP.4 ASP.17 VAL.34 GLU.30 TYR.14 MET.12
4od8A TOT.220 # CYS.4 GLN.6 ASP.14 SER.17 VAL.16 LYS.17 PRO.14 THR.12 PHE.9 ASN.11 HIS.6 GLY.10 ILE.20 LEU.18 ARG.8 TRP.5 ALA.8 GLU.11 TYR.12 MET.2
4od8C TOT.50 # GLN.1 ASP.2 SER.8 VAL.3 LYS.5 THR.3 PHE.1 GLU.3 GLY.2 ILE.2 LEU.7 ARG.1 TRP.2 ALA.4 ASN.2 TYR.3 MET.1
3oy2A TOT.392 # CYS.9 GLN.3 ASP.32 SER.29 VAL.39 LYS.25 THR.11 PRO.10 HIS.13 PHE.20 ALA.24 GLY.27 ILE.37 GLU.17 LEU.26 ARG.20 TRP.5 ASN.20 TYR.15 MET.10
3wdsA TOT.257 # CYS.4 ASP.16 VAL.28 GLN.6 GLY.23 THR.13 PRO.7 LYS.10 HIS.2 PHE.12 ALA.44 MET.8 ILE.14 GLU.14 LEU.17 ARG.14 TRP.3 ASN.10 TYR.2 SER.10
4xauA TOT.372 # CYS.5 GLN.5 ILE.12 SER.20 VAL.30 LYS.7 ASN.7 PRO.17 ASP.29 THR.19 PHE.11 ALA.38 GLY.31 HIS.14 LEU.44 ARG.33 TRP.9 GLU.24 TYR.9 MET.8
4g4pA TOT.235 # GLN.10 ILE.13 SER.11 VAL.11 LYS.31 PRO.5 THR.10 PHE.13 ALA.18 HIS.2 GLY.23 ASP.26 GLU.12 LEU.20 ARG.1 ASN.13 TYR.13 MET.3
3kepA TOT.130 # CYS.2 ILE.8 GLN.4 VAL.11 LYS.5 TRP.2 PRO.8 THR.10 PHE.12 ALA.6 GLY.9 HIS.3 GLU.8 LEU.9 ARG.7 ASP.5 ASN.6 TYR.6 SER.9
1vmaA TOT.279 # CYS.1 MET.3 ILE.21 VAL.28 GLN.5 LYS.23 ASN.6 PRO.10 HIS.4 PHE.13 ALA.28 GLY.24 ASP.18 LEU.32 ARG.9 TRP.1 THR.20 GLU.26 TYR.1 SER.6
4pddA TOT.301 # CYS.2 GLN.17 ASP.16 SER.16 VAL.24 LYS.24 ASN.8 PRO.14 THR.19 PHE.14 ALA.29 GLY.25 HIS.7 ILE.14 LEU.23 ARG.13 TRP.2 GLU.19 TYR.7 MET.8
3rkxA TOT.305 # CYS.3 ILE.29 SER.26 GLN.22 LYS.20 PRO.5 THR.10 PHE.16 ASN.18 HIS.6 GLY.16 ASP.23 LEU.32 ARG.12 TRP.4 ALA.16 VAL.14 GLU.18 TYR.12 MET.3
4n7iA TOT.187 # CYS.4 GLN.3 ASP.12 SER.9 VAL.14 LYS.14 ILE.8 PRO.14 THR.12 PHE.9 GLU.14 GLY.12 HIS.5 LEU.16 ARG.9 TRP.6 ALA.9 ASN.8 TYR.7 MET.2
4dzhA TOT.439 # CYS.8 GLN.17 ASP.32 SER.15 VAL.43 LYS.6 ASN.15 PRO.23 THR.25 PHE.12 ALA.67 HIS.17 GLY.25 ILE.19 LEU.45 ARG.27 TRP.6 GLU.21 TYR.7 MET.9
3ny4A TOT.265 # CYS.3 GLN.7 ILE.10 SER.9 VAL.18 LYS.5 ASN.6 PRO.15 THR.23 PHE.6 ALA.40 HIS.4 GLY.24 ASP.23 LEU.27 ARG.19 TRP.3 GLU.11 TYR.9 MET.3
2zxeG TOT.39 # CYS.1 ILE.5 ASN.1 VAL.5 LYS.1 PRO.1 THR.1 PHE.1 ALA.3 GLY.4 ASP.3 LEU.5 ARG.3 GLU.2 TYR.3
4e8dA TOT.590 # CYS.7 HIS.13 SER.26 GLN.22 LYS.35 ILE.29 PRO.30 THR.29 PHE.33 ALA.29 GLY.47 ASP.36 GLU.52 LEU.65 ARG.28 TRP.14 VAL.24 ASN.23 TYR.34 MET.14
3f3zA TOT.265 # CYS.4 ILE.15 SER.16 GLN.8 LYS.19 ASN.7 PRO.16 THR.14 PHE.12 ALA.14 GLY.14 HIS.5 LEU.28 ARG.16 TRP.4 ASP.14 VAL.18 GLU.22 TYR.11 MET.8
2zxeA TOT.992 # CYS.23 ASP.57 VAL.70 GLN.31 LYS.46 ILE.85 PRO.43 GLY.73 THR.61 PHE.46 ALA.79 MET.23 HIS.14 GLU.63 LEU.91 ARG.47 TRP.12 ASN.40 TYR.24 SER.64
1ddjA TOT.247 # CYS.12 GLN.9 ILE.10 SER.15 VAL.24 LYS.13 ASN.8 PRO.18 ASP.7 THR.13 PHE.9 ALA.14 GLY.25 HIS.7 LEU.21 ARG.13 TRP.6 GLU.16 TYR.5 MET.2
1irxA TOT.507 # CYS.3 MET.9 HIS.15 GLN.6 VAL.40 LYS.37 ASN.15 PRO.26 THR.6 PHE.22 ALA.24 GLY.32 ILE.34 LEU.44 ARG.41 TRP.15 ASP.25 GLU.66 TYR.24 SER.23
3cxeC TOT.98 # CYS.2 ILE.4 VAL.7 GLN.5 LYS.5 ASN.9 PRO.6 ASP.4 THR.6 PHE.3 ALA.4 GLY.3 HIS.3 LEU.8 ARG.8 TRP.3 GLU.5 TYR.4 SER.9
4uoxA TOT.453 # CYS.9 ASP.15 VAL.29 GLN.18 GLY.39 ASN.19 PRO.22 LYS.24 THR.26 PHE.24 ALA.54 MET.13 HIS.9 ILE.20 LEU.52 ARG.19 TRP.1 GLU.34 TYR.8 SER.18
3cyjA TOT.353 # CYS.6 GLN.8 ASP.21 SER.18 VAL.27 GLY.42 ILE.11 PRO.22 LYS.9 THR.12 PHE.7 ALA.46 MET.5 HIS.9 ASN.2 LEU.38 ARG.27 TRP.6 GLU.25 TYR.12
1kzyC TOT.232 # CYS.9 GLN.19 ILE.10 SER.14 VAL.16 LYS.10 PHE.9 PRO.12 HIS.10 THR.8 ASN.11 GLY.11 ASP.9 LEU.29 ARG.8 TRP.4 ALA.18 GLU.13 TYR.10 MET.2
4jpbW TOT.140 # GLN.3 ASP.12 SER.7 VAL.17 LYS.13 ASN.5 PRO.3 THR.6 PHE.7 ALA.4 HIS.1 GLY.8 ILE.18 LEU.14 ARG.7 GLU.12 TYR.1 MET.2
3u7qA TOT.477 # CYS.9 MET.16 HIS.11 ASN.15 GLN.11 LYS.37 ILE.36 PRO.20 THR.19 PHE.19 ALA.26 GLY.44 ASP.30 LEU.28 ARG.25 TRP.9 VAL.33 GLU.38 TYR.21 SER.30
3u7qB TOT.522 # CYS.8 GLN.19 ASP.36 SER.25 VAL.34 MET.20 ASN.21 PRO.26 LYS.39 THR.32 PHE.30 ALA.29 HIS.16 GLY.39 ILE.23 LEU.45 ARG.21 TRP.9 GLU.33 TYR.17
3bidA TOT.57 # CYS.1 GLN.3 ASP.2 SER.2 VAL.3 LYS.6 ILE.3 PRO.1 THR.4 PHE.1 ALA.7 GLY.3 HIS.2 GLU.6 LEU.4 ARG.2 TRP.1 ASN.2 TYR.4
4narA TOT.411 # CYS.3 GLN.5 ILE.31 SER.16 VAL.31 LYS.35 ASN.15 PRO.18 THR.19 PHE.25 ALA.24 HIS.14 GLY.31 ASP.23 LEU.34 ARG.21 TRP.5 GLU.44 TYR.17
2fh5B TOT.188 # CYS.3 GLN.12 ASP.11 SER.17 VAL.13 LYS.16 ASN.7 PRO.4 THR.8 PHE.10 ALA.17 GLY.7 HIS.1 ILE.9 LEU.27 ARG.10 TRP.1 GLU.10 TYR.3 MET.2
1k8wA TOT.292 # CYS.3 GLN.10 ASP.18 SER.15 VAL.21 LYS.12 ILE.18 PRO.17 THR.14 PHE.6 ALA.23 GLY.24 HIS.5 GLU.23 LEU.35 ARG.21 ASN.7 TYR.13 MET.7
1ibyA TOT.112 # CYS.1 ASP.4 GLN.2 VAL.16 LYS.9 ILE.9 PRO.5 THR.9 PHE.6 ALA.8 GLY.7 HIS.3 ASN.10 LEU.6 ARG.1 TRP.1 GLU.10 TYR.1 SER.4
2zbtA TOT.276 # CYS.1 GLN.4 ASP.14 ASN.4 VAL.29 GLY.27 PRO.12 LYS.15 THR.9 PHE.11 ALA.38 HIS.8 MET.15 ILE.20 LEU.13 ARG.17 TRP.3 GLU.26 TYR.3 SER.7
2d1yA TOT.240 # CYS.1 GLN.4 ILE.10 ASN.8 VAL.24 LYS.6 PHE.9 PRO.8 LEU.28 THR.7 ALA.45 HIS.2 GLY.24 ASP.8 SER.8 ARG.20 TRP.2 GLU.21 TYR.2 MET.3
3h87C TOT.72 # ILE.4 SER.3 GLN.3 GLY.4 PRO.2 THR.4 ALA.12 MET.1 ASP.8 LEU.10 ARG.12 TRP.1 VAL.5 GLU.2 TYR.1
3irmA TOT.520 # CYS.8 ASP.25 ASN.21 GLN.12 LYS.21 PRO.31 GLY.38 THR.29 PHE.21 ALA.37 HIS.13 MET.13 ILE.23 LEU.55 ARG.41 TRP.8 VAL.34 GLU.39 TYR.20 SER.31
3h87A TOT.136 # CYS.1 GLN.3 ASP.10 SER.7 VAL.8 LYS.3 ASN.1 PRO.7 THR.11 PHE.3 ALA.12 HIS.5 GLY.8 ILE.9 LEU.17 ARG.14 TRP.2 GLU.12 TYR.1 MET.2
4ksfA TOT.400 # CYS.3 GLN.9 HIS.10 SER.20 VAL.22 LYS.14 ILE.21 PRO.22 THR.19 PHE.20 GLU.28 GLY.20 ASP.30 LEU.48 ARG.40 TRP.6 ALA.49 ASN.13 TYR.6
4qp5A TOT.134 # ASP.4 SER.12 GLN.6 LYS.8 ILE.8 PRO.6 THR.4 PHE.5 ALA.6 GLY.20 HIS.7 GLU.3 LEU.6 ARG.2 TRP.4 VAL.8 ASN.10 TYR.10 MET.5
3eo7A TOT.478 # CYS.8 ILE.32 GLN.26 VAL.20 LYS.11 ASN.18 PRO.25 THR.26 PHE.18 ALA.40 HIS.16 GLY.32 ASP.29 LEU.57 ARG.28 TRP.8 GLU.25 TYR.31 SER.28
3uimA TOT.291 # CYS.4 MET.10 ASP.20 VAL.23 GLN.11 LYS.19 ILE.10 PRO.10 THR.7 PHE.9 ASN.8 GLY.24 HIS.6 LEU.40 ARG.21 TRP.3 ALA.21 GLU.24 TYR.8 SER.13
4hwhA TOT.84 # CYS.1 GLN.5 ASP.5 SER.2 VAL.12 LYS.6 ASN.3 THR.2 PHE.1 ALA.14 GLY.4 ILE.3 LEU.10 ARG.7 GLU.7 MET.2
3mtxA TOT.131 # CYS.6 ASP.9 SER.7 GLN.3 LYS.10 ASN.4 PRO.5 THR.13 PHE.5 ALA.8 GLY.7 HIS.2 ILE.10 LEU.12 ARG.4 TRP.1 VAL.7 GLU.9 TYR.8 MET.1
2bmxA TOT.157 # CYS.1 GLN.7 ASP.16 SER.9 VAL.13 LYS.4 ASN.4 PRO.9 THR.10 PHE.13 ALA.15 GLY.10 HIS.3 ILE.9 LEU.15 ARG.7 TRP.3 GLU.7 TYR.2
3dzdA TOT.366 # CYS.3 ILE.28 GLN.8 VAL.27 LYS.40 ASN.10 PRO.14 THR.15 PHE.19 ALA.22 HIS.6 GLY.25 ASP.16 LEU.39 ARG.18 TRP.2 GLU.46 TYR.10 SER.18
1xl3C TOT.88 # CYS.1 ASP.8 GLN.5 VAL.4 GLY.3 ASN.3 PRO.3 THR.1 PHE.6 ALA.7 HIS.2 MET.4 ILE.6 LEU.11 ARG.5 TRP.1 GLU.11 TYR.2 SER.5
3i2kA TOT.574 # CYS.4 GLN.13 ILE.26 SER.39 VAL.54 LYS.10 ASN.19 PRO.34 THR.37 PHE.21 ALA.57 HIS.11 GLY.51 ASP.49 LEU.50 ARG.32 TRP.13 GLU.27 TYR.17 MET.10
1qfxA TOT.441 # CYS.10 GLN.11 ILE.17 SER.33 VAL.24 LYS.12 PRO.25 THR.30 PHE.19 ALA.38 HIS.6 GLY.35 ASP.23 GLU.24 LEU.36 ARG.14 TRP.6 ASN.36 TYR.34 MET.8
3glaA TOT.97 # MET.1 ASP.7 GLN.3 VAL.6 LYS.4 ASN.2 PRO.5 THR.3 PHE.4 ALA.7 HIS.2 GLY.7 ILE.9 LEU.5 ARG.12 TRP.1 GLU.9 TYR.2 SER.8
2wp7A TOT.158 # CYS.2 GLN.5 ILE.9 SER.17 VAL.11 LYS.5 THR.9 PRO.12 HIS.3 PHE.10 ALA.4 GLY.15 ASP.6 ASN.7 LEU.19 ARG.5 TRP.1 GLU.11 TYR.6 MET.1
3q13A TOT.236 # CYS.6 GLN.11 ASP.15 SER.17 VAL.19 LYS.14 ILE.13 PRO.18 GLY.16 THR.13 PHE.4 ALA.17 MET.4 HIS.5 ASN.8 LEU.13 ARG.11 TRP.8 GLU.16 TYR.8
3thaA TOT.244 # CYS.3 GLN.8 ILE.27 SER.13 VAL.22 LYS.24 ASN.9 PRO.6 HIS.2 PHE.14 ALA.19 GLY.14 ASP.15 LEU.24 ARG.8 THR.10 GLU.17 TYR.9
3p26A TOT.435 # CYS.5 ILE.38 SER.35 GLN.19 LYS.30 PRO.19 THR.23 PHE.20 GLU.24 HIS.12 GLY.27 ASP.27 LEU.41 ARG.20 TRP.4 ALA.24 VAL.30 ASN.19 TYR.10 MET.8
1vajA TOT.201 # CYS.3 GLN.2 ILE.13 SER.3 VAL.16 LYS.16 ASN.3 PRO.24 THR.10 PHE.8 ALA.10 GLY.13 ASP.10 LEU.19 ARG.11 TRP.6 GLU.27 TYR.7
3zxkA TOT.530 # CYS.2 GLN.13 ASP.33 SER.29 ASN.26 VAL.37 LYS.11 ILE.22 PRO.30 THR.47 PHE.23 ALA.47 GLY.56 HIS.9 LEU.32 ARG.42 TRP.17 GLU.17 TYR.29 MET.8
3kbrA TOT.225 # CYS.2 ASP.17 GLN.13 VAL.13 LYS.9 ASN.6 PRO.12 THR.11 PHE.11 ALA.21 HIS.5 GLY.13 ILE.13 LEU.23 ARG.19 TRP.3 GLU.16 TYR.7 SER.11
2dknA TOT.254 # CYS.4 GLN.9 ASP.11 SER.14 VAL.26 MET.4 ASN.4 PRO.10 LYS.4 THR.11 PHE.6 ALA.45 GLY.32 HIS.3 ILE.11 LEU.25 ARG.16 TRP.1 GLU.14 TYR.4
3hhlA TOT.126 # GLN.5 ASP.8 SER.4 VAL.11 LYS.2 ASN.2 PRO.10 THR.4 PHE.5 ALA.14 HIS.5 GLY.11 ILE.6 LEU.9 ARG.12 TRP.2 GLU.11 TYR.5
2zdjA TOT.67 # GLN.2 ASP.7 SER.3 VAL.6 LYS.6 THR.1 PRO.2 HIS.1 PHE.4 ALA.3 GLY.5 ILE.4 ASN.1 LEU.6 ARG.2 TRP.1 GLU.8 TYR.5
1xkrA TOT.205 # CYS.1 GLN.4 ILE.26 SER.12 VAL.18 LYS.14 PRO.10 THR.9 PHE.7 GLU.22 HIS.1 GLY.13 ASP.10 LEU.19 ARG.4 ALA.13 ASN.8 TYR.4 MET.10
2w9yA TOT.135 # CYS.2 HIS.5 SER.12 GLN.5 GLY.6 ILE.5 PRO.7 LYS.14 THR.7 PHE.6 ALA.11 MET.3 ASP.8 ASN.4 LEU.14 ARG.4 VAL.9 GLU.12 TYR.1
1j5xA TOT.307 # CYS.2 ASP.12 VAL.23 GLN.6 LYS.28 ASN.9 PRO.11 THR.18 PHE.20 ALA.17 GLY.19 HIS.5 ILE.20 LEU.38 ARG.13 TRP.2 GLU.31 TYR.7 SER.26
3qyyA TOT.153 # CYS.2 GLN.4 ASP.12 ASN.4 VAL.11 MET.4 PRO.4 LYS.3 THR.4 PHE.6 ALA.18 HIS.4 GLY.14 ILE.4 LEU.18 ARG.15 TRP.5 GLU.11 TYR.3 SER.7
3aabA TOT.104 # GLN.2 ASP.2 SER.4 VAL.12 LYS.8 PRO.5 THR.4 PHE.4 GLU.10 GLY.9 ILE.9 LEU.8 ARG.7 ALA.7 ASN.4 TYR.8 MET.1
3isyA TOT.112 # ASP.4 VAL.11 GLN.12 LYS.9 ASN.5 PRO.3 THR.6 PHE.9 ALA.5 HIS.1 GLY.4 ILE.4 LEU.6 ARG.4 TRP.1 GLU.15 TYR.5 SER.8
2pusA TOT.733 # CYS.6 GLN.22 ILE.35 SER.54 VAL.39 LYS.49 THR.37 PRO.52 HIS.8 PHE.20 GLU.47 GLY.49 ASP.29 LEU.93 ARG.33 TRP.16 ALA.57 ASN.41 TYR.30 MET.16
4arcA TOT.813 # CYS.6 GLN.28 HIS.16 SER.24 VAL.68 MET.32 ILE.34 PRO.40 LYS.50 THR.50 PHE.27 GLU.61 GLY.55 ASP.55 LEU.64 ARG.38 TRP.19 ALA.75 ASN.35 TYR.36
2e6fA TOT.312 # CYS.8 GLN.7 ASP.13 SER.21 VAL.26 LYS.15 ASN.14 PRO.19 THR.11 PHE.18 ALA.27 HIS.4 GLY.28 ILE.10 LEU.37 ARG.13 GLU.19 TYR.12 MET.10
4h6cA TOT.180 # CYS.5 ILE.11 SER.12 GLN.8 LYS.11 ASN.6 PRO.14 THR.8 PHE.12 ALA.12 HIS.6 GLY.18 ASP.9 LEU.16 ARG.4 VAL.9 GLU.7 TYR.12
4g29A TOT.160 # CYS.2 GLN.3 ILE.11 SER.12 VAL.9 LYS.11 PRO.8 THR.8 PHE.10 ALA.12 HIS.2 GLY.8 ASP.9 GLU.12 LEU.10 ARG.6 TRP.3 ASN.16 TYR.8
3kn3A TOT.230 # CYS.2 HIS.3 SER.10 GLN.6 LYS.26 TRP.4 PRO.8 THR.15 PHE.11 GLU.21 GLY.19 ILE.14 LEU.15 ARG.6 ASP.13 ALA.19 VAL.20 ASN.11 TYR.7
2idoB TOT.72 # ASP.4 SER.4 GLN.5 LYS.3 ASN.4 PRO.4 THR.1 PHE.1 ALA.8 GLY.2 HIS.1 ILE.3 LEU.7 ARG.6 TRP.1 VAL.5 GLU.7 TYR.5 MET.1
3s9vA TOT.755 # CYS.11 GLN.28 ASP.48 SER.42 VAL.47 LYS.49 ILE.42 PRO.27 GLY.40 THR.40 PHE.42 ASN.31 MET.20 HIS.15 LEU.73 ARG.41 TRP.16 ALA.44 GLU.67 TYR.32
4irtA TOT.387 # CYS.5 GLN.17 ASP.25 SER.26 VAL.27 LYS.17 ASN.21 PRO.15 THR.27 PHE.10 ALA.14 GLY.31 HIS.17 ILE.22 LEU.27 ARG.24 TRP.13 GLU.26 TYR.23
2ixsA TOT.319 # CYS.2 ASP.24 SER.15 GLN.7 LYS.16 ASN.12 PRO.15 THR.18 PHE.18 ALA.36 HIS.8 GLY.19 ILE.9 LEU.35 ARG.24 TRP.8 VAL.17 GLU.23 TYR.6 MET.7
4x2rA TOT.243 # CYS.1 GLN.8 ILE.10 SER.10 VAL.24 LYS.6 ASN.6 PRO.8 ASP.17 THR.15 PHE.2 ALA.40 GLY.28 HIS.2 LEU.28 ARG.16 TRP.4 GLU.14 TYR.3 MET.1
3lwbA TOT.309 # CYS.4 GLN.4 ILE.15 SER.18 VAL.34 LYS.7 ASN.4 PRO.19 THR.16 PHE.11 ALA.39 HIS.2 GLY.31 ASP.22 LEU.29 ARG.22 TRP.3 GLU.17 TYR.7 MET.5
3tq5A TOT.106 # CYS.1 GLN.4 HIS.1 SER.8 VAL.7 LYS.3 ILE.11 PRO.9 THR.11 PHE.1 ALA.6 GLY.11 ASP.4 GLU.2 LEU.13 ARG.2 ASN.6 TYR.3 MET.3
4r4xA TOT.538 # CYS.2 ASP.27 GLN.27 VAL.32 LYS.45 PRO.22 THR.37 PHE.29 GLU.29 HIS.15 GLY.45 ILE.44 LEU.39 ARG.13 TRP.7 ALA.21 ASN.49 TYR.18 SER.37
2b0vA TOT.146 # CYS.3 ILE.11 SER.8 GLN.7 LYS.6 ASN.3 PRO.8 THR.10 PHE.5 ALA.11 HIS.5 GLY.10 ASP.9 LEU.12 ARG.8 TRP.2 VAL.10 GLU.11 TYR.7
3smdA TOT.132 # CYS.1 ILE.8 SER.6 GLN.6 LYS.14 PRO.9 THR.4 PHE.8 ALA.7 HIS.1 GLY.10 ASP.2 GLU.16 LEU.13 ARG.3 TRP.2 VAL.11 ASN.2 TYR.9
4tlpA TOT.175 # CYS.4 ASP.10 GLN.6 VAL.16 LYS.11 ILE.9 PRO.13 THR.6 PHE.5 GLU.12 GLY.13 HIS.5 LEU.19 ARG.8 TRP.2 ALA.10 ASN.9 TYR.5 SER.12
2w8mA TOT.165 # CYS.1 GLN.4 ASP.10 SER.11 VAL.7 LYS.17 ASN.4 PRO.3 THR.8 PHE.5 ALA.6 HIS.1 GLY.9 ILE.14 LEU.25 ARG.7 TRP.4 GLU.12 TYR.17
1j3nA TOT.408 # CYS.1 GLN.8 ASP.20 SER.18 VAL.32 LYS.14 ASN.7 PRO.23 THR.20 PHE.16 ALA.62 HIS.11 GLY.42 ILE.21 LEU.36 ARG.28 TRP.1 GLU.27 TYR.8 MET.13
1sfxA TOT.105 # ASP.4 SER.10 VAL.9 LYS.11 ASN.1 PRO.3 THR.1 PHE.5 ALA.4 GLY.8 ILE.7 LEU.14 ARG.11 TRP.1 GLU.13 TYR.3
4d7cA TOT.246 # PRO.7 CYS.1 GLN.7 ILE.13 SER.21 VAL.14 LYS.13 TRP.4 THR.16 PHE.16 ALA.15 GLY.15 HIS.10 GLU.12 LEU.26 ARG.11 ASP.13 ASN.13 TYR.13 MET.6
3ldgA TOT.352 # CYS.4 ILE.24 SER.14 GLN.12 LYS.22 ASN.20 PRO.18 THR.16 PHE.23 ALA.29 HIS.3 GLY.25 ASP.25 LEU.32 ARG.17 TRP.6 VAL.25 GLU.27 TYR.10
3zudA TOT.227 # CYS.4 MET.1 GLN.11 ASP.14 ASN.17 VAL.12 LYS.5 PRO.21 THR.19 PHE.4 ALA.16 HIS.6 GLY.25 ILE.20 LEU.16 ARG.2 TRP.5 GLU.5 TYR.12 SER.12
1nznA TOT.120 # CYS.1 ASP.6 GLN.6 VAL.9 LYS.15 ASN.5 PRO.2 THR.3 PHE.4 ALA.8 HIS.1 GLY.5 ILE.3 LEU.16 ARG.7 TRP.1 GLU.15 TYR.7 SER.6
3d2yA TOT.257 # ASP.16 SER.8 GLN.19 LYS.12 PRO.20 THR.11 PHE.7 ALA.32 HIS.7 GLY.15 ILE.16 GLU.15 LEU.21 ARG.17 TRP.6 VAL.14 ASN.6 TYR.12 MET.3
2v8qB TOT.73 # GLN.2 ILE.4 SER.5 VAL.5 LYS.7 ASN.4 PRO.6 GLY.1 THR.4 PHE.2 ALA.3 MET.3 HIS.4 LEU.10 ARG.3 ASP.2 GLU.3 TYR.5
2v8qA TOT.102 # CYS.2 ASP.6 GLN.5 VAL.7 LYS.5 PHE.4 PRO.5 GLY.2 HIS.2 THR.4 ASN.4 MET.4 ILE.7 LEU.9 ARG.9 TRP.2 ALA.6 GLU.5 TYR.5 SER.9
3dr2A TOT.299 # CYS.8 ASP.27 SER.16 GLN.13 LYS.2 ASN.6 PRO.25 THR.17 PHE.10 ALA.31 GLY.29 HIS.11 ILE.7 LEU.31 ARG.24 TRP.10 VAL.18 GLU.8 TYR.4 MET.2
4ezcA TOT.345 # CYS.8 ASP.9 SER.31 GLN.10 LYS.9 PRO.21 THR.23 PHE.18 ALA.29 HIS.4 GLY.28 ILE.21 GLU.4 LEU.54 ARG.3 TRP.11 VAL.24 ASN.15 TYR.12 MET.11
3s6pE TOT.33 # ILE.2 SER.7 VAL.3 LYS.2 ASN.1 THR.2 PHE.2 ALA.8 GLY.1 LEU.2 GLU.2 MET.1
2pktA TOT.90 # CYS.2 GLN.4 ASP.6 SER.6 VAL.4 LYS.3 PRO.4 THR.9 PHE.2 ALA.7 HIS.2 GLY.9 ILE.6 GLU.5 LEU.9 ARG.4 TRP.1 ASN.5 MET.2
3s6pA TOT.529 # CYS.5 GLN.16 ASP.34 SER.40 VAL.43 LYS.12 PRO.35 THR.47 PHE.26 GLU.26 HIS.6 GLY.34 ILE.16 LEU.41 ARG.26 TRP.12 ALA.50 ASN.30 TYR.23 MET.7
2qveA TOT.525 # MET.8 ILE.33 VAL.42 GLN.22 LYS.14 PRO.22 THR.25 PHE.14 ASN.19 GLY.44 HIS.12 LEU.55 ARG.40 ASP.24 ALA.66 GLU.42 TYR.13 SER.30
4huaA TOT.107 # CYS.2 GLN.3 ASP.11 SER.3 VAL.5 LYS.10 ASN.4 ARG.1 HIS.1 THR.6 ALA.16 GLY.9 ILE.9 LEU.13 PHE.4 TRP.2 GLU.5 TYR.2 MET.1
4g12A TOT.182 # CYS.1 ASP.10 GLN.5 VAL.16 LYS.3 ASN.3 PRO.6 HIS.5 PHE.7 ALA.36 GLY.11 ILE.5 LEU.28 ARG.19 TRP.1 THR.5 GLU.11 TYR.1 SER.9
4gciA TOT.202 # CYS.1 GLN.5 ILE.10 SER.13 VAL.16 LYS.13 PRO.10 THR.9 PHE.8 ALA.21 HIS.6 GLY.9 ASP.14 GLU.12 LEU.25 ARG.10 TRP.2 ASN.6 TYR.9 MET.3
2dh2A TOT.417 # CYS.1 ASP.29 VAL.17 GLN.23 LYS.20 ASN.14 PRO.20 THR.18 PHE.19 ALA.32 HIS.8 GLY.35 ILE.12 LEU.68 ARG.18 TRP.9 GLU.21 TYR.9 SER.44
2i9uA TOT.419 # CYS.6 GLN.4 ILE.37 SER.31 VAL.22 LYS.40 PRO.14 THR.21 PHE.22 ALA.16 HIS.9 GLY.29 ASP.26 GLU.21 LEU.39 ARG.11 TRP.2 ASN.34 TYR.23 MET.12
2vywA TOT.148 # ILE.12 SER.7 GLN.9 LYS.13 ASN.2 PRO.4 GLY.9 THR.11 PHE.7 ALA.15 MET.3 HIS.6 LEU.15 ARG.5 ASP.8 VAL.7 GLU.10 TYR.5
2qx2A TOT.313 # ILE.21 SER.20 GLN.18 LYS.40 ASN.26 PRO.13 THR.15 PHE.11 ALA.17 GLY.16 HIS.4 LEU.25 ARG.6 TRP.1 ASP.28 VAL.10 GLU.24 TYR.18
2omlA TOT.179 # MET.2 ASP.10 GLN.7 VAL.12 LYS.6 PRO.14 THR.14 PHE.4 GLU.10 HIS.1 GLY.15 ILE.8 LEU.21 ARG.17 TRP.4 ALA.13 ASN.10 TYR.7 SER.4
3ctbA TOT.287 # CYS.5 HIS.10 SER.18 GLN.20 LYS.16 TRP.3 PRO.12 GLY.12 THR.14 PHE.18 ALA.15 MET.13 ILE.16 GLU.22 LEU.41 ARG.18 ASP.11 VAL.10 ASN.6 TYR.7
2vsyA TOT.547 # CYS.6 ASP.31 SER.23 GLN.27 LYS.5 PRO.34 THR.26 PHE.21 ALA.92 HIS.24 GLY.43 ILE.5 GLU.22 LEU.70 ARG.41 TRP.11 VAL.38 ASN.9 TYR.9 MET.10
4gmfA TOT.335 # CYS.10 ILE.14 SER.20 GLN.18 LYS.4 ASN.4 PRO.23 ASP.15 THR.16 PHE.10 ALA.29 GLY.25 HIS.17 LEU.49 ARG.24 TRP.8 VAL.20 GLU.16 TYR.8 MET.5
3wh9A TOT.345 # CYS.7 GLN.12 HIS.7 SER.35 VAL.19 MET.5 ASN.15 PRO.7 LYS.12 THR.30 PHE.14 ALA.23 GLY.38 ASP.31 ILE.17 LEU.24 ARG.5 TRP.11 GLU.12 TYR.21
1w2lA TOT.97 # CYS.2 GLN.5 ASP.3 SER.9 VAL.6 LYS.4 ILE.4 PRO.5 THR.4 PHE.4 ALA.10 GLY.8 HIS.1 ASN.2 LEU.9 ARG.6 GLU.8 TYR.5 MET.2
4wihA TOT.350 # CYS.2 ILE.21 SER.15 VAL.20 GLN.14 LYS.35 ASN.16 PRO.14 THR.14 PHE.25 ALA.22 HIS.10 GLY.23 ASP.18 LEU.32 ARG.15 TRP.6 GLU.27 TYR.14 MET.7
4eycA TOT.103 # CYS.4 ILE.3 SER.8 GLN.5 LYS.8 PRO.6 THR.8 PHE.3 ALA.4 HIS.1 GLY.6 ASP.13 GLU.3 LEU.8 ARG.7 VAL.7 ASN.4 TYR.2 MET.3
1mj3A TOT.257 # CYS.5 MET.8 ILE.19 ASN.12 GLN.11 LYS.21 PRO.6 THR.14 PHE.11 ALA.32 HIS.3 GLY.23 ASP.10 LEU.21 ARG.9 TRP.1 VAL.13 GLU.22 TYR.5 SER.11
4qqdA TOT.118 # CYS.1 GLN.3 ASP.10 SER.3 VAL.17 MET.3 PRO.3 LYS.1 THR.5 PHE.4 ALA.8 HIS.1 GLY.6 ILE.7 GLU.9 LEU.6 ARG.11 TRP.3 ASN.9 TYR.8
1urqA TOT.52 # ASP.3 SER.6 GLN.1 LYS.1 THR.1 GLY.5 HIS.2 PHE.1 ALA.9 MET.4 ILE.1 LEU.6 ARG.4 VAL.3 GLU.5
4qndA TOT.97 # CYS.1 GLN.1 HIS.4 SER.5 VAL.6 LYS.3 ASN.2 PRO.4 THR.7 PHE.2 ALA.7 GLY.9 ILE.9 LEU.17 ARG.1 TRP.3 GLU.3 TYR.7 MET.6
3pggA TOT.68 # CYS.1 GLN.1 ILE.3 SER.2 VAL.9 GLY.8 PRO.2 LYS.2 THR.1 PHE.3 ALA.3 MET.4 ASP.5 GLU.4 LEU.9 ARG.3 ASN.5 TYR.3
3kqiA TOT.71 # CYS.7 ASP.5 SER.3 VAL.6 MET.2 ILE.3 PRO.4 LYS.6 THR.5 PHE.2 ALA.3 GLY.4 HIS.4 ASN.1 ARG.3 TRP.2 GLU.6 TYR.3 LEU.2
2rdyA TOT.769 # CYS.9 GLN.26 ILE.38 ASN.30 VAL.43 LYS.35 PRO.34 THR.45 PHE.30 ALA.60 HIS.25 GLY.66 ASP.43 LEU.77 ARG.43 TRP.19 GLU.61 TYR.32 SER.53
1is3A TOT.134 # GLN.5 ILE.6 SER.8 VAL.11 LYS.5 TRP.1 PRO.3 GLY.9 THR.11 PHE.11 ALA.8 MET.3 HIS.5 GLU.7 LEU.10 ARG.8 ASP.8 ASN.11 TYR.4
4f98A TOT.58 # HIS.4 SER.4 VAL.8 LYS.2 PRO.3 ASP.4 THR.5 PHE.1 ASN.2 GLY.7 ILE.1 LEU.5 ARG.3 TRP.1 GLU.5 TYR.3
3w77A TOT.207 # GLN.3 ASP.9 SER.4 VAL.20 LYS.17 ASN.11 PRO.9 THR.10 PHE.12 ALA.28 HIS.3 GLY.16 ILE.9 LEU.17 ARG.3 TRP.1 GLU.20 TYR.10 MET.5
2vtyA TOT.138 # CYS.4 GLN.2 ASP.14 SER.10 VAL.9 GLY.3 PRO.4 LYS.7 THR.13 PHE.5 ALA.3 HIS.2 MET.8 ILE.13 GLU.3 LEU.12 ARG.8 ASN.8 TYR.10
2iw0A TOT.226 # CYS.4 ASP.18 GLN.9 VAL.13 MET.3 ASN.14 PRO.11 LYS.9 THR.18 PHE.6 ALA.17 HIS.13 GLY.17 ILE.10 LEU.21 ARG.10 TRP.2 GLU.10 TYR.9 SER.12
1s3sG TOT.94 # ILE.8 SER.6 GLN.5 LYS.2 PRO.4 THR.7 PHE.4 ALA.14 HIS.1 GLY.5 ASP.4 GLU.3 LEU.10 ARG.6 VAL.5 ASN.8 MET.2
2w3yA TOT.267 # CYS.1 MET.2 ASP.16 VAL.21 GLN.16 LYS.24 ASN.22 PRO.7 THR.15 PHE.21 ALA.21 HIS.5 GLY.18 ILE.13 LEU.14 ARG.5 TRP.1 GLU.15 TYR.17 SER.13
4ap5A TOT.389 # CYS.5 GLN.13 ILE.20 SER.23 VAL.25 LYS.21 ASN.9 PRO.18 THR.16 PHE.17 ALA.17 HIS.13 GLY.24 ASP.24 LEU.39 ARG.33 TRP.14 GLU.34 TYR.18 MET.6
4ggtA TOT.105 # CYS.2 MET.1 ILE.5 VAL.6 GLN.5 LYS.5 PRO.7 ASP.1 THR.10 PHE.7 ALA.7 GLY.12 HIS.1 GLU.2 LEU.6 ARG.4 TRP.5 ASN.5 TYR.4 SER.10
4g4kA TOT.98 # CYS.2 GLN.3 ILE.8 SER.10 VAL.7 LYS.8 THR.2 PHE.7 ASN.8 HIS.5 GLY.2 ASP.6 LEU.6 ARG.8 ALA.2 GLU.8 TYR.5 MET.1
1w4rA TOT.174 # CYS.8 ILE.10 SER.7 VAL.16 GLN.7 LYS.11 PRO.5 THR.9 PHE.10 ALA.18 HIS.2 GLY.12 ASP.7 GLU.12 LEU.14 ARG.12 ASN.3 TYR.6 MET.5
1n2sA TOT.298 # CYS.3 GLN.9 ASP.13 SER.12 VAL.21 GLY.21 PRO.15 LYS.17 THR.28 PHE.10 GLU.18 HIS.7 MET.4 ILE.10 LEU.31 ARG.12 TRP.6 ALA.37 ASN.16 TYR.8
1wlgA TOT.293 # ILE.11 SER.25 GLN.17 MET.6 PRO.12 LYS.10 THR.32 PHE.11 ALA.29 HIS.2 GLY.29 ASP.14 GLU.8 LEU.19 ARG.3 TRP.2 VAL.20 ASN.34 TYR.9
4nreA TOT.675 # CYS.11 MET.10 GLN.36 HIS.19 ASN.22 VAL.38 LYS.23 ILE.32 PRO.53 THR.37 PHE.32 ALA.49 GLY.46 ASP.28 LEU.84 ARG.35 TRP.16 GLU.45 TYR.18 SER.41
2oa5A TOT.89 # GLN.3 ASP.3 SER.9 VAL.9 LYS.10 ASN.1 PRO.1 THR.6 ALA.9 HIS.2 GLY.1 ILE.4 LEU.11 ARG.7 GLU.12 TYR.1
1geqA TOT.241 # CYS.1 GLN.2 ILE.17 SER.11 VAL.21 LYS.20 ASN.7 PRO.10 THR.12 PHE.13 ALA.21 HIS.4 GLY.19 ASP.12 LEU.25 ARG.14 TRP.1 GLU.19 TYR.9 MET.3
4lu6A TOT.527 # CYS.7 MET.13 ASP.39 GLN.14 VAL.32 LYS.17 PRO.27 THR.28 PHE.34 ALA.46 HIS.15 GLY.38 ILE.22 GLU.33 LEU.44 ARG.38 TRP.11 ASN.22 TYR.20 SER.27
2acfA TOT.172 # CYS.4 ASP.8 GLN.10 VAL.17 LYS.12 ASN.14 PRO.6 GLY.14 THR.6 PHE.3 ALA.18 HIS.7 MET.4 ILE.9 LEU.21 ARG.1 GLU.5 TYR.6 SER.7
3e6uA TOT.409 # CYS.13 ILE.19 GLN.19 VAL.17 LYS.22 THR.16 PRO.20 GLY.32 HIS.16 PHE.18 ALA.36 MET.10 ASP.18 GLU.20 LEU.47 ARG.16 TRP.5 ASN.16 TYR.33 SER.16
1usuB TOT.131 # CYS.2 GLN.6 ASP.7 SER.13 VAL.10 LYS.14 PRO.4 THR.3 PHE.8 ASN.4 HIS.2 GLY.8 ILE.12 LEU.11 ARG.3 TRP.1 ALA.8 GLU.12 TYR.3
1usuA TOT.244 # ILE.17 GLN.7 VAL.15 LYS.24 PRO.10 GLY.5 THR.14 PHE.17 GLU.24 HIS.3 MET.2 ASP.17 LEU.25 ARG.9 TRP.3 ALA.13 ASN.14 TYR.10 SER.15
3oftA TOT.396 # CYS.5 GLN.12 HIS.8 SER.13 VAL.37 LYS.11 ILE.14 PRO.29 THR.15 PHE.16 ALA.43 GLY.32 ASP.29 GLU.21 LEU.44 ARG.34 TRP.8 ASN.7 TYR.4 MET.14
4wy4C TOT.78 # ASP.4 GLN.6 VAL.6 LYS.6 ASN.1 GLY.2 THR.3 PHE.1 ALA.8 HIS.1 MET.3 ILE.3 LEU.7 ARG.8 GLU.8 TYR.2 SER.9
4gb7A TOT.378 # HIS.11 GLN.20 VAL.18 LYS.22 PRO.19 ASP.21 THR.24 PHE.12 ALA.30 GLY.22 ILE.25 GLU.29 LEU.32 ARG.11 TRP.6 ASN.30 TYR.20 SER.26
4pnlA TOT.197 # CYS.5 ILE.12 SER.13 GLN.8 LYS.10 TRP.1 PRO.7 THR.6 PHE.10 ASN.10 GLY.20 HIS.13 LEU.10 ARG.14 ASP.3 ALA.11 VAL.11 GLU.15 TYR.12 MET.6
3s21A TOT.333 # CYS.4 MET.9 ILE.23 GLN.9 VAL.27 LYS.16 PRO.11 THR.19 PHE.9 ALA.38 HIS.8 GLY.27 ASP.18 GLU.21 LEU.36 ARG.18 TRP.4 ASN.12 TYR.5 SER.19
4f0rA TOT.419 # CYS.2 ILE.24 ASN.16 GLN.7 LYS.18 PRO.15 THR.24 PHE.9 ALA.63 HIS.17 GLY.32 ASP.31 LEU.50 ARG.24 TRP.5 VAL.28 GLU.24 TYR.8 SER.22
4mqqA TOT.428 # CYS.8 GLN.12 ASP.25 SER.19 VAL.39 MET.13 ASN.3 PRO.24 LYS.4 THR.27 PHE.12 ALA.64 HIS.17 GLY.39 ILE.19 LEU.44 ARG.25 TRP.9 GLU.15 TYR.10
3qfqA TOT.102 # CYS.6 GLN.1 ILE.6 SER.10 VAL.6 LYS.7 PRO.6 GLY.2 THR.5 PHE.8 ALA.5 MET.2 HIS.3 GLU.5 LEU.10 ARG.2 ASP.6 ASN.6 TYR.6
3qi7A TOT.335 # CYS.2 GLN.18 ILE.27 SER.19 VAL.31 LYS.30 PRO.15 THR.17 PHE.12 GLU.31 HIS.2 GLY.14 ASP.24 LEU.28 ARG.6 ALA.23 ASN.22 TYR.14
4mzcA TOT.104 # CYS.3 GLN.2 HIS.2 SER.4 VAL.9 MET.2 TRP.1 PRO.3 LYS.14 THR.2 PHE.2 ALA.6 GLY.6 ILE.11 GLU.9 LEU.9 ARG.2 ASP.5 ASN.9 TYR.3
3b7cA TOT.110 # GLN.5 ASP.12 SER.5 VAL.6 LYS.7 PRO.3 THR.7 PHE.3 ASN.6 HIS.1 GLY.8 ILE.6 LEU.13 ARG.4 TRP.5 ALA.6 GLU.8 TYR.5
4knkA TOT.199 # CYS.1 GLN.5 HIS.8 SER.13 VAL.13 LYS.6 ILE.12 PRO.10 THR.11 PHE.5 ALA.16 GLY.15 ASP.15 GLU.8 LEU.10 ARG.6 TRP.3 ASN.17 TYR.22 MET.3
3ctrA TOT.75 # ILE.5 SER.9 GLN.5 LYS.4 ASN.2 PRO.3 THR.5 PHE.4 ALA.5 HIS.2 GLY.4 ASP.4 LEU.5 ARG.1 TRP.2 VAL.5 GLU.4 TYR.5 MET.1
1w5tA TOT.394 # CYS.1 GLN.11 HIS.9 SER.24 VAL.27 LYS.17 TRP.2 PRO.14 THR.16 PHE.8 ALA.38 GLY.25 ILE.28 GLU.30 LEU.54 ARG.31 ASP.19 ASN.13 TYR.18 MET.9
4fppA TOT.205 # CYS.1 GLN.8 ASP.13 SER.14 VAL.13 MET.4 PRO.12 LYS.6 THR.3 PHE.7 ALA.42 HIS.2 GLY.16 ILE.11 GLU.10 LEU.21 ARG.13 TRP.3 ASN.5 TYR.1
1wb9A TOT.788 # CYS.6 MET.23 ASP.40 GLN.39 VAL.40 LYS.27 ASN.25 PRO.35 THR.48 PHE.22 ALA.82 HIS.15 GLY.50 ILE.45 LEU.99 ARG.63 TRP.5 GLU.64 TYR.26 SER.34
3llbA TOT.81 # ASP.6 SER.7 VAL.8 MET.1 ILE.2 PRO.5 LYS.3 THR.2 PHE.9 ALA.4 GLY.6 HIS.2 GLU.6 LEU.10 ARG.6 ASN.3 TYR.1
2ozeA TOT.284 # GLN.8 HIS.3 SER.18 VAL.16 LYS.26 PRO.9 ASP.17 THR.18 PHE.11 ASN.23 GLY.10 ILE.22 LEU.40 ARG.7 TRP.2 ALA.11 GLU.23 TYR.12 MET.8
2cb3A TOT.170 # CYS.6 ASP.7 ASN.9 GLN.5 LYS.5 PRO.8 GLY.12 THR.8 PHE.5 ALA.9 HIS.6 MET.4 ILE.15 LEU.16 ARG.12 TRP.4 VAL.7 GLU.13 TYR.7 SER.12
1rhyA TOT.180 # CYS.4 GLN.4 ASP.9 SER.16 VAL.7 GLY.13 ILE.14 PRO.4 LYS.9 THR.11 PHE.8 ALA.20 MET.5 HIS.9 ASN.3 LEU.18 ARG.10 GLU.12 TYR.4
4k5sA TOT.487 # CYS.1 ILE.9 GLN.10 VAL.49 GLY.59 PRO.34 LYS.4 THR.34 PHE.13 GLU.34 HIS.11 MET.3 ASP.23 LEU.58 ARG.49 TRP.8 ALA.58 ASN.5 TYR.10 SER.15
1srqA TOT.324 # CYS.5 ILE.13 SER.14 ASN.13 GLN.13 LYS.21 PRO.16 THR.17 PHE.25 ALA.18 HIS.11 GLY.20 ASP.16 LEU.32 ARG.15 VAL.29 GLU.26 TYR.15 MET.5
2q66A TOT.513 # CYS.8 GLN.16 HIS.9 SER.28 VAL.40 LYS.38 ILE.36 PRO.27 THR.26 PHE.29 ASN.23 GLY.25 ASP.31 LEU.49 ARG.27 TRP.7 ALA.34 GLU.35 TYR.17 MET.8
2q00A TOT.112 # CYS.1 GLN.1 ILE.7 SER.10 VAL.9 LYS.11 PRO.1 THR.4 PHE.4 ASN.8 HIS.2 GLY.3 ASP.2 LEU.15 ARG.2 TRP.3 ALA.9 GLU.16 TYR.4
2pftA TOT.484 # CYS.3 ILE.34 SER.38 GLN.27 MET.10 TRP.3 PRO.17 LYS.36 THR.23 PHE.21 ASN.18 GLY.20 HIS.14 LEU.56 ARG.21 ASP.28 ALA.28 VAL.32 GLU.34 TYR.21
4omvA TOT.194 # ILE.29 VAL.10 GLN.6 LYS.21 PRO.10 GLY.2 THR.10 PHE.9 ASN.13 HIS.1 MET.5 ASP.11 LEU.20 ARG.6 ALA.10 GLU.13 TYR.8 SER.10
3cafA TOT.100 # CYS.2 GLN.2 HIS.5 SER.4 VAL.9 LYS.9 ILE.3 PRO.6 GLY.7 THR.6 PHE.2 ALA.5 MET.4 ASP.2 GLU.7 LEU.4 ARG.6 TRP.3 ASN.9 TYR.5
3nl9A TOT.158 # ASP.8 GLN.14 VAL.13 LYS.9 ASN.3 PRO.13 THR.9 PHE.9 ALA.16 HIS.4 GLY.11 ILE.5 LEU.13 ARG.5 TRP.2 GLU.16 TYR.4 SER.4
1wrbA TOT.232 # CYS.6 ILE.24 SER.14 GLN.11 LYS.13 ASN.11 PRO.14 GLY.10 THR.14 PHE.10 ALA.17 HIS.4 MET.7 ASP.12 LEU.23 ARG.10 VAL.11 GLU.13 TYR.8
4h3tA TOT.512 # CYS.2 GLN.12 ASP.37 SER.26 VAL.39 LYS.13 PRO.30 THR.17 PHE.24 ALA.73 HIS.9 GLY.37 ILE.14 GLU.36 LEU.57 ARG.54 TRP.12 ASN.8 TYR.12
3qooA TOT.130 # ASP.9 VAL.22 GLN.2 LYS.6 ASN.4 PRO.5 THR.11 PHE.7 ALA.8 GLY.9 HIS.3 ILE.1 LEU.12 ARG.10 TRP.1 GLU.11 TYR.1 SER.8
4evzA TOT.253 # CYS.1 MET.3 ASP.15 GLN.2 VAL.27 LYS.10 ASN.2 PRO.6 THR.12 PHE.8 ALA.32 HIS.10 GLY.26 ILE.14 LEU.22 ARG.18 TRP.2 GLU.30 TYR.3 SER.10
3l8wA TOT.295 # CYS.3 HIS.11 SER.21 GLN.12 LYS.23 ASN.14 PRO.9 ASP.17 THR.26 PHE.10 ALA.19 GLY.15 ILE.18 LEU.18 ARG.12 TRP.7 VAL.26 GLU.20 TYR.10 MET.4
4lscA TOT.181 # CYS.4 GLN.3 ASP.8 SER.20 VAL.12 LYS.3 ILE.7 PRO.14 THR.13 PHE.5 ALA.3 GLY.13 HIS.4 GLU.6 LEU.34 ARG.5 TRP.2 ASN.21 TYR.3 MET.1
3b1uA TOT.628 # CYS.18 GLN.28 ILE.29 SER.41 VAL.48 LYS.37 THR.39 PRO.44 GLY.40 HIS.14 PHE.33 ALA.29 MET.17 ASP.37 GLU.39 LEU.64 ARG.25 TRP.10 ASN.23 TYR.13
2hhzA TOT.124 # ILE.10 SER.4 GLN.7 LYS.3 ASN.4 PRO.4 THR.9 PHE.8 ALA.11 GLY.10 HIS.9 LEU.8 ARG.5 ASP.6 VAL.10 GLU.7 TYR.9
4kikA TOT.615 # CYS.15 ASP.30 GLN.50 VAL.36 LYS.37 ILE.31 ASN.27 GLY.27 THR.33 PHE.15 ALA.28 MET.18 HIS.11 LEU.82 ARG.41 TRP.12 PRO.23 GLU.54 TYR.14 SER.31
3n7cA TOT.92 # CYS.2 GLN.3 HIS.1 SER.5 VAL.10 LYS.5 ILE.7 PRO.2 THR.4 PHE.4 ALA.7 GLY.9 ASP.6 GLU.4 LEU.12 ARG.5 TRP.1 ASN.3 TYR.2
3b0xA TOT.575 # CYS.1 GLN.15 ILE.17 SER.20 VAL.42 LYS.31 ASN.8 PRO.32 THR.21 PHE.14 ALA.59 HIS.12 GLY.51 ASP.31 LEU.79 ARG.51 TRP.7 GLU.57 TYR.18 MET.9
3hhsB TOT.656 # CYS.10 GLN.25 ILE.35 ASN.39 VAL.44 MET.26 TRP.8 PRO.42 LYS.27 THR.34 PHE.41 ALA.30 GLY.37 HIS.18 LEU.45 ARG.51 ASP.49 GLU.30 TYR.27 SER.38
3hhsA TOT.669 # CYS.8 HIS.17 SER.42 GLN.26 MET.22 ILE.37 PRO.43 LYS.31 THR.33 PHE.35 ASN.39 GLY.28 ASP.45 LEU.53 ARG.46 TRP.10 ALA.42 VAL.40 GLU.46 TYR.26
1y14B TOT.154 # CYS.4 HIS.4 GLN.7 VAL.16 LYS.13 ILE.14 PRO.5 GLY.11 THR.7 PHE.11 ALA.4 MET.4 ASP.8 GLU.8 LEU.11 ARG.4 ASN.4 TYR.6 SER.13
1y14A TOT.133 # CYS.1 GLN.6 ASP.7 SER.9 VAL.6 LYS.9 ASN.8 PRO.2 THR.10 PHE.4 ALA.9 HIS.1 GLY.5 ILE.7 LEU.22 ARG.9 GLU.15 TYR.2 MET.1
3o6uA TOT.118 # ASP.10 SER.8 GLN.3 LYS.17 ILE.6 PRO.2 THR.9 PHE.2 ALA.11 GLY.9 HIS.1 GLU.14 LEU.8 ARG.1 VAL.6 ASN.6 TYR.5
1gqeA TOT.354 # CYS.2 ASP.32 GLN.19 VAL.23 LYS.20 ILE.19 PRO.7 THR.16 PHE.8 ASN.13 GLY.25 HIS.5 LEU.29 ARG.25 TRP.5 ALA.30 GLU.39 TYR.11 SER.26
4omfB TOT.280 # CYS.5 MET.10 ILE.17 VAL.21 GLN.11 LYS.27 ASN.3 PRO.13 THR.19 PHE.10 ALA.24 HIS.1 GLY.27 ASP.13 LEU.24 ARG.7 TRP.3 GLU.23 TYR.10 SER.12
4omfA TOT.385 # CYS.5 GLN.9 ILE.28 ASN.10 VAL.32 MET.12 TRP.2 PRO.24 LYS.17 THR.20 PHE.10 ALA.35 GLY.29 HIS.17 LEU.29 ARG.25 ASP.23 GLU.32 TYR.9 SER.17
4omfG TOT.231 # CYS.16 ASP.15 VAL.13 GLN.11 LYS.9 ASN.7 PRO.12 GLY.18 THR.12 PHE.3 ALA.18 HIS.4 MET.8 ILE.12 LEU.28 ARG.8 TRP.3 GLU.16 TYR.7 SER.11
3tuoA TOT.98 # CYS.2 HIS.4 SER.5 GLN.5 LYS.5 ILE.3 PRO.4 GLY.5 THR.4 PHE.3 ALA.9 MET.4 ASP.6 ASN.2 LEU.12 ARG.1 TRP.1 VAL.12 GLU.6 TYR.5
4nbtA TOT.239 # GLN.9 HIS.1 SER.7 VAL.23 MET.8 ILE.18 PRO.5 LYS.17 THR.17 PHE.6 GLU.9 GLY.27 ASP.13 LEU.21 ARG.5 TRP.2 ALA.27 ASN.15 TYR.9
5mdhA TOT.333 # CYS.5 GLN.9 ASP.25 SER.24 VAL.29 GLY.22 PRO.13 LYS.31 THR.15 PHE.11 ASN.12 HIS.4 MET.8 ILE.24 LEU.31 ARG.10 TRP.4 ALA.31 GLU.18 TYR.7
1z72A TOT.213 # CYS.1 ASP.16 GLN.12 VAL.15 LYS.14 PRO.4 THR.5 PHE.16 GLU.17 HIS.7 GLY.11 ILE.7 LEU.30 ARG.6 TRP.5 ALA.22 ASN.6 TYR.10 SER.9
2avnA TOT.226 # CYS.1 GLN.6 ASP.17 SER.13 VAL.18 LYS.12 THR.11 PRO.8 HIS.3 PHE.17 GLU.20 GLY.14 ILE.13 LEU.25 ARG.15 TRP.5 ALA.13 ASN.6 TYR.9
3ppeA TOT.203 # MET.3 ILE.21 GLN.4 VAL.14 LYS.12 PRO.7 THR.15 PHE.7 ASN.10 HIS.5 GLY.12 ASP.17 LEU.10 ARG.11 TRP.2 ALA.16 GLU.15 TYR.7 SER.15
1pwbA TOT.151 # CYS.4 MET.1 GLN.13 ASP.5 ASN.7 VAL.11 LYS.10 PRO.6 THR.8 PHE.9 ALA.17 HIS.1 GLY.13 ILE.2 LEU.12 ARG.4 TRP.2 GLU.13 TYR.3 SER.10
3pisA TOT.37 # CYS.4 ILE.1 ASN.3 VAL.2 LYS.1 PRO.3 THR.2 PHE.1 ALA.3 HIS.1 GLY.4 ASP.1 LEU.1 TRP.1 GLU.5 TYR.2 SER.2
2z1qA TOT.543 # CYS.1 MET.7 ILE.28 VAL.47 GLN.19 LYS.27 ASN.10 PRO.21 THR.20 PHE.14 ALA.60 GLY.58 HIS.8 LEU.65 ARG.36 TRP.4 ASP.19 GLU.54 TYR.22 SER.23
3r2kA TOT.154 # PRO.5 CYS.1 GLN.9 HIS.8 SER.4 VAL.4 GLY.8 TRP.2 LYS.5 THR.7 PHE.3 ASN.3 MET.6 ILE.8 LEU.23 ARG.11 ASP.11 ALA.13 GLU.17 TYR.6
3fh3A TOT.138 # GLN.3 ILE.5 SER.9 VAL.8 LYS.20 ASN.4 PRO.2 THR.9 PHE.6 ALA.11 GLY.7 HIS.3 LEU.10 ARG.5 ASP.7 GLU.21 TYR.8
1h7eA TOT.245 # CYS.2 MET.8 GLN.12 HIS.5 ASN.8 VAL.24 LYS.9 PRO.17 ASP.13 THR.10 PHE.3 ALA.30 GLY.13 ILE.13 LEU.20 ARG.18 TRP.1 GLU.19 TYR.9 SER.11
4dvzA TOT.459 # ASP.33 SER.35 GLN.20 LYS.64 ASN.43 PRO.3 THR.15 PHE.22 ALA.38 HIS.6 GLY.23 ILE.18 LEU.48 ARG.11 TRP.2 VAL.27 GLU.36 TYR.10 MET.5
2ixnA TOT.291 # CYS.3 ILE.21 SER.27 GLN.7 LYS.23 PRO.11 THR.10 PHE.19 ASN.12 HIS.12 GLY.14 ASP.14 LEU.33 ARG.12 TRP.6 ALA.9 VAL.12 GLU.22 TYR.14 MET.10
1g1cA TOT.98 # CYS.2 GLN.4 ILE.8 SER.8 VAL.10 LYS.6 THR.3 PRO.4 HIS.2 PHE.3 ASN.3 GLY.6 ASP.6 LEU.3 ARG.6 TRP.3 ALA.7 GLU.9 TYR.3 MET.2
4dbfA TOT.258 # CYS.3 MET.8 GLN.5 ILE.24 ASN.9 VAL.16 LYS.14 PRO.21 THR.18 PHE.11 ALA.19 HIS.2 GLY.24 ASP.20 LEU.18 ARG.10 TRP.4 GLU.17 TYR.2 SER.13
2q2iA TOT.112 # CYS.1 GLN.3 ILE.10 SER.6 VAL.14 LYS.7 ASN.3 PRO.10 THR.4 PHE.6 ALA.9 HIS.1 GLY.10 ASP.5 LEU.5 ARG.6 GLU.9 TYR.2 MET.1
2bibA TOT.540 # ILE.30 SER.41 GLN.22 LYS.46 PRO.11 THR.27 PHE.18 ALA.20 HIS.15 GLY.47 ASP.47 GLU.32 LEU.33 ARG.12 TRP.26 VAL.33 ASN.33 TYR.36 MET.11
1gd8A TOT.105 # ASP.7 GLN.3 VAL.8 LYS.7 ILE.3 PRO.3 THR.5 PHE.2 ALA.9 GLY.7 HIS.5 ASN.1 LEU.18 ARG.16 GLU.5 TYR.3 SER.3
3ot9A TOT.390 # CYS.1 HIS.9 SER.16 GLN.11 LYS.25 TRP.1 PRO.20 GLY.38 THR.23 PHE.16 ASN.14 MET.16 ILE.23 LEU.39 ARG.15 ASP.31 ALA.20 VAL.22 GLU.35 TYR.15
2hihA TOT.387 # ASP.25 SER.26 GLN.11 LYS.26 PRO.11 GLY.39 THR.28 PHE.13 ASN.21 HIS.21 MET.8 ILE.25 LEU.25 ARG.13 TRP.7 ALA.23 VAL.16 GLU.28 TYR.21
4o94A TOT.298 # ILE.15 SER.18 GLN.22 LYS.32 PRO.10 THR.11 PHE.17 ALA.35 HIS.4 GLY.17 ASP.21 GLU.16 LEU.22 ARG.5 TRP.6 VAL.24 ASN.17 TYR.6
3dffA TOT.263 # CYS.1 ASP.26 GLN.10 VAL.22 LYS.7 ASN.7 PRO.15 THR.10 PHE.9 ALA.32 HIS.13 GLY.17 ILE.8 LEU.25 ARG.19 TRP.4 GLU.14 TYR.7 SER.17
3sreA TOT.307 # CYS.3 GLN.5 ASP.20 SER.24 VAL.32 LYS.8 PRO.17 GLY.21 THR.17 PHE.16 ALA.15 HIS.13 MET.3 ILE.21 GLU.14 LEU.35 ARG.6 TRP.4 ASN.20 TYR.13
4ckmA TOT.139 # MET.3 ASP.9 GLN.4 VAL.15 LYS.3 ILE.2 PRO.9 THR.12 PHE.8 ASN.4 GLY.11 HIS.4 LEU.21 ARG.10 ALA.4 GLU.10 TYR.4 SER.6
2fx5A TOT.258 # CYS.4 MET.5 HIS.6 VAL.15 GLN.12 LYS.1 ILE.5 PRO.19 THR.18 PHE.10 ALA.23 GLY.37 ASP.11 GLU.7 LEU.18 ARG.21 TRP.5 ASN.7 TYR.12 SER.22
2a5yB TOT.501 # CYS.12 ASP.37 GLN.17 VAL.33 LYS.27 PRO.21 GLY.16 THR.23 PHE.27 ASN.17 HIS.11 MET.17 ILE.35 LEU.62 ARG.29 TRP.3 ALA.28 GLU.39 TYR.12 SER.35
3o7qA TOT.414 # CYS.8 GLN.18 ILE.39 SER.30 VAL.24 GLY.31 PRO.17 LYS.10 THR.22 PHE.35 ALA.51 HIS.7 MET.11 ASP.7 GLU.7 LEU.52 ARG.11 TRP.6 ASN.13 TYR.15
2ejbA TOT.176 # CYS.3 GLN.3 ILE.14 SER.10 ASN.11 VAL.23 LYS.11 PRO.7 THR.5 PHE.4 ALA.9 HIS.6 GLY.11 ASP.6 LEU.23 ARG.9 GLU.12 TYR.5 MET.4
2b3rA TOT.124 # GLN.3 ILE.4 SER.11 VAL.8 LYS.12 PRO.5 GLY.7 THR.12 PHE.5 GLU.7 HIS.2 MET.3 ASP.5 LEU.16 ARG.7 TRP.1 ALA.4 ASN.6 TYR.6
4owtC TOT.39 # ILE.3 GLN.4 VAL.1 LYS.1 PRO.2 THR.1 PHE.2 ALA.7 GLY.2 HIS.4 LEU.5 ARG.1 ASP.1 ASN.1 TYR.1 SER.3
4owtB TOT.72 # CYS.2 MET.1 ILE.9 VAL.8 GLN.2 LYS.4 ASN.3 PRO.2 THR.6 PHE.4 ALA.1 GLY.5 ASP.6 LEU.7 ARG.2 TRP.1 GLU.3 TYR.2 SER.4
3ttgA TOT.333 # CYS.2 ILE.17 SER.30 GLN.11 LYS.20 ASN.17 PRO.17 THR.16 PHE.30 ALA.14 HIS.7 GLY.28 ASP.19 LEU.41 ARG.15 TRP.1 VAL.17 GLU.21 TYR.10
4oqzA TOT.283 # MET.11 HIS.7 GLN.7 VAL.23 LYS.6 ILE.9 PRO.12 THR.13 PHE.8 ALA.49 GLY.27 ASP.20 ASN.7 LEU.25 ARG.15 TRP.3 GLU.12 TYR.11 SER.18
3edhA TOT.192 # CYS.6 GLN.7 HIS.8 SER.10 VAL.16 GLY.17 ILE.13 PRO.11 LYS.8 THR.11 PHE.11 ASN.4 MET.3 ASP.10 LEU.7 ARG.18 TRP.3 ALA.9 GLU.12 TYR.8
4uy3A TOT.191 # CYS.1 ASP.14 VAL.7 GLN.13 LYS.18 PRO.3 GLY.4 THR.5 PHE.5 GLU.22 HIS.5 MET.6 ILE.10 LEU.19 ARG.8 ALA.16 ASN.15 TYR.10 SER.10
2vclA TOT.199 # CYS.2 THR.12 GLN.4 ASP.20 SER.8 VAL.11 LYS.18 ASN.11 PRO.8 HIS.4 PHE.18 ALA.8 GLY.13 ILE.11 LEU.14 ARG.7 TRP.3 GLU.14 TYR.13
4q9vA TOT.182 # CYS.3 ILE.14 SER.12 GLN.5 LYS.20 ASN.11 PRO.2 GLY.4 THR.10 PHE.9 ALA.8 MET.3 HIS.9 LEU.22 ARG.8 ASP.10 VAL.13 GLU.14 TYR.5
3facA TOT.108 # CYS.7 GLN.2 ASP.4 SER.3 VAL.8 LYS.2 PRO.3 THR.7 PHE.4 ALA.10 HIS.4 GLY.10 ILE.4 GLU.8 LEU.8 ARG.13 TRP.2 ASN.5 TYR.3 MET.1
2gqpA TOT.198 # CYS.1 GLN.4 ASP.12 SER.16 VAL.14 LYS.15 PRO.2 THR.14 PHE.8 ALA.10 HIS.4 GLY.11 ILE.16 GLU.13 LEU.23 ARG.7 TRP.4 ASN.15 TYR.4 MET.5
4dplA TOT.354 # CYS.1 HIS.7 SER.15 GLN.10 VAL.30 LYS.25 ILE.29 PRO.27 THR.19 PHE.11 ASN.9 GLY.30 ASP.21 LEU.30 ARG.17 TRP.3 ALA.27 GLU.25 TYR.11 MET.7
2cwjA TOT.116 # CYS.1 GLN.2 ILE.6 SER.7 VAL.13 LYS.5 ASN.4 PRO.9 THR.4 PHE.6 ALA.13 GLY.10 ASP.4 LEU.7 ARG.5 GLU.11 TYR.7 MET.2
3vc1A TOT.277 # CYS.4 GLN.7 ASP.21 SER.17 VAL.20 LYS.6 ILE.11 PRO.12 THR.13 PHE.9 ALA.25 GLY.21 HIS.13 ASN.11 LEU.22 ARG.25 TRP.5 GLU.17 TYR.12 MET.6
3f02C TOT.35 # HIS.2 GLN.1 VAL.4 GLY.2 ILE.3 PRO.3 THR.3 PHE.4 ASN.1 MET.2 ASP.1 LEU.3 ARG.4 GLU.1 TYR.1
3f02A TOT.322 # ILE.19 SER.24 GLN.14 MET.13 PRO.8 LYS.20 THR.11 PHE.20 ASN.22 HIS.4 GLY.17 ASP.15 LEU.28 ARG.9 TRP.3 ALA.25 VAL.25 GLU.32 TYR.13
1tuhA TOT.131 # CYS.2 GLN.2 ASP.9 ASN.6 VAL.7 LYS.6 PRO.1 GLY.17 THR.7 PHE.9 ALA.11 HIS.5 MET.1 ILE.6 LEU.7 ARG.13 TRP.3 GLU.11 TYR.4 SER.4
3l7nA TOT.234 # CYS.3 GLN.15 ASP.18 SER.15 THR.11 LYS.15 PRO.11 GLY.15 HIS.7 PHE.10 ASN.2 MET.9 ILE.13 LEU.24 ARG.5 TRP.2 ALA.21 VAL.10 GLU.15 TYR.13
3a1dA TOT.268 # GLN.5 HIS.3 SER.11 VAL.32 LYS.20 ASN.8 PRO.7 THR.8 PHE.3 ALA.34 GLY.22 ILE.21 LEU.28 ARG.14 TRP.1 ASP.17 GLU.31 MET.3
1uouA TOT.433 # CYS.7 ASP.22 SER.22 GLN.25 VAL.37 LYS.11 ASN.3 PRO.25 THR.15 PHE.7 ALA.60 HIS.6 GLY.48 ILE.11 LEU.69 ARG.29 TRP.4 GLU.22 TYR.1 MET.9
3gn3A TOT.177 # CYS.2 GLN.5 ILE.9 SER.13 VAL.13 MET.5 PRO.10 LYS.7 THR.7 PHE.10 ALA.20 HIS.9 GLY.14 ASP.8 GLU.11 LEU.14 ARG.8 TRP.4 ASN.6 TYR.2
3fo8D TOT.274 # GLN.5 ASP.18 SER.24 VAL.16 LYS.20 ASN.11 PRO.10 THR.19 PHE.6 ALA.32 GLY.29 ILE.30 LEU.15 ARG.4 TRP.3 GLU.17 TYR.13 MET.2
2qskA TOT.95 # CYS.10 ASP.4 SER.11 GLN.4 LYS.5 PRO.9 THR.6 PHE.2 ALA.8 GLY.15 HIS.1 GLU.2 ARG.5 TRP.2 ASN.9 TYR.2
4d1lA TOT.38 # ILE.2 GLN.1 VAL.3 LYS.3 PRO.1 THR.1 PHE.1 ASN.1 GLY.1 ASP.3 LEU.5 ARG.4 ALA.2 GLU.5 TYR.2 SER.3
1s8nA TOT.190 # MET.8 ASP.12 VAL.16 GLN.4 LYS.9 PRO.7 THR.9 PHE.4 ALA.25 HIS.2 GLY.10 ILE.13 LEU.20 ARG.19 TRP.1 GLU.22 TYR.2 SER.7
4r1bA TOT.260 # CYS.8 GLN.5 HIS.7 SER.14 VAL.15 LYS.17 ILE.16 PRO.17 THR.15 PHE.14 ALA.15 GLY.15 ASP.15 ASN.24 LEU.18 ARG.6 TRP.4 GLU.17 TYR.13 MET.5
2xesA TOT.226 # CYS.3 GLN.11 ILE.13 SER.18 VAL.11 LYS.14 ASN.8 PRO.13 THR.11 PHE.7 ALA.11 HIS.4 GLY.6 ASP.13 LEU.45 ARG.18 TRP.1 GLU.13 TYR.6
4l63A TOT.245 # CYS.2 ILE.23 SER.22 GLN.5 LYS.7 PRO.11 THR.15 PHE.9 GLU.14 HIS.6 GLY.22 ASP.10 LEU.18 ARG.17 TRP.1 ALA.10 VAL.14 ASN.23 TYR.12 MET.4
4rniA TOT.253 # CYS.3 MET.6 HIS.6 VAL.16 GLN.15 LYS.7 ASN.3 PRO.12 ASP.13 THR.5 PHE.10 ALA.25 GLY.21 ILE.14 LEU.36 ARG.17 TRP.3 GLU.21 TYR.6 SER.14
3cw9A TOT.495 # CYS.3 GLN.24 ASP.23 SER.24 VAL.53 LYS.8 ILE.23 PRO.28 THR.28 PHE.16 ALA.65 GLY.39 HIS.13 ASN.10 LEU.51 ARG.35 TRP.3 GLU.29 TYR.10 MET.10
3pevB TOT.288 # CYS.3 ILE.24 SER.14 GLN.17 LYS.23 PRO.12 THR.17 PHE.15 ALA.20 HIS.7 GLY.12 ASP.10 GLU.18 LEU.35 ARG.13 TRP.8 VAL.13 ASN.21 TYR.6
1yh2A TOT.156 # CYS.2 ASP.9 SER.8 GLN.8 LYS.11 PRO.17 THR.7 PHE.5 ASN.6 HIS.3 GLY.7 ILE.11 LEU.16 ARG.10 TRP.3 ALA.11 VAL.4 GLU.9 TYR.4 MET.5
1nw1A TOT.353 # CYS.7 GLN.10 HIS.13 SER.22 VAL.20 MET.7 PRO.19 LYS.15 ASP.17 THR.14 PHE.22 ALA.18 GLY.18 ILE.17 GLU.30 LEU.50 ARG.18 TRP.6 ASN.16 TYR.14
2dclA TOT.99 # ILE.12 GLN.1 VAL.14 MET.3 ASN.4 PRO.4 LYS.6 ASP.4 THR.6 PHE.1 ALA.2 GLY.10 HIS.2 LEU.6 ARG.6 TRP.3 GLU.11 TYR.4
2hxsA TOT.178 # CYS.3 MET.3 ILE.12 VAL.13 GLN.11 LYS.15 ASN.7 PRO.3 THR.13 PHE.10 ALA.7 HIS.4 GLY.17 ASP.8 LEU.19 ARG.5 TRP.2 GLU.10 TYR.6 SER.10
4p53A TOT.359 # CYS.3 ASP.22 GLN.9 VAL.36 MET.11 PRO.17 LYS.7 THR.16 PHE.9 GLU.22 HIS.17 GLY.25 ILE.13 LEU.54 ARG.26 TRP.3 ALA.43 ASN.6 TYR.6 SER.14
4h9dA TOT.95 # CYS.4 GLN.2 ILE.4 SER.5 VAL.9 LYS.8 PRO.5 ASP.2 THR.2 PHE.2 ASN.5 GLY.5 HIS.2 LEU.7 ARG.9 TRP.3 ALA.3 GLU.14 TYR.4
4k3fA TOT.236 # GLN.8 ASP.17 SER.10 VAL.21 LYS.23 ASN.14 PRO.15 THR.13 PHE.6 ALA.28 HIS.4 GLY.11 ILE.14 LEU.26 ARG.5 GLU.14 TYR.7
1y0eA TOT.215 # CYS.3 GLN.10 ILE.18 ASN.5 VAL.21 LYS.12 PRO.8 THR.15 PHE.6 ALA.20 HIS.6 GLY.13 ASP.16 LEU.19 ARG.8 GLU.16 TYR.8 SER.11
3m31A TOT.357 # CYS.9 MET.7 ASP.31 GLN.12 VAL.14 LYS.27 PRO.7 THR.20 PHE.25 ASN.27 HIS.3 GLY.19 ILE.20 LEU.38 ARG.14 TRP.7 ALA.22 GLU.22 TYR.14 SER.19
3fkyA TOT.335 # CYS.7 MET.10 GLN.9 HIS.10 ASN.15 VAL.15 LYS.18 PRO.18 ASP.21 THR.13 PHE.13 ALA.28 GLY.34 ILE.22 LEU.16 ARG.20 TRP.7 GLU.22 TYR.20 SER.17
2ip6A TOT.84 # ILE.6 SER.2 GLN.9 LYS.7 ASN.4 PRO.2 THR.6 PHE.3 ALA.8 GLY.1 HIS.4 LEU.11 ARG.3 ASP.4 VAL.5 GLU.6 TYR.3
3h79A TOT.115 # GLN.5 HIS.2 SER.11 VAL.12 MET.5 ILE.4 PRO.6 LYS.4 THR.6 PHE.7 ALA.4 GLY.3 ASP.10 ASN.2 LEU.7 ARG.11 TRP.2 GLU.7 TYR.7
1vykA TOT.129 # ILE.7 SER.11 GLN.6 LYS.14 ASN.5 PRO.11 THR.6 PHE.3 ALA.12 HIS.1 GLY.3 ASP.7 LEU.15 ARG.7 TRP.1 VAL.7 GLU.8 TYR.5
1jpdX TOT.316 # CYS.7 HIS.6 SER.16 GLN.15 GLY.19 ILE.14 PRO.17 LYS.11 THR.21 PHE.5 ALA.42 MET.9 ASP.16 GLU.24 LEU.42 ARG.15 TRP.5 VAL.22 ASN.7 TYR.3
1l8dA TOT.103 # CYS.2 ILE.8 SER.3 GLN.1 LYS.16 PRO.1 GLY.4 THR.7 ALA.3 HIS.2 MET.1 ASP.5 GLU.18 LEU.16 ARG.9 VAL.1 ASN.5 TYR.1
4hvzA TOT.214 # GLN.5 ILE.14 SER.12 VAL.21 GLY.15 ASN.16 PRO.12 LYS.11 THR.13 PHE.2 ALA.28 MET.9 ASP.12 LEU.16 ARG.12 GLU.12 TYR.4
3k26A TOT.360 # CYS.12 ASP.30 SER.29 VAL.20 GLN.11 LYS.22 ILE.26 PRO.12 THR.15 PHE.14 ALA.18 GLY.19 HIS.15 GLU.15 LEU.30 ARG.19 TRP.11 ASN.20 TYR.13 MET.9
2zqoA TOT.130 # CYS.1 GLN.10 ASP.10 SER.8 VAL.5 LYS.12 THR.5 PRO.8 HIS.3 PHE.5 ASN.8 GLY.9 ILE.15 LEU.6 ARG.3 TRP.4 ALA.9 GLU.7 TYR.2
1d7mA TOT.101 # MET.2 ILE.3 VAL.1 GLN.3 LYS.12 THR.2 ASN.4 GLY.2 ASP.4 LEU.21 ARG.8 ALA.11 GLU.21 SER.7
3a2zA TOT.190 # CYS.2 GLN.10 ILE.11 SER.8 VAL.14 LYS.5 ASN.7 PRO.9 THR.11 PHE.11 ALA.12 HIS.4 GLY.16 ASP.15 LEU.16 ARG.8 TRP.5 GLU.13 TYR.9 MET.4
3kt9A TOT.102 # CYS.3 ILE.6 SER.4 GLN.9 LYS.9 ASN.3 PRO.5 THR.3 PHE.1 ALA.2 HIS.3 GLY.6 ASP.4 LEU.7 ARG.7 TRP.1 VAL.15 GLU.8 TYR.3 MET.3
2hgsA TOT.472 # CYS.3 GLN.30 ASP.21 SER.32 VAL.33 LYS.22 ASN.17 PRO.21 THR.17 PHE.17 ALA.49 HIS.8 GLY.31 ILE.22 LEU.59 ARG.29 TRP.3 GLU.38 TYR.12 MET.8
4bboA TOT.113 # CYS.2 ASP.2 GLN.5 VAL.5 LYS.1 ASN.12 PRO.1 THR.17 PHE.6 ALA.12 GLY.15 ILE.4 LEU.7 TRP.6 GLU.2 TYR.4 SER.12
3l7wA TOT.102 # ILE.11 SER.9 GLN.3 LYS.10 PRO.2 THR.7 TRP.1 ALA.4 GLY.6 HIS.5 LEU.12 ARG.5 ASP.4 VAL.5 GLU.6 TYR.12
3wmm1 TOT.55 # ILE.7 SER.2 GLN.2 LYS.1 PRO.2 GLY.2 THR.2 PHE.2 ALA.3 HIS.1 MET.2 ASP.4 LEU.10 ARG.2 TRP.2 VAL.5 ASN.4 TYR.2
3wmm0 TOT.40 # HIS.2 GLN.1 VAL.2 MET.2 ILE.2 PRO.1 LYS.1 THR.2 PHE.3 ALA.5 GLY.2 ASP.2 LEU.6 ARG.1 TRP.3 GLU.2 TYR.2 SER.1
3wg9A TOT.209 # CYS.1 MET.3 ILE.21 GLN.4 VAL.14 LYS.16 ASN.16 PRO.5 THR.9 PHE.9 ALA.10 HIS.2 GLY.14 ASP.14 LEU.24 ARG.13 TRP.1 GLU.14 TYR.9 SER.10
4ix7A TOT.108 # CYS.4 GLN.3 ASP.6 SER.7 VAL.10 LYS.12 PRO.6 THR.9 PHE.4 ALA.8 HIS.2 GLY.3 ILE.8 GLU.5 LEU.6 ARG.5 TRP.1 ASN.9
1ujcA TOT.156 # CYS.5 MET.5 ILE.4 VAL.15 GLN.5 LYS.3 PRO.10 ASP.7 THR.10 PHE.4 ASN.7 GLY.11 HIS.2 LEU.21 ARG.5 TRP.2 ALA.13 GLU.12 TYR.2 SER.13
3o21A TOT.369 # CYS.4 GLN.22 ILE.23 SER.22 VAL.30 LYS.11 TRP.5 PRO.11 THR.22 PHE.25 ALA.24 GLY.21 HIS.9 ASN.23 LEU.26 ARG.23 ASP.17 GLU.21 TYR.18 MET.12
2ynqA TOT.149 # ILE.11 SER.10 GLN.13 LYS.10 ASN.3 PRO.3 THR.10 PHE.1 ALA.7 GLY.3 ASP.11 LEU.15 ARG.7 TRP.1 VAL.5 GLU.24 TYR.12 MET.3
1fxlA TOT.167 # CYS.1 MET.2 ILE.15 VAL.10 GLN.9 LYS.13 PRO.6 THR.12 PHE.7 ALA.9 GLY.14 ASP.6 GLU.11 LEU.14 ARG.10 ASN.8 TYR.6 SER.14
3ee4A TOT.289 # CYS.4 ASP.24 SER.12 GLN.9 LYS.7 ASN.7 PRO.12 THR.16 PHE.15 ALA.34 HIS.7 GLY.18 ILE.13 LEU.27 ARG.25 TRP.7 VAL.12 GLU.21 TYR.10 MET.9
2xioA TOT.288 # CYS.10 ILE.19 VAL.15 GLN.10 MET.7 ASN.16 PRO.11 LYS.22 THR.16 PHE.17 ALA.16 GLY.21 HIS.9 LEU.29 ARG.10 TRP.2 ASP.20 GLU.20 TYR.6 SER.12
4nf0A TOT.289 # ASP.12 SER.21 GLN.15 LYS.22 ASN.11 PRO.11 THR.16 PHE.11 ALA.29 HIS.6 GLY.15 ILE.10 LEU.34 ARG.13 TRP.5 VAL.18 GLU.24 TYR.9 MET.7
3tosA TOT.247 # CYS.1 ILE.7 GLN.7 VAL.22 LYS.6 TRP.2 PRO.21 THR.16 PHE.13 ALA.18 GLY.18 HIS.6 GLU.16 LEU.31 ARG.20 ASP.18 ASN.8 TYR.11 SER.6
4en2A TOT.255 # CYS.1 GLN.7 ILE.19 SER.23 VAL.24 LYS.21 ASN.13 PRO.14 THR.10 PHE.13 ALA.7 HIS.6 GLY.15 ASP.9 LEU.19 ARG.17 TRP.4 GLU.19 TYR.9 MET.5
3ir3A TOT.118 # CYS.2 GLN.2 ASP.3 SER.9 VAL.15 MET.4 ASN.3 PRO.6 LYS.6 THR.7 PHE.6 ALA.10 HIS.2 GLY.9 ILE.10 LEU.11 ARG.4 TRP.1 GLU.7 TYR.1
2cvlA TOT.121 # CYS.2 ASP.5 GLN.4 VAL.17 LYS.4 ASN.2 PRO.9 THR.6 PHE.6 ALA.20 GLY.10 ILE.3 LEU.8 ARG.8 GLU.9 TYR.4 SER.4
2xy2A TOT.189 # CYS.4 ILE.17 SER.14 GLN.11 LYS.8 ASN.11 PRO.5 THR.11 PHE.6 ALA.13 HIS.1 GLY.10 ASP.8 LEU.11 ARG.11 TRP.2 VAL.20 GLU.19 TYR.6 MET.1
3os7A TOT.330 # CYS.5 ASP.20 GLN.7 VAL.24 LYS.35 PRO.15 THR.15 PHE.19 GLU.27 HIS.6 GLY.20 ILE.23 LEU.22 ARG.9 TRP.6 ALA.13 ASN.22 TYR.14 SER.28
1f7dA TOT.118 # CYS.1 ILE.16 SER.6 GLN.3 VAL.10 LYS.11 ASN.1 PRO.4 THR.2 ALA.4 HIS.2 GLY.16 ASP.6 LEU.14 ARG.4 TRP.1 GLU.9 TYR.3 MET.5
3prnA TOT.289 # GLN.9 ASP.29 SER.25 VAL.26 LYS.4 ASN.16 PRO.1 THR.22 PHE.16 ALA.34 GLY.35 ILE.13 LEU.14 ARG.8 TRP.5 GLU.9 TYR.19 MET.4
4hxdB TOT.157 # CYS.2 ILE.11 SER.11 VAL.14 GLN.5 LYS.8 ASN.5 PRO.5 ASP.10 THR.11 PHE.9 ALA.10 GLY.9 HIS.5 LEU.12 ARG.6 TRP.3 GLU.12 TYR.6 MET.3
3f3xA TOT.139 # GLN.4 ILE.12 SER.9 VAL.11 LYS.11 ASN.10 PRO.2 THR.5 PHE.3 ALA.8 GLY.5 ASP.6 LEU.19 ARG.12 GLU.13 TYR.4 MET.5
4gpkA TOT.343 # CYS.4 GLN.14 ASP.19 SER.13 VAL.14 LYS.33 ASN.12 PRO.2 GLY.12 THR.9 PHE.11 ALA.22 HIS.8 MET.10 ILE.22 LEU.51 ARG.15 TRP.2 GLU.36 TYR.34
1tk9A TOT.183 # CYS.6 GLN.8 ILE.16 SER.13 VAL.9 LYS.17 THR.6 PRO.2 HIS.5 PHE.5 ALA.16 GLY.19 ASP.8 GLU.15 LEU.23 ARG.4 TRP.1 ASN.8 TYR.2
2ogkA TOT.126 # CYS.1 GLN.3 ILE.10 SER.10 VAL.12 LYS.9 TRP.2 PRO.3 THR.7 PHE.5 ALA.7 GLY.6 HIS.2 GLU.17 LEU.15 ARG.6 ASP.5 ASN.2 TYR.3 MET.1
4x0jA TOT.260 # CYS.2 MET.2 GLN.8 ASP.14 ASN.13 VAL.23 LYS.28 THR.14 PHE.2 ALA.43 HIS.10 GLY.14 ILE.8 LEU.21 ARG.11 TRP.2 GLU.24 TYR.3 SER.18
2arhA TOT.196 # CYS.1 ILE.7 SER.7 GLN.4 LYS.22 TRP.3 PRO.8 THR.6 PHE.17 ASN.8 GLY.16 HIS.3 LEU.24 ARG.11 ASP.5 ALA.5 VAL.10 GLU.31 TYR.8
4cqeA TOT.250 # CYS.3 GLN.12 ASP.12 SER.16 VAL.15 LYS.18 ILE.19 PRO.11 THR.11 PHE.8 ALA.13 GLY.18 HIS.8 GLU.15 LEU.22 ARG.16 TRP.4 ASN.11 TYR.8 MET.10
2px0A TOT.258 # CYS.3 ILE.17 SER.17 GLN.12 LYS.24 PRO.10 THR.22 PHE.14 ASN.7 HIS.4 GLY.13 ASP.10 LEU.26 ARG.7 TRP.1 ALA.17 VAL.17 GLU.24 TYR.8 MET.5
2bfwA TOT.196 # CYS.3 ASP.10 SER.17 VAL.11 GLN.2 LYS.15 PRO.5 THR.5 PHE.13 ASN.5 HIS.1 GLY.19 ILE.16 LEU.20 ARG.12 TRP.2 ALA.12 GLU.19 TYR.3 MET.6
4v28A TOT.341 # CYS.2 GLN.9 ASP.19 SER.25 VAL.12 LYS.15 ILE.25 PRO.21 THR.26 PHE.17 ASN.16 GLY.27 HIS.7 LEU.20 ARG.18 TRP.11 ALA.23 GLU.16 TYR.26 MET.6
3f6gA TOT.117 # CYS.1 MET.3 ILE.14 VAL.6 GLN.6 LYS.10 PRO.5 ASP.5 THR.10 PHE.2 ALA.7 GLY.10 HIS.5 GLU.7 LEU.8 ARG.4 TRP.1 ASN.5 TYR.3 SER.5
3dasA TOT.329 # GLN.7 ILE.11 SER.23 VAL.18 LYS.16 ASN.8 PRO.25 THR.17 PHE.8 ALA.31 HIS.4 GLY.51 ASP.25 LEU.28 ARG.19 TRP.8 GLU.20 TYR.10
4mjgA TOT.173 # CYS.2 GLN.7 ILE.8 SER.12 VAL.21 LYS.5 ASN.5 PRO.15 THR.14 PHE.7 ALA.12 HIS.2 GLY.13 ASP.11 LEU.12 ARG.7 TRP.1 GLU.14 TYR.5
4jgxA TOT.119 # GLN.6 ILE.8 SER.8 VAL.7 LYS.17 PRO.2 THR.4 PHE.5 ALA.11 HIS.1 GLY.11 ASP.11 GLU.4 LEU.10 ARG.2 TRP.1 ASN.8 TYR.1 MET.2
3jr7A TOT.272 # CYS.10 GLN.10 ILE.18 ASN.9 VAL.24 LYS.22 TRP.1 PRO.5 THR.15 PHE.7 ALA.23 GLY.19 HIS.5 LEU.20 ARG.9 ASP.14 GLU.29 TYR.10 SER.22
3t4xA TOT.251 # CYS.1 GLN.9 ILE.24 SER.19 VAL.18 LYS.12 TRP.1 PRO.11 THR.20 PHE.7 ASN.13 GLY.17 HIS.3 LEU.25 ARG.13 ASP.8 ALA.20 GLU.25 TYR.5
2if6A TOT.182 # CYS.1 ASP.7 SER.13 GLN.17 LYS.17 ASN.4 PRO.10 THR.8 PHE.7 ALA.11 GLY.11 HIS.3 ILE.6 LEU.14 ARG.8 TRP.5 VAL.17 GLU.11 TYR.9 MET.3
4c91A TOT.745 # CYS.9 ASP.40 GLN.32 VAL.51 MET.29 PRO.42 LYS.20 THR.39 PHE.23 ASN.47 HIS.16 GLY.57 ILE.52 LEU.56 ARG.29 TRP.21 ALA.51 GLU.45 TYR.52 SER.34
3kvpA TOT.42 # GLN.1 ILE.2 SER.2 VAL.2 LYS.4 PRO.3 THR.1 PHE.2 GLU.7 GLY.2 HIS.2 LEU.2 ARG.1 ASP.3 ALA.1 ASN.3 TYR.4
2efeA TOT.246 # CYS.5 ASP.11 SER.24 GLN.10 LYS.18 ASN.17 PRO.11 GLY.6 THR.6 PHE.16 ALA.23 HIS.2 MET.7 ILE.16 LEU.23 ARG.9 TRP.2 VAL.12 GLU.22 TYR.6
4g9iA TOT.737 # CYS.11 GLN.11 ILE.54 SER.26 VAL.58 LYS.39 PRO.42 THR.27 PHE.32 ASN.32 HIS.20 GLY.56 ASP.39 LEU.69 ARG.46 TRP.2 ALA.67 GLU.66 TYR.40
3tl2A TOT.312 # GLN.6 ASP.20 SER.17 VAL.31 LYS.19 ASN.9 PRO.13 THR.18 PHE.8 ALA.30 GLY.29 HIS.2 ILE.25 LEU.31 ARG.15 GLU.21 TYR.10 MET.8
3k3fA TOT.332 # CYS.7 GLN.6 ILE.20 SER.15 VAL.29 MET.12 PRO.16 LYS.6 THR.24 PHE.30 ALA.33 HIS.2 GLY.38 ASP.5 GLU.8 LEU.47 ARG.9 TRP.4 ASN.14 TYR.7
2op5A TOT.101 # CYS.1 GLN.2 ILE.8 SER.10 VAL.8 LYS.6 ASN.5 THR.4 PHE.9 ALA.3 HIS.3 GLY.4 ASP.5 LEU.11 ARG.5 TRP.1 GLU.13 TYR.3
3a32A TOT.464 # CYS.1 GLN.5 ASP.22 SER.29 VAL.43 LYS.26 ILE.30 PRO.19 THR.13 PHE.32 ALA.37 GLY.36 HIS.11 GLU.45 LEU.41 ARG.35 TRP.2 ASN.9 TYR.17 MET.11
3pxpA TOT.277 # GLN.11 ILE.18 SER.15 VAL.17 LYS.5 PRO.12 ASP.13 THR.19 PHE.15 GLU.22 GLY.13 HIS.7 LEU.31 ARG.27 TRP.5 ALA.24 ASN.11 TYR.12
4lf0A TOT.340 # CYS.8 ASP.19 SER.14 GLN.11 LYS.21 PRO.15 THR.20 PHE.11 ALA.29 HIS.8 GLY.32 ILE.26 GLU.25 LEU.15 ARG.13 TRP.6 VAL.22 ASN.16 TYR.16 MET.13
3ivpA TOT.113 # ILE.7 SER.8 GLN.6 LYS.12 PRO.3 THR.4 PHE.4 ASN.5 HIS.1 GLY.6 ASP.9 LEU.12 ARG.6 ALA.7 VAL.10 GLU.10 TYR.3
4mphA TOT.181 # GLN.4 HIS.4 SER.15 VAL.10 LYS.18 TRP.2 PRO.7 THR.7 PHE.8 ALA.16 GLY.11 ILE.7 GLU.18 LEU.16 ARG.7 ASP.6 ASN.11 TYR.12 MET.2
2cksA TOT.305 # CYS.4 ILE.18 SER.25 VAL.18 GLN.12 LYS.9 ASN.13 PRO.13 THR.17 PHE.12 ALA.27 HIS.9 GLY.26 ASP.21 LEU.18 ARG.17 TRP.9 GLU.16 TYR.14 MET.7
2pcjA TOT.223 # GLN.3 ILE.16 SER.12 VAL.15 LYS.21 PRO.7 THR.11 PHE.7 ASN.8 GLY.21 HIS.3 LEU.31 ARG.12 ASP.7 ALA.13 GLU.25 TYR.6 MET.5
3e7lA TOT.60 # ILE.7 SER.5 VAL.1 LYS.11 ASN.2 THR.1 PHE.2 ALA.2 GLY.1 ASP.3 LEU.8 ARG.4 GLU.9 TYR.4
2qw7A TOT.96 # MET.2 GLN.3 ASP.5 ASN.5 VAL.14 LYS.6 PRO.3 THR.6 PHE.1 ALA.8 GLY.11 ILE.2 LEU.12 ARG.6 TRP.1 GLU.4 TYR.2 SER.5
1nkgA TOT.508 # CYS.5 GLN.15 ASP.26 SER.67 VAL.31 MET.12 ASN.22 PRO.20 LYS.11 THR.57 PHE.21 ALA.40 HIS.11 GLY.51 ILE.31 LEU.22 ARG.19 TRP.6 GLU.14 TYR.27
2qolA TOT.273 # CYS.4 ILE.21 SER.22 GLN.8 LYS.19 PRO.11 THR.10 PHE.10 GLU.16 HIS.4 GLY.17 ASP.17 LEU.25 ARG.15 TRP.5 ALA.16 VAL.22 ASN.11 TYR.10 MET.10
2ga1A TOT.97 # CYS.1 ILE.7 VAL.6 GLN.11 LYS.3 PRO.7 THR.5 ALA.11 HIS.1 GLY.5 ASP.4 GLU.6 LEU.11 ARG.5 TRP.2 ASN.6 TYR.5 SER.1
3p8rA TOT.264 # CYS.4 HIS.9 SER.11 GLN.16 LYS.6 ILE.14 PRO.8 THR.13 PHE.4 ALA.38 GLY.18 ASP.16 ASN.7 LEU.43 ARG.13 TRP.1 VAL.7 GLU.21 TYR.8 MET.7
3kwvC TOT.222 # MET.3 ILE.17 VAL.16 GLN.11 LYS.26 ASN.11 PRO.6 HIS.7 PHE.8 THR.6 GLY.8 ASP.15 LEU.20 ARG.2 ALA.14 GLU.27 TYR.14 SER.11
1hztA TOT.153 # CYS.4 MET.3 ASP.9 VAL.11 GLN.6 LYS.5 ILE.6 PRO.9 THR.9 PHE.6 ALA.15 GLY.7 HIS.3 GLU.9 LEU.14 ARG.11 TRP.6 ASN.6 TYR.4 SER.10
2vqeE TOT.150 # GLN.5 ASP.4 SER.2 VAL.14 LYS.8 ASN.4 PRO.8 THR.7 PHE.5 ALA.18 HIS.1 GLY.17 ILE.10 LEU.13 ARG.16 GLU.11 TYR.3 MET.4
4u9hL TOT.533 # CYS.8 ILE.26 SER.20 GLN.17 VAL.47 LYS.35 THR.34 PRO.31 HIS.20 PHE.23 ALA.56 GLY.40 ASP.30 GLU.29 LEU.39 ARG.25 TRP.8 ASN.16 TYR.22 MET.7
2vqeC TOT.206 # MET.1 ASP.5 VAL.22 GLN.10 LYS.11 ILE.13 PRO.5 THR.7 PHE.4 GLU.15 GLY.21 HIS.4 LEU.19 ARG.23 TRP.3 ALA.25 ASN.7 TYR.6 SER.5
2vqeB TOT.226 # GLN.10 HIS.5 SER.8 VAL.15 LYS.13 ASN.5 PRO.11 THR.8 PHE.10 ALA.19 GLY.13 ASP.13 ILE.20 LEU.23 ARG.20 TRP.2 GLU.20 TYR.6 MET.5
2vqeO TOT.88 # MET.2 ILE.5 VAL.5 GLN.5 LYS.7 ASN.1 PRO.3 THR.4 PHE.2 ALA.3 HIS.5 GLY.6 ASP.3 LEU.12 ARG.12 GLU.8 TYR.2 SER.3
2vqeN TOT.60 # CYS.4 HIS.1 GLN.1 VAL.4 LYS.7 PRO.2 THR.2 PHE.3 ALA.7 GLY.4 ILE.2 LEU.5 ARG.11 TRP.1 GLU.2 TYR.2 SER.2
2vqeM TOT.125 # CYS.1 GLN.1 ASP.3 ASN.5 VAL.10 LYS.13 ILE.7 PRO.5 THR.9 ALA.14 GLY.11 HIS.1 LEU.9 ARG.20 TRP.1 GLU.10 TYR.4 MET.1
2vqeL TOT.124 # CYS.1 GLN.2 ASP.3 SER.6 VAL.17 LYS.18 ASN.3 PRO.8 THR.7 PHE.1 ALA.8 HIS.3 GLY.12 ILE.4 LEU.7 ARG.14 GLU.5 TYR.5
2vqeK TOT.119 # CYS.1 ILE.8 SER.9 GLN.6 MET.2 PRO.6 LYS.10 THR.7 PHE.1 ALA.16 HIS.2 GLY.13 ASP.6 GLU.1 LEU.4 ARG.8 TRP.1 VAL.9 ASN.4 TYR.5
2vqeJ TOT.97 # HIS.4 SER.4 GLN.3 LYS.8 ILE.10 PRO.6 THR.7 PHE.4 ALA.5 GLY.5 ASP.5 ASN.3 LEU.8 ARG.12 VAL.6 GLU.6 MET.1
2vqeI TOT.127 # ASP.6 VAL.11 GLN.6 LYS.11 ASN.4 PRO.5 THR.4 PHE.5 ALA.15 HIS.1 GLY.14 ILE.4 LEU.10 ARG.16 GLU.5 TYR.8 SER.2
2vqeH TOT.138 # CYS.1 GLN.2 ILE.12 SER.5 VAL.13 LYS.9 ASN.1 PRO.9 THR.6 PHE.2 ALA.6 GLY.13 HIS.2 LEU.11 ARG.20 TRP.1 ASP.7 GLU.10 TYR.6 MET.2
2vqeT TOT.99 # GLN.4 ASP.1 SER.8 VAL.2 LYS.16 ASN.3 PRO.1 GLY.6 HIS.2 THR.2 ALA.17 MET.2 ILE.4 LEU.14 ARG.12 GLU.5
3wxfA TOT.299 # CYS.8 ILE.16 GLN.15 VAL.17 LYS.19 PRO.13 GLY.14 THR.12 PHE.19 ALA.14 HIS.6 MET.13 ASP.19 GLU.19 LEU.35 ARG.14 TRP.2 ASN.8 TYR.14 SER.22
3u9lA TOT.281 # GLN.8 HIS.8 SER.19 VAL.25 LYS.8 ASN.7 PRO.14 THR.8 PHE.10 ALA.41 GLY.25 ASP.21 ILE.20 LEU.22 ARG.22 TRP.2 GLU.15 TYR.6
2vqeQ TOT.104 # GLN.4 ILE.5 SER.7 VAL.13 LYS.15 ASN.1 PRO.5 THR.3 PHE.2 ALA.2 HIS.2 GLY.6 ASP.4 LEU.10 ARG.11 GLU.7 TYR.5 MET.2
2vqeP TOT.83 # MET.1 ASP.6 VAL.7 GLN.3 LYS.7 ASN.1 PRO.4 THR.5 PHE.2 ALA.6 HIS.2 GLY.5 ILE.4 LEU.5 ARG.13 TRP.2 GLU.3 TYR.5 SER.2
1es9A TOT.212 # CYS.2 GLN.10 ILE.8 SER.10 VAL.21 MET.3 PRO.13 LYS.7 THR.7 PHE.6 ASN.9 HIS.16 GLY.17 ASP.11 LEU.26 ARG.15 TRP.4 ALA.12 GLU.12 TYR.3
4u9hS TOT.265 # CYS.11 GLN.7 HIS.8 SER.10 VAL.16 LYS.12 ILE.14 PRO.22 THR.15 PHE.11 GLU.15 GLY.23 ASP.11 LEU.18 ARG.7 TRP.3 ALA.31 ASN.16 TYR.10 MET.5
3hmuA TOT.463 # CYS.6 GLN.12 ILE.37 SER.19 VAL.27 LYS.16 PRO.22 THR.20 PHE.13 ALA.54 HIS.19 GLY.43 ASP.20 GLU.40 LEU.34 ARG.24 TRP.8 ASN.22 TYR.12 MET.15
2v0cA TOT.809 # CYS.8 GLN.19 ILE.28 SER.17 VAL.53 MET.23 TRP.27 PRO.58 LYS.49 THR.39 PHE.36 GLU.89 GLY.58 HIS.19 LEU.80 ARG.55 ASP.37 ALA.65 ASN.17 TYR.32
1xlyA TOT.224 # GLN.7 HIS.4 GLY.4 SER.22 VAL.15 LYS.14 ASN.11 PRO.4 ASP.15 THR.13 PHE.14 ALA.13 MET.2 ILE.17 LEU.32 ARG.7 TRP.3 GLU.20 TYR.7
3s98A TOT.247 # CYS.6 ASP.11 GLN.11 VAL.22 LYS.19 PRO.12 THR.18 PHE.13 ALA.9 HIS.5 GLY.8 ILE.20 GLU.16 LEU.14 ARG.6 TRP.10 ASN.15 TYR.11 SER.21
3w20A TOT.242 # CYS.3 GLN.10 ASP.21 SER.10 VAL.11 LYS.7 ASN.5 PRO.11 THR.16 PHE.12 ALA.31 HIS.7 GLY.17 ILE.11 LEU.22 ARG.21 TRP.5 GLU.17 TYR.5
2gzxA TOT.243 # CYS.2 GLN.8 ILE.20 SER.11 VAL.18 LYS.17 ASN.7 PRO.11 ASP.17 THR.11 PHE.9 ALA.18 GLY.14 HIS.11 LEU.22 ARG.11 TRP.3 GLU.25 TYR.8
1x38A TOT.602 # CYS.8 GLN.19 ASP.39 SER.30 VAL.52 LYS.31 ASN.23 PRO.32 THR.42 PHE.20 ALA.54 GLY.63 HIS.10 ILE.33 LEU.48 ARG.28 TRP.8 GLU.24 TYR.20 MET.18
1jztA TOT.240 # CYS.5 ASP.9 VAL.23 GLN.12 LYS.19 ASN.9 PRO.19 THR.10 PHE.18 ALA.10 HIS.5 GLY.20 ILE.14 LEU.21 ARG.9 TRP.2 GLU.16 TYR.6 SER.13
3ipfA TOT.68 # ILE.5 VAL.6 GLN.4 LYS.6 PRO.2 THR.2 PHE.2 ALA.2 HIS.7 GLY.6 ASP.3 LEU.11 ARG.1 GLU.6 TYR.1 SER.4
3v2uA TOT.409 # CYS.2 ILE.38 SER.34 GLN.16 LYS.23 ASN.23 PRO.18 ASP.15 THR.22 PHE.19 ALA.28 GLY.31 HIS.10 LEU.39 ARG.14 TRP.3 VAL.23 GLU.21 TYR.21 MET.9
3me5A TOT.406 # CYS.6 GLN.22 ASP.29 SER.12 VAL.26 LYS.23 ASN.14 PRO.24 THR.17 PHE.22 ALA.40 HIS.17 GLY.23 ILE.23 LEU.39 ARG.29 TRP.4 GLU.25 TYR.11
4bz7A TOT.399 # CYS.9 THR.16 ASP.27 SER.31 GLN.12 MET.5 ASN.14 PRO.22 LYS.14 HIS.14 PHE.19 ALA.26 GLY.27 ILE.24 LEU.43 ARG.19 TRP.8 VAL.26 GLU.19 TYR.24
1u60A TOT.309 # CYS.5 GLN.20 ASP.16 SER.17 VAL.26 MET.6 PRO.13 LYS.9 THR.14 PHE.7 ALA.38 HIS.5 GLY.31 ILE.14 GLU.13 LEU.34 ARG.9 TRP.3 ASN.17 TYR.12
1dbhA TOT.332 # CYS.8 HIS.10 GLN.14 VAL.15 LYS.27 ILE.24 ASN.15 THR.8 PHE.18 ALA.23 GLY.16 ASP.18 LEU.37 ARG.16 TRP.2 PRO.10 GLU.35 TYR.12 SER.24
2rk3A TOT.186 # CYS.3 GLN.4 ASP.8 SER.9 VAL.19 LYS.15 ASN.6 PRO.9 THR.9 PHE.3 ALA.23 GLY.18 HIS.3 ILE.10 LEU.18 ARG.7 GLU.15 TYR.3 MET.4
4eqpA TOT.129 # GLN.5 ASP.7 SER.2 VAL.8 LYS.18 ASN.6 PRO.4 THR.7 PHE.4 ALA.13 GLY.9 HIS.2 ILE.4 LEU.12 ARG.5 TRP.1 GLU.11 TYR.7 MET.4
4dh4A TOT.114 # CYS.5 ASP.5 GLN.4 VAL.6 GLY.9 ASN.3 PRO.7 LYS.7 THR.8 PHE.5 ALA.16 HIS.1 MET.4 ILE.6 LEU.6 ARG.5 TRP.1 GLU.3 TYR.3 SER.10
3u3zA TOT.189 # CYS.7 HIS.7 SER.19 GLN.6 LYS.11 ILE.7 PRO.15 THR.10 PHE.5 ALA.11 GLY.11 ASP.5 GLU.10 LEU.22 ARG.7 TRP.5 VAL.20 ASN.3 TYR.5 MET.3
4kg3A TOT.138 # CYS.2 GLN.6 ASP.10 SER.12 VAL.6 LYS.13 PRO.4 THR.3 PHE.9 ASN.10 HIS.1 GLY.6 ILE.17 LEU.8 ARG.8 TRP.3 ALA.2 GLU.9 TYR.5 MET.4
4e4jA TOT.399 # CYS.5 MET.14 ASP.19 VAL.32 GLN.9 LYS.32 ILE.36 PRO.20 THR.20 PHE.17 GLU.29 GLY.24 HIS.4 LEU.38 ARG.15 TRP.2 ALA.18 ASN.30 TYR.15 SER.20
3tkfA TOT.310 # CYS.3 MET.6 ILE.29 VAL.25 GLN.12 LYS.30 ASN.18 PRO.7 THR.17 PHE.10 ALA.30 HIS.3 GLY.13 ASP.19 LEU.30 ARG.9 TRP.3 GLU.22 TYR.7 SER.17
4ar9A TOT.369 # GLN.6 ILE.25 SER.32 VAL.16 LYS.24 ASN.38 PRO.9 THR.20 PHE.18 ALA.12 HIS.9 GLY.26 ASP.25 LEU.30 ARG.9 TRP.5 GLU.27 TYR.32 MET.6
3kgwA TOT.377 # CYS.7 GLN.15 ILE.22 SER.23 VAL.28 MET.10 PRO.23 LYS.13 THR.23 PHE.10 GLU.24 HIS.15 GLY.32 ASP.12 LEU.48 ARG.20 TRP.4 ALA.24 ASN.11 TYR.13
2dlaA TOT.222 # GLN.4 ILE.23 SER.10 VAL.15 LYS.21 PRO.8 THR.3 PHE.12 GLU.27 GLY.10 ASP.16 LEU.21 ARG.14 TRP.1 ALA.11 ASN.7 TYR.12 MET.7
4g2sA TOT.106 # CYS.1 GLN.5 ASP.6 SER.9 VAL.7 LYS.1 ASN.5 PRO.8 THR.6 PHE.5 ALA.4 HIS.2 GLY.8 ILE.9 LEU.15 ARG.4 TRP.1 GLU.9 TYR.1
3ttzA TOT.194 # GLN.10 HIS.5 SER.7 VAL.19 LYS.10 ILE.16 PRO.4 THR.13 PHE.4 ASN.9 GLY.15 ASP.12 LEU.13 ARG.12 TRP.2 ALA.10 GLU.21 TYR.10 MET.2
3bgeA TOT.163 # CYS.1 GLN.6 HIS.2 SER.6 VAL.8 LYS.7 TRP.2 PRO.11 THR.7 PHE.5 ALA.25 GLY.9 ILE.8 GLU.8 LEU.15 ARG.12 ASP.11 ASN.7 TYR.11 MET.2
3k6rA TOT.251 # HIS.8 ASN.9 VAL.28 LYS.25 PRO.16 ASP.13 THR.8 PHE.9 ALA.16 GLY.13 ILE.20 LEU.27 ARG.16 TRP.2 GLU.22 TYR.12 SER.7
1k38A TOT.238 # THR.9 ASP.18 VAL.15 GLN.8 LYS.12 ASN.8 PRO.9 MET.5 HIS.3 PHE.15 ALA.22 GLY.15 ILE.14 LEU.18 ARG.24 TRP.10 GLU.15 TYR.6 SER.12
2nxoA TOT.270 # CYS.4 ASP.21 SER.10 GLN.6 LYS.9 ASN.4 PRO.17 THR.17 PHE.14 ALA.28 HIS.3 GLY.18 ILE.7 LEU.36 ARG.19 TRP.5 VAL.25 GLU.18 TYR.6 MET.3
3v4gA TOT.145 # CYS.2 GLN.7 ILE.8 SER.9 VAL.13 LYS.9 PRO.3 GLY.11 THR.10 PHE.7 GLU.12 HIS.2 MET.4 ASP.6 LEU.17 ARG.7 ALA.11 ASN.5 TYR.2
4hh8A TOT.206 # CYS.4 GLN.10 ILE.11 SER.19 VAL.21 LYS.7 THR.3 PRO.13 HIS.4 PHE.7 ALA.15 GLY.14 ASP.9 ASN.5 LEU.13 ARG.14 TRP.3 GLU.30 TYR.4
3wz1A TOT.277 # GLN.6 ILE.12 SER.18 VAL.16 LYS.12 PRO.21 THR.17 PHE.10 GLU.14 HIS.8 GLY.25 ASP.22 LEU.15 ARG.14 TRP.13 ALA.20 ASN.12 TYR.18 MET.4
2q4fA TOT.140 # CYS.4 GLN.18 ILE.4 SER.9 VAL.12 MET.5 ASN.4 PRO.2 LYS.6 THR.6 PHE.10 ALA.13 HIS.1 GLY.5 ASP.12 LEU.16 ARG.6 GLU.5 TYR.2
2eg4A TOT.230 # CYS.4 GLN.6 ASP.7 SER.10 VAL.14 LYS.7 ASN.3 PRO.20 THR.10 PHE.7 ALA.18 HIS.6 GLY.22 ILE.1 LEU.38 ARG.20 TRP.4 GLU.26 TYR.5 MET.2
3sd2A TOT.79 # CYS.3 GLN.2 HIS.3 SER.6 VAL.5 LYS.5 PRO.3 THR.9 PHE.2 ALA.4 GLY.5 ILE.12 GLU.5 LEU.5 ASP.2 ASN.5 TYR.3
3oa4A TOT.138 # CYS.1 MET.2 ILE.14 GLN.6 VAL.10 LYS.13 PRO.7 THR.1 PHE.5 ALA.9 GLY.12 HIS.4 GLU.17 LEU.13 ARG.5 ASP.4 ASN.4 TYR.2 SER.9
2bskB TOT.55 # CYS.4 ASP.3 SER.5 GLN.1 LYS.4 ASN.1 PRO.2 THR.2 ALA.3 GLY.2 HIS.3 ILE.1 LEU.6 ARG.4 VAL.4 GLU.7 TYR.3
2bskA TOT.65 # CYS.4 GLN.4 HIS.2 SER.2 VAL.2 LYS.5 PRO.1 THR.8 PHE.5 ASN.2 GLY.2 ILE.2 LEU.5 ARG.3 ASP.2 ALA.4 GLU.7 TYR.3 MET.2
3jtmA TOT.337 # CYS.4 ASP.20 SER.9 GLN.11 LYS.18 PRO.18 THR.18 PHE.9 ASN.16 HIS.9 GLY.31 ILE.21 LEU.33 ARG.15 TRP.4 ALA.30 VAL.26 GLU.21 TYR.14 MET.10
4ndhA TOT.180 # PRO.9 CYS.3 GLN.10 HIS.14 SER.15 VAL.15 LYS.16 TRP.5 THR.4 PHE.5 ASN.3 GLY.8 ILE.8 LEU.20 ARG.8 ASP.7 ALA.7 GLU.11 TYR.5 MET.7
1xp8A TOT.298 # CYS.1 GLN.13 ASP.15 SER.17 VAL.25 LYS.22 PRO.9 THR.15 PHE.7 ALA.39 HIS.1 GLY.28 ILE.23 GLU.20 LEU.28 ARG.16 ASN.5 TYR.7 MET.7
3igsA TOT.225 # CYS.5 HIS.6 VAL.17 GLN.6 LYS.6 ASN.4 PRO.13 THR.11 PHE.1 ALA.37 GLY.17 ILE.19 LEU.23 ARG.13 TRP.2 ASP.17 GLU.11 TYR.4 SER.13
3i6vA TOT.218 # CYS.2 GLN.3 ASP.20 SER.11 VAL.16 LYS.6 ASN.8 PRO.8 THR.16 PHE.8 ALA.24 GLY.25 ILE.15 LEU.12 ARG.8 TRP.3 GLU.19 TYR.8 MET.6
4a9vA TOT.581 # CYS.7 ILE.25 ASN.38 GLN.24 LYS.28 PRO.36 GLY.66 THR.29 PHE.27 ALA.48 HIS.19 MET.12 ASP.40 LEU.30 ARG.34 TRP.10 VAL.32 GLU.27 TYR.13 SER.36
1lj5A TOT.379 # ASP.20 SER.26 GLN.21 GLY.20 ASN.13 PRO.21 LYS.19 THR.26 PHE.24 ALA.26 MET.16 HIS.13 ILE.15 LEU.37 ARG.18 TRP.4 VAL.33 GLU.18 TYR.9
2qxxA TOT.189 # CYS.2 GLN.8 HIS.5 SER.20 VAL.8 MET.3 TRP.1 PRO.14 LYS.4 THR.12 PHE.9 GLU.8 GLY.18 ILE.9 LEU.27 ARG.13 ASP.12 ALA.6 ASN.6 TYR.4
3f4lA TOT.340 # CYS.3 ASP.22 SER.18 GLN.10 LYS.26 ILE.18 PRO.18 THR.20 PHE.18 GLU.25 GLY.23 HIS.14 LEU.27 ARG.14 TRP.1 ALA.27 VAL.28 ASN.11 TYR.17
1floA TOT.404 # CYS.5 HIS.8 SER.39 GLN.15 LYS.35 ASN.22 PRO.15 ASP.14 THR.28 PHE.21 ALA.20 GLY.15 ILE.35 LEU.39 ARG.18 TRP.6 VAL.18 GLU.24 TYR.21 MET.6
3na6A TOT.315 # CYS.3 ILE.19 SER.17 GLN.11 LYS.9 ASN.9 PRO.20 HIS.8 PHE.14 ALA.32 GLY.32 ASP.26 LEU.27 ARG.17 TRP.2 THR.18 VAL.25 GLU.17 TYR.9
4gdnA TOT.334 # MET.6 ILE.22 VAL.17 GLN.18 LYS.29 THR.25 PRO.14 HIS.14 PHE.11 ASN.31 GLY.18 ASP.17 LEU.32 ARG.4 TRP.4 ALA.15 GLU.17 TYR.14 SER.26
3r5lA TOT.114 # CYS.1 ILE.5 GLN.7 VAL.10 LYS.8 ASN.4 PRO.9 THR.10 PHE.2 ALA.8 GLY.9 ASP.6 LEU.10 ARG.7 TRP.3 GLU.6 TYR.6 SER.3
3sokA TOT.151 # CYS.2 GLN.3 ILE.13 SER.7 VAL.9 LYS.15 PRO.3 THR.7 PHE.4 ALA.17 HIS.1 GLY.16 ASP.12 GLU.9 LEU.14 ARG.2 ASN.9 TYR.7 MET.1
1yw5A TOT.177 # CYS.1 ASP.8 SER.21 GLN.7 VAL.9 LYS.13 PRO.9 THR.9 PHE.6 GLU.13 HIS.6 GLY.13 ILE.10 LEU.14 ARG.9 TRP.3 ALA.6 ASN.14 TYR.4 MET.2
2vvpA TOT.157 # CYS.3 MET.2 ASP.9 GLN.7 VAL.9 LYS.4 ASN.4 PRO.8 THR.8 PHE.2 ALA.25 HIS.7 GLY.16 ILE.11 LEU.11 ARG.11 TRP.2 GLU.9 TYR.5 SER.4
2i5hA TOT.169 # ILE.16 SER.4 VAL.12 GLN.6 LYS.18 ASN.3 PRO.11 THR.7 PHE.6 ALA.7 HIS.4 GLY.8 ASP.11 LEU.13 ARG.14 TRP.1 GLU.13 TYR.10 MET.5
2qkiB TOT.184 # CYS.2 MET.3 HIS.4 VAL.22 GLN.7 LYS.13 TRP.3 PRO.11 THR.9 PHE.7 GLU.16 GLY.5 ILE.14 LEU.16 ARG.9 ASP.8 ALA.8 ASN.8 TYR.5 SER.14
2qkiC TOT.292 # CYS.13 ILE.17 SER.15 GLN.14 LYS.24 PRO.10 GLY.13 THR.15 PHE.12 ASN.11 HIS.5 MET.7 ASP.25 LEU.24 ARG.11 TRP.4 ALA.13 VAL.17 GLU.28 TYR.14
1j6uA TOT.422 # GLN.5 ILE.24 SER.26 VAL.38 LYS.27 ASN.21 PRO.15 THR.24 PHE.24 ALA.28 HIS.15 GLY.28 ASP.24 LEU.37 ARG.25 TRP.2 GLU.41 TYR.18
2pa4A TOT.294 # CYS.2 GLN.7 ILE.19 SER.9 VAL.30 MET.5 ASN.2 PRO.17 LYS.17 THR.15 PHE.6 ALA.36 HIS.8 GLY.25 ASP.23 LEU.31 ARG.14 GLU.24 TYR.4
4u5aA TOT.163 # CYS.1 GLN.4 ILE.27 SER.15 VAL.7 LYS.15 PRO.2 THR.5 PHE.8 ALA.4 GLY.4 HIS.2 GLU.10 LEU.21 ARG.1 ASP.12 ASN.19 TYR.6
1sdiA TOT.213 # CYS.2 GLN.16 ILE.10 SER.17 VAL.14 GLY.17 THR.12 PRO.6 LYS.5 HIS.6 PHE.3 GLU.7 MET.5 ASP.7 LEU.35 ARG.13 TRP.1 ALA.24 ASN.9 TYR.4
3ftbA TOT.334 # CYS.7 GLN.1 ILE.45 SER.21 VAL.16 LYS.34 PRO.10 THR.6 PHE.20 GLU.27 HIS.3 GLY.19 ASP.18 LEU.30 ARG.12 TRP.2 ALA.16 ASN.31 TYR.12 MET.4
2pttB TOT.108 # CYS.2 GLN.6 HIS.2 SER.13 VAL.8 LYS.9 TRP.3 THR.4 PHE.4 GLU.5 GLY.9 ILE.7 LEU.9 ARG.2 ASP.8 PRO.4 ASN.7 TYR.4 ALA.2
2pttA TOT.103 # ILE.8 SER.5 GLN.1 LYS.9 PRO.4 ASP.4 THR.9 PHE.3 ASN.9 GLY.6 HIS.3 LEU.9 ARG.6 TRP.1 ALA.2 VAL.6 GLU.10 TYR.7 MET.1
1b0xA TOT.72 # ILE.5 SER.5 GLN.7 MET.5 LYS.3 THR.6 PHE.2 ALA.8 HIS.3 GLY.4 ASP.5 GLU.1 LEU.4 ARG.3 TRP.1 VAL.6 ASN.2 TYR.2
4tr6A TOT.348 # CYS.1 GLN.13 ASP.22 SER.29 VAL.31 MET.4 ASN.14 PRO.18 LYS.18 THR.24 PHE.14 ALA.22 HIS.4 GLY.15 ILE.38 LEU.38 ARG.10 TRP.1 GLU.26 TYR.6
2giyA TOT.176 # CYS.7 ILE.8 GLN.6 VAL.15 MET.4 PRO.14 ASP.8 THR.11 PHE.4 ALA.20 GLY.8 HIS.8 GLU.11 LEU.11 ARG.9 TRP.4 ASN.5 TYR.7 SER.16
4mh1A TOT.484 # CYS.5 ASP.29 SER.27 GLN.22 MET.13 ILE.26 PRO.24 LYS.4 THR.43 PHE.14 ALA.40 GLY.54 HIS.7 GLU.23 LEU.30 ARG.21 TRP.14 VAL.40 ASN.29 TYR.19
4ee6A TOT.275 # CYS.3 THR.18 GLN.3 ASP.18 SER.23 VAL.24 LYS.8 ASN.6 PRO.18 HIS.5 PHE.14 ALA.23 GLY.23 ILE.15 LEU.25 ARG.11 TRP.5 GLU.17 TYR.12 MET.4
3ihsA TOT.81 # GLN.5 ILE.7 SER.6 VAL.6 LYS.5 PRO.1 THR.5 PHE.3 ALA.13 HIS.1 GLY.6 ASP.3 GLU.6 LEU.6 ARG.3 ASN.4 TYR.1
2pneA TOT.81 # CYS.4 ASP.3 SER.3 VAL.4 LYS.3 PRO.6 THR.3 ALA.11 GLY.37 HIS.2 ARG.1 ASN.4
4iedA TOT.241 # ASP.16 SER.14 VAL.14 GLN.7 LYS.26 THR.6 PRO.6 HIS.1 PHE.15 ALA.9 GLY.14 ILE.21 GLU.20 LEU.23 ARG.8 TRP.5 ASN.20 TYR.12 MET.4
3ml4A TOT.191 # CYS.8 GLN.4 ASP.8 SER.13 VAL.14 LYS.6 ILE.9 PRO.11 THR.9 PHE.9 ALA.16 GLY.18 HIS.5 ASN.2 LEU.25 ARG.12 TRP.5 GLU.12 TYR.5
2qrvA TOT.258 # CYS.5 ASP.16 VAL.24 GLN.6 MET.8 ASN.8 PRO.14 LYS.9 THR.7 PHE.16 ALA.15 HIS.8 GLY.19 ILE.13 LEU.25 ARG.21 TRP.5 GLU.16 TYR.7 SER.16
1lvoA TOT.299 # CYS.6 GLN.7 ILE.13 SER.31 VAL.30 MET.10 PRO.8 LYS.12 THR.16 PHE.13 GLU.19 HIS.6 GLY.31 ASP.7 LEU.25 ARG.11 TRP.3 ALA.13 ASN.24 TYR.14
2ewcA TOT.116 # CYS.2 HIS.4 SER.3 GLN.6 LYS.4 PRO.3 ASP.9 THR.4 PHE.6 ALA.7 GLY.12 ILE.6 GLU.8 LEU.9 ARG.9 TRP.1 VAL.11 ASN.6 TYR.6
1rktA TOT.201 # GLN.10 ASP.13 SER.13 VAL.13 LYS.17 PRO.4 THR.11 PHE.12 ASN.4 HIS.2 GLY.11 ILE.8 LEU.22 ARG.13 TRP.2 ALA.15 GLU.23 TYR.8
3dupA TOT.279 # CYS.3 ASP.22 GLN.8 VAL.27 LYS.9 ILE.10 PRO.17 THR.12 PHE.11 ALA.31 GLY.21 HIS.7 GLU.15 LEU.31 ARG.24 TRP.4 ASN.10 TYR.6 SER.11
4nu7A TOT.225 # ARG.8 CYS.2 HIS.5 GLN.7 VAL.16 GLY.20 PRO.11 LYS.14 THR.7 PHE.13 ALA.30 MET.10 ILE.12 GLU.9 LEU.21 TRP.3 ASP.17 ASN.6 SER.14
2vwrA TOT.94 # GLN.5 ASP.6 SER.5 VAL.5 MET.1 PRO.4 LYS.3 THR.3 PHE.1 ALA.8 HIS.2 GLY.10 ILE.8 GLU.8 LEU.14 ARG.7 ASN.3 TYR.1
1uiiA TOT.61 # PRO.1 HIS.2 VAL.3 GLN.3 LYS.10 ASN.4 TRP.1 ALA.7 MET.1 ILE.2 LEU.5 ARG.3 ASP.1 GLU.13 TYR.3 SER.2
4rd7A TOT.107 # CYS.1 GLN.4 HIS.4 SER.5 VAL.11 ILE.3 PRO.9 THR.4 PHE.4 ALA.13 GLY.8 ASP.7 ASN.5 LEU.7 ARG.9 TRP.5 GLU.5 TYR.3
3q3qA TOT.526 # CYS.6 GLN.26 ASP.36 SER.35 VAL.33 LYS.26 ASN.10 PRO.36 THR.33 PHE.17 ALA.60 HIS.10 GLY.45 ILE.24 LEU.42 ARG.29 TRP.7 GLU.24 TYR.15 MET.12
3wryA TOT.412 # CYS.10 GLN.8 ASP.21 SER.37 VAL.44 MET.9 ASN.17 PRO.15 LYS.23 THR.29 PHE.23 ALA.31 HIS.6 GLY.34 ILE.22 LEU.36 ARG.14 TRP.1 GLU.27 TYR.5
3hn2A TOT.302 # CYS.3 GLN.8 ILE.21 SER.6 VAL.17 LYS.7 PRO.12 THR.13 PHE.12 ALA.32 HIS.4 GLY.34 ASP.14 GLU.28 LEU.39 ARG.24 TRP.2 ASN.10 TYR.8 MET.8
3bedA TOT.121 # CYS.1 ASP.5 SER.6 GLN.5 LYS.3 ASN.4 PRO.6 THR.11 ALA.21 HIS.1 GLY.10 ILE.7 LEU.17 ARG.2 VAL.11 GLU.9 TYR.2
2f2cA TOT.235 # CYS.8 MET.3 ILE.18 VAL.12 GLN.7 LYS.17 PRO.10 THR.24 PHE.7 ASN.10 HIS.1 GLY.6 ASP.12 LEU.41 ARG.7 TRP.5 ALA.13 GLU.14 TYR.5 SER.15
3qhyB TOT.271 # GLN.10 HIS.3 SER.21 VAL.24 LYS.12 ILE.11 PRO.8 THR.16 PHE.3 ALA.46 GLY.42 ASP.16 GLU.10 LEU.16 ARG.3 TRP.10 ASN.11 TYR.8 MET.1
3qhyA TOT.258 # GLN.6 ILE.19 SER.11 VAL.14 LYS.20 ASN.16 PRO.9 THR.23 PHE.8 ALA.32 HIS.4 GLY.19 ASP.16 LEU.17 ARG.13 TRP.3 GLU.15 TYR.9 MET.4
3b49A TOT.195 # CYS.1 ASP.14 VAL.16 GLN.5 LYS.22 ASN.3 PRO.12 THR.9 PHE.11 ALA.10 GLY.11 HIS.5 ILE.8 LEU.13 ARG.12 TRP.5 GLU.23 TYR.6 SER.9
2q97T TOT.109 # MET.1 HIS.1 GLN.14 VAL.3 LYS.9 ASN.4 PRO.3 THR.6 PHE.1 ALA.14 GLY.3 ASP.3 ILE.3 LEU.20 ARG.8 GLU.12 TYR.2 SER.2
1su0B TOT.136 # CYS.3 GLN.6 ILE.8 SER.9 VAL.9 LYS.10 PRO.4 THR.6 PHE.4 GLU.11 HIS.5 GLY.9 ASP.8 LEU.12 ARG.3 TRP.1 ALA.17 ASN.6 TYR.1 MET.4
3vteA TOT.502 # CYS.4 GLN.12 ILE.38 SER.33 VAL.36 LYS.41 THR.27 PRO.24 HIS.18 PHE.24 ALA.25 GLY.38 ASP.23 GLU.25 LEU.37 ARG.16 TRP.10 ASN.34 TYR.25 MET.12
3grdA TOT.126 # GLN.2 ILE.7 SER.13 VAL.12 LYS.9 TRP.3 PRO.2 THR.4 PHE.5 ASN.6 GLY.11 HIS.4 LEU.6 ARG.3 ASP.4 ALA.11 GLU.16 TYR.8
2qtdA TOT.94 # CYS.2 ILE.15 SER.11 VAL.8 LYS.10 PRO.1 THR.1 PHE.5 GLU.8 HIS.1 GLY.3 ASP.9 LEU.3 ARG.1 ALA.3 ASN.10 TYR.3
2x6wA TOT.596 # CYS.14 GLN.26 HIS.12 SER.62 VAL.58 MET.10 ILE.34 PRO.19 LYS.6 THR.33 PHE.30 ALA.48 GLY.60 ASP.26 GLU.15 LEU.30 ARG.23 TRP.7 ASN.51 TYR.32
3ocmA TOT.146 # CYS.1 GLN.3 ILE.13 SER.8 VAL.15 LYS.2 ASN.3 PRO.7 THR.8 PHE.6 ALA.12 HIS.2 GLY.11 ASP.13 LEU.14 ARG.15 TRP.1 GLU.12
3zx4A TOT.250 # CYS.1 HIS.2 SER.3 VAL.23 LYS.7 ILE.3 PRO.20 THR.9 PHE.6 ALA.34 GLY.27 ASP.12 ASN.2 LEU.33 ARG.29 TRP.4 GLU.25 TYR.9 MET.1
1azwA TOT.313 # CYS.3 MET.4 HIS.17 VAL.22 GLN.13 LYS.7 ILE.10 PRO.16 THR.15 PHE.18 ALA.31 GLY.24 ASP.24 GLU.18 LEU.29 ARG.23 TRP.9 ASN.7 TYR.9 SER.14
1v6sA TOT.390 # GLN.3 HIS.6 SER.15 VAL.38 LYS.15 ASN.5 PRO.27 THR.11 PHE.16 ALA.46 GLY.44 ASP.18 ILE.9 LEU.54 ARG.33 TRP.1 GLU.37 TYR.7 MET.5
3b8xA TOT.386 # CYS.5 GLN.11 ILE.29 SER.25 VAL.25 LYS.31 ASN.26 PRO.11 THR.23 PHE.24 ALA.18 HIS.6 GLY.26 ASP.25 LEU.35 ARG.12 TRP.4 GLU.25 TYR.17 MET.8
4rku4 TOT.168 # GLN.7 HIS.4 SER.9 VAL.10 MET.3 ILE.10 PRO.15 LYS.3 THR.6 PHE.12 ALA.13 GLY.21 ASP.7 GLU.7 LEU.18 ARG.4 TRP.5 ASN.10 TYR.4
4rku3 TOT.140 # GLN.3 ILE.5 SER.3 VAL.9 LYS.4 ASN.7 PRO.10 THR.3 PHE.9 ALA.13 HIS.2 GLY.24 ASP.6 LEU.16 ARG.4 TRP.3 GLU.6 TYR.8 MET.5
4rku2 TOT.134 # THR.7 GLN.3 ASP.9 SER.5 VAL.6 MET.3 ASN.4 PRO.13 LYS.2 HIS.3 PHE.9 ALA.12 GLY.14 ILE.8 LEU.14 ARG.7 TRP.7 GLU.7 TYR.1
4rku1 TOT.153 # CYS.2 GLN.4 ILE.8 SER.7 VAL.9 LYS.7 ASN.5 PRO.16 THR.1 PHE.8 ALA.14 HIS.5 GLY.16 ASP.7 LEU.19 ARG.6 TRP.3 GLU.10 TYR.4 MET.2
1bteA TOT.86 # CYS.10 ILE.5 SER.4 GLN.3 LYS.5 PRO.3 ASP.5 THR.4 PHE.6 ALA.2 GLY.5 HIS.1 GLU.10 LEU.1 ARG.3 TRP.3 VAL.3 ASN.7 TYR.4 MET.2
4rkuG TOT.83 # GLN.3 ILE.4 SER.7 VAL.7 LYS.3 PRO.2 THR.4 PHE.6 ALA.10 HIS.2 GLY.8 ASP.3 GLU.4 LEU.10 ARG.3 TRP.1 ASN.3 TYR.3
4rkuF TOT.151 # CYS.2 ILE.15 SER.10 GLN.5 LYS.14 PRO.7 THR.5 PHE.6 GLU.9 HIS.2 GLY.12 ASP.7 LEU.16 ARG.8 TRP.4 ALA.15 VAL.6 ASN.3 TYR.5
4rkuD TOT.134 # CYS.1 ILE.7 SER.7 GLN.7 LYS.11 PRO.13 THR.7 PHE.6 ASN.5 HIS.1 GLY.15 ASP.2 LEU.10 ARG.8 TRP.1 ALA.5 VAL.9 GLU.11 TYR.6 MET.2
1gzsB TOT.165 # CYS.3 GLN.11 ILE.16 SER.12 VAL.5 LYS.12 ASN.14 PRO.11 GLY.8 THR.10 PHE.8 ALA.17 HIS.1 MET.4 ASP.6 LEU.12 ARG.3 GLU.7 TYR.5
3ngmA TOT.297 # CYS.8 GLN.8 ILE.14 SER.25 VAL.21 LYS.14 PRO.11 THR.24 PHE.12 ALA.34 HIS.7 GLY.32 ASP.16 GLU.10 LEU.17 ARG.10 TRP.3 ASN.18 TYR.11 MET.2
4rkuN TOT.85 # CYS.4 GLN.3 ASP.5 SER.5 VAL.4 LYS.13 PRO.2 THR.4 PHE.8 GLU.7 GLY.5 ILE.1 LEU.6 ARG.2 TRP.2 ALA.7 ASN.5 TYR.2
4rkuL TOT.160 # CYS.1 GLN.5 ILE.9 ASN.5 VAL.12 LYS.5 PRO.13 ASP.4 THR.11 PHE.11 ALA.14 GLY.20 HIS.1 LEU.20 ARG.4 TRP.3 GLU.4 TYR.6 SER.12
4rkuK TOT.65 # CYS.1 ILE.4 SER.4 VAL.4 LYS.2 PRO.2 THR.7 PHE.4 ALA.10 HIS.1 GLY.9 ASP.3 GLU.1 LEU.7 ARG.2 ASN.2 MET.2
4rkuJ TOT.40 # ILE.2 SER.2 VAL.2 LYS.1 ASN.1 PRO.3 THR.3 PHE.4 ALA.6 GLY.1 ASP.2 LEU.8 ARG.2 TRP.1 GLU.1 TYR.1
4rkuH TOT.81 # ILE.4 SER.7 GLN.3 LYS.5 ASN.1 PRO.8 THR.7 PHE.7 ALA.5 GLY.9 ASP.5 LEU.11 ARG.1 TRP.1 VAL.1 GLU.2 TYR.4
4m70A TOT.107 # CYS.2 ILE.6 GLN.5 VAL.8 LYS.3 ASN.2 PRO.1 GLY.2 THR.8 PHE.4 ALA.10 HIS.1 MET.6 ASP.5 LEU.12 ARG.5 TRP.2 GLU.13 TYR.3 SER.9
3kfoA TOT.196 # CYS.2 GLN.5 ASP.12 SER.16 VAL.16 LYS.10 PRO.6 THR.10 PHE.8 ASN.18 HIS.2 GLY.6 ILE.17 LEU.28 ARG.8 TRP.1 ALA.5 GLU.19 TYR.7
4m70B TOT.91 # CYS.1 HIS.1 SER.8 GLN.2 LYS.9 ILE.7 PRO.5 GLY.2 THR.5 PHE.2 ALA.9 MET.2 ASP.3 GLU.11 LEU.8 ARG.5 TRP.1 VAL.2 ASN.5 TYR.3
1k1eA TOT.177 # CYS.2 GLN.8 ASP.17 SER.11 VAL.14 MET.6 PRO.3 LYS.13 THR.8 PHE.10 ALA.19 HIS.4 GLY.17 ILE.11 GLU.6 LEU.16 ARG.6 ASN.3 TYR.3
2v6vA TOT.126 # CYS.2 GLN.4 ASP.10 SER.8 VAL.12 LYS.6 THR.3 PRO.6 HIS.1 PHE.7 ALA.6 GLY.8 ILE.5 GLU.8 LEU.16 ARG.8 TRP.2 ASN.6 TYR.8
1nslA TOT.171 # CYS.4 GLN.3 ASP.8 SER.6 VAL.7 LYS.10 ASN.8 PRO.3 THR.6 PHE.6 ALA.15 HIS.4 GLY.14 ILE.15 LEU.20 ARG.13 TRP.4 GLU.17 TYR.8
3pa8A TOT.243 # CYS.2 ILE.32 SER.28 GLN.7 LYS.23 ASN.14 PRO.8 THR.6 PHE.9 ALA.10 HIS.3 GLY.11 ASP.18 LEU.18 ARG.6 TRP.1 VAL.10 GLU.22 TYR.13 MET.2
1ashA TOT.146 # CYS.3 ILE.4 SER.3 GLN.5 LYS.14 PRO.6 THR.10 PHE.8 ASN.6 HIS.7 GLY.4 ASP.11 LEU.12 ARG.9 TRP.3 ALA.10 VAL.5 GLU.16 TYR.7 MET.3
1y07A TOT.121 # CYS.3 GLN.3 ASP.5 SER.6 VAL.17 LYS.8 ASN.1 PRO.7 THR.5 PHE.6 ALA.12 GLY.10 HIS.6 ILE.3 LEU.10 ARG.3 TRP.2 GLU.10 TYR.2 MET.2
3pvhA TOT.153 # GLN.3 ASP.11 SER.11 VAL.13 LYS.13 ASN.8 PRO.8 THR.8 PHE.4 ALA.14 GLY.11 ILE.9 LEU.15 ARG.5 TRP.1 GLU.13 TYR.6
4kn5A TOT.230 # GLN.12 HIS.4 SER.15 VAL.22 LYS.9 ILE.16 PRO.4 THR.13 PHE.13 ASN.9 GLY.18 ASP.18 LEU.14 ARG.7 ALA.35 GLU.13 TYR.8
1wy7A TOT.195 # CYS.1 THR.6 ASP.9 SER.11 GLN.2 LYS.20 ASN.5 PRO.7 HIS.5 PHE.12 ALA.13 GLY.14 ILE.15 LEU.20 ARG.11 TRP.3 VAL.20 GLU.16 TYR.5
3dtzA TOT.203 # GLN.2 ILE.19 SER.22 VAL.9 LYS.8 TRP.4 PRO.10 THR.9 PHE.10 ALA.14 GLY.8 HIS.3 GLU.13 LEU.19 ARG.18 ASP.16 ASN.4 TYR.15
1pjhA TOT.259 # CYS.6 GLN.3 ASP.11 SER.19 VAL.15 LYS.21 ASN.21 PRO.10 THR.9 PHE.17 ALA.16 HIS.3 GLY.16 ILE.19 LEU.28 ARG.9 TRP.2 GLU.17 TYR.13 MET.4
1rz3A TOT.180 # CYS.3 ASP.15 SER.8 GLN.9 LYS.10 ILE.11 PRO.4 THR.12 PHE.11 ASN.4 GLY.7 HIS.7 LEU.19 ARG.13 TRP.5 ALA.7 VAL.11 GLU.14 TYR.10
3b2nA TOT.120 # GLN.3 ILE.13 ASN.9 VAL.12 LYS.9 PRO.3 GLY.5 THR.6 PHE.3 ALA.7 HIS.2 MET.5 ASP.8 LEU.14 ARG.4 GLU.12 TYR.3 SER.2
4imiA TOT.332 # CYS.9 ILE.21 SER.26 GLN.18 LYS.22 ASN.17 PRO.8 THR.16 PHE.11 ALA.26 HIS.5 GLY.13 ASP.18 LEU.40 ARG.15 TRP.2 VAL.28 GLU.24 TYR.2 MET.11
2iu1A TOT.178 # CYS.2 THR.2 GLN.4 ILE.14 SER.10 VAL.14 LYS.22 ASN.5 PRO.3 HIS.5 PHE.6 ALA.11 GLY.5 ASP.8 LEU.17 ARG.9 TRP.2 GLU.31 TYR.5 MET.3
1dmuA TOT.290 # CYS.1 GLN.13 ASP.22 SER.19 VAL.16 LYS.16 PRO.21 THR.13 PHE.11 ASN.17 HIS.3 GLY.22 ILE.23 LEU.31 ARG.15 TRP.3 ALA.9 GLU.12 TYR.14 MET.9
3u9wA TOT.608 # CYS.11 ILE.31 VAL.38 GLN.26 LYS.40 ASN.21 PRO.34 GLY.30 THR.40 PHE.27 ALA.38 MET.10 HIS.16 LEU.69 ARG.23 TRP.13 ASP.34 GLU.40 TYR.22 SER.45
2jenA TOT.232 # GLN.6 ILE.14 SER.28 VAL.15 LYS.13 PRO.6 THR.19 PHE.8 ALA.17 HIS.4 GLY.21 ASP.12 GLU.4 LEU.7 ARG.4 TRP.15 ASN.23 TYR.14 MET.2
3eurA TOT.139 # CYS.2 GLN.3 HIS.2 ASN.10 VAL.6 LYS.17 TRP.2 PRO.5 THR.10 PHE.5 ALA.12 GLY.7 ILE.6 LEU.20 ARG.3 ASP.8 GLU.10 TYR.8 SER.3
4dqaA TOT.328 # ILE.20 GLN.7 VAL.28 LYS.14 PRO.12 THR.25 PHE.16 ASN.20 HIS.4 GLY.34 ASP.19 LEU.23 ARG.10 TRP.5 ALA.19 GLU.17 TYR.21 SER.34
4tqlA TOT.229 # ILE.19 VAL.9 GLN.19 LYS.60 ASN.2 GLY.3 PHE.1 ALA.15 MET.17 ASP.9 LEU.25 ARG.6 GLU.41 TYR.3
3d3zA TOT.238 # CYS.10 GLN.9 ASP.25 SER.27 VAL.6 LYS.8 ILE.11 PRO.12 THR.16 PHE.7 GLU.20 GLY.16 HIS.4 LEU.15 ARG.3 TRP.6 ALA.13 ASN.9 TYR.20 MET.1
3fimB TOT.565 # CYS.2 GLN.20 ASP.39 SER.50 VAL.45 LYS.11 PRO.41 THR.37 PHE.28 ALA.49 HIS.10 GLY.46 ILE.30 GLU.20 LEU.44 ARG.25 TRP.10 ASN.38 TYR.11 MET.9
1gkpA TOT.457 # CYS.6 GLN.12 ASP.28 SER.19 VAL.31 LYS.28 PRO.22 THR.32 PHE.23 ALA.41 HIS.11 GLY.43 ILE.26 GLU.33 LEU.34 ARG.23 TRP.4 ASN.12 TYR.20 MET.9
2wnfA TOT.269 # CYS.6 HIS.11 VAL.21 GLN.8 LYS.17 ILE.17 PRO.13 THR.17 PHE.14 ALA.12 GLY.16 ASP.14 GLU.19 LEU.21 ARG.17 TRP.7 ASN.12 TYR.10 SER.17
4axiA TOT.116 # GLN.3 ASP.7 SER.13 VAL.12 LYS.8 ASN.6 PRO.3 THR.8 PHE.3 ALA.9 HIS.1 GLY.7 ILE.12 LEU.11 ARG.3 GLU.7 TYR.2 MET.1
4ohcA TOT.212 # CYS.2 GLN.5 ASP.13 SER.12 VAL.18 LYS.8 ASN.6 PRO.7 THR.14 PHE.12 ALA.24 HIS.7 GLY.14 ILE.14 LEU.16 ARG.12 TRP.5 GLU.12 TYR.6 MET.5
4eqmA TOT.260 # CYS.2 GLN.9 ILE.31 SER.17 VAL.19 GLY.13 ASN.14 PRO.10 LYS.14 THR.14 PHE.7 ALA.14 MET.6 HIS.8 LEU.18 ARG.9 ASP.21 GLU.23 TYR.11
3bb7A TOT.314 # CYS.2 ILE.12 SER.16 GLN.8 LYS.17 PRO.14 GLY.31 THR.26 PHE.11 ALA.30 HIS.6 MET.8 ASP.20 GLU.14 LEU.21 ARG.6 TRP.7 VAL.23 ASN.21 TYR.21
2fcfA TOT.83 # GLN.3 ILE.7 SER.7 VAL.9 GLY.9 ASN.2 PRO.5 LYS.4 THR.2 PHE.2 ALA.5 HIS.2 MET.3 ASP.5 LEU.6 ARG.7 TRP.1 GLU.4
3dkrA TOT.233 # GLN.11 HIS.9 SER.11 VAL.17 LYS.6 ASN.8 PRO.12 THR.13 PHE.13 ALA.29 GLY.21 ILE.11 LEU.23 ARG.6 TRP.3 ASP.13 GLU.11 TYR.10 MET.6
4bjqA TOT.78 # ASP.6 SER.3 GLN.2 LYS.7 PRO.5 HIS.2 PHE.1 ALA.10 GLY.5 ILE.7 GLU.3 LEU.8 ARG.5 TRP.2 VAL.4 ASN.5 TYR.2 MET.1
1dgwX TOT.76 # CYS.1 ASP.4 SER.4 GLN.2 LYS.3 THR.2 PRO.4 GLY.4 HIS.1 PHE.2 GLU.7 MET.1 ILE.4 LEU.11 ARG.5 ALA.4 VAL.5 ASN.8 TYR.4
4iz7B TOT.82 # CYS.1 GLN.1 ASP.7 SER.8 VAL.3 LYS.3 ILE.6 PRO.2 THR.7 PHE.3 ASN.4 GLY.3 HIS.2 LEU.11 ARG.3 TRP.1 ALA.3 GLU.9 TYR.3 MET.2
3n0xA TOT.344 # ILE.24 GLN.12 VAL.21 LYS.23 PRO.18 THR.29 PHE.12 ALA.49 HIS.3 GLY.29 ASP.25 GLU.20 LEU.27 ARG.11 TRP.5 ASN.10 TYR.14 SER.12
1dgwA TOT.178 # CYS.1 MET.1 ASP.12 GLN.9 VAL.8 LYS.10 PRO.10 THR.9 PHE.11 GLU.12 HIS.3 GLY.7 ILE.8 LEU.28 ARG.10 ALA.6 ASN.13 TYR.8 SER.12
3knbB TOT.90 # CYS.3 GLN.1 HIS.1 SER.4 VAL.12 LYS.1 ASN.1 PRO.9 THR.3 PHE.3 ALA.17 GLY.9 ASP.2 LEU.10 ARG.5 TRP.1 GLU.6 TYR.2
3knbA TOT.97 # CYS.2 HIS.3 SER.8 GLN.4 LYS.3 ASN.3 PRO.6 ASP.7 THR.9 PHE.3 ALA.4 GLY.10 ILE.10 LEU.7 ARG.3 TRP.1 VAL.5 GLU.7 TYR.1 MET.1
4fuqA TOT.488 # CYS.1 ASP.39 GLN.6 VAL.43 LYS.29 ASN.14 PRO.25 THR.36 PHE.19 ALA.52 HIS.12 GLY.47 ILE.25 LEU.47 ARG.28 TRP.3 GLU.25 TYR.16 SER.21
1zxmA TOT.361 # CYS.6 ASP.24 SER.21 GLN.17 MET.12 PRO.11 LYS.30 THR.22 PHE.17 GLU.21 HIS.7 GLY.22 ILE.24 LEU.25 ARG.13 TRP.5 ALA.16 VAL.33 ASN.21 TYR.14
4h62K TOT.18 # ASP.3 SER.1 GLN.2 LYS.1 PRO.1 THR.1 ALA.1 ILE.1 LEU.4 GLU.3
1im5A TOT.179 # CYS.3 MET.3 GLN.3 ILE.13 ASN.4 VAL.16 LYS.14 TRP.2 PRO.12 THR.6 PHE.7 ALA.15 GLY.15 HIS.4 LEU.11 ARG.12 ASP.11 GLU.19 TYR.5 SER.4
4wfeF TOT.211 # CYS.4 GLN.9 HIS.3 GLY.12 SER.37 VAL.10 LYS.13 ASN.9 PRO.11 ASP.9 THR.20 PHE.6 ALA.15 MET.5 ILE.8 LEU.10 ARG.6 TRP.5 GLU.9 TYR.10
4wfeA TOT.251 # CYS.4 GLN.7 ILE.15 SER.12 VAL.22 LYS.4 ASN.2 PRO.10 THR.14 PHE.17 ALA.23 HIS.5 GLY.24 ASP.10 LEU.42 ARG.12 TRP.6 GLU.12 TYR.8 MET.2
4q7zA TOT.225 # CYS.9 GLN.4 ASP.10 SER.17 VAL.22 MET.4 ASN.4 PRO.14 LYS.3 THR.14 PHE.9 ALA.18 GLY.24 HIS.13 ILE.5 LEU.22 ARG.19 TRP.6 GLU.5 TYR.3
3frwA TOT.91 # CYS.3 ILE.5 VAL.5 GLN.1 LYS.7 ASN.5 THR.9 PHE.5 ALA.4 HIS.1 GLY.3 ASP.5 LEU.9 ARG.6 GLU.12 TYR.4 SER.7
2q8xA TOT.323 # CYS.4 HIS.15 SER.15 GLN.13 LYS.15 PRO.14 GLY.15 THR.12 PHE.21 ASN.11 MET.8 ILE.21 LEU.25 ARG.22 ASP.25 TRP.9 ALA.25 VAL.23 GLU.21 TYR.9
1o4tA TOT.114 # CYS.1 HIS.6 SER.9 VAL.8 LYS.6 ILE.8 PRO.4 GLY.12 THR.4 PHE.5 ALA.6 MET.5 ASP.5 GLU.12 LEU.11 ARG.5 ASN.5 TYR.2
1rjbA TOT.298 # CYS.8 ASP.13 SER.21 GLN.10 LYS.18 PRO.10 THR.10 PHE.20 ASN.13 HIS.3 GLY.21 ILE.16 LEU.31 ARG.12 TRP.5 ALA.16 VAL.21 GLU.21 TYR.18 MET.11
1wzuA TOT.271 # CYS.3 GLN.4 ILE.21 SER.7 VAL.28 LYS.26 PRO.13 GLY.6 THR.10 PHE.8 ASN.9 HIS.5 MET.9 ASP.18 LEU.21 ARG.15 TRP.2 ALA.30 GLU.26 TYR.10
3pg6A TOT.132 # ILE.8 SER.9 GLN.5 LYS.11 PRO.9 THR.8 PHE.5 ALA.4 HIS.3 GLY.14 ASP.6 GLU.9 LEU.9 ARG.6 TRP.1 VAL.9 ASN.4 TYR.9 MET.3
4b6iA TOT.100 # CYS.2 GLN.7 ASP.4 SER.13 VAL.1 LYS.7 ASN.6 PRO.1 THR.6 PHE.3 ALA.10 HIS.1 GLY.4 ILE.2 LEU.11 ARG.4 TRP.1 GLU.10 TYR.5 MET.2
3d8cA TOT.321 # CYS.3 ASP.13 SER.14 GLN.18 LYS.12 ASN.22 PRO.24 GLY.27 HIS.8 PHE.17 ALA.14 MET.8 ILE.15 LEU.29 ARG.15 TRP.8 THR.13 VAL.19 GLU.24 TYR.18
3bkwA TOT.212 # CYS.3 GLN.3 ILE.8 SER.9 VAL.13 LYS.3 ASN.1 PRO.13 THR.11 PHE.9 ALA.26 HIS.10 GLY.19 ASP.14 LEU.25 ARG.18 TRP.6 GLU.15 TYR.6
1ryiA TOT.364 # CYS.4 GLN.8 HIS.13 SER.20 VAL.25 LYS.24 ASN.11 PRO.14 THR.13 PHE.18 ALA.34 GLY.35 ASP.23 ILE.18 LEU.32 ARG.16 TRP.7 GLU.24 TYR.12 MET.13
2zeqA TOT.78 # CYS.1 MET.2 ASP.4 GLN.7 VAL.11 LYS.3 PRO.4 THR.2 PHE.4 ALA.3 HIS.2 GLY.4 ILE.5 GLU.4 LEU.6 ARG.7 ASN.3 TYR.1 SER.5
1z8oA TOT.402 # CYS.2 GLN.10 ASP.34 SER.20 VAL.36 LYS.9 ASN.6 PRO.26 THR.21 PHE.17 ALA.34 HIS.8 GLY.28 ILE.17 LEU.48 ARG.37 TRP.4 GLU.31 TYR.10 MET.4
1jd5A TOT.105 # CYS.3 GLN.6 ASP.5 SER.3 VAL.5 LYS.6 ASN.4 PRO.6 THR.4 PHE.6 ALA.9 HIS.2 GLY.8 ILE.2 LEU.9 ARG.6 TRP.4 GLU.10 TYR.5 MET.2
2gufA TOT.551 # GLN.30 ILE.24 SER.42 VAL.37 LYS.19 ASN.25 PRO.16 THR.49 PHE.17 ALA.33 HIS.11 GLY.55 ASP.46 LEU.41 ARG.31 TRP.13 GLU.17 TYR.43 MET.2
1e29A TOT.135 # CYS.2 MET.1 HIS.2 VAL.6 GLN.4 LYS.6 ILE.7 PRO.7 THR.15 PHE.5 ALA.8 GLY.10 ASP.12 GLU.10 LEU.13 ARG.7 TRP.1 ASN.8 TYR.6 SER.5
4p0tA TOT.146 # CYS.5 GLN.6 HIS.8 SER.12 VAL.14 LYS.6 ASN.3 PRO.5 GLY.7 THR.8 PHE.5 ALA.13 MET.2 ILE.5 LEU.25 ARG.7 ASP.5 GLU.7 TYR.3
3fbtA TOT.267 # CYS.3 GLN.2 ILE.27 SER.21 VAL.25 LYS.29 PRO.7 THR.9 PHE.12 ASN.14 HIS.3 GLY.21 ASP.11 LEU.20 ARG.4 TRP.1 ALA.13 GLU.27 TYR.14 MET.4
3h5jA TOT.168 # GLN.4 ASP.14 SER.12 VAL.14 LYS.4 ASN.4 PRO.7 THR.8 PHE.11 ALA.16 HIS.4 GLY.16 ILE.10 LEU.18 ARG.12 TRP.4 GLU.8 TYR.1 MET.1
3gneA TOT.243 # GLN.7 ASP.15 SER.16 VAL.16 LYS.23 PRO.12 THR.12 PHE.17 ALA.12 HIS.4 GLY.31 ILE.14 GLU.7 LEU.13 ARG.7 TRP.6 ASN.18 TYR.9 MET.4
2f41A TOT.83 # GLN.3 ILE.10 SER.6 VAL.14 LYS.1 ASN.3 THR.4 PHE.5 ALA.12 GLY.6 HIS.3 LEU.5 ARG.3 ASP.3 GLU.3 TYR.1 MET.1
1outB TOT.146 # CYS.1 ASP.6 VAL.17 GLN.3 LYS.11 PRO.6 GLY.10 THR.9 PHE.8 ALA.19 HIS.2 MET.4 ILE.9 GLU.5 LEU.9 ARG.4 TRP.4 ASN.7 TYR.4 SER.8
4hz9A TOT.118 # CYS.1 ASP.4 SER.10 GLN.3 LYS.7 ILE.9 PRO.9 THR.2 PHE.3 ALA.15 GLY.13 HIS.7 ASN.3 LEU.4 ARG.6 TRP.2 VAL.4 GLU.4 TYR.10 MET.2
4hz9B TOT.123 # GLN.7 ASP.14 SER.7 VAL.13 MET.1 ILE.7 PRO.7 LYS.4 THR.6 PHE.5 ALA.10 GLY.5 HIS.4 GLU.4 LEU.8 ARG.7 TRP.4 ASN.3 TYR.7
2id6A TOT.174 # PRO.2 ILE.7 GLN.4 VAL.13 LYS.13 TRP.2 THR.8 PHE.15 GLU.19 GLY.9 HIS.3 LEU.24 ARG.10 ASP.13 ALA.12 ASN.5 TYR.8 SER.7
4m5bA TOT.212 # CYS.1 GLN.3 ILE.16 SER.9 VAL.16 MET.10 PRO.12 LYS.7 THR.14 PHE.12 ALA.33 GLY.21 HIS.5 GLU.4 LEU.28 TRP.1 ASP.3 ARG.1 ASN.8 TYR.8
4la9A TOT.226 # ASP.17 SER.17 GLN.10 LYS.23 PRO.6 THR.15 PHE.9 GLU.9 HIS.1 GLY.21 ILE.14 LEU.13 ARG.1 TRP.3 ALA.24 VAL.11 ASN.11 TYR.12 MET.9
3hvzA TOT.63 # HIS.1 SER.3 VAL.9 LYS.5 PRO.3 THR.5 PHE.3 ALA.4 GLY.6 ILE.9 GLU.3 LEU.2 ARG.2 ASP.5 ASN.1 TYR.2
3huhA TOT.124 # CYS.1 GLN.6 ILE.17 SER.10 VAL.8 MET.2 ASN.4 PRO.6 LYS.4 THR.9 PHE.6 ALA.7 HIS.2 GLY.8 ASP.7 LEU.8 ARG.6 GLU.10 TYR.3
3dqqA TOT.419 # CYS.8 GLN.28 ILE.19 SER.32 VAL.34 LYS.8 ASN.10 PRO.19 THR.26 PHE.14 ALA.53 HIS.9 GLY.37 ASP.16 LEU.39 ARG.21 TRP.4 GLU.21 TYR.11 MET.10
1dqvA TOT.274 # CYS.4 GLN.8 ASP.18 SER.16 VAL.21 LYS.19 ILE.13 PRO.17 THR.10 PHE.12 ALA.19 GLY.16 HIS.8 ASN.12 LEU.34 ARG.16 TRP.3 GLU.17 TYR.9 MET.2
3u1jA TOT.20 # ASP.2 VAL.2 GLN.1 LYS.1 THR.3 ALA.3 GLY.1 LEU.1 TRP.1 GLU.5
3tvjB TOT.242 # CYS.5 HIS.6 SER.14 GLN.7 GLY.26 ILE.18 PRO.10 LYS.11 THR.14 PHE.8 ALA.22 MET.5 ASP.15 GLU.11 LEU.18 ARG.9 TRP.7 VAL.14 ASN.11 TYR.11
4r85A TOT.411 # CYS.8 MET.10 ASP.31 GLN.21 VAL.24 LYS.9 ASN.13 PRO.16 THR.20 PHE.12 ALA.42 HIS.13 GLY.30 ILE.29 LEU.42 ARG.36 TRP.4 GLU.23 TYR.10 SER.18
4py9A TOT.329 # CYS.8 GLN.5 ILE.31 SER.28 VAL.18 LYS.25 THR.12 PRO.10 HIS.8 PHE.21 ALA.17 GLY.22 ASP.25 GLU.24 LEU.28 ARG.14 TRP.2 ASN.14 TYR.17
3tvjA TOT.83 # CYS.5 GLN.1 ILE.3 SER.6 VAL.8 LYS.5 ASN.1 PRO.6 THR.9 PHE.2 ALA.3 GLY.10 ASP.6 LEU.3 ARG.3 TRP.1 GLU.5 TYR.5 MET.1
4nzcA TOT.397 # GLN.17 ASP.29 SER.22 VAL.25 LYS.26 PRO.20 THR.17 PHE.14 ALA.45 HIS.7 GLY.32 ILE.16 GLU.14 LEU.42 ARG.14 TRP.8 ASN.21 TYR.23 MET.5
4tmkA TOT.208 # ILE.12 SER.6 VAL.18 GLN.9 LYS.9 ASN.3 PRO.5 THR.18 PHE.6 ALA.19 HIS.3 GLY.16 ASP.16 LEU.24 ARG.17 TRP.2 GLU.16 TYR.5 MET.4
2oqgA TOT.107 # CYS.1 ILE.6 SER.8 GLN.4 LYS.4 ASN.2 PRO.1 THR.7 PHE.1 ALA.18 HIS.1 GLY.7 ASP.3 LEU.13 ARG.11 TRP.2 VAL.6 GLU.10 TYR.2
3cljA TOT.146 # CYS.3 ILE.17 SER.17 GLN.4 LYS.12 ASN.6 PRO.2 GLY.7 HIS.4 THR.6 ALA.11 MET.2 ASP.12 LEU.17 ARG.7 TRP.1 VAL.2 GLU.6 TYR.5 PHE.5
4mrtC TOT.76 # GLN.4 ASP.1 SER.2 VAL.9 LYS.4 PRO.3 THR.3 PHE.3 ALA.12 HIS.2 GLY.5 ILE.5 GLU.5 LEU.8 ARG.3 TRP.1 ASN.2 TYR.3 MET.1
1jerA TOT.108 # CYS.3 MET.2 HIS.5 GLN.5 VAL.12 LYS.3 ILE.3 PRO.4 THR.7 PHE.7 ALA.7 GLY.7 ASP.6 GLU.5 LEU.4 ARG.3 TRP.2 ASN.10 TYR.2 SER.11
4il7A TOT.83 # ILE.13 SER.8 GLN.4 MET.2 PRO.3 LYS.1 THR.16 PHE.2 ALA.3 GLY.8 GLU.3 LEU.7 VAL.1 ASN.7 TYR.5
2imiA TOT.220 # CYS.2 GLN.6 HIS.6 SER.13 VAL.15 LYS.16 ILE.15 PRO.12 THR.13 PHE.10 ALA.14 GLY.13 ASP.14 ASN.7 LEU.26 ARG.8 TRP.1 GLU.16 TYR.9 MET.4
2jksA TOT.284 # CYS.12 ASP.13 SER.25 GLN.12 LYS.19 ASN.15 PRO.14 GLY.14 THR.37 PHE.8 ALA.24 MET.2 HIS.7 ILE.7 LEU.20 ARG.7 TRP.4 VAL.24 GLU.17 TYR.3
1jj2H TOT.156 # GLN.4 ASP.4 SER.6 VAL.12 LYS.11 THR.5 PRO.13 HIS.4 PHE.6 ALA.22 GLY.12 ILE.10 GLU.7 LEU.2 ARG.13 TRP.2 ASN.13 TYR.6 MET.4
3ovpA TOT.221 # CYS.4 GLN.8 ILE.11 SER.12 VAL.18 LYS.11 PRO.14 THR.7 PHE.8 GLU.13 HIS.7 GLY.20 ASP.14 LEU.18 ARG.8 TRP.3 ALA.18 ASN.10 TYR.3 MET.14
3cwwA TOT.953 # MET.22 GLN.42 ASP.43 ASN.46 VAL.45 LYS.70 ILE.56 PRO.52 THR.41 PHE.52 ALA.72 GLY.44 HIS.32 LEU.110 ARG.40 TRP.9 GLU.83 TYR.43 SER.51
4mbuA TOT.165 # CYS.1 MET.1 HIS.4 VAL.7 GLN.6 LYS.12 ILE.14 PRO.4 THR.10 PHE.10 ALA.19 GLY.9 ASP.8 GLU.10 LEU.13 ARG.7 TRP.3 ASN.9 TYR.10 SER.8
4fxkC TOT.290 # CYS.12 ASP.13 SER.19 GLN.15 LYS.11 PRO.12 THR.13 PHE.12 GLU.24 HIS.6 GLY.18 ILE.5 LEU.30 ARG.25 TRP.2 ALA.24 VAL.23 ASN.6 TYR.15 MET.5
4fxkA TOT.651 # CYS.5 ASP.33 SER.68 GLN.33 LYS.31 ASN.19 PRO.45 THR.27 PHE.29 ALA.41 HIS.16 GLY.53 ILE.27 LEU.72 ARG.34 TRP.4 VAL.56 GLU.28 TYR.19 MET.11
1qpoA TOT.284 # CYS.1 ASP.20 GLN.7 VAL.29 MET.4 ASN.7 PRO.10 LYS.6 THR.26 PHE.1 ALA.43 HIS.4 GLY.25 ILE.6 LEU.40 ARG.21 TRP.3 GLU.15 TYR.5 SER.11
2g5dA TOT.382 # CYS.2 MET.8 ILE.20 GLN.19 VAL.19 LYS.18 PRO.28 THR.24 PHE.18 ALA.36 HIS.9 GLY.45 ASP.17 GLU.13 LEU.28 ARG.27 TRP.5 ASN.11 TYR.20 SER.15
4liqE TOT.469 # CYS.10 HIS.15 SER.40 GLN.26 LYS.13 ILE.16 PRO.33 THR.31 PHE.19 ALA.30 GLY.29 ASP.17 GLU.24 LEU.46 ARG.20 TRP.10 VAL.45 ASN.24 TYR.16 MET.5
3m5qA TOT.357 # CYS.10 MET.7 HIS.8 GLN.18 VAL.23 LYS.8 ILE.15 PRO.30 THR.20 PHE.23 ALA.43 GLY.29 ASP.23 ASN.15 LEU.28 ARG.12 TRP.1 GLU.15 SER.29
3ajdA TOT.254 # CYS.4 GLN.5 ILE.29 SER.12 VAL.14 LYS.30 PRO.12 GLY.12 THR.11 PHE.12 GLU.21 HIS.1 MET.8 ASP.13 LEU.25 ARG.10 ALA.10 ASN.15 TYR.10
1s6cA TOT.161 # ILE.8 SER.6 GLN.9 LYS.11 PRO.3 GLY.8 THR.11 PHE.14 ALA.7 HIS.4 MET.7 ASP.13 GLU.12 LEU.14 ARG.5 TRP.1 VAL.11 ASN.10 TYR.7
3c19A TOT.177 # CYS.3 GLN.2 HIS.3 SER.6 VAL.29 LYS.8 ASN.1 PRO.7 ASP.16 THR.7 PHE.4 ALA.12 GLY.15 ILE.7 LEU.12 ARG.14 TRP.2 GLU.23 TYR.3 MET.3
2f2hA TOT.773 # CYS.13 MET.19 ASP.47 VAL.58 GLN.34 LYS.33 THR.42 PRO.38 HIS.21 PHE.44 ALA.48 GLY.65 ILE.23 GLU.47 LEU.65 ARG.41 TRP.25 ASN.41 TYR.32 SER.37
1hkqA TOT.125 # CYS.2 ILE.7 SER.7 GLN.3 LYS.11 ASN.3 PRO.4 THR.8 PHE.6 ALA.9 HIS.5 GLY.6 ASP.7 LEU.14 ARG.9 TRP.1 VAL.9 GLU.7 TYR.5 MET.2
1n8yC TOT.592 # CYS.47 ASP.29 SER.38 GLN.32 VAL.31 LYS.18 THR.28 PRO.40 HIS.23 PHE.15 ALA.33 GLY.46 ILE.22 GLU.37 LEU.64 ARG.35 TRP.7 ASN.23 TYR.17 MET.7
3ezyA TOT.334 # CYS.3 GLN.2 ASP.27 SER.18 VAL.31 MET.7 PRO.10 LYS.26 THR.13 PHE.14 ASN.10 HIS.6 GLY.25 ILE.23 LEU.30 ARG.24 ALA.23 GLU.31 TYR.11
2gtlN TOT.213 # CYS.10 GLN.3 HIS.12 SER.11 VAL.14 LYS.10 ASN.9 PRO.4 THR.16 PHE.9 ALA.16 GLY.11 ILE.12 LEU.19 ARG.16 TRP.2 ASP.18 GLU.19 TYR.2
2gtlO TOT.200 # CYS.9 MET.2 HIS.14 GLN.2 VAL.10 LYS.7 ILE.12 PRO.9 THR.10 PHE.12 ALA.9 GLY.13 ASP.22 ASN.4 LEU.13 ARG.12 GLU.24 TYR.2 SER.14
2gtlM TOT.204 # CYS.10 ASP.18 SER.12 GLN.6 LYS.6 ILE.10 PRO.6 THR.13 PHE.9 ASN.10 GLY.11 HIS.14 LEU.21 ARG.11 TRP.2 ALA.11 VAL.11 GLU.15 TYR.8
3bj91 TOT.116 # CYS.2 ASP.5 SER.13 GLN.8 GLY.9 ASN.2 PRO.9 LYS.2 THR.7 PHE.4 ALA.8 HIS.4 MET.3 ILE.3 LEU.10 ARG.9 TRP.1 VAL.7 GLU.3 TYR.7
2hm7A TOT.308 # CYS.1 GLN.12 ILE.10 SER.14 VAL.23 LYS.12 THR.8 PRO.27 HIS.8 PHE.12 ALA.37 GLY.21 ASP.21 GLU.20 LEU.35 ARG.16 TRP.4 ASN.6 TYR.16 MET.5
1jdpA TOT.396 # CYS.4 ASP.27 VAL.29 GLN.13 MET.12 ASN.9 PRO.13 LYS.17 THR.15 PHE.20 ALA.37 HIS.13 GLY.28 ILE.17 LEU.37 ARG.24 TRP.4 GLU.30 TYR.17 SER.30
1q1uA TOT.133 # CYS.1 ILE.7 SER.11 GLN.7 VAL.12 LYS.10 PRO.7 THR.7 PHE.8 ALA.4 HIS.2 GLY.12 ASP.5 GLU.5 LEU.11 ARG.5 TRP.1 ASN.6 TYR.9 MET.3
4lrlB TOT.445 # CYS.2 GLN.21 ASP.29 SER.27 VAL.30 LYS.19 THR.25 PRO.19 HIS.17 PHE.26 ALA.25 GLY.21 ILE.29 ASN.14 LEU.43 ARG.28 TRP.2 GLU.31 TYR.27 MET.10
2r8bA TOT.200 # CYS.1 GLN.6 ASP.10 SER.8 VAL.14 LYS.8 ASN.5 PRO.14 THR.10 PHE.12 ALA.22 HIS.7 GLY.23 ILE.11 LEU.18 ARG.12 TRP.1 GLU.14 TYR.4
2bpsA TOT.81 # CYS.2 GLN.2 HIS.4 SER.7 VAL.7 MET.1 ASN.3 PRO.3 LYS.6 ASP.8 THR.2 PHE.2 ALA.2 GLY.6 ILE.8 LEU.6 ARG.4 TRP.2 GLU.3 TYR.3
1ncqA TOT.273 # CYS.3 GLN.7 ASP.15 SER.23 VAL.21 MET.5 ASN.15 PRO.16 LYS.17 THR.22 PHE.10 ALA.21 GLY.13 HIS.10 ILE.14 LEU.15 ARG.13 TRP.4 GLU.14 TYR.15
3e8oA TOT.97 # CYS.1 HIS.9 VAL.5 GLN.4 LYS.2 ASN.3 PHE.1 PRO.2 THR.8 TRP.1 ALA.13 GLY.7 ILE.7 LEU.15 ARG.2 ASP.5 GLU.5 TYR.2 SER.5
4o2wA TOT.360 # CYS.10 GLN.23 ASP.17 SER.26 VAL.32 LYS.12 ASN.16 PRO.9 THR.20 PHE.10 ALA.32 GLY.54 HIS.12 ILE.13 LEU.31 ARG.13 TRP.5 GLU.13 TYR.8 MET.4
3f9iA TOT.210 # CYS.4 ILE.25 SER.18 GLN.5 LYS.15 PRO.4 THR.11 PHE.4 ALA.20 HIS.2 GLY.21 ASP.6 GLU.8 LEU.19 ARG.5 VAL.13 ASN.18 TYR.7 MET.5
4b3bA TOT.224 # ASP.11 SER.11 GLN.10 LYS.12 ILE.17 PRO.7 THR.13 PHE.7 ALA.20 GLY.19 HIS.8 ASN.8 LEU.27 ARG.15 TRP.1 VAL.13 GLU.17 TYR.4 MET.4
3u9jA TOT.151 # CYS.2 ASP.6 SER.8 GLN.10 LYS.16 ASN.10 PRO.4 THR.6 PHE.11 ALA.6 HIS.5 GLY.3 ILE.6 LEU.18 ARG.5 TRP.1 VAL.7 GLU.19 TYR.8
2xi9A TOT.299 # CYS.1 ILE.21 GLN.10 VAL.17 LYS.26 PRO.14 THR.26 PHE.13 ASN.14 HIS.4 GLY.18 ASP.24 LEU.23 ARG.8 TRP.1 ALA.18 GLU.23 TYR.20 SER.18
1np3A TOT.327 # CYS.6 GLN.8 ASP.16 SER.13 VAL.25 MET.11 PRO.11 LYS.19 THR.15 PHE.10 ALA.41 HIS.8 GLY.33 ILE.23 GLU.25 LEU.21 ARG.12 TRP.1 ASN.14 TYR.15
3rqzA TOT.237 # CYS.3 GLN.7 ILE.17 SER.13 VAL.22 PRO.17 HIS.10 THR.8 ASN.11 GLY.16 ASP.16 LEU.21 ARG.18 TRP.5 ALA.25 GLU.13 TYR.9 PHE.6
3uw0A TOT.294 # CYS.2 HIS.4 SER.24 GLN.9 LYS.7 PRO.19 ASP.21 THR.26 PHE.20 ALA.27 GLY.25 ILE.15 GLU.12 LEU.19 ARG.13 TRP.5 VAL.14 ASN.18 TYR.10 MET.4
3ckjA TOT.294 # CYS.2 HIS.4 SER.18 GLN.8 VAL.29 LYS.3 TRP.6 PRO.24 THR.16 PHE.6 GLU.15 GLY.29 ILE.15 LEU.37 ARG.22 ASP.21 ALA.28 ASN.4 TYR.4 MET.3
4rv2A TOT.129 # CYS.2 GLN.5 ASP.12 SER.1 ASN.3 VAL.10 LYS.6 PRO.4 THR.6 PHE.8 ALA.17 HIS.5 GLY.8 ILE.12 LEU.7 ARG.4 GLU.10 TYR.8 MET.1
3l8cA TOT.487 # CYS.2 ILE.37 SER.37 GLN.19 LYS.25 PRO.31 THR.30 PHE.25 GLU.30 HIS.8 GLY.26 ASP.33 LEU.48 ARG.14 TRP.3 ALA.44 VAL.27 ASN.12 TYR.21 MET.15
2zb6A TOT.417 # CYS.11 ASP.20 SER.37 VAL.37 GLN.14 LYS.19 ILE.19 PRO.26 THR.24 PHE.13 ALA.21 GLY.35 HIS.10 ASN.17 LEU.43 ARG.13 TRP.8 GLU.17 TYR.20 MET.13
3h8uA TOT.118 # HIS.8 GLN.4 VAL.15 LYS.2 ILE.8 PRO.8 THR.5 PHE.4 ALA.12 GLY.12 ASP.4 GLU.10 LEU.3 ARG.4 TRP.2 ASN.6 TYR.2 SER.9
2yjzA TOT.174 # CYS.4 HIS.3 SER.16 GLN.10 LYS.8 ILE.6 PRO.6 THR.5 PHE.6 ALA.16 GLY.14 ASP.9 GLU.8 LEU.19 ARG.8 TRP.1 VAL.18 ASN.8 TYR.6 MET.3
3mr0A TOT.127 # GLN.3 HIS.5 SER.8 VAL.7 LYS.5 ILE.5 PRO.5 THR.5 PHE.3 ALA.11 GLY.8 ASP.12 ASN.2 LEU.11 ARG.16 TRP.5 GLU.11 TYR.5
2vduB TOT.374 # CYS.7 ILE.38 SER.39 GLN.12 LYS.33 ASN.23 PRO.11 THR.14 PHE.25 ALA.17 HIS.11 GLY.13 ASP.30 LEU.33 ARG.8 TRP.5 VAL.22 GLU.19 TYR.12 MET.2
3dnhA TOT.230 # GLN.3 ASP.14 SER.10 VAL.12 LYS.8 ASN.5 PRO.15 THR.21 PHE.7 ALA.35 HIS.2 GLY.15 ILE.13 LEU.29 ARG.20 TRP.2 GLU.13 TYR.6
3wa8A TOT.179 # CYS.1 MET.3 ILE.9 GLN.13 VAL.11 LYS.6 ASN.2 PRO.5 THR.5 PHE.5 ALA.16 HIS.2 GLY.7 ASP.10 LEU.20 ARG.23 TRP.5 GLU.17 TYR.8 SER.11
2z0rA TOT.94 # HIS.5 GLN.2 VAL.10 LYS.2 ILE.1 PRO.3 THR.3 PHE.1 ALA.11 GLY.8 ASP.3 LEU.15 ARG.9 TRP.2 GLU.11 TYR.3 SER.5
3rf3A TOT.251 # CYS.2 ASP.13 GLN.12 VAL.26 LYS.16 ASN.10 PRO.10 GLY.10 THR.20 PHE.5 ALA.19 HIS.4 MET.10 ILE.19 LEU.24 ARG.11 TRP.2 GLU.21 TYR.4 SER.13
3wqoA TOT.271 # CYS.2 MET.5 GLN.1 ASP.16 ASN.20 VAL.23 LYS.17 THR.7 PRO.9 HIS.9 PHE.10 ALA.13 GLY.18 ILE.30 LEU.23 ARG.7 TRP.2 GLU.33 TYR.9 SER.17
3ejxA TOT.287 # CYS.8 GLN.7 ILE.13 SER.11 VAL.27 MET.8 ASN.14 PRO.14 LYS.15 THR.14 PHE.13 ALA.23 GLY.33 HIS.9 LEU.22 ARG.11 TRP.3 ASP.17 GLU.21 TYR.4
3tr9A TOT.270 # CYS.2 GLN.9 ASP.19 SER.22 VAL.20 LYS.15 ILE.21 PRO.16 THR.15 PHE.12 ALA.20 GLY.16 HIS.7 GLU.14 LEU.25 ARG.18 TRP.1 ASN.12 TYR.6
1eovA TOT.487 # CYS.3 HIS.12 SER.25 VAL.30 GLN.17 LYS.36 ASN.15 PRO.24 THR.24 PHE.28 ALA.33 GLY.30 ILE.26 LEU.50 ARG.32 TRP.1 ASP.30 GLU.43 TYR.18 MET.10
2zhnA TOT.145 # CYS.2 GLN.10 ILE.6 SER.15 VAL.14 LYS.3 TRP.1 PRO.8 THR.8 PHE.16 ALA.4 GLY.16 HIS.4 GLU.3 LEU.8 ARG.6 ASP.6 ASN.8 TYR.4 MET.3
1nrjA TOT.137 # CYS.1 GLN.14 ASP.5 SER.8 VAL.8 LYS.5 ASN.14 PRO.3 THR.9 PHE.12 ALA.6 HIS.2 GLY.5 ILE.8 LEU.18 ARG.2 TRP.1 GLU.9 TYR.6 MET.1
3ef6A TOT.400 # CYS.4 GLN.15 ILE.20 SER.23 VAL.36 LYS.4 ASN.4 PRO.16 THR.24 PHE.9 ALA.54 HIS.4 GLY.47 ASP.24 LEU.45 ARG.33 TRP.5 GLU.21 TYR.4 MET.8
3jxeA TOT.361 # CYS.5 ILE.27 SER.16 GLN.10 LYS.40 PRO.16 GLY.17 THR.21 PHE.34 ASN.7 HIS.6 MET.7 ASP.21 LEU.28 ARG.15 TRP.7 ALA.21 VAL.14 GLU.34 TYR.15
2zihA TOT.249 # CYS.3 GLN.6 ASP.16 SER.20 VAL.17 MET.9 PRO.6 LYS.6 THR.13 PHE.10 ASN.14 HIS.2 GLY.13 ILE.20 LEU.38 ARG.16 TRP.2 ALA.14 GLU.16 TYR.8
2g40A TOT.159 # CYS.2 HIS.6 SER.8 GLN.5 MET.1 TRP.2 PRO.10 LYS.1 THR.7 PHE.2 ALA.21 GLY.15 ILE.12 LEU.16 ARG.12 ASP.10 VAL.18 GLU.9 TYR.2
2gagD TOT.91 # CYS.3 GLN.2 ASP.4 SER.2 VAL.3 GLY.6 THR.2 PRO.7 LYS.6 HIS.3 PHE.5 GLU.6 MET.2 ILE.4 LEU.4 ARG.7 TRP.3 ALA.11 ASN.5 TYR.6
2gagB TOT.403 # CYS.3 GLN.12 ASP.18 SER.18 VAL.30 LYS.18 PRO.19 THR.22 PHE.15 GLU.28 HIS.20 GLY.41 ILE.25 LEU.32 ARG.14 TRP.9 ALA.43 ASN.18 TYR.10 MET.8
2gagC TOT.190 # CYS.2 GLN.6 ASP.8 SER.12 VAL.17 MET.3 ASN.4 PRO.12 LYS.2 THR.14 PHE.5 ALA.34 HIS.6 GLY.13 ILE.5 LEU.21 ARG.10 TRP.4 GLU.12
1k6kA TOT.141 # CYS.1 GLN.9 HIS.6 SER.12 VAL.13 MET.3 ASN.6 PRO.4 LYS.1 THR.6 PHE.7 ALA.15 GLY.3 ILE.3 LEU.20 ARG.11 ASP.3 GLU.17 TYR.1
3s4kA TOT.121 # CYS.1 ASP.7 SER.8 VAL.14 GLN.7 LYS.1 ASN.5 PRO.5 THR.7 PHE.4 ALA.10 GLY.13 HIS.2 ILE.4 LEU.12 ARG.9 TRP.2 GLU.5 TYR.2 MET.3
2j8mA TOT.171 # ASP.11 SER.9 GLN.10 GLY.19 THR.6 PRO.7 LYS.2 HIS.3 PHE.6 ALA.22 MET.3 ILE.9 GLU.7 LEU.16 ARG.14 TRP.4 VAL.12 ASN.6 TYR.5
3mizA TOT.272 # CYS.2 GLN.7 ILE.24 SER.18 VAL.17 LYS.7 ASN.11 PRO.13 THR.19 PHE.8 ALA.22 HIS.2 GLY.22 ASP.20 LEU.25 ARG.23 TRP.3 GLU.17 TYR.12
4itbA TOT.453 # CYS.5 ILE.28 SER.19 GLN.24 LYS.21 PRO.26 THR.27 PHE.24 ALA.68 HIS.5 GLY.33 ASP.17 GLU.34 LEU.43 ARG.19 TRP.5 VAL.26 ASN.12 TYR.9 MET.8
1uddA TOT.215 # CYS.1 MET.6 ASP.11 VAL.13 GLN.3 LYS.16 PRO.6 THR.10 PHE.10 ALA.14 HIS.3 GLY.11 ILE.15 GLU.19 LEU.28 ARG.13 TRP.5 ASN.7 TYR.13 SER.11
2ethA TOT.110 # ASP.5 SER.13 VAL.14 LYS.4 ASN.5 PRO.3 THR.7 PHE.11 ALA.5 HIS.1 GLY.5 ILE.4 LEU.14 ARG.5 GLU.10 TYR.4
1kjnA TOT.147 # CYS.2 GLN.2 ASP.10 SER.3 VAL.12 LYS.6 PRO.9 THR.8 PHE.6 ALA.20 HIS.3 GLY.7 ILE.11 GLU.15 LEU.16 ARG.7 ASN.6 TYR.4
4rhfA TOT.200 # CYS.5 GLN.11 ASP.10 SER.18 VAL.13 MET.9 ASN.4 PRO.9 LYS.9 THR.11 PHE.7 ALA.17 HIS.4 GLY.15 ILE.17 LEU.17 ARG.7 TRP.2 GLU.10 TYR.5
3tbnA TOT.87 # CYS.6 GLN.2 HIS.9 SER.5 VAL.4 LYS.8 ILE.1 PRO.8 THR.8 PHE.2 ALA.11 GLY.9 ASP.4 LEU.3 ARG.1 TRP.1 GLU.1 TYR.4
3hbaA TOT.297 # CYS.3 GLN.13 ILE.23 SER.22 VAL.28 LYS.12 PRO.12 THR.13 PHE.10 GLU.18 HIS.6 GLY.17 ASP.12 LEU.32 ARG.10 TRP.1 ALA.49 ASN.10 TYR.6
3ndqA TOT.97 # CYS.2 GLN.2 ASP.7 SER.6 VAL.3 LYS.6 ASN.7 PRO.4 GLY.4 THR.4 PHE.1 ALA.10 MET.4 ILE.7 LEU.8 ARG.10 GLU.9 TYR.3
2pvpA TOT.329 # CYS.4 GLN.6 ILE.26 SER.21 VAL.15 LYS.32 PRO.12 THR.5 PHE.26 GLU.29 GLY.17 HIS.7 LEU.44 ARG.6 ASP.16 ALA.21 ASN.23 TYR.16 MET.3
3ncoA TOT.310 # CYS.2 ASP.16 GLN.6 VAL.26 LYS.27 ASN.16 PRO.16 THR.11 PHE.20 ALA.17 HIS.8 GLY.17 ILE.24 LEU.18 ARG.12 TRP.13 GLU.28 TYR.17 SER.16
3h16A TOT.136 # MET.2 ASP.12 VAL.8 GLN.2 LYS.9 ASN.1 PRO.6 THR.5 PHE.9 ALA.13 HIS.5 GLY.7 ILE.9 LEU.12 ARG.8 TRP.4 GLU.8 TYR.1 SER.15
3d82A TOT.94 # CYS.1 HIS.4 GLN.6 VAL.9 LYS.7 ILE.9 PRO.4 THR.4 PHE.7 ALA.5 GLY.5 ASP.5 ASN.5 LEU.3 ARG.3 TRP.2 GLU.11 TYR.2 SER.2
3pzwA TOT.819 # CYS.4 GLN.26 ILE.53 SER.58 VAL.50 LYS.49 PRO.50 THR.46 PHE.29 ALA.54 HIS.24 GLY.51 ASP.44 GLU.55 LEU.86 ARG.37 TRP.14 ASN.38 TYR.37 MET.14
2v4vA TOT.129 # CYS.3 ASP.9 GLN.5 VAL.11 LYS.3 PRO.1 THR.13 PHE.7 ASN.7 HIS.1 GLY.19 ILE.5 LEU.5 ARG.3 TRP.2 ALA.7 GLU.8 TYR.7 SER.13
3psmA TOT.47 # CYS.8 ASP.6 SER.1 LYS.4 PRO.1 THR.4 PHE.3 GLU.2 HIS.2 GLY.3 ILE.1 LEU.2 ARG.5 TRP.1 ALA.1 ASN.3
3uafA TOT.117 # CYS.4 GLN.3 ILE.7 SER.6 VAL.7 LYS.4 THR.7 PRO.9 HIS.5 PHE.3 GLU.3 GLY.6 ASP.12 LEU.10 ARG.5 TRP.2 ALA.10 ASN.7 TYR.5 MET.2
2y78A TOT.122 # ASP.7 SER.7 GLN.4 LYS.5 ASN.2 PRO.6 THR.9 PHE.4 ALA.7 GLY.21 HIS.2 ILE.3 LEU.10 ARG.6 TRP.2 VAL.14 GLU.7 TYR.3 MET.3
4c89A TOT.334 # CYS.1 ILE.22 VAL.25 GLN.24 LYS.5 TRP.4 PRO.23 THR.25 PHE.15 ALA.42 GLY.18 HIS.9 GLU.10 LEU.33 ARG.9 ASP.20 ASN.22 TYR.12 SER.15
1j48A TOT.106 # CYS.4 ASP.5 VAL.9 GLN.3 LYS.1 PRO.6 THR.10 PHE.5 ALA.18 HIS.1 GLY.13 ILE.1 GLU.2 LEU.5 ARG.1 ASN.3 TYR.3 SER.16
2hljA TOT.147 # CYS.1 GLN.9 ASP.10 SER.7 VAL.10 LYS.2 ASN.4 PRO.4 THR.10 PHE.6 ALA.13 HIS.9 GLY.11 ILE.6 LEU.20 ARG.8 TRP.2 GLU.8 TYR.7
2arcA TOT.155 # CYS.1 ILE.11 SER.4 GLN.7 MET.2 PRO.12 LYS.1 THR.3 PHE.11 ALA.10 HIS.8 GLY.16 ASP.6 GLU.7 LEU.19 ARG.11 TRP.5 VAL.5 ASN.8 TYR.8
1is8A TOT.192 # CYS.2 ILE.12 GLN.9 VAL.16 LYS.9 ASN.6 PRO.8 GLY.10 THR.12 PHE.7 ALA.13 HIS.5 MET.9 ASP.10 LEU.19 ARG.14 TRP.1 GLU.15 TYR.4 SER.11
4e9lA TOT.314 # GLN.8 ASP.16 SER.30 VAL.29 LYS.14 PRO.16 THR.38 PHE.4 ALA.47 HIS.3 GLY.35 ILE.5 GLU.11 LEU.24 ARG.3 TRP.5 ASN.18 TYR.3 MET.5
3x0dA TOT.624 # CYS.8 MET.21 GLN.12 HIS.17 ASN.28 VAL.46 LYS.43 ILE.39 PRO.19 THR.32 PHE.36 ALA.39 GLY.42 ASP.47 LEU.49 ARG.27 TRP.12 GLU.48 TYR.15 SER.44
1au7A TOT.128 # CYS.3 ILE.6 SER.8 GLN.7 LYS.10 ASN.6 PRO.1 ASP.1 THR.6 PHE.7 ALA.12 GLY.5 HIS.3 LEU.11 ARG.13 TRP.2 VAL.7 GLU.16 TYR.1 MET.3
4ic9A TOT.130 # CYS.2 GLN.5 ASP.6 SER.8 VAL.9 MET.7 PRO.5 LYS.10 THR.6 PHE.4 ASN.5 GLY.15 ILE.6 LEU.8 ARG.9 TRP.2 ALA.12 GLU.10 TYR.1
3ff0A TOT.149 # CYS.3 ASP.12 GLN.5 VAL.10 LYS.6 ASN.8 PRO.9 THR.6 PHE.10 ALA.5 GLY.14 HIS.6 ILE.9 LEU.12 ARG.9 TRP.5 GLU.11 TYR.5 SER.4
4wokA TOT.316 # CYS.3 THR.18 ILE.16 SER.15 GLN.7 LYS.6 ASN.11 PRO.15 HIS.11 PHE.7 ALA.42 GLY.33 ASP.20 LEU.29 ARG.18 TRP.1 VAL.27 GLU.15 TYR.17 MET.5
4eh1A TOT.237 # CYS.2 GLN.16 ILE.11 SER.14 VAL.25 LYS.9 ASN.6 PRO.10 THR.8 PHE.8 ALA.19 GLY.22 HIS.6 LEU.19 ARG.12 TRP.2 ASP.13 GLU.16 TYR.15 MET.4
3ip0A TOT.158 # ASP.8 VAL.8 GLN.7 MET.4 ILE.9 PRO.12 LYS.5 THR.9 PHE.6 ASN.8 GLY.8 HIS.4 LEU.22 ARG.10 TRP.3 ALA.13 GLU.12 TYR.4 SER.6
3lovA TOT.436 # CYS.3 ASP.26 GLN.20 VAL.27 LYS.13 ILE.30 PRO.26 THR.29 PHE.11 ALA.34 GLY.37 HIS.12 ASN.8 LEU.60 ARG.27 TRP.1 GLU.37 TYR.15 SER.20
2xryA TOT.446 # CYS.5 GLN.9 ILE.23 SER.34 VAL.26 LYS.29 ASN.18 PRO.26 ASP.23 THR.13 PHE.23 ALA.31 GLY.28 HIS.11 LEU.41 ARG.23 TRP.12 GLU.43 TYR.19 MET.9
3tqwA TOT.229 # ASP.13 SER.15 GLN.9 LYS.17 ASN.13 PRO.15 THR.12 PHE.4 ALA.30 HIS.4 GLY.13 ILE.16 LEU.27 ARG.8 VAL.16 GLU.9 TYR.8
1xjdA TOT.280 # CYS.5 ILE.17 SER.9 GLN.9 LYS.23 THR.8 PRO.9 HIS.11 PHE.25 ALA.11 GLY.17 ASP.20 GLU.23 LEU.33 ARG.12 TRP.5 VAL.13 ASN.11 TYR.8 MET.11
4ha7A TOT.221 # CYS.3 GLN.10 ASP.12 SER.14 VAL.18 LYS.14 ASN.12 PRO.13 HIS.5 PHE.7 ALA.8 GLY.15 ILE.19 LEU.21 ARG.9 TRP.5 THR.17 GLU.11 TYR.4 MET.4
3q2uA TOT.192 # CYS.11 GLN.7 HIS.6 SER.13 VAL.11 LYS.13 ASN.15 TRP.6 THR.10 PHE.9 ALA.14 GLY.10 ILE.11 LEU.9 ARG.7 ASP.13 PRO.12 GLU.5 TYR.8 MET.2
2cw9A TOT.176 # CYS.3 ASP.16 VAL.14 GLN.10 LYS.9 PRO.7 THR.7 PHE.6 ASN.6 HIS.2 GLY.8 ILE.13 LEU.23 ARG.9 TRP.3 ALA.15 GLU.12 TYR.4 SER.9
3kjhA TOT.254 # CYS.3 HIS.3 SER.10 GLN.4 LYS.27 ASN.10 PRO.7 THR.9 PHE.5 ALA.16 GLY.26 ILE.27 LEU.28 ARG.8 TRP.1 ASP.18 VAL.16 GLU.19 TYR.9 MET.8
4g1pA TOT.478 # CYS.5 GLN.16 HIS.9 SER.44 VAL.33 LYS.40 ASN.13 PRO.25 THR.25 PHE.23 ALA.29 GLY.38 ILE.29 LEU.44 ARG.11 TRP.5 ASP.35 GLU.27 TYR.15 MET.12
3kk7A TOT.483 # CYS.2 ASP.34 SER.42 GLN.16 LYS.40 ILE.38 PRO.21 THR.37 PHE.22 ASN.35 GLY.26 HIS.4 LEU.40 ARG.11 TRP.5 ALA.26 VAL.20 GLU.28 TYR.36
4nobA TOT.112 # CYS.4 GLN.5 ASP.5 SER.15 VAL.7 LYS.3 PRO.5 THR.9 PHE.4 GLU.7 HIS.1 GLY.11 ILE.7 LEU.8 ARG.4 TRP.1 ALA.2 ASN.7 TYR.6 MET.1
3ia7A TOT.394 # CYS.2 THR.16 GLN.12 ASP.19 SER.15 VAL.43 LYS.8 ASN.8 PRO.31 HIS.16 PHE.22 ALA.50 GLY.28 ILE.11 LEU.40 ARG.27 TRP.6 GLU.31 TYR.9
2qo4A TOT.125 # CYS.2 ILE.11 SER.7 GLN.5 LYS.15 PRO.3 THR.15 PHE.5 GLU.11 HIS.1 GLY.10 ASP.5 LEU.7 ARG.4 TRP.1 ALA.6 VAL.9 ASN.3 TYR.2 MET.3
2b8iA TOT.77 # MET.1 ASP.4 GLN.6 VAL.4 LYS.3 ILE.5 PRO.4 THR.2 PHE.1 ASN.5 GLY.3 HIS.2 LEU.12 ARG.2 ALA.9 GLU.6 TYR.4 SER.4
1ep5A TOT.152 # CYS.2 GLN.5 ASP.8 SER.6 VAL.16 LYS.12 ILE.5 PRO.7 GLY.17 THR.8 PHE.4 ASN.8 MET.5 HIS.4 LEU.9 ARG.6 TRP.3 ALA.10 GLU.9 TYR.8
2g8sA TOT.340 # HIS.6 SER.19 GLN.16 LYS.20 ILE.16 PRO.20 THR.14 PHE.13 ALA.21 GLY.42 ASP.28 GLU.15 LEU.33 ARG.18 TRP.11 VAL.23 ASN.15 TYR.10
1yvkA TOT.151 # CYS.3 ASP.14 SER.5 GLN.7 LYS.11 ASN.4 PRO.2 THR.6 PHE.5 ALA.9 HIS.3 GLY.11 ILE.12 LEU.22 ARG.7 TRP.1 VAL.8 GLU.14 TYR.7
1r1hA TOT.696 # CYS.12 GLN.31 ILE.45 SER.43 VAL.37 LYS.49 ASN.56 PRO.22 GLY.41 THR.31 PHE.28 ALA.50 HIS.9 MET.14 ASP.39 LEU.59 ARG.31 TRP.14 GLU.53 TYR.32
3kscB TOT.383 # CYS.5 ASP.18 SER.22 GLN.21 GLY.25 PRO.19 LYS.15 THR.15 PHE.20 ALA.31 HIS.7 MET.4 ILE.21 GLU.22 LEU.34 ARG.29 TRP.3 VAL.25 ASN.36 TYR.11
3wnoA TOT.700 # GLN.28 ILE.32 SER.68 VAL.39 LYS.22 PRO.18 THR.51 PHE.30 GLU.27 HIS.16 GLY.55 ASP.52 LEU.48 ARG.23 TRP.17 ALA.57 ASN.58 TYR.44 MET.15
3zfdA TOT.306 # CYS.7 ILE.22 SER.28 GLN.10 LYS.17 PRO.11 THR.20 PHE.12 GLU.15 GLY.24 HIS.7 LEU.31 ARG.16 ASP.13 ALA.19 VAL.24 ASN.18 TYR.9 MET.3
1qg8A TOT.238 # CYS.3 GLN.5 ILE.15 SER.18 VAL.16 LYS.14 PRO.11 GLY.6 THR.12 PHE.12 GLU.19 HIS.5 MET.7 ASP.16 LEU.17 ARG.16 TRP.3 ALA.14 ASN.14 TYR.15
2qeaA TOT.152 # CYS.1 ILE.7 SER.7 GLN.6 LYS.5 PRO.8 THR.12 PHE.9 ALA.17 HIS.3 GLY.19 ASP.18 LEU.13 ARG.4 TRP.4 VAL.7 GLU.10 TYR.2
2it2A TOT.182 # CYS.2 GLN.2 ILE.16 SER.14 VAL.13 LYS.18 PRO.3 THR.5 PHE.7 GLU.21 HIS.3 GLY.9 ASP.5 LEU.23 ARG.13 TRP.3 ALA.10 ASN.10 TYR.5
2qdeA TOT.375 # CYS.4 ASP.29 SER.11 GLN.10 VAL.26 LYS.21 PRO.19 THR.17 PHE.9 ALA.41 HIS.7 GLY.35 ILE.27 GLU.21 LEU.47 ARG.19 TRP.5 ASN.13 TYR.7 MET.7
4v0nB TOT.302 # CYS.7 ILE.23 GLN.7 VAL.31 LYS.13 ASN.14 PRO.19 GLY.22 THR.19 PHE.4 ALA.30 HIS.9 MET.6 ASP.11 LEU.30 ARG.12 TRP.5 GLU.13 TYR.12 SER.15
4kqdA TOT.114 # CYS.3 GLN.7 HIS.6 SER.6 VAL.6 GLY.2 PRO.2 LYS.2 ASP.7 THR.7 PHE.9 ASN.8 MET.1 ILE.9 LEU.12 ARG.6 TRP.3 ALA.6 GLU.9 TYR.3
1omzA TOT.250 # CYS.2 ILE.18 GLN.15 VAL.18 LYS.12 ASN.18 PRO.16 GLY.15 THR.11 PHE.15 ALA.13 HIS.8 MET.8 ASP.12 LEU.23 ARG.7 TRP.3 GLU.10 TYR.10 SER.16
3zzsA TOT.65 # ILE.6 VAL.7 GLN.2 LYS.5 ASN.1 THR.5 PHE.3 ALA.5 HIS.4 GLY.6 ASP.4 LEU.4 ARG.4 GLU.5 TYR.1 SER.3
3hnxA TOT.108 # CYS.2 HIS.4 VAL.5 GLN.5 MET.1 ILE.5 PRO.2 LYS.1 THR.6 PHE.5 GLU.7 GLY.10 ASP.9 LEU.8 ARG.11 TRP.2 ALA.8 ASN.12 TYR.1 SER.4
3bqzA TOT.178 # MET.2 HIS.3 GLN.6 VAL.7 LYS.19 ILE.17 PRO.1 THR.11 PHE.9 ASN.23 GLY.8 ASP.3 LEU.16 ARG.2 TRP.3 ALA.9 GLU.17 TYR.13 SER.9
3sy6A TOT.268 # CYS.3 ILE.13 SER.22 GLN.4 LYS.11 PRO.9 THR.27 PHE.12 ALA.26 HIS.4 GLY.28 ASP.14 GLU.7 LEU.20 ARG.9 TRP.1 VAL.21 ASN.19 TYR.18
4k6lF TOT.247 # CYS.1 GLN.11 ASP.14 SER.17 VAL.25 MET.4 PRO.14 LYS.2 THR.15 PHE.7 ALA.24 HIS.6 GLY.19 ILE.16 GLU.8 LEU.20 ARG.20 TRP.4 ASN.12 TYR.8
4k6lG TOT.224 # CYS.3 ILE.14 SER.28 GLN.11 LYS.5 PRO.10 GLY.15 THR.15 PHE.12 ALA.13 HIS.3 MET.4 ASP.11 GLU.6 LEU.17 ARG.15 VAL.14 ASN.11 TYR.17
1x19A TOT.350 # CYS.3 ASP.24 SER.20 GLN.9 LYS.22 ASN.15 PRO.18 THR.10 PHE.16 ALA.31 HIS.9 GLY.23 ILE.18 LEU.41 ARG.15 TRP.1 VAL.20 GLU.24 TYR.14 MET.17
4euoA TOT.313 # CYS.2 GLN.16 ILE.13 SER.22 VAL.23 LYS.25 ASN.9 PRO.12 GLY.22 THR.19 PHE.12 ALA.42 HIS.1 MET.7 ASP.27 LEU.20 ARG.6 TRP.12 GLU.13 TYR.10
1lf6A TOT.674 # CYS.2 ILE.50 SER.42 GLN.17 LYS.57 PRO.23 THR.36 PHE.16 ALA.55 HIS.9 GLY.53 ASP.54 GLU.41 LEU.47 ARG.18 TRP.14 VAL.35 ASN.47 TYR.45 MET.13
1g2fC TOT.89 # CYS.6 ILE.6 SER.4 GLN.6 LYS.6 PRO.4 HIS.7 PHE.5 THR.9 GLY.3 ASP.3 GLU.3 LEU.4 ARG.11 ALA.5 VAL.1 ASN.3 TYR.1 MET.2
1bvoA TOT.175 # CYS.6 HIS.6 SER.8 GLN.8 LYS.13 PRO.12 THR.12 PHE.8 GLU.15 GLY.15 ILE.9 LEU.9 ARG.12 ASP.5 ALA.7 VAL.18 ASN.6 TYR.5 MET.1
2c4jA TOT.217 # CYS.3 ASP.15 SER.14 GLN.9 LYS.18 PRO.12 THR.6 PHE.14 ASN.9 HIS.3 GLY.10 ILE.12 LEU.27 ARG.11 TRP.4 ALA.10 VAL.5 GLU.16 TYR.12 MET.7
3u81A TOT.218 # CYS.5 ASP.18 SER.12 VAL.15 GLN.13 LYS.13 PHE.4 PRO.11 HIS.2 THR.11 ALA.16 GLY.15 ILE.10 GLU.10 LEU.27 ARG.9 TRP.2 ASN.6 TYR.12 MET.7
3osnA TOT.376 # CYS.11 GLN.20 ASP.15 SER.31 VAL.37 LYS.28 PRO.16 GLY.18 THR.12 PHE.11 ASN.19 HIS.8 MET.10 ILE.20 LEU.48 ARG.19 ALA.16 GLU.29 TYR.8
4gbuA TOT.398 # ILE.21 SER.18 GLN.13 MET.6 TRP.7 PRO.20 LYS.25 THR.16 PHE.18 ASN.22 GLY.34 HIS.10 LEU.30 ARG.21 ASP.22 ALA.38 VAL.27 GLU.31 TYR.19
4jwtA TOT.235 # CYS.1 GLN.5 ILE.19 SER.22 VAL.18 LYS.16 ASN.7 PRO.6 THR.11 PHE.14 ALA.26 HIS.3 GLY.22 ASP.13 LEU.19 ARG.2 TRP.1 GLU.21 TYR.9
4mfgA TOT.168 # CYS.2 MET.3 GLN.3 ASP.12 ASN.11 VAL.14 LYS.11 PRO.5 THR.9 PHE.2 ALA.8 HIS.3 GLY.17 ILE.21 LEU.9 ARG.4 TRP.2 GLU.13 TYR.7 SER.12
3hdvA TOT.117 # ASP.11 SER.5 GLN.2 LYS.6 ASN.3 PRO.3 THR.3 PHE.1 ALA.10 HIS.2 GLY.8 ILE.8 LEU.20 ARG.9 VAL.14 GLU.9 TYR.3
1kl7A TOT.488 # CYS.2 GLN.19 ILE.34 SER.39 VAL.30 LYS.38 ASN.29 PRO.18 THR.31 PHE.30 ALA.41 HIS.6 GLY.28 ASP.28 LEU.44 ARG.15 TRP.4 GLU.34 TYR.18
2d5kA TOT.148 # CYS.1 GLN.10 HIS.4 SER.11 VAL.13 LYS.9 ASN.11 PRO.2 THR.6 PHE.7 ALA.11 GLY.8 ASP.7 ILE.6 LEU.12 ARG.1 TRP.3 GLU.16 TYR.6 MET.4
3q62A TOT.170 # CYS.2 GLN.2 ILE.8 SER.4 VAL.15 MET.9 ASN.5 PRO.7 LYS.12 THR.6 PHE.8 ALA.10 HIS.2 GLY.26 ASP.13 LEU.17 ARG.6 TRP.3 GLU.10 TYR.5
1b5qB TOT.462 # CYS.2 ASP.33 SER.27 GLN.19 LYS.29 ILE.21 PRO.21 THR.21 PHE.20 ALA.30 GLY.35 HIS.8 GLU.29 LEU.32 ARG.25 TRP.8 VAL.43 ASN.18 TYR.29 MET.12
1gu2A TOT.124 # CYS.4 ILE.8 SER.6 VAL.6 LYS.14 ASN.11 PRO.9 THR.12 PHE.6 ALA.12 HIS.3 GLY.5 ASP.7 LEU.5 ARG.3 GLU.8 TYR.4 MET.1
2h5xA TOT.179 # ILE.5 VAL.22 GLN.2 MET.5 ASN.3 PRO.6 LYS.3 THR.13 PHE.3 ALA.31 GLY.16 HIS.3 LEU.24 ARG.14 ASP.7 GLU.11 TYR.2 SER.9
3lnpA TOT.429 # CYS.9 GLN.22 ILE.35 SER.27 VAL.22 LYS.16 PRO.23 THR.29 PHE.14 ALA.49 HIS.17 GLY.26 ASP.28 GLU.25 LEU.43 ARG.11 TRP.6 ASN.21 TYR.6
4gx8A TOT.305 # CYS.6 GLN.6 ILE.17 SER.16 VAL.20 MET.6 ASN.11 PRO.12 LYS.10 THR.13 PHE.12 ALA.33 HIS.9 GLY.26 ASP.20 LEU.33 ARG.20 TRP.2 GLU.23 TYR.10
4esqA TOT.194 # CYS.4 MET.4 ASP.10 VAL.21 GLN.11 LYS.11 PRO.10 THR.16 PHE.3 ALA.22 HIS.2 GLY.14 ILE.8 GLU.9 LEU.7 ARG.4 TRP.4 ASN.12 TYR.6 SER.16
3qbrA TOT.163 # CYS.2 MET.2 ASP.13 GLN.9 VAL.6 LYS.8 PRO.3 THR.10 PHE.9 GLU.8 HIS.6 GLY.9 ILE.13 LEU.25 ARG.5 TRP.3 ALA.7 ASN.9 TYR.3 SER.13
2wxwA TOT.435 # CYS.4 GLN.24 ASP.25 SER.29 VAL.37 LYS.19 PRO.22 THR.27 PHE.22 GLU.19 HIS.14 GLY.25 ILE.13 LEU.63 ARG.13 TRP.6 ALA.41 ASN.14 TYR.8 MET.10
1qdlB TOT.195 # CYS.1 GLN.3 ILE.27 SER.12 VAL.15 LYS.10 PRO.10 THR.5 PHE.6 ALA.10 HIS.7 GLY.16 ASP.11 GLU.12 LEU.16 ARG.11 ASN.9 TYR.12 MET.2
1qdlA TOT.415 # CYS.3 GLN.4 ILE.33 SER.27 VAL.29 LYS.29 PRO.20 ASP.23 THR.12 PHE.21 GLU.34 GLY.29 HIS.8 LEU.37 ARG.19 TRP.3 ALA.30 ASN.19 TYR.27 MET.8
4lvnP TOT.81 # GLN.1 HIS.1 SER.10 VAL.3 LYS.7 PRO.2 THR.4 PHE.3 ALA.3 GLY.2 ILE.8 GLU.10 LEU.13 ARG.1 ASP.6 ASN.5 TYR.1 MET.1
3iftA TOT.131 # ILE.6 GLN.4 VAL.15 LYS.1 PRO.5 THR.12 PHE.2 ALA.12 HIS.2 GLY.11 ASP.14 GLU.7 LEU.13 ARG.4 TRP.2 ASN.2 TYR.5 SER.14
3vprA TOT.184 # GLN.4 HIS.5 SER.8 VAL.11 LYS.9 ILE.8 PRO.5 THR.7 PHE.8 ASN.4 GLY.12 ASP.7 LEU.25 ARG.19 TRP.2 ALA.23 GLU.21 TYR.6
4lvnA TOT.336 # CYS.7 GLN.6 ASP.26 SER.34 VAL.19 LYS.23 THR.8 PRO.11 HIS.12 PHE.12 ASN.37 GLY.20 ILE.31 LEU.28 ARG.9 TRP.2 ALA.20 GLU.9 TYR.16 MET.6
4lvnB TOT.194 # CYS.4 GLN.7 ASP.7 SER.41 VAL.10 LYS.4 ASN.7 PRO.10 GLY.13 THR.19 PHE.8 ALA.13 HIS.5 MET.4 ILE.6 LEU.13 ARG.6 TRP.4 GLU.4 TYR.9
2r48A TOT.104 # CYS.1 ILE.12 GLN.4 VAL.7 LYS.9 PRO.3 THR.4 PHE.1 GLU.9 HIS.1 GLY.9 ASP.6 LEU.9 ARG.5 ALA.12 ASN.6 TYR.2 SER.4
3f5oA TOT.136 # CYS.2 GLN.3 HIS.5 ASN.5 VAL.11 LYS.10 PRO.3 GLY.12 THR.17 PHE.2 ALA.13 MET.6 ILE.9 LEU.14 ARG.4 ASP.4 GLU.8 TYR.1 SER.7
2ae6A TOT.144 # CYS.1 ASP.8 ASN.2 GLN.11 LYS.7 PRO.4 THR.5 PHE.8 ALA.15 HIS.7 GLY.9 ILE.14 LEU.13 ARG.3 TRP.2 VAL.6 GLU.10 TYR.8 SER.11
1i6lA TOT.316 # CYS.3 GLN.18 ASP.16 SER.16 VAL.19 LYS.21 ILE.27 PRO.14 THR.17 PHE.8 ALA.28 GLY.20 HIS.7 ASN.9 LEU.29 ARG.18 TRP.3 GLU.29 TYR.14
3p7jA TOT.59 # GLN.2 ASP.3 SER.4 VAL.4 LYS.3 ASN.3 PRO.2 THR.2 PHE.4 ALA.4 HIS.1 GLY.5 ILE.4 LEU.5 ARG.4 GLU.6 TYR.1 MET.2
3zgyA TOT.276 # CYS.1 GLN.7 HIS.9 SER.13 VAL.19 MET.4 ILE.11 PRO.13 THR.19 PHE.8 ALA.54 GLY.37 ASP.19 GLU.6 LEU.32 ARG.9 TRP.4 ASN.4 TYR.7
2wq4A TOT.131 # CYS.1 GLN.3 ILE.9 SER.15 VAL.15 LYS.5 PRO.9 THR.11 PHE.5 ALA.14 HIS.1 GLY.13 ASP.6 GLU.2 LEU.8 ARG.2 TRP.2 ASN.4 TYR.6
4i6mD TOT.53 # ASP.6 SER.2 GLN.3 LYS.7 PRO.3 THR.3 PHE.2 ASN.2 ILE.2 LEU.4 ARG.5 TRP.3 ALA.1 GLU.6 TYR.4
4i6mC TOT.68 # ILE.2 SER.2 GLN.4 LYS.14 THR.3 PHE.1 ALA.7 HIS.2 GLY.1 ASP.2 GLU.6 LEU.8 ARG.9 VAL.1 ASN.5 TYR.1
4i6mB TOT.393 # CYS.4 ASP.24 GLN.23 VAL.17 LYS.28 ILE.46 PRO.18 THR.24 PHE.19 ASN.22 GLY.17 HIS.8 LEU.37 ARG.10 TRP.6 ALA.17 GLU.29 TYR.13 SER.31
4i6mA TOT.388 # CYS.4 ILE.28 SER.27 GLN.21 LYS.31 ASN.17 PRO.19 THR.21 PHE.18 ALA.25 HIS.3 GLY.20 ASP.20 LEU.41 ARG.14 TRP.7 VAL.25 GLU.29 TYR.18
1bev1 TOT.268 # CYS.3 ASP.14 SER.29 GLN.12 LYS.5 PRO.16 THR.29 PHE.17 ALA.25 HIS.7 GLY.15 ILE.12 GLU.9 LEU.11 ARG.17 TRP.4 VAL.16 ASN.7 TYR.12 MET.8
1bev3 TOT.242 # CYS.3 ILE.19 VAL.15 GLN.13 LYS.5 ASN.10 PRO.18 GLY.21 THR.19 PHE.10 ALA.15 HIS.4 MET.9 ASP.11 LEU.20 ARG.8 TRP.4 GLU.13 TYR.9 SER.16
1bev4 TOT.35 # GLN.4 ILE.3 SER.4 VAL.1 LYS.2 PRO.2 THR.2 PHE.2 ALA.5 HIS.1 ASP.3 ASN.4 TYR.2
4eihA TOT.100 # CYS.1 GLN.1 HIS.7 SER.15 VAL.8 LYS.3 ILE.3 PRO.4 THR.7 PHE.2 ALA.7 GLY.6 ASP.2 ASN.2 LEU.11 ARG.6 TRP.1 GLU.7 TYR.7
2w37A TOT.341 # CYS.1 GLN.12 HIS.9 SER.18 VAL.20 LYS.26 ASN.16 PRO.10 THR.25 PHE.19 ALA.27 GLY.27 ILE.17 LEU.31 ARG.11 TRP.4 ASP.20 GLU.28 TYR.8 MET.12
1wxqA TOT.337 # CYS.2 GLN.8 ILE.25 SER.14 VAL.32 LYS.28 ASN.14 PRO.17 HIS.8 PHE.14 ALA.30 GLY.21 ASP.24 LEU.30 ARG.16 TRP.4 THR.14 GLU.25 TYR.11
2ps5A TOT.353 # CYS.7 HIS.13 SER.22 GLN.19 LYS.17 PRO.15 ASP.23 THR.15 PHE.20 ALA.22 GLY.12 ILE.12 GLU.28 LEU.31 ARG.17 TRP.9 VAL.25 ASN.16 TYR.20 MET.10
2q3sA TOT.199 # CYS.1 GLN.5 ASP.15 SER.17 VAL.15 LYS.11 THR.10 PRO.5 HIS.3 PHE.11 ALA.13 GLY.14 ILE.11 GLU.14 LEU.26 ARG.10 TRP.6 ASN.8 TYR.4
3pa6A TOT.97 # CYS.1 HIS.3 VAL.12 GLN.4 LYS.10 ILE.3 PRO.2 THR.8 PHE.4 ALA.9 GLY.5 ASP.5 GLU.5 LEU.6 ARG.2 TRP.3 ASN.5 TYR.3 SER.7
3pvvA TOT.93 # CYS.1 HIS.2 VAL.4 GLN.5 LYS.4 PRO.2 GLY.4 THR.10 PHE.3 ALA.11 MET.4 ILE.5 LEU.8 ARG.11 ASP.4 GLU.8 TYR.3 SER.4
1ikpA TOT.598 # CYS.8 GLN.27 ASP.35 SER.37 VAL.37 MET.6 ILE.26 PRO.34 LYS.13 THR.26 PHE.14 ALA.68 GLY.56 HIS.15 ASN.21 LEU.65 ARG.41 TRP.10 GLU.41 TYR.18
3hh1A TOT.111 # CYS.1 ILE.5 SER.6 GLN.1 LYS.3 ASN.4 PRO.6 THR.9 PHE.3 ALA.15 HIS.4 GLY.9 ASP.6 LEU.11 ARG.7 VAL.11 GLU.7 TYR.3
1xvsA TOT.120 # CYS.1 GLN.11 ILE.9 SER.8 VAL.13 LYS.4 ASN.3 PRO.6 THR.9 PHE.4 ALA.5 GLY.8 HIS.1 LEU.8 ARG.6 TRP.1 ASP.7 GLU.10 TYR.6
3im6A TOT.161 # CYS.7 GLN.8 HIS.6 SER.18 VAL.11 MET.3 ILE.5 PRO.4 LYS.2 THR.12 PHE.5 GLU.10 GLY.9 ASP.8 LEU.23 ARG.6 TRP.4 ALA.12 ASN.3 TYR.5
2qdqA TOT.34 # ILE.4 GLN.6 LYS.3 ALA.5 GLY.2 LEU.3 ARG.4 GLU.6 MET.1
2furA TOT.180 # CYS.1 GLN.2 ILE.21 SER.16 VAL.11 LYS.12 ASN.8 PRO.9 THR.11 PHE.8 ALA.11 HIS.3 GLY.14 ASP.11 LEU.16 ARG.6 TRP.2 GLU.9 TYR.9
2chcA TOT.157 # CYS.3 GLN.6 ASP.13 ASN.2 VAL.13 MET.2 THR.9 PRO.3 LYS.2 HIS.3 PHE.3 ALA.23 GLY.17 ILE.8 LEU.14 ARG.15 TRP.4 GLU.6 TYR.6 SER.5
1vkmA TOT.280 # ASP.5 GLN.2 VAL.31 LYS.23 ILE.23 PRO.11 THR.16 PHE.10 ALA.16 GLY.22 HIS.9 GLU.41 LEU.29 ARG.18 ASN.7 TYR.2 SER.15
2cuaA TOT.122 # CYS.2 MET.1 GLN.8 ILE.8 ASN.6 VAL.16 LYS.4 TRP.1 PRO.10 THR.9 PHE.6 ALA.7 GLY.12 HIS.3 LEU.4 ARG.5 ASP.3 GLU.9 TYR.6 SER.2
4e72A TOT.212 # CYS.2 HIS.7 SER.10 GLN.12 LYS.11 ILE.8 PRO.20 THR.8 PHE.9 ASN.5 GLY.14 ASP.13 LEU.28 ARG.11 TRP.4 ALA.19 VAL.9 GLU.13 TYR.9
1umrA TOT.135 # CYS.8 GLN.6 ILE.7 SER.13 VAL.8 LYS.13 ASN.5 PRO.4 THR.5 PHE.8 ALA.7 GLY.6 HIS.4 LEU.8 ARG.3 TRP.6 ASP.7 GLU.9 TYR.6 MET.2
1umrC TOT.125 # CYS.8 GLN.6 HIS.6 SER.13 VAL.6 LYS.9 ILE.3 PRO.3 THR.9 PHE.11 ASN.5 GLY.4 ASP.6 LEU.4 ARG.2 TRP.8 ALA.5 GLU.10 TYR.5 MET.2
3m9lA TOT.197 # CYS.3 GLN.2 HIS.10 SER.8 VAL.11 LYS.4 ILE.7 PRO.12 THR.8 PHE.4 ALA.29 GLY.14 ASP.18 ASN.3 LEU.27 ARG.15 TRP.5 GLU.15 TYR.2
2ygbA TOT.533 # CYS.4 GLN.13 HIS.8 SER.53 VAL.49 LYS.32 TRP.2 PRO.26 THR.39 PHE.25 ALA.17 GLY.26 ILE.52 GLU.24 LEU.31 ARG.18 ASP.36 ASN.38 TYR.32 MET.8
4dx8H TOT.158 # CYS.3 GLN.5 HIS.4 SER.8 VAL.13 LYS.11 TRP.1 PRO.10 GLY.5 THR.9 PHE.6 ALA.11 MET.4 ILE.13 GLU.11 LEU.17 ARG.11 ASP.6 ASN.4 TYR.6
4ab5A TOT.210 # CYS.4 ASP.12 VAL.12 GLN.9 LYS.8 ASN.6 PRO.16 THR.9 PHE.8 ALA.20 HIS.5 GLY.13 ILE.18 LEU.23 ARG.11 TRP.4 GLU.17 TYR.7 SER.8
2wphS TOT.225 # CYS.7 MET.1 ILE.17 VAL.21 GLN.5 LYS.15 TRP.5 PRO.7 THR.17 PHE.9 ALA.13 GLY.23 HIS.9 GLU.16 LEU.14 ARG.8 ASP.8 ASN.12 TYR.7 SER.11
4avaA TOT.327 # CYS.1 ASP.22 GLN.11 VAL.38 MET.11 ASN.2 PRO.17 THR.18 PHE.11 ALA.37 HIS.6 GLY.34 ILE.18 LEU.28 ARG.29 TRP.3 GLU.18 TYR.5 SER.18
3e48A TOT.266 # GLN.11 ASP.16 SER.17 VAL.15 LYS.13 ILE.22 PRO.14 THR.12 PHE.12 ALA.21 GLY.20 HIS.11 ASN.14 LEU.22 ARG.11 TRP.2 GLU.15 TYR.18
2z5lA TOT.453 # CYS.5 ASP.25 VAL.41 GLN.7 MET.5 PRO.22 LYS.4 THR.27 PHE.7 ALA.83 HIS.4 GLY.49 ILE.12 GLU.30 LEU.50 ARG.40 TRP.10 ASN.7 TYR.4 SER.21
1zvpA TOT.128 # CYS.1 MET.2 ILE.6 VAL.7 GLN.8 LYS.5 ASN.2 PRO.3 THR.7 PHE.6 ALA.18 GLY.9 HIS.4 LEU.19 ARG.1 ASP.3 GLU.12 TYR.4 SER.11
4j32B TOT.101 # CYS.2 GLN.4 HIS.3 SER.9 VAL.5 LYS.10 ILE.7 THR.4 PHE.2 ALA.8 GLY.3 ASP.7 GLU.9 LEU.10 ARG.4 TRP.1 ASN.5 TYR.7 MET.1
4j32A TOT.157 # CYS.3 ILE.13 SER.10 GLN.3 LYS.9 PRO.9 GLY.17 THR.6 PHE.7 ALA.9 HIS.5 MET.3 ASP.7 GLU.2 LEU.9 ARG.6 TRP.4 VAL.13 ASN.16 TYR.6
1zodA TOT.431 # CYS.5 GLN.8 ILE.25 SER.22 VAL.27 LYS.11 PRO.19 GLY.47 THR.22 PHE.15 ALA.50 HIS.8 MET.13 ASP.27 GLU.24 LEU.52 ARG.33 TRP.2 ASN.9 TYR.12
3rd3A TOT.187 # CYS.5 HIS.4 SER.16 GLN.10 LYS.7 ILE.5 PRO.7 THR.6 PHE.6 ALA.15 GLY.16 ASP.13 GLU.10 LEU.26 ARG.14 TRP.3 VAL.8 ASN.3 TYR.7 MET.6
4efaE TOT.225 # GLN.9 ASP.12 SER.16 VAL.11 LYS.24 ASN.16 PRO.6 THR.8 PHE.3 ALA.18 GLY.7 ILE.20 LEU.27 ARG.10 GLU.28 TYR.5 MET.5
2og9A TOT.354 # CYS.4 ILE.23 VAL.16 GLN.11 LYS.11 ASN.5 PRO.23 THR.17 PHE.12 ALA.47 HIS.13 GLY.33 ASP.20 LEU.39 ARG.24 TRP.9 GLU.22 TYR.7 SER.18
4pyhA TOT.292 # CYS.5 GLN.9 ASP.20 SER.15 VAL.16 LYS.21 ASN.8 PRO.12 THR.19 PHE.12 ALA.15 HIS.7 GLY.23 ILE.20 LEU.28 ARG.18 TRP.4 GLU.21 TYR.12 MET.7
3nrsA TOT.399 # CYS.7 HIS.13 SER.23 GLN.23 LYS.11 ILE.15 PRO.17 THR.19 PHE.10 ALA.51 GLY.32 ASP.21 ASN.7 LEU.49 ARG.23 TRP.7 VAL.35 GLU.23 TYR.9 MET.4
1o75A TOT.399 # CYS.1 ASP.32 SER.33 GLN.9 MET.10 THR.23 PRO.9 LYS.24 HIS.9 PHE.20 ALA.36 GLY.36 ILE.10 GLU.28 LEU.25 ARG.21 TRP.4 VAL.39 ASN.10 TYR.20
3pdwA TOT.257 # CYS.2 GLN.8 HIS.7 SER.14 VAL.20 LYS.11 TRP.1 PRO.9 THR.25 PHE.9 ALA.18 GLY.24 ILE.21 GLU.19 LEU.17 ARG.9 ASP.16 ASN.10 TYR.8 MET.9
2uxqA TOT.402 # CYS.7 GLN.16 ILE.32 SER.16 VAL.25 LYS.30 ASN.11 PRO.13 GLY.27 THR.24 PHE.16 ALA.34 HIS.6 MET.14 ASP.28 LEU.28 ARG.18 TRP.6 GLU.32 TYR.19
1v2xA TOT.191 # CYS.1 ASP.10 GLN.5 VAL.18 MET.3 ASN.5 PRO.9 LYS.8 THR.10 PHE.7 ALA.21 HIS.6 GLY.11 ILE.5 LEU.22 ARG.20 TRP.3 GLU.16 TYR.5 SER.6
2qcpX TOT.80 # ILE.8 SER.5 GLN.7 LYS.7 ASN.3 PRO.4 GLY.4 THR.7 PHE.3 ALA.5 MET.4 HIS.2 LEU.4 ARG.1 TRP.1 ASP.4 VAL.7 GLU.4
2od6A TOT.97 # CYS.1 GLN.1 ILE.3 SER.5 VAL.12 LYS.8 PRO.3 THR.10 PHE.8 ALA.8 GLY.4 ASP.6 GLU.8 LEU.6 ARG.4 TRP.2 ASN.5 TYR.3
4ijnA TOT.369 # CYS.1 GLN.3 ASP.27 SER.26 VAL.33 MET.9 ILE.22 PRO.19 LYS.8 THR.15 PHE.10 ALA.44 GLY.36 HIS.13 ASN.8 LEU.41 ARG.22 TRP.2 GLU.20 TYR.10
3djbA TOT.179 # ASP.11 SER.8 GLN.7 LYS.16 PRO.4 THR.6 PHE.6 GLU.21 HIS.10 GLY.10 ILE.14 LEU.17 ARG.9 TRP.3 ALA.17 VAL.8 ASN.7 TYR.5
3lhiA TOT.226 # CYS.1 THR.12 GLN.10 ILE.11 SER.9 VAL.20 LYS.11 ASN.10 PRO.10 HIS.11 PHE.8 ALA.34 GLY.17 ASP.15 LEU.19 ARG.5 TRP.3 GLU.14 TYR.6
1ua4A TOT.454 # CYS.2 GLN.8 ILE.37 SER.23 VAL.34 LYS.36 ASN.19 PRO.19 GLY.32 THR.19 PHE.22 ALA.35 HIS.8 MET.7 ASP.13 LEU.45 ARG.19 TRP.4 GLU.54 TYR.18
3ahxA TOT.444 # CYS.2 ILE.36 SER.19 GLN.12 LYS.29 ASN.25 PRO.15 ARG.19 THR.18 PHE.22 ALA.37 GLY.30 HIS.13 LEU.33 TRP.12 ASP.32 VAL.17 GLU.34 TYR.29 MET.10
4hs4A TOT.184 # ILE.9 VAL.17 GLN.10 MET.3 PRO.14 LYS.4 THR.11 PHE.6 ALA.27 HIS.3 GLY.12 ASP.7 GLU.8 LEU.22 ARG.9 TRP.1 ASN.5 TYR.4 SER.12
2o9pA TOT.445 # CYS.6 HIS.19 SER.17 GLN.18 VAL.15 LYS.17 TRP.16 PRO.18 THR.25 PHE.26 ALA.26 GLY.42 ILE.35 ASN.18 LEU.33 ARG.20 ASP.23 GLU.40 TYR.17 MET.14
2h9aA TOT.379 # CYS.2 ILE.30 SER.15 GLN.12 LYS.24 ASN.15 PRO.25 ASP.15 THR.21 PHE.15 ALA.41 GLY.26 HIS.5 LEU.42 ARG.12 TRP.2 VAL.31 GLU.30 TYR.13 MET.3
1za0A TOT.232 # CYS.4 ASP.22 SER.3 GLN.7 MET.2 ASN.6 PRO.8 LYS.2 THR.15 PHE.10 ALA.28 HIS.6 GLY.12 ILE.15 LEU.25 ARG.15 TRP.7 VAL.17 GLU.21 TYR.7
2h9aB TOT.307 # CYS.6 GLN.4 HIS.7 SER.13 VAL.29 LYS.19 ILE.23 PRO.19 THR.14 PHE.8 ALA.30 GLY.22 ASP.18 GLU.24 LEU.29 ARG.10 TRP.6 ASN.10 TYR.6 MET.10
3ndhA TOT.214 # GLN.7 ASP.13 SER.12 VAL.13 GLY.13 ILE.21 PRO.9 LYS.19 THR.11 PHE.9 ALA.7 MET.4 HIS.7 ASN.6 LEU.19 ARG.12 TRP.6 GLU.19 TYR.7
4cj7A TOT.425 # CYS.1 GLN.9 ASP.23 SER.27 VAL.48 LYS.18 ASN.10 PRO.23 THR.14 PHE.13 ALA.43 HIS.2 GLY.25 ILE.30 LEU.37 ARG.34 TRP.7 GLU.37 TYR.19 MET.5
2dr1A TOT.381 # CYS.1 ILE.21 SER.17 GLN.5 LYS.40 TRP.3 PRO.21 THR.14 PHE.18 ASN.8 GLY.33 HIS.5 LEU.28 ARG.18 ASP.15 ALA.24 VAL.37 GLU.45 TYR.13 MET.15
4c1bA TOT.171 # CYS.2 GLN.4 ASP.6 SER.13 VAL.10 LYS.7 ILE.13 PRO.10 THR.11 PHE.7 ALA.13 GLY.12 HIS.3 GLU.8 LEU.19 ARG.18 TRP.4 ASN.9 TYR.1 MET.1
2it9A TOT.109 # CYS.1 GLN.2 ASP.7 SER.6 VAL.8 LYS.5 PRO.3 THR.4 PHE.2 ASN.7 HIS.1 GLY.9 ILE.9 LEU.13 ARG.7 TRP.6 ALA.5 GLU.11 TYR.3
4ds1A TOT.86 # ILE.7 GLN.2 VAL.8 LYS.11 ASN.2 PRO.2 THR.7 PHE.5 ALA.5 HIS.3 GLY.6 ASP.7 LEU.7 ARG.1 TRP.1 GLU.3 TYR.5 SER.4
2r6jA TOT.310 # CYS.2 GLN.5 ASP.16 SER.14 VAL.18 LYS.25 PRO.20 GLY.16 THR.17 PHE.17 ALA.22 HIS.6 MET.6 ILE.32 GLU.27 LEU.29 ARG.12 TRP.1 ASN.12 TYR.13
3lkdA TOT.450 # GLN.19 ILE.23 SER.25 VAL.24 LYS.26 ASN.25 PRO.17 THR.27 PHE.26 ALA.40 HIS.10 GLY.26 ASP.37 LEU.48 ARG.15 TRP.3 GLU.34 TYR.25
2e0iA TOT.428 # CYS.4 MET.9 GLN.5 ILE.23 ASN.29 VAL.32 LYS.28 THR.15 PRO.19 HIS.7 PHE.33 ALA.16 GLY.20 ASP.25 LEU.31 ARG.33 TRP.10 GLU.37 TYR.27 SER.25
3e1eA TOT.136 # CYS.2 ASP.5 ASN.2 GLN.4 GLY.10 PRO.5 LYS.3 THR.12 PHE.8 ALA.22 HIS.2 MET.5 ILE.4 LEU.13 ARG.10 VAL.11 GLU.10 TYR.4 SER.4
1wubA TOT.176 # MET.3 ILE.12 VAL.16 GLN.8 LYS.7 ASN.7 PRO.10 THR.8 PHE.4 ALA.18 HIS.4 GLY.13 ASP.9 LEU.14 ARG.11 TRP.4 GLU.14 TYR.2 SER.12
1yqtA TOT.507 # CYS.2 GLN.11 ILE.33 ASN.20 VAL.47 LYS.37 PRO.22 THR.19 PHE.16 ALA.32 HIS.6 GLY.45 ASP.28 LEU.53 ARG.36 TRP.2 GLU.53 TYR.26 SER.19
3hv0A TOT.335 # CYS.5 ILE.29 SER.24 GLN.9 LYS.21 ASN.16 PRO.13 THR.14 PHE.27 ALA.16 HIS.11 GLY.18 ASP.22 LEU.33 ARG.14 TRP.1 VAL.16 GLU.26 TYR.13 MET.7
1uhvA TOT.500 # CYS.4 GLN.9 ILE.33 ASN.25 VAL.37 LYS.35 PRO.27 GLY.31 THR.23 PHE.33 ALA.19 HIS.12 MET.11 ASP.34 LEU.32 ARG.24 TRP.11 GLU.46 TYR.31 SER.23
3fd5A TOT.321 # CYS.8 GLN.15 ILE.21 SER.11 VAL.28 GLY.29 ASN.14 PRO.18 LYS.5 HIS.8 THR.23 ALA.30 MET.17 ASP.16 LEU.31 ARG.12 TRP.3 GLU.17 TYR.6 PHE.9
2rjbA TOT.408 # CYS.6 ILE.20 VAL.23 GLN.33 LYS.7 ASN.13 PRO.23 THR.22 PHE.20 ALA.36 HIS.13 GLY.21 ASP.18 LEU.45 ARG.37 TRP.3 GLU.42 TYR.11 SER.15
4rm4A TOT.359 # CYS.5 GLN.8 ILE.27 SER.25 VAL.24 MET.11 THR.12 PRO.24 LYS.19 HIS.12 PHE.21 ASN.12 GLY.16 ASP.19 LEU.31 ARG.19 TRP.4 ALA.27 GLU.36 TYR.7
4i6yA TOT.374 # CYS.2 ILE.22 VAL.28 GLN.13 MET.12 PRO.17 LYS.7 THR.19 PHE.7 ALA.55 HIS.10 GLY.33 ASP.19 GLU.18 LEU.46 ARG.22 TRP.2 ASN.19 TYR.6 SER.17
1zn8A TOT.173 # CYS.3 MET.1 ILE.7 GLN.6 VAL.13 LYS.6 ASN.1 TRP.1 THR.6 PHE.8 ALA.15 GLY.17 HIS.2 LEU.29 ARG.11 ASP.9 PRO.11 GLU.12 TYR.4 SER.11
4wj0A TOT.309 # MET.4 HIS.9 GLN.7 VAL.12 LYS.27 PRO.11 ASP.11 THR.18 PHE.12 ALA.17 GLY.16 ILE.28 GLU.27 LEU.36 ARG.21 TRP.2 ASN.17 TYR.19 SER.15
2ofkA TOT.177 # CYS.7 GLN.10 ILE.14 SER.10 VAL.8 LYS.9 PRO.7 THR.9 PHE.10 ALA.17 HIS.5 GLY.11 ASP.11 GLU.10 LEU.12 ARG.8 TRP.5 ASN.6 TYR.4 MET.4
3lqvA TOT.113 # ILE.8 SER.2 VAL.8 GLN.3 LYS.11 PRO.7 THR.6 PHE.4 ASN.9 HIS.1 GLY.6 ASP.6 LEU.9 ARG.7 ALA.6 GLU.8 TYR.10 MET.2
3ljbA TOT.219 # ASP.10 VAL.9 GLN.18 LYS.16 PRO.2 GLY.5 THR.12 PHE.17 ALA.10 HIS.9 MET.9 ILE.19 GLU.26 LEU.20 ARG.12 TRP.2 ASN.9 TYR.5 SER.9
1gjwA TOT.636 # CYS.3 HIS.11 GLN.10 VAL.40 MET.11 ILE.39 PRO.48 LYS.60 THR.22 PHE.36 ALA.34 GLY.36 ASP.45 ASN.23 LEU.66 ARG.28 TRP.13 GLU.56 TYR.29 SER.26
2o9sA TOT.67 # MET.1 ILE.7 GLN.3 VAL.4 LYS.3 PRO.4 THR.5 PHE.5 ASN.3 GLY.7 ASP.4 LEU.3 ARG.6 TRP.1 ALA.2 GLU.5 TYR.2 SER.2
2y9mB TOT.113 # CYS.5 ILE.10 SER.9 GLN.2 LYS.10 PRO.3 THR.5 PHE.5 ALA.6 HIS.2 GLY.6 ASP.11 GLU.4 LEU.8 ARG.6 TRP.2 VAL.11 ASN.3 TYR.2 MET.3
2g64A TOT.140 # CYS.1 HIS.5 SER.13 VAL.14 MET.7 TRP.1 PRO.4 LYS.15 THR.10 PHE.7 GLU.11 GLY.6 ILE.4 LEU.10 ARG.5 ASP.8 ALA.5 ASN.9 TYR.5
2y9mA TOT.162 # CYS.6 GLN.3 ILE.18 SER.12 VAL.10 LYS.8 PRO.13 THR.6 PHE.3 ALA.8 HIS.4 GLY.6 ASP.10 GLU.12 LEU.14 ARG.6 TRP.4 ASN.9 TYR.6 MET.4
3i36A TOT.279 # CYS.5 GLN.13 ILE.20 SER.14 VAL.23 LYS.14 TRP.5 PRO.14 GLY.12 THR.16 PHE.11 ALA.14 MET.8 HIS.7 GLU.18 LEU.20 ARG.14 ASP.19 ASN.15 TYR.17
3a8yC TOT.99 # CYS.2 ASP.6 SER.5 GLN.5 LYS.10 PRO.2 THR.2 PHE.2 GLU.12 HIS.2 GLY.4 ILE.3 LEU.15 ARG.5 TRP.2 ALA.9 VAL.5 ASN.5 TYR.3
1txjA TOT.157 # CYS.1 GLN.5 ILE.10 SER.11 VAL.12 LYS.17 PRO.4 THR.7 PHE.11 ALA.5 HIS.1 GLY.8 ASP.15 GLU.14 LEU.9 ARG.4 ASN.6 TYR.12 MET.5
1v7pA TOT.134 # CYS.7 ILE.7 SER.8 GLN.8 LYS.6 TRP.7 PRO.4 THR.4 PHE.7 ASN.9 GLY.8 HIS.4 LEU.6 ARG.6 ASP.9 ALA.6 VAL.7 GLU.13 TYR.6 MET.2
1v7pC TOT.193 # CYS.2 GLN.8 ILE.15 SER.12 VAL.17 LYS.12 PRO.4 THR.13 PHE.8 ALA.17 HIS.2 GLY.14 ASP.11 GLU.10 LEU.15 ARG.7 TRP.1 ASN.13 TYR.9 MET.3
1v7pB TOT.127 # CYS.7 GLN.3 ASP.6 SER.12 VAL.8 LYS.13 ASN.4 PRO.6 THR.5 PHE.9 ALA.8 HIS.3 GLY.4 ILE.4 LEU.6 ARG.6 TRP.8 GLU.9 TYR.3 MET.3
4bu0A TOT.181 # CYS.6 GLN.7 ILE.12 SER.12 VAL.12 LYS.15 ASN.4 PRO.8 THR.13 PHE.7 ALA.9 GLY.10 HIS.4 LEU.19 ARG.9 TRP.5 ASP.12 GLU.9 TYR.7 MET.1
3l0rA TOT.107 # CYS.4 MET.1 ASP.3 VAL.13 GLN.9 LYS.6 ASN.2 PRO.5 THR.10 PHE.3 ALA.7 HIS.2 GLY.5 ILE.5 LEU.3 ARG.4 TRP.2 GLU.10 TYR.5 SER.8
2bs2B TOT.239 # CYS.12 GLN.6 ILE.18 SER.11 VAL.16 LYS.12 ASN.8 PRO.11 THR.10 PHE.12 ALA.13 HIS.5 GLY.15 ASP.19 LEU.19 ARG.15 TRP.2 GLU.18 TYR.6 MET.11
2bs2C TOT.254 # ILE.12 SER.14 GLN.6 LYS.18 PRO.9 THR.18 PHE.23 ALA.15 HIS.7 GLY.18 ASP.10 GLU.9 LEU.31 ARG.9 TRP.9 VAL.17 ASN.5 TYR.10 MET.14
4qheA TOT.281 # CYS.6 GLN.10 HIS.6 SER.20 VAL.14 LYS.20 ILE.8 PRO.19 THR.9 PHE.9 ALA.22 GLY.21 ASP.16 ASN.10 LEU.36 ARG.15 TRP.7 GLU.19 TYR.12 MET.2
3wn4A TOT.746 # CYS.13 MET.6 ASP.40 VAL.23 GLN.23 LYS.38 THR.37 PRO.32 HIS.20 PHE.45 ALA.25 GLY.28 ILE.49 ASN.74 LEU.130 ARG.31 TRP.5 GLU.40 TYR.20 SER.67
2qiwA TOT.247 # ILE.11 SER.19 GLN.8 LYS.8 TRP.5 PRO.9 THR.12 PHE.5 ALA.36 GLY.25 HIS.6 ASN.5 LEU.20 ARG.9 ASP.18 VAL.32 GLU.15 TYR.4
4psyA TOT.158 # CYS.1 GLN.4 HIS.5 SER.9 VAL.11 MET.5 PRO.10 LYS.6 ASP.13 THR.6 PHE.6 ASN.6 GLY.10 ILE.12 LEU.11 ARG.9 TRP.5 ALA.13 GLU.12 TYR.4
2dscA TOT.195 # CYS.5 GLN.5 ILE.12 SER.7 VAL.15 LYS.13 ASN.5 PRO.12 THR.15 PHE.3 ALA.16 HIS.4 GLY.13 ASP.12 LEU.17 ARG.9 TRP.2 GLU.20 TYR.7 MET.3
4m7gA TOT.223 # CYS.6 GLN.11 HIS.4 SER.10 VAL.28 LYS.9 ILE.6 PRO.14 THR.17 PHE.3 ALA.25 GLY.27 ASP.16 GLU.11 LEU.9 ARG.3 TRP.3 ASN.10 TYR.7 MET.4
1zybA TOT.220 # CYS.6 GLN.9 ILE.20 SER.13 VAL.9 LYS.15 PRO.7 THR.14 PHE.12 GLU.15 HIS.13 GLY.7 ASP.14 LEU.30 ARG.7 TRP.1 ALA.9 ASN.12 TYR.7
1t8hA TOT.272 # CYS.9 GLN.8 ILE.10 SER.12 VAL.20 MET.4 PRO.18 LYS.5 ASP.16 THR.14 PHE.10 ALA.30 GLY.29 HIS.8 GLU.15 LEU.24 ARG.21 TRP.7 ASN.6 TYR.6
3hpyA TOT.288 # CYS.7 MET.6 ASP.19 VAL.20 GLN.7 LYS.9 ASN.10 PRO.14 THR.15 PHE.13 ALA.16 HIS.12 GLY.27 ILE.16 LEU.26 ARG.16 TRP.6 GLU.24 TYR.13 SER.12
3fprA TOT.83 # CYS.8 ILE.3 SER.2 GLN.2 LYS.3 PRO.6 THR.8 PHE.2 ALA.4 GLY.10 ASP.5 GLU.4 LEU.5 ARG.6 TRP.1 VAL.3 ASN.6 TYR.4 MET.1
3pd7A TOT.94 # CYS.3 ASP.4 SER.9 GLN.3 LYS.9 PRO.4 THR.4 PHE.2 GLU.7 HIS.6 GLY.5 ILE.3 LEU.8 ARG.5 TRP.1 ALA.4 VAL.8 ASN.4 TYR.5
1o1xA TOT.142 # CYS.1 GLN.1 ASP.9 SER.8 VAL.9 LYS.8 ASN.6 PRO.4 THR.4 PHE.6 ALA.15 HIS.6 GLY.12 ILE.12 LEU.15 ARG.10 TRP.1 GLU.10 TYR.5
4h7nA TOT.461 # CYS.7 GLN.17 ASP.17 SER.25 VAL.36 LYS.17 PRO.26 THR.27 PHE.19 ALA.52 HIS.6 GLY.36 ILE.34 GLU.33 LEU.48 ARG.23 TRP.9 ASN.20 TYR.9
3k7yA TOT.405 # CYS.12 GLN.13 ILE.45 SER.23 VAL.22 LYS.33 PRO.7 THR.16 PHE.23 GLU.27 HIS.10 GLY.17 ASP.20 LEU.46 ARG.11 TRP.2 ALA.10 ASN.45 TYR.19 MET.4
1npeA TOT.263 # CYS.4 ASP.19 SER.12 GLN.10 LYS.13 ILE.18 PRO.13 THR.23 PHE.9 ALA.17 GLY.21 HIS.8 ASN.11 LEU.26 ARG.17 TRP.6 VAL.13 GLU.11 TYR.7 MET.5
2bl0A TOT.62 # GLN.3 HIS.1 ASN.2 VAL.6 LYS.6 PRO.1 ASP.1 PHE.3 ALA.9 GLY.2 ILE.5 LEU.4 ARG.8 TRP.4 GLU.4 TYR.1 SER.2
2o8sA TOT.226 # ILE.11 SER.15 GLN.9 LYS.19 ASN.10 PRO.8 THR.13 PHE.9 ALA.30 HIS.2 GLY.12 ASP.18 LEU.21 ARG.12 TRP.1 VAL.11 GLU.15 TYR.10
1yn8A TOT.59 # GLN.3 HIS.1 SER.4 VAL.5 LYS.2 ILE.3 PRO.2 THR.1 PHE.3 GLU.8 GLY.6 ASP.3 LEU.5 ARG.2 TRP.1 ALA.4 ASN.3 TYR.3
3ngpA TOT.57 # ASP.4 GLN.2 VAL.5 LYS.8 PRO.2 THR.3 PHE.1 ASN.3 GLY.3 ILE.2 LEU.9 ARG.2 TRP.2 ALA.2 GLU.4 TYR.3 SER.2
2ig8A TOT.142 # CYS.1 ASP.9 SER.5 VAL.13 GLN.4 LYS.4 ASN.4 PRO.5 THR.6 PHE.4 ALA.26 HIS.3 GLY.11 ILE.5 LEU.18 ARG.9 TRP.2 GLU.8 TYR.2 MET.3
4q82A TOT.232 # CYS.4 GLN.6 ILE.11 SER.15 VAL.13 LYS.1 PRO.17 THR.10 PHE.7 ALA.29 HIS.7 GLY.24 ASP.18 GLU.13 LEU.19 ARG.14 TRP.7 ASN.8 TYR.9
4g9yA TOT.136 # GLN.7 ASP.9 ASN.3 VAL.13 MET.2 PRO.5 LYS.1 THR.7 PHE.3 ALA.14 HIS.4 GLY.10 ILE.3 LEU.20 ARG.19 TRP.1 GLU.8 TYR.2 SER.5
4mvaA TOT.255 # CYS.3 GLN.11 ILE.19 SER.11 VAL.19 GLY.22 ASN.9 PRO.7 LYS.16 THR.9 PHE.6 ALA.45 HIS.8 MET.7 ASP.10 LEU.17 ARG.8 TRP.2 GLU.21 TYR.5
4n7qA TOT.472 # CYS.6 ILE.31 SER.20 GLN.16 MET.11 THR.25 PRO.23 LYS.26 HIS.20 PHE.15 ALA.46 GLY.32 ASP.26 GLU.38 LEU.38 ARG.24 TRP.11 VAL.29 ASN.18 TYR.17
1lu1A TOT.244 # GLN.5 ASP.14 SER.38 VAL.20 LYS.5 PRO.12 THR.17 PHE.12 ALA.23 HIS.3 GLY.16 ILE.16 GLU.9 LEU.21 ARG.5 TRP.4 ASN.14 TYR.9 MET.1
2hthB TOT.129 # CYS.2 GLN.8 ILE.12 SER.9 VAL.6 LYS.9 PRO.5 GLY.8 THR.5 PHE.6 ASN.4 HIS.5 MET.2 ASP.3 LEU.12 ARG.9 TRP.3 ALA.6 GLU.12 TYR.3
3vdyA TOT.101 # CYS.2 GLN.3 ASP.5 SER.6 VAL.13 LYS.4 ASN.6 PRO.1 THR.9 PHE.3 ALA.10 HIS.2 GLY.6 ILE.2 LEU.8 ARG.7 TRP.1 GLU.5 TYR.5 MET.3
3oigA TOT.260 # CYS.3 GLN.1 ILE.21 SER.20 VAL.18 LYS.10 ASN.15 PRO.6 THR.16 PHE.9 ALA.27 HIS.7 GLY.22 ASP.12 LEU.24 ARG.15 TRP.1 GLU.20 TYR.6 MET.7
2bv6A TOT.135 # CYS.1 ILE.5 VAL.14 GLN.7 LYS.12 ASN.8 PRO.4 THR.7 PHE.5 ALA.6 HIS.2 GLY.2 ASP.7 LEU.18 ARG.8 TRP.1 GLU.11 TYR.5 SER.12
4uopA TOT.408 # ILE.23 SER.31 GLN.19 LYS.30 TRP.2 PRO.21 GLY.25 THR.26 PHE.25 ALA.17 MET.9 HIS.6 GLU.23 LEU.26 ARG.11 ASP.34 VAL.22 ASN.31 TYR.27
1he1A TOT.135 # GLN.11 ILE.5 SER.15 VAL.9 LYS.3 PRO.3 THR.7 PHE.1 ALA.18 HIS.2 GLY.12 ASP.4 LEU.20 ARG.10 TRP.1 GLU.11 MET.3
4citA TOT.409 # CYS.1 GLN.10 ASP.29 SER.30 VAL.28 GLY.19 PRO.28 LYS.26 THR.21 PHE.18 ASN.18 HIS.9 MET.11 ILE.28 LEU.22 ARG.17 TRP.8 ALA.39 GLU.29 TYR.18
2icyA TOT.459 # CYS.3 GLN.12 ILE.28 SER.32 VAL.48 LYS.43 PRO.24 ASP.26 THR.27 PHE.19 ALA.23 GLY.29 HIS.7 GLU.30 LEU.46 ARG.10 TRP.5 ASN.30 TYR.10 MET.7
3gfsA TOT.167 # HIS.4 GLN.5 VAL.16 MET.5 PRO.6 LYS.12 THR.6 PHE.5 ALA.18 GLY.11 ILE.10 GLU.13 LEU.20 ARG.6 ASP.6 ASN.9 TYR.5 SER.10
4idcA TOT.321 # GLN.3 ILE.12 SER.22 VAL.41 LYS.30 ASN.6 PRO.21 THR.20 PHE.12 ALA.35 HIS.4 GLY.26 ASP.18 LEU.30 ARG.6 TRP.1 GLU.22 TYR.12
3eevA TOT.207 # CYS.3 GLN.6 HIS.8 SER.21 VAL.14 GLY.18 ILE.16 PRO.9 LYS.8 THR.7 PHE.13 ALA.12 MET.7 ASP.16 ASN.9 LEU.9 ARG.8 TRP.7 GLU.8 TYR.8
4l0cA TOT.247 # CYS.3 GLN.10 ASP.17 SER.13 VAL.21 LYS.5 ASN.4 PRO.14 HIS.8 THR.16 ALA.27 GLY.20 ILE.18 LEU.21 ARG.16 TRP.6 GLU.12 TYR.9 PHE.7
4iv6A TOT.375 # CYS.4 ILE.14 SER.19 VAL.31 GLN.15 LYS.18 PRO.14 THR.19 PHE.11 ASN.7 HIS.6 GLY.37 ASP.21 LEU.36 ARG.22 TRP.3 ALA.41 GLU.29 TYR.12 MET.16
3mx7A TOT.90 # ILE.6 SER.4 VAL.9 LYS.11 ASN.2 GLY.8 THR.7 PHE.4 ALA.7 HIS.2 MET.3 ASP.5 LEU.5 ARG.2 TRP.2 GLU.8 TYR.5
4h0pA TOT.431 # CYS.7 GLN.4 ASP.23 SER.35 VAL.27 LYS.34 PHE.16 PRO.14 HIS.21 THR.23 ASN.16 GLY.36 ILE.26 LEU.46 ARG.12 TRP.4 ALA.33 GLU.37 TYR.10 MET.7
4nazA TOT.127 # CYS.1 MET.1 GLN.1 ILE.11 ASN.10 VAL.2 LYS.9 PRO.3 ASP.8 THR.8 PHE.8 ALA.5 GLY.5 HIS.10 LEU.16 ARG.5 TRP.2 GLU.8 TYR.8 SER.6
2a90A TOT.155 # GLN.9 HIS.5 SER.17 VAL.9 LYS.6 PRO.11 ASP.6 THR.10 PHE.3 ALA.12 GLY.9 ILE.6 GLU.8 LEU.12 ARG.12 TRP.6 ASN.7 TYR.7
1jr1A TOT.417 # CYS.7 GLN.20 ASP.24 SER.22 VAL.32 MET.12 ASN.14 PRO.12 LYS.29 THR.24 PHE.13 ALA.44 HIS.8 GLY.40 ILE.29 LEU.39 ARG.15 GLU.19 TYR.14
3cngA TOT.173 # CYS.6 ILE.15 GLN.6 VAL.10 LYS.9 THR.5 PRO.13 HIS.7 PHE.8 GLU.17 GLY.11 ASP.5 LEU.17 ARG.12 TRP.3 ALA.11 ASN.7 TYR.7 SER.4
1mkfA TOT.371 # CYS.11 ASP.16 SER.37 GLN.17 VAL.35 LYS.13 ASN.11 PRO.25 THR.28 PHE.10 ALA.20 GLY.24 HIS.8 ILE.11 LEU.34 ARG.10 TRP.5 GLU.28 TYR.15 MET.13
3iruA TOT.264 # CYS.3 ILE.17 GLN.13 VAL.21 LYS.12 ASN.9 PRO.12 THR.12 PHE.9 ALA.29 HIS.4 GLY.26 ASP.15 LEU.22 ARG.16 TRP.5 GLU.21 TYR.6 SER.12
2p08A TOT.107 # GLN.7 ILE.10 SER.6 VAL.4 LYS.5 ASN.3 PRO.8 THR.4 PHE.10 ALA.5 GLY.5 HIS.3 LEU.13 ARG.5 TRP.1 ASP.3 GLU.10 TYR.1 MET.4
2ha8A TOT.159 # CYS.5 ASP.5 GLN.15 VAL.14 LYS.8 ASN.4 PRO.7 THR.7 PHE.3 ALA.6 HIS.2 GLY.11 ILE.13 LEU.25 ARG.5 TRP.2 GLU.10 TYR.4 SER.13
3ax2A TOT.70 # CYS.1 ILE.2 VAL.5 GLN.10 LYS.4 ASN.1 PRO.4 GLY.5 THR.3 PHE.3 ALA.5 MET.1 HIS.1 LEU.13 ASP.4 GLU.6 TYR.1 SER.1
2wjvD TOT.54 # CYS.1 ILE.2 GLN.6 VAL.4 LYS.2 PRO.3 GLY.1 THR.2 PHE.3 ALA.4 MET.6 HIS.1 GLU.3 LEU.6 ARG.1 ASP.4 ASN.3 SER.2
1nh2B TOT.46 # ILE.4 VAL.5 GLN.3 LYS.3 THR.2 PHE.1 GLU.8 GLY.1 ASP.3 LEU.3 ARG.2 TRP.1 ALA.3 ASN.4 TYR.1 SER.2
1nh2C TOT.50 # CYS.2 ASP.4 VAL.5 GLN.2 LYS.5 GLY.1 THR.4 PHE.1 ASN.3 MET.1 ILE.2 LEU.5 ARG.3 TRP.2 ALA.3 GLU.3 TYR.3 SER.1
1nh2D TOT.102 # CYS.3 GLN.3 ASP.9 SER.9 VAL.12 LYS.7 ASN.5 THR.9 PHE.3 ALA.5 GLY.5 ILE.6 LEU.10 ARG.5 TRP.1 GLU.5 TYR.4 MET.1
3ll7A TOT.388 # CYS.3 ASP.18 VAL.21 GLN.10 LYS.23 ASN.11 PRO.26 THR.21 PHE.13 ALA.32 HIS.9 GLY.18 ILE.32 LEU.52 ARG.22 TRP.4 GLU.28 TYR.15 SER.30
4izhA TOT.360 # CYS.1 HIS.8 SER.12 GLN.11 MET.10 ILE.15 PRO.23 LYS.18 THR.16 PHE.6 ALA.51 GLY.29 ASP.9 ASN.5 LEU.40 ARG.24 TRP.1 VAL.41 GLU.33 TYR.7
1d1qA TOT.159 # CYS.3 ASP.10 SER.9 GLN.7 LYS.19 PRO.5 THR.7 PHE.11 GLU.12 HIS.6 GLY.10 ILE.16 LEU.6 ARG.3 TRP.2 ALA.6 VAL.7 ASN.12 TYR.6 MET.2
3onoA TOT.205 # CYS.6 HIS.6 SER.9 GLN.9 LYS.10 TRP.1 PRO.5 THR.7 PHE.11 ASN.16 GLY.21 ILE.11 LEU.18 ARG.4 ASP.7 ALA.28 VAL.18 GLU.13 TYR.5
1nu5A TOT.357 # CYS.2 GLN.10 ILE.25 SER.26 VAL.30 MET.6 ASN.10 PRO.13 LYS.12 THR.21 PHE.6 ALA.43 HIS.9 GLY.32 ASP.24 LEU.39 ARG.19 TRP.5 GLU.19 TYR.6
4p22A TOT.370 # CYS.6 MET.9 ILE.17 GLN.21 VAL.34 LYS.15 ASN.14 PRO.17 THR.13 PHE.20 ALA.32 HIS.7 GLY.30 ASP.21 LEU.40 ARG.17 TRP.2 GLU.22 TYR.9 SER.24
3rtyA TOT.306 # CYS.9 ILE.19 SER.27 GLN.10 LYS.19 ASN.5 PRO.14 THR.22 PHE.16 ALA.19 HIS.8 GLY.14 ASP.14 LEU.24 ARG.20 TRP.3 VAL.23 GLU.21 TYR.10 MET.9
1hpiA TOT.71 # CYS.4 MET.1 ASP.5 GLN.4 VAL.4 LYS.1 ASN.2 PRO.4 THR.3 PHE.1 ALA.10 GLY.4 HIS.2 LEU.6 ARG.3 TRP.3 GLU.5 TYR.3 SER.6
4duiA TOT.162 # GLN.3 ASP.15 SER.4 VAL.12 LYS.7 ILE.11 PRO.3 THR.7 PHE.2 ALA.21 GLY.15 HIS.15 GLU.10 LEU.24 ARG.2 TRP.1 ASN.7 TYR.1 MET.2
4r7rA TOT.121 # CYS.1 GLN.1 ASP.14 SER.10 VAL.7 LYS.12 THR.2 PRO.6 HIS.1 PHE.5 ASN.11 GLY.1 ILE.13 LEU.16 ARG.3 TRP.1 ALA.2 GLU.7 TYR.8
3u7iA TOT.211 # ILE.17 VAL.16 GLN.10 LYS.17 PRO.5 THR.14 PHE.8 GLU.18 HIS.4 GLY.9 ASP.13 LEU.18 ARG.7 TRP.2 ALA.13 ASN.14 TYR.12 SER.14
2z5wA TOT.136 # GLN.4 ASP.4 SER.13 VAL.13 LYS.3 PRO.7 THR.15 PHE.5 ALA.12 GLY.18 ILE.16 GLU.3 LEU.16 ASN.5 TYR.2
2qtqA TOT.191 # CYS.2 GLN.4 ASP.18 SER.12 VAL.11 LYS.6 THR.8 PRO.6 HIS.5 PHE.9 ASN.8 GLY.10 ILE.10 LEU.29 ARG.16 ALA.18 GLU.9 TYR.10
2qjfA TOT.385 # CYS.6 ASP.22 GLN.13 VAL.27 GLY.26 ASN.13 PRO.24 LYS.23 THR.21 PHE.14 ALA.29 HIS.15 MET.17 ILE.11 LEU.41 ARG.24 TRP.9 GLU.29 TYR.15 SER.6
2w9qA TOT.87 # HIS.1 VAL.10 GLN.4 LYS.13 ASN.8 PRO.2 THR.3 PHE.5 ALA.8 GLY.3 ILE.6 LEU.5 ARG.1 TRP.2 ASP.4 GLU.7 TYR.4 MET.1
1j5pA TOT.235 # CYS.1 MET.4 ASP.10 VAL.25 GLN.2 LYS.18 PRO.10 THR.9 PHE.14 ASN.12 HIS.4 GLY.15 ILE.27 LEU.18 ARG.10 ALA.12 GLU.17 TYR.6 SER.21
3lewA TOT.460 # CYS.5 GLN.14 HIS.10 SER.28 VAL.19 LYS.29 ILE.25 PRO.13 THR.28 PHE.19 ALA.43 GLY.28 ASP.35 GLU.27 LEU.42 ARG.21 TRP.9 ASN.33 TYR.32
3nojA TOT.235 # CYS.4 ASP.17 SER.11 GLN.9 LYS.7 ASN.8 PRO.7 GLY.24 THR.12 PHE.3 ALA.24 HIS.2 MET.4 ILE.12 LEU.26 ARG.19 TRP.2 VAL.27 GLU.14 TYR.3
3l46A TOT.84 # CYS.2 ASP.5 SER.4 GLN.4 MET.5 PRO.5 LYS.4 THR.4 PHE.5 ASN.2 HIS.1 GLY.7 ILE.3 LEU.8 ARG.2 TRP.2 ALA.2 VAL.6 GLU.9 TYR.4
1k3vA TOT.542 # CYS.3 HIS.16 SER.30 GLN.31 MET.13 TRP.10 PRO.45 LYS.18 THR.62 PHE.22 ALA.29 GLY.33 ILE.31 GLU.23 LEU.45 ARG.18 ASP.22 VAL.19 ASN.48 TYR.24
3r1mA TOT.356 # ASP.24 SER.11 GLN.7 MET.14 ASN.11 PRO.24 LYS.17 THR.18 PHE.15 ALA.36 HIS.12 GLY.30 ILE.19 LEU.38 ARG.20 TRP.2 VAL.24 GLU.21 TYR.13
1byiA TOT.224 # CYS.2 GLN.10 ILE.9 SER.12 VAL.16 LYS.8 ASN.8 PRO.14 GLY.18 THR.20 PHE.5 ALA.29 HIS.4 MET.4 ASP.7 LEU.25 ARG.8 TRP.5 GLU.13 TYR.7
2vhhA TOT.345 # CYS.5 ILE.25 ASN.20 GLN.11 LYS.22 PRO.18 GLY.22 THR.21 PHE.16 ALA.29 HIS.9 MET.9 ASP.11 LEU.23 ARG.21 TRP.6 VAL.20 GLU.32 TYR.9 SER.16
2xauA TOT.745 # CYS.7 GLN.32 ILE.46 SER.46 VAL.46 LYS.42 ASN.26 PRO.42 THR.38 PHE.30 ALA.49 HIS.21 GLY.36 ASP.46 LEU.75 ARG.48 TRP.3 GLU.65 TYR.30 MET.17
3wcqA TOT.97 # CYS.6 ASP.8 SER.7 GLN.10 MET.1 ASN.2 PRO.2 LYS.5 THR.5 PHE.2 ALA.8 HIS.1 GLY.7 ILE.7 LEU.7 ARG.1 VAL.7 GLU.6 TYR.5
2eifA TOT.128 # CYS.1 MET.4 HIS.1 GLN.6 VAL.18 LYS.11 ASN.1 PRO.8 THR.5 PHE.2 ALA.5 GLY.16 ILE.14 LEU.6 ARG.4 ASP.5 GLU.12 TYR.4 SER.5
3t38A TOT.196 # CYS.3 GLN.5 HIS.8 SER.17 VAL.14 LYS.7 ASN.6 PRO.9 THR.7 PHE.5 ALA.19 GLY.12 ILE.19 LEU.21 ARG.10 TRP.2 ASP.9 GLU.16 TYR.7
4uc1A TOT.157 # CYS.1 ASP.4 GLN.4 VAL.9 MET.10 PRO.9 LYS.3 THR.12 PHE.13 ALA.26 GLY.7 ILE.1 GLU.4 LEU.21 ARG.6 TRP.12 ASN.8 TYR.4 SER.3
2i7cA TOT.281 # CYS.9 GLN.5 ILE.26 SER.17 VAL.21 LYS.32 PRO.10 THR.15 PHE.14 GLU.24 HIS.4 GLY.16 ASP.12 LEU.20 ARG.2 TRP.3 ALA.12 ASN.17 TYR.17 MET.5
4gu7A TOT.310 # CYS.2 GLN.5 ASP.27 SER.19 VAL.25 MET.7 ASN.2 PRO.19 LYS.4 THR.20 PHE.18 ALA.33 HIS.7 GLY.29 ILE.10 LEU.30 ARG.24 TRP.2 GLU.22 TYR.5
2qltA TOT.251 # CYS.3 ASP.21 SER.8 GLN.3 LYS.26 PRO.15 THR.10 PHE.13 ALA.27 HIS.6 GLY.17 ILE.21 GLU.19 LEU.17 ARG.6 TRP.5 VAL.14 ASN.9 TYR.9 MET.2
3vgiA TOT.270 # GLN.4 ILE.27 SER.14 VAL.17 LYS.12 ASN.20 PRO.20 THR.22 PHE.9 ALA.15 HIS.3 GLY.19 ASP.13 LEU.21 ARG.7 TRP.11 GLU.19 TYR.15 MET.2
2gu1A TOT.321 # ILE.22 GLN.13 VAL.26 MET.8 THR.13 PRO.12 LYS.21 HIS.11 PHE.14 GLU.15 GLY.27 ASP.21 LEU.28 ARG.20 TRP.1 ALA.20 ASN.12 TYR.14 SER.23
3m73A TOT.311 # CYS.1 GLN.8 ILE.25 SER.21 VAL.22 GLY.24 PRO.14 LYS.7 THR.13 PHE.28 ALA.30 HIS.7 MET.8 ASP.4 GLU.11 LEU.48 ARG.9 TRP.9 ASN.8 TYR.14
2ppqA TOT.307 # CYS.5 GLN.4 ILE.11 SER.15 VAL.13 LYS.20 ASN.10 PRO.15 THR.12 PHE.15 ALA.29 HIS.7 GLY.21 ASP.20 LEU.51 ARG.16 TRP.6 GLU.26 TYR.11
3u52E TOT.118 # CYS.1 ASP.9 SER.5 GLN.3 LYS.9 ASN.5 PRO.9 THR.6 PHE.7 ALA.14 HIS.4 GLY.6 ILE.2 LEU.15 TRP.2 VAL.6 GLU.6 TYR.5 MET.4
3u52C TOT.318 # CYS.2 ASP.22 SER.17 GLN.15 LYS.15 PRO.10 THR.19 PHE.9 ASN.11 HIS.7 GLY.17 ILE.13 LEU.30 ARG.22 TRP.10 ALA.29 VAL.13 GLU.27 TYR.14 MET.16
3u52A TOT.494 # CYS.8 MET.16 ILE.24 ASN.19 GLN.30 LYS.31 PRO.21 ASP.33 THR.20 PHE.31 ALA.34 GLY.26 HIS.22 LEU.33 ARG.20 TRP.15 VAL.20 GLU.34 TYR.31 SER.26
1vjwA TOT.58 # CYS.6 MET.1 ASP.8 GLN.2 VAL.6 LYS.4 ASN.1 PRO.4 THR.2 PHE.1 ALA.7 GLY.5 ILE.2 LEU.4 ARG.1 GLU.2 SER.2
1gtvA TOT.203 # CYS.1 THR.6 ASP.12 GLN.8 VAL.16 LYS.4 ASN.3 PRO.5 MET.2 HIS.4 PHE.4 ALA.43 GLY.22 ILE.6 LEU.20 ARG.19 TRP.4 GLU.8 TYR.7 SER.9
3d2qA TOT.66 # CYS.6 HIS.3 SER.2 GLN.2 LYS.3 ASN.5 PRO.3 THR.4 PHE.2 ALA.4 GLY.3 ASP.6 ILE.2 LEU.2 ARG.7 VAL.3 GLU.4 TYR.3 MET.2
1juvA TOT.193 # CYS.1 GLN.6 ILE.12 SER.13 VAL.18 GLY.13 ASN.5 PRO.9 LYS.12 THR.15 PHE.8 ALA.11 HIS.4 MET.5 ASP.13 LEU.17 ARG.9 TRP.3 GLU.10 TYR.9
3w5jA TOT.186 # GLN.12 ASP.10 SER.9 VAL.14 GLY.13 ASN.9 PRO.8 LYS.6 THR.10 PHE.5 ALA.13 HIS.4 MET.9 ILE.15 LEU.27 ARG.9 TRP.1 GLU.9 TYR.3
2oaiA TOT.77 # CYS.1 ILE.7 VAL.4 GLN.1 PRO.2 THR.3 PHE.3 ALA.5 HIS.2 GLY.8 ASP.7 GLU.7 LEU.11 ARG.6 TRP.2 ASN.3 TYR.3 SER.2
2p2oA TOT.184 # CYS.3 ASP.9 SER.4 VAL.19 LYS.11 PRO.9 THR.8 PHE.7 ASN.12 HIS.7 GLY.20 ILE.12 LEU.15 ARG.11 TRP.2 ALA.11 GLU.15 TYR.7 MET.2
1m1zA TOT.480 # CYS.2 GLN.5 HIS.16 SER.25 VAL.46 GLY.40 ILE.11 PRO.30 LYS.6 THR.37 PHE.10 GLU.27 MET.6 ASP.34 LEU.57 ARG.42 TRP.5 ALA.67 ASN.5 TYR.9
3m4rA TOT.199 # CYS.1 HIS.6 GLN.2 VAL.16 LYS.10 ILE.17 PRO.9 THR.13 PHE.9 ALA.15 GLY.17 ASP.18 ASN.10 LEU.16 ARG.9 TRP.1 GLU.9 TYR.5 SER.16
1utgA TOT.70 # CYS.2 ASP.4 SER.5 GLN.2 LYS.7 PRO.5 GLY.3 THR.6 PHE.2 ASN.2 HIS.1 MET.5 ILE.4 LEU.8 ARG.2 ALA.2 VAL.3 GLU.6 TYR.1
1fvpA TOT.231 # CYS.3 GLN.9 ILE.16 SER.15 VAL.17 LYS.21 PRO.4 GLY.6 HIS.3 PHE.11 THR.10 MET.5 ASP.18 GLU.14 LEU.23 ARG.4 TRP.2 ALA.13 ASN.25 TYR.12
2rkqA TOT.168 # CYS.2 GLN.11 ILE.8 SER.10 VAL.9 LYS.9 TRP.3 PRO.10 THR.5 PHE.5 ALA.20 GLY.15 HIS.4 GLU.12 LEU.13 ARG.7 ASP.6 ASN.10 TYR.5 MET.4
4r2fA TOT.394 # GLN.17 ASP.20 SER.23 VAL.29 LYS.30 PRO.18 GLY.38 THR.25 PHE.21 ASN.24 HIS.2 MET.10 ILE.18 LEU.32 ARG.4 TRP.8 ALA.44 GLU.19 TYR.12
4rt5A TOT.99 # CYS.2 ASP.8 SER.11 GLN.5 LYS.3 ASN.2 PRO.5 THR.7 PHE.3 ALA.7 HIS.6 GLY.5 ILE.6 LEU.10 ARG.4 TRP.2 VAL.5 GLU.4 TYR.4
1bgvA TOT.449 # CYS.2 ASP.24 SER.20 GLN.16 MET.17 ILE.20 PRO.20 LYS.27 THR.17 PHE.19 GLU.34 GLY.48 HIS.6 LEU.27 ARG.18 TRP.5 ALA.43 VAL.45 ASN.20 TYR.21
3ktdA TOT.310 # CYS.2 GLN.7 ASP.21 SER.26 VAL.29 LYS.5 ILE.15 PRO.12 THR.16 PHE.7 ALA.45 GLY.27 HIS.12 ASN.11 LEU.32 ARG.18 TRP.5 GLU.14 TYR.6
3tcmA TOT.479 # CYS.9 GLN.23 HIS.10 SER.32 VAL.32 LYS.26 TRP.2 PRO.26 THR.16 PHE.19 ALA.46 GLY.38 ILE.34 GLU.32 LEU.45 ARG.21 ASP.21 ASN.20 TYR.21 MET.6
1qtoA TOT.122 # CYS.1 GLN.1 ILE.4 SER.6 VAL.14 LYS.2 THR.9 PRO.7 HIS.4 PHE.7 ALA.15 GLY.10 ASP.12 GLU.8 LEU.5 ARG.8 TRP.3 ASN.3 TYR.1 MET.2
4ej0A TOT.330 # CYS.4 GLN.15 ASP.20 SER.13 VAL.28 MET.6 ASN.14 PRO.10 LYS.14 THR.15 PHE.26 ALA.34 GLY.30 HIS.4 ILE.10 LEU.24 ARG.24 TRP.1 GLU.22 TYR.16
3lqkA TOT.177 # CYS.2 HIS.4 GLN.8 VAL.16 LYS.12 TRP.1 PRO.14 THR.16 PHE.7 ALA.14 GLY.15 ILE.12 GLU.10 LEU.14 ARG.5 ASP.5 ASN.11 TYR.3 SER.8
4gmnB TOT.19 # HIS.1 SER.2 GLN.1 LYS.3 THR.1 PHE.3 ALA.2 LEU.1 ARG.1 VAL.1 ASN.1 TYR.2
1vioA TOT.227 # CYS.4 ILE.14 SER.14 GLN.10 LYS.15 ASN.8 PRO.8 HIS.6 PHE.6 THR.13 GLY.16 ASP.14 LEU.25 ARG.10 TRP.3 ALA.13 VAL.16 GLU.21 TYR.9 MET.2
1jsxA TOT.193 # CYS.1 GLN.10 HIS.8 SER.11 VAL.18 GLY.12 ILE.12 PRO.13 LYS.10 THR.3 PHE.7 ASN.7 MET.5 ASP.9 LEU.26 ARG.10 TRP.2 ALA.9 GLU.16 TYR.4
2r1fA TOT.252 # ASP.14 SER.11 GLN.9 LYS.21 PRO.13 THR.22 PHE.7 ASN.10 HIS.6 GLY.16 ILE.9 LEU.25 ARG.13 TRP.5 ALA.28 VAL.14 GLU.16 TYR.13
2p3wA TOT.110 # MET.3 ILE.8 GLN.4 VAL.12 LYS.3 THR.3 PRO.7 HIS.1 PHE.4 ALA.4 GLY.12 ASP.7 GLU.7 LEU.10 ARG.8 TRP.1 ASN.4 TYR.1 SER.11
3moyA TOT.256 # CYS.3 GLN.7 ASP.18 ASN.4 VAL.16 MET.7 PRO.10 LYS.4 THR.21 PHE.8 ALA.42 HIS.2 GLY.21 ILE.12 LEU.27 ARG.23 TRP.1 GLU.18 TYR.4 SER.8
1pchA TOT.87 # ILE.13 SER.6 GLN.6 LYS.8 PRO.1 GLY.5 THR.7 PHE.2 GLU.3 MET.4 HIS.1 LEU.4 ASP.5 ALA.14 VAL.3 ASN.5
4kezA TOT.313 # CYS.2 ASP.24 SER.10 VAL.19 GLN.6 LYS.26 THR.19 PRO.13 HIS.8 PHE.17 ASN.15 GLY.23 ILE.37 LEU.23 ARG.15 TRP.2 ALA.18 GLU.22 TYR.9 MET.5
4ovrA TOT.288 # CYS.2 GLN.13 ASP.20 SER.22 VAL.23 LYS.23 ASN.11 PRO.16 THR.14 PHE.12 ALA.28 HIS.5 GLY.17 ILE.17 LEU.23 ARG.13 TRP.3 GLU.17 TYR.9
3oufA TOT.93 # GLN.3 ILE.11 SER.6 VAL.10 LYS.3 PRO.4 THR.9 PHE.10 ASN.2 HIS.1 GLY.8 ASP.4 LEU.13 ARG.1 ALA.2 GLU.2 TYR.4
2x4jA TOT.109 # CYS.3 GLN.1 ILE.11 SER.4 VAL.17 LYS.10 THR.2 PRO.3 HIS.2 PHE.3 GLU.6 GLY.11 ASP.6 LEU.8 ARG.3 TRP.2 ALA.5 ASN.5 TYR.6 MET.1
2rdqA TOT.265 # CYS.2 ASP.19 SER.18 GLN.6 LYS.7 ASN.8 PRO.18 GLY.17 THR.18 PHE.17 ALA.16 HIS.14 MET.8 ILE.9 LEU.22 ARG.18 TRP.3 VAL.17 GLU.19 TYR.9
3oblA TOT.132 # ASP.6 SER.10 GLN.7 LYS.1 PRO.4 THR.9 PHE.2 ALA.8 HIS.1 GLY.24 ILE.6 GLU.10 LEU.7 ARG.3 TRP.6 VAL.8 ASN.14 TYR.4 MET.2
4jcnA TOT.216 # MET.2 ILE.21 VAL.22 GLN.9 LYS.9 THR.10 PRO.13 HIS.7 PHE.6 ALA.6 GLY.24 ASP.10 GLU.9 LEU.8 ARG.6 TRP.1 ASN.27 TYR.11 SER.15
2xjaA TOT.483 # CYS.2 ASP.38 VAL.53 GLN.10 MET.6 THR.34 PRO.28 LYS.3 HIS.14 PHE.10 ALA.89 GLY.53 ILE.21 ASN.5 LEU.44 ARG.36 TRP.2 GLU.16 TYR.5 SER.14
3ioyA TOT.275 # CYS.3 ASP.16 SER.15 GLN.9 LYS.11 PRO.10 THR.8 PHE.14 ALA.29 HIS.7 GLY.28 ILE.13 GLU.22 LEU.21 ARG.16 TRP.2 VAL.28 ASN.10 TYR.7 MET.6
4mowA TOT.243 # GLN.5 ASP.12 SER.18 VAL.29 LYS.6 ASN.9 PRO.7 THR.16 PHE.4 ALA.39 GLY.29 HIS.4 ILE.19 LEU.17 ARG.9 TRP.1 GLU.12 TYR.5 MET.2
4f0jA TOT.301 # CYS.2 ASP.17 SER.12 GLN.22 LYS.11 ASN.7 PRO.16 THR.14 PHE.9 ALA.35 HIS.7 GLY.25 ILE.11 LEU.33 ARG.21 TRP.7 VAL.19 GLU.15 TYR.18
2fk9A TOT.140 # CYS.2 GLN.7 ASP.6 SER.7 VAL.14 LYS.7 ASN.5 PRO.6 THR.15 PHE.8 ALA.5 GLY.12 HIS.6 ILE.2 LEU.16 ARG.6 TRP.2 GLU.9 TYR.4 MET.1
4qtcA TOT.328 # CYS.8 ASP.19 SER.25 GLN.13 LYS.25 ILE.21 PRO.12 GLY.20 THR.20 PHE.18 GLU.21 MET.7 HIS.13 LEU.39 ARG.12 TRP.4 ALA.13 VAL.16 ASN.13 TYR.9
3mb4A TOT.111 # CYS.1 GLN.3 ILE.5 SER.6 VAL.6 LYS.10 PRO.5 THR.5 PHE.3 ALA.5 HIS.2 GLY.2 ASP.9 GLU.8 LEU.12 ARG.6 ASN.6 TYR.8 MET.9
3am6A TOT.224 # CYS.3 ILE.21 SER.10 GLN.4 LYS.9 THR.11 PRO.5 HIS.4 PHE.13 ALA.26 GLY.16 ASP.10 GLU.8 LEU.20 ARG.3 TRP.7 VAL.23 ASN.5 TYR.13 MET.13
2fshA TOT.691 # CYS.1 GLN.27 HIS.13 SER.33 ASN.30 VAL.44 LYS.38 PRO.25 ASP.40 THR.34 PHE.21 ALA.65 GLY.40 ILE.43 LEU.63 ARG.51 TRP.6 GLU.71 TYR.21 MET.25
4jzuA TOT.157 # CYS.2 GLN.5 ASP.8 SER.9 VAL.11 LYS.20 ILE.7 PRO.7 THR.4 PHE.10 ASN.4 GLY.10 HIS.3 LEU.14 ARG.5 TRP.3 ALA.6 GLU.18 TYR.8 MET.3
1pujA TOT.261 # CYS.1 GLN.9 ILE.27 ASN.12 VAL.15 LYS.23 PRO.11 GLY.17 THR.9 PHE.8 ALA.18 HIS.3 MET.6 ASP.15 LEU.28 ARG.19 TRP.3 GLU.23 TYR.4 SER.10
1rroA TOT.108 # CYS.1 GLN.9 ILE.6 SER.11 VAL.2 LYS.7 ASN.2 PRO.2 GLY.6 THR.5 PHE.8 ALA.9 HIS.1 MET.3 ASP.15 LEU.8 ARG.2 GLU.9 TYR.2
3wt1A TOT.244 # CYS.2 GLN.7 ASP.15 SER.9 VAL.16 LYS.25 ASN.8 PRO.16 THR.11 PHE.14 ALA.30 HIS.2 GLY.17 ILE.20 LEU.13 ARG.4 TRP.1 GLU.23 TYR.10 MET.1
2qywA TOT.92 # GLN.3 ASP.4 SER.4 VAL.3 LYS.8 ILE.1 PRO.3 THR.4 PHE.4 ALA.9 GLY.4 HIS.3 ASN.3 LEU.13 ARG.9 GLU.15 TYR.2
4meeA TOT.281 # MET.7 ILE.15 GLN.15 VAL.14 LYS.10 PRO.5 ASP.8 THR.24 PHE.8 GLU.14 GLY.41 HIS.6 LEU.20 ARG.5 TRP.7 ALA.21 ASN.29 TYR.13 SER.19
3qowA TOT.313 # CYS.3 GLN.9 ILE.18 SER.19 VAL.21 MET.9 ASN.14 PRO.17 LYS.20 ASP.19 THR.17 PHE.13 ALA.18 GLY.15 HIS.11 LEU.27 ARG.17 TRP.7 GLU.26 TYR.13
4f1hB TOT.251 # CYS.8 ASP.16 SER.16 GLN.11 LYS.15 ASN.9 PRO.9 THR.17 PHE.11 ALA.16 HIS.4 GLY.14 ILE.13 LEU.26 ARG.15 TRP.4 VAL.17 GLU.13 TYR.11 MET.6
3qfiA TOT.261 # GLN.12 ILE.21 SER.12 VAL.18 LYS.17 PRO.6 THR.22 PHE.7 ALA.17 HIS.5 GLY.17 ASP.28 GLU.15 LEU.21 ARG.11 TRP.1 ASN.11 TYR.11 MET.9
3m1aA TOT.265 # ASP.17 VAL.24 GLN.6 LYS.6 ASN.4 PRO.10 THR.17 PHE.13 ALA.42 HIS.2 GLY.27 ILE.8 LEU.26 ARG.20 TRP.2 GLU.21 TYR.5 SER.15
4hamA TOT.133 # GLN.9 ILE.15 SER.8 VAL.12 LYS.14 THR.9 PRO.3 HIS.1 PHE.3 GLU.14 GLY.9 ASP.5 LEU.11 ARG.4 ALA.6 ASN.6 TYR.4
3gx8A TOT.111 # CYS.2 GLN.3 ASP.5 SER.6 VAL.7 MET.2 ASN.3 PRO.8 LYS.6 THR.5 PHE.6 ALA.11 GLY.9 ILE.8 LEU.10 ARG.4 TRP.1 GLU.13 TYR.2
2ao7A TOT.146 # CYS.23 ASP.7 SER.10 GLN.6 LYS.13 ILE.5 PRO.9 GLY.11 THR.10 PHE.5 ALA.7 MET.3 HIS.4 GLU.7 LEU.6 ARG.6 TRP.1 VAL.4 ASN.6 TYR.3
3klyA TOT.256 # CYS.4 MET.12 ILE.22 VAL.25 GLN.7 LYS.11 PRO.5 ASP.4 THR.13 PHE.19 ALA.25 GLY.26 HIS.5 GLU.5 LEU.31 ARG.3 TRP.6 ASN.11 TYR.8 SER.14
4wwfA TOT.110 # CYS.1 GLN.4 HIS.4 SER.2 VAL.6 LYS.4 TRP.1 PRO.5 THR.3 PHE.2 ALA.18 GLY.5 ILE.5 ASN.3 LEU.12 ARG.13 ASP.7 GLU.14 TYR.1
1bj7A TOT.150 # CYS.4 GLN.4 ASP.7 SER.6 VAL.9 LYS.9 PRO.7 THR.11 PHE.3 ASN.11 HIS.1 GLY.10 ILE.12 LEU.13 ARG.7 TRP.1 ALA.5 GLU.18 TYR.10 MET.2
3ql6A TOT.594 # CYS.15 GLN.27 ASP.32 SER.31 VAL.28 LYS.33 PRO.41 THR.27 PHE.31 ALA.37 HIS.14 GLY.40 ILE.27 GLU.32 LEU.65 ARG.38 TRP.14 ASN.36 TYR.15 MET.11
1txlA TOT.188 # CYS.2 GLN.9 ASP.15 SER.14 VAL.10 LYS.18 ILE.10 PRO.8 THR.9 PHE.8 ALA.9 GLY.11 HIS.7 GLU.15 LEU.10 ARG.4 TRP.3 ASN.8 TYR.13 MET.5
2r4rA TOT.190 # CYS.7 GLN.6 ILE.17 SER.15 VAL.22 LYS.9 ASN.5 PRO.6 THR.12 PHE.15 ALA.13 HIS.2 GLY.10 ASP.5 LEU.22 ARG.10 TRP.1 GLU.5 TYR.5 MET.3
4rdqA TOT.361 # CYS.6 ASP.18 SER.29 GLN.13 MET.7 ASN.15 PRO.18 LYS.10 THR.15 PHE.24 ALA.19 HIS.5 GLY.15 ILE.19 LEU.49 ARG.20 TRP.10 VAL.28 GLU.20 TYR.21
1ve4A TOT.198 # CYS.1 GLN.3 HIS.2 SER.6 ASN.4 VAL.24 LYS.10 ILE.7 PRO.8 THR.8 PHE.5 ALA.22 GLY.19 ASP.11 LEU.32 ARG.19 GLU.12 TYR.3 MET.2
1noaA TOT.113 # CYS.4 GLN.3 ASP.8 SER.11 VAL.12 LYS.1 PRO.4 THR.13 PHE.5 ALA.18 GLY.15 ILE.1 GLU.2 LEU.6 ARG.3 TRP.2 ASN.4 TYR.1
2hr3A TOT.124 # CYS.1 GLN.4 ILE.2 SER.9 VAL.7 ASN.4 PRO.4 HIS.3 THR.7 ALA.19 GLY.8 ASP.5 LEU.22 ARG.14 TRP.1 GLU.11 TYR.1 PHE.2
3pe5A TOT.266 # GLN.6 ASP.24 SER.12 VAL.21 LYS.9 PRO.11 THR.25 PHE.12 ASN.13 HIS.2 GLY.27 ILE.16 LEU.23 ARG.15 TRP.2 ALA.17 GLU.17 TYR.14
4qc6A TOT.179 # CYS.2 GLN.3 HIS.5 SER.3 VAL.7 LYS.15 TRP.3 PRO.8 THR.7 PHE.7 ASN.9 GLY.10 ILE.17 LEU.14 ARG.10 ASP.13 ALA.4 GLU.20 TYR.17 MET.5
1l3iA TOT.178 # CYS.5 ILE.17 GLN.2 VAL.16 LYS.7 PRO.10 THR.11 PHE.3 GLU.14 HIS.1 GLY.20 ASP.13 LEU.18 ARG.13 ALA.14 ASN.8 TYR.2 SER.4
1piwA TOT.360 # CYS.10 GLN.7 ASP.20 SER.26 VAL.32 LYS.30 ASN.10 PRO.18 THR.12 PHE.11 ALA.19 HIS.11 GLY.38 ILE.24 LEU.24 ARG.11 TRP.4 GLU.25 TYR.17 MET.11
1g0cA TOT.357 # GLN.8 ASP.23 SER.21 VAL.22 LYS.10 ILE.18 PRO.21 THR.15 PHE.11 ASN.29 GLY.34 HIS.11 LEU.24 ARG.11 TRP.11 ALA.32 GLU.31 TYR.16 MET.9
1s4kA TOT.115 # CYS.2 GLN.6 ASP.7 SER.6 THR.6 LYS.4 ASN.8 PRO.3 HIS.1 PHE.5 ALA.11 GLY.3 ILE.15 LEU.8 ARG.11 TRP.3 VAL.2 GLU.10 TYR.4
2x65A TOT.334 # CYS.3 GLN.3 ASP.22 SER.15 VAL.34 LYS.37 ASN.9 PRO.19 GLY.17 THR.16 PHE.17 ALA.17 HIS.4 MET.6 ILE.19 LEU.26 ARG.15 TRP.7 GLU.39 TYR.9
1u19A TOT.348 # CYS.10 GLN.12 ILE.22 SER.15 VAL.31 GLY.23 ASN.15 PRO.20 LYS.11 ASP.5 THR.27 PHE.31 ALA.29 MET.16 HIS.6 LEU.28 ARG.7 TRP.5 GLU.17 TYR.18
1f94A TOT.62 # CYS.10 ILE.3 SER.3 VAL.2 LYS.5 THR.8 PHE.1 ALA.2 HIS.1 GLY.3 ASP.1 GLU.4 LEU.4 ARG.2 TRP.3 ASN.6 TYR.3 MET.1
1wmwA TOT.328 # ASP.16 GLN.8 VAL.13 MET.6 ASN.3 PRO.20 LYS.9 THR.9 PHE.8 ALA.51 GLY.28 HIS.10 ILE.4 LEU.63 ARG.29 TRP.5 GLU.33 TYR.10 SER.3
3ndcA TOT.236 # CYS.4 GLN.6 HIS.8 ASN.3 VAL.20 MET.4 ILE.14 PRO.14 LYS.2 THR.16 PHE.4 ALA.37 GLY.19 ASP.11 LEU.28 ARG.14 TRP.3 GLU.11 TYR.3 SER.15
4c9lA TOT.408 # CYS.2 ILE.23 VAL.30 GLN.10 LYS.12 ASN.7 PRO.30 GLY.31 THR.22 PHE.17 ALA.31 MET.11 HIS.16 LEU.43 ARG.34 ASP.26 TRP.6 GLU.34 TYR.8 SER.15
2w9jA TOT.66 # GLN.4 ILE.3 SER.6 VAL.7 LYS.6 PRO.1 GLY.2 THR.4 PHE.4 ALA.5 MET.1 ASP.4 GLU.5 LEU.9 ARG.1 ASN.2 TYR.2
2ch5A TOT.344 # CYS.6 GLN.10 ILE.23 SER.26 VAL.18 LYS.13 PRO.13 THR.12 PHE.16 ASN.8 HIS.10 GLY.41 ASP.20 LEU.37 ARG.19 TRP.5 ALA.30 GLU.18 TYR.11 MET.8
4o7jA TOT.154 # ASP.14 SER.12 GLN.7 MET.3 ILE.5 PRO.6 LYS.7 THR.12 PHE.9 ALA.8 GLY.7 HIS.3 ASN.8 LEU.15 ARG.7 TRP.2 VAL.13 GLU.7 TYR.9
1bmtA TOT.246 # CYS.1 ASP.11 SER.10 GLN.13 LYS.16 ASN.10 PRO.8 GLY.20 THR.16 PHE.6 ALA.19 HIS.3 MET.8 ILE.16 LEU.17 ARG.13 TRP.2 VAL.29 GLU.22 TYR.6
4wuiA TOT.205 # CYS.3 GLN.5 HIS.8 SER.14 VAL.19 LYS.3 ASN.2 PRO.15 ASP.15 THR.19 PHE.4 ALA.35 GLY.15 ILE.8 LEU.18 ARG.9 TRP.4 GLU.4 TYR.4 MET.1
3r2cJ TOT.79 # ILE.10 SER.4 GLN.4 LYS.7 PRO.5 GLY.4 THR.5 PHE.2 ALA.3 HIS.1 MET.2 ASP.4 LEU.7 ARG.7 VAL.7 GLU.6 TYR.1
2f20A TOT.226 # CYS.2 GLN.6 ILE.21 SER.16 VAL.11 LYS.16 ASN.10 PRO.13 THR.16 PHE.12 ALA.15 HIS.5 GLY.6 ASP.16 LEU.12 ARG.13 TRP.5 GLU.20 TYR.11
1qqp2 TOT.216 # CYS.3 ILE.6 SER.11 GLN.8 LYS.9 PRO.11 ASP.9 THR.26 PHE.10 GLU.11 GLY.15 HIS.8 LEU.17 ARG.9 TRP.3 ALA.12 VAL.24 ASN.11 TYR.9 MET.4
1qqp3 TOT.220 # CYS.4 GLN.6 ASP.15 SER.10 VAL.15 MET.5 PRO.16 LYS.9 THR.21 PHE.13 ALA.27 HIS.5 GLY.17 ILE.5 GLU.8 LEU.17 ARG.7 TRP.2 ASN.7 TYR.11
3r2cA TOT.138 # ASP.9 SER.6 VAL.12 LYS.16 PRO.2 THR.3 PHE.5 ALA.11 HIS.2 GLY.9 ILE.11 GLU.13 LEU.13 ARG.10 TRP.2 ASN.5 TYR.8 MET.1
1qqp1 TOT.186 # CYS.2 GLN.7 HIS.7 SER.7 VAL.14 LYS.9 TRP.1 PRO.14 THR.22 PHE.4 GLU.10 GLY.8 ILE.8 LEU.17 ARG.11 ASP.7 ALA.18 ASN.8 TYR.9 MET.3
1qqp4 TOT.46 # ASP.2 SER.7 GLN.4 MET.2 LYS.1 THR.2 PHE.3 ALA.4 GLY.5 ILE.2 LEU.5 TRP.1 ASN.5 TYR.3
2wyhA TOT.893 # CYS.10 ILE.51 SER.60 GLN.52 LYS.41 ASN.44 PRO.40 THR.68 PHE.42 ALA.67 HIS.26 GLY.45 ASP.58 LEU.90 ARG.43 TRP.14 VAL.33 GLU.55 TYR.35 MET.19
4ip2B TOT.495 # CYS.4 HIS.20 GLN.17 VAL.40 MET.11 ASN.11 PRO.38 LYS.4 THR.23 PHE.18 ALA.59 GLY.43 ASP.27 ILE.22 LEU.47 ARG.41 TRP.11 GLU.29 TYR.11 SER.19
2pmuA TOT.98 # GLN.1 ASP.6 SER.5 VAL.12 LYS.5 ASN.2 PRO.4 THR.7 PHE.4 ALA.3 HIS.3 GLY.7 ILE.4 LEU.12 ARG.8 TRP.2 GLU.8 TYR.5
4kisA TOT.315 # CYS.5 ASP.17 SER.17 GLN.9 GLY.14 PRO.3 LYS.35 THR.12 PHE.11 ALA.10 HIS.13 MET.6 ILE.24 GLU.31 LEU.29 ARG.18 TRP.3 VAL.15 ASN.22 TYR.21
3e38A TOT.326 # CYS.5 GLN.13 HIS.15 SER.14 VAL.19 LYS.18 ILE.20 PRO.13 THR.24 PHE.18 ALA.19 GLY.21 ASP.26 GLU.22 LEU.30 ARG.20 TRP.6 ASN.12 TYR.11
3dghA TOT.477 # CYS.7 MET.5 ASP.29 VAL.50 GLN.14 LYS.31 ASN.13 PRO.20 THR.30 PHE.14 ALA.40 HIS.9 GLY.49 ILE.26 LEU.44 ARG.21 TRP.5 GLU.29 TYR.21 SER.20
1z41A TOT.327 # PRO.13 CYS.2 ILE.29 SER.19 GLN.16 LYS.19 ASN.7 TRP.4 THR.14 PHE.16 ALA.36 GLY.26 HIS.11 LEU.21 ARG.17 ASP.22 VAL.19 GLU.28 TYR.8
3a7nA TOT.231 # CYS.2 GLN.4 ASP.9 SER.16 VAL.17 LYS.2 ILE.7 PRO.23 THR.8 PHE.9 ALA.33 GLY.19 HIS.6 GLU.10 LEU.25 ARG.18 TRP.6 ASN.8 TYR.4 MET.5
3zbhA TOT.90 # ILE.6 SER.8 GLN.11 MET.2 ASN.4 PRO.2 LYS.1 ASP.3 THR.5 PHE.2 ALA.7 GLY.4 HIS.2 LEU.10 ARG.5 TRP.1 VAL.5 GLU.10 TYR.2
4bgqA TOT.259 # CYS.5 GLN.10 ILE.14 SER.12 VAL.18 MET.7 THR.8 PRO.15 LYS.17 HIS.9 PHE.12 ALA.8 GLY.16 ASP.10 GLU.19 LEU.40 ARG.13 TRP.3 ASN.13 TYR.10
3fyfA TOT.148 # MET.3 ILE.9 ASN.20 GLN.9 LYS.6 PRO.2 THR.10 PHE.6 ALA.10 GLY.15 ASP.5 LEU.6 ARG.3 TRP.1 VAL.18 GLU.7 TYR.8 SER.10
2w8xA TOT.72 # CYS.8 HIS.9 SER.7 GLN.3 LYS.1 ILE.1 PRO.2 THR.1 PHE.1 GLU.4 GLY.5 ASP.3 LEU.5 ARG.8 TRP.1 ALA.2 VAL.1 ASN.7 TYR.2 MET.1
2yeoA TOT.65 # CYS.8 MET.1 GLN.1 ILE.2 ASN.6 VAL.4 LYS.4 PRO.3 THR.1 PHE.1 ALA.6 GLY.5 ASP.3 LEU.3 ARG.4 TRP.2 GLU.2 TYR.7 SER.2
4q37A TOT.105 # CYS.1 ILE.7 SER.5 VAL.7 MET.3 ASN.3 PRO.5 LYS.4 THR.7 PHE.9 ALA.6 GLY.9 HIS.3 LEU.11 ARG.5 TRP.1 ASP.7 GLU.8 TYR.4
4ku4A TOT.171 # CYS.3 GLN.4 ASP.10 SER.11 VAL.16 LYS.11 ASN.4 PRO.4 THR.13 PHE.9 ALA.11 GLY.13 HIS.2 ILE.8 LEU.17 ARG.15 TRP.1 GLU.16 TYR.2 MET.1
2f4wA TOT.147 # CYS.4 MET.3 ILE.9 GLN.4 VAL.9 LYS.11 PRO.14 ASP.4 THR.10 PHE.9 GLU.11 GLY.8 HIS.2 LEU.14 ARG.7 TRP.3 ALA.5 ASN.5 TYR.7 SER.8
4oqrA TOT.386 # CYS.2 GLN.12 ILE.21 SER.14 VAL.31 LYS.13 ASN.7 PRO.33 ASP.26 THR.25 PHE.15 ALA.39 GLY.22 HIS.12 LEU.45 ARG.27 TRP.4 GLU.23 TYR.6 MET.9
2o99A TOT.170 # CYS.3 HIS.10 GLN.6 VAL.10 LYS.8 ASN.3 PRO.6 THR.9 PHE.5 ALA.20 GLY.14 ILE.12 LEU.17 ARG.10 ASP.9 GLU.13 TYR.3 SER.12
3d2lA TOT.227 # CYS.3 ASP.19 SER.8 GLN.10 LYS.6 ILE.10 PRO.11 THR.19 PHE.12 ALA.19 GLY.13 HIS.7 GLU.23 LEU.20 ARG.10 TRP.5 VAL.18 ASN.3 TYR.11
3mjfA TOT.418 # CYS.4 ILE.25 GLN.21 VAL.37 LYS.16 PRO.19 THR.22 PHE.14 ALA.57 HIS.9 GLY.51 ASP.27 GLU.26 LEU.31 ARG.17 TRP.4 ASN.16 TYR.11 SER.11
2ovlA TOT.346 # CYS.2 ASP.29 SER.13 GLN.3 LYS.10 ASN.8 PRO.17 THR.23 PHE.9 ALA.41 GLY.33 HIS.16 ILE.17 LEU.38 ARG.25 TRP.7 VAL.28 GLU.17 TYR.10
4q9nA TOT.291 # MET.9 GLN.5 ILE.22 SER.25 VAL.16 LYS.13 PRO.14 HIS.5 THR.14 ALA.36 GLY.29 ASP.13 GLU.16 LEU.28 ARG.9 TRP.5 ASN.9 TYR.12 PHE.11
4iibA TOT.834 # CYS.7 MET.11 HIS.15 VAL.67 GLN.31 LYS.33 ILE.31 PRO.45 THR.49 PHE.28 ALA.74 GLY.89 ASP.50 GLU.40 LEU.65 ARG.32 TRP.20 ASN.53 TYR.37 SER.57
1t3eP TOT.2 # ALA.2
4i16A TOT.90 # CYS.2 HIS.2 SER.3 GLN.3 LYS.6 GLY.4 PRO.5 ASP.5 THR.3 PHE.2 ALA.5 MET.2 ILE.4 GLU.7 LEU.13 ARG.6 TRP.1 VAL.6 ASN.5 TYR.6
1x7vA TOT.96 # CYS.1 ASP.6 SER.4 GLN.6 LYS.1 ILE.4 PRO.3 THR.5 PHE.3 ALA.13 GLY.3 HIS.7 ASN.3 LEU.14 ARG.9 TRP.1 VAL.2 GLU.8 TYR.3
4bmoA TOT.290 # GLN.13 ILE.20 SER.15 VAL.19 LYS.18 THR.14 PRO.6 GLY.17 HIS.5 PHE.14 ASN.13 MET.10 ASP.11 LEU.34 ARG.8 TRP.5 ALA.19 GLU.36 TYR.13
1t0fC TOT.49 # ILE.3 SER.4 GLN.3 LYS.6 PHE.1 PRO.3 HIS.1 THR.2 ALA.1 GLY.2 ASP.5 LEU.4 ARG.3 TRP.1 VAL.4 GLU.2 TYR.2 MET.2
1t0fA TOT.264 # CYS.4 ILE.22 SER.20 GLN.16 LYS.17 TRP.5 PRO.10 THR.9 PHE.11 ALA.15 GLY.12 HIS.7 ASN.9 LEU.27 ARG.14 ASP.15 VAL.19 GLU.24 TYR.6 MET.2
1m2tA TOT.247 # CYS.1 GLN.18 HIS.2 SER.23 VAL.17 LYS.1 ILE.19 PRO.11 THR.20 PHE.12 ALA.21 GLY.18 ASP.12 ASN.11 LEU.23 ARG.13 TRP.2 GLU.10 TYR.10 MET.3
1m2tB TOT.262 # CYS.7 ASP.14 SER.19 GLN.15 MET.5 PRO.11 LYS.6 THR.25 PHE.4 ALA.18 HIS.1 GLY.26 ILE.20 GLU.7 LEU.18 ARG.13 TRP.8 VAL.17 ASN.20 TYR.8
2i8dA TOT.112 # HIS.5 SER.4 GLN.10 LYS.4 ILE.10 PRO.9 THR.9 PHE.9 ALA.8 GLY.4 ASP.9 GLU.5 LEU.9 ARG.5 TRP.4 VAL.2 ASN.3 TYR.3
1xv2A TOT.227 # GLN.12 ILE.14 SER.8 VAL.16 LYS.13 ASN.10 PRO.8 THR.13 PHE.17 ALA.18 HIS.11 GLY.18 ASP.14 LEU.18 ARG.8 GLU.22 TYR.7
1uekA TOT.268 # GLN.4 HIS.4 SER.11 VAL.19 LYS.4 ASN.3 PRO.23 THR.4 PHE.14 ALA.37 GLY.34 ASP.8 ILE.3 LEU.40 ARG.26 TRP.3 GLU.21 TYR.7 MET.3
3db5A TOT.116 # CYS.4 ILE.9 GLN.6 VAL.9 LYS.2 ASN.7 PRO.9 THR.8 PHE.7 ALA.3 GLY.6 HIS.3 LEU.9 ARG.7 TRP.3 ASP.4 GLU.10 TYR.4 SER.6
3n8bA TOT.72 # GLN.1 ILE.4 SER.7 VAL.6 LYS.7 PRO.1 THR.2 PHE.6 GLU.12 HIS.1 GLY.3 ASP.2 LEU.3 ARG.5 ALA.2 ASN.6 TYR.4
1zl0A TOT.306 # CYS.5 GLN.13 HIS.15 SER.19 VAL.17 MET.2 ASN.4 PRO.18 LYS.3 THR.10 PHE.5 ALA.34 GLY.34 ASP.13 ILE.14 LEU.44 ARG.23 TRP.6 GLU.18 TYR.9
1nw9B TOT.238 # CYS.11 MET.4 ILE.11 GLN.8 VAL.17 LYS.13 TRP.3 PRO.11 THR.10 PHE.16 ALA.14 GLY.19 HIS.6 GLU.10 LEU.26 ARG.11 ASP.11 ASN.9 TYR.5 SER.23
1w2yA TOT.226 # CYS.6 GLN.6 ILE.22 ASN.22 VAL.7 GLY.13 PRO.1 LYS.21 THR.11 PHE.10 ALA.7 HIS.3 MET.3 ASP.11 LEU.26 ARG.4 TRP.7 GLU.25 TYR.12 SER.9
1zpsA TOT.124 # CYS.3 GLN.3 ILE.5 SER.6 VAL.14 GLY.11 THR.6 PRO.1 LYS.6 HIS.5 PHE.3 GLU.10 MET.2 ASP.10 LEU.11 ARG.9 TRP.2 ALA.8 ASN.5 TYR.4
2b6nA TOT.272 # CYS.4 GLN.4 ASP.19 SER.31 VAL.22 LYS.6 ASN.27 PRO.9 THR.24 PHE.6 ALA.35 GLY.30 HIS.5 ILE.12 LEU.14 ARG.7 TRP.3 GLU.2 TYR.10 MET.2
4n67A TOT.201 # CYS.3 HIS.8 SER.7 GLN.9 LYS.12 ILE.7 PRO.12 THR.12 PHE.14 GLU.16 GLY.11 ASP.7 LEU.16 ARG.14 TRP.2 ALA.21 VAL.5 ASN.10 TYR.7 MET.8
2ccvA TOT.98 # CYS.3 GLN.4 ILE.7 SER.13 VAL.8 LYS.5 ASN.4 PRO.6 THR.5 PHE.2 ALA.6 HIS.1 GLY.5 ASP.7 LEU.6 ARG.6 TRP.3 GLU.2 TYR.4 MET.1
2fgeA TOT.959 # CYS.12 GLN.32 ASP.68 SER.73 VAL.67 LYS.68 ASN.41 PRO.47 THR.47 PHE.45 ALA.52 HIS.19 GLY.68 ILE.47 LEU.109 ARG.43 TRP.9 GLU.82 TYR.30
1q5xA TOT.159 # CYS.2 GLN.6 ASP.15 SER.7 VAL.17 LYS.2 PRO.3 THR.4 PHE.7 GLU.13 HIS.1 GLY.21 ILE.11 LEU.16 ARG.8 TRP.1 ALA.12 ASN.7 TYR.5 MET.1
4ajyC TOT.87 # CYS.2 ILE.7 ASN.4 VAL.6 LYS.5 PRO.5 GLY.3 THR.5 PHE.5 ALA.6 MET.4 HIS.3 LEU.8 ARG.2 ASP.2 GLU.8 TYR.4 SER.8
4ajyB TOT.102 # CYS.2 MET.3 ILE.5 GLN.4 VAL.5 LYS.7 PRO.9 THR.9 PHE.7 ALA.7 HIS.1 GLY.5 ASP.8 LEU.10 ARG.6 GLU.8 TYR.1 SER.5
4ag7A TOT.165 # CYS.2 GLN.7 ASP.11 SER.16 VAL.19 LYS.10 PRO.7 THR.5 PHE.11 GLU.9 HIS.4 GLY.9 ILE.6 LEU.17 ARG.8 ALA.9 ASN.6 TYR.4 MET.5
4ajyV TOT.138 # CYS.2 ASP.7 GLN.5 VAL.14 LYS.2 ILE.5 PRO.14 THR.7 PHE.5 ALA.3 GLY.7 HIS.4 GLU.7 LEU.19 ARG.14 TRP.2 ASN.8 TYR.5 SER.8
1emsA TOT.412 # CYS.9 ASP.25 GLN.13 VAL.30 LYS.21 ASN.18 PRO.20 THR.23 PHE.19 ALA.34 HIS.20 GLY.21 LEU.36 ILE.20 SER.23 ARG.24 TRP.5 GLU.27 TYR.10 MET.14
4qnwA TOT.369 # CYS.5 HIS.10 VAL.26 GLN.20 LYS.13 ASN.9 PRO.22 GLY.25 THR.16 PHE.17 ALA.41 MET.10 ASP.20 ILE.19 LEU.27 ARG.25 TRP.6 GLU.22 TYR.16 SER.20
1yrkA TOT.126 # CYS.2 ILE.4 SER.8 VAL.11 GLN.7 LYS.10 ASN.4 PRO.6 ASP.3 THR.5 PHE.6 ALA.12 GLY.6 HIS.2 LEU.11 ARG.5 TRP.2 GLU.13 TYR.4 MET.5
1t90A TOT.484 # CYS.6 GLN.8 ILE.32 SER.23 VAL.43 LYS.34 ASN.29 PRO.22 THR.25 PHE.27 ALA.46 HIS.6 GLY.39 ASP.23 LEU.34 ARG.18 TRP.5 GLU.40 TYR.13 MET.11
4cosA TOT.297 # CYS.19 ASP.12 SER.11 GLN.13 LYS.21 PRO.21 GLY.11 THR.14 PHE.16 ALA.21 HIS.9 MET.10 ILE.17 GLU.20 LEU.21 ARG.10 TRP.7 VAL.16 ASN.15 TYR.13
1zceA TOT.139 # CYS.4 GLN.4 ILE.3 SER.10 VAL.13 LYS.12 PRO.9 THR.5 PHE.3 ALA.9 HIS.2 GLY.10 ASP.9 GLU.13 LEU.10 ARG.6 TRP.5 ASN.7 TYR.5
2hk9A TOT.269 # CYS.1 GLN.6 ILE.21 SER.10 VAL.28 LYS.32 PRO.11 THR.9 PHE.12 GLU.23 HIS.2 GLY.19 ASP.11 LEU.28 ARG.6 TRP.4 ALA.21 ASN.13 TYR.10 MET.2
3dkaA TOT.133 # GLN.6 HIS.9 SER.8 VAL.9 LYS.9 ASN.7 PRO.3 THR.10 PHE.6 ALA.10 GLY.5 ILE.7 LEU.15 ARG.5 ASP.3 GLU.16 TYR.5
4jzjC TOT.250 # CYS.8 ASP.13 SER.19 VAL.17 GLN.15 LYS.9 PRO.14 THR.16 PHE.13 ASN.14 HIS.5 GLY.9 ILE.14 LEU.17 ARG.18 TRP.7 ALA.18 GLU.10 TYR.9 MET.5
3be4A TOT.213 # CYS.3 GLN.5 ILE.21 SER.11 VAL.16 LYS.18 TRP.1 PRO.11 THR.8 PHE.8 ALA.11 GLY.22 HIS.5 GLU.17 LEU.20 ARG.8 ASP.14 ASN.8 TYR.5 MET.1
2xigA TOT.135 # CYS.4 GLN.5 ILE.13 SER.15 VAL.8 LYS.7 TRP.1 PRO.2 THR.5 PHE.4 ASN.6 GLY.4 HIS.7 LEU.11 ARG.10 ASP.4 ALA.4 GLU.17 TYR.4 MET.4
4mlmA TOT.183 # CYS.4 ASP.13 SER.17 GLN.7 LYS.13 PRO.3 THR.3 PHE.5 ALA.13 HIS.7 GLY.15 ILE.5 GLU.19 LEU.22 ARG.11 TRP.2 VAL.9 ASN.6 TYR.9
2h8nA TOT.68 # HIS.5 SER.1 GLN.19 LYS.4 PRO.1 PHE.1 ALA.6 MET.2 ILE.4 LEU.11 ARG.4 GLU.10
3coxA TOT.473 # CYS.1 ASP.27 SER.28 GLN.16 LYS.17 PRO.22 THR.39 PHE.21 GLU.18 HIS.4 GLY.58 ILE.24 LEU.32 ARG.16 TRP.9 ALA.42 VAL.39 ASN.27 TYR.19 MET.14
4eytA TOT.96 # CYS.3 MET.1 ILE.13 VAL.4 GLN.8 LYS.8 PRO.2 THR.2 PHE.3 ALA.4 HIS.2 GLY.4 ASP.5 GLU.7 LEU.8 ARG.4 TRP.1 ASN.10 TYR.5 SER.2
2cvdA TOT.198 # CYS.3 ILE.14 SER.5 GLN.9 LYS.12 ASN.8 PRO.10 ARG.10 THR.14 PHE.8 ALA.13 GLY.7 HIS.5 LEU.23 TRP.6 ASP.15 VAL.9 GLU.12 TYR.9 MET.6
1a6yA TOT.77 # CYS.9 GLN.4 ILE.4 SER.5 VAL.6 LYS.6 HIS.1 PHE.5 GLU.2 GLY.7 ASP.2 LEU.5 ARG.10 ALA.3 ASN.5 TYR.2 MET.1
1o54A TOT.256 # CYS.4 GLN.3 ILE.19 SER.12 VAL.22 LYS.17 THR.13 PRO.12 HIS.6 PHE.12 GLU.23 GLY.18 ASP.19 LEU.22 ARG.16 TRP.4 ALA.16 ASN.5 TYR.6 MET.7
4o8hA TOT.161 # CYS.4 GLN.3 ILE.8 SER.11 VAL.15 LYS.11 ASN.9 PRO.7 THR.11 PHE.11 ALA.7 HIS.5 GLY.22 ASP.9 LEU.10 ARG.5 TRP.1 GLU.6 TYR.3 MET.3
3pfrA TOT.412 # CYS.6 ASP.29 VAL.27 GLN.10 LYS.25 PRO.24 THR.24 PHE.15 GLU.23 HIS.15 GLY.37 ILE.28 LEU.38 ARG.18 TRP.9 ALA.36 ASN.23 TYR.11 SER.14
4qdyA TOT.180 # GLN.7 ASP.13 SER.16 VAL.24 LYS.6 PRO.11 THR.21 PHE.4 GLU.10 GLY.10 ILE.19 LEU.11 ARG.6 ALA.11 ASN.7 TYR.4
3ubcA TOT.131 # CYS.1 GLN.10 ILE.10 SER.7 VAL.9 LYS.11 PRO.5 THR.5 PHE.4 ALA.7 HIS.2 GLY.10 ASP.5 GLU.11 LEU.16 ARG.4 TRP.2 ASN.5 TYR.5 MET.2
2z00A TOT.422 # CYS.1 GLN.4 ASP.22 SER.11 VAL.29 LYS.17 ASN.6 PRO.35 THR.22 PHE.10 ALA.54 GLY.40 HIS.13 ILE.8 LEU.73 ARG.33 TRP.3 GLU.37 TYR.4
4p8bA TOT.306 # ILE.15 VAL.25 GLN.14 LYS.26 ASN.10 PRO.17 THR.17 PHE.11 ALA.38 HIS.3 GLY.27 ASP.15 LEU.23 ARG.13 TRP.10 GLU.19 TYR.8 SER.15
4mqbA TOT.197 # CYS.1 ILE.18 GLN.7 VAL.18 LYS.12 PRO.6 THR.9 PHE.6 ASN.9 HIS.4 GLY.14 ASP.12 LEU.15 ARG.14 ALA.11 GLU.22 TYR.10 SER.9
2gr8A TOT.77 # MET.2 ILE.5 VAL.5 GLN.6 LYS.4 PRO.2 THR.5 ALA.12 GLY.12 ASP.2 LEU.4 ARG.2 TRP.1 ASN.3 TYR.2 SER.10
2arpA TOT.105 # CYS.9 GLN.3 ILE.9 SER.9 VAL.4 LYS.7 PRO.5 ARG.3 THR.2 PHE.5 ASN.7 GLY.8 HIS.4 LEU.5 TRP.2 ASP.6 ALA.3 GLU.5 TYR.5 MET.4
4cqmB TOT.217 # CYS.3 GLN.8 ILE.11 SER.12 VAL.25 LYS.8 THR.8 PRO.3 HIS.12 PHE.8 ALA.23 GLY.28 ASP.8 GLU.7 LEU.23 ARG.11 ASN.10 TYR.3 MET.6
[truncated: 2,802,848 more chars]
