# Supplementary material for: Pi-Pi contacts are an overlooked protein feature relevant to phase separation
Source: eLife journal article supplement (doi:10.7554/elife.31486), 2018-02-09
Supplement: supp [file elife-31486-supp-v1.zip › elife_poa_e31486_Figure_5_source_data_1.xls]

## Sheet: 1A Training Set
Proteomic Sequences, Phase Separation Training Set
Internal Name	Uniprot Name	Uniprot ID# Trained On	Full Name(s)	Organism	Reference PMIDs	PScore
TAF15	RBP56_HUMAN	Q92804	TATA-binding protein-associated factor 2N;(geneTAF15)	Homo sapiens	24267890	18.48
ROA1	ROA1_HUMAN	P09651-2	hnRNP A1; Heterogeneous nuclear ribonucleoprotein A1	Homo sapiens	26412307; 26406374; 22579281	14.72
laf1	DDX3_CAEEL	D0PV95	ATP-dependent RNA helicase laf-1	Caenorhabditis elegans	26015579	12.89
FUS	FUS_HUMAN	H3BNZ4	RNA-binding protein FUS	Homo sapiens	26412307; 22579281	12.49
DDX3X	DDX3X_HUMAN	O00571	ATP-dependent RNA helicase DDX3X	Homo sapiens	27219701	7.9
DDX4	DDX4_HUMAN	Q9NQI0	Probable ATP-dependent RNA helicase DDX4	Homo sapiens	25747659; 27219701	6.77
eIF4H	IF4H_HUMAN	Q15056	eIF-4H; Eukaryotic translation initiation factor 4H	Homo sapiens	27219701	5.75
NSP1	NSP1_YEAST	P14907	Nucleoporin NSP1	Saccharomyces cerevisiae	17082456	5.67
EWS	EWS_HUMAN	F8WC90	RNA-binding protein EWS	Homo sapiens	24267890; 27219701	5.61
TIA1	TIA1_HUMAN	P31483	Nucleolysin TIA-1 isoform p40	Homo sapiens	26412307; 22579281	5.57
Elastin	ELN_HUMAN	P15502	Elastin;Tropoelastin	Homo sapiens	11738083; 24727034	5.53

## Sheet: 1B Testing Sets
			Phase Separation Test Set 1: Published Evidence of Phase Separation for Proteomic Sequences
Internal Name	Uniprot Name	Uniprot ID#	Full Name(s)	Organism	Evidence Category	Reference PMIDs	PScore
ROA2	ROA2_HUMAN	P22626-2	Heterogeneous nuclear ribonucleoproteins A2/B1	Homo sapiens	in vitro sufficient	22579281	14.06
fib1	FBRL_XENLA	P22232	rRNA 2'-O-methyltransferase fibrillarin	Xenopus laevis	in vitro sufficient	27212236	13.92
pgl-3	G5EBV6_CAEEL	G5EBV6	PGL3	Caenorhabditis elegans	in vitro sufficient	27594427	11.11
CIRBP	CIRBP_HUMAN	Q14011	Cold-inducible RNA-binding protein	Homo sapiens	in vitro sufficient	24267890	10.76
thermoNup98	D3KYQ3_TETTH	D3KYQ3	Macronuclear nucleoporin MacNup98A (thermophila)	Tetrahymena thermophila	in vitro sufficient	25562883	8.23
tbNup158	Q387F2_TRYB2	Q387F2	Nucleoporin, putative (t. brucei brucei)	Trypanosoma brucei brucei	in vitro sufficient	25562883	7.97
Silk	Q64K55_ARGTR	Q64K55	Aciniform spidroin 1 (silk wrapping protein)	Argiope trifasciata	in vitro sufficient	27272259	7.55
Nup100	NU100_YEAST	Q02629	Nucleoporin NUP100/NSP100	Saccharomyces cerevisiae	in vitro sufficient	25562883	7.28
Nup116	NU116_YEAST	Q02630	Nucleoporin NUP116/NSP116	Saccharomyces cerevisiae	in vitro sufficient	25562883	7.21
Nup98B	NU98B_ARATH	F4ID16	Nuclear pore complex protein NUP98B	Arabidopsis thaliana	in vitro sufficient	25562883	7
ddNup220	NUP98_DICDI	Q54EQ8	Nuclear pore complex protein Nup98-Nup96 (slime mold); Nup220?	Dictyostelium discoideum	in vitro sufficient	25562883	6.69
TDP43	TADBP_HUMAN	Q13148	TAR DNA-binding protein 43	Homo sapiens	in vitro sufficient	26406374	5.95
xNup214	Q9PVZ2_XENLA	Q9PVZ2	Nucleoporin CAN; gene: nup214	Xenopus laevis	in vitro sufficient	23202855	5.82
ceNup98	NUP98_CAEEL	G5EEH9	Nuclear pore complex protein Nup98-Nup96 (c. elegans)	Caenorhabditis elegans	in vitro sufficient	25562883	5.81
Nup98	NUP98_HUMAN	P52948	Nuclear pore complex protein Nup98-Nup96	Homo sapiens	in vitro sufficient	25562883	5.81
Nup153	NU153_HUMAN	P49790	Nuclear pore complex protein Nup153	Homo sapiens	in vitro sufficient	21961597	5.51
xNup58	Q5EAX5_XENLA	Q5EAX5	MGC84997 protein (Nup58 in paper, UID by BLAST)	Xenopus laevis	in vitro sufficient	23202855	5.25
m. BugZ	ZN207_MOUSE	Q9JMD0-3	BUB3-interacting and GLEBS motif-containing protein ZNF207; BugZ	Mus musculus	in vitro sufficient	26388440	5.1
bfNup98	C3XWA2_BRAFL	C3XWA2	Branchiostoma floridae Nup98	Branchiostoma floridae	in vitro sufficient	25562883	5.05
xNup98	J7I6Y1_XENTR	J7I6Y1	Nuclear pore complex protein Nup98-Nup96	Xenopus tropicalis	in vitro sufficient	23202855	4.91
dmNup98	Q9VCH5_DROME	Q9VCH5	Nucleoporin 98-96kD, isoform A (drosophila)	Drosophila melanogaster	in vitro sufficient	25562883	4.71
xNup153	K9ZRR1_XENTR	K9ZRR1	Nup153	Xenopus tropicalis	in vitro sufficient	23202855	4.48
RBM14	RBM14_HUMAN	Q96PK6	RNA-binding protein 14	Homo sapiens	in vitro sufficient	26283796	4.37
xNup54	K9ZTJ6_XENLA	K9ZTJ6	Nup54	Xenopus laevis	in vitro sufficient	23202855	4.3
x. BugZ	ZN207_XENLA	Q7ZXV8	BUB3-interacting and GLEBS motif-containing protein ZNF207; BugZ	Xenopus laevis	in vitro sufficient	26388440	4.13
xNup62	Q91349_XENLA	Q91349	Nup62	Xenopus laevis	in vitro sufficient	23202855	4.08
xPom121	Q5EWX9_XENLA	Q5EWX9	Nuclear pore protein pom121	Xenopus laevis	in vitro sufficient	23202855	3.56
WHI3	WHI3_YEAST	P34761	Protein WHI3	Saccharomyces cerevisiae	in vitro sufficient	26474065	3.38
x1CG1	NUPL2_XENLA	Q5XGN1	Nucleoporin-like protein 2	Xenopus laevis	in vitro sufficient	23202855	3.27
xNup50	Q6DEC7_XENLA	Q6DEC7	LOC503671 protein (Nup50 in paper, UID by BLAST)	Xenopus laevis	in vitro sufficient	23202855	2.52
meg-3	Q9TXM1_CAEEL	Q9TXM1	gene:meg-3	Caenorhabditis elegans	in vitro sufficient	27914198	2.46
eIF4G2	IF4F2_YEAST	P39936	Eukaryotic initiation factor 4F subunit p130; eIF4G2	Saccharomyces cerevisiae	in vitro sufficient	26412307	2.18
glh-1	GLH1_CAEEL	P34689	ATP-dependent RNA helicase glh-1	Caenorhabditis elegans	in cellulo	19460965	12.06
pgl-1	PGL1_CAEEL	Q9TZQ3	P granule abnormality protein 1; gene: pgl-1	Caenorhabditis elegans	in cellulo	19460965	9.44
DVL2	DVL2_MOUSE	Q60838	Segment polarity protein dishevelled homolog DVL-2	Mus musculus	in cellulo	16263762	4.18
GLI3	GLI3_HUMAN	P10071	Transcriptional activator GLI3	Homo sapiens	in cellulo	27220849	3.27
SC35	SRSF2_HUMAN	Q01130	Serine/arginine-rich splicing factor 2; SC-35	Homo sapiens	in cellulo	27220849	3.05
Coilin	COIL_HUMAN	P38432	Coilin; p80-coilin	Homo sapiens	in cellulo	12679382	2.56
SQSTM	SQSTM_HUMAN	Q13501	Sequestosome-1	Homo sapiens	in cellulo	22017874	2.51
DYRK3	DYRK3_HUMAN	O43781	Dual specificity tyrosine-phosphorylation-regulated kinase 3	Homo sapiens	in cellulo	23415227	2.35
AXIN1	AXIN1_HUMAN	O15169	Axin-1	Homo sapiens	in cellulo	16263762	2.15
SMN	SMN_HUMAN	Q16637	Survival motor neuron protein	Homo sapiens	in cellulo	12679382	2.12
pie-1	PIE1_CAEEL	Q94131	Pharynx and intestine in excess protein 1; gene: pie-1	Caenorhabditis elegans	in cellulo	19460965	1.89
MIP6	MIP6_YEAST	P38760	RNA-binding protein MIP6	Saccharomyces cerevisiae	in cellulo	27320918	0.74
RBM3	RBM3_HUMAN	P98179	RNA-binding protein 3	Homo sapiens	in vitro insufficient	22579281	10.66
ERF3	ERF3_YEAST	P05453	(gene:Sup35);Eukaryotic peptide chain release factor GTP-binding subunit	Saccharomyces cerevisiae	in vitro insufficient	22579281	6.21
CPEB2	CPEB2_HUMAN	Q7Z5Q1	Cytoplasmic polyadenylation element-binding protein 2	Homo sapiens	in vitro insufficient	22579281	5.01
WASL	WASL_RAT	O08816	Neural Wiskott-Aldrich syndrome protein; N-WASP	Rattus norvegicus	in vitro insufficient	22398450	4.71
FMR1	FMR1_HUMAN	Q06787	Synaptic functional regulator FMR1	Homo sapiens	in vitro insufficient	22579281	4.7
LSM4	LSM4_YEAST	P40070	U6 snRNA-associated Sm-like protein LSm4	Saccharomyces cerevisiae	in vitro insufficient	26412307	4.65
SynGap	J3QQ18_MOUSE	J3QQ18	Ras/Rap GTPase-activating protein SynGAP	Mus musculus	in vitro insufficient	27565345	4.36
SOS1	SOS1_HUMAN	Q07889	Son of sevenless homolog 1	Homo sapiens	in vitro insufficient	27056844	3.17
PUB1	PUB1_YEAST	P32588	Nuclear and cytoplasmic polyadenylated RNA-binding protein PUB1	Saccharomyces cerevisiae	in vitro insufficient	26412307	2.94
LAT	LAT_HUMAN	O43561-2	Linker for activation of T-cells family member 1 (gene: LAT)	Homo sapiens	in vitro insufficient	27056844	2.71
Nephrin	NPHN_HUMAN	O60500	Nephrin	Homo sapiens	in vitro insufficient	25321392	1.73
dcp2	DCP2_SCHPO	O13828	mRNA decapping complex subunit 2; gene: dcp2	Schizosaccharomyces pombe	in vitro insufficient	24862735	1.52
pdc1	YE38_SCHPO	O13892	Uncharacterized protein C20G4.08; (Pdc1 in paper, UID by BLAST)	Schizosaccharomyces pombe	in vitro insufficient	24862735	1.49
Disks4	DLG4_HUMAN	P78352	Disks large homolog 4	Homo sapiens	in vitro insufficient	27565345	1.28
GRB2	GRB2_HUMAN	P62993	Growth factor receptor-bound protein 2 (gene GRB2)	Homo sapiens	in vitro insufficient	27056844	0.89
NCK1	NCK1_HUMAN	P16333	Cytoplasmic protein NCK1	Homo sapiens	in vitro insufficient	22398450	0.8
edc3	EDC3_SCHPO	O94752	Enhancer of mRNA-decapping protein 3; gene edc3	Schizosaccharomyces pombe	in vitro insufficient	24862735	0.58
npm1	NPM_XENLA	P07222	Nucleophosmin	Xenopus laevis	in vitro insufficient	27212236; 26836305	-0.09

## Sheet: 1C Designed Protein Test Set
Phase Separation Test Set 2: Phase separating proteins designed by the Chilkoti lab
Nature Materials 2015*
PScore	Critical Solution Temperature Type#	Construct Name	Sequence Definition
16.58	UCST	(RGDSPHG)64	MSKGP-(RGDSPHG)64-HHHHHHYG
13	UCST	(GRGESPYG)20	MSKGP-(GRGESPYG)20-HHHHHHYG
11.22	UCST	(GRGDSPFG)20	MSKGP-(GRGDSPFG)20-HHHHHHYG
10.82	UCST	(RGDSYPG)20	MSKGP-(RGDSYPG)20-HHHHHHYG
9.7	UCST	(GRPSDSYG)20	MSKGP-(GRPSDSYG)20-HHHHHHYG
9.36	UCST	(RGDSPYG)24	MSKGP-(RGDSPYG)24-HHHHHHYG
9.27	UCST	(QYPSDGRG)24	MSKGP-(QYPSDGRG)24-HHHHHHYG
8.75	UCST	(GRASDSYG)20	MSKGP-(GRASDSYG)20-HHHHHHYG
8.06	LCST	(VPGAGVPGGG)20	MSKGP-(VPGAGVPGGG)20-HHHHHHYG
7.32	UCST	(VPHSRNGGNSGGRGDSPYG)24	MSKGP-(VPHSRNGGNSGGRGDSPYG)24-HHHHHHYG
6.87	UCST	(RGDSPYQG)24	MSKGP-(RGDSPYQG)24-HHHHHHYG
6.19	UCST	(GRDGSPYG)20	MSKGP-(GRDGSPYG)20-HHHHHHYG
6.11	UCST	(GRGDSPYG)20	MSKGP-(GRGDSPYG)20-HHHHHHYG
5.74	UCST	(GRGNSPYG)40	MSKGP-(GRGNSPYG)40-HHHHHHYG
4.75	LCST	(APGVG)45	MSKGP-(APGVG)45-HHHHHHYG
4.63	UCST	(DPGYIGSRG)16	MSKGP-(DPGYIGSRG)16-HHHHHHYG
4.55	UCST	(RGDAPYQG)28	MSKGP-(RGDAPYQG)28-HHHHHHYG
4.39	UCST	(VRPDG)40	MSKGP-(VRPDG)40-HHHHHHYG
4.36	UCST	(VRPDG)50	MSKGP-(VRPDG)50-HHHHHHYG
4.35	UCST	(VRPDG)30	MSKGP-(VRPDG)30-HHHHHHYG
3.92	LCST	(VHPGVG)25	MSKGP-(VHPGVG)25-HHHHHHYG
3.66	LCST	(VPGVG)30	MSKGP-(VPGVG)30-HHHHHHYG
3.29	LCST	(TVPGAG)55	MSKGP-(TVPGAG)55-HHHHHHYG
3.09	LCST	(VPHVG)40	MSKGP-(VPHVG)40-HHHHHHYG
2.45	LCST	(VPSALYGVG)21	MSKGP-(VPSALYGVG)21-HHHHHHYG
2.3	LCST	(VPTGVG)40	MSKGP-(VPTGVG)40-HHHHHHYG
2.2	LCST	(APVGVG)35	MSKGP-(APVGVG)35-HHHHHHYG
1.98	LCST	(APVGLG)40	MSKGP-(APVGLG)40-HHHHHHYG
1.91	LCST	(TVPGVG)65	MSKGP-(TVPGVG)65-HHHHHHYG
1.79	LCST	(VAPDG)30	MSKGP-(VAPDG)30-HHHHHHYG
1.78	LCST	(AVPGVG)25	MSKGP-(AVPGVG)25-HHHHHHYG
1.49	LCST	(GVPGAV)30	MSKGP-(GVPGAV)30-HHHHHHYG
1.14	LCST	(VPAGVG)25	MSKGP-(VPAGVG)25-HHHHHHYG
0.92	LCST	(GVPGVA)50	MSKGP-(GVPGVA)50-HHHHHHYG
0.55	LCST	(VGPVG)30	MSKGP-(VGPVG)30-HHHHHHYG
0.43	LCST	(VPGVA)35	MSKGP-(VPGVA)35-HHHHHHYG
0.31	LCST	(VPAVG)45	MSKGP-(VPAVG)45-HHHHHHYG
-0.12	LCST	(TPVAVG)30	MSKGP-(TPVAVG)30-HHHHHHYG
-1.03	LCST	(VTPAVG)25	MSKGP-(VTPAVG)25-HHHHHHYG
-1.56	LCST	(VAPVG)35	MSKGP-(VAPVG)35-HHHHHHYG
Nature Chemistry 2017**
PScore	Critical Solution Temperature Type#	Construct Name	Sequence Definition
11.37	LCST	D	GCGWPG-(VPGVG)80-(VPGSG)80-PGGS
5.57	LCST	E4	MSKGPG-(VPGAG)80-Y
4.18	LCST	E3	(VPGVGVPGAGVPGVGVPGVGVPGVGVPGVGVPGAGVPGVGVPGVGVPGVGGKG)8-Y
3.75	LCST	E5	MSKGPG-(VPGVG)40-Y
3.73	LCST	E2	MSKGPG-(VPGVGVPGAG)40-Y
3.72	LCST	E1	MSKGPG-(VPGVG)160-Y
Biomacromolecules 2017***
PScore	Critical Solution Temperature Type#	Construct Name	Sequence Definition
11.37	LCST	ELP-Scomp	G-(SGVPG)120-Y
11.37	LCST	ELP-SVTVSV	G-(VGVPG)30-(SGVPG)60-(VGVPG)30-Y
11.37	LCST	ELP-SVDSV	G-(SGVPG)60-(VGVPG)60-Y
11.15	LCST	ELP-SVGH	G-(SGVPG)40-(VGVPG)5-(SGVPG)10-(VGVPG)5-(SGVPG)5-(VGVPG)10-(SGVPG)5-(VGVPG)40-Y
10.93	LCST	ELP-SVGI	G-(SGVPG)35-(VGVPG)5-(SGVPG)10-(VGVPG)10-(SGVPG)10-(VGVPG)10-(SGVPG)5-(VGVPG)35-Y
10.79	LCST	ELP-SVB30	G-[(SGVPG)30-(VGVPG)30]2-Y
10.72	LCST	ELP-SVTSVS	G-(SGVPG)30-(VGVPG)60-(SGVPG)30-Y
10.61	LCST	ELP-SVGL	G-(SGVPG)30-(VGVPG)5-(SGVPG)10-(VGVPG)5-(SGVPG)5-(VGVPG)5-(SGVPG)5-(VGVPG)5-(SGVPG)5-(VGVPG)10-(SGVPG)5-(VGVPG)30-Y
9.33	LCST	ELP-SVB20	G-[(SGVPG)20-(VGVPG)20]3-Y
7.07	LCST	ELP-SVB10	G-[(SGVPG)10-(VGVPG)10]6-Y
6.03	LCST	ELP-SVB5	G-[(SGVPG)5-(VGVPG)5]12-Y
4.87	LCST	ELP-SVB1	G-[(SGVPG)1-(VGVPG)1]60-Y
3.72	LCST	ELP-Vcomp	G-(VGVPG)120-Y
*Quiroz FG, Chilkoti A: Sequence heuristics to encode phase behaviour in intrinsically disordered protein polymers. Nat Mater 2015, 14:1164-1171.
**Simon JR, Carroll NJ, Rubinstein M, Chilkoti A, Lopez GP: Programming molecular self-assembly of intrinsically disordered proteins containing sequences of low complexity. Nature Chemistry 2017.
***MacEwan SR, Weitzhandler I, Hoffmann I, Genzer J, Gradzielski M, Chilkoti A: Phase Behavior and Self-Assembly of Perfectly Sequence-Defined and Monodisperse Multiblock Copolypeptides. Biomacromolecules 2017, 18:599-609.
# UCSF = Upper critical solution temperature, LCSF = Lower critical solution temperature
