# Supplementary material for: Pi-Pi contacts are an overlooked protein feature relevant to phase separation
Source: eLife journal article supplement (doi:10.7554/elife.31486), 2018-02-09
Supplement: supp [file elife-31486-supp-v1.zip › elife_poa_e31486_Figure_5_source_data_2.xls]

## Sheet: HUMAN
UID	Uniprot Name	PScore	Protein Name
P15085	CBPA1_HUMAN	-0.23	Carboxypeptidase A1
Q9UKX7	NUP50_HUMAN	3	Nuclear pore complex protein Nup50
Q8NEL0	CCD54_HUMAN	-0.17	Coiled-coil domain-containing protein 54
Q13416	ORC2_HUMAN	0	Origin recognition complex subunit 2
Q96A28	SLAF9_HUMAN	2.25	SLAM family member 9
P16473	TSHR_HUMAN	0.2	Thyrotropin receptor
Q9UJ37	SIA7B_HUMAN	1.65	Alpha-N-acetylgalactosaminide alpha-2,6-sialylt
P25791	RBTN2_HUMAN	-0.18	Rhombotin-2
Q3B8N5	PROX2_HUMAN	2.52	Prospero homeobox protein 2
Q5VTB9	RN220_HUMAN	2.06	E3 ubiquitin-protein ligase RNF220
Q96MI9	CBPC4_HUMAN	0.72	Cytosolic carboxypeptidase 4
Q9P2J8	ZN624_HUMAN	0.3	Zinc finger protein 624
O00443	P3C2A_HUMAN	2.28	Phosphatidylinositol 4-phosphate 3-kinase C2 do
Q86SP6	GP149_HUMAN	1.06	Probable G-protein coupled receptor 149
Q9BYC2	SCOT2_HUMAN	1.15	Succinyl-CoA:3-ketoacid coenzyme A transferase
G3V3Q6	G3V3Q6_HUMAN	1.7	Uncharacterized protein (Fragment)
Q4G1C9	GRPL2_HUMAN	0.99	GLIPR1-like protein 2
Q9UQQ2	SH2B3_HUMAN	0.79	SH2B adapter protein 3
P14923	PLAK_HUMAN	1.71	Junction plakoglobin
Q15477	SKIV2_HUMAN	0.82	Helicase SKI2W
Q96PJ5	FCRL4_HUMAN	1.2	Fc receptor-like protein 4
Q9ULL8	SHRM4_HUMAN	3.78	Protein Shroom4
Q9H665	IGFR1_HUMAN	3.79	IGF-like family receptor 1
Q9NRZ5	PLCD_HUMAN	-0.7	1-acyl-sn-glycerol-3-phosphate acyltransferase d
Q8TEV9	SMCR8_HUMAN	1.27	Smith-Magenis syndrome chromosomal region candi
Q8IYB3	SRRM1_HUMAN	4.74	Serine/arginine repetitive matrix protein 1
Q9BUB7	TMM70_HUMAN	1.45	Transmembrane protein 70, mitochondrial
O00187	MASP2_HUMAN	2.86	Mannan-binding lectin serine protease 2
Q9BR26	OCSTP_HUMAN	0.99	Osteoclast stimulatory transmembrane protein
Q12797	ASPH_HUMAN	1.67	Aspartyl/asparaginyl beta-hydroxylase
Q9UJU5	FOXD3_HUMAN	3.06	Forkhead box protein D3
Q8N907	DAND5_HUMAN	0.7	DAN domain family member 5
P50591	TNF10_HUMAN	-0.48	Tumor necrosis factor ligand superfamily member
P04818	TYSY_HUMAN	0.45	Thymidylate synthase
Q11130	FUT7_HUMAN	1.03	Alpha-(1,3)-fucosyltransferase 7
O75388	GPR32_HUMAN	0.26	Probable G-protein coupled receptor 32
Q96KK3	KCNS1_HUMAN	1.1	Potassium voltage-gated channel subfamily S mem
Q10469	MGAT2_HUMAN	0.03	Alpha-1,6-mannosyl-glycoprotein 2-beta-N-acetyl
Q3SYA9	P12L1_HUMAN	2.16	Putative POM121-like protein 1
Q9H2C8	O51V1_HUMAN	-1.04	Olfactory receptor 51V1
Q7LGA3	HS2ST_HUMAN	-0.17	Heparan sulfate 2-O-sulfotransferase 1
A0A0U1RQS6	A0A0U1RQS6_HUMAN	0.09	Uncharacterized protein
P39210	MPV17_HUMAN	-1.29	Protein Mpv17
O95995	GAS8_HUMAN	-1.2	Growth arrest-specific protein 8
Q9HCK1	ZDBF2_HUMAN	0.9	DBF4-type zinc finger-containing protein 2
Q9P0V8	SLAF8_HUMAN	-0.64	SLAM family member 8
Q9H4D5	NXF3_HUMAN	2.61	Nuclear RNA export factor 3
Q9BRP1	PDD2L_HUMAN	0.72	Programmed cell death protein 2-like
Q8NH95	O13C6_HUMAN	-0.96	Putative olfactory receptor 13C6
A0MZ66	SHOT1_HUMAN	1.52	Shootin-1
Q9HBG4	VPP4_HUMAN	0.93	V-type proton ATPase 116 kDa subunit a isoform 4
Q9H4L7	SMRCD_HUMAN	1.39	SWI/SNF-related matrix-associated actin-depende
H7C1Q1	H7C1Q1_HUMAN	1.18	Uncharacterized protein (Fragment)
Q96G03	PGM2_HUMAN	0.74	Phosphoglucomutase-2
A2A3N6	PIPSL_HUMAN	0.79	Putative PIP5K1A and PSMD4-like protein
Q9NQ79	CRAC1_HUMAN	2.04	Cartilage acidic protein 1
Q8NDH3	PEPL1_HUMAN	0.36	Probable aminopeptidase NPEPL1
B2RN74	O11HC_HUMAN	-0.62	Olfactory receptor 11H12
Q9Y587	AP4S1_HUMAN	-1.94	AP-4 complex subunit sigma-1
Q96S59	RANB9_HUMAN	4.2	Ran-binding protein 9
Q8N9N5	BANP_HUMAN	0.11	Protein BANP
Q9H903	MTD2L_HUMAN	-0.15	Probable bifunctional methylenetetrahydrofolate
Q9Y5P8	P2R3B_HUMAN	2	Serine/threonine-protein phosphatase 2A regulat
Q9H0S4	DDX47_HUMAN	-0.15	Probable ATP-dependent RNA helicase DDX47
A4D2P6	GRD2I_HUMAN	3.3	Delphilin
Q9H9Y2	RPF1_HUMAN	0.48	Ribosome production factor 1
P32119	PRDX2_HUMAN	-0.32	Peroxiredoxin-2
Q99707	METH_HUMAN	0.89	Methionine synthase
Q8IU54	IFNL1_HUMAN	-0.9	Interferon lambda-1
P55809	SCOT1_HUMAN	1.89	Succinyl-CoA:3-ketoacid coenzyme A transferase
D6RGH6	MCIN_HUMAN	2.1	Multicilin
Q8WWU7	ITLN2_HUMAN	1.96	Intelectin-2
Q9P2R3	ANFY1_HUMAN	0.61	Rabankyrin-5
Q9ULT6	ZNRF3_HUMAN	3.76	E3 ubiquitin-protein ligase ZNRF3
Q92966	SNPC3_HUMAN	2.51	snRNA-activating protein complex subunit 3
Q53S48	Q53S48_HUMAN	1.77	Protein STON1-GTF2A1L
A8MYP8	ODF3B_HUMAN	2.61	Outer dense fiber protein 3B
A4FU01	MTMRB_HUMAN	0.55	Myotubularin-related protein 11
Q04844	ACHE_HUMAN	-0.13	Acetylcholine receptor subunit epsilon
O75678	RFPL2_HUMAN	0.66	Ret finger protein-like 2
F5H6K3	F5H6K3_HUMAN	-0.34	Uncharacterized protein
Q9UL49	TCFL5_HUMAN	1.58	Transcription factor-like 5 protein
P63132	PO113_HUMAN	-0.28	Endogenous retrovirus group K member 113 Pol pr
Q99677	LPAR4_HUMAN	0.33	Lysophosphatidic acid receptor 4
O95816	BAG2_HUMAN	-1.8	BAG family molecular chaperone regulator 2
O95972	BMP15_HUMAN	1.04	Bone morphogenetic protein 15
Q9BXC1	GP174_HUMAN	0.07	Probable G-protein coupled receptor 174
P40189	IL6RB_HUMAN	1.82	Interleukin-6 receptor subunit beta
Q15573	TAF1A_HUMAN	-0.15	TATA box-binding protein-associated factor RNA
Q8TB36	GDAP1_HUMAN	0.4	Ganglioside-induced differentiation-associated
Q86UN6	AKA28_HUMAN	-1.16	A-kinase anchor protein 14
Q9H0H3	KLH25_HUMAN	1.19	Kelch-like protein 25
O14735	CDIPT_HUMAN	-0.26	CDP-diacylglycerol--inositol 3-phosphatidyltran
Q9ULS6	KCNS2_HUMAN	0.25	Potassium voltage-gated channel subfamily S mem
P50453	SPB9_HUMAN	0.89	Serpin B9
P46926	GNPI1_HUMAN	-0.42	Glucosamine-6-phosphate isomerase 1
P47813	IF1AX_HUMAN	0.18	Eukaryotic translation initiation factor 1A, X-
Q6PI97	CK088_HUMAN	2.26	UPF0722 protein C11orf88
Q96J65	MRP9_HUMAN	0.24	Multidrug resistance-associated protein 9
Q99575	POP1_HUMAN	2.47	Ribonucleases P/MRP protein subunit POP1
Q8IYS8	BD1L2_HUMAN	-0.58	Biorientation of chromosomes in cell division p
Q9UBN6	TR10D_HUMAN	1.43	Tumor necrosis factor receptor superfamily memb
Q9NW38	FANCL_HUMAN	0.46	E3 ubiquitin-protein ligase FANCL
P53420	CO4A4_HUMAN	7.13	Collagen alpha-4(IV) chain
A6NI72	NCF1B_HUMAN	-0.2	Putative neutrophil cytosol factor 1B
Q14914	PTGR1_HUMAN	1.06	Prostaglandin reductase 1
O60244	MED14_HUMAN	4.16	Mediator of RNA polymerase II transcription sub
Q9P2K1	C2D2A_HUMAN	1.92	Coiled-coil and C2 domain-containing protein 2A
Q9H7M6	ZSWM4_HUMAN	0.74	Zinc finger SWIM domain-containing protein 4
Q8NH49	OR4X1_HUMAN	-0.86	Olfactory receptor 4X1
Q93008	USP9X_HUMAN	2.81	Probable ubiquitin carboxyl-terminal hydrolase
Q16698	DECR_HUMAN	0.56	2,4-dienoyl-CoA reductase, mitochondrial
P51956	NEK3_HUMAN	-0.18	Serine/threonine-protein kinase Nek3
A6NFQ2	TCAF2_HUMAN	1.4	TRPM8 channel-associated factor 2
O15403	MOT7_HUMAN	-0.36	Monocarboxylate transporter 7
Q15223	NECT1_HUMAN	1.99	Nectin-1
Q86X27	RGPS2_HUMAN	0.6	Ras-specific guanine nucleotide-releasing facto
A2RUH7	MBPHL_HUMAN	-0.05	Myosin-binding protein H-like
Q8N2M4	TM86A_HUMAN	-1.23	Lysoplasmalogenase-like protein TMEM86A
Q8IV01	SYT12_HUMAN	0.08	Synaptotagmin-12
Q6JEL2	KLH10_HUMAN	1.52	Kelch-like protein 10
Q9H832	UBE2Z_HUMAN	0.98	Ubiquitin-conjugating enzyme E2 Z
Q8N6N3	CA052_HUMAN	0.45	UPF0690 protein C1orf52
Q9Y3B6	EMC9_HUMAN	-1.56	ER membrane protein complex subunit 9
P48643	TCPE_HUMAN	-0.05	T-complex protein 1 subunit epsilon
Q7Z7K2	ZN467_HUMAN	4.07	Zinc finger protein 467
Q5J8X5	M4A13_HUMAN	-0.56	Membrane-spanning 4-domains subfamily A member
Q9BSI4	TINF2_HUMAN	0.21	TERF1-interacting nuclear factor 2
Q6NY19	KANK3_HUMAN	4.05	KN motif and ankyrin repeat domain-containing p
Q53RE8	ANR39_HUMAN	-0.63	Ankyrin repeat domain-containing protein 39
Q5H8A3	NMS_HUMAN	-1.05	Neuromedin-S
O14526	FCHO1_HUMAN	3.42	F-BAR domain only protein 1
P28328	PEX2_HUMAN	1.99	Peroxisome biogenesis factor 2
Q6VY07	PACS1_HUMAN	2.18	Phosphofurin acidic cluster sorting protein 1
Q9H8X2	IPPK_HUMAN	0.04	Inositol-pentakisphosphate 2-kinase
Q16762	THTR_HUMAN	1.3	Thiosulfate sulfurtransferase
P56856	CLD18_HUMAN	1.14	Claudin-18
Q9H9Y4	GPN2_HUMAN	-0.84	GPN-loop GTPase 2
Q9H4Z2	ZN335_HUMAN	2.23	Zinc finger protein 335
P46091	GPR1_HUMAN	-1.95	G-protein coupled receptor 1
P10323	ACRO_HUMAN	2.86	Acrosin
Q6ZN19	ZN841_HUMAN	1.14	Zinc finger protein 841
I3L1I5	YS060_HUMAN	1.44	Putative uncharacterized protein LOC100996504
Q92674	CENPI_HUMAN	0.28	Centromere protein I
Q8IYD1	ERF3B_HUMAN	1.92	Eukaryotic peptide chain release factor GTP-bin
P00352	AL1A1_HUMAN	0.65	Retinal dehydrogenase 1
P51957	NEK4_HUMAN	0.81	Serine/threonine-protein kinase Nek4
Q14154	DELE_HUMAN	1.92	Death ligand signal enhancer
Q16385	SSX2_HUMAN	0.76	Protein SSX2
Q9NX74	DUS2L_HUMAN	0.75	tRNA-dihydrouridine(20) synthase [NAD(P)+]-like
Q9H8M5	CNNM2_HUMAN	1.51	Metal transporter CNNM2
O94760	DDAH1_HUMAN	-0.35	N(G),N(G)-dimethylarginine dimethylaminohydrola
Q5JWF8	ACL10_HUMAN	0.44	Actin-like protein 10
Q8N412	STPG2_HUMAN	0.12	Sperm-tail PG-rich repeat-containing protein 2
Q15428	SF3A2_HUMAN	3.24	Splicing factor 3A subunit 2
Q8WTS6	SETD7_HUMAN	0.1	Histone-lysine N-methyltransferase SETD7
Q96BI1	S22AI_HUMAN	-0.15	Solute carrier family 22 member 18
Q9BYR4	KRA43_HUMAN	4.73	Keratin-associated protein 4-3
A8MWA4	Z705E_HUMAN	-0.25	Putative zinc finger protein 705E
Q9Y577	TRI17_HUMAN	1.87	E3 ubiquitin-protein ligase TRIM17
Q4LDE5	SVEP1_HUMAN	3.92	Sushi, von Willebrand factor type A, EGF and pe
P25101	EDNRA_HUMAN	0.88	Endothelin-1 receptor
Q9UBN1	CCG4_HUMAN	1.33	Voltage-dependent calcium channel gamma-4 subuni
Q8NB78	KDM1B_HUMAN	1.75	Lysine-specific histone demethylase 1B
Q8N1E2	LYG1_HUMAN	-0.35	Lysozyme g-like protein 1
Q96KQ7	EHMT2_HUMAN	4.21	Histone-lysine N-methyltransferase EHMT2
P16298	PP2BB_HUMAN	1.42	Serine/threonine-protein phosphatase 2B catalyt
Q15628	TRADD_HUMAN	0.96	Tumor necrosis factor receptor type 1-associate
Q9Y653	AGRG1_HUMAN	0.83	Adhesion G-protein coupled receptor G1
Q9UFB7	ZBT47_HUMAN	1.83	Zinc finger and BTB domain-containing protein 4
Q70Z35	PREX2_HUMAN	1.45	Phosphatidylinositol 3,4,5-trisphosphate-depend
Q8IUC1	KR111_HUMAN	1.48	Keratin-associated protein 11-1
Q99519	NEUR1_HUMAN	2.14	Sialidase-1
P09629	HXB7_HUMAN	4.94	Homeobox protein Hox-B7
P53814	SMTN_HUMAN	3.57	Smoothelin
P11465	PSG2_HUMAN	0.94	Pregnancy-specific beta-1-glycoprotein 2
A8MTL0	IQCF5_HUMAN	-2.12	IQ domain-containing protein F5
O75618	DEDD_HUMAN	1.02	Death effector domain-containing protein
Q15437	SC23B_HUMAN	1.34	Protein transport protein Sec23B
Q05586	NMDZ1_HUMAN	0.8	Glutamate receptor ionotropic, NMDA 1
Q8WU08	ST32A_HUMAN	0.08	Serine/threonine-protein kinase 32A
Q5VUY2	ADCL4_HUMAN	0.39	Arylacetamide deacetylase-like 4
Q8TCY9	URGCP_HUMAN	0.46	Up-regulator of cell proliferation
P05187	PPB1_HUMAN	0.54	Alkaline phosphatase, placental type
Q8NFN8	GP156_HUMAN	2.89	Probable G-protein coupled receptor 156
Q5SRI9	MANEA_HUMAN	1.14	Glycoprotein endo-alpha-1,2-mannosidase
Q3MIT2	PUS10_HUMAN	1.13	Putative tRNA pseudouridine synthase Pus10
Q92870	APBB2_HUMAN	2.93	Amyloid beta A4 precursor protein-binding famil
Q9UHB6	LIMA1_HUMAN	0.49	LIM domain and actin-binding protein 1
Q96LL4	CH048_HUMAN	-0.08	Uncharacterized protein C8orf48
B2RC85	R10B2_HUMAN	2.73	Radial spoke head 10 homolog B2
O76050	NEUL1_HUMAN	1.69	E3 ubiquitin-protein ligase NEURL1
P33316	DUT_HUMAN	1.41	Deoxyuridine 5'-triphosphate nucleotidohydrolase,
Q9HCE3	ZN532_HUMAN	1.67	Zinc finger protein 532
Q9NRM0	GTR9_HUMAN	0.35	Solute carrier family 2, facilitated glucose tra
O60656	UD19_HUMAN	0.66	UDP-glucuronosyltransferase 1-9
A2AJT9	CX023_HUMAN	2.3	Uncharacterized protein CXorf23
A6NJL1	ZSA5B_HUMAN	2.19	Zinc finger and SCAN domain-containing protein
A8MWA6	F90AM_HUMAN	2.27	Putative protein FAM90A22P
O75871	CEAM4_HUMAN	0.45	Carcinoembryonic antigen-related cell adhesion
Q9H3F6	BACD3_HUMAN	1.25	BTB/POZ domain-containing adapter for CUL3-medi
Q14839	CHD4_HUMAN	1.73	Chromodomain-helicase-DNA-binding protein 4
Q8NGR4	OR5C1_HUMAN	-0.57	Olfactory receptor 5C1
O95096	NKX22_HUMAN	2.25	Homeobox protein Nkx-2.2
P63316	TNNC1_HUMAN	-1.7	Troponin C, slow skeletal and cardiac muscles
Q96K21	ANCHR_HUMAN	3.32	Abscission/NoCut checkpoint regulator
Q13813	SPTN1_HUMAN	0.22	Spectrin alpha chain, non-erythrocytic 1
Q03933	HSF2_HUMAN	-0.23	Heat shock factor protein 2
Q9P278	FNIP2_HUMAN	1.79	Folliculin-interacting protein 2
Q8IVN8	SBSPO_HUMAN	4.41	Somatomedin-B and thrombospondin type-1 domain-
Q13508	NAR3_HUMAN	0.97	Ecto-ADP-ribosyltransferase 3
Q7Z7H3	CATIP_HUMAN	0.19	Ciliogenesis-associated TTC17-interacting prote
A8MPX8	PP2D1_HUMAN	0.28	Protein phosphatase 2C-like domain-containing p
Q99608	NECD_HUMAN	1.74	Necdin
Q9BRB3	PIGQ_HUMAN	1.26	Phosphatidylinositol N-acetylglucosaminyltransfe
Q8WZ84	OR8D1_HUMAN	-0.72	Olfactory receptor 8D1
P20042	IF2B_HUMAN	-0.65	Eukaryotic translation initiation factor 2 subun
O00213	APBB1_HUMAN	4.51	Amyloid beta A4 precursor protein-binding famil
Q76N89	HECW1_HUMAN	6.63	E3 ubiquitin-protein ligase HECW1
Q8N4C7	STX19_HUMAN	-1.93	Syntaxin-19
Q92748	THRSP_HUMAN	-0.78	Thyroid hormone-inducible hepatic protein
O15031	PLXB2_HUMAN	1.8	Plexin-B2
Q92585	MAML1_HUMAN	4.18	Mastermind-like protein 1
Q17RP2	TIGD6_HUMAN	-0.27	Tigger transposable element-derived protein 6
Q8IUF1	CBWD2_HUMAN	-0.73	COBW domain-containing protein 2
A6NGB0	T191C_HUMAN	1.76	Transmembrane protein 191C
Q9P232	CNTN3_HUMAN	1.24	Contactin-3
Q9UIY3	RWD2A_HUMAN	-0.54	RWD domain-containing protein 2A
P05543	THBG_HUMAN	-0.62	Thyroxine-binding globulin
Q15773	MLF2_HUMAN	1.37	Myeloid leukemia factor 2
Q06520	ST2A1_HUMAN	-0.33	Bile salt sulfotransferase
Q6UY18	LIGO4_HUMAN	0.97	Leucine-rich repeat and immunoglobulin-like dom
P42336	PK3CA_HUMAN	0.61	Phosphatidylinositol 4,5-bisphosphate 3-kinase
O94956	SO2B1_HUMAN	1.47	Solute carrier organic anion transporter family
Q8IYA7	MKX_HUMAN	1.72	Homeobox protein Mohawk
Q03060	CREM_HUMAN	0.92	cAMP-responsive element modulator
Q9NXL9	MCM9_HUMAN	2.33	DNA helicase MCM9
Q9BYG0	B3GN5_HUMAN	-0.17	Lactosylceramide 1,3-N-acetyl-beta-D-glucosamin
Q6QNY0	BL1S3_HUMAN	1.48	Biogenesis of lysosome-related organelles compl
Q96EE4	CC126_HUMAN	-1.07	Coiled-coil domain-containing protein 126
Q8IUX4	ABC3F_HUMAN	0.4	DNA dC->dU-editing enzyme APOBEC-3F
P46013	KI67_HUMAN	1.6	Proliferation marker protein Ki-67
Q9BWT1	CDCA7_HUMAN	2.21	Cell division cycle-associated protein 7
Q9Y5P0	O51B4_HUMAN	0.19	Olfactory receptor 51B4
Q9NRA2	S17A5_HUMAN	0.31	Sialin
Q9Y5Y0	FLVC1_HUMAN	0.84	Feline leukemia virus subgroup C receptor-relat
Q6NVV3	NIPA3_HUMAN	-0.81	Magnesium transporter NIPA3
Q9H211	CDT1_HUMAN	1.72	DNA replication factor Cdt1
Q9Y487	VPP2_HUMAN	0.49	V-type proton ATPase 116 kDa subunit a isoform 2
O75496	GEMI_HUMAN	1.1	Geminin
P02042	HBD_HUMAN	-0.5	Hemoglobin subunit delta
Q3B8N2	LEG9B_HUMAN	2.67	Galectin-9B
P11277	SPTB1_HUMAN	0.27	Spectrin beta chain, erythrocytic
O76015	KRT38_HUMAN	1.59	Keratin, type I cuticular Ha8
A0AV96	RBM47_HUMAN	3.26	RNA-binding protein 47
P60370	KR105_HUMAN	2.76	Keratin-associated protein 10-5
Q9NSE2	CISH_HUMAN	0.52	Cytokine-inducible SH2-containing protein
Q04724	TLE1_HUMAN	1.46	Transducin-like enhancer protein 1
Q75VX8	GARE2_HUMAN	3.84	GRB2-associated and regulator of MAPK protein 2
Q9BWF3	RBM4_HUMAN	1.15	RNA-binding protein 4
P43358	MAGA4_HUMAN	0.6	Melanoma-associated antigen 4
Q6L8G8	KRA57_HUMAN	10.71	Keratin-associated protein 5-7
Q96CM3	RUSD4_HUMAN	0.26	RNA pseudouridylate synthase domain-containing
Q9NPB6	PAR6A_HUMAN	2.75	Partitioning defective 6 homolog alpha
Q96MA1	DMRTB_HUMAN	3.18	Doublesex- and mab-3-related transcription fact
P33240	CSTF2_HUMAN	3.54	Cleavage stimulation factor subunit 2
Q8WY21	SORC1_HUMAN	2.74	VPS10 domain-containing receptor SorCS1
P56270	MAZ_HUMAN	1.79	Myc-associated zinc finger protein
Q96DB9	FXYD5_HUMAN	0.6	FXYD domain-containing ion transport regulator
Q9GZS0	DNAI2_HUMAN	0.56	Dynein intermediate chain 2, axonemal
O43812	DUX1_HUMAN	-1.33	Double homeobox protein 1
P28360	MSX1_HUMAN	0.7	Homeobox protein MSX-1
P53539	FOSB_HUMAN	3.66	Protein fosB
Q2QGD7	ZXDC_HUMAN	2.28	Zinc finger protein ZXDC
Q86VW0	SESD1_HUMAN	-0.57	SEC14 domain and spectrin repeat-containing pro
Q5SSJ5	HP1B3_HUMAN	2.59	Heterochromatin protein 1-binding protein 3
Q9HC78	ZBT20_HUMAN	0.96	Zinc finger and BTB domain-containing protein 2
Q86UY8	NT5D3_HUMAN	0.1	5'-nucleotidase domain-containing protein 3
Q9C0F3	ZN436_HUMAN	1.14	Zinc finger protein 436
Q9Y6E2	BZW2_HUMAN	-0.73	Basic leucine zipper and W2 domain-containing pr
P15927	RFA2_HUMAN	-0.16	Replication protein A 32 kDa subunit
A6NEQ2	F181B_HUMAN	3.51	Protein FAM181B
Q9BYE0	HES7_HUMAN	2.48	Transcription factor HES-7
Q68CZ2	TENS3_HUMAN	2.36	Tensin-3
Q8IWE5	PKHM2_HUMAN	3.23	Pleckstrin homology domain-containing family M
P17544	ATF7_HUMAN	1.72	Cyclic AMP-dependent transcription factor ATF-7
P14652	HXB2_HUMAN	1.28	Homeobox protein Hox-B2
Q9P0W2	HM20B_HUMAN	1.3	SWI/SNF-related matrix-associated actin-depende
Q8NH48	OR5B3_HUMAN	-0.74	Olfactory receptor 5B3
Q9Y6V7	DDX49_HUMAN	-0.72	Probable ATP-dependent RNA helicase DDX49
P51693	APLP1_HUMAN	1.78	Amyloid-like protein 1
Q13043	STK4_HUMAN	-0.19	Serine/threonine-protein kinase 4
Q13616	CUL1_HUMAN	1.17	Cullin-1
Q92835	SHIP1_HUMAN	2.39	Phosphatidylinositol 3,4,5-trisphosphate 5-phos
P21127	CD11B_HUMAN	3.12	Cyclin-dependent kinase 11B
Q8WXF3	REL3_HUMAN	0.35	Relaxin-3
O43310	CTIF_HUMAN	2.56	CBP80/20-dependent translation initiation factor
Q96DB5	RMD1_HUMAN	3.13	Regulator of microtubule dynamics protein 1
O75143	ATG13_HUMAN	1.97	Autophagy-related protein 13
O60504	VINEX_HUMAN	3.47	Vinexin
Q8NBQ5	DHB11_HUMAN	-0.34	Estradiol 17-beta-dehydrogenase 11
Q9BU20	RSG1_HUMAN	-1.03	REM2- and Rab-like small GTPase 1
Q92802	N42L2_HUMAN	2.77	NEDD4-binding protein 2-like 2
Q9Y2B5	VP9D1_HUMAN	2.76	VPS9 domain-containing protein 1
Q6ZSI9	CAN12_HUMAN	2.71	Calpain-12
Q15555	MARE2_HUMAN	1.31	Microtubule-associated protein RP/EB family mem
Q9Y5I1	PCDAB_HUMAN	2.19	Protocadherin alpha-11
Q96K80	ZC3HA_HUMAN	2.38	Zinc finger CCCH domain-containing protein 10
Q01085	TIAR_HUMAN	5	Nucleolysin TIAR
P05362	ICAM1_HUMAN	0.59	Intercellular adhesion molecule 1
P12644	BMP4_HUMAN	1.68	Bone morphogenetic protein 4
Q9H3Y0	CRSPL_HUMAN	0.99	Peptidase inhibitor R3HDML
Q9HAP6	LIN7B_HUMAN	0.22	Protein lin-7 homolog B
Q96KX0	LYZL4_HUMAN	1.33	Lysozyme-like protein 4
O00764	PDXK_HUMAN	-0.99	Pyridoxal kinase
Q8N131	PORIM_HUMAN	1.17	Porimin
Q9Y6A4	CFA20_HUMAN	-0.6	Cilia- and flagella-associated protein 20
Q13395	TARB1_HUMAN	-0.46	Probable methyltransferase TARBP1
A0A0U1RRI6	A0A0U1RRI6_HUMAN	-0.29	Protein CENPVL3
Q9Y264	ANGP4_HUMAN	1.72	Angiopoietin-4
O75113	N4BP1_HUMAN	1.01	NEDD4-binding protein 1
P49189	AL9A1_HUMAN	0.95	4-trimethylaminobutyraldehyde dehydrogenase
Q6ZSA7	LRC55_HUMAN	-0.84	Leucine-rich repeat-containing protein 55
Q9ULJ3	ZBT21_HUMAN	1.67	Zinc finger and BTB domain-containing protein 2
P83110	HTRA3_HUMAN	0.98	Serine protease HTRA3
O14638	ENPP3_HUMAN	1.31	Ectonucleotide pyrophosphatase/phosphodiesteras
O43581	SYT7_HUMAN	0.16	Synaptotagmin-7
P30954	O10J1_HUMAN	-0.48	Olfactory receptor 10J1
Q96D31	CRCM1_HUMAN	1.36	Calcium release-activated calcium channel prote
Q9NTK5	OLA1_HUMAN	0.31	Obg-like ATPase 1
P48201	AT5G3_HUMAN	-0.19	ATP synthase F(0) complex subunit C3, mitochond
P61225	RAP2B_HUMAN	-0.2	Ras-related protein Rap-2b
Q9UNF0	PACN2_HUMAN	1.65	Protein kinase C and casein kinase substrate in
Q9NV12	TM140_HUMAN	-1.01	Transmembrane protein 140
Q8N912	NRAC_HUMAN	0.58	Nutritionally-regulated adipose and cardiac enri
O43592	XPOT_HUMAN	0.25	Exportin-T
Q52LD8	RFTN2_HUMAN	1.22	Raftlin-2
D6RBM5	U17LN_HUMAN	-0.99	Putative ubiquitin carboxyl-terminal hydrolase
O75164	KDM4A_HUMAN	2	Lysine-specific demethylase 4A
Q8TCT8	SPP2A_HUMAN	-0.03	Signal peptide peptidase-like 2A
O60353	FZD6_HUMAN	0.38	Frizzled-6
P35250	RFC2_HUMAN	0.18	Replication factor C subunit 2
Q9BUP3	HTAI2_HUMAN	-0.38	Oxidoreductase HTATIP2
Q12962	TAF10_HUMAN	1.57	Transcription initiation factor TFIID subunit 1
P31273	HXC8_HUMAN	2.93	Homeobox protein Hox-C8
O14931	NCTR3_HUMAN	-0.38	Natural cytotoxicity triggering receptor 3
Q9UNX4	WDR3_HUMAN	0.01	WD repeat-containing protein 3
P09493	TPM1_HUMAN	-1.76	Tropomyosin alpha-1 chain
Q9UBP6	TRMB_HUMAN	-0.83	tRNA (guanine-N(7)-)-methyltransferase
Q86VS3	IQCH_HUMAN	0.57	IQ domain-containing protein H
Q8WUA8	TSK_HUMAN	1.33	Tsukushin
A6NHG9	O5H14_HUMAN	0.07	Olfactory receptor 5H14
Q96A56	T53I1_HUMAN	-0.26	Tumor protein p53-inducible nuclear protein 1
Q9ULK0	GRID1_HUMAN	2.03	Glutamate receptor ionotropic, delta-1
Q06495	NPT2A_HUMAN	1.83	Sodium-dependent phosphate transport protein 2A
Q96MC5	CP045_HUMAN	-0.54	Uncharacterized protein C16orf45
Q14781	CBX2_HUMAN	1.88	Chromobox protein homolog 2
Q8N8Y2	VA0D2_HUMAN	-0.87	V-type proton ATPase subunit d 2
Q6P474	PDXD2_HUMAN	-0.08	Putative pyridoxal-dependent decarboxylase doma
P02788	TRFL_HUMAN	1.31	Lactotransferrin
Q16401	PSMD5_HUMAN	-0.45	26S proteasome non-ATPase regulatory subunit 5
P0CJ85	DU4L2_HUMAN	2.83	Double homeobox protein 4-like protein 2
Q9H9C1	SPE39_HUMAN	1.01	Spermatogenesis-defective protein 39 homolog
Q7L8J4	3BP5L_HUMAN	1.62	SH3 domain-binding protein 5-like
Q9H3R5	CENPH_HUMAN	-0.44	Centromere protein H
Q96DC7	TMCO6_HUMAN	-0.64	Transmembrane and coiled-coil domain-containing
Q8TEY7	UBP33_HUMAN	0.93	Ubiquitin carboxyl-terminal hydrolase 33
Q9HCS4	TF7L1_HUMAN	2.4	Transcription factor 7-like 1
P63162	RSMN_HUMAN	2.48	Small nuclear ribonucleoprotein-associated prote
O60784	TOM1_HUMAN	1.16	Target of Myb protein 1
Q8N0W3	FUK_HUMAN	1.45	L-fucose kinase
Q9NZV1	CRIM1_HUMAN	3.19	Cysteine-rich motor neuron 1 protein
Q9NS69	TOM22_HUMAN	-0.71	Mitochondrial import receptor subunit TOM22 hom
Q6TDU7	CASC1_HUMAN	0.39	Protein CASC1
Q08AN1	ZN616_HUMAN	0.25	Zinc finger protein 616
Q6ZRI0	OTOG_HUMAN	2.68	Otogelin
Q05BQ5	MBTD1_HUMAN	1.37	MBT domain-containing protein 1
Q9H9V9	JMJD4_HUMAN	0.78	JmjC domain-containing protein 4
Q13472	TOP3A_HUMAN	3.99	DNA topoisomerase 3-alpha
A6NEN9	CX065_HUMAN	0.43	Uncharacterized protein CXorf65
Q15835	RK_HUMAN	1.2	Rhodopsin kinase
A8MT70	ZBBX_HUMAN	0.97	Zinc finger B-box domain-containing protein 1
Q9BZB8	CPEB1_HUMAN	1.6	Cytoplasmic polyadenylation element-binding pro
P46597	ASMT_HUMAN	-0.57	Acetylserotonin O-methyltransferase
Q9HB89	NMUR1_HUMAN	0.69	Neuromedin-U receptor 1
P00326	ADH1G_HUMAN	0.7	Alcohol dehydrogenase 1C
Q8NFP7	NUD10_HUMAN	0.38	Diphosphoinositol polyphosphate phosphohydrolas
Q8N357	S35F6_HUMAN	-0.69	Solute carrier family 35 member F6
Q9Y394	DHRS7_HUMAN	0.3	Dehydrogenase/reductase SDR family member 7
Q6P387	CP046_HUMAN	0.38	Uncharacterized protein C16orf46
Q3LI77	KR134_HUMAN	4.11	Keratin-associated protein 13-4
Q9BQG1	SYT3_HUMAN	1.89	Synaptotagmin-3
Q687X5	STEA4_HUMAN	0.58	Metalloreductase STEAP4
P34982	OR1D2_HUMAN	-0.95	Olfactory receptor 1D2
Q96BQ1	FAM3D_HUMAN	-0.21	Protein FAM3D
Q96FV3	TSN17_HUMAN	0.92	Tetraspanin-17
O43295	SRGP3_HUMAN	2.64	SLIT-ROBO Rho GTPase-activating protein 3
Q8N349	OR2LD_HUMAN	-1.2	Olfactory receptor 2L13
P50548	ERF_HUMAN	3.08	ETS domain-containing transcription factor ERF
P30874	SSR2_HUMAN	-0.54	Somatostatin receptor type 2
Q2TBC4	PRIC4_HUMAN	2.76	Prickle-like protein 4
Q9NRH2	SNRK_HUMAN	5.25	SNF-related serine/threonine-protein kinase
P48436	SOX9_HUMAN	3.52	Transcription factor SOX-9
Q8N127	O5AS1_HUMAN	-0.85	Olfactory receptor 5AS1
Q3MJ62	ZSC23_HUMAN	-0.25	Zinc finger and SCAN domain-containing protein
Q9BY19	M4A8_HUMAN	0.55	Membrane-spanning 4-domains subfamily A member 8
Q17RR3	LIPR3_HUMAN	1.47	Pancreatic lipase-related protein 3
Q96A23	CPNE4_HUMAN	0.26	Copine-4
Q9Y257	KCNK6_HUMAN	-0.18	Potassium channel subfamily K member 6
O94913	PCF11_HUMAN	5.1	Pre-mRNA cleavage complex 2 protein Pcf11
Q9H6I2	SOX17_HUMAN	3.56	Transcription factor SOX-17
Q8N8J6	ZN615_HUMAN	1.06	Zinc finger protein 615
P28566	5HT1E_HUMAN	-0.05	5-hydroxytryptamine receptor 1E
Q8IYB0	YK038_HUMAN	0.77	Putative uncharacterized protein MGC39545
O43837	IDH3B_HUMAN	-0.16	Isocitrate dehydrogenase [NAD] subunit beta, mi
P33991	MCM4_HUMAN	2.06	DNA replication licensing factor MCM4
Q9NX36	DJC28_HUMAN	-0.16	DnaJ homolog subfamily C member 28
O60268	K0513_HUMAN	2.54	Uncharacterized protein KIAA0513
Q9Y232	CDYL1_HUMAN	0.77	Chromodomain Y-like protein
Q8IZA3	H1FOO_HUMAN	1.99	Histone H1oo
Q6PID8	KLD10_HUMAN	1.71	Kelch domain-containing protein 10
Q8NGZ3	O13G1_HUMAN	-0.82	Olfactory receptor 13G1
Q6UX39	AMTN_HUMAN	1.38	Amelotin
Q6P050	FXL22_HUMAN	1	F-box and leucine-rich protein 22
P20963	CD3Z_HUMAN	-1.35	T-cell surface glycoprotein CD3 zeta chain
Q6ZRR9	DCDC5_HUMAN	-0.39	Doublecortin domain-containing protein 5
Q2KHN1	RN151_HUMAN	1.14	RING finger protein 151
P18848	ATF4_HUMAN	2.17	Cyclic AMP-dependent transcription factor ATF-4
Q8IYJ3	SYTL1_HUMAN	0.78	Synaptotagmin-like protein 1
Q8NI36	WDR36_HUMAN	0.96	WD repeat-containing protein 36
Q7Z7A1	CNTRL_HUMAN	2.38	Centriolin
Q57Z89	Q57Z89_HUMAN	1.31	HCG1732469
Q9BTN0	LRFN3_HUMAN	0.28	Leucine-rich repeat and fibronectin type-III do
O75354	ENTP6_HUMAN	1.28	Ectonucleoside triphosphate diphosphohydrolase
Q9UBF1	MAGC2_HUMAN	2.2	Melanoma-associated antigen C2
Q9NP70	AMBN_HUMAN	2.83	Ameloblastin
Q6UXB4	CLC4G_HUMAN	1.78	C-type lectin domain family 4 member G
P0CB38	PAB4L_HUMAN	1.34	Polyadenylate-binding protein 4-like
Q15038	DAZP2_HUMAN	1.68	DAZ-associated protein 2
Q8NGS1	OR1J4_HUMAN	0.07	Olfactory receptor 1J4
Q6NT04	TIGD7_HUMAN	-0.09	Tigger transposable element-derived protein 7
Q8TEP8	CE192_HUMAN	2.47	Centrosomal protein of 192 kDa
Q4VC31	CCD58_HUMAN	0.03	Coiled-coil domain-containing protein 58
Q96RG2	PASK_HUMAN	1.09	PAS domain-containing serine/threonine-protein k
Q9HCB6	SPON1_HUMAN	1.61	Spondin-1
Q14693	LPIN1_HUMAN	1.26	Phosphatidate phosphatase LPIN1
Q15714	T22D1_HUMAN	2.2	TSC22 domain family protein 1
Q8IW35	CEP97_HUMAN	0.24	Centrosomal protein of 97 kDa
P58658	EVA1C_HUMAN	-0.12	Protein eva-1 homolog C
Q96QH8	LYZL5_HUMAN	1.62	Sperm acrosome-associated protein 5
Q9QC07	POK18_HUMAN	-0.03	Endogenous retrovirus group K member 18 Pol pro
P48546	GIPR_HUMAN	0.66	Gastric inhibitory polypeptide receptor
P05121	PAI1_HUMAN	0.76	Plasminogen activator inhibitor 1
Q0D2K2	KLH30_HUMAN	1.07	Kelch-like protein 30
Q9Y5I3	PCDA1_HUMAN	2.18	Protocadherin alpha-1
Q9BTE0	NAT9_HUMAN	-1.01	N-acetyltransferase 9
Q92731	ESR2_HUMAN	2.43	Estrogen receptor beta
O60931	CTNS_HUMAN	-0.63	Cystinosin
Q8TAA3	PSA7L_HUMAN	-0.24	Proteasome subunit alpha type-7-like
Q8NFU5	IPMK_HUMAN	1.6	Inositol polyphosphate multikinase
Q5TDH0	DDI2_HUMAN	1.79	Protein DDI1 homolog 2
Q9H1B4	NXF5_HUMAN	0.4	Nuclear RNA export factor 5
Q9UP65	PA24C_HUMAN	0.37	Cytosolic phospholipase A2 gamma
Q96H22	CENPN_HUMAN	-0.39	Centromere protein N
Q6GPH4	XAF1_HUMAN	0.36	XIAP-associated factor 1
Q9ULI1	NWD2_HUMAN	0.2	NACHT and WD repeat domain-containing protein 2
Q86WU2	LDHD_HUMAN	0.75	Probable D-lactate dehydrogenase, mitochondrial
Q9ULC3	RAB23_HUMAN	0.47	Ras-related protein Rab-23
A6NMB9	FIGL2_HUMAN	3.61	Putative fidgetin-like protein 2
Q9UJU2	LEF1_HUMAN	3.15	Lymphoid enhancer-binding factor 1
Q8NHV9	RHXF1_HUMAN	3.96	Rhox homeobox family member 1
Q86WA6	BPHL_HUMAN	-0.38	Valacyclovir hydrolase
F2Z333	CA233_HUMAN	0.93	Fibronectin type-III domain-containing transmem
O75564	JERKY_HUMAN	0.21	Jerky protein homolog
Q15386	UBE3C_HUMAN	0	Ubiquitin-protein ligase E3C
Q9UPU5	UBP24_HUMAN	6.89	Ubiquitin carboxyl-terminal hydrolase 24
Q9BXX0	EMIL2_HUMAN	3.03	EMILIN-2
Q13686	ALKB1_HUMAN	0.87	DNA demethylase ALKBH1
Q92952	KCNN1_HUMAN	3.46	Small conductance calcium-activated potassium c
Q3KQU3	MA7D1_HUMAN	5.03	MAP7 domain-containing protein 1
Q9NYW4	TA2R5_HUMAN	-0.46	Taste receptor type 2 member 5
Q96PG2	M4A10_HUMAN	-0.24	Membrane-spanning 4-domains subfamily A member
Q9H0I9	TKTL2_HUMAN	0.4	Transketolase-like protein 2
Q9Y252	RNF6_HUMAN	1.95	E3 ubiquitin-protein ligase RNF6
Q9NRV9	HEBP1_HUMAN	0.06	Heme-binding protein 1
Q8IX07	FOG1_HUMAN	4	Zinc finger protein ZFPM1
Q6IQ19	CCSAP_HUMAN	1.62	Centriole, cilia and spindle-associated protein
O95835	LATS1_HUMAN	3.03	Serine/threonine-protein kinase LATS1
P56915	GSC_HUMAN	2.76	Homeobox protein goosecoid
Q9H0K1	SIK2_HUMAN	2.18	Serine/threonine-protein kinase SIK2
P13010	XRCC5_HUMAN	0.57	X-ray repair cross-complementing protein 5
Q9H1N7	S35B3_HUMAN	-0.57	Adenosine 3'-phospho 5'-phosphosulfate transpor
Q9NRX1	PNO1_HUMAN	-0.29	RNA-binding protein PNO1
Q9H346	O52D1_HUMAN	-0.85	Olfactory receptor 52D1
Q2M243	CCD27_HUMAN	1.24	Coiled-coil domain-containing protein 27
O15519	CFLAR_HUMAN	0.17	CASP8 and FADD-like apoptosis regulator
Q96RY5	CRML_HUMAN	3.78	Protein cramped-like
P37173	TGFR2_HUMAN	0.62	TGF-beta receptor type-2
P51825	AFF1_HUMAN	2.26	AF4/FMR2 family member 1
A4D0S4	LAMB4_HUMAN	5.35	Laminin subunit beta-4
C9J4A7	C9J4A7_HUMAN	-0.68	Uncharacterized protein (Fragment)
O60566	BUB1B_HUMAN	0.78	Mitotic checkpoint serine/threonine-protein kin
Q58FF6	H90B4_HUMAN	-0.84	Putative heat shock protein HSP 90-beta 4
Q8IZT6	ASPM_HUMAN	0.39	Abnormal spindle-like microcephaly-associated pr
O14965	AURKA_HUMAN	1.52	Aurora kinase A
P39900	MMP12_HUMAN	2.01	Macrophage metalloelastase
Q9UGM1	ACHA9_HUMAN	0.9	Neuronal acetylcholine receptor subunit alpha-9
Q01804	OTUD4_HUMAN	3.83	OTU domain-containing protein 4
Q9H490	PIGU_HUMAN	-1.32	Phosphatidylinositol glycan anchor biosynthesis
Q96K30	RITA1_HUMAN	2.67	RBPJ-interacting and tubulin-associated protein
Q8TEH3	DEN1A_HUMAN	2.86	DENN domain-containing protein 1A
P01241	SOMA_HUMAN	0.63	Somatotropin
Q9BVC5	ASHWN_HUMAN	0.39	Ashwin
P0CI00	Z705B_HUMAN	-0.4	Putative zinc finger protein 705B
Q9H8U3	ZFAN3_HUMAN	1.48	AN1-type zinc finger protein 3
P11168	GTR2_HUMAN	0.45	Solute carrier family 2, facilitated glucose tra
P54920	SNAA_HUMAN	-1.17	Alpha-soluble NSF attachment protein
P10589	COT1_HUMAN	3.09	COUP transcription factor 1
P24723	KPCL_HUMAN	-0.02	Protein kinase C eta type
Q9H2A3	NGN2_HUMAN	3.09	Neurogenin-2
P0DI82	TPC2B_HUMAN	-0.74	Trafficking protein particle complex subunit 2B
P62993	GRB2_HUMAN	0.89	Growth factor receptor-bound protein 2
Q99542	MMP19_HUMAN	1.6	Matrix metalloproteinase-19
Q9P2K9	DISP3_HUMAN	0.95	Protein dispatched homolog 3
P09132	SRP19_HUMAN	-1.96	Signal recognition particle 19 kDa protein
Q9NVR7	TBCC1_HUMAN	1.3	TBCC domain-containing protein 1
P50851	LRBA_HUMAN	1.14	Lipopolysaccharide-responsive and beige-like anc
O00555	CAC1A_HUMAN	4.52	Voltage-dependent P/Q-type calcium channel subu
Q9Y2T6	GPR55_HUMAN	-0.79	G-protein coupled receptor 55
Q6ZS81	WDFY4_HUMAN	1.45	WD repeat- and FYVE domain-containing protein 4
P51648	AL3A2_HUMAN	1.91	Fatty aldehyde dehydrogenase
Q14236	EPAG_HUMAN	0.25	Early lymphoid activation gene protein
O75554	WBP4_HUMAN	1.04	WW domain-binding protein 4
Q9Y5G0	PCDGH_HUMAN	1.51	Protocadherin gamma-B5
P59894	DCDC1_HUMAN	-0.05	Doublecortin domain-containing protein 1
Q04609	FOLH1_HUMAN	2.04	Glutamate carboxypeptidase 2
Q9P2F6	RHG20_HUMAN	1.52	Rho GTPase-activating protein 20
P79483	DRB3_HUMAN	0.25	HLA class II histocompatibility antigen, DR beta
P49069	CAMLG_HUMAN	1.12	Calcium signal-modulating cyclophilin ligand
O95157	NXPH3_HUMAN	0.92	Neurexophilin-3
Q99445	GML_HUMAN	-0.4	Glycosyl-phosphatidylinositol-anchored molecule-l
O14672	ADA10_HUMAN	1.65	Disintegrin and metalloproteinase domain-contai
Q8N0V3	RBFA_HUMAN	0.71	Putative ribosome-binding factor A, mitochondria
P23490	LORI_HUMAN	12.31	Loricrin
O95678	K2C75_HUMAN	7.55	Keratin, type II cytoskeletal 75
P78396	CCNA1_HUMAN	0.99	Cyclin-A1
Q8N5Y2	MS3L1_HUMAN	0.73	Male-specific lethal 3 homolog
O95567	CV031_HUMAN	-0.05	Uncharacterized protein C22orf31
Q6ZN57	ZFP2_HUMAN	-0.54	Zinc finger protein 2 homolog
Q8N0Z3	SPICE_HUMAN	3.17	Spindle and centriole-associated protein 1
P29218	IMPA1_HUMAN	0.57	Inositol monophosphatase 1
Q9Y2Z9	COQ6_HUMAN	0.43	Ubiquinone biosynthesis monooxygenase COQ6, mito
Q8N3J6	CADM2_HUMAN	0.17	Cell adhesion molecule 2
P26232	CTNA2_HUMAN	0.67	Catenin alpha-2
P02675	FIBB_HUMAN	2.73	Fibrinogen beta chain
Q08AI8	CB054_HUMAN	0.17	Uncharacterized protein C2orf54
O95672	ECEL1_HUMAN	1.66	Endothelin-converting enzyme-like 1
Q9H4F8	SMOC1_HUMAN	3.12	SPARC-related modular calcium-binding protein 1
A4D2B0	MBLC1_HUMAN	1.05	Metallo-beta-lactamase domain-containing protei
Q8IZP9	AGRG2_HUMAN	2.07	Adhesion G-protein coupled receptor G2
O14793	GDF8_HUMAN	1.1	Growth/differentiation factor 8
P49640	EVX1_HUMAN	3.71	Homeobox even-skipped homolog protein 1
P0DMV1	CT458_HUMAN	1.05	Cancer/testis antigen family 45 member A8
P01730	CD4_HUMAN	-0.53	T-cell surface glycoprotein CD4
Q6PH81	CP087_HUMAN	-0.99	UPF0547 protein C16orf87
Q8WUX9	CHMP7_HUMAN	0.19	Charged multivesicular body protein 7
Q2M1Z3	RHG31_HUMAN	2.36	Rho GTPase-activating protein 31
Q3B7J2	GFOD2_HUMAN	0.36	Glucose-fructose oxidoreductase domain-containi
P56179	DLX6_HUMAN	1.29	Homeobox protein DLX-6
P15153	RAC2_HUMAN	0.32	Ras-related C3 botulinum toxin substrate 2
Q8IVS8	GLCTK_HUMAN	0.82	Glycerate kinase
Q6N063	OGFD2_HUMAN	0.56	2-oxoglutarate and iron-dependent oxygenase dom
Q6ZRT6	PR23B_HUMAN	1.59	Proline-rich protein 23B
Q99819	GDIR3_HUMAN	0.35	Rho GDP-dissociation inhibitor 3
A6NEE1	PLHD1_HUMAN	0.14	Pleckstrin homology domain-containing family D
Q3KRA9	ALKB6_HUMAN	1.41	Alpha-ketoglutarate-dependent dioxygenase alkB
Q68EM7	RHG17_HUMAN	3.95	Rho GTPase-activating protein 17
O75762	TRPA1_HUMAN	0.16	Transient receptor potential cation channel sub
Q9Y2L6	FRM4B_HUMAN	3.39	FERM domain-containing protein 4B
Q9P212	PLCE1_HUMAN	2	1-phosphatidylinositol 4,5-bisphosphate phospho
Q9Y289	SC5A6_HUMAN	0.75	Sodium-dependent multivitamin transporter
Q9UM47	NOTC3_HUMAN	5.52	Neurogenic locus notch homolog protein 3
Q9UJ90	KCNE5_HUMAN	-0.5	Potassium voltage-gated channel subfamily E reg
Q96NZ9	PRAP1_HUMAN	-0.24	Proline-rich acidic protein 1
Q86Y25	Z354C_HUMAN	0.05	Zinc finger protein 354C
Q9NUM3	S39A9_HUMAN	-0.17	Zinc transporter ZIP9
Q9UHD0	IL19_HUMAN	-1.78	Interleukin-19
Q96M83	CCDC7_HUMAN	0.39	Coiled-coil domain-containing protein 7
Q9HBW1	LRRC4_HUMAN	0.78	Leucine-rich repeat-containing protein 4
Q7RTU0	TCF24_HUMAN	0.74	Transcription factor 24
Q6UB99	ANR11_HUMAN	2.37	Ankyrin repeat domain-containing protein 11
P52179	MYOM1_HUMAN	1.13	Myomesin-1
Q6ZR62	ZCH16_HUMAN	-0.78	Zinc finger CCHC domain-containing protein 16
Q9H3Y6	SRMS_HUMAN	1.59	Tyrosine-protein kinase Srms
Q6IE36	OVOS2_HUMAN	0.77	Ovostatin homolog 2
Q9H1C0	LPAR5_HUMAN	0.08	Lysophosphatidic acid receptor 5
A6NFU8	PGPIL_HUMAN	0.38	Pyroglutamyl-peptidase 1-like protein
P02774	VTDB_HUMAN	0.02	Vitamin D-binding protein
Q5TC82	RC3H1_HUMAN	3.41	Roquin-1
Q9BXU7	UBP26_HUMAN	0.66	Ubiquitin carboxyl-terminal hydrolase 26
Q8TB52	FBX30_HUMAN	1.07	F-box only protein 30
U3KPV4	A3LT2_HUMAN	0.78	Alpha-1,3-galactosyltransferase 2
Q9BXU9	CABP8_HUMAN	-1.06	Calcium-binding protein 8
Q9BUY5	ZN426_HUMAN	0.51	Zinc finger protein 426
O95343	SIX3_HUMAN	5.24	Homeobox protein SIX3
Q05707	COEA1_HUMAN	5.74	Collagen alpha-1(XIV) chain
Q8NGC1	O11G2_HUMAN	0.02	Olfactory receptor 11G2
Q9NRR2	TRYG1_HUMAN	2.13	Tryptase gamma
P34130	NTF4_HUMAN	0.59	Neurotrophin-4
P20142	PEPC_HUMAN	1.73	Gastricsin
P15884	ITF2_HUMAN	5.77	Transcription factor 4
Q8TDT2	GP152_HUMAN	1.9	Probable G-protein coupled receptor 152
Q8WX77	IBPL1_HUMAN	2.08	Insulin-like growth factor-binding protein-like
Q8IXS0	F217A_HUMAN	0.86	Protein FAM217A
Q8IZ16	CG061_HUMAN	-1.58	Uncharacterized protein C7orf61
Q9UHV7	MED13_HUMAN	3.73	Mediator of RNA polymerase II transcription sub
Q9H845	ACAD9_HUMAN	-0.18	Acyl-CoA dehydrogenase family member 9, mitocho
Q9BTT6	LRRC1_HUMAN	-0.7	Leucine-rich repeat-containing protein 1
Q6UX68	XKR5_HUMAN	1.42	XK-related protein 5
Q8N1F8	S11IP_HUMAN	1.97	Serine/threonine-protein kinase 11-interacting
Q5TZF3	ANR45_HUMAN	-1.71	Ankyrin repeat domain-containing protein 45
Q13336	UT1_HUMAN	-0.55	Urea transporter 1
Q9Y6X0	SETBP_HUMAN	3.24	SET-binding protein
Q96QH2	PRAM_HUMAN	2.81	PML-RARA-regulated adapter molecule 1
Q8NCE0	SEN2_HUMAN	0.94	tRNA-splicing endonuclease subunit Sen2
E7EML9	PRS44_HUMAN	2.26	Serine protease 44
Q96LS8	CB048_HUMAN	0.57	Uncharacterized protein C2orf48
Q8WVE0	N6MT2_HUMAN	-1.6	Protein-lysine N-methyltransferase N6AMT2
Q96MH7	CE034_HUMAN	1.16	Uncharacterized protein C5orf34
A2RU54	HMX2_HUMAN	2.26	Homeobox protein HMX2
Q9UMX9	S45A2_HUMAN	0.37	Membrane-associated transporter protein
O95425	SVIL_HUMAN	2.28	Supervillin
P04629	NTRK1_HUMAN	1.1	High affinity nerve growth factor receptor
Q6YBV0	S36A4_HUMAN	-0.67	Proton-coupled amino acid transporter 4
Q9P273	TEN3_HUMAN	6.75	Teneurin-3
P04062	GLCM_HUMAN	2.13	Glucosylceramidase
Q8IZV2	CKLF8_HUMAN	-0.24	CKLF-like MARVEL transmembrane domain-containin
P28356	HXD9_HUMAN	4.07	Homeobox protein Hox-D9
O15444	CCL25_HUMAN	-1.71	C-C motif chemokine 25
O75173	ATS4_HUMAN	5.47	A disintegrin and metalloproteinase with thrombo
Q15173	2A5B_HUMAN	0.72	Serine/threonine-protein phosphatase 2A 56 kDa r
Q2TAA5	ALG11_HUMAN	0.21	GDP-Man:Man(3)GlcNAc(2)-PP-Dol alpha-1,2-mannos
Q9P2D6	F135A_HUMAN	1.66	Protein FAM135A
Q9H0Q0	FA49A_HUMAN	-0.61	Protein FAM49A
P12271	RLBP1_HUMAN	-0.23	Retinaldehyde-binding protein 1
Q99075	HBEGF_HUMAN	-0.27	Proheparin-binding EGF-like growth factor
Q8N6M6	AMPO_HUMAN	1.42	Aminopeptidase O
P04001	OPSG_HUMAN	0.91	Medium-wave-sensitive opsin 1
O95932	TGM3L_HUMAN	0.49	Protein-glutamine gamma-glutamyltransferase 6
Q8NAN2	MIGA1_HUMAN	0.24	Mitoguardin-1
Q8TDQ0	HAVR2_HUMAN	0.33	Hepatitis A virus cellular receptor 2
O95248	MTMR5_HUMAN	2.37	Myotubularin-related protein 5
P49792	RBP2_HUMAN	3.28	E3 SUMO-protein ligase RanBP2
P06737	PYGL_HUMAN	1.18	Glycogen phosphorylase, liver form
Q9H7X3	ZN696_HUMAN	3.52	Zinc finger protein 696
Q8N8D1	PDCD7_HUMAN	4.66	Programmed cell death protein 7
P41217	OX2G_HUMAN	-0.12	OX-2 membrane glycoprotein
P56537	IF6_HUMAN	-0.48	Eukaryotic translation initiation factor 6
P00915	CAH1_HUMAN	1.07	Carbonic anhydrase 1
Q53S99	CB083_HUMAN	-0.59	Folate transporter-like protein C2orf83
Q9BXG8	SPZ1_HUMAN	-0.26	Spermatogenic leucine zipper protein 1
Q8N3Y1	FBXW8_HUMAN	-0.26	F-box/WD repeat-containing protein 8
O94829	IPO13_HUMAN	-0.72	Importin-13
Q5SV97	PERM1_HUMAN	3.55	PGC-1 and ERR-induced regulator in muscle prote
Q8IYA8	CCD36_HUMAN	0.79	Coiled-coil domain-containing protein 36
O75363	BCAS1_HUMAN	1.35	Breast carcinoma-amplified sequence 1
O60423	AT8B3_HUMAN	3.25	Phospholipid-transporting ATPase IK
Q96P09	BIRC8_HUMAN	-1.32	Baculoviral IAP repeat-containing protein 8
Q02153	GCYB1_HUMAN	0.38	Guanylate cyclase soluble subunit beta-1
Q13258	PD2R_HUMAN	-0.24	Prostaglandin D2 receptor
Q5TAH2	SL9C2_HUMAN	-0.03	Sodium/hydrogen exchanger 11
P50213	IDH3A_HUMAN	0.32	Isocitrate dehydrogenase [NAD] subunit alpha, m
Q93033	IGSF2_HUMAN	1.13	Immunoglobulin superfamily member 2
Q14592	ZN460_HUMAN	1.04	Zinc finger protein 460
Q9UKA9	PTBP2_HUMAN	0.75	Polypyrimidine tract-binding protein 2
P41587	VIPR2_HUMAN	1.18	Vasoactive intestinal polypeptide receptor 2
P17174	AATC_HUMAN	0.72	Aspartate aminotransferase, cytoplasmic
Q9NP99	TREM1_HUMAN	0.21	Triggering receptor expressed on myeloid cells
O43665	RGS10_HUMAN	-1.94	Regulator of G-protein signaling 10
Q14694	UBP10_HUMAN	3.09	Ubiquitin carboxyl-terminal hydrolase 10
Q6ZWT7	MBOA2_HUMAN	-0.24	Lysophospholipid acyltransferase 2
P29033	CXB2_HUMAN	0.37	Gap junction beta-2 protein
Q96BV0	ZN775_HUMAN	2.6	Zinc finger protein 775
P17535	JUND_HUMAN	3.77	Transcription factor jun-D
Q9HBT7	ZN287_HUMAN	0.61	Zinc finger protein 287
P0C264	SBK3_HUMAN	1.64	Uncharacterized serine/threonine-protein kinase
P05181	CP2E1_HUMAN	0.53	Cytochrome P450 2E1
Q9UGJ0	AAKG2_HUMAN	3.98	5'-AMP-activated protein kinase subunit gamma-2
Q8NER1	TRPV1_HUMAN	2.27	Transient receptor potential cation channel sub
O95749	GGPPS_HUMAN	-0.7	Geranylgeranyl pyrophosphate synthase
C9JC47	F157A_HUMAN	2.72	Putative protein FAM157A
Q15617	OR8G1_HUMAN	-0.94	Olfactory receptor 8G1
Q86UB9	TM135_HUMAN	-0.14	Transmembrane protein 135
Q14653	IRF3_HUMAN	1.09	Interferon regulatory factor 3
Q9Y5E1	PCDB9_HUMAN	1.74	Protocadherin beta-9
P42263	GRIA3_HUMAN	1.97	Glutamate receptor 3
Q53R12	T4S20_HUMAN	0.92	Transmembrane 4 L6 family member 20
Q99729	ROAA_HUMAN	15.84	Heterogeneous nuclear ribonucleoprotein A/B
O76031	CLPX_HUMAN	1.27	ATP-dependent Clp protease ATP-binding subunit c
O60551	NMT2_HUMAN	-0.55	Glycylpeptide N-tetradecanoyltransferase 2
Q96DZ9	CKLF5_HUMAN	-0.3	CKLF-like MARVEL transmembrane domain-containin
Q8TDF5	NETO1_HUMAN	1.5	Neuropilin and tolloid-like protein 1
Q6PGQ1	DRIC1_HUMAN	1.98	Aspartate-rich protein 1
P10074	ZBT48_HUMAN	1.16	Zinc finger and BTB domain-containing protein 4
Q8IWR1	TRI59_HUMAN	0.2	Tripartite motif-containing protein 59
Q96KW2	P12L2_HUMAN	3.35	POM121-like protein 2
O75154	RFIP3_HUMAN	3.67	Rab11 family-interacting protein 3
Q9HDC9	APMAP_HUMAN	1.31	Adipocyte plasma membrane-associated protein
Q8NAM6	ZSCA4_HUMAN	1.2	Zinc finger and SCAN domain-containing protein
Q9H1K0	RBNS5_HUMAN	3	Rabenosyn-5
P58505	CU058_HUMAN	2.9	Uncharacterized protein C21orf58
Q32MZ4	LRRF1_HUMAN	1.84	Leucine-rich repeat flightless-interacting prot
P0C6S8	LIGO3_HUMAN	1.54	Leucine-rich repeat and immunoglobulin-like dom
P30307	MPIP3_HUMAN	0.23	M-phase inducer phosphatase 3
Q5VVQ6	OTU1_HUMAN	0.19	Ubiquitin thioesterase OTU1
Q9HAY6	BCDO1_HUMAN	0.51	Beta,beta-carotene 15,15'-dioxygenase
Q9NP85	PODO_HUMAN	2.77	Podocin
Q9Y2G2	CARD8_HUMAN	-1.03	Caspase recruitment domain-containing protein 8
Q9UEG4	ZN629_HUMAN	1.68	Zinc finger protein 629
Q5SQ80	A20A2_HUMAN	1.03	Ankyrin repeat domain-containing protein 20A2
Q96Q15	SMG1_HUMAN	2.98	Serine/threonine-protein kinase SMG1
Q96KV7	WDR90_HUMAN	1.74	WD repeat-containing protein 90
O43609	SPY1_HUMAN	1.01	Protein sprouty homolog 1
Q13105	ZBT17_HUMAN	2.09	Zinc finger and BTB domain-containing protein 1
A0A0J9YXQ4	A0A0J9YXQ4_HUMAN	3.92	Uncharacterized protein
Q53TN4	CYBR1_HUMAN	-0.44	Cytochrome b reductase 1
Q17RS7	GEN_HUMAN	1.94	Flap endonuclease GEN homolog 1
Q8IUX7	AEBP1_HUMAN	3	Adipocyte enhancer-binding protein 1
Q6P1N0	C2D1A_HUMAN	1.73	Coiled-coil and C2 domain-containing protein 1A
Q9HC36	MRM3_HUMAN	0.74	rRNA methyltransferase 3, mitochondrial
Q9BRC7	PLCD4_HUMAN	0.85	1-phosphatidylinositol 4,5-bisphosphate phospho
Q9UGC7	RF1ML_HUMAN	0.64	Peptide chain release factor 1-like, mitochondr
Q9UGK8	SRGEF_HUMAN	1.4	Secretion-regulating guanine nucleotide exchang
P00519	ABL1_HUMAN	2.41	Tyrosine-protein kinase ABL1
Q8WU39	MZB1_HUMAN	-0.09	Marginal zone B- and B1-cell-specific protein
Q9UKJ0	PILRB_HUMAN	1.93	Paired immunoglobulin-like type 2 receptor beta
A0PJZ0	A20A5_HUMAN	-0.56	Putative ankyrin repeat domain-containing prote
Q52LR7	EPC2_HUMAN	1.22	Enhancer of polycomb homolog 2
Q8IV04	TB10C_HUMAN	1.95	Carabin
Q08499	PDE4D_HUMAN	1.33	cAMP-specific 3',5'-cyclic phosphodiesterase 4D
P50993	AT1A2_HUMAN	1.2	Sodium/potassium-transporting ATPase subunit al
Q8IYJ1	CPNE9_HUMAN	0.34	Copine-9
Q9NZ72	STMN3_HUMAN	3.17	Stathmin-3
O95498	VNN2_HUMAN	0.39	Vascular non-inflammatory molecule 2
Q96AC1	FERM2_HUMAN	0.68	Fermitin family homolog 2
Q96B01	R51A1_HUMAN	0.75	RAD51-associated protein 1
P78504	JAG1_HUMAN	4.84	Protein jagged-1
Q9Y446	PKP3_HUMAN	3.27	Plakophilin-3
Q92985	IRF7_HUMAN	1.13	Interferon regulatory factor 7
O43790	KRT86_HUMAN	6.2	Keratin, type II cuticular Hb6
O15375	MOT6_HUMAN	-0.64	Monocarboxylate transporter 6
Q9C0A1	ZFHX2_HUMAN	3.95	Zinc finger homeobox protein 2
Q6ZV65	FA47E_HUMAN	1.05	Protein FAM47E
P49840	GSK3A_HUMAN	6.42	Glycogen synthase kinase-3 alpha
Q9Y625	GPC6_HUMAN	1.65	Glypican-6
Q9UNT1	RBL2B_HUMAN	-0.91	Rab-like protein 2B
Q9NYQ3	HAOX2_HUMAN	-0.34	Hydroxyacid oxidase 2
Q9Y6M1	IF2B2_HUMAN	1.56	Insulin-like growth factor 2 mRNA-binding prote
Q8IW92	GLBL2_HUMAN	1.5	Beta-galactosidase-1-like protein 2
P17020	ZNF16_HUMAN	1.54	Zinc finger protein 16
Q6QAJ8	TM220_HUMAN	-1.75	Transmembrane protein 220
Q8NDH6	ICA1L_HUMAN	0.3	Islet cell autoantigen 1-like protein
Q8TD86	CALL6_HUMAN	-1.93	Calmodulin-like protein 6
Q5T7W0	ZN618_HUMAN	1.76	Zinc finger protein 618
Q0D2K0	NIPA4_HUMAN	1.62	Magnesium transporter NIPA4
P34059	GALNS_HUMAN	1.39	N-acetylgalactosamine-6-sulfatase
Q6ZMS4	ZN852_HUMAN	0.96	Zinc finger protein 852
Q96G42	KLD7B_HUMAN	3.54	Kelch domain-containing protein 7B
P48594	SPB4_HUMAN	0.22	Serpin B4
P10620	MGST1_HUMAN	-0.77	Microsomal glutathione S-transferase 1
Q4AC99	1A1L2_HUMAN	0.67	Probable inactive 1-aminocyclopropane-1-carboxy
Q86YB7	ECHD2_HUMAN	-0.97	Enoyl-CoA hydratase domain-containing protein 2
Q92750	TAF4B_HUMAN	1.28	Transcription initiation factor TFIID subunit 4
P62424	RL7A_HUMAN	0.05	60S ribosomal protein L7a
Q9H6L2	TM231_HUMAN	-0.19	Transmembrane protein 231
Q4G163	FBX43_HUMAN	1.84	F-box only protein 43
O75425	MSPD3_HUMAN	0.52	Motile sperm domain-containing protein 3
Q6UWH4	F198B_HUMAN	0.9	Protein FAM198B
Q04760	LGUL_HUMAN	1.98	Lactoylglutathione lyase
P23942	PRPH2_HUMAN	-0.16	Peripherin-2
Q12772	SRBP2_HUMAN	2.84	Sterol regulatory element-binding protein 2
O43364	HXA2_HUMAN	2.08	Homeobox protein Hox-A2
Q14165	MLEC_HUMAN	-0.36	Malectin
P24666	PPAC_HUMAN	0.82	Low molecular weight phosphotyrosine protein pho
A0A087WTJ2	A0A087WTJ2_HUMAN	0.26	Protein GIMAP1-GIMAP5
O75094	SLIT3_HUMAN	2.21	Slit homolog 3 protein
Q96JN0	LCOR_HUMAN	2.14	Ligand-dependent corepressor
Q9H082	RB33B_HUMAN	-0.6	Ras-related protein Rab-33B
P25189	MYP0_HUMAN	0.09	Myelin protein P0
P09105	HBAT_HUMAN	-1.13	Hemoglobin subunit theta-1
Q9BTK6	PAGR1_HUMAN	1.14	PAXIP1-associated glutamate-rich protein 1
O95264	5HT3B_HUMAN	-0.26	5-hydroxytryptamine receptor 3B
Q6P5X7	TMM71_HUMAN	1.94	Transmembrane protein 71
Q9UKI8	TLK1_HUMAN	2.59	Serine/threonine-protein kinase tousled-like 1
Q53RT3	APRV1_HUMAN	-0.1	Retroviral-like aspartic protease 1
P62068	UBP46_HUMAN	0.96	Ubiquitin carboxyl-terminal hydrolase 46
Q2NL68	PRSR3_HUMAN	1.91	Proline and serine-rich protein 3
Q6NUM9	RETST_HUMAN	1.55	All-trans-retinol 13,14-reductase
Q9BZG2	PPAT_HUMAN	1.53	Testicular acid phosphatase
Q96DG6	CMBL_HUMAN	-0.22	Carboxymethylenebutenolidase homolog
Q9GZK7	O11A1_HUMAN	-0.64	Olfactory receptor 11A1
Q8WXK3	ASB13_HUMAN	-0.04	Ankyrin repeat and SOCS box protein 13
Q8NC56	LEMD2_HUMAN	1.42	LEM domain-containing protein 2
Q9NQ92	COPRS_HUMAN	0.61	Coordinator of PRMT5 and differentiation stimul
Q9HCD6	TANC2_HUMAN	3.42	Protein TANC2
Q92737	RSLAA_HUMAN	1.15	Ras-like protein family member 10A
P51993	FUT6_HUMAN	0.18	Alpha-(1,3)-fucosyltransferase 6
Q06547	GABP1_HUMAN	1.13	GA-binding protein subunit beta-1
Q8NGY2	OR6K2_HUMAN	-0.3	Olfactory receptor 6K2
Q9P013	CWC15_HUMAN	-0.35	Spliceosome-associated protein CWC15 homolog
Q12894	IFRD2_HUMAN	2.05	Interferon-related developmental regulator 2
Q9NPB8	GPCP1_HUMAN	0.16	Glycerophosphocholine phosphodiesterase GPCPD1
Q9H7M9	VISTA_HUMAN	0.74	V-type immunoglobulin domain-containing suppres
Q86UW6	N4BP2_HUMAN	1.36	NEDD4-binding protein 2
Q9NVM4	ANM7_HUMAN	2.01	Protein arginine N-methyltransferase 7
Q02223	TNR17_HUMAN	0.86	Tumor necrosis factor receptor superfamily memb
O43186	CRX_HUMAN	2.38	Cone-rod homeobox protein
Q9HBV1	POPD3_HUMAN	-0.86	Popeye domain-containing protein 3
Q96MF6	CQ10A_HUMAN	0.46	Coenzyme Q-binding protein COQ10 homolog A, mit
Q8WTV0	SCRB1_HUMAN	0.7	Scavenger receptor class B member 1
Q16690	DUS5_HUMAN	-0.03	Dual specificity protein phosphatase 5
Q96S86	HPLN3_HUMAN	1.07	Hyaluronan and proteoglycan link protein 3
Q5D862	FILA2_HUMAN	12.03	Filaggrin-2
Q9UQF0	SYCY1_HUMAN	2.21	Syncytin-1
P55042	RAD_HUMAN	2.1	GTP-binding protein RAD
Q9NZH6	IL37_HUMAN	0.29	Interleukin-37
Q99424	ACOX2_HUMAN	-0.13	Peroxisomal acyl-coenzyme A oxidase 2
Q9NSD7	RL3R1_HUMAN	-0.01	Relaxin-3 receptor 1
Q9Y219	JAG2_HUMAN	4.63	Protein jagged-2
Q8NH08	O10AC_HUMAN	-0.25	Olfactory receptor 10AC1
Q9BZD7	TMG3_HUMAN	0.04	Transmembrane gamma-carboxyglutamic acid protein
Q92624	APBP2_HUMAN	-0.25	Amyloid protein-binding protein 2
Q8TAF3	WDR48_HUMAN	0.85	WD repeat-containing protein 48
C9J069	CI172_HUMAN	3.64	Uncharacterized protein C9orf172
O14512	SOCS7_HUMAN	2.32	Suppressor of cytokine signaling 7
Q5JUW0	KRBX4_HUMAN	-1.17	KRAB domain-containing protein 4
Q6PRD7	CEMP1_HUMAN	0.18	Cementoblastoma-derived protein 1
Q96IK5	GMCL1_HUMAN	1.7	Germ cell-less protein-like 1
P48431	SOX2_HUMAN	3.32	Transcription factor SOX-2
H3BV60	TGR3L_HUMAN	2.11	Transforming growth factor-beta receptor type 3
Q13620	CUL4B_HUMAN	1.8	Cullin-4B
Q16584	M3K11_HUMAN	4.56	Mitogen-activated protein kinase kinase kinase
Q7Z602	GP141_HUMAN	-0.68	Probable G-protein coupled receptor 141
P61247	RS3A_HUMAN	-0.27	40S ribosomal protein S3a
O14524	NEMP1_HUMAN	0.68	Nuclear envelope integral membrane protein 1
Q8TD90	MAGE2_HUMAN	1.2	Melanoma-associated antigen E2
Q07326	PIGF_HUMAN	-0.87	Phosphatidylinositol-glycan biosynthesis class F
Q8TBF2	PGFS_HUMAN	0.89	Prostamide/prostaglandin F synthase
Q8N2A8	PLD6_HUMAN	-1.22	Mitochondrial cardiolipin hydrolase
Q15270	NKX11_HUMAN	4.59	NK1 transcription factor-related protein 1
A6NCQ9	RN222_HUMAN	0.51	RING finger protein 222
Q05932	FOLC_HUMAN	0.15	Folylpolyglutamate synthase, mitochondrial
Q9Y5R8	TPPC1_HUMAN	-0.22	Trafficking protein particle complex subunit 1
P28370	SMCA1_HUMAN	0.05	Probable global transcription activator SNF2L1
Q7L592	NDUF7_HUMAN	-0.6	NADH dehydrogenase [ubiquinone] complex I, asse
Q13461	FOXE3_HUMAN	1.19	Forkhead box protein E3
Q5T6X5	GPC6A_HUMAN	0.35	G-protein coupled receptor family C group 6 mem
P28329	CLAT_HUMAN	4.77	Choline O-acetyltransferase
P33260	CP2CI_HUMAN	0	Cytochrome P450 2C18
Q14699	RFTN1_HUMAN	3.35	Raftlin
Q09013	DMPK_HUMAN	2.54	Myotonin-protein kinase
Q96EG3	ZN837_HUMAN	3.32	Zinc finger protein 837
Q17RY0	CPEB4_HUMAN	4.47	Cytoplasmic polyadenylation element-binding pro
Q16670	ZSC26_HUMAN	0.18	Zinc finger and SCAN domain-containing protein
Q9UHV2	SRTD1_HUMAN	-0.13	SERTA domain-containing protein 1
P35612	ADDB_HUMAN	0.77	Beta-adducin
Q8TDZ2	MICA1_HUMAN	2.21	Protein-methionine sulfoxide oxidase MICAL1
A0A096LNS6	A0A096LNS6_HUMAN	3.06	Uncharacterized protein
Q8IYX3	CC116_HUMAN	2.39	Coiled-coil domain-containing protein 116
Q7Z3C6	ATG9A_HUMAN	3.63	Autophagy-related protein 9A
Q8N3T6	T132C_HUMAN	1.43	Transmembrane protein 132C
Q9NXV2	KCTD5_HUMAN	0.15	BTB/POZ domain-containing protein KCTD5
Q9Y608	LRRF2_HUMAN	1.42	Leucine-rich repeat flightless-interacting prot
Q8WV16	DCAF4_HUMAN	2.45	DDB1- and CUL4-associated factor 4
Q96DX8	RTP4_HUMAN	-0.22	Receptor-transporting protein 4
O60503	ADCY9_HUMAN	1.91	Adenylate cyclase type 9
Q0D2I5	IFFO1_HUMAN	3.61	Intermediate filament family orphan 1
P55291	CAD15_HUMAN	1.07	Cadherin-15
Q6ZS17	FA65A_HUMAN	3.14	Protein FAM65A
P35680	HNF1B_HUMAN	1.6	Hepatocyte nuclear factor 1-beta
Q9NVL8	CN105_HUMAN	0.89	Uncharacterized protein C14orf105
Q86X51	CX067_HUMAN	2.71	Uncharacterized protein CXorf67
O14905	WNT9B_HUMAN	1.01	Protein Wnt-9b
Q96NN9	AIFM3_HUMAN	0.24	Apoptosis-inducing factor 3
Q8NGJ4	O52E2_HUMAN	-0.73	Olfactory receptor 52E2
O00204	ST2B1_HUMAN	1.32	Sulfotransferase family cytosolic 2B member 1
Q6P4F1	FUT10_HUMAN	-0.58	Alpha-(1,3)-fucosyltransferase 10
Q8IUB2	WFDC3_HUMAN	1.04	WAP four-disulfide core domain protein 3
Q96MG2	JSPR1_HUMAN	1.53	Junctional sarcoplasmic reticulum protein 1
Q9NZI7	UBIP1_HUMAN	2.67	Upstream-binding protein 1
Q9Y5S1	TRPV2_HUMAN	0.82	Transient receptor potential cation channel sub
Q5T1C6	THEM4_HUMAN	-0.33	Acyl-coenzyme A thioesterase THEM4
O95751	LDOC1_HUMAN	0.62	Protein LDOC1
Q96K17	BT3L4_HUMAN	0.36	Transcription factor BTF3 homolog 4
Q6NXR0	IIGP5_HUMAN	0.63	Interferon-inducible GTPase 5
Q9GZM6	OR8D2_HUMAN	-0.56	Olfactory receptor 8D2
Q2TAM9	TUSC1_HUMAN	3.9	Tumor suppressor candidate gene 1 protein
Q9Y4K0	LOXL2_HUMAN	1.93	Lysyl oxidase homolog 2
Q8WWI5	CTL1_HUMAN	0.99	Choline transporter-like protein 1
P19961	AMY2B_HUMAN	2.18	Alpha-amylase 2B
A8K4G0	CLM7_HUMAN	-0.08	CMRF35-like molecule 7
Q7Z5V6	PPR32_HUMAN	2.17	Protein phosphatase 1 regulatory subunit 32
O15072	ATS3_HUMAN	4.81	A disintegrin and metalloproteinase with thrombo
Q6ZU35	K1211_HUMAN	1.43	Uncharacterized protein KIAA1211
Q96JQ0	PCD16_HUMAN	2.76	Protocadherin-16
O00337	S28A1_HUMAN	-0.3	Sodium/nucleoside cotransporter 1
P52799	EFNB2_HUMAN	1.36	Ephrin-B2
Q8N8R7	AL14E_HUMAN	0.54	ARL14 effector protein
Q8N2W9	PIAS4_HUMAN	1.98	E3 SUMO-protein ligase PIAS4
Q9UHM6	OPN4_HUMAN	0.42	Melanopsin
Q96I99	SUCB2_HUMAN	-0.78	Succinate--CoA ligase [GDP-forming] subunit bet
Q13323	BIK_HUMAN	-0.97	Bcl-2-interacting killer
Q9UFP1	F198A_HUMAN	-0.2	Protein FAM198A
O95453	PARN_HUMAN	1.3	Poly(A)-specific ribonuclease PARN
Q15528	MED22_HUMAN	0.7	Mediator of RNA polymerase II transcription sub
Q587J7	TDR12_HUMAN	1.54	Putative ATP-dependent RNA helicase TDRD12
Q9UK85	DKKL1_HUMAN	-1.06	Dickkopf-like protein 1
Q6ZQX7	LIAT1_HUMAN	1.84	Protein LIAT1
Q6GMV3	PTRD1_HUMAN	-1.16	Putative peptidyl-tRNA hydrolase PTRHD1
Q9NZQ0	DJC27_HUMAN	0.18	DnaJ homolog subfamily C member 27
Q68CZ6	HAUS3_HUMAN	1.01	HAUS augmin-like complex subunit 3
Q9H2A7	CXL16_HUMAN	0.05	C-X-C motif chemokine 16
Q8N0V4	LGI2_HUMAN	-0.3	Leucine-rich repeat LGI family member 2
A2A3K4	PTPC1_HUMAN	1.56	Protein tyrosine phosphatase domain-containing
P08727	K1C19_HUMAN	4.24	Keratin, type I cytoskeletal 19
Q9P016	THYN1_HUMAN	-1.47	Thymocyte nuclear protein 1
P06753	TPM3_HUMAN	-1.85	Tropomyosin alpha-3 chain
P06276	CHLE_HUMAN	0.02	Cholinesterase
Q9NZH7	IL36B_HUMAN	-0.08	Interleukin-36 beta
Q9UIL4	KIF25_HUMAN	1.32	Kinesin-like protein KIF25
Q96L34	MARK4_HUMAN	3.71	MAP/microtubule affinity-regulating kinase 4
Q8NHS9	SPT22_HUMAN	1.99	Spermatogenesis-associated protein 22
Q6P1Q0	LTMD1_HUMAN	-0.16	LETM1 domain-containing protein 1
H0Y980	H0Y980_HUMAN	0.25	Uncharacterized protein (Fragment)
Q9NRA8	4ET_HUMAN	1.55	Eukaryotic translation initiation factor 4E trans
Q6IF99	O10K2_HUMAN	-0.53	Olfactory receptor 10K2
Q9Y227	ENTP4_HUMAN	0.66	Ectonucleoside triphosphate diphosphohydrolase
Q9H2U2	IPYR2_HUMAN	0.39	Inorganic pyrophosphatase 2, mitochondrial
P24592	IBP6_HUMAN	0.99	Insulin-like growth factor-binding protein 6
O00180	KCNK1_HUMAN	-0.54	Potassium channel subfamily K member 1
A1XBS5	F92A1_HUMAN	-1.02	Protein FAM92A1
Q13888	TF2H2_HUMAN	-0.43	General transcription factor IIH subunit 2
Q12841	FSTL1_HUMAN	0.73	Follistatin-related protein 1
A8MVW0	F1712_HUMAN	4.53	Protein FAM171A2
Q15078	CD5R1_HUMAN	-0.74	Cyclin-dependent kinase 5 activator 1
Q96LZ3	CANB2_HUMAN	-0.94	Calcineurin subunit B type 2
Q8TDI8	TMC1_HUMAN	0.48	Transmembrane channel-like protein 1
Q6PF04	ZN613_HUMAN	1.06	Zinc finger protein 613
Q86UE3	ZN546_HUMAN	-0.05	Zinc finger protein 546
O15399	NMDE4_HUMAN	3.24	Glutamate receptor ionotropic, NMDA 2D
Q9NQR1	KMT5A_HUMAN	1.73	N-lysine methyltransferase KMT5A
P46095	GPR6_HUMAN	0.11	G-protein coupled receptor 6
Q92670	ZN75C_HUMAN	0.6	Putative zinc finger protein 75C
O75365	TP4A3_HUMAN	-0.4	Protein tyrosine phosphatase type IVA 3
Q96DW6	S2538_HUMAN	-0.52	Solute carrier family 25 member 38
O75783	RHBL1_HUMAN	0.79	Rhomboid-related protein 1
Q86WR7	PRSR2_HUMAN	2.53	Proline and serine-rich protein 2
Q16696	CP2AD_HUMAN	0.92	Cytochrome P450 2A13
P22894	MMP8_HUMAN	2.09	Neutrophil collagenase
Q9GZN0	GPR88_HUMAN	-0.8	Probable G-protein coupled receptor 88
Q674R7	ATG9B_HUMAN	3.25	Autophagy-related protein 9B
P29475	NOS1_HUMAN	1.39	Nitric oxide synthase, brain
Q9UJ42	GP160_HUMAN	-1.24	Probable G-protein coupled receptor 160
P08590	MYL3_HUMAN	0.32	Myosin light chain 3
Q7Z5H3	RHG22_HUMAN	2.89	Rho GTPase-activating protein 22
Q8IUX8	EGFL6_HUMAN	2.67	Epidermal growth factor-like protein 6
Q14541	HNF4G_HUMAN	0.8	Hepatocyte nuclear factor 4-gamma
Q8N7X1	RMXL3_HUMAN	6.37	RNA-binding motif protein, X-linked-like-3
P50219	MNX1_HUMAN	4.05	Motor neuron and pancreas homeobox protein 1
Q9H672	ASB7_HUMAN	-0.42	Ankyrin repeat and SOCS box protein 7
Q68EN5	K895L_HUMAN	1.68	Uncharacterized protein KIAA0895-like
Q96EV8	DTBP1_HUMAN	0.46	Dysbindin
Q9NZ09	UBAP1_HUMAN	1.25	Ubiquitin-associated protein 1
Q7KYR7	BT2A1_HUMAN	0.81	Butyrophilin subfamily 2 member A1
P0CI26	TR49C_HUMAN	1.63	Tripartite motif-containing protein 49C
P35658	NU214_HUMAN	7.49	Nuclear pore complex protein Nup214
Q8N961	ABTB2_HUMAN	2.18	Ankyrin repeat and BTB/POZ domain-containing pr
Q13588	GRAP_HUMAN	-1.02	GRB2-related adapter protein
Q6UW02	CP20A_HUMAN	0.08	Cytochrome P450 20A1
O00206	TLR4_HUMAN	-0.56	Toll-like receptor 4
Q6NYC8	PPR18_HUMAN	2.44	Phostensin
Q496H8	NRN1L_HUMAN	-0.29	Neuritin-like protein
F6X3S4	F6X3S4_HUMAN	-0.15	Uncharacterized protein
Q6ZNG1	ZN600_HUMAN	0.57	Zinc finger protein 600
Q9NV56	MRGBP_HUMAN	1.64	MRG/MORF4L-binding protein
Q9HC62	SENP2_HUMAN	1.42	Sentrin-specific protease 2
Q8IWU5	SULF2_HUMAN	2.36	Extracellular sulfatase Sulf-2
Q9BZM2	PA2GF_HUMAN	1.46	Group IIF secretory phospholipase A2
Q96B02	UBE2W_HUMAN	-0.34	Ubiquitin-conjugating enzyme E2 W
P26640	SYVC_HUMAN	2.46	Valine--tRNA ligase
Q9BYT9	ANO3_HUMAN	-0.05	Anoctamin-3
Q6ZNB6	NFXL1_HUMAN	2.94	NF-X1-type zinc finger protein NFXL1
Q6ZMT9	DTHD1_HUMAN	-0.13	Death domain-containing protein 1
O15061	SYNEM_HUMAN	2.12	Synemin
Q86UW5	Q86UW5_HUMAN	1.23	Putative uncharacterized protein HSPC047
Q8WZA2	RPGF4_HUMAN	0.25	Rap guanine nucleotide exchange factor 4
Q7Z7H5	TMED4_HUMAN	0.19	Transmembrane emp24 domain-containing protein 4
P08238	HS90B_HUMAN	0.66	Heat shock protein HSP 90-beta
Q96E14	RMI2_HUMAN	0.01	RecQ-mediated genome instability protein 2
P0C7N4	T191B_HUMAN	1.43	Transmembrane protein 191B
Q8NI60	ADCK3_HUMAN	2.41	Atypical kinase ADCK3, mitochondrial
Q8NBP5	MFSD9_HUMAN	-0.23	Major facilitator superfamily domain-containing
Q86WR0	CCD25_HUMAN	-0.08	Coiled-coil domain-containing protein 25
Q8NDD1	CA131_HUMAN	0.25	Uncharacterized protein C1orf131
Q9NPG2	NGB_HUMAN	-1.62	Neuroglobin
Q969P5	FBX32_HUMAN	0.26	F-box only protein 32
Q99687	MEIS3_HUMAN	1.78	Homeobox protein Meis3
Q6ZMC9	SIG15_HUMAN	0.04	Sialic acid-binding Ig-like lectin 15
Q8WYR1	PI3R5_HUMAN	1.97	Phosphoinositide 3-kinase regulatory subunit 5
P48029	SC6A8_HUMAN	0.98	Sodium- and chloride-dependent creatine transpo
Q9HBI0	PARVG_HUMAN	-1.1	Gamma-parvin
Q6IPM2	IQCE_HUMAN	2.18	IQ domain-containing protein E
Q13153	PAK1_HUMAN	1.13	Serine/threonine-protein kinase PAK 1
Q9HCG7	GBA2_HUMAN	0.96	Non-lysosomal glucosylceramidase
P54762	EPHB1_HUMAN	1.4	Ephrin type-B receptor 1
Q64LD2	WDR25_HUMAN	0.72	WD repeat-containing protein 25
Q9H095	IQCG_HUMAN	0.09	IQ domain-containing protein G
Q8NGC5	OR6J1_HUMAN	-0.4	Olfactory receptor 6J1
A0A1B0GW35	A0A1B0GW35_HUMAN	-1.59	HCG2040572
P54105	ICLN_HUMAN	0.64	Methylosome subunit pICln
Q8TBP0	TBC16_HUMAN	2.03	TBC1 domain family member 16
Q9Y3C5	RNF11_HUMAN	0.23	RING finger protein 11
P43119	PI2R_HUMAN	0.43	Prostacyclin receptor
Q9C098	DCLK3_HUMAN	1.86	Serine/threonine-protein kinase DCLK3
Q9H9A6	LRC40_HUMAN	-0.1	Leucine-rich repeat-containing protein 40
Q9Y5I7	CLD16_HUMAN	-0.1	Claudin-16
O43795	MYO1B_HUMAN	0.31	Unconventional myosin-Ib
A6NC51	T150B_HUMAN	0.87	Transmembrane protein 150B
Q96NB3	ZN830_HUMAN	0.32	Zinc finger protein 830
P43366	MAGB1_HUMAN	0.57	Melanoma-associated antigen B1
P31749	AKT1_HUMAN	0.29	RAC-alpha serine/threonine-protein kinase
O00329	PK3CD_HUMAN	0.9	Phosphatidylinositol 4,5-bisphosphate 3-kinase
Q96PE2	ARHGH_HUMAN	4.44	Rho guanine nucleotide exchange factor 17
Q502W7	CCD38_HUMAN	0.65	Coiled-coil domain-containing protein 38
P53985	MOT1_HUMAN	0.12	Monocarboxylate transporter 1
Q6ZMN8	CCNI2_HUMAN	2.98	Cyclin-I2
P31350	RIR2_HUMAN	0.93	Ribonucleoside-diphosphate reductase subunit M2
A8MVW5	HECA2_HUMAN	0.61	HEPACAM family member 2
Q9Y2D2	S35A3_HUMAN	-0.15	UDP-N-acetylglucosamine transporter
P00439	PH4H_HUMAN	-0.73	Phenylalanine-4-hydroxylase
Q15067	ACOX1_HUMAN	0.49	Peroxisomal acyl-coenzyme A oxidase 1
A0A1B0GVN3	A0A1B0GVN3_HUMAN	0.39	Protein LINC01125
O60830	TI17B_HUMAN	1.41	Mitochondrial import inner membrane translocase
Q8NGD0	OR4M1_HUMAN	-0.29	Olfactory receptor 4M1
Q9UHQ9	NB5R1_HUMAN	-0.17	NADH-cytochrome b5 reductase 1
P54868	HMCS2_HUMAN	1.37	Hydroxymethylglutaryl-CoA synthase, mitochondri
Q86VD1	MORC1_HUMAN	0.44	MORC family CW-type zinc finger protein 1
O14763	TR10B_HUMAN	1.28	Tumor necrosis factor receptor superfamily memb
P41214	EIF2D_HUMAN	-0.16	Eukaryotic translation initiation factor 2D
Q5F1R6	DJC21_HUMAN	0.7	DnaJ homolog subfamily C member 21
Q9NW07	ZN358_HUMAN	4.01	Zinc finger protein 358
Q9H0R5	GBP3_HUMAN	0	Guanylate-binding protein 3
Q86UD7	TBC26_HUMAN	-0.06	TBC1 domain family member 26
Q9NX62	IMPA3_HUMAN	1.71	Inositol monophosphatase 3
Q96FV0	LRC46_HUMAN	2.42	Leucine-rich repeat-containing protein 46
Q86U44	MTA70_HUMAN	0.65	N6-adenosine-methyltransferase 70 kDa subunit
Q96FT7	ASIC4_HUMAN	0.88	Acid-sensing ion channel 4
Q9NWF4	S52A1_HUMAN	1.2	Solute carrier family 52, riboflavin transporte
Q5T0L3	CA111_HUMAN	0.34	Uncharacterized protein C1orf111
O75473	LGR5_HUMAN	0.46	Leucine-rich repeat-containing G-protein coupled
P05997	CO5A2_HUMAN	7.33	Collagen alpha-2(V) chain
A6NI47	POTEM_HUMAN	4.07	Putative POTE ankyrin domain family member M
P10809	CH60_HUMAN	0.19	60 kDa heat shock protein, mitochondrial
Q96C28	ZN707_HUMAN	0.36	Zinc finger protein 707
Q8NA66	CNBD1_HUMAN	-0.25	Cyclic nucleotide-binding domain-containing pro
Q6ZQY2	LR74B_HUMAN	0.23	Leucine-rich repeat-containing protein 74B
Q99676	ZN184_HUMAN	0.61	Zinc finger protein 184
Q9NPE2	NGRN_HUMAN	1.13	Neugrin
P46527	CDN1B_HUMAN	1.86	Cyclin-dependent kinase inhibitor 1B
O43688	PLPP2_HUMAN	-0.51	Phospholipid phosphatase 2
P30990	NEUT_HUMAN	-1.4	Neurotensin/neuromedin N
O95822	DCMC_HUMAN	0.26	Malonyl-CoA decarboxylase, mitochondrial
Q6UWW0	LCN15_HUMAN	0.14	Lipocalin-15
Q8ND94	LRN4L_HUMAN	0.46	LRRN4 C-terminal-like protein
Q8TF61	FBX41_HUMAN	4.47	F-box only protein 41
Q6PJ21	SPSB3_HUMAN	1.24	SPRY domain-containing SOCS box protein 3
Q9GZV7	HPLN2_HUMAN	2.31	Hyaluronan and proteoglycan link protein 2
Q02161	RHD_HUMAN	-0.39	Blood group Rh(D) polypeptide
Q86XR8	CEP57_HUMAN	4.51	Centrosomal protein of 57 kDa
Q12851	M4K2_HUMAN	1.31	Mitogen-activated protein kinase kinase kinase k
Q8N9Q2	SR1IP_HUMAN	0.32	Protein SREK1IP1
Q00266	METK1_HUMAN	1.14	S-adenosylmethionine synthase isoform type-1
Q9H8W5	TRI45_HUMAN	3.5	Tripartite motif-containing protein 45
Q8N7U9	CQ054_HUMAN	-1.3	Putative uncharacterized protein encoded by LIN
P25874	UCP1_HUMAN	-0.23	Mitochondrial brown fat uncoupling protein 1
Q9NRM7	LATS2_HUMAN	3.93	Serine/threonine-protein kinase LATS2
Q5GLZ8	HERC4_HUMAN	3.26	Probable E3 ubiquitin-protein ligase HERC4
Q96RC9	OR8B4_HUMAN	0.48	Olfactory receptor 8B4
Q5TA31	RN187_HUMAN	1.05	E3 ubiquitin-protein ligase RNF187
P53990	IST1_HUMAN	2.7	IST1 homolog
O14975	S27A2_HUMAN	-0.23	Very long-chain acyl-CoA synthetase
Q86UQ0	ZN589_HUMAN	1.67	Zinc finger protein 589
Q9H106	SIRPD_HUMAN	-0.23	Signal-regulatory protein delta
Q9NUK0	MBNL3_HUMAN	0.39	Muscleblind-like protein 3
P08172	ACM2_HUMAN	0.23	Muscarinic acetylcholine receptor M2
O75477	ERLN1_HUMAN	0.41	Erlin-1
Q07960	RHG01_HUMAN	-0.53	Rho GTPase-activating protein 1
Q9NP92	RT30_HUMAN	1.28	28S ribosomal protein S30, mitochondrial
O75952	CABYR_HUMAN	0.95	Calcium-binding tyrosine phosphorylation-regula
P34925	RYK_HUMAN	-0.33	Tyrosine-protein kinase RYK
Q13233	M3K1_HUMAN	2.85	Mitogen-activated protein kinase kinase kinase 1
Q9BT25	HAUS8_HUMAN	2.76	HAUS augmin-like complex subunit 8
O15544	GR6_HUMAN	0.42	Protein GR6
Q9NTI7	F212B_HUMAN	2.91	Protein FAM212B
P55103	INHBC_HUMAN	0.64	Inhibin beta C chain
Q9UFH2	DYH17_HUMAN	1.05	Dynein heavy chain 17, axonemal
Q5JTZ5	CI152_HUMAN	0.69	Uncharacterized protein C9orf152
Q9UNH7	SNX6_HUMAN	-0.56	Sorting nexin-6
Q9ULD5	ZN777_HUMAN	1.62	Zinc finger protein 777
Q8N4G2	ARL14_HUMAN	0.6	ADP-ribosylation factor-like protein 14
Q12972	PP1R8_HUMAN	2.34	Nuclear inhibitor of protein phosphatase 1
Q92954	PRG4_HUMAN	2.82	Proteoglycan 4
P05108	CP11A_HUMAN	0.14	Cholesterol side-chain cleavage enzyme, mitocho
Q5JSP0	FGD3_HUMAN	2.2	FYVE, RhoGEF and PH domain-containing protein 3
O00144	FZD9_HUMAN	1.6	Frizzled-9
Q7Z3Z0	K1C25_HUMAN	6.02	Keratin, type I cytoskeletal 25
Q96MZ4	F218A_HUMAN	1.2	Protein FAM218A
I6L899	GOG8R_HUMAN	3.73	Golgin subfamily A member 8R
P0DJR0	GIMD1_HUMAN	-1.17	GTPase IMAP family member GIMD1
Q15907	RB11B_HUMAN	-0.32	Ras-related protein Rab-11B
P08922	ROS1_HUMAN	0.98	Proto-oncogene tyrosine-protein kinase ROS
Q6ZVU0	YK022_HUMAN	0.2	Putative uncharacterized protein FLJ42102
P15692	VEGFA_HUMAN	1.07	Vascular endothelial growth factor A
Q9Y6N6	LAMC3_HUMAN	4.48	Laminin subunit gamma-3
Q01658	NC2B_HUMAN	-0.12	Protein Dr1
P20290	BTF3_HUMAN	-0.06	Transcription factor BTF3
P57057	G6PT2_HUMAN	0.01	Glucose-6-phosphate exchanger SLC37A1
Q2MV58	TECT1_HUMAN	1.29	Tectonic-1
Q86YJ7	AN13B_HUMAN	2.75	Ankyrin repeat domain-containing protein 13B
O94916	NFAT5_HUMAN	2.02	Nuclear factor of activated T-cells 5
Q86U90	YRDC_HUMAN	1.37	YrdC domain-containing protein, mitochondrial
Q8IZF7	AGRF2_HUMAN	1	Adhesion G-protein coupled receptor F2
Q86YC2	PALB2_HUMAN	1.2	Partner and localizer of BRCA2
Q8N766	EMC1_HUMAN	0.09	ER membrane protein complex subunit 1
P17023	ZNF19_HUMAN	0.68	Zinc finger protein 19
A6NKC0	F90A7_HUMAN	2.32	Putative protein FAM90A7P
O15550	KDM6A_HUMAN	2.2	Lysine-specific demethylase 6A
Q8TER5	ARH40_HUMAN	3.02	Rho guanine nucleotide exchange factor 40
O75330	HMMR_HUMAN	0.81	Hyaluronan mediated motility receptor
Q7RTX1	TS1R1_HUMAN	0.06	Taste receptor type 1 member 1
Q9NVV0	TM38B_HUMAN	-0.97	Trimeric intracellular cation channel type B
P11086	PNMT_HUMAN	0.83	Phenylethanolamine N-methyltransferase
Q9BXX3	AN30A_HUMAN	-0.32	Ankyrin repeat domain-containing protein 30A
O94964	SOGA1_HUMAN	2.15	Protein SOGA1
O95714	HERC2_HUMAN	2.17	E3 ubiquitin-protein ligase HERC2
Q8NEF9	SRFB1_HUMAN	-0.08	Serum response factor-binding protein 1
Q14534	ERG1_HUMAN	0.39	Squalene monooxygenase
P14678	RSMB_HUMAN	3.56	Small nuclear ribonucleoprotein-associated prote
P55008	AIF1_HUMAN	0.94	Allograft inflammatory factor 1
Q68G75	LEMD1_HUMAN	-0.24	LEM domain-containing protein 1
Q6ZRP0	PR23C_HUMAN	1.04	Proline-rich protein 23C
P57058	HUNK_HUMAN	2.2	Hormonally up-regulated neu tumor-associated kin
Q96FZ7	CHMP6_HUMAN	-1.79	Charged multivesicular body protein 6
Q96M98	PACRG_HUMAN	0.96	Parkin coregulated gene protein
P43361	MAGA8_HUMAN	1.32	Melanoma-associated antigen 8
O15040	TCPR2_HUMAN	1.35	Tectonin beta-propeller repeat-containing prote
P42025	ACTY_HUMAN	1.33	Beta-centractin
P20851	C4BPB_HUMAN	1.89	C4b-binding protein beta chain
P07900	HS90A_HUMAN	0.9	Heat shock protein HSP 90-alpha
Q99595	TI17A_HUMAN	1.4	Mitochondrial import inner membrane translocase
P16581	LYAM2_HUMAN	1.73	E-selectin
Q9H0N0	RAB6C_HUMAN	1.42	Ras-related protein Rab-6C
Q9Y586	MB212_HUMAN	-0.31	Protein mab-21-like 2
Q8TBY8	PMFBP_HUMAN	-0.48	Polyamine-modulated factor 1-binding protein 1
Q9BQA5	HINFP_HUMAN	-0.36	Histone H4 transcription factor
P28300	LYOX_HUMAN	3.32	Protein-lysine 6-oxidase
Q9Y5F2	PCDBB_HUMAN	0.74	Protocadherin beta-11
Q4G0T1	SRCRM_HUMAN	1.86	Scavenger receptor cysteine-rich domain-contain
Q9UGF6	OR5V1_HUMAN	-0.74	Olfactory receptor 5V1
Q12974	TP4A2_HUMAN	-0.47	Protein tyrosine phosphatase type IVA 2
Q9Y5H9	PCDA2_HUMAN	2.13	Protocadherin alpha-2
Q92504	S39A7_HUMAN	5.21	Zinc transporter SLC39A7
Q8NB66	UN13C_HUMAN	1.47	Protein unc-13 homolog C
O43660	PLRG1_HUMAN	0.34	Pleiotropic regulator 1
Q9NZD2	GLTP_HUMAN	-0.56	Glycolipid transfer protein
Q9BYV6	TRI55_HUMAN	1.94	Tripartite motif-containing protein 55
Q8N162	OR8H2_HUMAN	-0.89	Olfactory receptor 8H2
G5E9R7	G5E9R7_HUMAN	4.58	HCG2042993
Q16739	CEGT_HUMAN	-1.21	Ceramide glucosyltransferase
Q8IUZ0	LRC49_HUMAN	1.18	Leucine-rich repeat-containing protein 49
P33076	C2TA_HUMAN	1.62	MHC class II transactivator
Q92959	SO2A1_HUMAN	0.66	Solute carrier organic anion transporter family
P11474	ERR1_HUMAN	1.09	Steroid hormone receptor ERR1
Q8N1Q1	CAH13_HUMAN	1.49	Carbonic anhydrase 13
P17612	KAPCA_HUMAN	-0.82	cAMP-dependent protein kinase catalytic subunit
Q9BY41	HDAC8_HUMAN	0.9	Histone deacetylase 8
Q8NH69	OR5W2_HUMAN	-0.88	Olfactory receptor 5W2
P0DMU3	F231L_HUMAN	-0.18	FAM231A/C-like protein LOC102723383
Q6PI77	BHLH9_HUMAN	1.15	Protein BHLHb9
Q9Y5T4	DJC15_HUMAN	-0.46	DnaJ homolog subfamily C member 15
Q8NEP7	KLDC9_HUMAN	1.48	Kelch domain-containing protein 9
A4QMS7	CE049_HUMAN	-0.67	Uncharacterized protein C5orf49
Q16518	RPE65_HUMAN	0.03	Retinoid isomerohydrolase
Q9UJL9	ZF69B_HUMAN	0.27	Zinc finger protein ZFP69B
P07437	TBB5_HUMAN	0.92	Tubulin beta chain
P12956	XRCC6_HUMAN	0.88	X-ray repair cross-complementing protein 6
Q5T4F4	ZFY27_HUMAN	1.84	Protrudin
O76062	ERG24_HUMAN	0.07	Delta(14)-sterol reductase
Q7Z4Q2	HEAT3_HUMAN	0.1	HEAT repeat-containing protein 3
Q9NRW4	DUS22_HUMAN	-1.08	Dual specificity protein phosphatase 22
Q6IAN0	DRS7B_HUMAN	-0.44	Dehydrogenase/reductase SDR family member 7B
O43763	TLX2_HUMAN	5.19	T-cell leukemia homeobox protein 2
Q86V59	PNML1_HUMAN	0.38	PNMA-like protein 1
Q9P0V9	SEP10_HUMAN	-0.23	Septin-10
O43298	ZBT43_HUMAN	-0.08	Zinc finger and BTB domain-containing protein 4
Q02410	APBA1_HUMAN	1.43	Amyloid beta A4 precursor protein-binding famil
P33992	MCM5_HUMAN	0.42	DNA replication licensing factor MCM5
Q7LBR1	CHM1B_HUMAN	-1.73	Charged multivesicular body protein 1b
P13688	CEAM1_HUMAN	1.52	Carcinoembryonic antigen-related cell adhesion
Q96DD7	SHSA4_HUMAN	2.31	Protein shisa-4
Q96B21	TM45B_HUMAN	-0.99	Transmembrane protein 45B
Q96NX5	KCC1G_HUMAN	0.34	Calcium/calmodulin-dependent protein kinase typ
Q9HCI6	K1586_HUMAN	0.66	E3 SUMO-protein ligase KIAA1586
Q6YHU6	THADA_HUMAN	0.18	Thyroid adenoma-associated protein
Q6ZRR5	TM136_HUMAN	-0.37	Transmembrane protein 136
O75386	TULP3_HUMAN	0.81	Tubby-related protein 3
F8WBI6	GOG8N_HUMAN	4.02	Golgin subfamily A member 8N
Q15582	BGH3_HUMAN	0.54	Transforming growth factor-beta-induced protein
Q96RD9	FCRL5_HUMAN	1.56	Fc receptor-like protein 5
Q86SR1	GLT10_HUMAN	1.25	Polypeptide N-acetylgalactosaminyltransferase 1
Q5VZK9	CARL1_HUMAN	1.62	F-actin-uncapping protein LRRC16A
O60518	RNBP6_HUMAN	0.28	Ran-binding protein 6
P57060	RWD2B_HUMAN	0.45	RWD domain-containing protein 2B
Q5SZI1	LRAD2_HUMAN	4.02	Low-density lipoprotein receptor class A domain
Q96IJ6	GMPPA_HUMAN	0.04	Mannose-1-phosphate guanyltransferase alpha
Q02742	GCNT1_HUMAN	0.42	Beta-1,3-galactosyl-O-glycosyl-glycoprotein bet
Q5VSY0	GKAP1_HUMAN	0.33	G kinase-anchoring protein 1
Q0VF96	CGNL1_HUMAN	1.75	Cingulin-like protein 1
Q9BYD3	RM04_HUMAN	1	39S ribosomal protein L4, mitochondrial
O95490	AGRL2_HUMAN	1.35	Adhesion G protein-coupled receptor L2
Q86UA1	PRP39_HUMAN	0.89	Pre-mRNA-processing factor 39
Q49MG5	MAP9_HUMAN	0.43	Microtubule-associated protein 9
Q9Y6N3	CLCA3_HUMAN	0.21	Calcium-activated chloride channel regulator fa
Q8WV48	CC107_HUMAN	2.69	Coiled-coil domain-containing protein 107
Q5TF21	SOGA3_HUMAN	6.66	Protein SOGA3
Q9Y3Q0	NALD2_HUMAN	0.89	N-acetylated-alpha-linked acidic dipeptidase 2
Q86SG7	LYG2_HUMAN	-0.29	Lysozyme g-like protein 2
Q8TEB7	RN128_HUMAN	0.72	E3 ubiquitin-protein ligase RNF128
Q96PZ0	PUS7_HUMAN	1.43	Pseudouridylate synthase 7 homolog
P62826	RAN_HUMAN	0.18	GTP-binding nuclear protein Ran
Q9NPD8	UBE2T_HUMAN	-0.45	Ubiquitin-conjugating enzyme E2 T
Q9UM63	PLAL1_HUMAN	0.78	Zinc finger protein PLAGL1
O95998	I18BP_HUMAN	-0.51	Interleukin-18-binding protein
Q03393	PTPS_HUMAN	-0.22	6-pyruvoyl tetrahydrobiopterin synthase
Q9NPJ1	MKKS_HUMAN	0.48	McKusick-Kaufman/Bardet-Biedl syndromes putative
Q9NWZ3	IRAK4_HUMAN	0.02	Interleukin-1 receptor-associated kinase 4
Q12809	KCNH2_HUMAN	4.01	Potassium voltage-gated channel subfamily H mem
Q9BZ11	ADA33_HUMAN	2.15	Disintegrin and metalloproteinase domain-contai
Q9UDT6	CLIP2_HUMAN	1.17	CAP-Gly domain-containing linker protein 2
Q12952	FOXL1_HUMAN	3.36	Forkhead box protein L1
O00744	WN10B_HUMAN	1.18	Protein Wnt-10b
P41181	AQP2_HUMAN	-0.51	Aquaporin-2
P42773	CDN2C_HUMAN	-0.03	Cyclin-dependent kinase 4 inhibitor C
P36956	SRBP1_HUMAN	3.51	Sterol regulatory element-binding protein 1
Q9BYV2	TRI54_HUMAN	1.15	Tripartite motif-containing protein 54
Q9NX01	TXN4B_HUMAN	-1.03	Thioredoxin-like protein 4B
Q8NCI6	GLBL3_HUMAN	0.84	Beta-galactosidase-1-like protein 3
Q68EA5	ZNF57_HUMAN	0.68	Zinc finger protein 57
Q15910	EZH2_HUMAN	1.89	Histone-lysine N-methyltransferase EZH2
Q6ZMV9	KIF6_HUMAN	1.96	Kinesin-like protein KIF6
P15173	MYOG_HUMAN	4.24	Myogenin
Q15506	SP17_HUMAN	-1.24	Sperm surface protein Sp17
Q5T2Q4	CCYL2_HUMAN	-0.53	Cyclin-Y-like protein 2
P48551	INAR2_HUMAN	0.39	Interferon alpha/beta receptor 2
Q8TD84	DSCL1_HUMAN	2.14	Down syndrome cell adhesion molecule-like prote
Q96IP4	FA46A_HUMAN	7.19	Protein FAM46A
Q9UNK4	PA2GD_HUMAN	0.83	Group IID secretory phospholipase A2
Q9NUQ7	UFSP2_HUMAN	1.48	Ufm1-specific protease 2
Q8IWZ8	SUGP1_HUMAN	1.34	SURP and G-patch domain-containing protein 1
Q8WW27	ABEC4_HUMAN	0.05	Putative C->U-editing enzyme APOBEC-4
Q08345	DDR1_HUMAN	2.32	Epithelial discoidin domain-containing receptor
Q15825	ACHA6_HUMAN	-0.07	Neuronal acetylcholine receptor subunit alpha-6
P16615	AT2A2_HUMAN	1.17	Sarcoplasmic/endoplasmic reticulum calcium ATPa
Q969H6	POP5_HUMAN	-1.69	Ribonuclease P/MRP protein subunit POP5
Q9NZV7	ZIM2_HUMAN	2.11	Zinc finger imprinted 2
P26441	CNTF_HUMAN	-1.77	Ciliary neurotrophic factor
O95363	SYFM_HUMAN	-0.32	Phenylalanine--tRNA ligase, mitochondrial
Q9Y6K8	KAD5_HUMAN	1.14	Adenylate kinase isoenzyme 5
Q7L5L3	GDPD3_HUMAN	0.27	Glycerophosphodiester phosphodiesterase domain-
Q8TC12	RDH11_HUMAN	-0.95	Retinol dehydrogenase 11
Q9UNQ0	ABCG2_HUMAN	0.99	ATP-binding cassette sub-family G member 2
Q16181	SEPT7_HUMAN	0.89	Septin-7
Q0JRZ9	FCHO2_HUMAN	1.81	F-BAR domain only protein 2
A6NGJ6	TRI64_HUMAN	1.05	Tripartite motif-containing protein 64
P0C629	O10J4_HUMAN	-0.25	Olfactory receptor 10J4
Q16625	OCLN_HUMAN	3.68	Occludin
Q9H013	ADA19_HUMAN	4.2	Disintegrin and metalloproteinase domain-contai
Q14032	BAAT_HUMAN	0.85	Bile acid-CoA:amino acid N-acyltransferase
Q9NY74	ETAA1_HUMAN	1.18	Ewing's tumor-associated antigen 1
Q9NXI6	RN186_HUMAN	-0.96	RING finger protein 186
Q96T23	RSF1_HUMAN	1.71	Remodeling and spacing factor 1
P42356	PI4KA_HUMAN	1.94	Phosphatidylinositol 4-kinase alpha
P32238	CCKAR_HUMAN	1.38	Cholecystokinin receptor type A
Q00610	CLH1_HUMAN	0.3	Clathrin heavy chain 1
P53350	PLK1_HUMAN	1.03	Serine/threonine-protein kinase PLK1
P0CG01	GKN3_HUMAN	-0.21	Gastrokine-3
Q13263	TIF1B_HUMAN	3.3	Transcription intermediary factor 1-beta
Q969F0	FATE1_HUMAN	-0.75	Fetal and adult testis-expressed transcript pro
O95622	ADCY5_HUMAN	3.52	Adenylate cyclase type 5
Q8NGC3	O10G2_HUMAN	-0.56	Olfactory receptor 10G2
Q5VZB9	DMRTA_HUMAN	3.19	Doublesex- and mab-3-related transcription fact
P35637	FUS_HUMAN	13.96	RNA-binding protein FUS
Q9NS66	GP173_HUMAN	-0.62	Probable G-protein coupled receptor 173
Q96MN2	NALP4_HUMAN	-0.12	NACHT, LRR and PYD domains-containing protein 4
Q6PI48	SYDM_HUMAN	0.92	Aspartate--tRNA ligase, mitochondrial
Q5VV52	ZN691_HUMAN	2.73	Zinc finger protein 691
Q8N4C8	MINK1_HUMAN	2.87	Misshapen-like kinase 1
O14521	DHSD_HUMAN	-2.39	Succinate dehydrogenase [ubiquinone] cytochrome
Q8NH94	OR1L1_HUMAN	0.1	Olfactory receptor 1L1
P30626	SORCN_HUMAN	1.68	Sorcin
P55157	MTP_HUMAN	0.28	Microsomal triglyceride transfer protein large su
P12018	VPREB_HUMAN	0.55	Immunoglobulin iota chain
Q15072	OZF_HUMAN	-0.27	Zinc finger protein OZF
Q96AX1	VP33A_HUMAN	-0.06	Vacuolar protein sorting-associated protein 33A
O95948	ONEC2_HUMAN	3.58	One cut domain family member 2
P21810	PGS1_HUMAN	2.12	Biglycan
Q96A47	ISL2_HUMAN	2.13	Insulin gene enhancer protein ISL-2
Q86XK3	SFR1_HUMAN	0.6	Swi5-dependent recombination DNA repair protein
P02771	FETA_HUMAN	1.05	Alpha-fetoprotein
O00116	ADAS_HUMAN	0.18	Alkyldihydroxyacetonephosphate synthase, peroxis
Q9BRQ4	CK070_HUMAN	1.01	Uncharacterized protein C11orf70
Q9Y5P3	RAI2_HUMAN	1.85	Retinoic acid-induced protein 2
O95479	G6PE_HUMAN	0.92	GDH/6PGL endoplasmic bifunctional protein
Q86UK5	LBN_HUMAN	0.52	Limbin
O43353	RIPK2_HUMAN	1.69	Receptor-interacting serine/threonine-protein k
Q9Y294	ASF1A_HUMAN	-0.62	Histone chaperone ASF1A
Q15678	PTN14_HUMAN	0.81	Tyrosine-protein phosphatase non-receptor type
Q9HBY8	SGK2_HUMAN	2.4	Serine/threonine-protein kinase Sgk2
A8MUP2	MET12_HUMAN	1.35	Methyltransferase-like protein 12, mitochondria
Q16649	NFIL3_HUMAN	2.09	Nuclear factor interleukin-3-regulated protein
Q24JP5	T132A_HUMAN	2.05	Transmembrane protein 132A
Q8NHR7	TERB2_HUMAN	-0.16	Telomere repeats-binding bouquet formation prot
Q8N302	AGGF1_HUMAN	1.92	Angiogenic factor with G patch and FHA domains
Q9BYJ1	LOXE3_HUMAN	0.52	Hydroperoxide isomerase ALOXE3
Q9Y2F5	ICE1_HUMAN	2.53	Little elongation complex subunit 1
P46109	CRKL_HUMAN	1.01	Crk-like protein
Q99549	MPP8_HUMAN	0.47	M-phase phosphoprotein 8
Q8TCQ1	MARH1_HUMAN	-0.05	E3 ubiquitin-protein ligase MARCH1
Q14863	PO6F1_HUMAN	0.22	POU domain, class 6, transcription factor 1
Q9P2K6	KLH42_HUMAN	0.74	Kelch-like protein 42
A0A087X1G2	TBC3K_HUMAN	3.05	TBC1 domain family member 3K
P10745	RET3_HUMAN	1.12	Retinol-binding protein 3
Q96NX9	DACH2_HUMAN	5.32	Dachshund homolog 2
Q13561	DCTN2_HUMAN	0.73	Dynactin subunit 2
Q86W25	NAL13_HUMAN	-0.59	NACHT, LRR and PYD domains-containing protein 1
Q9NW75	GPTC2_HUMAN	0.95	G patch domain-containing protein 2
Q96PB8	LRC3B_HUMAN	-0.97	Leucine-rich repeat-containing protein 3B
O43497	CAC1G_HUMAN	3.31	Voltage-dependent T-type calcium channel subuni
M0R296	M0R296_HUMAN	-0.18	Uncharacterized protein (Fragment)
Q9NNW5	WDR6_HUMAN	2.2	WD repeat-containing protein 6
O95744	PM2P2_HUMAN	-0.66	Putative postmeiotic segregation increased 2-li
Q9NYS7	WSB2_HUMAN	0.26	WD repeat and SOCS box-containing protein 2
P41595	5HT2B_HUMAN	-0.35	5-hydroxytryptamine receptor 2B
Q9Y5H5	PCDA9_HUMAN	2.21	Protocadherin alpha-9
Q99684	GFI1_HUMAN	2.02	Zinc finger protein Gfi-1
P17024	ZNF20_HUMAN	0.25	Zinc finger protein 20
Q86YT9	JAML_HUMAN	0.36	Junctional adhesion molecule-like
Q9UBC2	EP15R_HUMAN	3.31	Epidermal growth factor receptor substrate 15-l
Q9P218	COKA1_HUMAN	3.07	Collagen alpha-1(XX) chain
O43681	ASNA_HUMAN	-0.28	ATPase ASNA1
Q86UD1	OAF_HUMAN	0.22	Out at first protein homolog
Q8TDM0	BCAS4_HUMAN	0.77	Breast carcinoma-amplified sequence 4
Q9NV66	TYW1_HUMAN	1.49	S-adenosyl-L-methionine-dependent tRNA 4-demethy
Q6ZS02	DMP46_HUMAN	-0.43	Putative GED domain-containing protein DNM1P46
Q8N7Y1	KIAS3_HUMAN	1.21	Putative uncharacterized protein KIRREL3-AS3
O94979	SC31A_HUMAN	3.15	Protein transport protein Sec31A
O14525	ASTN1_HUMAN	2.52	Astrotactin-1
Q8N128	F177A_HUMAN	0.06	Protein FAM177A1
P19224	UD16_HUMAN	0.48	UDP-glucuronosyltransferase 1-6
Q9HDB9	GAK5_HUMAN	1.1	Endogenous retrovirus group K member 5 Gag polyp
O95487	SC24B_HUMAN	4	Protein transport protein Sec24B
Q16534	HLF_HUMAN	1.63	Hepatic leukemia factor
O75674	TM1L1_HUMAN	0.57	TOM1-like protein 1
P34741	SDC2_HUMAN	0.37	Syndecan-2
Q15048	LRC14_HUMAN	0.68	Leucine-rich repeat-containing protein 14
O95466	FMNL1_HUMAN	4.08	Formin-like protein 1
Q6ZT52	FA43B_HUMAN	0.43	Protein FAM43B
Q9BY32	ITPA_HUMAN	0.32	Inosine triphosphate pyrophosphatase
Q2VPA4	CR1L_HUMAN	1.86	Complement component receptor 1-like protein
P13929	ENOB_HUMAN	-0.34	Beta-enolase
Q9NYA1	SPHK1_HUMAN	-0.11	Sphingosine kinase 1
Q8NGY5	OR6N1_HUMAN	-0.5	Olfactory receptor 6N1
Q96T66	NMNA3_HUMAN	-1.17	Nicotinamide/nicotinic acid mononucleotide aden
Q5HYW2	NHSL2_HUMAN	2.01	NHS-like protein 2
Q6UY11	DLK2_HUMAN	3.59	Protein delta homolog 2
Q9UKR5	ERG28_HUMAN	-1.24	Probable ergosterol biosynthetic protein 28
Q8WVM7	STAG1_HUMAN	1.41	Cohesin subunit SA-1
Q86V40	TIKI1_HUMAN	0.53	Metalloprotease TIKI1
Q5TCQ9	MAGI3_HUMAN	1.69	Membrane-associated guanylate kinase, WW and PD
Q8NGX8	OR6Y1_HUMAN	-0.69	Olfactory receptor 6Y1
P21589	5NTD_HUMAN	1.54	5'-nucleotidase
Q9Y2F9	BTBD3_HUMAN	0.53	BTB/POZ domain-containing protein 3
Q8NBF1	GLIS1_HUMAN	4.7	Zinc finger protein GLIS1
Q9UHL4	DPP2_HUMAN	1.37	Dipeptidyl peptidase 2
P49593	PPM1F_HUMAN	3.06	Protein phosphatase 1F
P26439	3BHS2_HUMAN	-0.63	3 beta-hydroxysteroid dehydrogenase/Delta 5-->4
Q96MU8	KREM1_HUMAN	2.96	Kremen protein 1
Q02297	NRG1_HUMAN	1.67	Pro-neuregulin-1, membrane-bound isoform
O00124	UBXN8_HUMAN	0.81	UBX domain-containing protein 8
Q86SG4	DPCA2_HUMAN	0.61	Putative Dresden prostate carcinoma protein 2
Q8TBF4	ZCRB1_HUMAN	-0.42	Zinc finger CCHC-type and RNA-binding motif-con
O95696	BRD1_HUMAN	1.83	Bromodomain-containing protein 1
Q15111	PLCL1_HUMAN	1.48	Inactive phospholipase C-like protein 1
Q6DKI2	LEG9C_HUMAN	2.57	Galectin-9C
Q96L91	EP400_HUMAN	3.49	E1A-binding protein p400
Q9H967	WDR76_HUMAN	1.57	WD repeat-containing protein 76
Q05BV3	EMAL5_HUMAN	1.43	Echinoderm microtubule-associated protein-like
Q96LR2	LURA1_HUMAN	1.53	Leucine rich adaptor protein 1
O15305	PMM2_HUMAN	3.68	Phosphomannomutase 2
O75064	DEN4B_HUMAN	3.38	DENN domain-containing protein 4B
Q6ZW13	CP086_HUMAN	1.03	Uncharacterized protein C16orf86
Q6UW49	SPESP_HUMAN	0.61	Sperm equatorial segment protein 1
Q96JJ3	ELMO2_HUMAN	0.05	Engulfment and cell motility protein 2
Q9Y5F3	PCDB1_HUMAN	1.2	Protocadherin beta-1
Q15813	TBCE_HUMAN	2.33	Tubulin-specific chaperone E
Q9UKA2	FBXL4_HUMAN	1.72	F-box/LRR-repeat protein 4
Q6BAA4	FCRLB_HUMAN	1.34	Fc receptor-like B
Q9UH77	KLHL3_HUMAN	1.4	Kelch-like protein 3
A3KFT3	OR2M5_HUMAN	0.36	Olfactory receptor 2M5
Q9H579	MROH8_HUMAN	-0.27	Protein MROH8
Q8IYF1	ELOA2_HUMAN	2.23	RNA polymerase II transcription factor SIII sub
Q9UL12	SARDH_HUMAN	1.86	Sarcosine dehydrogenase, mitochondrial
Q9H7H0	MET17_HUMAN	1.46	Methyltransferase-like protein 17, mitochondria
P48050	KCNJ4_HUMAN	0.96	Inward rectifier potassium channel 4
A6NCK2	TR43B_HUMAN	0.83	Tripartite motif-containing protein 43B
Q96D21	RHES_HUMAN	1.16	GTP-binding protein Rhes
Q969K3	RNF34_HUMAN	4.31	E3 ubiquitin-protein ligase RNF34
Q9NRY5	F1142_HUMAN	0.2	Protein FAM114A2
Q658P3	STEA3_HUMAN	-0.18	Metalloreductase STEAP3
P10072	HKR1_HUMAN	2.84	Krueppel-related zinc finger protein 1
P12645	BMP3_HUMAN	1.68	Bone morphogenetic protein 3
P22392	NDKB_HUMAN	1.81	Nucleoside diphosphate kinase B
O75072	FKTN_HUMAN	-0.59	Fukutin
P62269	RS18_HUMAN	-1.93	40S ribosomal protein S18
P21980	TGM2_HUMAN	0.91	Protein-glutamine gamma-glutamyltransferase 2
Q8WV99	ZFN2B_HUMAN	1.91	AN1-type zinc finger protein 2B
Q12794	HYAL1_HUMAN	1.48	Hyaluronidase-1
Q9H611	PIF1_HUMAN	0.47	ATP-dependent DNA helicase PIF1
Q9H1E3	NUCKS_HUMAN	1.47	Nuclear ubiquitous casein and cyclin-dependent
Q9BT40	INP5K_HUMAN	0.08	Inositol polyphosphate 5-phosphatase K
O75459	PAGE1_HUMAN	0.37	P antigen family member 1
A6NNZ2	TBB8L_HUMAN	1.18	Tubulin beta-8 chain-like protein LOC260334
A6NKF1	SAC31_HUMAN	0.79	SAC3 domain-containing protein 1
Q9UNI6	DUS12_HUMAN	0.54	Dual specificity protein phosphatase 12
Q6ICI0	TM211_HUMAN	-0.21	Transmembrane protein 211
P0DKL9	A14EL_HUMAN	2.13	ARL14 effector protein-like
Q8NG76	O2T33_HUMAN	0.37	Olfactory receptor 2T33
Q9H2X9	S12A5_HUMAN	1.14	Solute carrier family 12 member 5
Q8N3K9	CMYA5_HUMAN	1.52	Cardiomyopathy-associated protein 5
O60235	TM11D_HUMAN	0.83	Transmembrane protease serine 11D
Q8NGA5	O10H4_HUMAN	-0.41	Olfactory receptor 10H4
Q9UKN7	MYO15_HUMAN	7.03	Unconventional myosin-XV
Q9BPY3	F118B_HUMAN	0.16	Protein FAM118B
Q8IU89	CERS3_HUMAN	-1.18	Ceramide synthase 3
Q9H015	S22A4_HUMAN	-0.26	Solute carrier family 22 member 4
Q567U6	CCD93_HUMAN	-0.31	Coiled-coil domain-containing protein 93
Q9NTJ3	SMC4_HUMAN	0.39	Structural maintenance of chromosomes protein 4
P52789	HXK2_HUMAN	1.54	Hexokinase-2
Q0VF49	K2012_HUMAN	2.59	Uncharacterized protein KIAA2012
Q6UXM1	LRIG3_HUMAN	1.27	Leucine-rich repeats and immunoglobulin-like do
O43766	LIAS_HUMAN	0.38	Lipoyl synthase, mitochondrial
Q9H093	NUAK2_HUMAN	0.54	NUAK family SNF1-like kinase 2
P54252	ATX3_HUMAN	-0.15	Ataxin-3
Q5QJ74	TBCEL_HUMAN	0.88	Tubulin-specific chaperone cofactor E-like prot
Q9Y3P8	SIT1_HUMAN	0.5	Signaling threshold-regulating transmembrane ada
Q96RU2	UBP28_HUMAN	1.66	Ubiquitin carboxyl-terminal hydrolase 28
P35367	HRH1_HUMAN	0.55	Histamine H1 receptor
O94776	MTA2_HUMAN	1.62	Metastasis-associated protein MTA2
Q16832	DDR2_HUMAN	1.28	Discoidin domain-containing receptor 2
A6NDB9	PALM3_HUMAN	2.89	Paralemmin-3
Q96Q35	AL2SB_HUMAN	0.02	Amyotrophic lateral sclerosis 2 chromosomal reg
Q8IVM8	S22A9_HUMAN	-0.1	Solute carrier family 22 member 9
O75677	RFPL1_HUMAN	1.15	Ret finger protein-like 1
Q96A11	G3ST3_HUMAN	0.91	Galactose-3-O-sulfotransferase 3
Q16288	NTRK3_HUMAN	1.08	NT-3 growth factor receptor
Q13421	MSLN_HUMAN	1.12	Mesothelin
Q8WYG7	Q8WYG7_HUMAN	-0.32	HCG1985569
A8K010	CF176_HUMAN	0.66	Putative transcriptional regulator encoded by L
Q8IV77	CNGA4_HUMAN	0.63	Cyclic nucleotide-gated cation channel alpha-4
Q96J86	CYYR1_HUMAN	2.73	Cysteine and tyrosine-rich protein 1
P0C7T5	ATX1L_HUMAN	2.25	Ataxin-1-like
Q8NB91	FANCB_HUMAN	0.02	Fanconi anemia group B protein
Q6P444	MTFR2_HUMAN	1.09	Mitochondrial fission regulator 2
P43234	CATO_HUMAN	1.44	Cathepsin O
Q8N816	TMM99_HUMAN	-0.52	Transmembrane protein 99
Q8NDX2	VGLU3_HUMAN	-0.06	Vesicular glutamate transporter 3
P0CG00	ZSA5D_HUMAN	1.74	Putative zinc finger and SCAN domain-containing
Q5T2R2	DPS1_HUMAN	0.48	Decaprenyl-diphosphate synthase subunit 1
P31321	KAP1_HUMAN	1.07	cAMP-dependent protein kinase type I-beta regula
Q9H7Z6	KAT8_HUMAN	2.04	Histone acetyltransferase KAT8
Q92730	RND1_HUMAN	-0.02	Rho-related GTP-binding protein Rho6
C9J3V5	TEX22_HUMAN	0.08	Testis-expressed sequence 22 protein
A6NKD2	TSPY2_HUMAN	0.09	Testis-specific Y-encoded protein 2
Q16678	CP1B1_HUMAN	0.22	Cytochrome P450 1B1
P51504	ZNF80_HUMAN	0.33	Zinc finger protein 80
P46379	BAG6_HUMAN	3.34	Large proline-rich protein BAG6
Q12948	FOXC1_HUMAN	5.69	Forkhead box protein C1
Q96IZ5	RBM41_HUMAN	-0.05	RNA-binding protein 41
Q6ZVD7	STOX1_HUMAN	0.5	Storkhead-box protein 1
Q8IXZ2	ZC3H3_HUMAN	3.38	Zinc finger CCCH domain-containing protein 3
Q9HB19	PKHA2_HUMAN	1.87	Pleckstrin homology domain-containing family A
Q8NGF0	O52B6_HUMAN	-0.45	Olfactory receptor 52B6
O95562	SFT2B_HUMAN	-1.43	Vesicle transport protein SFT2B
O43670	ZN207_HUMAN	5.49	BUB3-interacting and GLEBS motif-containing pro
Q9UH03	SEPT3_HUMAN	-0.19	Neuronal-specific septin-3
Q8TAA9	VANG1_HUMAN	1.44	Vang-like protein 1
Q9UGM5	FETUB_HUMAN	0.06	Fetuin-B
E9PAM4	E9PAM4_HUMAN	0.9	Uncharacterized protein
P25054	APC_HUMAN	3.21	Adenomatous polyposis coli protein
Q14714	SSPN_HUMAN	-0.29	Sarcospan
Q9Y3D9	RT23_HUMAN	1.25	28S ribosomal protein S23, mitochondrial
A0A0B4J2G8	A0A0B4J2G8_HUMAN	-0.83	Uncharacterized protein
Q9UMW8	UBP18_HUMAN	1.58	Ubl carboxyl-terminal hydrolase 18
Q76G19	PDZD4_HUMAN	2.39	PDZ domain-containing protein 4
S4R3N1	S4R3N1_HUMAN	-0.99	Protein HSPE1-MOB4
Q96M02	CJ090_HUMAN	1.23	Centrosomal protein C10orf90
Q8N137	CNTRB_HUMAN	1.63	Centrobin
Q96AM1	MRGRF_HUMAN	-0.25	Mas-related G-protein coupled receptor member F
Q96LA8	ANM6_HUMAN	0.39	Protein arginine N-methyltransferase 6
P0CG08	GPHRB_HUMAN	-0.92	Golgi pH regulator B
Q9Y5Z6	B3GT1_HUMAN	1.18	Beta-1,3-galactosyltransferase 1
I3L0S3	PYAS1_HUMAN	1.42	Putative uncharacterized protein PYCARD-AS1
Q9BWK5	MRI_HUMAN	0.21	Modulator of retrovirus infection homolog
O75648	MTU1_HUMAN	0.94	Mitochondrial tRNA-specific 2-thiouridylase 1
Q12874	SF3A3_HUMAN	1.08	Splicing factor 3A subunit 3
Q9NX20	RM16_HUMAN	0.4	39S ribosomal protein L16, mitochondrial
O95406	CNIH1_HUMAN	-1.87	Protein cornichon homolog 1
Q96QU4	FRG2B_HUMAN	0.57	Protein FRG2-like-1
Q9Y2R9	RT07_HUMAN	-0.78	28S ribosomal protein S7, mitochondrial
Q12951	FOXI1_HUMAN	4.96	Forkhead box protein I1
Q9Y4P9	SPEF1_HUMAN	2.19	Sperm flagellar protein 1
Q9UQQ1	NALDL_HUMAN	2.19	N-acetylated-alpha-linked acidic dipeptidase-li
Q9H171	ZBP1_HUMAN	1.93	Z-DNA-binding protein 1
P49802	RGS7_HUMAN	0.89	Regulator of G-protein signaling 7
Q99619	SPSB2_HUMAN	-0.61	SPRY domain-containing SOCS box protein 2
Q96AT9	RPE_HUMAN	0.18	Ribulose-phosphate 3-epimerase
Q15024	EXOS7_HUMAN	0.49	Exosome complex component RRP42
Q96C45	ULK4_HUMAN	0.25	Serine/threonine-protein kinase ULK4
Q9H237	PORCN_HUMAN	0.83	Protein-serine O-palmitoleoyltransferase porcup
Q3ZCQ8	TIM50_HUMAN	1.26	Mitochondrial import inner membrane translocase
Q8NGI0	O52N2_HUMAN	-0.84	Olfactory receptor 52N2
Q9H6L4	ARMC7_HUMAN	-1.97	Armadillo repeat-containing protein 7
Q16816	PHKG1_HUMAN	0.15	Phosphorylase b kinase gamma catalytic chain, s
Q6P1S2	CC033_HUMAN	-1.19	Protein C3orf33
Q8IUK8	CBLN2_HUMAN	-0.09	Cerebellin-2
Q6UX40	TM107_HUMAN	-0.05	Transmembrane protein 107
Q92482	AQP3_HUMAN	0.63	Aquaporin-3
P53396	ACLY_HUMAN	1.27	ATP-citrate synthase
O15054	KDM6B_HUMAN	4.44	Lysine-specific demethylase 6B
P16444	DPEP1_HUMAN	-0.27	Dipeptidase 1
Q9BXM9	FSD1L_HUMAN	0.11	FSD1-like protein
Q8NGI8	O5AN1_HUMAN	-0.22	Olfactory receptor 5AN1
Q6UVY6	MOXD1_HUMAN	0.94	DBH-like monooxygenase protein 1
Q9Y5N6	ORC6_HUMAN	-0.98	Origin recognition complex subunit 6
Q3SXZ7	TTLL9_HUMAN	0.39	Probable tubulin polyglutamylase TTLL9
P14209	CD99_HUMAN	3.82	CD99 antigen
Q9NZN9	AIPL1_HUMAN	-0.1	Aryl-hydrocarbon-interacting protein-like 1
O95661	DIRA3_HUMAN	-0.27	GTP-binding protein Di-Ras3
Q08AG5	ZN844_HUMAN	1.03	Zinc finger protein 844
Q14644	RASA3_HUMAN	0.99	Ras GTPase-activating protein 3
Q16563	SYPL1_HUMAN	1.26	Synaptophysin-like protein 1
P55017	S12A3_HUMAN	0.84	Solute carrier family 12 member 3
Q6P435	SMG1L_HUMAN	3.21	Putative uncharacterized SMG1-like protein
Q4U2R8	S22A6_HUMAN	0.82	Solute carrier family 22 member 6
Q96PF1	TGM7_HUMAN	1.04	Protein-glutamine gamma-glutamyltransferase Z
H0YJW9	H0YJW9_HUMAN	0.75	Uncharacterized protein (Fragment)
P56945	BCAR1_HUMAN	2.51	Breast cancer anti-estrogen resistance protein
Q05655	KPCD_HUMAN	0.21	Protein kinase C delta type
O15021	MAST4_HUMAN	4.58	Microtubule-associated serine/threonine-protein
P08709	FA7_HUMAN	2.75	Coagulation factor VII
P23497	SP100_HUMAN	1.62	Nuclear autoantigen Sp-100
Q9BSW2	EFC4B_HUMAN	-0.89	EF-hand calcium-binding domain-containing prote
P08842	STS_HUMAN	0.85	Steryl-sulfatase
Q96PR1	KCNC2_HUMAN	3.75	Potassium voltage-gated channel subfamily C mem
Q5W0Z9	ZDH20_HUMAN	0.96	Probable palmitoyltransferase ZDHHC20
Q13361	MFAP5_HUMAN	-0.64	Microfibrillar-associated protein 5
Q7Z5J8	ANKAR_HUMAN	0.43	Ankyrin and armadillo repeat-containing protein
Q86Y33	CD20B_HUMAN	0.39	Cell division cycle protein 20 homolog B
P61224	RAP1B_HUMAN	-0.63	Ras-related protein Rap-1b
P58753	TIRAP_HUMAN	0.67	Toll/interleukin-1 receptor domain-containing a
Q9UKQ9	KLK9_HUMAN	1.13	Kallikrein-9
Q9C099	LRCC1_HUMAN	0.29	Leucine-rich repeat and coiled-coil domain-cont
Q7Z5J4	RAI1_HUMAN	3.95	Retinoic acid-induced protein 1
Q9Y259	CHKB_HUMAN	0.13	Choline/ethanolamine kinase
A6NJ78	MET15_HUMAN	0.05	Probable methyltransferase-like protein 15
Q8NHM5	KDM2B_HUMAN	1.63	Lysine-specific demethylase 2B
Q14576	ELAV3_HUMAN	0.91	ELAV-like protein 3
P25089	FPR3_HUMAN	-0.87	N-formyl peptide receptor 3
O60238	BNI3L_HUMAN	1.52	BCL2/adenovirus E1B 19 kDa protein-interacting
P30085	KCY_HUMAN	-0.32	UMP-CMP kinase
Q9HBE4	IL21_HUMAN	-0.82	Interleukin-21
A8K0S8	ME3L2_HUMAN	1.61	Putative homeobox protein Meis3-like 2
O95838	GLP2R_HUMAN	0.47	Glucagon-like peptide 2 receptor
Q8TAL5	CI043_HUMAN	1.2	Uncharacterized protein C9orf43
Q13886	KLF9_HUMAN	1.22	Krueppel-like factor 9
Q8IYS0	GRM1C_HUMAN	0.1	GRAM domain-containing protein 1C
P32241	VIPR1_HUMAN	0.48	Vasoactive intestinal polypeptide receptor 1
P01375	TNFA_HUMAN	-0.26	Tumor necrosis factor
Q9NY47	CA2D2_HUMAN	2.82	Voltage-dependent calcium channel subunit alpha
Q01780	EXOSX_HUMAN	1.65	Exosome component 10
Q8NA54	IQUB_HUMAN	-0.5	IQ and ubiquitin-like domain-containing protein
O14727	APAF_HUMAN	0.85	Apoptotic protease-activating factor 1
Q58F21	BRDT_HUMAN	1.07	Bromodomain testis-specific protein
Q13255	GRM1_HUMAN	1.52	Metabotropic glutamate receptor 1
Q8IXB1	DJC10_HUMAN	0.48	DnaJ homolog subfamily C member 10
Q9H8L6	MMRN2_HUMAN	1.55	Multimerin-2
Q96QC0	PP1RA_HUMAN	13.19	Serine/threonine-protein phosphatase 1 regulato
O43680	TCF21_HUMAN	0.67	Transcription factor 21
P51508	ZNF81_HUMAN	0.28	Zinc finger protein 81
Q8NGZ9	O2T10_HUMAN	-0.24	Olfactory receptor 2T10
P52564	MP2K6_HUMAN	-0.32	Dual specificity mitogen-activated protein kina
I3L0A0	I3L0A0_HUMAN	-0.1	HCG2044781
Q8WVX9	FACR1_HUMAN	0.03	Fatty acyl-CoA reductase 1
Q96L15	NAR5_HUMAN	-0.46	Ecto-ADP-ribosyltransferase 5
Q8NEQ6	CA064_HUMAN	0.74	Uncharacterized protein C1orf64
Q6ZSB9	ZBT49_HUMAN	0.84	Zinc finger and BTB domain-containing protein 4
Q6IF00	OR2T2_HUMAN	0.28	Olfactory receptor 2T2
P31327	CPSM_HUMAN	1.01	Carbamoyl-phosphate synthase [ammonia], mitochon
Q14683	SMC1A_HUMAN	1.03	Structural maintenance of chromosomes protein 1
Q9NQ76	MEPE_HUMAN	3.14	Matrix extracellular phosphoglycoprotein
G3V3Y1	G3V3Y1_HUMAN	0.15	Uncharacterized protein
P42126	ECI1_HUMAN	-0.48	Enoyl-CoA delta isomerase 1, mitochondrial
P14920	OXDA_HUMAN	-0.06	D-amino-acid oxidase
Q86TV6	TTC7B_HUMAN	0.04	Tetratricopeptide repeat protein 7B
Q2T9J0	TYSD1_HUMAN	1.65	Peroxisomal leader peptide-processing protease
B0YJ81	HACD1_HUMAN	0.23	Very-long-chain (3R)-3-hydroxyacyl-CoA dehydrat
Q96G01	BICD1_HUMAN	2.48	Protein bicaudal D homolog 1
Q96RV3	PCX1_HUMAN	4.59	Pecanex-like protein 1
Q92499	DDX1_HUMAN	1.24	ATP-dependent RNA helicase DDX1
Q16513	PKN2_HUMAN	0.98	Serine/threonine-protein kinase N2
Q9UJ04	TSYL4_HUMAN	1.59	Testis-specific Y-encoded-like protein 4
O00584	RNT2_HUMAN	0.48	Ribonuclease T2
Q6ZUV0	BACHL_HUMAN	0.42	Putative cytosolic acyl coenzyme A thioester hy
Q8IZ81	ELMD2_HUMAN	-0.79	ELMO domain-containing protein 2
Q9BZH6	WDR11_HUMAN	0.6	WD repeat-containing protein 11
P20849	CO9A1_HUMAN	5.22	Collagen alpha-1(IX) chain
Q9BXJ9	NAA15_HUMAN	-0.5	N-alpha-acetyltransferase 15, NatA auxiliary su
Q96R28	OR2M2_HUMAN	0.53	Olfactory receptor 2M2
P0CG22	DR4L1_HUMAN	-0.82	Putative dehydrogenase/reductase SDR family mem
Q14324	MYPC2_HUMAN	1.13	Myosin-binding protein C, fast-type
Q8IUH3	RBM45_HUMAN	1.36	RNA-binding protein 45
Q7Z6J0	SH3R1_HUMAN	1.88	E3 ubiquitin-protein ligase SH3RF1
Q01094	E2F1_HUMAN	1.46	Transcription factor E2F1
Q13057	COASY_HUMAN	1.74	Bifunctional coenzyme A synthase
O95544	NADK_HUMAN	1.09	NAD kinase
P0C7H9	U17L7_HUMAN	0.08	Inactive ubiquitin carboxyl-terminal hydrolase
P51911	CNN1_HUMAN	0.2	Calponin-1
P41208	CETN2_HUMAN	-0.79	Centrin-2
Q15771	RAB30_HUMAN	-0.27	Ras-related protein Rab-30
Q8N653	LZTR1_HUMAN	1.53	Leucine-zipper-like transcriptional regulator 1
Q13203	MYBPH_HUMAN	0.67	Myosin-binding protein H
Q9Y4C2	TCAF1_HUMAN	1.24	TRPM8 channel-associated factor 1
P20292	AL5AP_HUMAN	-0.97	Arachidonate 5-lipoxygenase-activating protein
P28223	5HT2A_HUMAN	2.2	5-hydroxytryptamine receptor 2A
P22415	USF1_HUMAN	1.19	Upstream stimulatory factor 1
Q96E29	MTEF3_HUMAN	1.17	Transcription termination factor 3, mitochondri
O00628	PEX7_HUMAN	-0.27	Peroxisomal targeting signal 2 receptor
Q9NY84	VNN3_HUMAN	0.52	Vascular non-inflammatory molecule 3
P18074	ERCC2_HUMAN	0.54	TFIIH basal transcription factor complex helica
Q5TYX0	PRAM5_HUMAN	0.32	PRAME family member 5
Q9UQB9	AURKC_HUMAN	-0.17	Aurora kinase C
Q96ME7	ZN512_HUMAN	2.02	Zinc finger protein 512
A0A1B0GTJ6	A0A1B0GTJ6_HUMAN	2.81	HCG1796489
Q9NYF5	FA13B_HUMAN	0.35	Protein FAM13B
P54315	LIPR1_HUMAN	1.11	Inactive pancreatic lipase-related protein 1
Q00169	PIPNA_HUMAN	-1.67	Phosphatidylinositol transfer protein alpha iso
O14777	NDC80_HUMAN	0.72	Kinetochore protein NDC80 homolog
P19532	TFE3_HUMAN	1.65	Transcription factor E3
P30533	AMRP_HUMAN	0.2	Alpha-2-macroglobulin receptor-associated protei
A6NC78	GOG8I_HUMAN	3.65	Putative golgin subfamily A member 8I
Q5T4W7	ARTN_HUMAN	1.82	Artemin
Q7RTS7	K2C74_HUMAN	5.45	Keratin, type II cytoskeletal 74
Q96SL8	FIZ1_HUMAN	2.06	Flt3-interacting zinc finger protein 1
Q8NGQ5	OR9Q1_HUMAN	-0.73	Olfactory receptor 9Q1
Q6AWC2	WWC2_HUMAN	2.17	Protein WWC2
Q96RP7	G3ST4_HUMAN	0.22	Galactose-3-O-sulfotransferase 4
Q9BS86	ZPBP1_HUMAN	-0.13	Zona pellucida-binding protein 1
P10586	PTPRF_HUMAN	1.76	Receptor-type tyrosine-protein phosphatase F
Q9UJT9	FBXL7_HUMAN	2.29	F-box/LRR-repeat protein 7
Q68CL5	TPGS2_HUMAN	-0.42	Tubulin polyglutamylase complex subunit 2
Q96EF9	ZHX1R_HUMAN	-1.07	Zinc fingers and homeoboxes protein 1, isoform
Q8N8R5	CB069_HUMAN	0.76	UPF0565 protein C2orf69
P49682	CXCR3_HUMAN	0.01	C-X-C chemokine receptor type 3
Q9NX76	CKLF6_HUMAN	-0.94	CKLF-like MARVEL transmembrane domain-containin
Q9GZZ9	UBA5_HUMAN	0.18	Ubiquitin-like modifier-activating enzyme 5
Q5VZI3	CI091_HUMAN	0.29	Transmembrane protein C9orf91
A0A096LPK6	A0A096LPK6_HUMAN	-0.26	Uncharacterized protein (Fragment)
Q9H3L0	MMAD_HUMAN	2.47	Methylmalonic aciduria and homocystinuria type D
Q9BXY0	MAK16_HUMAN	0.93	Protein MAK16 homolog
Q8NFZ3	NLGNY_HUMAN	1.59	Neuroligin-4, Y-linked
Q13308	PTK7_HUMAN	1.67	Inactive tyrosine-protein kinase 7
Q6UYE1	LEU7_HUMAN	2.27	Leukemia-associated protein 7
P61026	RAB10_HUMAN	0.27	Ras-related protein Rab-10
Q96RD0	OR8B2_HUMAN	-0.12	Olfactory receptor 8B2
A0JNW5	UH1BL_HUMAN	0.97	UHRF1-binding protein 1-like
Q9Y3P4	RHBD3_HUMAN	1.95	Rhomboid domain-containing protein 3
A0A0G2JMZ2	A0A0G2JMZ2_HUMAN	1.9	Uncharacterized protein
O15118	NPC1_HUMAN	1.25	Niemann-Pick C1 protein
Q8WXG6	MADD_HUMAN	2.68	MAP kinase-activating death domain protein
Q96PP8	GBP5_HUMAN	-0.1	Guanylate-binding protein 5
Q7M4L6	SHF_HUMAN	1	SH2 domain-containing adapter protein F
Q9NX77	ENK13_HUMAN	0.41	Endogenous retrovirus group K member 13-1 Env p
O95522	PRA12_HUMAN	-0.22	PRAME family member 12
Q9P281	BAHC1_HUMAN	3.31	BAH and coiled-coil domain-containing protein 1
O15547	P2RX6_HUMAN	1	P2X purinoceptor 6
P02533	K1C14_HUMAN	7.82	Keratin, type I cytoskeletal 14
Q9Y4C0	NRX3A_HUMAN	2.65	Neurexin-3
O75443	TECTA_HUMAN	2.25	Alpha-tectorin
Q96QD9	UIF_HUMAN	0.65	UAP56-interacting factor
Q8NET6	CHSTD_HUMAN	-0.31	Carbohydrate sulfotransferase 13
Q9BT78	CSN4_HUMAN	-1.6	COP9 signalosome complex subunit 4
P48995	TRPC1_HUMAN	0.35	Short transient receptor potential channel 1
Q14651	PLSI_HUMAN	-0.45	Plastin-1
Q8NHU3	SMS2_HUMAN	-0.2	Phosphatidylcholine:ceramide cholinephosphotrans
Q76KP1	B4GN4_HUMAN	2.07	N-acetyl-beta-glucosaminyl-glycoprotein 4-beta-
Q6MZZ7	CAN13_HUMAN	-0.04	Calpain-13
Q6ZMJ4	IL34_HUMAN	-0.1	Interleukin-34
Q49A26	GLYR1_HUMAN	0.24	Putative oxidoreductase GLYR1
Q63HN1	F205B_HUMAN	0.09	Putative protein FAM205B
Q5T7P8	SYT6_HUMAN	0.3	Synaptotagmin-6
Q8WWG9	KCNE4_HUMAN	0.74	Potassium voltage-gated channel subfamily E mem
Q9BW66	CINP_HUMAN	0.22	Cyclin-dependent kinase 2-interacting protein
Q96AB6	NTAN1_HUMAN	0.24	Protein N-terminal asparagine amidohydrolase
Q96QB1	RHG07_HUMAN	2.58	Rho GTPase-activating protein 7
Q16611	BAK_HUMAN	-0.64	Bcl-2 homologous antagonist/killer
P78426	NKX61_HUMAN	2.7	Homeobox protein Nkx-6.1
Q8WWN9	ICEF1_HUMAN	0.49	Interactor protein for cytohesin exchange facto
A8K0R7	ZN839_HUMAN	1.24	Zinc finger protein 839
Q96FX7	TRM61_HUMAN	0.64	tRNA (adenine(58)-N(1))-methyltransferase catal
Q9NYT0	PLEK2_HUMAN	0.59	Pleckstrin-2
O95980	RECK_HUMAN	2.1	Reversion-inducing cysteine-rich protein with Ka
P54709	AT1B3_HUMAN	-0.44	Sodium/potassium-transporting ATPase subunit be
Q13002	GRIK2_HUMAN	0.67	Glutamate receptor ionotropic, kainate 2
Q8IZT9	FAM9C_HUMAN	1.28	Protein FAM9C
Q9H4I8	SEHL2_HUMAN	1	Serine hydrolase-like protein 2
Q9Y4G8	RPGF2_HUMAN	2.78	Rap guanine nucleotide exchange factor 2
Q13838	DX39B_HUMAN	1.5	Spliceosome RNA helicase DDX39B
Q8WXS8	ATS14_HUMAN	5.36	A disintegrin and metalloproteinase with thromb
Q8TD31	CCHCR_HUMAN	4.16	Coiled-coil alpha-helical rod protein 1
Q14554	PDIA5_HUMAN	0.01	Protein disulfide-isomerase A5
Q13905	RPGF1_HUMAN	2.64	Rap guanine nucleotide exchange factor 1
Q8TDV0	GP151_HUMAN	0.33	Probable G-protein coupled receptor 151
A0A0A6YYC8	A0A0A6YYC8_HUMAN	1.44	Uncharacterized protein
Q9P258	RCC2_HUMAN	3.11	Protein RCC2
O95273	CCDB1_HUMAN	-0.93	Cyclin-D1-binding protein 1
B2RNG4	B2RNG4_HUMAN	0.62	Protein TRIM6-TRIM34
Q8NCQ5	FBX15_HUMAN	0.95	F-box only protein 15
Q16828	DUS6_HUMAN	1.17	Dual specificity protein phosphatase 6
Q99733	NP1L4_HUMAN	0.14	Nucleosome assembly protein 1-like 4
G3V3G9	G3V3G9_HUMAN	2.09	Uncharacterized protein
P30291	WEE1_HUMAN	3.74	Wee1-like protein kinase
Q8WY98	TM234_HUMAN	-1.61	Transmembrane protein 234
Q9UGT4	SUSD2_HUMAN	2.57	Sushi domain-containing protein 2
O43361	ZN749_HUMAN	0.29	Zinc finger protein 749
Q6A163	K1C39_HUMAN	4.07	Keratin, type I cytoskeletal 39
Q96A25	T106A_HUMAN	0.03	Transmembrane protein 106A
Q3KP22	MAJIN_HUMAN	1.83	Membrane-anchored junction protein
Q9Y2B0	CNPY2_HUMAN	-1.34	Protein canopy homolog 2
Q05682	CALD1_HUMAN	2.48	Caldesmon
Q96CW6	S7A6O_HUMAN	-0.46	Probable RNA polymerase II nuclear localization
Q3ZCQ3	F174B_HUMAN	2.01	Membrane protein FAM174B
P35606	COPB2_HUMAN	0.11	Coatomer subunit beta'
P59540	T2R46_HUMAN	-1.41	Taste receptor type 2 member 46
Q6P9H4	CNKR3_HUMAN	1.64	Connector enhancer of kinase suppressor of ras
Q9H4K7	MTG2_HUMAN	1.91	Mitochondrial ribosome-associated GTPase 2
Q8WV28	BLNK_HUMAN	2.37	B-cell linker protein
P05161	ISG15_HUMAN	-1.11	Ubiquitin-like protein ISG15
Q86WB0	NIPA_HUMAN	2.21	Nuclear-interacting partner of ALK
Q9HAC7	SUCHY_HUMAN	1.01	Succinate--hydroxymethylglutarate CoA-transfera
Q9UKJ8	ADA21_HUMAN	1.28	Disintegrin and metalloproteinase domain-contai
Q8WWX8	SC5AB_HUMAN	0.37	Sodium/myo-inositol cotransporter 2
Q6XYQ8	SYT10_HUMAN	0.88	Synaptotagmin-10
P0C7M8	CLC2L_HUMAN	0	C-type lectin domain family 2 member L
Q8NGT7	O2A12_HUMAN	-1.07	Olfactory receptor 2A12
Q9Y2T3	GUAD_HUMAN	0.88	Guanine deaminase
Q00872	MYPC1_HUMAN	1.27	Myosin-binding protein C, slow-type
Q5JT82	KLF17_HUMAN	1.82	Krueppel-like factor 17
Q96DZ1	ERLEC_HUMAN	0.72	Endoplasmic reticulum lectin 1
Q8IWW6	RHG12_HUMAN	2.44	Rho GTPase-activating protein 12
O95405	ZFYV9_HUMAN	1.1	Zinc finger FYVE domain-containing protein 9
Q9HBE5	IL21R_HUMAN	5.35	Interleukin-21 receptor
P26440	IVD_HUMAN	-0.14	Isovaleryl-CoA dehydrogenase, mitochondrial
Q7LGC8	CHST3_HUMAN	0.86	Carbohydrate sulfotransferase 3
P47211	GALR1_HUMAN	0.45	Galanin receptor type 1
Q8N801	CB061_HUMAN	2.41	Uncharacterized protein C2orf61
Q9NX38	F206A_HUMAN	-0.62	Protein Simiate
Q9UKB3	DJC12_HUMAN	-2.58	DnaJ homolog subfamily C member 12
O75616	ERAL1_HUMAN	0.71	GTPase Era, mitochondrial
O75334	LIPA2_HUMAN	1.55	Liprin-alpha-2
Q96MG8	PCMD1_HUMAN	-0.71	Protein-L-isoaspartate O-methyltransferase doma
Q8N4A0	GALT4_HUMAN	0.99	Polypeptide N-acetylgalactosaminyltransferase 4
Q9BS34	ZN670_HUMAN	0.27	Zinc finger protein 670
Q9H5Z6	F124B_HUMAN	1.02	Protein FAM124B
Q8NB59	SYT14_HUMAN	2	Synaptotagmin-14
P29400	CO4A5_HUMAN	6.21	Collagen alpha-5(IV) chain
Q02880	TOP2B_HUMAN	2.2	DNA topoisomerase 2-beta
Q6NT76	HMBX1_HUMAN	3.48	Homeobox-containing protein 1
Q7RTT9	S29A4_HUMAN	1.53	Equilibrative nucleoside transporter 4
Q9H228	S1PR5_HUMAN	2.32	Sphingosine 1-phosphate receptor 5
Q8N720	ZN655_HUMAN	0.83	Zinc finger protein 655
Q06136	KDSR_HUMAN	-0.12	3-ketodihydrosphingosine reductase
Q96E09	F122A_HUMAN	1.46	Protein FAM122A
Q8N0U2	TMM61_HUMAN	-0.15	Transmembrane protein 61
P38117	ETFB_HUMAN	0.14	Electron transfer flavoprotein subunit beta
Q9H6J7	CK049_HUMAN	1.31	UPF0705 protein C11orf49
Q9NRA0	SPHK2_HUMAN	1.51	Sphingosine kinase 2
P31276	HXC13_HUMAN	4	Homeobox protein Hox-C13
Q6P9A1	ZN530_HUMAN	0.85	Zinc finger protein 530
Q8WW32	HMGB4_HUMAN	-0.01	High mobility group protein B4
Q02083	NAAA_HUMAN	0.87	N-acylethanolamine-hydrolyzing acid amidase
Q8NH61	O51F2_HUMAN	-0.59	Olfactory receptor 51F2
Q9H568	ACTL8_HUMAN	1.96	Actin-like protein 8
Q9NP80	PLPL8_HUMAN	0.7	Calcium-independent phospholipase A2-gamma
P01563	IFNA2_HUMAN	-0.99	Interferon alpha-2
P25685	DNJB1_HUMAN	5.34	DnaJ homolog subfamily B member 1
A6NEW6	F90AG_HUMAN	2.45	Putative protein FAM90A16P/FAM90A17P
Q14183	DOC2A_HUMAN	1.62	Double C2-like domain-containing protein alpha
Q9UN37	VPS4A_HUMAN	0.31	Vacuolar protein sorting-associated protein 4A
P0DMV8	HS71A_HUMAN	1.36	Heat shock 70 kDa protein 1A
Q9P266	JCAD_HUMAN	3.1	Junctional protein associated with coronary arte
Q9ULQ0	STRP2_HUMAN	2.11	Striatin-interacting protein 2
A2RUT3	TMM89_HUMAN	-0.24	Transmembrane protein 89
P13682	ZNF35_HUMAN	0.35	Zinc finger protein 35
P98175	RBM10_HUMAN	5.96	RNA-binding protein 10
Q4G0S4	C27C1_HUMAN	-0.4	Cytochrome P450 27C1
Q8NGY1	O10Z1_HUMAN	-0.7	Olfactory receptor 10Z1
Q8N8W4	PLPL1_HUMAN	1.63	Patatin-like phospholipase domain-containing pr
Q8NGJ2	O52H1_HUMAN	-0.48	Olfactory receptor 52H1
A8MQB3	CQ051_HUMAN	1.39	Uncharacterized protein C17orf51
P26436	ASPX_HUMAN	1.1	Acrosomal protein SP-10
Q5T6L9	EMARD_HUMAN	-0.4	Endoplasmic reticulum membrane-associated RNA d
Q9NZQ3	SPN90_HUMAN	3.03	NCK-interacting protein with SH3 domain
Q96PB7	NOE3_HUMAN	0.86	Noelin-3
Q9BQ90	KLDC3_HUMAN	2.06	Kelch domain-containing protein 3
P0CAP1	MYZAP_HUMAN	0.77	Myocardial zonula adherens protein
Q99732	LITAF_HUMAN	1.63	Lipopolysaccharide-induced tumor necrosis facto
Q86WS4	CL040_HUMAN	0.9	Uncharacterized protein C12orf40
P05089	ARGI1_HUMAN	0.05	Arginase-1
Q9NVR5	KTU_HUMAN	3.96	Protein kintoun
Q8NCD3	HJURP_HUMAN	2.08	Holliday junction recognition protein
P47736	RPGP1_HUMAN	2.45	Rap1 GTPase-activating protein 1
Q7RTS3	PTF1A_HUMAN	3.81	Pancreas transcription factor 1 subunit alpha
Q8TCU4	ALMS1_HUMAN	2.02	Alstrom syndrome protein 1
Q15413	RYR3_HUMAN	2.38	Ryanodine receptor 3
Q8WUD6	CHPT1_HUMAN	-0.07	Cholinephosphotransferase 1
Q92597	NDRG1_HUMAN	1.23	Protein NDRG1
Q86VV8	RTTN_HUMAN	2.98	Rotatin
Q9NP61	ARFG3_HUMAN	2.21	ADP-ribosylation factor GTPase-activating prote
Q6K0P9	IFIX_HUMAN	2.6	Pyrin and HIN domain-containing protein 1
Q16589	CCNG2_HUMAN	0.83	Cyclin-G2
Q8NEM0	MCPH1_HUMAN	1.17	Microcephalin
Q07699	SCN1B_HUMAN	-2.15	Sodium channel subunit beta-1
O75177	CREST_HUMAN	2.08	Calcium-responsive transactivator
Q9Y256	FACE2_HUMAN	0.91	CAAX prenyl protease 2
Q92729	PTPRU_HUMAN	1.65	Receptor-type tyrosine-protein phosphatase U
Q86VY9	T200A_HUMAN	0.55	Transmembrane protein 200A
O43189	PHF1_HUMAN	3.24	PHD finger protein 1
Q6ZSR6	YP007_HUMAN	-0.31	Putative uncharacterized protein FLJ45256
P55082	MFAP3_HUMAN	1.81	Microfibril-associated glycoprotein 3
P54577	SYYC_HUMAN	0.13	Tyrosine--tRNA ligase, cytoplasmic
O00142	KITM_HUMAN	0.03	Thymidine kinase 2, mitochondrial
Q96K83	ZN521_HUMAN	1.54	Zinc finger protein 521
Q9GZT4	SRR_HUMAN	-1.15	Serine racemase
Q12986	NFX1_HUMAN	2.27	Transcriptional repressor NF-X1
Q9Y4A0	JERKL_HUMAN	-0.83	Jerky protein homolog-like
A4UGR9	XIRP2_HUMAN	1.82	Xin actin-binding repeat-containing protein 2
P31267	HXA6_HUMAN	2.93	Homeobox protein Hox-A6
P61981	1433G_HUMAN	-1.71	14-3-3 protein gamma
Q96LU7	MRFL_HUMAN	2.15	Myelin regulatory factor-like protein
Q9UBL9	P2RX2_HUMAN	1.9	P2X purinoceptor 2
Q5T4T6	SYC2L_HUMAN	1.08	Synaptonemal complex protein 2-like
Q8WWP7	GIMA1_HUMAN	-0.42	GTPase IMAP family member 1
Q86VH5	LRRT3_HUMAN	1.01	Leucine-rich repeat transmembrane neuronal prot
Q8NGP6	OR5M8_HUMAN	-0.74	Olfactory receptor 5M8
Q6ZP80	TM182_HUMAN	-0.36	Transmembrane protein 182
Q15436	SC23A_HUMAN	0.92	Protein transport protein Sec23A
Q12931	TRAP1_HUMAN	0.16	Heat shock protein 75 kDa, mitochondrial
Q9BUY7	EFC11_HUMAN	-1.82	EF-hand calcium-binding domain-containing prote
Q7Z614	SNX20_HUMAN	-1	Sorting nexin-20
Q9HBA0	TRPV4_HUMAN	1.94	Transient receptor potential cation channel sub
Q8IVV2	LOXH1_HUMAN	0.94	Lipoxygenase homology domain-containing protein
P14138	EDN3_HUMAN	1.83	Endothelin-3
P59095	STAR6_HUMAN	-0.12	StAR-related lipid transfer protein 6
P58557	YBEY_HUMAN	-0.75	Putative ribonuclease
Q9NUU7	DD19A_HUMAN	-0.09	ATP-dependent RNA helicase DDX19A
Q7Z601	GP142_HUMAN	0.69	Probable G-protein coupled receptor 142
P0DMM9	ST1A3_HUMAN	0.54	Sulfotransferase 1A3
P54855	UDB15_HUMAN	-0.3	UDP-glucuronosyltransferase 2B15
Q96S82	UBL7_HUMAN	2.39	Ubiquitin-like protein 7
Q9H1X1	RSPH9_HUMAN	-0.5	Radial spoke head protein 9 homolog
Q9UK22	FBX2_HUMAN	2.62	F-box only protein 2
O94805	ACL6B_HUMAN	1.05	Actin-like protein 6B
Q6V9R5	ZN562_HUMAN	0.3	Zinc finger protein 562
Q96QK1	VPS35_HUMAN	-0.41	Vacuolar protein sorting-associated protein 35
Q7L8S5	OTU6A_HUMAN	-0.19	OTU domain-containing protein 6A
Q02763	TIE2_HUMAN	1.38	Angiopoietin-1 receptor
Q9Y247	FA50B_HUMAN	1.03	Protein FAM50B
Q9UKP6	UR2R_HUMAN	2.18	Urotensin-2 receptor
Q8NB12	SMYD1_HUMAN	0.13	Histone-lysine N-methyltransferase SMYD1
P48023	TNFL6_HUMAN	3.18	Tumor necrosis factor ligand superfamily member
Q9NV72	ZN701_HUMAN	0.21	Zinc finger protein 701
P51677	CCR3_HUMAN	-1.25	C-C chemokine receptor type 3
Q86UU0	BCL9L_HUMAN	5.35	B-cell CLL/lymphoma 9-like protein
P20265	PO3F2_HUMAN	7.18	POU domain, class 3, transcription factor 2
Q96PX1	RN157_HUMAN	1.92	RING finger protein 157
Q53G59	KLH12_HUMAN	1.35	Kelch-like protein 12
P10253	LYAG_HUMAN	1.73	Lysosomal alpha-glucosidase
Q6IA69	NADE_HUMAN	-0.21	Glutamine-dependent NAD(+) synthetase
P0CAP2	GRL1A_HUMAN	0.38	DNA-directed RNA polymerase II subunit GRINL1A
Q9UGK3	STAP2_HUMAN	1.99	Signal-transducing adaptor protein 2
P06239	LCK_HUMAN	0.57	Tyrosine-protein kinase Lck
O95377	CXB5_HUMAN	0.8	Gap junction beta-5 protein
Q5BKU9	OXLD1_HUMAN	2.18	Oxidoreductase-like domain-containing protein 1
Q9H0K6	PUS7L_HUMAN	-0.54	Pseudouridylate synthase 7 homolog-like protein
O43427	FIBP_HUMAN	0.79	Acidic fibroblast growth factor intracellular-bi
P59537	T2R43_HUMAN	-1.2	Taste receptor type 2 member 43
Q86X53	ERIC1_HUMAN	1.94	Glutamate-rich protein 1
Q6U841	S4A10_HUMAN	0.86	Sodium-driven chloride bicarbonate exchanger
Q9BZV3	IMPG2_HUMAN	1.25	Interphotoreceptor matrix proteoglycan 2
P0CG42	F157B_HUMAN	2.84	Putative protein FAM157B
O15327	INP4B_HUMAN	0.55	Type II inositol 3,4-bisphosphate 4-phosphatase
Q9Y2Z0	SGT1_HUMAN	-0.66	Protein SGT1 homolog
Q9H9Q4	NHEJ1_HUMAN	1.14	Non-homologous end-joining factor 1
Q96H40	ZN486_HUMAN	-0.11	Zinc finger protein 486
Q04727	TLE4_HUMAN	1.7	Transducin-like enhancer protein 4
P0C7M7	ACSM4_HUMAN	2.39	Acyl-coenzyme A synthetase ACSM4, mitochondrial
Q96EY1	DNJA3_HUMAN	1.23	DnaJ homolog subfamily A member 3, mitochondria
Q14181	DPOA2_HUMAN	1.21	DNA polymerase alpha subunit B
Q9Y324	FCF1_HUMAN	-0.95	rRNA-processing protein FCF1 homolog
P52429	DGKE_HUMAN	0.12	Diacylglycerol kinase epsilon
A4QMS1	A4QMS1_HUMAN	1.26	Hypothetical gene supported by BC067869
Q92913	FGF13_HUMAN	-0.44	Fibroblast growth factor 13
Q9Y4K3	TRAF6_HUMAN	0.55	TNF receptor-associated factor 6
Q9BQ13	KCD14_HUMAN	0.71	BTB/POZ domain-containing protein KCTD14
A6NGG8	CB071_HUMAN	2.81	Uncharacterized protein C2orf71
Q9UPR6	ZFR2_HUMAN	4.36	Zinc finger RNA-binding protein 2
Q6ZS82	R9BP_HUMAN	-1.73	Regulator of G-protein signaling 9-binding prote
Q7RTR0	NALP9_HUMAN	-0.01	NACHT, LRR and PYD domains-containing protein 9
Q3KR16	PKHG6_HUMAN	2.36	Pleckstrin homology domain-containing family G
Q9BXX2	AN30B_HUMAN	0.79	Ankyrin repeat domain-containing protein 30B
Q9Y397	ZDHC9_HUMAN	1.1	Palmitoyltransferase ZDHHC9
Q8IXM2	BAP18_HUMAN	-0.16	Chromatin complexes subunit BAP18
O00203	AP3B1_HUMAN	1.22	AP-3 complex subunit beta-1
Q9NQX3	GEPH_HUMAN	0.33	Gephyrin
P0DN77	OPSG2_HUMAN	0.91	Medium-wave-sensitive opsin 2
P78562	PHEX_HUMAN	0.54	Phosphate-regulating neutral endopeptidase
P09110	THIK_HUMAN	0.42	3-ketoacyl-CoA thiolase, peroxisomal
Q9UHC6	CNTP2_HUMAN	3.44	Contactin-associated protein-like 2
Q9NYJ7	DLL3_HUMAN	4.39	Delta-like protein 3
A0PJX4	SHSA3_HUMAN	2.3	Protein shisa-3 homolog
Q8TDD2	SP7_HUMAN	4.14	Transcription factor Sp7
Q9NUP1	BL1S4_HUMAN	1.38	Biogenesis of lysosome-related organelles compl
Q7RTY0	MOT13_HUMAN	0.39	Monocarboxylate transporter 13
Q9BRX2	PELO_HUMAN	0.24	Protein pelota homolog
O60303	K0556_HUMAN	2.68	Protein KIAA0556
Q5SRD0	FA21D_HUMAN	1.2	Putative WASH complex subunit FAM21
Q99988	GDF15_HUMAN	-0.35	Growth/differentiation factor 15
Q8N8U3	ZCHC5_HUMAN	0.22	Zinc finger CCHC domain-containing protein 5
Q9NYV4	CDK12_HUMAN	4.36	Cyclin-dependent kinase 12
P0DMV9	HS71B_HUMAN	1.36	Heat shock 70 kDa protein 1B
Q8WXG9	GPR98_HUMAN	1.66	G-protein coupled receptor 98
Q9BYP9	KRA99_HUMAN	3.37	Keratin-associated protein 9-9
O94763	RMP_HUMAN	3.1	Unconventional prefoldin RPB5 interactor 1
Q9BYQ9	KRA48_HUMAN	2.54	Keratin-associated protein 4-8
Q86VZ1	P2RY8_HUMAN	-0.58	P2Y purinoceptor 8
O75152	ZC11A_HUMAN	2.27	Zinc finger CCCH domain-containing protein 11A
Q9Y547	IFT25_HUMAN	-1.63	Intraflagellar transport protein 25 homolog
Q8N8E3	CE112_HUMAN	0.4	Centrosomal protein of 112 kDa
Q8WVK2	SNR27_HUMAN	-0.03	U4/U6.U5 small nuclear ribonucleoprotein 27 kDa
Q2VWA4	SKOR2_HUMAN	5.53	SKI family transcriptional corepressor 2
Q92990	GLMN_HUMAN	-0.7	Glomulin
Q9H257	CARD9_HUMAN	0.42	Caspase recruitment domain-containing protein 9
Q8N6Y0	USBP1_HUMAN	1.88	Usher syndrome type-1C protein-binding protein
Q9NZN3	EHD3_HUMAN	0.86	EH domain-containing protein 3
Q5FVE4	ACBG2_HUMAN	0.18	Long-chain-fatty-acid--CoA ligase ACSBG2
P01266	THYG_HUMAN	2.21	Thyroglobulin
Q9NZM6	PK2L2_HUMAN	1.27	Polycystic kidney disease 2-like 2 protein
Q12946	FOXF1_HUMAN	3.48	Forkhead box protein F1
Q969Q4	ARL11_HUMAN	-0.96	ADP-ribosylation factor-like protein 11
Q86Y38	XYLT1_HUMAN	3.17	Xylosyltransferase 1
Q96CS7	PKHB2_HUMAN	2.29	Pleckstrin homology domain-containing family B
P51685	CCR8_HUMAN	-0.63	C-C chemokine receptor type 8
Q9UBF9	MYOTI_HUMAN	1.57	Myotilin
A6NFQ7	DPRX_HUMAN	1.65	Divergent paired-related homeobox
A6NFE2	SMCO2_HUMAN	-0.83	Single-pass membrane and coiled-coil domain-con
Q9H3S3	TMPS5_HUMAN	1.87	Transmembrane protease serine 5
Q9HCE9	ANO8_HUMAN	5.72	Anoctamin-8
Q9HAW4	CLSPN_HUMAN	1.68	Claspin
O43897	TLL1_HUMAN	1.35	Tolloid-like protein 1
Q9UBN7	HDAC6_HUMAN	1.65	Histone deacetylase 6
Q1ZZU3	SWI5_HUMAN	0.72	DNA repair protein SWI5 homolog
Q92805	GOGA1_HUMAN	0.92	Golgin subfamily A member 1
P11926	DCOR_HUMAN	0.15	Ornithine decarboxylase
P57081	WDR4_HUMAN	-0.17	tRNA (guanine-N(7)-)-methyltransferase non-catal
P47897	SYQ_HUMAN	0.6	Glutamine--tRNA ligase
Q8IWV2	CNTN4_HUMAN	1.23	Contactin-4
Q8IWY4	SCUB1_HUMAN	3.74	Signal peptide, CUB and EGF-like domain-contain
Q92622	RUBIC_HUMAN	2.16	Run domain Beclin-1-interacting and cysteine-ri
Q8NGA6	O10H5_HUMAN	0.2	Olfactory receptor 10H5
[truncated: 16,583 more rows]

## Sheet: ECOLI
UID	Uniprot Name	PScore
P76055	TTCA_ECOLI	0.06
P31455	YIDR_ECOLI	0.91
P46855	YHHZ_ECOLI	0.74
P04693	TYRB_ECOLI	0.2
P0A812	RUVB_ECOLI	-0.68
P32153	FRVX_ECOLI	0.82
P0AFL3	PPIA_ECOLI	0.5
P0CE48	EFTU2_ECOLI	1.35
P64564	YGGT_ECOLI	-1.7
P0ADL3	YICN_ECOLI	-1.47
P31658	HCHA_ECOLI	-0.47
P76085	PAAK_ECOLI	0.91
P17802	MUTY_ECOLI	-0.24
P0AAG3	GLTL_ECOLI	0.49
P77610	ANSP_ECOLI	-0.33
P00903	PABA_ECOLI	-0.48
P0A7E3	PYRE_ECOLI	-1.11
P76540	EUTK_ECOLI	-0.08
P77196	YFCU_ECOLI	2.88
P76162	YDFU_ECOLI	0.86
P0A915	OMPW_ECOLI	0.78
P0ABQ4	DYR_ECOLI	-0.05
P0A6S0	FLGH_ECOLI	1.59
P75777	YBHG_ECOLI	0.76
P77700	YAHB_ECOLI	-0.68
P42632	TDCE_ECOLI	0.69
P52127	YFJL_ECOLI	0.03
P39160	UXUB_ECOLI	-0.3
P77223	RSXB_ECOLI	0.76
P76176	YDGD_ECOLI	1.17
P77668	HYFI_ECOLI	0.11
P32056	GMM_ECOLI	-0.67
P45469	YRAR_ECOLI	-1.2
P71242	WCAK_ECOLI	-0.21
P0A7I4	RF3_ECOLI	0.95
P28722	YHCA_ECOLI	0.39
P23827	ECOT_ECOLI	-0.72
P31453	YIDP_ECOLI	-0.92
P0AG07	RPE_ECOLI	-0.69
P26218	BGLH_ECOLI	2.73
P37005	LAST_ECOLI	-1.37
P39300	ULAG_ECOLI	0.92
P36683	ACNB_ECOLI	1.02
P46850	RTCB_ECOLI	0.12
P0ADT5	YGIC_ECOLI	0.42
P77216	YBDN_ECOLI	-0.05
P76656	YQII_ECOLI	0.87
P46888	USPC_ECOLI	-0.69
P0A6L0	DEOC_ECOLI	-0.41
P23862	PRIC_ECOLI	-1.26
P32141	SQUT_ECOLI	-1.05
P52636	YCCM_ECOLI	-0.64
P75883	GFCC_ECOLI	-0.2
P30859	ARTI_ECOLI	-0.83
P76316	DCYD_ECOLI	0.43
P60438	RL3_ECOLI	0.21
P26266	FEPE_ECOLI	-0.63
P0ACT6	UIDR_ECOLI	-2.26
P0AGD1	SODC_ECOLI	0.74
P0CF91	INSL1_ECOLI	0.4
P09372	GRPE_ECOLI	0.94
P0AB89	PUR8_ECOLI	-0.44
P33602	NUOG_ECOLI	1.32
P37760	RMLD_ECOLI	-0.95
P52138	YFJW_ECOLI	0.01
P76103	YDCO_ECOLI	-0.36
P40876	YCBF_ECOLI	-1.12
P0A6E1	AROL_ECOLI	-1.45
P32129	YIHG_ECOLI	-0.79
P77611	RSXC_ECOLI	0.3
P31456	CBRA_ECOLI	-0.73
P0AFE8	NUOM_ECOLI	-0.75
P07762	GLGB_ECOLI	1.31
P37610	TAUD_ECOLI	-0.15
P0AB91	AROG_ECOLI	-0.47
P05637	APAH_ECOLI	0.68
P69874	POTA_ECOLI	0.4
P0A9Q5	ACCD_ECOLI	0.05
P0AE12	AMN_ECOLI	0.42
P00804	LSPA_ECOLI	-0.8
P77374	YNFE_ECOLI	2.09
P77791	MAA_ECOLI	0.02
P0ABR9	MHPB_ECOLI	0.36
P16659	SYP_ECOLI	1.1
P75959	NAGK_ECOLI	0.92
P39368	YJHQ_ECOLI	1
P0A9H3	LDCI_ECOLI	0.8
Q46843	YGHS_ECOLI	-0.8
P77485	CUSS_ECOLI	0.29
P42620	YQJG_ECOLI	0.15
P0ABA0	ATPF_ECOLI	-1.18
P31679	YAAU_ECOLI	0.07
P76220	YDJY_ECOLI	0.06
P41442	GSPG_ECOLI	0.67
P37339	LHGO_ECOLI	0.08
P0A6H1	CLPX_ECOLI	0.37
Q46925	CSDA_ECOLI	-0.18
P0AFC7	NUOB_ECOLI	-0.47
P75783	YBIO_ECOLI	0.52
P30844	BASS_ECOLI	-0.4
P0ADC3	LOLC_ECOLI	0.21
P39381	YJIJ_ECOLI	-0.16
P16687	PHNI_ECOLI	0.3
P0AAC0	USPE_ECOLI	-1.31
P37672	DLGD_ECOLI	-0.27
P09152	NARG_ECOLI	2.23
P0A9J0	RNG_ECOLI	-0.65
Q47539	TAUC_ECOLI	-0.98
P07363	CHEA_ECOLI	0.13
P77348	MPPA_ECOLI	0.56
P33195	GCSP_ECOLI	0.6
P62723	YEIH_ECOLI	-0.45
P80644	SSUE_ECOLI	-0.73
P75958	LOLE_ECOLI	-0.85
P29012	ALR2_ECOLI	0.4
P76142	LSRB_ECOLI	0.47
P0A7D1	PTH_ECOLI	-0.53
P69783	PTGA_ECOLI	-0.36
P13035	GLPD_ECOLI	-0.22
P75920	OPGC_ECOLI	-0.8
P0CE53	INSH6_ECOLI	-1.23
P0ADA3	NLPD_ECOLI	0.95
P33029	YEIQ_ECOLI	-0.35
P0A8G6	NQOR_ECOLI	1.11
P69908	DCEA_ECOLI	-0.08
P30745	MOAA_ECOLI	-0.01
P64429	YPFJ_ECOLI	1.98
P0A6Q3	FABA_ECOLI	-0.4
P15640	PUR2_ECOLI	1.06
P77423	HYFH_ECOLI	0.3
P0AEA2	CSGG_ECOLI	0.78
P06992	RSMA_ECOLI	-0.5
P65643	EUTT_ECOLI	-1.17
P07004	PROA_ECOLI	0.3
P33355	YEHS_ECOLI	-1.33
P37340	MDTK_ECOLI	-0.01
P77334	GMR_ECOLI	-0.37
P10805	ENVY_ECOLI	-0.99
P25526	GABD_ECOLI	0.07
P37671	YIAJ_ECOLI	-1.51
P50466	AER_ECOLI	-1.24
P16686	PHNH_ECOLI	-0.83
P19769	INSK_ECOLI	-0.53
P0AAX8	YBIS_ECOLI	-0.17
P27127	RFAB_ECOLI	-0.98
P31473	RAVA_ECOLI	-1.54
P0A6U5	RSMG_ECOLI	-0.37
P37665	YIAD_ECOLI	-0.42
P45539	FRLA_ECOLI	0.04
Q46834	YGHF_ECOLI	-0.65
P26648	FTSP_ECOLI	0.69
P0CE52	INSH4_ECOLI	-1.36
P63204	GADE_ECOLI	-1.86
P77561	YDEP_ECOLI	0.58
P75955	YCFT_ECOLI	-1.45
P14407	FUMB_ECOLI	-0.08
P13039	FES_ECOLI	-0.24
P38392	SIEB_ECOLI	-1.08
P31574	FIXB_ECOLI	-0.72
P0A6J1	CYSC_ECOLI	0.05
P0AGI4	XYLH_ECOLI	0.37
P75916	YCDZ_ECOLI	-0.98
P77179	RSXE_ECOLI	-0.91
P77306	YQIK_ECOLI	0.69
P0AAY6	YBJN_ECOLI	-0.44
P0ACB4	HEMG_ECOLI	-2.15
P77434	ALAC_ECOLI	-0.32
Q46942	YQEI_ECOLI	-0.84
P0A9B6	E4PD_ECOLI	-0.59
P75818	YBJP_ECOLI	-0.86
P0CF28	INSB5_ECOLI	0.12
P21507	SRMB_ECOLI	0.05
P00887	AROH_ECOLI	-0.53
P0AEC5	BARA_ECOLI	1.03
P25906	YDBC_ECOLI	-0.22
P37646	YHJH_ECOLI	-0.74
P77172	YFGF_ECOLI	0.18
P0AC05	FLIP_ECOLI	-0.22
P0A9S7	LIVG_ECOLI	0.06
P45541	FRLC_ECOLI	-0.16
P0A847	TGT_ECOLI	0.71
P0AEG1	DPPC_ECOLI	-1.16
P46891	COF_ECOLI	0.33
P0A6W5	GREA_ECOLI	-0.41
P00892	ILVG_ECOLI	1.05
P08331	CPDB_ECOLI	1.11
P38489	NFSB_ECOLI	-1.49
P08839	PT1_ECOLI	0.54
P0AER5	GLTK_ECOLI	-1.24
P0C0L2	OSMC_ECOLI	-0.07
P0ABT5	DUSB_ECOLI	-1.06
P32712	NRFG_ECOLI	-2.58
P77425	ALLC_ECOLI	0.3
P39199	PRMB_ECOLI	-0.19
P0ABA4	ATPD_ECOLI	-1.02
P37627	YHIJ_ECOLI	1.5
P77717	YBAY_ECOLI	0.19
P0AFV4	MEPS_ECOLI	-0.9
P27254	ARGK_ECOLI	-0.93
P37772	YJFF_ECOLI	-0.08
P76064	YDAT_ECOLI	-3.19
P77625	YFBT_ECOLI	0.3
P32709	NRFD_ECOLI	-0.66
P06988	HISX_ECOLI	0.56
P09980	REP_ECOLI	-0.65
P0A9M2	HPRT_ECOLI	-0.04
P0AFF4	NUPG_ECOLI	-0.92
P25888	RHLE_ECOLI	1.29
P42907	AGAS_ECOLI	-0.22
P45748	TSAC_ECOLI	-0.49
Q47154	LAFU_ECOLI	-0.98
P0A784	ORN_ECOLI	-2.03
P11290	YIBD_ECOLI	-0.64
P32701	YJCC_ECOLI	0.56
P46130	YBHC_ECOLI	0.45
P77260	YDFI_ECOLI	-0.59
P0AE18	MAP1_ECOLI	-0.17
P0A8B2	YFCN_ECOLI	-1.18
P0AFT2	YECS_ECOLI	-2.12
P52048	YGGP_ECOLI	0.45
P0AA99	YAFK_ECOLI	0.06
P76639	YGEH_ECOLI	-0.63
P31119	AAS_ECOLI	0.32
P0AGK1	UBIA_ECOLI	-0.85
P0A6V1	GLGC_ECOLI	0.12
P75791	YBIU_ECOLI	-0.09
P0AFB5	NTRB_ECOLI	-0.02
P0A8W0	NANR_ECOLI	-1.15
P77212	RCLA_ECOLI	0.09
P0AFU2	YFBS_ECOLI	0.59
P75961	YCFZ_ECOLI	-1.19
P76261	ADRB_ECOLI	0.32
P0A786	PYRB_ECOLI	-0.48
P09373	PFLB_ECOLI	0.46
P0A9K3	PHOL_ECOLI	-0.71
P06709	BIRA_ECOLI	-0.92
P37052	YCHJ_ECOLI	1.03
P0ADJ8	YIAA_ECOLI	-1.76
P77588	YDEQ_ECOLI	1.9
P19624	PDXA_ECOLI	-0.24
P0A705	IF2_ECOLI	1.94
P76077	PAAA_ECOLI	0.74
P0AC13	DHPS_ECOLI	0.14
P0AEX3	KGTP_ECOLI	1.19
P0A7F6	SPED_ECOLI	-0.69
P31062	NOHD_ECOLI	-0.36
P0AEX9	MALE_ECOLI	-0.07
P27298	OPDA_ECOLI	1.15
Q46820	YGFT_ECOLI	0.81
P0ABG4	FTSW_ECOLI	-0.92
P37629	YHIL_ECOLI	0.96
P46482	AAEA_ECOLI	-0.55
Q46795	YGEO_ECOLI	-0.89
P11072	LIT_ECOLI	-1.63
P62620	ISPG_ECOLI	0.36
P31463	YIDZ_ECOLI	-0.64
P76062	RACR_ECOLI	-1.33
P31129	YDEH_ECOLI	-0.88
P0AGC7	SMP_ECOLI	-0.88
P23538	PPSA_ECOLI	0.85
P77549	YFCJ_ECOLI	0.96
P0AFP0	YADS_ECOLI	-0.57
P09551	ARGT_ECOLI	0.64
P0ACJ5	DECR_ECOLI	-0.23
P24252	YBGA_ECOLI	-0.42
P39333	BDCA_ECOLI	0.22
P56580	PTHB_ECOLI	0.08
P0A912	PAL_ECOLI	-0.47
P71229	HYFR_ECOLI	1.17
P23003	TRMA_ECOLI	-1
P27278	NADR_ECOLI	-0.35
P08394	RECB_ECOLI	0.21
P77444	SUFS_ECOLI	-0.01
P30125	LEU3_ECOLI	0.98
P0A901	BLC_ECOLI	0.56
P38054	CUSA_ECOLI	0.49
P52133	YFJR_ECOLI	-0.45
P0CF60	INSD8_ECOLI	-0.06
P77493	YDJH_ECOLI	-0.32
Q46915	GUDX_ECOLI	0.72
P15032	RECE_ECOLI	1.21
P30015	LHR_ECOLI	1.44
P77180	YKGH_ECOLI	-0.7
P0ACU0	YBIH_ECOLI	-1.5
P37355	MENH_ECOLI	0.5
P39389	YJIR_ECOLI	0.22
P37767	YFHH_ECOLI	-1.44
P46859	GNTK_ECOLI	-0.36
P0AG20	RELA_ECOLI	-0.53
P0A9F1	MNTR_ECOLI	-0.87
P39353	YJHC_ECOLI	-0.63
P0C0U4	RIMK_ECOLI	-0.66
P0ACA7	GSTB_ECOLI	-1.2
P0A7A7	PLSB_ECOLI	0.59
P0ADK6	YIBA_ECOLI	-0.98
P77302	YDAM_ECOLI	-0.83
P0AF96	TABA_ECOLI	-0.59
P76190	MEPH_ECOLI	-0.69
P0A9H5	BTUR_ECOLI	-0.02
P0AF32	NARV_ECOLI	-0.29
P77747	OMPN_ECOLI	4.02
P0A7X6	RIMM_ECOLI	-1.36
P77328	YBBY_ECOLI	0.94
P76486	YFBP_ECOLI	0.3
P60723	RL4_ECOLI	0.4
P76543	YFFL_ECOLI	0.17
P77488	DXS_ECOLI	0.86
P77802	ECPC_ECOLI	2.25
P23325	ARPA_ECOLI	-0.62
P0A7Z4	RPOA_ECOLI	-0.1
P32134	YIHM_ECOLI	-0.03
P13738	NHAA_ECOLI	-0.74
P0ACU7	YJDC_ECOLI	-1.75
P76201	YDIQ_ECOLI	-0.95
P15877	DHG_ECOLI	1.45
P0A6I6	COAD_ECOLI	-1.43
P76177	YDGH_ECOLI	0.58
P62395	SECM_ECOLI	-0.29
P08401	CREC_ECOLI	0.47
P39288	QUEG_ECOLI	-0.26
P0A8Y1	YJJG_ECOLI	-0.73
P32705	ACTP_ECOLI	0.7
P25737	LYSP_ECOLI	-0.04
P0AC23	FOCA_ECOLI	-0.56
P0A6P5	DER_ECOLI	1.06
P37652	BCSB_ECOLI	1.32
P05458	PTRA_ECOLI	-0.24
P77656	YFDK_ECOLI	-0.45
P42592	YGJK_ECOLI	1.31
P0AFS7	YDIK_ECOLI	-0.78
P16689	PHNM_ECOLI	0.02
P76186	YDHK_ECOLI	-0.76
P37640	YHJB_ECOLI	-1.5
P33359	YEHW_ECOLI	-1.2
P0ADF6	EDD_ECOLI	0.42
Q46802	YGEV_ECOLI	0.03
P37329	MODA_ECOLI	-0.26
P0A6Y5	HSLO_ECOLI	0.02
P77768	YFCI_ECOLI	-1.32
P75931	YCEM_ECOLI	0.39
P0AFU4	GLRR_ECOLI	0.05
P69786	PTGCB_ECOLI	1.22
P24205	LPXM_ECOLI	0.28
P37182	HYBD_ECOLI	-0.29
P42913	YRAH_ECOLI	0
P0AFT5	YEHT_ECOLI	0.16
P0A754	KEFF_ECOLI	-0.37
P33222	YJFC_ECOLI	0.7
P10371	HIS4_ECOLI	-0.13
P71311	YAIS_ECOLI	-1.21
P45428	DCUD_ECOLI	-0.32
P76641	GUAD_ECOLI	-0.75
P32136	YIHO_ECOLI	0.72
P0A9F9	METR_ECOLI	-0.35
P22186	MRAZ_ECOLI	-0.84
P0A9D8	DAPD_ECOLI	-0.12
P69506	YTFE_ECOLI	-0.2
P0AD59	IVY_ECOLI	-0.9
P08373	MURB_ECOLI	-0.04
P36667	WBBL_ECOLI	0.12
P77858	HYFC_ECOLI	-0.46
P76393	YEGI_ECOLI	0.14
P76459	ATOA_ECOLI	0.32
P75870	YCCS_ECOLI	-0.47
P77467	PAAG_ECOLI	-0.34
P37686	ADH2_ECOLI	-0.39
P30126	LEUD_ECOLI	0.27
P76213	CHO_ECOLI	1.05
P0A8A0	YEBC_ECOLI	0.36
P0ABV2	EXBD_ECOLI	-0.84
P21189	DPO2_ECOLI	1.34
P0AFI0	OXC_ECOLI	0.81
P0AE85	CPXP_ECOLI	-0.44
P0A9X1	ZNUC_ECOLI	0.21
P76100	YDCK_ECOLI	0.35
P00452	RIR1_ECOLI	1.18
P0AAH8	SAPF_ECOLI	-0.26
P05847	TTDA_ECOLI	0.5
P43319	YRAK_ECOLI	1.2
P06983	HEM3_ECOLI	-0.77
P0C7L2	PAAJ_ECOLI	-0.18
P32057	WCAI_ECOLI	0.17
P0ABB4	ATPB_ECOLI	0.74
P0ACM2	RSPR_ECOLI	-0.85
P42601	ALX_ECOLI	-1.23
P21889	SYD_ECOLI	0.43
P19318	NARY_ECOLI	0.66
P0A6A6	LEUC_ECOLI	0.6
P0ACL7	LLDR_ECOLI	-1.23
P0AFZ1	SSEB_ECOLI	-1.07
P23837	PHOQ_ECOLI	-1.05
P0ADI7	YECD_ECOLI	-0.96
P07648	RECC_ECOLI	0.73
P0AG67	RS1_ECOLI	-0.33
Q46810	MOCA_ECOLI	-1.28
P0AG38	RHTC_ECOLI	-0.93
P0A8I8	RLMH_ECOLI	-0.75
P0CF82	INSF4_ECOLI	-0.54
P0A769	MNTH_ECOLI	-0.31
P0AFV0	YIBH_ECOLI	-0.28
P33342	YEHC_ECOLI	-0.32
P0ADX7	YHHA_ECOLI	0.5
P14900	MURD_ECOLI	0.07
P33594	NIKE_ECOLI	0.23
Q46821	UACT_ECOLI	0.43
P02359	RS7_ECOLI	-0.69
P76149	SAD_ECOLI	0.09
P0ACC7	GLMU_ECOLI	1.09
P39376	YJIE_ECOLI	-0.77
P0AAK7	NRFC_ECOLI	0.55
P0AG71	RMUC_ECOLI	-0.54
P0A8G0	UVRC_ECOLI	0.37
P37617	ATZN_ECOLI	2.11
P0AE78	CORC_ECOLI	-0.45
P0AAA1	YAGU_ECOLI	-0.64
P09029	PURK_ECOLI	0.1
P0AGE9	SUCD_ECOLI	0.59
P00894	ILVH_ECOLI	-0.53
P39830	YBAL_ECOLI	-0.74
Q46907	YGCQ_ECOLI	-0.29
P78271	YFES_ECOLI	0.33
P0AAW1	YBHP_ECOLI	0.95
P0A749	MURA_ECOLI	0.44
P17410	CHBR_ECOLI	-0.13
P76573	YFGI_ECOLI	-1.56
P77381	DJLB_ECOLI	-0.54
P0ACI6	ASNC_ECOLI	-1.83
P0A6M4	DTD_ECOLI	1.15
P33913	YEJA_ECOLI	1.37
P0A7C2	LEXA_ECOLI	-0.96
P32151	YIIG_ECOLI	-0.63
P17846	CYSI_ECOLI	1.03
P0A9V1	LPTB_ECOLI	0.91
P76090	YNBA_ECOLI	-1.28
P0AC26	NIRC_ECOLI	-0.52
P0AGD3	SODF_ECOLI	0.11
P38055	YDJE_ECOLI	-0.03
P00895	TRPE_ECOLI	2
P0ABR7	YEAW_ECOLI	1.81
P28369	RFH_ECOLI	1.62
P32716	MDTN_ECOLI	0.01
P0A6G5	CITX_ECOLI	-1.2
P68398	TADA_ECOLI	-1.32
P0A9P4	TRXB_ECOLI	0.87
P77522	SUFB_ECOLI	0.24
P39399	LGOR_ECOLI	-0.62
P39356	YJHU_ECOLI	-0.81
P0AEM0	FKBX_ECOLI	-0.35
P37643	YHJE_ECOLI	0.17
P77439	PTFX1_ECOLI	0.9
P55798	PRP1_ECOLI	-0.1
P76290	CMOA_ECOLI	-0.08
P28629	ADIA_ECOLI	0.97
P37440	UCPA_ECOLI	-0.57
P60872	YIDE_ECOLI	-0.14
P0AFM2	PROX_ECOLI	-0.5
P42628	DLST_ECOLI	-0.76
P0A9V8	SQUU_ECOLI	-0.6
P0A766	RSXA_ECOLI	-1.25
P77789	YDES_ECOLI	-0.02
P38097	YEGE_ECOLI	-0.15
P07654	PSTA_ECOLI	-0.62
P0AEY1	MARC_ECOLI	-0.9
Q46898	CAS5_ECOLI	-0.89
P39408	YJJV_ECOLI	0.58
P0AD42	PGPC_ECOLI	-1.3
P63340	YQEG_ECOLI	-1.01
P05523	FPG_ECOLI	0.97
P05194	AROD_ECOLI	-0.41
P0CF80	INSF2_ECOLI	-0.54
Q46904	YGCN_ECOLI	0.21
P0AEE3	DEGS_ECOLI	0.25
P39336	YJGL_ECOLI	0.17
P30139	THIG_ECOLI	-0.55
P0AE14	AMPE_ECOLI	-1.86
P05804	BGLR_ECOLI	0.34
P0AC51	ZUR_ECOLI	-0.86
P25539	RIBD_ECOLI	0.39
P33024	PSUT_ECOLI	0.06
P76298	FLHA_ECOLI	0.59
P69741	MBHT_ECOLI	2.17
P0AA97	YAEQ_ECOLI	-2.28
P0A7J3	RL10_ECOLI	-1.54
P39411	NCPP_ECOLI	0.07
P0ACS5	ZNTR_ECOLI	-1.72
P09148	GAL7_ECOLI	1.78
P75862	ZAPC_ECOLI	-1.11
P76214	VES_ECOLI	0.02
P0A877	TRPA_ECOLI	-0.86
P0A6P1	EFTS_ECOLI	-0.25
P75750	YBGQ_ECOLI	2.1
P52062	YGGW_ECOLI	1.09
P0ABS1	DKSA_ECOLI	-1.71
P00811	AMPC_ECOLI	-0.43
P0CK95	ACFD_ECOLI	4.04
P25772	LIGB_ECOLI	-0.53
P0CF56	INSD4_ECOLI	0.16
P0AES4	GYRA_ECOLI	0.27
P18392	RSTB_ECOLI	0.45
P0AC33	FUMA_ECOLI	0.03
Q46901	CSE1_ECOLI	-0.21
P43337	NUDL_ECOLI	-0.52
P75682	YAGE_ECOLI	-0.46
P45804	YHGE_ECOLI	-0.32
P0ABH0	FTSA_ECOLI	2.42
P31468	CBRB_ECOLI	-0.47
Q06067	ATOS_ECOLI	0.56
P0AFQ2	YBHS_ECOLI	-0.4
P32171	RHAB_ECOLI	0.15
P04995	EX1_ECOLI	0.5
P38506	XNI_ECOLI	-0.02
P0AF43	YJBB_ECOLI	-0.46
P0CF83	INSF5_ECOLI	-0.54
Q47146	FADE_ECOLI	0.69
P77375	YDHX_ECOLI	-0.77
P0A9H1	MUG_ECOLI	-0.83
Q46791	YGEK_ECOLI	-0.34
P75980	BEEE_ECOLI	-1.18
P0A9I3	GCVR_ECOLI	-0.95
P16917	RHSB_ECOLI	1.66
P0ABC9	BETT_ECOLI	0.01
P19768	INSJ_ECOLI	0.62
P03959	KDPA_ECOLI	1.27
P45475	YHBV_ECOLI	-0.57
P75858	ELFG_ECOLI	1.35
Q46807	ARCL_ECOLI	-1.07
P29744	FLGL_ECOLI	-0.21
P0A9A6	FTSZ_ECOLI	0.14
P0ADE8	YGFZ_ECOLI	-0.67
P0AB24	EFEO_ECOLI	-1.1
P0A6I0	KCY_ECOLI	-1.7
P21888	SYC_ECOLI	0.7
P0AG03	UBIX_ECOLI	-1.35
P0AE30	ARTM_ECOLI	-1.33
P76216	ASTB_ECOLI	0.81
P0ACY3	YEAG_ECOLI	-0.13
Q47536	YAIP_ECOLI	0.32
Q47538	TAUB_ECOLI	-0.27
P31462	MDTL_ECOLI	-0.85
P19319	NARZ_ECOLI	2.06
Q46871	YQJH_ECOLI	0.28
P0AFJ7	PITA_ECOLI	-0.52
P0CF79	INSF1_ECOLI	-0.54
P52006	NUDI_ECOLI	-0.93
P25745	MNMA_ECOLI	-0.06
P32669	FSAB_ECOLI	-1.69
P11553	FUCK_ECOLI	-0.95
P15078	CSTA_ECOLI	-0.28
P77161	GLXR_ECOLI	-0.52
P02924	ARAF_ECOLI	-0.22
P0A9M5	XGPT_ECOLI	-0.19
P75913	GHRA_ECOLI	-0.44
P20605	FIC_ECOLI	-1.84
P19642	PTOCB_ECOLI	-0.09
P32137	YIHP_ECOLI	0.49
P77562	YAIW_ECOLI	0.48
P25798	FLIF_ECOLI	0.78
P75982	YMFQ_ECOLI	2.5
P77433	YKGG_ECOLI	-1.55
P37623	ACPT_ECOLI	-0.86
P26612	AMY2_ECOLI	1.88
P68767	AMPA_ECOLI	-0.31
P0AAF3	ARAG_ECOLI	0.06
P76079	PAAC_ECOLI	-1.09
P62517	OPGH_ECOLI	-0.02
P39453	TORS_ECOLI	-0.21
P39206	CAIE_ECOLI	2.13
P0A715	KDSA_ECOLI	0.29
P75919	CLSC_ECOLI	-0.18
P45544	FRLR_ECOLI	-0.51
P39321	TAMB_ECOLI	1.11
P00944	XYLA_ECOLI	0.67
P32051	YDEK_ECOLI	2.25
P0C0L7	PROP_ECOLI	0.01
P45565	AIS_ECOLI	-1.19
P76340	YEDW_ECOLI	-1.59
P0AB26	YCEB_ECOLI	-1.42
Q46799	XDHA_ECOLI	1.31
P08956	T1RK_ECOLI	0.89
P76507	YFDI_ECOLI	-0.04
P21499	RNR_ECOLI	1.34
P39829	GARD_ECOLI	0.59
P75839	YCAP_ECOLI	-0.38
P76264	MNTP_ECOLI	-0.82
P76017	YCGV_ECOLI	3.09
P75715	SFMH_ECOLI	-0.19
P33644	YFIH_ECOLI	0.24
P76520	YFDX_ECOLI	-1.52
P37648	YHJJ_ECOLI	-0.93
P0ABP3	DCUC_ECOLI	-1.17
P76257	YOAA_ECOLI	-0.23
P0AFB1	NLPI_ECOLI	1.04
P0ADD7	YJJQ_ECOLI	-0.33
P0AAS0	YLAC_ECOLI	-2.64
P08200	IDH_ECOLI	0.23
P46481	AAEB_ECOLI	-1
P25549	ASLA_ECOLI	1.55
P17993	UBIG_ECOLI	-1.05
P13857	RIML_ECOLI	-1.1
P39396	YJIY_ECOLI	0.45
P60757	HIS1_ECOLI	-0.03
P60869	YBJL_ECOLI	0.01
P77779	YBFO_ECOLI	1.43
P37681	YIAT_ECOLI	-0.59
P77339	YAFT_ECOLI	-0.78
P75856	ELFD_ECOLI	0.57
P0AFG8	ODP1_ECOLI	0.69
P0ADS9	YGGN_ECOLI	0.39
P76561	YPFH_ECOLI	0.97
P21151	FADA_ECOLI	-0.6
P68567	RSMJ_ECOLI	-0.74
P0AAC6	YCCA_ECOLI	-0.24
P46854	YHHY_ECOLI	-1.6
Q47138	YDFE_ECOLI	-0.59
P09378	RHAR_ECOLI	-0.61
P77187	YAHF_ECOLI	0.52
P76273	RSMF_ECOLI	-0.14
P0A6U8	GLGA_ECOLI	0.6
P0AE45	YTFL_ECOLI	-0.67
P31466	ADEP_ECOLI	-0.44
P0ADP7	UBIJ_ECOLI	-1.54
P0A6C8	ARGB_ECOLI	-1.05
P0AA80	GARP_ECOLI	0.05
P37306	ARCC_ECOLI	-0.69
P28634	TRMO_ECOLI	0.07
P05041	PABB_ECOLI	-0.1
P65367	YQCA_ECOLI	-1.03
P0AE74	CITT_ECOLI	0.83
P0ACQ7	TDCA_ECOLI	-0.36
P37902	GLTI_ECOLI	-0.9
P38104	RSPA_ECOLI	-1.01
P33136	OPGG_ECOLI	0.97
P0ABC7	HFLK_ECOLI	4.34
Q7DFU6	YGHX_ECOLI	0.25
P31058	YADC_ECOLI	1.85
P10151	LEUO_ECOLI	-0.66
P14175	PROV_ECOLI	-0.36
P77245	MURR_ECOLI	-0.63
P0ABS5	DNAG_ECOLI	1.33
P76445	LPXT_ECOLI	-0.44
P0A7B3	NADK_ECOLI	-0.32
P0AF01	MODB_ECOLI	-0.59
P0AFP9	YBHR_ECOLI	-0.75
P45508	YFAL_ECOLI	2.74
P0A9L3	FKBB_ECOLI	0.71
P0AGI8	TRKA_ECOLI	0.49
P33354	YEHR_ECOLI	-1.76
P0A908	MIPA_ECOLI	1.45
Q47622	SAPA_ECOLI	0.37
P77389	YDHP_ECOLI	-0.45
P0AD12	YEEZ_ECOLI	-0.7
P67662	AAER_ECOLI	-0.66
P69367	MDTH_ECOLI	-0.05
P31548	THIQ_ECOLI	-0.69
P13033	GLPB_ECOLI	0.27
P39276	DTPC_ECOLI	-0.76
P07014	SDHB_ECOLI	0.63
P0CE54	INSH7_ECOLI	-1.36
P77234	YBEQ_ECOLI	-0.04
P0C8J6	GATY_ECOLI	-1.26
P0AAF6	ARTP_ECOLI	0.25
P27829	WECC_ECOLI	-0.76
Q47208	FDRA_ECOLI	0.75
P13669	MNGR_ECOLI	-1.96
P0ABJ9	CYDA_ECOLI	-0.15
P24207	PHEP_ECOLI	-0.01
P11291	Y3808_ECOLI	0.48
P37056	YAEF_ECOLI	-0.32
P0AC96	GNTU_ECOLI	-0.21
Q47155	DPO4_ECOLI	-0.84
P0A7E5	PYRG_ECOLI	0.41
P77481	YCJV_ECOLI	0.54
P75685	RCLC_ECOLI	-0.71
P75978	YMFN_ECOLI	-0.4
P31135	POTH_ECOLI	-1.42
P03961	KDPC_ECOLI	0.51
P77181	PAAY_ECOLI	1.06
P37147	FXSA_ECOLI	1.39
P76066	YDAW_ECOLI	0.14
P0A7B1	PPK_ECOLI	-0.12
P37745	RMLC_ECOLI	-0.73
P15254	PUR4_ECOLI	1.04
P37769	KDUD_ECOLI	-0.92
P76464	YFAS_ECOLI	0.55
P0AB58	LAPB_ECOLI	-1.27
P45470	YHBO_ECOLI	0.07
P32688	YJBG_ECOLI	0.28
P0AFR0	RSSA_ECOLI	-1.23
P0ACJ0	LRP_ECOLI	-1.41
P05827	ILVY_ECOLI	-0.04
P76508	YFDL_ECOLI	0.51
P00803	LEP_ECOLI	1.37
P00634	PPB_ECOLI	0.66
P0AEZ3	MIND_ECOLI	-0.19
P0A9A9	FUR_ECOLI	-1.26
P0A6N8	EFPL_ECOLI	-0.4
P12996	BIOB_ECOLI	-0.19
P07395	SYFB_ECOLI	0.14
P52627	FLIZ_ECOLI	-1.26
P76115	YNCD_ECOLI	3.3
P36999	RLMA_ECOLI	-0.54
P0A6T5	GCH1_ECOLI	-1.3
P23869	PPIB_ECOLI	-0.32
P32664	NUDC_ECOLI	-0.3
P75882	GFCD_ECOLI	1.78
P0AF52	GHXP_ECOLI	-0.45
P23256	MALY_ECOLI	0.79
P37330	MASZ_ECOLI	0
P10906	UGPE_ECOLI	-1.05
P0AAD2	MTR_ECOLI	-0.16
P39342	YJGR_ECOLI	-0.23
P09184	VSR_ECOLI	-0.05
P0A7H3	RECO_ECOLI	0.8
P16926	MREC_ECOLI	0.34
P0ACS9	ACRR_ECOLI	0.39
P24188	YCEA_ECOLI	-0.48
P0ADI9	YHHN_ECOLI	-1.23
Q47688	YKFC_ECOLI	-0.47
P0AFY2	SANA_ECOLI	-0.51
P0A9P6	DEAD_ECOLI	2.92
P0AAK4	HYDN_ECOLI	-0.34
P76037	PUUP_ECOLI	-0.54
P23482	HYFB_ECOLI	-0.98
P23878	FEPC_ECOLI	-0.63
P37146	RIR4_ECOLI	0.03
P0A932	GFCE_ECOLI	0.03
P0AEZ1	METF_ECOLI	-0.68
P77324	YAGS_ECOLI	-0.65
P0A959	ALAA_ECOLI	-0.57
P56259	YIFN_ECOLI	0.41
P69805	PTND_ECOLI	-0.78
P0ACD8	MBHL_ECOLI	0.83
P42590	YGJI_ECOLI	-0.21
Q46927	TCDA_ECOLI	-0.27
P02925	RBSB_ECOLI	-0.71
P00956	SYI_ECOLI	0.94
P77509	YPHE_ECOLI	0.13
P23930	LNT_ECOLI	0.94
P27240	RFAY_ECOLI	-1.34
P76116	YNCE_ECOLI	-0.76
P02943	LAMB_ECOLI	0.82
P0AG16	PUR1_ECOLI	0.04
P0DMC9	RCSA_ECOLI	0.15
P21165	PEPQ_ECOLI	0.4
P45546	YHFT_ECOLI	-1.36
P75764	YBHJ_ECOLI	1.01
P77280	YDJJ_ECOLI	1.94
P08201	NIRB_ECOLI	1.03
P52139	YFJX_ECOLI	0.27
P77188	ECPB_ECOLI	-0.48
P45537	YHFK_ECOLI	-0.56
P77211	CUSC_ECOLI	-0.11
P0ACN7	CYTR_ECOLI	-1.3
P36561	COBS_ECOLI	0.21
P06960	OTC2_ECOLI	-0.82
P24177	ACRD_ECOLI	1.24
Q46808	YQEB_ECOLI	0.43
P25524	CODA_ECOLI	-0.37
P0AFG6	ODO2_ECOLI	0.15
P08190	FIMG_ECOLI	-0.07
P28246	BCR_ECOLI	-0.46
P23886	CYDC_ECOLI	-0.27
P0AB71	ALF_ECOLI	0.22
P39277	YJEH_ECOLI	-1.04
P25531	YICR_ECOLI	-0.91
P11864	YHAC_ECOLI	-0.02
P0AAG5	MDLB_ECOLI	-0.43
P36672	PTTBC_ECOLI	-0.16
P0ABR5	HCAE_ECOLI	1.08
P75780	FIU_ECOLI	2.08
P0AE82	CPXA_ECOLI	0.03
P0A796	PFKA_ECOLI	0.62
P0AG78	SUBI_ECOLI	-0.59
P0A9A2	FTNB_ECOLI	-0.83
P0A7H6	RECR_ECOLI	-0.58
P0AGI1	RBSC_ECOLI	-0.16
P0ACR4	YEIE_ECOLI	-0.2
P64572	YGHR_ECOLI	-0.47
P24174	MANC_ECOLI	0.65
P75749	YBGP_ECOLI	1.36
P19323	FHLA_ECOLI	0.42
P76463	YFAQ_ECOLI	1.45
Q47005	NAC_ECOLI	-0.99
P45524	YHET_ECOLI	-0.65
P77544	YFCF_ECOLI	0.11
P75757	ZITB_ECOLI	-1.45
P0ACV6	MPAA_ECOLI	-0.73
P29208	MENC_ECOLI	-0.8
P76217	ASTD_ECOLI	0.33
P77538	YFHR_ECOLI	0.29
P0A8X4	YCCT_ECOLI	-0.75
P76655	YQIG_ECOLI	2.74
P76373	UDG_ECOLI	0.17
P0AFD6	NUOI_ECOLI	-0.5
P0AAT9	YBEL_ECOLI	0.36
P37662	YHJX_ECOLI	-0.74
P45523	FKBA_ECOLI	0.76
P40719	QSEC_ECOLI	1.74
P33591	NIKB_ECOLI	-0.44
P37641	YHJC_ECOLI	0.29
P76369	YEEY_ECOLI	-0.21
P64599	YHBT_ECOLI	-1.61
P0A6L2	DAPA_ECOLI	-0.19
P39314	YTFF_ECOLI	-1.43
P37344	PSPF_ECOLI	-0.09
P0ABU0	MENB_ECOLI	0.25
P16676	CYSA_ECOLI	0.41
P27896	NARQ_ECOLI	0.24
P0A7E9	PYRH_ECOLI	-0.74
P0AFH6	OPPC_ECOLI	0.16
P45767	YHDX_ECOLI	-0.08
P37664	YIAC_ECOLI	-1.83
P77615	YCJW_ECOLI	-0.7
P0A830	DCTA_ECOLI	-1.04
P0AA76	DGOT_ECOLI	-0.26
P33218	YEBE_ECOLI	0.03
P0AEY3	MAZG_ECOLI	-1.08
P0AET5	HDED_ECOLI	-1.42
P0A712	KDGT_ECOLI	-0.73
P32132	TYPA_ECOLI	1.55
P0A805	RRF_ECOLI	0.67
P36548	AMIA_ECOLI	0.12
P75697	YAIX_ECOLI	0.15
P27247	PLSX_ECOLI	-1.09
P77294	YDER_ECOLI	-0.2
P78055	FSAA_ECOLI	-1.23
P36943	EAEH_ECOLI	1.01
P0AF24	NAGD_ECOLI	-0.12
P15286	FLK_ECOLI	-0.22
P78061	PUUA_ECOLI	0.21
P71244	WCAM_ECOLI	0.96
P03819	KEFC_ECOLI	-0.09
P37689	GPMI_ECOLI	-0.35
P39282	YJEM_ECOLI	0.22
P37647	KDGK_ECOLI	-0.89
P09394	GLPQ_ECOLI	-0.86
P45395	KDSD_ECOLI	-0.31
P0A9J6	RBSK_ECOLI	1.11
P39280	EPMB_ECOLI	-0.46
P0ABE9	CYNT_ECOLI	-0.13
P77279	FETA_ECOLI	-0.86
P76081	PAAE_ECOLI	-0.25
P39208	IDNK_ECOLI	-1.35
P77357	ABGA_ECOLI	1.01
P0A6G3	PNCC_ECOLI	-0.27
P75849	GLO22_ECOLI	-0.32
P52045	SCPB_ECOLI	-0.32
P0AFQ7	YCFH_ECOLI	-1.21
P77319	HSCC_ECOLI	1.18
P27297	BAX_ECOLI	0.41
P27830	RMLB2_ECOLI	-0.54
P10423	IAP_ECOLI	0
P39404	BGLJ_ECOLI	-0.2
P0AA16	OMPR_ECOLI	0.14
P76137	YDET_ECOLI	4.32
P12994	YBHB_ECOLI	1.06
P67087	RSMI_ECOLI	-1.17
P0A9W3	ETTA_ECOLI	1
P76621	CSID_ECOLI	-0.39
P76483	YFBM_ECOLI	0.08
P08400	PHOR_ECOLI	-0.09
P0AFZ3	SSPB_ECOLI	0.92
P0A738	MOAC_ECOLI	-1.51
P00864	CAPP_ECOLI	-0.14
P27302	TKT1_ECOLI	0.83
P75897	RUTB_ECOLI	-0.06
P39306	ULAF_ECOLI	-0.35
P16681	PHNB_ECOLI	-0.6
P76012	YCGY_ECOLI	-1.91
P32684	RLUF_ECOLI	-0.42
P0AAD8	TDCC_ECOLI	-0.51
P07102	PPA_ECOLI	0.31
P46022	MTGA_ECOLI	-0.66
P36881	YADI_ECOLI	-0.56
P0AEU0	HISJ_ECOLI	0.42
P25741	RFAP_ECOLI	-1.22
P39391	YJIT_ECOLI	-0.21
P45549	YHFW_ECOLI	-0.42
P0A996	GLPC_ECOLI	-0.2
P04152	UMUC_ECOLI	-0.01
P42641	OBG_ECOLI	1.07
P27241	RFAZ_ECOLI	-0.33
P69828	PTKA_ECOLI	-1.14
P37749	WBBI_ECOLI	0.48
P67660	YHAJ_ECOLI	-0.29
P08142	ILVB_ECOLI	-0.47
P32125	MOBB_ECOLI	-0.7
P39161	UXUR_ECOLI	-0.51
P25736	END1_ECOLI	0.49
P0ABL1	NRFB_ECOLI	0.33
P05052	APPY_ECOLI	-0.05
P75969	INTE_ECOLI	0.02
P24202	MRR_ECOLI	-0.08
P0ACK8	FUCR_ECOLI	-1.73
P52007	YECM_ECOLI	-0.7
P00935	METB_ECOLI	2.22
P0ACL2	EXUR_ECOLI	-1.21
P39393	YJIV_ECOLI	0.66
P0AGE0	SSB_ECOLI	5.6
P11551	FUCP_ECOLI	-0.41
P0CG19	RNPH_ECOLI	-0.44
P33916	YEJF_ECOLI	-0.36
P0A8K8	YIHY_ECOLI	-0.53
P39384	YJIM_ECOLI	-0.01
P37009	FBPC_ECOLI	0.81
P36771	LRHA_ECOLI	-0.49
P24203	YJIA_ECOLI	-0.76
P37197	YHJA_ECOLI	0.57
P0A8V6	FADR_ECOLI	-0.22
P0ABY4	FLAW_ECOLI	-1.44
P0AFP6	GCH1L_ECOLI	-0.28
P76396	YEGL_ECOLI	-0.69
P77243	PRPD_ECOLI	0.4
P61949	FLAV_ECOLI	-0.63
P77489	YAGR_ECOLI	0.79
P0AG34	RHTB_ECOLI	-1.29
P76143	LSRF_ECOLI	-0.04
P77698	YBCK_ECOLI	0.15
P0AG14	SOHB_ECOLI	-0.39
Q46941	YQEH_ECOLI	-1.85
P77173	ZIPA_ECOLI	0.7
P0ADS6	YGGE_ECOLI	-0.95
P07649	TRUA_ECOLI	0.23
P76537	YFEY_ECOLI	-0.23
P0A7H0	RECF_ECOLI	-0.73
P00350	6PGD_ECOLI	-0.42
P39328	YTFT_ECOLI	-0.66
P0AAI3	FTSH_ECOLI	2.49
P64596	YRAP_ECOLI	-0.38
P45771	YRDD_ECOLI	0.74
P46136	YDDG_ECOLI	-0.98
P36566	CMOM_ECOLI	-0.45
P06282	CDH_ECOLI	-0.28
P27294	INAA_ECOLI	-1.81
P31552	CAIC_ECOLI	0.35
P64634	HOFN_ECOLI	0.45
P67430	NEMR_ECOLI	-1.84
P25714	YIDC_ECOLI	-0.2
P05719	T1SK_ECOLI	0.66
P52613	FLIJ_ECOLI	-2.66
P0A9U1	YBHF_ECOLI	0.98
P32128	YIHF_ECOLI	0.9
P07821	FHUC_ECOLI	-1.08
P69931	HDA_ECOLI	-0.2
P0CF93	INSL3_ECOLI	0.4
P0ADC6	LPTG_ECOLI	-1.01
P39310	YTFB_ECOLI	0.69
P14081	SELB_ECOLI	0.92
P0CF57	INSD5_ECOLI	0.16
P0AFE0	NUOJ_ECOLI	-1.45
P0AD05	YECA_ECOLI	-1.47
P25519	HFLX_ECOLI	-0.37
P0A879	TRPB_ECOLI	1.25
P76269	YEBQ_ECOLI	-0.21
P37744	RMLA1_ECOLI	0.1
P0ADR0	YQAA_ECOLI	-1.65
P17109	MEND_ECOLI	0
P05459	PDXB_ECOLI	-0.01
P75713	ALLE_ECOLI	0.47
P0AFZ5	SULA_ECOLI	-1.12
P45552	YHFZ_ECOLI	0.13
P0A6G7	CLPP_ECOLI	-0.75
P0A6D3	AROA_ECOLI	-0.03
P39386	MDTM_ECOLI	-0.43
P17315	CIRA_ECOLI	2.65
P0AAE2	PROY_ECOLI	0.65
P0AEA8	CYSG_ECOLI	-0.48
P16690	PHNN_ECOLI	-1.6
P0AGB6	RPOE_ECOLI	-0.23
P71298	INTF_ECOLI	-0.01
P76460	ATOE_ECOLI	0.36
P69831	PTKC_ECOLI	-0.21
P71238	WCAD_ECOLI	-0.09
P0AGM7	URAA_ECOLI	0.15
P0A9K7	PHOU_ECOLI	-0.85
P77650	HCAD_ECOLI	-1.06
P52647	NIFJ_ECOLI	2.62
P0A9U8	YDIO_ECOLI	0.14
P28861	FENR_ECOLI	0.06
P77671	ALLB_ECOLI	-0.18
P77607	YAGL_ECOLI	-0.14
P0AAI9	FABD_ECOLI	-0.57
P0AC75	KDTA_ECOLI	-0.74
P0A6U3	MNMG_ECOLI	0.66
P77736	YAHD_ECOLI	-1.29
P27128	RFAI_ECOLI	-0.75
P30147	HYI_ECOLI	1.78
P45955	CPOB_ECOLI	-0.36
P77300	YAGI_ECOLI	-1.24
P04805	SYE_ECOLI	0.9
P08371	PPDB_ECOLI	-0.94
P0AC73	EBGC_ECOLI	-2.39
P33020	YEII_ECOLI	0.44
Q46891	YGBM_ECOLI	-0.82
P33362	YEHZ_ECOLI	-0.4
P0A8L5	YCGN_ECOLI	-1.03
P33595	SGRR_ECOLI	-0.78
P15977	MALQ_ECOLI	0
P30850	RNB_ECOLI	0.46
P37013	NORR_ECOLI	0.29
P30744	SDHM_ECOLI	0.08
P0AEI6	NUDJ_ECOLI	-1.74
P37338	CSIR_ECOLI	-1.6
Q46787	YGEG_ECOLI	-0.65
P69681	AMTB_ECOLI	0.35
P45751	HOFO_ECOLI	-1.55
P0AG55	RL6_ECOLI	-0.05
P33022	RIHB_ECOLI	-0.23
P77169	YAGJ_ECOLI	-1.58
P0AA37	RLUA_ECOLI	0.88
P0AFL9	PQIA_ECOLI	-0.37
P0A6W3	MRAY_ECOLI	-0.27
P16682	PHND_ECOLI	0.5
P03960	KDPB_ECOLI	0.35
P05100	3MG1_ECOLI	-0.89
P76080	PAAD_ECOLI	-0.21
P51024	YAIL_ECOLI	-0.65
P76065	YDAU_ECOLI	0.78
P0AB83	END3_ECOLI	-0.97
P30843	BASR_ECOLI	-2.05
P0AGM5	SIRB1_ECOLI	-0.68
P76042	YCJN_ECOLI	-0.22
P0ACJ8	CRP_ECOLI	-0.54
P16692	PHNP_ECOLI	-0.29
P77398	ARNA_ECOLI	0.38
P0A8N5	SYK2_ECOLI	0.03
P24182	ACCC_ECOLI	1.16
P0AD61	KPYK1_ECOLI	0.05
P0A8X2	YCEI_ECOLI	-0.19
P77570	ANMK_ECOLI	-0.49
P0AFF0	NUON_ECOLI	-0.92
P0A6W9	GSH1_ECOLI	0.39
P0A7J7	RL11_ECOLI	-0.5
P13001	BIOH_ECOLI	-0.42
P0CF88	INSI1_ECOLI	-0.06
P37325	YBCH_ECOLI	-1.13
P0AAP1	ADRA_ECOLI	-0.96
P16918	RHSC_ECOLI	2.12
P0AC02	BAMD_ECOLI	-0.17
P36553	HEM6_ECOLI	1.31
P75817	RLMC_ECOLI	-0.21
P76108	YDCS_ECOLI	1.58
P16701	CYST_ECOLI	-0.7
P0A924	PGPB_ECOLI	-1.61
P0AD01	DCUR_ECOLI	-0.54
P21420	NMPC_ECOLI	1.95
O52982	YFJS_ECOLI	0.05
P77308	DDPB_ECOLI	0.54
P77031	YQCE_ECOLI	-0.15
P06961	CCA_ECOLI	-0.25
P37595	IAAA_ECOLI	1.3
P21369	PNCA_ECOLI	-0.31
P0AFF2	NUPC_ECOLI	-0.98
P77616	YQIH_ECOLI	0.62
P76319	YEDL_ECOLI	-0.34
P45757	GSPC_ECOLI	-0.99
P60664	HIS6_ECOLI	-1.04
P37747	GLF_ECOLI	0.67
P06972	FHUB_ECOLI	-0.24
P12995	BIOA_ECOLI	1.18
P77256	YDJG_ECOLI	0.55
P0AEB0	CYSW_ECOLI	-0.27
P39371	NANM_ECOLI	1.15
P77580	ACDH_ECOLI	-0.9
P76219	YDJX_ECOLI	-1.16
P0A9Q7	ADHE_ECOLI	1.04
P37180	HYBB_ECOLI	0.15
P0AAM1	CYBH_ECOLI	-0.81
P17952	MURC_ECOLI	0.4
P0ACY6	YEAL_ECOLI	-2.34
P42593	FADH_ECOLI	0.3
P36673	TRER_ECOLI	-0.95
P15047	ENTA_ECOLI	-1.31
P0AEH3	ELAA_ECOLI	-0.82
P39264	FIMI_ECOLI	-0.91
P77252	YKGE_ECOLI	-1.29
P26459	APPC_ECOLI	0
P0A9E9	YEIL_ECOLI	-1.08
P0AC47	FRDB_ECOLI	-0.11
P77427	YBEU_ECOLI	-0.63
P26602	UBIC_ECOLI	0.9
P04951	KDSB_ECOLI	-0.72
P75869	SXY_ECOLI	-0.35
P03023	LACI_ECOLI	-0.61
P75906	PGAB_ECOLI	-0.78
P0ACM5	YEGW_ECOLI	-1.43
P0A8F0	UPP_ECOLI	0.24
P02930	TOLC_ECOLI	1.27
P0A935	MLTA_ECOLI	1.56
P0A9B2	G3P1_ECOLI	-0.06
P0AGJ2	TRMH_ECOLI	-0.98
P45570	YBCI_ECOLI	-1.53
P0AED9	DCM_ECOLI	1.12
P52094	HISQ_ECOLI	-0.37
P37757	YDDE_ECOLI	0.47
P0ABW5	SFMA_ECOLI	-0.49
Q47142	HCAT_ECOLI	0.7
P15639	PUR9_ECOLI	0.2
P0ACB7	HEMY_ECOLI	-0.81
P39409	YJJW_ECOLI	0.22
P0AC35	TTDB_ECOLI	-0.44
P0AFX7	RSEA_ECOLI	-1.04
P11988	BGLB_ECOLI	0.09
P78285	LYSD_ECOLI	-0.81
P37387	XYLF_ECOLI	-0.76
P21893	RECJ_ECOLI	-0.47
P40191	PDXK_ECOLI	0.21
P10378	ENTE_ECOLI	0.71
Q47140	HCAF_ECOLI	-1.1
P45463	TTDR_ECOLI	-1.68
P06722	MUTH_ECOLI	-0.78
P37327	YFDC_ECOLI	0.2
P23830	PSS_ECOLI	-0.57
P07604	TYRR_ECOLI	-0.37
P76469	RHMA_ECOLI	-0.47
P39835	GNTT_ECOLI	-0.4
P52124	YFJI_ECOLI	-0.13
P76491	5DNU_ECOLI	-0.33
P0AG80	UGPB_ECOLI	0.5
P06996	OMPC_ECOLI	3.1
P69503	APT_ECOLI	-0.59
P0A9Q9	DHAS_ECOLI	-0.44
P39382	YJIK_ECOLI	-0.61
P31470	YIEK_ECOLI	1.46
P39367	YJHP_ECOLI	-0.88
P10907	UGPC_ECOLI	0.28
P0ACD2	WCAF_ECOLI	-0.35
P39874	YBEM_ECOLI	-0.9
P0A8N7	EPMA_ECOLI	-0.09
P0ABD8	BCCP_ECOLI	-0.44
P37682	YIAU_ECOLI	-1.58
P46852	YHHW_ECOLI	-0.47
P17169	GLMS_ECOLI	0.05
P0A917	OMPX_ECOLI	2.14
P77368	YBCL_ECOLI	1.37
P69739	MBHS_ECOLI	4.38
P0A825	GLYA_ECOLI	1.31
Q47153	LFHA_ECOLI	-0.44
P42640	YHBX_ECOLI	0.13
P28915	YBFC_ECOLI	-1.25
P0A794	PDXJ_ECOLI	-1.42
P75782	RLMF_ECOLI	-0.48
P00960	SYGA_ECOLI	0.22
Q6BF16	DGOA_ECOLI	-1.26
P16703	CYSM_ECOLI	0.86
P14375	ZRAR_ECOLI	-0.75
Q47152	RAYT_ECOLI	0.64
P0A6K6	DEOB_ECOLI	0.12
P24216	FLID_ECOLI	-0.34
P76541	EUTL_ECOLI	-0.98
P00722	BGAL_ECOLI	2.24
P24241	PTIBC_ECOLI	-0.05
P0CF89	INSI3_ECOLI	-0.06
P77150	PDXY_ECOLI	0.18
P29745	PEPT_ECOLI	1.42
P0CB39	EPTC_ECOLI	-0.68
P0AB96	ARSC_ECOLI	-1.24
P76121	YDDH_ECOLI	-0.77
P33232	LLDD_ECOLI	0.75
P07813	SYL_ECOLI	0.32
Q93K97	ADPP_ECOLI	-1.03
P06609	BTUC_ECOLI	-1.47
P30749	MOAE_ECOLI	-1.67
P0A7C6	PEPE_ECOLI	-0.77
P52598	YGBI_ECOLI	-1.34
P0ABK9	NRFA_ECOLI	0.28
P76155	TFAQ_ECOLI	0.54
P76071	INSH5_ECOLI	-0.7
P27242	WAAU_ECOLI	0.07
P16432	HYCF_ECOLI	0.1
P75728	UBIF_ECOLI	-0.04
P37650	BCSC_ECOLI	3.29
P52644	HSLJ_ECOLI	-0.56
P37195	DCTR_ECOLI	-1.61
P0AGJ7	TRML_ECOLI	-0.48
P0A858	TPIS_ECOLI	-0.94
P32170	RHAA_ECOLI	0.46
P39334	BDCR_ECOLI	-0.16
P0CF25	INSB1_ECOLI	0.12
P37626	YHII_ECOLI	0.28
P24554	RADA_ECOLI	-0.3
P0AB93	ARSB_ECOLI	-0.42
P0AEV9	HYCI_ECOLI	-0.95
P00893	ILVI_ECOLI	0.94
P0AGH5	SAPC_ECOLI	0.54
P16691	PHNO_ECOLI	-1.46
P0A8G3	UXAC_ECOLI	-0.34
P77608	MHPD_ECOLI	0.3
P37683	YIAV_ECOLI	-0.39
P76083	PAAH_ECOLI	-0.37
P69824	PTMA_ECOLI	-1.15
P28905	HOLC_ECOLI	0.19
P08722	PTV3B_ECOLI	0.7
P0AAJ8	HYBA_ECOLI	0.58
P0A729	YCEF_ECOLI	-1.07
P0A6S3	FLGI_ECOLI	0.91
P13445	RPOS_ECOLI	-0.92
P27833	WECE_ECOLI	-0.7
P0AER0	GLPF_ECOLI	0.37
P39301	ULAA_ECOLI	-0.97
P21645	LPXD_ECOLI	0.33
P76223	YNJB_ECOLI	0.31
P0A7B8	HSLV_ECOLI	-1.2
P0AFD4	NUOH_ECOLI	-1.34
P0A8P6	XERC_ECOLI	-0.97
P33012	SBMC_ECOLI	-0.01
P0AG86	SECB_ECOLI	-1.09
P60390	RSMH_ECOLI	-0.13
P0AEC3	ARCB_ECOLI	0.01
P52697	6PGL_ECOLI	-0.26
P04391	OTC1_ECOLI	-1.13
P0DMC5	RCSC_ECOLI	0.54
P76226	YNJF_ECOLI	-0.37
P23721	SERC_ECOLI	-0.23
P67444	XANQ_ECOLI	0.07
P33346	YEHI_ECOLI	0.77
P0AGB3	RPOH_ECOLI	-0.83
P76299	FLHB_ECOLI	-0.6
P39344	IDNT_ECOLI	-0.2
P12758	UDP_ECOLI	0.08
P0AED0	USPA_ECOLI	-0.63
P16430	HYCD_ECOLI	-0.46
P0ACR9	MPRA_ECOLI	-1.46
P0AD70	AMPH_ECOLI	0.56
P27434	RODZ_ECOLI	0.76
P37050	YADN_ECOLI	0.24
P28305	PABC_ECOLI	-0.94
P0AA47	PLAP_ECOLI	0.12
P0ABK2	CYDB_ECOLI	-0.77
P75893	RUTF_ECOLI	-0.16
P33221	PURT_ECOLI	-0.49
P32157	YIIM_ECOLI	-1.33
P76502	SIXA_ECOLI	0.5
Q46909	YGCS_ECOLI	0.08
P0ACL0	GLPR_ECOLI	-0.75
P76007	NHAP2_ECOLI	-0.24
P0AGH1	YHHJ_ECOLI	1.04
P29013	YCGB_ECOLI	-0.27
P32099	LPLA_ECOLI	-0.39
P37690	ENVC_ECOLI	-0.25
P0AAE8	CADB_ECOLI	-0.35
P0A9G8	MODE_ECOLI	-1.86
P37675	YIAN_ECOLI	-0.27
P0A9K9	SLYD_ECOLI	3.51
P0AF08	APBC_ECOLI	0.09
P33363	BGLX_ECOLI	2.92
P0AAE5	ARCD_ECOLI	-0.06
P76129	DOSP_ECOLI	-0.2
P37908	YFJD_ECOLI	-0.48
P75809	YBJI_ECOLI	0.44
P17115	GUTQ_ECOLI	-0.49
P77775	YFCH_ECOLI	0.79
P37680	SGBE_ECOLI	-0.44
P37774	YECC_ECOLI	-0.41
P27126	RFAS_ECOLI	-0.32
P05020	PYRC_ECOLI	-0.84
P37028	BTUF_ECOLI	-0.51
P33341	YEHB_ECOLI	3.17
P76407	YEGS_ECOLI	-0.67
P0AFP4	YBBO_ECOLI	0.25
P52097	TILS_ECOLI	-0.62
P0AEQ3	GLNH_ECOLI	-0.41
P37047	CDAR_ECOLI	0.54
P60906	SYH_ECOLI	-0.02
P77360	YPHC_ECOLI	0.07
P0AEA5	CYOE_ECOLI	-1.1
P77783	YNFF_ECOLI	2.86
P13036	FECA_ECOLI	1.53
P31437	YICL_ECOLI	-0.8
P38684	TORR_ECOLI	-0.78
P52052	YGGR_ECOLI	-1.02
P37669	WECH_ECOLI	-0.07
P77672	LSRC_ECOLI	-1.06
Q47013	ELAD_ECOLI	-0.74
P37127	AEGA_ECOLI	0.24
P36649	CUEO_ECOLI	1.34
P00934	THRC_ECOLI	0.03
P31069	KCH_ECOLI	-0.08
P0A821	SELA_ECOLI	1.09
P00509	AAT_ECOLI	-0.06
P69797	PTNAB_ECOLI	-0.03
P51981	AEEP_ECOLI	0.39
Q46938	KDUI_ECOLI	0.75
P0ADM6	YIDX_ECOLI	-1.2
P63284	CLPB_ECOLI	-0.42
P76594	PKA_ECOLI	0.48
P77564	YDHW_ECOLI	-0.67
P0AFL6	PPX_ECOLI	0.3
P76535	MURQ_ECOLI	0.01
P08660	AK3_ECOLI	0.72
P0AAH0	PSTB_ECOLI	-0.9
P00550	PTM3C_ECOLI	0.39
P68739	NFI_ECOLI	-0.71
P76576	YFGM_ECOLI	-0.51
P0A8R9	HDFR_ECOLI	-1.03
P0AE24	ARAE_ECOLI	-0.61
P77219	YAHC_ECOLI	-0.35
P11868	TDCD_ECOLI	0.87
P0ADV5	YHBW_ECOLI	-0.27
P32721	ALSA_ECOLI	0.74
P31125	EAMA_ECOLI	-1.42
P45424	YHCH_ECOLI	-1.12
P31547	METI_ECOLI	-0.31
P0ACP1	CRA_ECOLI	-1.06
P36547	EUTR_ECOLI	-0.31
P20083	PARE_ECOLI	-0.65
P15006	MCRC_ECOLI	-0.49
P37637	MDTF_ECOLI	0.23
P37655	BCSQ_ECOLI	-1.55
P75804	YLII_ECOLI	0.72
P77359	DJLC_ECOLI	-0.96
P39315	QOR2_ECOLI	-1.28
P25740	RFAG_ECOLI	-0.21
P0AFC0	NUDB_ECOLI	-1.51
P77475	YQAB_ECOLI	-1.4
P0AEN1	FRE_ECOLI	-1.25
P0A6A3	ACKA_ECOLI	-0.14
P13009	METH_ECOLI	0.1
P63389	YHES_ECOLI	0.36
P75851	SSUC_ECOLI	-0.64
P76350	SHIA_ECOLI	-0.19
P76245	YEAP_ECOLI	0.14
P75892	RUTG_ECOLI	-0.15
P60844	AQPZ_ECOLI	-0.49
P0ACS7	RPIR_ECOLI	-0.29
P31459	DGOK_ECOLI	-0.64
P0A8M3	SYT_ECOLI	0.78
P52101	GLRK_ECOLI	-0.59
P32674	PFLD_ECOLI	0.69
P11989	BGLG_ECOLI	-1.12
P28304	QOR1_ECOLI	-0.22
P75822	YBJT_ECOLI	-0.76
P77199	YAIT_ECOLI	3.09
P0AFR2	DAUA_ECOLI	0.16
P39902	SPRT_ECOLI	-1.18
P69826	PTMCB_ECOLI	-0.14
P45579	YBDH_ECOLI	0.21
P23840	DIND_ECOLI	-1.65
P76027	OPPD_ECOLI	0.99
P13000	BIOD1_ECOLI	-0.63
P14377	ZRAS_ECOLI	-0.07
P77658	YNAA_ECOLI	0.83
P07913	TDH_ECOLI	1.65
P75747	ABRB_ECOLI	-0.72
P0AA73	YHBE_ECOLI	-1.08
P31545	EFEB_ECOLI	-0.22
P80645	SSUD_ECOLI	-0.46
P0AA63	YQJA_ECOLI	-1.13
Q57261	TRUD_ECOLI	0.03
P0A717	KPRS_ECOLI	0.2
P63020	NFUA_ECOLI	-1.08
P75794	PFLE_ECOLI	0.37
P66948	BEPA_ECOLI	-0.2
P16683	PHNE_ECOLI	-1.17
P22255	CYSQ_ECOLI	-1.24
P0AB98	ATP6_ECOLI	-0.13
P77301	YBAP_ECOLI	0.65
P76536	YFEX_ECOLI	-0.05
P30863	DKGB_ECOLI	-0.26
P76500	YFCQ_ECOLI	-0.31
P28697	HTGA_ECOLI	0.97
P37635	YHIS_ECOLI	0.74
P0ACK2	AGAR_ECOLI	-1.04
P24192	HYPD_ECOLI	0.22
P31434	XYLS_ECOLI	0.7
P0A9S3	GATD_ECOLI	0.58
P24200	MCRA_ECOLI	0.15
P76330	YEDQ_ECOLI	0.78
P77503	YCJS_ECOLI	0.23
P77156	YDCU_ECOLI	-0.4
P0A6V8	GLK_ECOLI	0.18
P00582	DPO1_ECOLI	0.48
P03835	INSG_ECOLI	0.36
P0A993	F16PA_ECOLI	0.32
P21865	KDPD_ECOLI	0.62
P75691	YAHK_ECOLI	0.54
P33650	FEOB_ECOLI	-0.04
P0A8A4	PSRP_ECOLI	-0.78
P0A8A2	YEEN_ECOLI	0.16
P76657	YQIJ_ECOLI	-1.18
P0ABQ0	COABC_ECOLI	-0.68
P77735	YAJO_ECOLI	0.99
Q46833	YGHE_ECOLI	0.25
P75748	YBGO_ECOLI	0.7
P39265	ALSB_ECOLI	-0.68
P18335	ARGD_ECOLI	0.49
P75820	AMID_ECOLI	0.16
P21156	CYSD_ECOLI	-1
P37678	SGBH_ECOLI	-0.64
P62601	TREF_ECOLI	-0.18
P69922	FUCI_ECOLI	1.19
P75989	BLUR_ECOLI	-0.66
P26281	HPPK_ECOLI	-0.58
P64604	MLAD_ECOLI	-0.36
P75806	YBJG_ECOLI	-1.26
P0AEL6	FEPB_ECOLI	-1.1
P23843	OPPA_ECOLI	0.48
P31474	HSRA_ECOLI	-0.46
P13458	SBCC_ECOLI	-0.67
P0A8R7	YCJF_ECOLI	-0.77
P03007	DPO3E_ECOLI	-0.92
P76398	MDTB_ECOLI	0.79
P0AG76	SBCD_ECOLI	-0.33
Q46856	YQHD_ECOLI	-0.78
P39451	ADHP_ECOLI	1.53
P52076	QSEB_ECOLI	0.18
P77737	OPPF_ECOLI	-0.76
P37313	DPPF_ECOLI	-0.64
P52125	YFJJ_ECOLI	-0.18
P0ADV7	MLAC_ECOLI	-0.28
P30871	3PASE_ECOLI	-0.82
P0A6J5	DADA_ECOLI	1.06
P02942	MCP1_ECOLI	0.5
P24077	ENTS_ECOLI	-0.67
Q47706	UIDC_ECOLI	1.9
P63201	GADW_ECOLI	0.39
P0AAI5	FABF_ECOLI	0.4
P32140	SQUS_ECOLI	-0.54
P06129	BTUB_ECOLI	2.51
P77268	DDPD_ECOLI	0.06
P0AF34	YIIR_ECOLI	-0.98
P37007	YAGA_ECOLI	-0.54
P27303	EMRA_ECOLI	-0.41
P76242	NIMT_ECOLI	-0.67
P23872	AES_ECOLI	1
P77307	FETB_ECOLI	-1.52
P0ABD5	ACCA_ECOLI	-0.52
P32681	YJAH_ECOLI	-0.63
P0A9N8	NRDG_ECOLI	1.68
P0A756	KEFG_ECOLI	-0.17
P31665	YADD_ECOLI	-0.88
P0A867	TALA_ECOLI	0.02
P0AFG3	ODO1_ECOLI	1.03
P0A7D4	PURA_ECOLI	1.09
P0A8E7	YAJQ_ECOLI	-0.31
P0AD03	YEBS_ECOLI	-1.02
P42588	PAT_ECOLI	0.55
P0AEB5	YNAI_ECOLI	0.39
Q46890	YGBL_ECOLI	-0.29
P77231	CITG_ECOLI	-0.52
P31057	PANB_ECOLI	-0.01
P0ACL9	PDHR_ECOLI	-0.89
P45848	YCIQ_ECOLI	0.2
P16528	ICLR_ECOLI	-1.42
P31991	YDCD_ECOLI	-1.15
P23909	MUTS_ECOLI	0.18
P60422	RL2_ECOLI	1.05
Q59385	COPA_ECOLI	-0.22
P75960	NPD_ECOLI	0.09
P0AAI1	SSUB_ECOLI	-0.42
P45577	PROQ_ECOLI	1
P27859	TATD_ECOLI	-0.79
P0C066	MLTC_ECOLI	0.59
P0ABP8	DEOD_ECOLI	-0.78
P27296	DING_ECOLI	-0.35
P0AEK2	FABG_ECOLI	-1.33
P0AEQ6	GLNP_ECOLI	-1.13
P36662	TORD_ECOLI	-2.17
P0A7R1	RL9_ECOLI	0.06
P52108	RSTA_ECOLI	-0.98
P0ACP7	PURR_ECOLI	0.4
P77218	EUTD_ECOLI	-0.56
P64548	YFIR_ECOLI	0.21
P52061	RDGB_ECOLI	0.17
P31224	ACRB_ECOLI	1.2
P77297	YAHE_ECOLI	-1.66
P60546	KGUA_ECOLI	-0.59
P08312	SYFA_ECOLI	1.1
P75937	FLGE_ECOLI	1.23
P52106	CSGD_ECOLI	-0.55
P40874	MTOX_ECOLI	0.36
P39410	YJJJ_ECOLI	0.53
P39304	ULAD_ECOLI	-2.44
P75829	YBJX_ECOLI	-1.18
P19925	ENTD_ECOLI	-1.27
P11447	ARLY_ECOLI	-0.61
P31436	SETC_ECOLI	-1.03
P76237	YEAJ_ECOLI	-0.28
P0AB01	ELYC_ECOLI	-0.01
P41443	GSPH_ECOLI	-1.32
P45564	YFEN_ECOLI	2.95
P69441	KAD_ECOLI	-0.8
P0AFK2	PNUC_ECOLI	-2.1
P33927	CCMF_ECOLI	0.13
P31060	MODF_ECOLI	0.65
P08244	PYRF_ECOLI	-1.36
P0AE76	COBU_ECOLI	-1.36
P37597	YDHC_ECOLI	-0.9
P0CF81	INSF3_ECOLI	-0.54
P76318	YEDK_ECOLI	-0.95
P39298	YJFP_ECOLI	-0.56
P39406	RSMC_ECOLI	-0.03
P0AF03	MOG_ECOLI	0.13
P0AEV4	HYCA_ECOLI	-2.14
P0AEF8	DPPB_ECOLI	-0.48
P64483	YEAK_ECOLI	-0.54
P36928	YEGD_ECOLI	-0.09
P76038	PUUD_ECOLI	0.12
P52135	YFJT_ECOLI	0.44
P15288	PEPD_ECOLI	-0.3
P0AEP3	GALU_ECOLI	-0.45
P37649	YHJK_ECOLI	-0.16
P25516	ACNA_ECOLI	1.85
P33590	NIKA_ECOLI	0.24
P07118	SYV_ECOLI	0.56
P0AF67	TSAE_ECOLI	-0.56
P31134	POTG_ECOLI	-0.3
P77182	MNMC_ECOLI	0.31
P0AB67	PNTB_ECOLI	-0.53
P0A7Y0	RNC_ECOLI	-0.72
P33011	YEEA_ECOLI	-0.62
P75799	GSID_ECOLI	-0.43
P77743	PRPR_ECOLI	-0.31
P06610	BTUE_ECOLI	-0.05
P76016	DHAR_ECOLI	-0.37
P0AE16	AMPG_ECOLI	-0.72
P39347	INTB_ECOLI	-0.16
P77567	NHOA_ECOLI	-1.06
P09151	LEU1_ECOLI	0.75
P0ACH8	MELR_ECOLI	-0.75
P33353	YEHQ_ECOLI	0.12
P75855	ELFA_ECOLI	-0.55
Q6BEX0	YTFR_ECOLI	0.44
P33634	YFIE_ECOLI	-0.66
P0AAL6	YDHY_ECOLI	2.53
P33018	SFGH2_ECOLI	0.23
P37766	YDIF_ECOLI	1.28
P45756	GSPA_ECOLI	-0.26
P16525	TUS_ECOLI	0.21
P77409	PHSC_ECOLI	-0.98
P76114	MCBR_ECOLI	-0.15
P32166	MENA_ECOLI	-0.8
P77285	RSXG_ECOLI	-0.35
P46122	YAJI_ECOLI	-0.53
P75838	YCAO_ECOLI	0.86
P67601	YOBD_ECOLI	-1.1
P76044	YCJR_ECOLI	0.57
P76198	YDIN_ECOLI	-1.2
P77154	YCJT_ECOLI	-0.42
P21437	GLPX2_ECOLI	0.26
P0CF55	INSD3_ECOLI	0.16
P0C0S1	MSCS_ECOLI	-0.48
P33593	NIKD_ECOLI	0.01
P77335	HLYE_ECOLI	-0.96
P69853	DMSD_ECOLI	-1.69
P30852	SMF_ECOLI	-0.66
P30130	FIMD_ECOLI	3.15
P75905	PGAC_ECOLI	-0.02
P0AFU0	YEJB_ECOLI	0.88
P23910	ARAJ_ECOLI	0.26
P00547	KHSE_ECOLI	-0.61
P14294	TOP3_ECOLI	-0.37
P30847	BAES_ECOLI	0.31
P0AEC8	DCUS_ECOLI	-0.21
P32714	MDTP_ECOLI	0.02
P77589	MHPT_ECOLI	-0.78
P69820	ULAC_ECOLI	-1.96
P76562	TMCA_ECOLI	-0.6
P05704	MCP3_ECOLI	-0.88
P0ABV6	TOLR_ECOLI	-0.84
P0AC88	GM4D_ECOLI	0.86
P0CE47	EFTU1_ECOLI	1.35
P75810	YBJJ_ECOLI	0.01
P0ABZ1	FLIG_ECOLI	-1.29
P76034	YCIT_ECOLI	0.36
P32717	YJCS_ECOLI	0.96
P75898	RUTA_ECOLI	0.39
P76241	NIMR_ECOLI	-0.45
P75915	YCDY_ECOLI	-1.63
P39369	YJHR_ECOLI	-0.51
P52037	YGFF_ECOLI	-0.65
P31446	YIDI_ECOLI	-0.07
P0AFH8	OSMY_ECOLI	-1.06
P0A894	RAPZ_ECOLI	-0.94
P39377	IADA_ECOLI	0.14
P76514	YFDR_ECOLI	0.9
P0A6J8	DDLA_ECOLI	-0.3
P77716	YCJP_ECOLI	-0.67
P76485	YFBO_ECOLI	-0.27
P09030	EX3_ECOLI	-0.01
P0A7G6	RECA_ECOLI	-0.44
P76049	YCJY_ECOLI	0.36
P75796	GSIA_ECOLI	-0.53
P08957	T1MK_ECOLI	0.72
P77365	YAFY_ECOLI	-0.25
P31120	GLMM_ECOLI	0.15
P77163	TFAR_ECOLI	0.53
P33934	NAPH_ECOLI	1.36
Q46888	YGBJ_ECOLI	-0.31
P0AF78	YJFJ_ECOLI	-1.07
P09158	SPEE_ECOLI	-0.12
P24180	ACRE_ECOLI	-0.04
P0AB77	KBL_ECOLI	0.32
P77759	YLBH_ECOLI	0.67
P0AAJ1	YNFG_ECOLI	0.79
P30176	RIBX_ECOLI	0.83
P77395	YBBN_ECOLI	-0.72
P38105	RSPB_ECOLI	1.27
P28916	YBFD_ECOLI	-0.53
P00861	DCDA_ECOLI	0.72
P77263	ECPE_ECOLI	0.66
P36646	HOFC_ECOLI	-0.69
Q47158	YAFP_ECOLI	-0.66
P76349	YEEL_ECOLI	-0.69
P06721	METC_ECOLI	-1.18
P10905	UGPA_ECOLI	-1.02
P68183	MALG_ECOLI	-1.18
P0A8J2	DNAT_ECOLI	-1.31
Q46819	YGFS_ECOLI	-0.13
P37674	YIAM_ECOLI	-1.2
P39374	YJIC_ECOLI	-0.51
P77171	YDCI_ECOLI	-0.73
P24171	DCP_ECOLI	0.88
P27828	WECB_ECOLI	0.4
P13656	CHIA_ECOLI	2.87
P31663	PANC_ECOLI	-1.23
P75676	YAFX_ECOLI	0.53
Q46851	GPR_ECOLI	0.08
P0AB85	APBE_ECOLI	0.37
P64550	ALAE_ECOLI	-1.33
P28635	METQ_ECOLI	-0.66
P28248	DCD_ECOLI	0.25
P77293	GTRB_ECOLI	-0.76
P77377	WZXC_ECOLI	-0.41
P0A8C4	YGFB_ECOLI	-0.57
P00490	PHSM_ECOLI	0.75
P0AEX7	LIVH_ECOLI	-0.36
P39362	SGCE_ECOLI	-1.33
P0A6H5	HSLU_ECOLI	-0.72
P77529	YDJN_ECOLI	-0.08
P04968	ILVA_ECOLI	0.21
P45581	STFP_ECOLI	1.63
P32715	MDTO_ECOLI	-0.8
P0ABD1	YEAV_ECOLI	0.72
P31448	YIDK_ECOLI	0.51
P77690	ARNB_ECOLI	0.55
P0ACZ4	EVGA_ECOLI	-0.22
P76014	DHAL_ECOLI	-0.46
P69451	LCFA_ECOLI	-0.37
P0ADT8	YGIM_ECOLI	0.14
P36929	RSMB_ECOLI	0.19
P60778	TSGA_ECOLI	-0.85
P0ABM9	CCMH_ECOLI	0.22
P57998	INSB4_ECOLI	0.41
P75981	JAYE_ECOLI	-0.21
P31801	CHAA_ECOLI	-0.92
P27550	ACSA_ECOLI	1.72
P0A6P7	ENGB_ECOLI	1.12
P0AAB2	WZB_ECOLI	-1.51
P23522	GARL_ECOLI	-0.78
P37906	PUUB_ECOLI	1.36
P77269	YPHF_ECOLI	-0.76
P39187	YTFJ_ECOLI	-1.09
P77257	LSRA_ECOLI	-0.12
P76221	YDJZ_ECOLI	-0.68
P0ABD3	BFR_ECOLI	-1.01
P77579	PTFC1_ECOLI	-0.02
P0AA67	RHTA_ECOLI	-0.98
P0A6S7	GPDA_ECOLI	-0.07
P16384	MIAA_ECOLI	-0.83
P31122	SOTB_ECOLI	-0.15
P37660	YHJV_ECOLI	-0.97
P15043	RECQ_ECOLI	0.8
P76072	STFR_ECOLI	2.1
P0AGB0	SERB_ECOLI	0.29
P07017	MCP2_ECOLI	0.02
P39414	TTDT_ECOLI	0.52
P0AA41	TRUC_ECOLI	0.12
P13016	AMPD_ECOLI	-0.54
P77265	MDLA_ECOLI	-0.32
Q46911	YGCU_ECOLI	-0.15
P76518	ACOCT_ECOLI	1.58
P0A8H6	YIHI_ECOLI	0.8
P0ACE0	MBHM_ECOLI	1.14
P76425	RCNA_ECOLI	1.11
P22524	MUKE_ECOLI	-0.48
P0AFA9	NIKC_ECOLI	-0.32
P16688	PHNJ_ECOLI	1.07
P30864	YAFC_ECOLI	-0.23
P77806	YBDL_ECOLI	-0.67
P0AFD1	NUOE_ECOLI	-0.42
P64636	YRFG_ECOLI	-0.78
P0A6M2	DSBB_ECOLI	-1.66
P10121	FTSY_ECOLI	0.33
P65807	YGEY_ECOLI	0.25
P0AE08	AHPC_ECOLI	-1.34
P0A9P0	DLDH_ECOLI	0.15
P75908	YCDT_ECOLI	-1.45
P31460	DGOR_ECOLI	-2.08
P50457	PUUE_ECOLI	0.6
P75867	LONH_ECOLI	-0.45
P76041	SUCP_ECOLI	0.55
P0A6C1	END4_ECOLI	0.42
P77757	ARNC_ECOLI	-1.1
P33030	YEIR_ECOLI	0.28
P0AAD4	TYRP_ECOLI	-0.92
P18196	MINC_ECOLI	-0.32
P0AFY8	SEQA_ECOLI	0.89
P75736	YBFF_ECOLI	0.31
P45799	NUDE_ECOLI	-1.03
P0A6F3	GLPK_ECOLI	0.34
P15770	AROE_ECOLI	0.77
P26365	AMIB_ECOLI	0.89
P0A9W0	ULAR_ECOLI	-1.05
P76539	YPEA_ECOLI	0.5
P75672	YAFS_ECOLI	-0.83
P0A998	FTNA_ECOLI	-2.13
P31447	YIDJ_ECOLI	1.56
P0AAL3	NAPG_ECOLI	0.07
P45761	GSPJ_ECOLI	-1.12
P18843	NADE_ECOLI	0.06
P38038	CYSJ_ECOLI	0.98
P24240	ASCB_ECOLI	0.4
P37017	YADL_ECOLI	0.02
P0A9M8	PTA_ECOLI	0.22
P0A6B7	ISCS_ECOLI	1.39
P0A698	UVRA_ECOLI	1.73
P39358	YJHG_ECOLI	0.75
P0A8N0	MATP_ECOLI	-2.31
P0AB74	KBAY_ECOLI	-1.13
P77432	LSRK_ECOLI	0.83
P07024	USHA_ECOLI	0.15
P77239	CUSB_ECOLI	0.45
P75864	RLMKL_ECOLI	0.15
P32689	YJBH_ECOLI	2.15
P33915	YEJE_ECOLI	-0.3
P31126	YDEE_ECOLI	-1.64
P39452	RIR3_ECOLI	-0.02
P75797	GSIB_ECOLI	-0.08
P67080	YGGS_ECOLI	-0.52
P54746	MNGB_ECOLI	1.46
P37661	EPTB_ECOLI	-0.34
P38101	EAMB_ECOLI	-1.21
P08189	FIMF_ECOLI	0.15
Q46948	YAJL_ECOLI	-1.3
P22634	MURI_ECOLI	-0.71
P60595	HIS5_ECOLI	1.52
P76547	YFFP_ECOLI	0.16
P60752	MSBA_ECOLI	-0.34
P0C093	SLMA_ECOLI	-1.38
P52126	YFJK_ECOLI	0.28
P0AEM9	FLIY_ECOLI	-0.34
P0AGG0	THIL_ECOLI	-0.23
P76419	YEGV_ECOLI	0.06
P77704	YDJI_ECOLI	-0.79
Q46897	CAS6_ECOLI	0.48
P35340	AHPF_ECOLI	0.75
P0C960	EMTA_ECOLI	-0.39
P22525	YCBB_ECOLI	0.81
P0A9C3	GALM_ECOLI	0.31
P42906	AGAA_ECOLI	-0.49
P77546	YDAV_ECOLI	-0.53
P07023	TYRA_ECOLI	-0.99
P0A6H8	CLSA_ECOLI	-0.22
P0ACU5	FABR_ECOLI	-1.38
P0ADA5	YAJG_ECOLI	-0.36
P0AEE5	DGAL_ECOLI	0.15
P77228	YDFJ_ECOLI	-0.18
P33940	MQO_ECOLI	0.64
P23890	CADC_ECOLI	0
P0A763	NDK_ECOLI	-1.4
P08192	FOLC_ECOLI	-0.85
P0ABI8	CYOB_ECOLI	-0.29
P02931	OMPF_ECOLI	3.14
P0AES0	GSP_ECOLI	0.28
P46187	RSEC_ECOLI	-0.63
Q46811	YGFK_ECOLI	0.19
P0AFR4	YCIO_ECOLI	0.52
P0ABL5	NAPC_ECOLI	1.05
P08178	PUR5_ECOLI	0.26
P76346	MTFA_ECOLI	-0.67
P22259	PCKA_ECOLI	0.38
P76254	YEAX_ECOLI	-0.93
P77221	YAHG_ECOLI	0.52
P0A9P9	IDNO_ECOLI	-0.97
P64594	YHAV_ECOLI	0.7
P20099	BISC_ECOLI	0.78
P67095	YFCE_ECOLI	-0.56
P0AEP7	GCL_ECOLI	1.51
P0A9T0	SERA_ECOLI	-0.12
P67143	YHGN_ECOLI	-0.8
P0AER3	GLTJ_ECOLI	-1.37
P76329	MPGP_ECOLI	-0.67
P0A707	IF3_ECOLI	-1.29
P41441	GSPF_ECOLI	-0.59
P39285	MSCM_ECOLI	-0.27
P0A6D7	AROK_ECOLI	-0.89
P32135	YIHN_ECOLI	-0.43
P60955	LGT_ECOLI	0.02
P75767	GNGF_ECOLI	2.08
P0ABP6	DEDA_ECOLI	-0.19
Q46908	YGCR_ECOLI	-1.75
P21517	MALZ_ECOLI	1.92
P25743	YCHE_ECOLI	0.53
P77162	YKFB_ECOLI	0.13
P16433	HYCG_ECOLI	0.31
P0ABN9	DCUB_ECOLI	-0.09
P16679	PHNL_ECOLI	-1.23
P31553	CAIT_ECOLI	0.25
P0AA53	QMCA_ECOLI	-0.14
P39263	YFCC_ECOLI	0.12
P04846	NLPA_ECOLI	-0.22
P76236	YEAI_ECOLI	-0.62
P0A853	TNAA_ECOLI	0.53
P77400	YBAT_ECOLI	0.03
P0A940	BAMA_ECOLI	3.12
P32677	YIJO_ECOLI	-0.47
P76104	YDCP_ECOLI	0.34
P76513	YFDQ_ECOLI	-0.5
Q46857	DKGA_ECOLI	-1.48
P37630	YHIM_ECOLI	-0.88
P77657	YAGK_ECOLI	0.25
P17583	CYNX_ECOLI	-0.05
P0AE28	AROM_ECOLI	-0.93
P76272	YEBT_ECOLI	0.47
P0ACP5	GNTR_ECOLI	-0.81
P77247	YNIC_ECOLI	-0.48
P30870	GLNE_ECOLI	-0.02
P75788	YBIR_ECOLI	-0.86
P30178	YBIC_ECOLI	0.55
P0A7Z0	RPIA_ECOLI	-0.02
P32718	ALSK_ECOLI	-0.39
P23842	YFEA_ECOLI	-0.03
P37349	DHAM_ECOLI	-0.85
P0AFH0	OGT_ECOLI	0.5
P0A7D7	PUR7_ECOLI	-0.43
P45420	YHCD_ECOLI	1.07
P11350	NARI_ECOLI	-0.61
P64588	YQJI_ECOLI	3.92
P77808	CINAL_ECOLI	0.62
P0ADX9	RSMD_ECOLI	0.7
P03024	GALR_ECOLI	0.14
P37794	CHBG_ECOLI	0.19
P45762	GSPK_ECOLI	0.13
P75843	YCAQ_ECOLI	-1.01
P33234	ADIY_ECOLI	-0.13
P77599	YFCS_ECOLI	0.2
Q46877	NORV_ECOLI	1.1
P0AFL1	POTI_ECOLI	-0.36
Q47537	TAUA_ECOLI	-0.73
P0AAS5	YLBF_ECOLI	0.57
P16429	HYCC_ECOLI	-0.37
P39366	SGCX_ECOLI	-0.31
P31133	POTF_ECOLI	-0.13
P33135	FLIR_ECOLI	-0.91
P55799	PRP2_ECOLI	-0.92
P0AEJ2	ENTC_ECOLI	2.84
P0ACU2	RUTR_ECOLI	0.79
P77170	PINQ_ECOLI	-1.09
P0ADR8	YGDH_ECOLI	-0.16
P64557	YGFM_ECOLI	-1.19
P37657	BCSE_ECOLI	0.19
P77739	YNIA_ECOLI	-0.16
P03004	DNAA_ECOLI	0.52
P46133	ABGT_ECOLI	-0.06
P28912	YHHI_ECOLI	-0.93
P75726	CILA_ECOLI	0.45
P0ADH5	FIMB_ECOLI	1.23
P43676	PITB_ECOLI	-0.45
P0A6L7	UXAB_ECOLI	0.12
P0A6E9	BIOD2_ECOLI	-1.44
P0A850	TIG_ECOLI	0.25
P36562	COBT_ECOLI	-0.57
P12998	BIOF_ECOLI	0.36
P04425	GSHB_ECOLI	-0.37
P31680	DJLA_ECOLI	0.01
P30011	NADC_ECOLI	-0.68
P0A7W1	RS5_ECOLI	-0.66
P77277	EUTJ_ECOLI	-0.79
P0AFS3	FOLM_ECOLI	0.06
P42909	PTPB1_ECOLI	-1
P11349	NARH_ECOLI	1.28
P76551	EUTA_ECOLI	0.39
P36979	RLMN_ECOLI	1.04
Q47689	MMUP_ECOLI	-0.13
P0ABC3	HFLC_ECOLI	0.65
P05791	ILVD_ECOLI	0.77
P76458	ATOD_ECOLI	0.11
P00957	SYA_ECOLI	2.63
P63883	AMIC_ECOLI	0.31
P28631	HOLB_ECOLI	-0.77
P0A8X0	YJGA_ECOLI	-0.64
P0A761	NANE_ECOLI	-0.9
P76616	YGAQ_ECOLI	0.56
P0AAN3	HYPB_ECOLI	2.35
P0A9Q1	ARCA_ECOLI	-0.44
P76482	YFBL_ECOLI	0.94
P76228	YNJI_ECOLI	-0.81
P43341	LPXH_ECOLI	-0.27
P0AGG8	TLDD_ECOLI	0.34
P76630	YGAZ_ECOLI	0.32
P50456	MLC_ECOLI	-0.35
P71297	YAGN_ECOLI	-1.01
P0C058	IBPB_ECOLI	-1.81
P36938	PGM_ECOLI	0.5
P39361	SGCR_ECOLI	-0.82
P0AD57	ISPB_ECOLI	-0.79
P09831	GLTB_ECOLI	0.97
P0AF06	MOTB_ECOLI	1.34
P0A9M0	LON_ECOLI	0.42
P77726	YAJR_ECOLI	0.23
P77627	YBER_ECOLI	0.17
P31064	YEDE_ECOLI	0.11
P76446	RTN_ECOLI	-0.07
P76250	DMLR_ECOLI	-1.07
P0A6C5	ARGA_ECOLI	-0.31
P77174	YBDM_ECOLI	-1.16
P78067	YNJE_ECOLI	2.84
P0ABG1	CDSA_ECOLI	-0.52
P37348	YECE_ECOLI	-1.29
P0AB12	YCCF_ECOLI	-1.74
P77804	YDGA_ECOLI	0
P77795	YDCT_ECOLI	1.13
P24169	DCOS_ECOLI	0.46
P0AAB8	USPD_ECOLI	-2.74
P33554	PPDA_ECOLI	-0.78
P75737	YBFP_ECOLI	0.79
P37909	YBGD_ECOLI	-0.4
P0A8I5	TRMB_ECOLI	-0.44
P0CE51	INSH3_ECOLI	-1.36
P02929	TONB_ECOLI	1.27
P0AEB2	DACA_ECOLI	-0.02
P21177	FADB_ECOLI	1.03
P75678	YKFA_ECOLI	-0.12
P76004	YCGM_ECOLI	0.45
P0AFK0	PMBA_ECOLI	0.95
P14176	PROW_ECOLI	0.5
P0ADI4	ENTB_ECOLI	-1
P42597	YGJP_ECOLI	-1.14
P08204	ARAB_ECOLI	-0.04
P75863	YCBX_ECOLI	-0.24
P41409	RIHA_ECOLI	0.08
P45464	LPOA_ECOLI	2.17
P39370	NANS_ECOLI	0.92
P0A6D0	ARGR_ECOLI	-0.6
P46883	AMO_ECOLI	1.85
P77718	THII_ECOLI	0.93
P75936	FLGD_ECOLI	-0.07
P52086	COBC_ECOLI	-1.2
P07012	RF2_ECOLI	2.07
P77746	YBDO_ECOLI	-1.46
P41407	AZOR_ECOLI	-0.8
P23847	DPPA_ECOLI	0.39
P0ADG4	SUHB_ECOLI	-0.24
P0CE56	INSH9_ECOLI	-1.36
P0AAB4	UBID_ECOLI	0.69
P0ABX5	FLGG_ECOLI	0.53
P04128	FIMA1_ECOLI	0.58
P0ADD5	YJJP_ECOLI	-1.59
P0AEU7	SKP_ECOLI	-1.42
P33228	RECT_ECOLI	-0.68
P0AFY6	SBMA_ECOLI	-1.14
P76145	TAM_ECOLI	-0.71
P23484	FECI_ECOLI	-0.79
P23883	PUUC_ECOLI	0.18
P33026	SETB_ECOLI	-0.6
P23871	HEMH_ECOLI	-0.28
P31825	TRMN6_ECOLI	-0.46
P06616	ERA_ECOLI	-0.82
P39398	LGOT_ECOLI	-0.03
P43674	YCAL_ECOLI	0.11
P0CF54	INSD2_ECOLI	0.16
P0AAD6	SDAC_ECOLI	-0.35
A5A605	YKFM_ECOLI	-0.56
P11667	ARGO_ECOLI	-1.46
P25550	ASLB_ECOLI	0.02
P09126	HEM4_ECOLI	-1.42
P26646	ACUI_ECOLI	0.38
P09546	PUTA_ECOLI	0.59
P23874	HIPA_ECOLI	0.31
P75828	YBJD_ECOLI	0.02
P26458	APPB_ECOLI	-0.32
P29217	YCEH_ECOLI	-0.7
P0A759	NAGB_ECOLI	-0.17
P0AC00	FRLB_ECOLI	-0.45
P31677	OTSA_ECOLI	-0.77
P45563	XAPA_ECOLI	-0.51
P31550	THIB_ECOLI	0.57
P0ABU9	TOLQ_ECOLI	-0.04
P0ADK0	YIAF_ECOLI	-0.26
P0AAG0	DPPD_ECOLI	-0.06
P0ABU7	EXBB_ECOLI	-0.28
P39343	IDNR_ECOLI	-0.94
P0AFS1	LSRD_ECOLI	-0.76
P0C8J8	GATZ_ECOLI	-0.53
P09424	MTLD_ECOLI	-0.44
P0AGA6	UHPA_ECOLI	-1.37
P0A8V0	RBN_ECOLI	0.25
P64554	QUEE_ECOLI	-0.59
P41052	MLTB_ECOLI	0.92
P39363	SGCA_ECOLI	-0.64
P0AA84	CLSB_ECOLI	-0.42
P0AEH1	RSEP_ECOLI	-0.41
P39831	YDFG_ECOLI	0.31
P0AFA7	NHAB_ECOLI	0.52
P0AF10	MTLR_ECOLI	-0.89
P05050	ALKB_ECOLI	1.28
P08395	SPPA_ECOLI	0.98
P0ACY1	YDJA_ECOLI	0.23
[truncated: 1,465 more rows]

## Sheet: YEAST
UID	Uniprot Name	PScore
P46959	TRM61_YEAST	1.19
P40356	MED3_YEAST	4.16
P0CX10	ERR1_YEAST	-0.33
Q06651	PIB1_YEAST	-0.23
Q03690	CLU_YEAST	0.59
P31755	OCH1_YEAST	0.75
P28273	OPLA_YEAST	3.67
P06101	CDC37_YEAST	-0.24
P40970	LCB2_YEAST	0.91
P53331	REXO1_YEAST	0.39
P39713	BDH2_YEAST	0.68
P25591	VAC17_YEAST	1.81
P39929	SNF7_YEAST	-1.57
P32178	CHMU_YEAST	-0.92
P43541	YFG3_YEAST	-0.56
P0CL31	YPL83_YEAST	6.1
P40327	PRS4_YEAST	0.78
P32608	RTG2_YEAST	0.21
P53819	YRF16_YEAST	2.18
P38912	IF1A_YEAST	-0.49
Q07980	MLH2_YEAST	0.41
P29295	HRR25_YEAST	1.21
P47163	EFM3_YEAST	-0.73
Q06551	ERFB_YEAST	0.24
P38221	CDS1_YEAST	0.11
P43618	CNN1_YEAST	0.04
P38249	EIF3A_YEAST	0.92
Q12229	UBX3_YEAST	1.11
Q08172	YO024_YEAST	-0.8
P43587	YPI1_YEAST	-0.64
P21374	ISY1_YEAST	-0.91
Q04689	AIM32_YEAST	-0.35
Q06417	TDA5_YEAST	-0.39
P53731	ARPC2_YEAST	-0.05
P42900	SLS1_YEAST	0.48
P46971	PMT4_YEAST	0.19
P16664	RGP1_YEAST	0.03
Q03337	TRS31_YEAST	-0.57
P53134	YGL4_YEAST	0.31
P34246	MTC2_YEAST	0.52
P37292	GLYM_YEAST	0.2
P32623	CRH2_YEAST	1.33
Q12515	PAR32_YEAST	0.55
P32584	STE14_YEAST	-1.61
P36053	ELF1_YEAST	1.41
P38080	AKL1_YEAST	2.9
P42934	PMT6_YEAST	0.71
P05748	RL15A_YEAST	-0.42
Q12525	MHT1_YEAST	0.05
P17214	EST1_YEAST	0.3
P47052	SDHX_YEAST	0.44
Q12204	YOR22_YEAST	0.41
P22517	KCC2_YEAST	1.33
P53892	IBD2_YEAST	1.16
P34248	YKK0_YEAST	-1.11
P40556	YIA6_YEAST	-0.02
P40090	SCC4_YEAST	-0.37
P25573	MGR1_YEAST	0.58
Q06143	DIC1_YEAST	-0.11
Q02784	GLRX5_YEAST	-0.41
P25376	AGP1_YEAST	1.25
P40207	YM17_YEAST	-1.35
P34253	KTI12_YEAST	-0.87
P40460	NDC80_YEAST	0.51
P17260	KRE1_YEAST	0.99
P34756	FAB1_YEAST	2.18
P46367	ALDH4_YEAST	0.42
P43615	IRC6_YEAST	-1.8
Q04921	SPR28_YEAST	0.69
Q06991	PUN1_YEAST	-0.87
Q04660	ERB1_YEAST	0.81
Q03656	SKY1_YEAST	1.52
P39875	EXO1_YEAST	2.48
Q01684	SPR6_YEAST	0.53
P40010	NUG1_YEAST	0.12
P38830	NDT80_YEAST	0.36
Q06089	YP098_YEAST	-0.17
P43555	EMP47_YEAST	1.25
P46679	STB2_YEAST	2.14
Q07688	YPD1_YEAST	-1.01
P38283	SLI15_YEAST	1.26
P53242	YG29_YEAST	-0.21
Q12502	LDB19_YEAST	1.77
P04397	GAL10_YEAST	0.08
P32494	NGG1_YEAST	1.43
P25578	PGPS1_YEAST	0.1
P32476	ERG1_YEAST	0.32
P18411	FUN14_YEAST	-0.11
P40541	SCC3_YEAST	-0.14
P40302	PSA6_YEAST	-0.06
P33753	TRM2_YEAST	0.18
P32480	HIR2_YEAST	1.71
P53296	ATF2_YEAST	1.35
P53915	NRK1_YEAST	-0.69
P00890	CISY1_YEAST	-0.32
P20448	DBP4_YEAST	2.1
Q06339	TFC6_YEAST	0.69
Q04638	ITT1_YEAST	0.43
Q01766	HAL1_YEAST	0.61
P47143	ADK_YEAST	0.43
P80210	PURA_YEAST	0.74
P38696	ARP1_YEAST	0.78
P25694	CDC48_YEAST	0.81
Q03558	OYE2_YEAST	0.65
P38894	FLO5_YEAST	3.08
P36049	EBP2_YEAST	3.22
Q06623	HDA3_YEAST	0.57
Q06680	CND3_YEAST	0.08
P53079	COG1_YEAST	-1.05
P33324	YKJ1_YEAST	-0.57
O13535	YH11B_YEAST	3.69
P53317	NOP19_YEAST	-1
P53944	MTQ1_YEAST	-1.12
Q12285	MDY2_YEAST	-0.36
P47168	TTI2_YEAST	-0.83
Q12524	PCD1_YEAST	-0.06
P38960	STN1_YEAST	-0.04
Q06504	NAT3_YEAST	-0.57
Q99177	BRR1_YEAST	-1.39
Q06005	LIPB_YEAST	0.42
P53121	FLC3_YEAST	3.46
P40064	NU157_YEAST	0.66
P33332	SEC3_YEAST	2.11
Q03619	YE12B_YEAST	3.86
P36036	YRA2_YEAST	0.68
P39542	YJT3_YEAST	0.15
O13565	YL358_YEAST	0.41
P53163	MNP1_YEAST	-0.25
Q12291	BMT6_YEAST	1.62
P40578	MGA2_YEAST	2.37
Q05777	YL194_YEAST	0.78
Q07418	PEX19_YEAST	-0.97
P04449	RL24A_YEAST	2.85
P25808	SPB4_YEAST	1.13
Q03103	ERO1_YEAST	0.11
P38257	MMS4_YEAST	0.38
P53959	COG6_YEAST	0.55
P35189	TAF14_YEAST	-0.04
P40364	MPM1_YEAST	1.23
P40344	ATG3_YEAST	0.19
P54838	DAK1_YEAST	0.04
Q12069	PUS9_YEAST	0.27
P21705	DAL82_YEAST	0.92
Q07872	ENT4_YEAST	-0.47
P38261	EXO84_YEAST	1.86
P01123	YPT1_YEAST	-0.29
P38627	URA8_YEAST	-0.1
Q03983	YD179_YEAST	0.27
P53740	YN8S_YEAST	1.05
Q04406	EMI1_YEAST	1.35
Q06252	YL179_YEAST	1.68
P23642	VAN1_YEAST	-0.42
P32769	HBS1_YEAST	0.29
P43600	YFJ0_YEAST	0.92
Q03705	CG121_YEAST	-0.86
P42838	LEM3_YEAST	0.93
O13572	YPR50_YEAST	0.31
P53938	EOS1_YEAST	0.86
P47133	EMC2_YEAST	-0.25
P0CZ17	ASP21_YEAST	0.79
P50277	BIOA_YEAST	0.92
Q06389	NCS1_YEAST	-1.67
P30619	SEC1_YEAST	0.29
P47050	CUL8_YEAST	0.22
Q06524	SUE1_YEAST	1.76
P32491	MKK2_YEAST	1.28
Q12141	YG11B_YEAST	3.8
Q12334	SCM3_YEAST	0.04
Q05942	RSA3_YEAST	-0.99
P32770	NRP1_YEAST	4.58
P54780	RL15B_YEAST	-0.28
P38302	NTC20_YEAST	-0.49
P31382	PMT2_YEAST	0.45
P34078	LTV1_YEAST	3.3
Q04712	RRN11_YEAST	0.83
P40212	RL13B_YEAST	-0.68
P14180	CHS2_YEAST	1.55
Q12064	BUD30_YEAST	0.72
Q06537	YP153_YEAST	-0.71
Q99316	MPD2_YEAST	-0.63
P40342	SWM2_YEAST	-1.33
P36084	MUD2_YEAST	3.52
Q02794	STD1_YEAST	1.39
P25359	RRP43_YEAST	-0.86
Q03533	TDA1_YEAST	1.28
P35193	ATG19_YEAST	-0.48
Q06683	IRC3_YEAST	-0.26
Q06385	VPS74_YEAST	-0.21
Q12257	YD177_YEAST	-0.54
P38234	RFS1_YEAST	-0.1
Q12495	RLF2_YEAST	2.93
P30283	CGS5_YEAST	-0.48
P53250	TWF1_YEAST	0
P46963	CTK3_YEAST	-0.83
P40091	PEA2_YEAST	0.66
P40105	YRF12_YEAST	2.18
P15732	UBC5_YEAST	1.35
P38635	HIS9_YEAST	-0.37
Q08905	FRE3_YEAST	0.42
P31116	DHOM_YEAST	0.35
P39989	YEC8_YEAST	0.72
Q12382	DGK1_YEAST	0.06
P53223	CAX4_YEAST	-0.63
P53148	SP105_YEAST	1.04
P13393	TBP_YEAST	-0.76
P40562	MPH1_YEAST	-0.07
P32798	COT1_YEAST	1.18
P38084	BAP2_YEAST	1.25
P38128	SMP1_YEAST	1.82
P53094	MDS3_YEAST	3
P38734	MUP3_YEAST	0.76
Q03750	TAF8_YEAST	1.84
P00401	COX1_YEAST	-0.82
Q12392	YD21A_YEAST	0.68
Q03702	CCE1_YEAST	-0.53
P0CX58	YP12A_YEAST	3.79
Q12167	RRG1_YEAST	-0.39
P32580	SUV3_YEAST	0.19
P33411	PRP18_YEAST	0.2
P54861	DNM1_YEAST	0.83
P06782	SNF1_YEAST	3.1
Q01846	MDM1_YEAST	1.31
P40456	ESL1_YEAST	2.06
P47185	HXT16_YEAST	0.6
P07342	ILVB_YEAST	0.68
Q06489	MTNA_YEAST	0.07
Q03028	ODC1_YEAST	-0.75
P47771	ALDH2_YEAST	-0.17
P38994	MSS4_YEAST	0.86
P41834	UFE1_YEAST	-0.25
P40187	PIG2_YEAST	-0.24
Q03205	YD042_YEAST	-1.63
P40041	VHR2_YEAST	0.37
P31376	SWC3_YEAST	0.68
P47117	ARP3_YEAST	1.82
P34219	TOD6_YEAST	0.82
Q06595	YP196_YEAST	0.51
P38181	NU170_YEAST	0.66
P48240	MTR3_YEAST	0.2
P47119	ITPA_YEAST	0.69
P47072	YJB6_YEAST	1.93
P43563	MOB2_YEAST	0.7
P39525	CEM1_YEAST	-0.7
P48582	BRO1_YEAST	0.57
P53233	FMP48_YEAST	1.06
P85052	BUD25_YEAST	-0.35
P53939	NIS1_YEAST	1.78
Q03764	EKI1_YEAST	-0.55
P23797	GPI12_YEAST	0.57
P26364	KAD3_YEAST	-1.27
P40962	RTS2_YEAST	-0.45
P13433	RPOM_YEAST	0.58
P47139	YJ68_YEAST	1.5
P40454	PTPA1_YEAST	1.1
Q06010	STE23_YEAST	0.96
P40052	YEQ9_YEAST	0.99
Q12027	YD176_YEAST	0.77
Q08387	DNLI4_YEAST	1.12
P40573	MET28_YEAST	-0.34
P36132	KAE1_YEAST	0.36
P38300	MBA1_YEAST	-1.28
P47116	PTK2_YEAST	1.97
P20606	SAR1_YEAST	-0.73
P15365	DAL5_YEAST	0.24
P18759	SEC18_YEAST	0.37
Q06336	GGA1_YEAST	0.13
P40449	YIQ1_YEAST	0.37
P39931	SS120_YEAST	-1.65
P23900	FPS1_YEAST	4.76
P38126	PCH2_YEAST	-0.89
P09119	CDC6_YEAST	-0.28
P0CX08	DSF1_YEAST	-0.3
P32568	SNQ2_YEAST	0.5
Q12094	TSR3_YEAST	2.08
P53759	DUS1_YEAST	-0.45
Q03441	RMD1_YEAST	2.07
P32906	MNS1_YEAST	0.44
P43586	LOC1_YEAST	0.54
P39704	ERP2_YEAST	-0.62
P27351	AP2B_YEAST	0.77
P41338	THIL_YEAST	0.38
P47031	IML2_YEAST	1.24
P40993	RMRP_YEAST	-1.12
P38786	RPP1_YEAST	-0.38
Q02948	BECN1_YEAST	0.07
Q07788	COS7_YEAST	-0.99
P41833	IME4_YEAST	-0.54
P53114	MED5_YEAST	0.23
P25635	PWP2_YEAST	0.48
P0CD90	AQY2_YEAST	-0.06
Q03323	SDC1_YEAST	-1.17
P53239	COX18_YEAST	0.3
Q12083	MLH3_YEAST	0.43
P41543	OST1_YEAST	0.71
P40885	HXT9_YEAST	0.61
Q04894	ADH6_YEAST	2.69
P38284	ICS2_YEAST	0.07
P12945	NAT1_YEAST	-0.31
Q04120	TSA2_YEAST	-0.87
Q99344	UBA3_YEAST	-0.2
P07251	ATPA_YEAST	-0.11
P19158	IRA2_YEAST	1.98
P40434	YIR7_YEAST	2.51
P43574	GAT1_YEAST	1.88
Q12378	RTR2_YEAST	0.32
Q12507	SFG1_YEAST	-0.37
P36091	DCW1_YEAST	1.86
P38722	YHE9_YEAST	0.11
Q04739	GAL83_YEAST	1.01
Q06604	BSP1_YEAST	2.33
Q99186	AP2M_YEAST	0.53
P09232	PRTB_YEAST	0.52
Q99260	YPT6_YEAST	-0.21
Q06541	ARV1_YEAST	-0.47
P38716	YHR2_YEAST	-0.79
Q06810	OPY2_YEAST	2.4
P09440	C1TM_YEAST	0.33
Q12517	DCP1_YEAST	1.89
Q03263	YM8M_YEAST	0.77
P32464	HYM1_YEAST	-0.75
P40014	SPC25_YEAST	1.19
P40368	NUP82_YEAST	-0.09
Q07967	YL030_YEAST	0.57
Q08496	DIA2_YEAST	0.73
P38692	KIC1_YEAST	3.27
Q08213	NGL1_YEAST	-0.08
P25334	CYPR_YEAST	0.44
P00420	COX3_YEAST	-1.12
P53196	RPN14_YEAST	-0.17
P38892	CRG1_YEAST	-0.17
Q03233	ADD37_YEAST	1.27
P53835	PRM1_YEAST	0.41
Q04632	COG8_YEAST	0.11
P54964	ORN_YEAST	-0.72
P32562	CDC5_YEAST	-0.04
P38150	YB9Z_YEAST	1.19
P42834	MDJ2_YEAST	-1.11
P39962	KC13_YEAST	1.81
P14736	RAD4_YEAST	1.29
P24384	PRP22_YEAST	0.17
P39975	RMD6_YEAST	-0.25
P36148	GPT2_YEAST	0.1
P40357	SEC9_YEAST	5.57
P40065	MAM1_YEAST	-0.55
Q03559	YM8V_YEAST	1.1
P35691	TCTP_YEAST	-0.83
Q04216	DLT1_YEAST	0.41
P35182	PP2C1_YEAST	-0.04
Q08054	CSI2_YEAST	1.99
P24309	DBR1_YEAST	-0.32
Q3E705	EFG1P_YEAST	-0.24
P40493	BMT5_YEAST	-0.43
P32367	TFC1_YEAST	0.67
P39933	TF3A_YEAST	0.16
P47182	AAD10_YEAST	-0.61
P32074	COPG_YEAST	0.73
P53166	MRH4_YEAST	0.84
Q03898	FIN1_YEAST	0.65
P27697	COQ8_YEAST	0.13
P53066	YGZ2_YEAST	-0.31
P29952	MPI_YEAST	-0.38
P39709	SEO1_YEAST	-0.57
Q06549	CDD_YEAST	0.4
Q12310	PRR2_YEAST	0.18
P38362	YB8J_YEAST	-0.1
P27809	KRE2_YEAST	-0.4
P38900	YH19_YEAST	2.12
P41817	CUP9_YEAST	1.02
P13902	INO4_YEAST	-0.87
Q03723	OST6_YEAST	0.12
Q03631	WAR1_YEAST	1.33
P32558	SPT16_YEAST	1.71
Q12672	RL21B_YEAST	0.75
P40452	COA1_YEAST	-0.62
P17119	KAR3_YEAST	0.26
P53135	SLD3_YEAST	0.8
P53824	SNZ2_YEAST	-0.05
P17891	CLC1_YEAST	0.49
P53036	SAP4_YEAST	-0.1
P38620	KPR2_YEAST	-0.14
P53600	COPZ_YEAST	-0.19
Q01589	SED1_YEAST	2.21
P39533	ACON2_YEAST	0.63
Q08750	MUM3_YEAST	-0.01
P39102	XDJ1_YEAST	2.58
Q01574	ACS1_YEAST	1.06
P40469	MET18_YEAST	-0.25
Q04533	METX_YEAST	0.71
Q04019	YM80_YEAST	0.96
P40529	AGE2_YEAST	1.98
Q03144	SNO1_YEAST	-0.92
P36006	MYO3_YEAST	1.44
P25451	PSB3_YEAST	-0.29
Q08914	HSP33_YEAST	0.37
P35844	KES1_YEAST	-0.72
P06243	CDC7_YEAST	0.22
P38801	LRP1_YEAST	-1.68
P39081	PCF11_YEAST	0.88
P53962	YND5_YEAST	-0.37
Q99321	DDP1_YEAST	0.4
P32833	ORC2_YEAST	0.16
P12688	YPK1_YEAST	1.67
P48524	BUL1_YEAST	1.9
P14291	RED1_YEAST	0.62
P32908	SMC1_YEAST	0.94
Q12091	DAP1_YEAST	2.54
P38298	YPC1_YEAST	-1.5
P0CX97	YP283_YEAST	0.28
P43550	DAK2_YEAST	2.16
P53867	ATG4_YEAST	1.13
P33412	ECT1_YEAST	0.18
P21372	PRP5_YEAST	0.54
Q03102	YMN1_YEAST	-0.35
P36086	YKH1_YEAST	-0.47
P03876	AI2M_YEAST	0.01
Q05776	UPS1_YEAST	-0.06
Q02825	SEN54_YEAST	0.67
P12709	G6PI_YEAST	-0.15
P53248	PEX8_YEAST	-0.58
P17076	RL8A_YEAST	0.52
P53616	SUN4_YEAST	3.16
P47082	AVT1_YEAST	1.03
P15807	MET8_YEAST	-0.37
Q12218	TIR4_YEAST	0.4
Q02890	PNG1_YEAST	0.07
P36032	MCH2_YEAST	0.42
P22224	SEC15_YEAST	0.4
P32915	SC61A_YEAST	0.31
P35194	UTP20_YEAST	0.15
P42073	REF2_YEAST	0.38
Q12175	MSH5_YEAST	0.1
P36016	LHS1_YEAST	0.48
P47001	CIS3_YEAST	1.15
Q03796	TPP1_YEAST	-1.12
P32622	YEF1_YEAST	0.88
P53320	MTM1_YEAST	0.38
P39009	DUN1_YEAST	-0.86
Q9ZZX1	SCE4_YEAST	0.54
Q04951	SCW10_YEAST	0.74
P20459	IF2A_YEAST	0.08
Q12123	DCS2_YEAST	-1.3
Q08956	YIG1_YEAST	0.93
Q03497	STE20_YEAST	3.11
Q06328	YPQ2_YEAST	0.58
P04147	PABP_YEAST	4.38
P08456	PSS_YEAST	0.05
Q07990	YL042_YEAST	0.12
P0CL37	YD545_YEAST	0.28
P23301	IF5A1_YEAST	-0.67
P38280	YSW1_YEAST	0.98
P25608	YCZ2_YEAST	0.79
Q99341	FYV1_YEAST	0.54
P47138	DPH4_YEAST	-0.3
P47008	SFH5_YEAST	-1.75
P40487	DPH1_YEAST	-0.02
P25585	FYV5_YEAST	0.53
Q05521	DPP1_YEAST	-0.68
P47074	MAD3_YEAST	1.78
P13856	RSR1_YEAST	0.35
P53890	BNI5_YEAST	1.49
Q07549	SNA4_YEAST	1.69
P36111	YKZ5_YEAST	0.63
Q03483	YD22A_YEAST	0.72
P16622	HEMH_YEAST	-0.7
P0C2I6	YL13B_YEAST	4.17
P43560	LAM5_YEAST	1.28
P38163	SRO77_YEAST	0.87
Q07880	YL044_YEAST	-0.61
P23500	MRS4_YEAST	0.37
Q12322	YO114_YEAST	-0.08
P47047	MTR4_YEAST	1.25
Q99219	YI31A_YEAST	0.72
Q12418	GIS3_YEAST	0.4
P53983	ASI3_YEAST	-0.62
P40527	ATC7_YEAST	0.36
Q02207	FOX2_YEAST	1.09
P53910	YNO0_YEAST	-1.33
Q06108	RGC1_YEAST	1.96
Q08686	THTR_YEAST	-0.18
Q04279	SEG1_YEAST	2.05
Q12326	PMG3_YEAST	1.42
P0CX23	RL20A_YEAST	-0.63
P00358	G3P2_YEAST	0.08
P36083	YKH5_YEAST	0.06
P21147	ACO1_YEAST	0.77
P32792	YHH7_YEAST	-1.02
P38240	YBR4_YEAST	-0.72
P39731	MTW1_YEAST	-0.22
P09734	TBA3_YEAST	0.09
P22214	SEC22_YEAST	-0.89
P06779	RAD7_YEAST	0.67
P53735	ZRG17_YEAST	2.32
P0CE11	GMT2_YEAST	-0.32
P05626	ATPF_YEAST	-0.06
Q03373	DIG2_YEAST	2.81
P50091	PEX21_YEAST	0.14
P38116	ARL1_YEAST	-1.2
Q06629	HDA2_YEAST	0.84
A0A023PXN9	YI171_YEAST	-1.2
P32867	SSO1_YEAST	-0.76
P32644	ECM32_YEAST	1.59
P15790	CSK21_YEAST	0.76
P28519	RAD14_YEAST	1.98
Q3E7Y5	YB111_YEAST	0.6
P53246	ENV11_YEAST	0.16
P08459	SPS2_YEAST	0.01
Q06350	CHI2_YEAST	2.64
P38336	POP4_YEAST	0.84
P47019	ALB1_YEAST	-0.53
P40502	AIM19_YEAST	0.08
P40011	RRAAH_YEAST	-0.68
A0A023PXA5	YA19A_YEAST	-0.16
P38243	YBS1_YEAST	-0.41
P32794	AFG2_YEAST	0.39
P39016	MPT5_YEAST	1.02
P27796	THIK_YEAST	0.21
P40308	TGL3_YEAST	1.26
P33760	PEX6_YEAST	0.25
P10566	MRS3_YEAST	-0.03
P47148	YJ81_YEAST	-0.32
Q12182	YO342_YEAST	-0.41
P22336	RFA1_YEAST	0.93
Q02256	PVH1_YEAST	-0.26
P23201	SPA2_YEAST	1.51
Q03465	RPN4_YEAST	0.68
P28240	ACEA_YEAST	-0.47
Q06677	SWA2_YEAST	1.25
P32943	CGS6_YEAST	-0.29
P32581	IME2_YEAST	3.11
Q02866	MUK1_YEAST	2.28
Q9ZZX0	AI5B_YEAST	-0.83
P40467	ASG1_YEAST	1.59
Q99385	VCX1_YEAST	-1.3
Q12036	PPT2_YEAST	-0.79
P27515	URK1_YEAST	0.2
P33339	TFC4_YEAST	-0.08
P32352	ERG2_YEAST	-0.84
P53071	YGY5_YEAST	-0.47
Q08774	RRG7_YEAST	-0.45
P39924	HXT13_YEAST	0.66
P53108	YIP5_YEAST	1.29
P06208	LEU1_YEAST	0
P42944	GZF3_YEAST	0.66
P50089	YG51_YEAST	1
P54786	ZDS2_YEAST	0.59
Q07454	YD073_YEAST	0.37
P11986	INO1_YEAST	-0.31
P53889	FMP41_YEAST	-0.25
P36018	YPT52_YEAST	-0.98
P47912	LCF4_YEAST	0.02
Q02908	ELP3_YEAST	1.41
Q04121	NHX1_YEAST	1.08
P47181	YJ9S_YEAST	0.29
P20050	HOP1_YEAST	-0.01
P38281	APD1_YEAST	-1.42
P25568	ATG22_YEAST	-0.54
Q03557	GATA_YEAST	0.99
Q06090	RM51_YEAST	0.85
P39936	IF4F2_YEAST	2.18
Q06506	RRP9_YEAST	0.16
P53982	IDHH_YEAST	0.28
P47043	ZAP1_YEAST	1.43
Q04175	SXM1_YEAST	-0.5
Q07825	FRA1_YEAST	2.68
P40047	ALDH5_YEAST	0.54
Q12513	TMA17_YEAST	-0.37
P25087	ERG6_YEAST	0.99
Q06479	YL352_YEAST	1.5
P03873	MBI2_YEAST	-0.6
P53388	DIP5_YEAST	0.81
Q08217	PSK2_YEAST	0.87
P39518	LCF2_YEAST	0.9
P53830	CUS2_YEAST	-0.15
P06168	ILV5_YEAST	0.37
P36139	PET10_YEAST	-0.87
P32900	SKG6_YEAST	1.83
P53164	NPY1_YEAST	-0.14
P89105	CTR9_YEAST	0.76
P26370	UGA3_YEAST	-0.54
P38225	FAT1_YEAST	1.06
P09624	DLDH_YEAST	-0.31
Q08992	HSP32_YEAST	0.34
P47087	YJY2_YEAST	0.47
Q08581	SLK19_YEAST	-0.07
Q08417	RSB1_YEAST	-0.91
P00127	QCR6_YEAST	-2.82
Q08980	YP264_YEAST	-1.07
P18414	ERD2_YEAST	-1.55
Q12441	YD12A_YEAST	3.99
P32337	IMB3_YEAST	0.48
P38347	EFM2_YEAST	-0.12
P53045	MSMO_YEAST	0.19
Q08911	FDH1_YEAST	-0.52
Q12512	ZPS1_YEAST	-0.8
P40512	CSN11_YEAST	0.36
P25369	LSB5_YEAST	2.87
P38265	IML3_YEAST	0.5
Q02521	SPP2_YEAST	-0.28
P53870	YNT3_YEAST	-0.24
P46655	SYEC_YEAST	0.18
P25580	PBN1_YEAST	-0.11
P53286	BTN2_YEAST	3.47
Q00055	GPD1_YEAST	-0.52
P53207	SNU71_YEAST	-0.31
Q03446	RCR2_YEAST	-0.08
Q05791	CD123_YEAST	-0.36
Q04947	RTN1_YEAST	0.17
P40985	HUL4_YEAST	0.77
P38932	VPS45_YEAST	-0.44
Q06159	ATG39_YEAST	0.8
P43123	UAP1_YEAST	-0.3
P43573	BUD27_YEAST	1.12
P46982	MNN5_YEAST	1.14
P13185	KIN1_YEAST	1.57
P38773	DOG2_YEAST	-0.19
P21304	PWP1_YEAST	0.48
P53178	ALG13_YEAST	-1.36
Q02203	YKY5_YEAST	-0.59
P22202	HSP74_YEAST	1.28
P36112	MIC60_YEAST	0.61
Q12173	YG31A_YEAST	0.91
Q04177	UTP5_YEAST	-0.41
Q03177	YMZ2_YEAST	1.83
P33314	BUD2_YEAST	2.17
P47127	AIM24_YEAST	-0.5
P54839	HMCS_YEAST	0.12
Q99337	YN12B_YEAST	4.16
P38770	BRL1_YEAST	0.19
P08004	CHS1_YEAST	1.5
P53195	COG7_YEAST	-1.36
P38179	ALG3_YEAST	-0.82
P48813	GNP1_YEAST	0.71
P49954	NIT3_YEAST	-0.46
Q02659	YP025_YEAST	0.52
Q12379	SWM1_YEAST	1.78
Q08471	MSA1_YEAST	2.17
Q08634	YO238_YEAST	-0.41
P38439	LEO1_YEAST	-0.1
P25659	FUB1_YEAST	3.93
P32634	PMD1_YEAST	2.3
P39547	UIP3_YEAST	-0.55
P40360	NAGS_YEAST	0.24
Q05468	RQC1_YEAST	0.51
P32333	MOT1_YEAST	0.35
Q08989	YP277_YEAST	1.88
P47136	BUD4_YEAST	1.61
Q04372	TAP42_YEAST	-1.09
P36534	RM40_YEAST	-0.08
Q03687	YMP0_YEAST	-0.22
P38748	ETP1_YEAST	-0.09
Q03792	RIM13_YEAST	0.33
P39940	RSP5_YEAST	2.43
P23503	NAR1_YEAST	0.99
P40519	YIG0_YEAST	-0.16
P19812	UBR1_YEAST	2.11
Q08421	ETT1_YEAST	-0.82
Q08683	APC5_YEAST	-0.07
P38115	ARA1_YEAST	-0.04
P39551	PRM9_YEAST	-0.72
P32891	DLD1_YEAST	0.75
P38248	ECM33_YEAST	0.86
P43562	YFE0_YEAST	-0.49
P35688	LRG1_YEAST	0.49
P40362	UTP18_YEAST	0.49
Q06836	SYT1_YEAST	2.26
P38749	YAP3_YEAST	2.15
P26754	RFA2_YEAST	1.2
Q03761	TAF12_YEAST	2.1
Q01662	MAP1_YEAST	1.47
P32454	APE2_YEAST	-0.17
Q07830	GPI13_YEAST	0.03
P12685	TRK1_YEAST	2.47
P25602	YCH6_YEAST	-1.02
P25299	RNA15_YEAST	0.98
P38782	MED6_YEAST	2.76
P39678	MBP1_YEAST	1.88
Q8TGP8	YD086_YEAST	-1.27
P43542	COS4_YEAST	-0.85
P32563	VPH1_YEAST	0.1
P39987	HSP7E_YEAST	0.46
Q12320	GLO4_YEAST	-1.05
P38072	SCO2_YEAST	0.59
P38205	NCL1_YEAST	0.38
Q03455	MSC2_YEAST	0.96
Q04018	YM79_YEAST	4.8
P07256	QCR1_YEAST	0.6
Q08932	RSA1_YEAST	2.44
P38288	TOS1_YEAST	3.72
P36024	SIS2_YEAST	0.45
P08638	LEUR_YEAST	1.61
P46958	IDS2_YEAST	1.44
P19659	MED15_YEAST	2.88
P38880	MDM31_YEAST	-0.17
Q05050	EIS1_YEAST	0.36
Q03012	SPP1_YEAST	2.12
P52868	CWC23_YEAST	-0.92
P38427	TSL1_YEAST	1
P04161	PUR3_YEAST	-1.31
P34216	EDE1_YEAST	1.62
P32317	AFG1_YEAST	0.57
Q12194	YP066_YEAST	0.98
Q01976	ADPP_YEAST	-0.35
P52917	VPS4_YEAST	-0.13
Q06103	RPN7_YEAST	-0.9
P38742	NPR3_YEAST	1.99
P37838	NOP4_YEAST	1.18
Q03944	VPS64_YEAST	1.74
P49723	RIR4_YEAST	-0.65
Q92328	MDM12_YEAST	-0.47
Q12501	YO22B_YEAST	1.03
P36158	YK58_YEAST	-0.65
P35207	SKI2_YEAST	5.48
Q12275	YO093_YEAST	0.48
P25593	YCG8_YEAST	-1.83
P32897	TIM23_YEAST	0.14
P47108	URB2_YEAST	-0.79
P53851	TEX1_YEAST	-0.21
P53721	RCF2_YEAST	-0.45
P33311	MDL2_YEAST	0.46
Q12172	YRR1_YEAST	3.7
P48365	GYP7_YEAST	0.34
P38871	SSP1_YEAST	1.37
Q04412	AGE1_YEAST	0.92
P18409	MDM10_YEAST	0.39
P46992	YJR1_YEAST	0.63
P38195	ECM13_YEAST	0.86
P17649	GABAT_YEAST	0.83
Q12074	SPEE_YEAST	-1.12
P0CY00	YL66A_YEAST	0.59
P40162	YNU5_YEAST	-1.17
Q07913	NSE1_YEAST	-0.85
Q7LHG5	YI31B_YEAST	1.25
Q06142	IMB1_YEAST	-0.71
Q02792	XRN2_YEAST	4.69
P34233	ASH1_YEAST	3.06
P32447	ASF1_YEAST	-0.25
P38861	NMD3_YEAST	0.17
Q04373	PUF6_YEAST	-0.34
P39718	PEX22_YEAST	-0.08
Q12491	YB21B_YEAST	1.18
P0CX30	RS23B_YEAST	-0.51
P53954	ALG11_YEAST	-0.36
O13529	ECM12_YEAST	-0.13
P19541	RDS2_YEAST	0.35
Q92392	YO11A_YEAST	4.12
P0C5N3	YG41A_YEAST	-0.97
P06786	TOP2_YEAST	0.59
Q06640	YD306_YEAST	0.18
P53215	THG1_YEAST	-1.18
Q01448	HPC2_YEAST	1.18
Q12191	BUG1_YEAST	2.81
P20967	ODO1_YEAST	1.18
P0CX68	YL11A_YEAST	3.99
P37304	PAM1_YEAST	3.08
P39926	SSO2_YEAST	-0.4
P40579	YIV5_YEAST	-0.69
Q07887	LDB18_YEAST	-1.44
P53874	UBP10_YEAST	1.5
P08466	NUC1_YEAST	1.03
P54790	ORC3_YEAST	-0.59
Q05779	COQ9_YEAST	-0.77
P53324	SAY1_YEAST	0.18
P38793	TRM5_YEAST	0.22
P32864	RAEP_YEAST	1.01
P28007	GAR1_YEAST	7.69
P36057	SRPB_YEAST	-0.75
Q12530	RMP1_YEAST	-2.23
P39520	IFH1_YEAST	3.2
P39717	GPB2_YEAST	0.6
P40093	YEY6_YEAST	-0.39
P48353	HLJ1_YEAST	5.27
P11484	SSB1_YEAST	1.33
P21595	CP56_YEAST	1.14
P40031	SPO73_YEAST	-0.19
Q12276	HER1_YEAST	1.3
Q02803	OAZ_YEAST	-0.37
P32465	HXT1_YEAST	0.89
Q12451	OSH2_YEAST	1.49
P11710	FUS1_YEAST	1.15
P40053	AIM9_YEAST	-0.75
Q08962	NIP7_YEAST	-1.11
P40987	CIN1_YEAST	-0.05
P38125	DTR1_YEAST	0.4
P29453	RL8B_YEAST	0.1
P08468	PT111_YEAST	-0.65
Q03254	FCP1_YEAST	1.57
P20134	SFL1_YEAST	2.44
Q12482	AGC1_YEAST	0.46
P38124	FLR1_YEAST	0.74
P06844	SPT3_YEAST	0.24
Q12674	ATC8_YEAST	1.51
P24004	PEX1_YEAST	0.29
P53344	COS6_YEAST	-0.6
P53219	IMO32_YEAST	1.25
P38703	LAG1_YEAST	0.16
P43602	ROG3_YEAST	1.45
Q06436	MAG2_YEAST	0.94
P21826	MASZ_YEAST	-0.41
P17890	RPC7_YEAST	2.9
P42950	GSM1_YEAST	0.84
P39004	HXT7_YEAST	0.57
P36100	T2EA_YEAST	4.48
P38343	SLM6_YEAST	-1.07
Q00362	2ABA_YEAST	1.79
Q12266	YB11A_YEAST	2.19
Q12179	YP245_YEAST	0.84
Q12199	TIP41_YEAST	0.24
P32838	PP2A4_YEAST	0.13
P25652	YCX7_YEAST	1.43
P07264	LEUC_YEAST	0.61
P38319	TYDP1_YEAST	0.45
Q06625	GDE_YEAST	1.96
P53920	NM111_YEAST	1.11
P53329	YG5Q_YEAST	0.67
P53088	CTU1_YEAST	-0.43
P32862	RGT1_YEAST	3.65
P42937	YCH1_YEAST	-1.09
P40546	FAF1_YEAST	1.87
Q04178	HPRT_YEAST	-0.96
P40353	ATF1_YEAST	0.49
Q07649	YD221_YEAST	1.25
Q06208	RIF2_YEAST	-1.34
P41812	POP1_YEAST	0.56
Q07879	ATG10_YEAST	0.84
P53263	YG2U_YEAST	-0.6
Q03860	TVP15_YEAST	-1.32
Q03772	CWC15_YEAST	-0.45
P41811	COPB2_YEAST	0.48
P0CE69	YK104_YEAST	0.26
P23060	MAK32_YEAST	0.53
P36157	MSA2_YEAST	1.21
P27616	PUR7_YEAST	-0.56
P15108	HSC82_YEAST	0.73
P38358	VBA2_YEAST	0.35
P47190	PMT3_YEAST	0.09
P39728	YAD7_YEAST	-1.36
P43635	CISY3_YEAST	0.94
P51601	GCH1_YEAST	0.4
Q12408	NPC2_YEAST	-0.86
Q00618	PGTA_YEAST	-1.72
Q05533	INM2_YEAST	2.27
P25357	SNT1_YEAST	3.44
P38876	PTH_YEAST	-1.45
Q04228	UBX2_YEAST	0.91
P38731	ARN1_YEAST	-0.23
P53437	RRN9_YEAST	-0.12
P38254	TTL_YEAST	0.16
P32901	PTR2_YEAST	0.71
P38147	CHK1_YEAST	-0.29
P46970	NMD5_YEAST	-0.32
P25298	RNA14_YEAST	-0.47
P43546	YFL57_YEAST	-0.77
P36126	SPO14_YEAST	1.23
P36097	TTI1_YEAST	-0.54
P15565	TRM1_YEAST	0.41
P31377	STX8_YEAST	-0.22
Q08278	MED7_YEAST	0.52
P27810	KTR1_YEAST	0.43
Q04958	NTE1_YEAST	1.74
P46669	RPA43_YEAST	0.27
P12385	ERF1_YEAST	0.64
P52919	NBP1_YEAST	0.95
Q07658	YD228_YEAST	0.06
Q06839	YP097_YEAST	0.67
Q01919	KIN4_YEAST	1.44
P40561	SGN1_YEAST	1.05
P20434	RPAB1_YEAST	-0.22
Q03148	SNZ1_YEAST	1.39
P47113	BFA1_YEAST	1.44
O13522	YD396_YEAST	-0.68
P38338	YB9F_YEAST	-0.25
Q12006	PFA4_YEAST	-0.11
Q04749	AVO2_YEAST	2.51
Q05905	HRI1_YEAST	1.92
Q05946	UTP13_YEAST	-0.31
Q12241	VAM3_YEAST	-0.21
P29461	PTP2_YEAST	0.15
O13297	CET1_YEAST	0.98
P38120	RT09_YEAST	0.18
P0CX29	RS23A_YEAST	-0.51
P04050	RPB1_YEAST	7.18
P39961	YE14_YEAST	0.36
P25560	RER1_YEAST	0
Q05919	VPS38_YEAST	0.17
A0A023PZD0	YF036_YEAST	0.88
P25042	ROX1_YEAST	2.69
Q07793	YD13B_YEAST	4.16
Q04751	NAA40_YEAST	-0.02
P25632	RSC6_YEAST	0.79
P38286	MKAR_YEAST	0.64
P32790	SLA1_YEAST	3.3
P25349	YCP4_YEAST	0.31
P69771	DID2_YEAST	-1.93
Q03954	SPC19_YEAST	-1.1
P54781	ERG5_YEAST	-0.72
Q03370	PEX29_YEAST	2.3
Q06162	NKP2_YEAST	-1.58
P39988	BUD16_YEAST	0.33
P54113	PUR91_YEAST	0.38
P46993	ASG7_YEAST	-2.26
P53067	IMB5_YEAST	-0.1
Q06201	GMC2_YEAST	-1.75
Q03153	ATP25_YEAST	0.1
P18900	COQ1_YEAST	0.46
Q12032	AIM41_YEAST	-1.14
P41940	MPG1_YEAST	-0.08
P38989	SMC2_YEAST	0.65
P53131	PRP43_YEAST	0.43
Q07963	UBR2_YEAST	2.15
Q12442	IZH2_YEAST	-0.87
P52918	MSN5_YEAST	-0.09
P53083	MDM34_YEAST	-0.05
P35209	SPT21_YEAST	1.54
Q08760	RAX1_YEAST	0.17
Q00381	AP2S_YEAST	-0.72
Q03002	FRK1_YEAST	1.29
P23493	MBR1_YEAST	1.87
P39567	IMDH1_YEAST	3.25
Q06349	DXO1_YEAST	-0.07
P41815	BAP3_YEAST	0.91
P32579	SUA5_YEAST	-0.18
P32626	ENOPH_YEAST	-0.49
Q04489	ASND1_YEAST	0.7
P40559	INP51_YEAST	-0.27
P32478	HS150_YEAST	1.32
P47137	YJ66_YEAST	-0.18
P38219	OLA1_YEAST	0.01
P39523	YM11_YEAST	2.75
Q03466	EBS1_YEAST	0.64
P14772	BPT1_YEAST	-0.01
P53725	MPP6_YEAST	-0.15
P38151	PBP2_YEAST	-0.84
P40506	PPCS_YEAST	1.28
P25847	MSH2_YEAST	0.27
Q12316	YG13B_YEAST	3.88
P36163	OMA1_YEAST	0.02
P53064	RTF1_YEAST	1.96
Q12359	ATO3_YEAST	1.24
Q06689	YL413_YEAST	0.42
P26309	CDC20_YEAST	0.79
P38878	LNP_YEAST	0.47
P25569	GID7_YEAST	0.45
P24280	SEC14_YEAST	-0.03
P33413	DUR3_YEAST	0.04
P25390	SSK22_YEAST	-0.04
P40552	TIR3_YEAST	0.68
P32339	HMX1_YEAST	-0.44
Q08208	NOP12_YEAST	0.53
P28584	TRK2_YEAST	1.52
P53298	OKP1_YEAST	0.32
Q08949	DDC1_YEAST	-0.07
Q08970	MMT2_YEAST	1.16
Q02326	RL6A_YEAST	0.23
Q08001	LAM6_YEAST	2.04
P50113	LYS5_YEAST	-0.95
P34220	YBF5_YEAST	-0.78
Q06698	YL419_YEAST	0.21
P41818	GLC8_YEAST	-0.69
P19880	YAP1_YEAST	2.57
P38883	RIX1_YEAST	0.19
Q12493	NKP1_YEAST	-0.26
P36156	GTO2_YEAST	0.8
A0A023PXL1	YH019_YEAST	0.59
Q12446	LAS17_YEAST	4.08
P38013	AHP1_YEAST	0.52
Q6Q5F3	YP053_YEAST	-0.22
Q03407	PKH1_YEAST	1.64
P36131	SPC34_YEAST	-0.26
Q02799	LEE1_YEAST	1.17
P00958	SYMC_YEAST	0.4
P32913	VPS17_YEAST	3.18
P35842	PPAB_YEAST	1.18
P43589	SAD1_YEAST	-0.48
P42222	ERR3_YEAST	-0.41
P39991	YEC5_YEAST	0.49
P38730	YHE1_YEAST	-1.05
Q12511	PDP1_YEAST	0.2
P22203	VATE_YEAST	-0.65
Q02981	YP109_YEAST	-0.04
P53894	CBK1_YEAST	3.95
Q12297	TAF3_YEAST	0.01
P24031	PPA3_YEAST	0.18
P38971	ALP1_YEAST	1.02
Q07528	ATG20_YEAST	0.81
P53321	YG5G_YEAST	-0.32
Q12071	VPS54_YEAST	0.78
P17967	PDI_YEAST	-0.22
P0CH64	DDI3_YEAST	-1.07
P32466	HXT3_YEAST	1.06
P25583	KAR4_YEAST	0.24
P38738	OCA5_YEAST	1.88
P34163	TGL1_YEAST	0.78
Q12108	RTC5_YEAST	0.75
P46677	TAF1_YEAST	3.85
P38682	GLO3_YEAST	2.13
P48559	YPT11_YEAST	1.8
P21623	DIT1_YEAST	-0.26
Q05648	MRX10_YEAST	-0.18
P32559	MSS1_YEAST	-0.45
Q03208	YML9_YEAST	1.93
Q06679	UTP4_YEAST	0.23
P08679	CISY2_YEAST	-0.56
P32179	MET22_YEAST	0.21
P53184	PNC1_YEAST	-0.77
P0CX18	YA066_YEAST	0.97
Q05854	YL278_YEAST	2.67
P53234	YG21_YEAST	-0.6
P53323	BUD32_YEAST	-0.61
P0CE68	NFT1_YEAST	-0.01
P05694	METE_YEAST	0.17
P46951	YPP1_YEAST	-0.1
P42943	TCPH_YEAST	-0.19
P0CF19	YO162_YEAST	-1.53
P40486	SHQ1_YEAST	-0.65
Q07844	RIX7_YEAST	0.59
P0CY01	YL67A_YEAST	0.59
Q06543	GPN3_YEAST	-1.3
P17255	VATA_YEAST	0.6
Q04935	COX20_YEAST	-1.39
P36017	VPS21_YEAST	-0.31
Q06644	PMT7_YEAST	0.65
P33759	RT05_YEAST	-0.7
P40081	MGDP1_YEAST	1.06
Q07622	ACK1_YEAST	2.61
P38907	CHL4_YEAST	0.04
P38746	YLF2_YEAST	0.17
P32796	CACP_YEAST	0.64
P22007	FNTB_YEAST	0.12
Q06554	IRC20_YEAST	0.6
P18412	TEC1_YEAST	1.22
P16151	ERD1_YEAST	-1.23
P32380	SP110_YEAST	2.7
P40186	PCL7_YEAST	1.07
Q06058	SEI1_YEAST	-0.8
P89102	SEC5_YEAST	-0.23
P38956	SNF11_YEAST	-0.28
Q6Q5H1	YP14A_YEAST	4.13
P50943	RRT16_YEAST	-1.14
P40202	CCS1_YEAST	-0.23
P0C2J7	YH41B_YEAST	2.19
P36421	SYYC_YEAST	-0.26
Q12143	NSL1_YEAST	-0.2
P39983	YEG7_YEAST	0.8
P53904	TBCB_YEAST	0.04
P32621	GDA1_YEAST	0.52
P11433	CDC24_YEAST	0.7
P20051	PYRC_YEAST	0.38
Q06098	ISR1_YEAST	0.9
P38355	YB8B_YEAST	-0.51
P50946	OCA1_YEAST	-0.21
P39000	SHC1_YEAST	1.85
P0CX49	RL18A_YEAST	0.06
P38720	6PGD1_YEAST	0.98
P25389	KCC4_YEAST	0.96
P40084	RTR1_YEAST	0.17
P53075	SHE10_YEAST	-0.4
P0CX37	RS6A_YEAST	0.84
P32477	GSH1_YEAST	-0.53
P25360	PHO87_YEAST	0.53
P54854	HXT15_YEAST	0.61
P49704	PRP31_YEAST	0.63
P43605	ECO1_YEAST	-0.2
Q07541	YD121_YEAST	-0.98
Q08162	RRP44_YEAST	0.91
P20795	VPS33_YEAST	-0.52
Q04322	GYL1_YEAST	1.27
O94085	YL339_YEAST	-0.17
P48439	OST3_YEAST	-0.31
Q12215	WSC3_YEAST	3.82
P50077	CCH1_YEAST	1.63
Q03829	YM39_YEAST	0.24
P25565	YCA2_YEAST	-1.31
Q12383	TRM13_YEAST	0.31
P00359	G3P3_YEAST	-0.26
P25627	BUD23_YEAST	-0.09
Q08929	GUP2_YEAST	-0.93
P53273	YG35_YEAST	1.02
Q06703	CDA2_YEAST	-0.12
P07285	TRPD_YEAST	0.39
P00560	PGK_YEAST	-0.4
P52290	PPAD_YEAST	1.24
P53123	MRM2_YEAST	-0.11
Q04461	YM01_YEAST	3.49
P35995	YKW2_YEAST	0.07
P20095	PRP2_YEAST	1.07
P0CF22	YI167_YEAST	-0.36
P40856	SA185_YEAST	-0.07
P32786	RRN6_YEAST	0.6
P34250	SEG2_YEAST	1.77
P36107	AUR1_YEAST	-0.27
P33442	RS3A1_YEAST	-0.54
P32912	VAM7_YEAST	-0.08
Q04031	RRP17_YEAST	0.03
Q03835	GLRX3_YEAST	0.06
P53301	CRH1_YEAST	2.18
Q08959	PGC1_YEAST	0.06
P21827	RCC1_YEAST	0.87
Q12532	RQC2_YEAST	3.34
P07252	CBP1_YEAST	-0.95
P32771	FADH_YEAST	0.45
P40474	QDR2_YEAST	0.15
Q08109	HRD1_YEAST	0.74
P33734	HIS5_YEAST	0.29
P38287	CSH1_YEAST	-0.08
P38898	YH17_YEAST	3.28
P18899	DDR48_YEAST	8.89
Q01926	MRS2_YEAST	-0.28
Q02873	YP107_YEAST	3.11
P53964	YND3_YEAST	-0.58
P05740	RL17A_YEAST	-1.24
P08432	DCOR_YEAST	-0.25
P53168	DUO1_YEAST	1.42
P36004	KKQ8_YEAST	1.74
P36104	SWD2_YEAST	1.24
P10963	PCKA_YEAST	0.43
P21651	RE107_YEAST	-0.44
P40303	PSA4_YEAST	-0.39
P32836	GSP2_YEAST	0.13
P25368	RRP7_YEAST	-1.83
P40468	TAO3_YEAST	1.76
P47159	YJ94_YEAST	-0.11
P39968	VAC8_YEAST	-0.5
Q02983	RRN5_YEAST	-0.36
Q04311	VMS1_YEAST	0.47
P42841	PFS2_YEAST	0.15
P38301	GDT1_YEAST	-0.56
Q02204	RM13_YEAST	-1.53
P47002	SSY5_YEAST	1.92
P53739	FPK1_YEAST	3.35
P10862	RAD18_YEAST	1.71
P32461	DPH2_YEAST	-0.62
Q06709	REH1_YEAST	1.3
Q07457	BRE1_YEAST	-0.07
P07246	ADH3_YEAST	0.9
Q08622	GEP3_YEAST	0.1
Q08144	TLG2_YEAST	2.33
P10127	ADH4_YEAST	-0.57
P40048	PTP3_YEAST	1.42
P43579	IES1_YEAST	0.28
Q06538	CSC1_YEAST	0.58
P32377	MVD1_YEAST	0.04
P47135	JSN1_YEAST	2.79
P32597	STH1_YEAST	0.26
Q03290	TFB3_YEAST	2.07
P09007	SRD1_YEAST	-0.21
P23180	AIM17_YEAST	0.13
Q08409	AUS1_YEAST	1.28
P32861	UGPA1_YEAST	-0.6
Q92317	NCB2_YEAST	-1.76
Q12117	MRH1_YEAST	-0.19
Q03921	DOP1_YEAST	1.01
P36052	NDUF7_YEAST	0.24
Q12494	KCS1_YEAST	1.63
P32474	EUG1_YEAST	-0.5
Q03714	USA1_YEAST	0.53
P28707	SBA1_YEAST	2.67
Q04608	YD124_YEAST	-0.12
Q07729	GUAD_YEAST	-0.39
Q08844	YO365_YEAST	-1.09
Q08553	SYC1_YEAST	1.31
P53129	MON1_YEAST	0.69
Q04226	TAF11_YEAST	0.33
P05150	OTC_YEAST	-0.77
P0CX45	RL2A_YEAST	0.2
P39742	SEC72_YEAST	-1.07
P22149	AFT1_YEAST	1.53
P36125	GMH1_YEAST	-1.44
P15454	KGUA_YEAST	0.3
P25646	PDP2_YEAST	1.77
Q7M4S9	YB113_YEAST	2.42
Q04868	ELP6_YEAST	-0.59
Q05022	RRP5_YEAST	0.28
Q06697	CDC73_YEAST	0.31
P36066	MGR3L_YEAST	-0.51
P25642	IMG2_YEAST	-0.38
Q12003	ENV7_YEAST	0.06
Q12045	VIK1_YEAST	2.31
Q06156	CND1_YEAST	0.02
P20484	MAK11_YEAST	-0.3
P38811	TRA1_YEAST	0.54
P07702	LYS2_YEAST	1.32
P34232	MTR2_YEAST	1.43
P53885	MDG1_YEAST	1.1
Q12263	GIN4_YEAST	1.32
P43552	YFF1_YEAST	0.12
P48360	ADRO_YEAST	1.12
P22543	VPS34_YEAST	0.57
P20840	SAG1_YEAST	1.12
Q07845	GRC3_YEAST	-0.11
P53011	SEH1_YEAST	0.4
Q12186	BBP_YEAST	2.76
P12630	BAR1_YEAST	1.46
P53549	PRS10_YEAST	0.28
P09368	PUT1_YEAST	0.05
P25515	VATL1_YEAST	-0.97
Q04172	SHE9_YEAST	0.19
P38630	RFC1_YEAST	1.24
P17121	SAC7_YEAST	1.79
Q12012	YO289_YEAST	-0.34
P43538	YFG6_YEAST	0.37
P33891	TIP20_YEAST	-0.1
Q04839	GFD1_YEAST	-1.35
Q12157	APC11_YEAST	1.75
Q04410	GRH1_YEAST	0.33
Q08268	MCH4_YEAST	-0.5
Q04195	SIZ1_YEAST	2.91
P47064	AP3S_YEAST	-2.37
P39996	GTT3_YEAST	1.06
Q04922	MFB1_YEAST	0.81
P36135	UTH1_YEAST	2.82
Q03178	PIR1_YEAST	1.25
Q08018	YL076_YEAST	-1.45
P26798	INO2_YEAST	1.87
P38832	ANS1_YEAST	-0.27
P54000	SUB1_YEAST	1.64
P36022	DYHC_YEAST	0.94
P32844	SEC6_YEAST	-0.11
P10849	MTF2_YEAST	-0.78
P38768	PIH1_YEAST	-0.37
P00815	HIS2_YEAST	1.02
Q03213	HOT1_YEAST	2.04
Q06563	SYM1_YEAST	-1.72
P38886	RPN10_YEAST	2.95
A0A023PXH4	YA026_YEAST	-3.12
P47042	IKS1_YEAST	1.06
P43594	MIC19_YEAST	-0.98
P18634	ART10_YEAST	0.7
P17157	PHO85_YEAST	-0.2
P31386	ATS1_YEAST	2.45
P16892	FUS3_YEAST	-0.79
Q12298	YD061_YEAST	0.89
P00546	CDK1_YEAST	-0.21
Q12429	DPH6_YEAST	0.11
Q92325	LAG2_YEAST	0.45
P38344	REI1_YEAST	1.18
P23644	TOM40_YEAST	-0.44
P51401	RL9B_YEAST	-1.15
P03962	PYRF_YEAST	0.67
P06777	RAD1_YEAST	0.13
Q06567	MCP2_YEAST	0.18
P36138	YK25_YEAST	0.86
P0CX36	RS4B_YEAST	-0.83
P30777	GPI10_YEAST	-0.09
P43569	CAF16_YEAST	0.25
P40441	HXT12_YEAST	0.5
P14905	CBS2_YEAST	-0.87
Q08562	ULS1_YEAST	0.76
P53622	COPA_YEAST	1.32
P38430	YM8C_YEAST	3.22
Q02888	INA17_YEAST	-1.99
P53171	GEP7_YEAST	-1.02
Q05583	CIAO1_YEAST	0.05
Q12165	ATPD_YEAST	0.02
P28000	RPAC2_YEAST	-0.07
P41544	SYS1_YEAST	-2.72
P24869	CG22_YEAST	-0.15
Q12028	AP1G1_YEAST	-0.77
P43609	RSC8_YEAST	1.11
P38112	MAK5_YEAST	-0.02
P34160	NCBP1_YEAST	0.58
P38774	DOG1_YEAST	-0.11
P40169	YNT4_YEAST	1.41
P32385	RNP1_YEAST	0.84
P27514	PHO91_YEAST	1.8
P36103	YKC3_YEAST	0.12
P12687	RM02_YEAST	0.44
Q06053	DUS3_YEAST	0.59
P36102	PAN3_YEAST	2.15
P0CX39	RS8A_YEAST	-1.37
P32457	CDC3_YEAST	0.77
P40580	BZRD_YEAST	-0.05
P40447	NIT1_YEAST	-0.26
P25601	YCH5_YEAST	1.34
P38837	NSG1_YEAST	0.2
P53278	YG3A_YEAST	1.93
Q12262	MCM16_YEAST	-0.18
P15380	PUT4_YEAST	1.23
Q08920	NCBP2_YEAST	3.48
Q03036	IRC4_YEAST	-1.09
P38826	ORC6_YEAST	0.81
P40074	AVT6_YEAST	-0.02
P46990	RL17B_YEAST	-0.99
P17709	HXKG_YEAST	0.51
Q12160	YP063_YEAST	-1.31
Q06671	ATG23_YEAST	0.54
P38122	PANB_YEAST	0.44
P38991	IPL1_YEAST	-0.05
P31379	LDS1_YEAST	-0.17
P25366	OCA4_YEAST	-0.03
P22211	NPR1_YEAST	3.23
P23594	PP2A1_YEAST	0.38
Q06813	YP078_YEAST	0.37
Q3E7X8	YE077_YEAST	2.24
Q06163	TERT_YEAST	-0.02
P38144	ISW1_YEAST	0.44
P32842	VATL2_YEAST	-0.23
P89888	YE075_YEAST	0.34
P38079	YRO2_YEAST	-0.63
Q08484	GYP1_YEAST	2.29
P53109	AIM14_YEAST	-0.02
P31374	PSK1_YEAST	0.95
P38199	HEK2_YEAST	1.77
P53303	ZPR1_YEAST	0.81
P32383	PLC1_YEAST	0.62
P32351	IMPX_YEAST	-0.27
Q08206	YO036_YEAST	1.39
P18898	PGTB1_YEAST	0.64
Q01163	RT23_YEAST	0.44
P19524	MYO2_YEAST	1.28
P39980	SIT1_YEAST	-0.23
P08417	FUMH_YEAST	0.86
P32325	DBF4_YEAST	0.43
P21734	UBC1_YEAST	0.23
P38920	MLH1_YEAST	-0.65
P34167	IF4B_YEAST	2.87
P40986	CDC1_YEAST	0.92
P40164	PP4R3_YEAST	1.36
Q06411	SP382_YEAST	-0.1
P42840	YN60_YEAST	-0.37
P33420	NIP80_YEAST	0.46
P36517	RM04_YEAST	0.1
P33334	PRP8_YEAST	2.59
Q01802	AATM_YEAST	-0.14
Q03322	TLG1_YEAST	-0.73
P26637	SYLC_YEAST	2.12
Q03236	YM49_YEAST	-0.42
P48016	ATH1_YEAST	1.85
P40013	BIM1_YEAST	1.73
P50861	RIB4_YEAST	-1.43
P38921	PET8_YEAST	0.98
P34164	SIP2_YEAST	1.35
P38083	YBR3_YEAST	-0.3
P0CX46	RL2B_YEAST	0.2
Q12348	CSN10_YEAST	-0.48
P36040	POC2_YEAST	-1.26
P12383	PDR1_YEAST	3.11
P36130	CAF4_YEAST	0.87
P43556	RGD2_YEAST	0.38
P40260	MEP1_YEAST	0.83
Q04773	YMW4_YEAST	0
Q04089	DOT1_YEAST	1.36
Q03264	NGL2_YEAST	1.07
P53952	YNF0_YEAST	-1.24
Q12522	IF6_YEAST	0.29
P38110	ATM_YEAST	0.27
P17122	SPO16_YEAST	-0.78
P47170	IML1_YEAST	0.91
Q06628	ATG13_YEAST	4.64
P53269	YG31_YEAST	0.53
P36145	T2EB_YEAST	-0.58
P53389	HOL1_YEAST	0.32
P16387	ODPA_YEAST	1.19
P43613	ERJ5_YEAST	-0.38
Q05567	SGPL_YEAST	1.18
Q12031	ACEB_YEAST	0.13
P40006	IRC22_YEAST	0.41
Q00416	SEN1_YEAST	3.05
P37298	DHSD_YEAST	-0.23
Q03220	CTL1_YEAST	0.31
Q03786	GNTK_YEAST	0.48
P53863	JJJ1_YEAST	0.52
P18888	SNF6_YEAST	0.59
P38210	LDB7_YEAST	-1.1
P48566	GYP3_YEAST	1.12
P33421	SDH3_YEAST	-1.3
P14693	SAM35_YEAST	-0.42
O13569	YPR36_YEAST	0.27
P15424	MS116_YEAST	2.71
Q12256	TPO4_YEAST	1.5
Q02770	CWC27_YEAST	-0.15
P53125	ITC1_YEAST	0.9
P0CY08	MTAL2_YEAST	-0.79
P52867	PMT5_YEAST	-0.35
P0CL39	YL67C_YEAST	0.28
Q06525	URN1_YEAST	1.39
P36149	BET3_YEAST	-0.94
P32323	AGA1_YEAST	3.54
Q12325	SUL2_YEAST	0.48
P38707	SYNC_YEAST	2.23
P32327	PYC2_YEAST	1.3
P47103	CYP7_YEAST	0.91
P40491	FMC1_YEAST	-1.98
P40494	PRK1_YEAST	2.31
P25293	NAP1_YEAST	1.92
P40347	PPAL_YEAST	-0.41
P28239	IPYR2_YEAST	0.54
P0CX38	RS6B_YEAST	0.84
Q06408	ARO10_YEAST	0.06
Q03016	GIP3_YEAST	2.04
Q12223	RAD59_YEAST	-0.11
P25567	SRO9_YEAST	1.77
Q06678	RM35_YEAST	-0.14
P14242	PMS1_YEAST	0.96
P36173	GEX2_YEAST	-0.08
P38778	SMF2_YEAST	0.37
P48564	MRX6_YEAST	0.9
Q03868	SPO71_YEAST	1.31
P38766	RRM3_YEAST	1.1
P34221	PP2C3_YEAST	1.27
P54784	ORC1_YEAST	0.56
P54005	DIA1_YEAST	-0.31
P06738	PHSG_YEAST	1.04
P18562	UPP_YEAST	1.34
Q12424	YD206_YEAST	0.26
Q12454	OCA6_YEAST	0.18
P15873	PCNA_YEAST	-0.52
P38810	SFB3_YEAST	1.14
P47145	YJ77_YEAST	0.42
Q03327	UGO1_YEAST	2.3
P53062	BRR6_YEAST	-0.83
P06700	SIR2_YEAST	0.42
P39943	MIG3_YEAST	0.68
P50947	PHO23_YEAST	1.92
P25491	MAS5_YEAST	2.85
P25335	ALLC_YEAST	0.22
Q12057	PIN2_YEAST	5.06
P29509	TRXB1_YEAST	1.79
P53836	CA120_YEAST	4.36
P39994	YEC0_YEAST	0.66
Q00764	TPS1_YEAST	-0.59
P42884	AAD14_YEAST	-0.22
P12611	WHI2_YEAST	-0.24
Q12245	POC4_YEAST	-0.5
P38239	YBR2_YEAST	-0.74
P08431	GAL7_YEAST	0.04
P40497	YIJ2_YEAST	0.88
P38772	BCD1_YEAST	-1.32
P19736	PRP9_YEAST	0.11
P33312	RIB7_YEAST	-0.37
Q12373	HIF1_YEAST	1.36
P53685	HST1_YEAST	0.17
P40549	MNT3_YEAST	0.45
P38156	MAL31_YEAST	0.4
Q12207	NCE2_YEAST	0.89
Q04368	CSI1_YEAST	-1.29
P29589	AHT1_YEAST	2.53
P46943	GUF1_YEAST	-0.03
P26570	PPZ1_YEAST	2.17
Q12046	CWC2_YEAST	0.58
Q12428	PRPD_YEAST	0.1
P38848	PEX28_YEAST	1.49
P40480	HOS4_YEAST	1.34
P39932	STL1_YEAST	0.79
P53747	YN8Z_YEAST	-0.86
Q02776	TIM50_YEAST	0.31
Q08693	TRE2_YEAST	1.18
Q06616	YP174_YEAST	0.86
P27692	SPT5_YEAST	10.61
P06244	KAPA_YEAST	0.4
Q02805	ROD1_YEAST	1.1
Q12086	DIN7_YEAST	-0.69
P42938	TDA10_YEAST	-0.15
P43549	YFF4_YEAST	1.42
Q04409	EMI2_YEAST	1.06
P00572	KTHY_YEAST	-0.82
P07170	KAD2_YEAST	-0.41
P38821	DNPEP_YEAST	0.05
Q12270	RBD2_YEAST	-0.72
P0CL30	YNL39_YEAST	6.1
P33203	PRP40_YEAST	0.43
P32630	UTR5_YEAST	-0.37
P36080	RRP14_YEAST	1.28
P10080	SSBP1_YEAST	5.02
P15303	SEC23_YEAST	1.46
Q03973	HMO1_YEAST	-0.15
P39535	PHO90_YEAST	0.36
P25344	STE50_YEAST	1.59
P38776	YHK8_YEAST	0.48
Q08422	TMC1_YEAST	0.63
P53933	APP1_YEAST	1.23
P40323	YP073_YEAST	-0.3
P07236	SYTM_YEAST	0.3
P46972	IMP2_YEAST	0.75
P05739	RL6B_YEAST	0.15
P38757	NEM1_YEAST	0.05
Q03529	SCS7_YEAST	-0.78
P32567	PAH1_YEAST	0.8
P12695	ODP2_YEAST	0.43
Q12368	SNU23_YEAST	-1.2
Q03193	YD090_YEAST	-0.56
P53322	TNA1_YEAST	-0.28
P40898	YJV1_YEAST	0.32
P53886	APC1_YEAST	1.45
P36085	STB6_YEAST	0.82
P47165	XPT1_YEAST	-1.16
P38816	TRXB2_YEAST	1.14
P43614	KEG1_YEAST	-2.24
P41930	SSU1_YEAST	-1.21
P22135	ATP12_YEAST	-0.41
P50107	LGUL_YEAST	1.68
Q12345	IES3_YEAST	-0.33
Q08645	FOLE_YEAST	-0.37
Q03782	SNU56_YEAST	1.16
P06106	CYSD_YEAST	1.11
Q08910	YO387_YEAST	0.47
Q06490	THI22_YEAST	0.62
P51996	YPT32_YEAST	-0.38
Q05672	RBS1_YEAST	4.35
P36527	RM28_YEAST	-0.08
P39692	MET10_YEAST	0.66
P25371	ADP1_YEAST	3.55
P39106	MNN1_YEAST	0.07
Q99258	RIB3_YEAST	-0.19
P53283	TPO2_YEAST	1
Q04847	ROY1_YEAST	0.27
P53911	EAF7_YEAST	-0.07
P33200	PDR3_YEAST	-0.2
P34730	BMH2_YEAST	-0.44
P38819	ERP5_YEAST	-0.43
P32489	MEI5_YEAST	-0.34
P27654	TIP1_YEAST	0.35
Q06704	IMH1_YEAST	-0.04
P05738	RL9A_YEAST	-1.32
P10614	CP51_YEAST	0.94
Q05518	PAL1_YEAST	1.9
P35203	CBF3C_YEAST	-0.58
P53691	PPID_YEAST	0.53
P40085	TAPT1_YEAST	-0.27
P52893	ALAM_YEAST	0.31
P35169	TOR1_YEAST	0.73
P33757	SPO23_YEAST	0.16
P32787	MG101_YEAST	0.83
P32588	PUB1_YEAST	2.94
P33751	PAD1_YEAST	0.18
P40328	TBP6_YEAST	1.36
P54003	SUR7_YEAST	0.63
P36010	NDK_YEAST	0.7
Q06705	CSR1_YEAST	-1.22
P27801	PEP3_YEAST	-0.76
P38829	YHS2_YEAST	-0.97
Q01649	CIK1_YEAST	0.28
Q05867	YL283_YEAST	-0.11
P53183	YGD9_YEAST	-0.78
P53727	BUD17_YEAST	0.11
P47030	TAX4_YEAST	1.19
P38693	PPAC_YEAST	1.2
Q02648	TRM44_YEAST	0.97
Q04545	TDA9_YEAST	2.64
Q04411	URC2_YEAST	0.58
Q06164	MMS22_YEAST	0.63
P37296	STV1_YEAST	0.26
P33302	PDR5_YEAST	0.77
P0CX76	YM12A_YEAST	4.17
Q08157	YOL19_YEAST	2.09
P40157	VID27_YEAST	0.51
P54074	ASI1_YEAST	0.25
Q12292	ATG34_YEAST	0.65
P43595	DCV1_YEAST	0.15
P25379	STDH_YEAST	-0.5
P40577	MND2_YEAST	0.3
P14306	CPYI_YEAST	0.97
P38780	YHL4_YEAST	-0.63
P38795	NADE_YEAST	-0.18
P07278	KAPR_YEAST	1.67
P38227	QDR3_YEAST	1.2
P38929	ATC2_YEAST	0.15
P38282	SP381_YEAST	2.12
P48569	YD183_YEAST	-1.05
P53054	YGZG_YEAST	0.94
P28742	KIP1_YEAST	1.05
P40099	FTHC_YEAST	-0.5
P38995	ATU2_YEAST	1.2
P53936	YNI9_YEAST	-0.88
P03879	MBI4_YEAST	-0.59
P0CW40	MALX2_YEAST	0.19
P36014	GPX1_YEAST	-1.44
Q12490	YB11B_YEAST	2.51
P51534	SHE4_YEAST	-0.46
P0CL42	YI177_YEAST	-0.29
Q06511	RRP15_YEAST	-0.77
P40072	SLX8_YEAST	0.94
P49573	CTR1_YEAST	2.07
P32775	GLGB_YEAST	0.86
P37370	VRP1_YEAST	3.24
P14126	RL3_YEAST	-0.08
P47104	RAV1_YEAST	1.13
P46675	STU2_YEAST	0.38
P40464	FLX1_YEAST	-0.16
P37302	APE3_YEAST	0.08
P38928	AXL2_YEAST	0.87
Q12462	PEX11_YEAST	-2.02
P38169	KMO_YEAST	-0.45
P48525	SYEM_YEAST	0.11
P0CL38	YL66C_YEAST	0.28
P53236	RSC1_YEAST	0.8
P25375	PRTD_YEAST	1.61
P38851	LAM1_YEAST	0.63
Q12188	REC8_YEAST	1.03
P36152	DRE2_YEAST	-0.11
P27705	MIG1_YEAST	0.92
P40498	UTP25_YEAST	0.09
P0C2J5	YL22B_YEAST	1.1
Q12202	OSW2_YEAST	0.68
P39723	SPC72_YEAST	1.71
P19882	HSP60_YEAST	0.59
P38888	MNL1_YEAST	0.11
P18480	SNF5_YEAST	3.35
Q03667	MIX17_YEAST	0.85
P32831	NGR1_YEAST	3.36
P40438	VTH1_YEAST	0.98
P47144	ECM27_YEAST	1.15
P36101	TCD2_YEAST	-0.23
P22438	SYMM_YEAST	0.35
Q99190	TECR_YEAST	-0.95
P07258	CARA_YEAST	-0.01
P33323	RE104_YEAST	-0.88
P32618	YEF3_YEAST	1.76
Q03691	ROT1_YEAST	0.84
P40492	FYV10_YEAST	-0.24
P47076	RPC9_YEAST	-1.9
P33304	AFR1_YEAST	0.87
P16649	TUP1_YEAST	1.72
P40483	YIK8_YEAST	1.59
Q12469	SKM1_YEAST	-0.47
Q12220	UTP12_YEAST	0.93
P21957	OPI1_YEAST	1.57
Q06834	ASR1_YEAST	-0.53
P13711	ACOX_YEAST	0.6
P40008	FMP52_YEAST	0.21
P40442	YIQ9_YEAST	2.64
P53255	DRN1_YEAST	-0.08
P33298	PRS6B_YEAST	-0.61
P32266	MGM1_YEAST	0.33
P53845	YIF1_YEAST	3.91
P53868	ALG9_YEAST	0.39
P38318	YB70_YEAST	0.67
P40078	NSA2_YEAST	-0.09
P32837	UGA4_YEAST	0.33
Q12216	SIZ2_YEAST	1.42
P52923	AIF1_YEAST	0.49
P50111	ZDS1_YEAST	2.98
Q06815	MRL1_YEAST	-0.21
P46989	ATG27_YEAST	-0.18
P32330	DGR2_YEAST	2.01
P53294	PUS6_YEAST	-0.22
P10664	RL4A_YEAST	2.09
P32379	PSA5_YEAST	-0.82
P33417	IXR1_YEAST	2.81
Q07821	ISA1_YEAST	2.16
P28834	IDH1_YEAST	0.05
P40517	YRB2_YEAST	0.61
P38882	UTP9_YEAST	0.55
Q06168	SFH1_YEAST	0.41
Q12403	ERP3_YEAST	0
P0C5B8	YH050_YEAST	0.55
P28795	PEX3_YEAST	-0.87
Q06821	YP084_YEAST	-0.07
Q02486	ABF2_YEAST	-0.7
P32453	ATP11_YEAST	-0.83
P36068	SHE2_YEAST	-1.3
Q12480	ETFA_YEAST	0.49
P33894	STE13_YEAST	1.48
P38756	TCD1_YEAST	-1.06
P47111	VPS55_YEAST	-0.26
P38785	GIC1_YEAST	0.94
Q03824	INP2_YEAST	0.21
P52286	SKP1_YEAST	-0.5
P18851	GBB_YEAST	0.84
P42951	LSB6_YEAST	1.58
P40359	PSF2_YEAST	0.62
P39927	PTI1_YEAST	1.74
P46654	RSSA2_YEAST	-0.5
Q08108	PLB3_YEAST	1.57
P42842	EMW1_YEAST	0.62
Q12390	GST2_YEAST	-1.13
P36519	RM07_YEAST	0.59
P50101	UBP15_YEAST	1.21
Q06216	PIG1_YEAST	0.64
P47061	VPS53_YEAST	-0.09
P53946	ARP5_YEAST	0.54
P25555	GBP2_YEAST	6.75
P24867	PCL1_YEAST	0.1
Q12209	FRE8_YEAST	0.1
Q12214	HOS1_YEAST	0.36
P32797	CDC13_YEAST	0.69
P53256	RRP46_YEAST	-1.13
Q07794	RT109_YEAST	-0.11
Q04223	YM14_YEAST	-0.79
P39956	RPH1_YEAST	1.12
Q04371	ARMT1_YEAST	-0.09
P32319	VPS10_YEAST	1.24
Q12745	SEC39_YEAST	-0.79
P36075	CUE2_YEAST	0
Q00711	SDHA_YEAST	0.71
P0CX51	RS16A_YEAST	-0.12
Q01590	SED5_YEAST	-0.02
P25377	ADH7_YEAST	1.53
Q05040	FAR8_YEAST	0.33
P52892	ALAT_YEAST	0.79
P33333	PLSC_YEAST	-0.45
Q06685	VIP1_YEAST	0.89
P38290	UBS1_YEAST	0.61
P36520	RM10_YEAST	0.29
P40499	ICE2_YEAST	0.29
Q06324	MMR1_YEAST	1.36
P48561	TRF5_YEAST	1.26
P16451	ODPX_YEAST	0.22
P49017	COQ5_YEAST	0.85
P39729	RBG1_YEAST	0.16
P40103	YE18_YEAST	3.08
Q12510	CMR1_YEAST	0.31
P34227	PRX1_YEAST	0.88
Q06505	IWS1_YEAST	1.25
P26784	RL16A_YEAST	-0.43
P39006	PSD1_YEAST	-0.23
Q08187	YO029_YEAST	1.13
Q08977	YP260_YEAST	0.22
P32521	PAN1_YEAST	4.28
P47818	CCC1_YEAST	2.09
P53155	YGI2_YEAST	0.6
Q12017	PLP2_YEAST	-0.37
P33122	TYE7_YEAST	-0.1
P25039	EFGM_YEAST	0.76
Q12479	IRC11_YEAST	0.66
P38992	SUR2_YEAST	0.24
Q04969	SPC2_YEAST	-1.54
Q99359	RAD61_YEAST	0.53
Q08907	FIT3_YEAST	1.21
Q03833	GIS1_YEAST	3.67
P36165	TGL4_YEAST	0.39
Q12040	YO283_YEAST	-1.3
P87274	YD526_YEAST	0.29
P13186	KIN2_YEAST	1.95
P50079	HSV2_YEAST	0.59
P14908	MTF1_YEAST	-0.4
Q06410	ATG17_YEAST	-1.47
Q12063	UPPS_YEAST	0.23
P32334	MSB2_YEAST	3.77
P53145	LSG1_YEAST	0.84
P53146	USE1_YEAST	-0.58
Q12377	RPN6_YEAST	0.09
P32598	PP12_YEAST	0.19
P17064	FCY2_YEAST	0.44
Q05123	ARP9_YEAST	0.97
P36118	NTR2_YEAST	-0.83
P53176	MST27_YEAST	-1.64
P40528	SYG1_YEAST	1.02
P39925	AFG3_YEAST	0.65
P50108	MNN10_YEAST	1.86
P32945	PPQ1_YEAST	2.17
P53927	NOP15_YEAST	-0.7
Q04728	ARGJ_YEAST	-0.11
P25611	RDS1_YEAST	0.75
P02406	RL28_YEAST	-0.4
P38334	TRS20_YEAST	1.06
P53832	WSC2_YEAST	2.33
P0CX13	COS3_YEAST	-0.71
Q03885	YI017_YEAST	-0.59
P53541	SPO1_YEAST	1.39
P47988	TEA1_YEAST	1.99
P53736	YN8O_YEAST	-0.24
Q04377	LCD1_YEAST	2.15
P24521	ERG8_YEAST	0.23
P30775	RF1M_YEAST	0.38
P47160	ENT3_YEAST	2.31
P53292	RT35_YEAST	0.37
P52489	KPYK2_YEAST	0.17
P47068	BBC1_YEAST	2.08
P38842	YHU0_YEAST	-1.62
P43617	YFL5_YEAST	-0.75
Q01477	UBP3_YEAST	2.92
Q04083	THI74_YEAST	-1.1
P25571	YCE1_YEAST	-1.17
Q06200	ECM7_YEAST	0.78
P24871	CG24_YEAST	-1.4
Q12282	YO214_YEAST	0.6
Q06109	RRG8_YEAST	-0.41
P38691	KSP1_YEAST	2.7
P25354	YCP7_YEAST	-0.85
Q08919	TRE1_YEAST	-0.16
P53756	PDR18_YEAST	1.58
P40339	RFC4_YEAST	-0.36
P40325	HUA1_YEAST	2.04
P39969	BOI2_YEAST	5.04
P32343	SSH4_YEAST	1.17
P06704	CDC31_YEAST	-1.17
P43619	NADC_YEAST	0.49
Q12001	ALG6_YEAST	-0.23
P32892	DRS1_YEAST	1.79
Q12092	ATG29_YEAST	-0.78
P47054	NU192_YEAST	0.53
P40188	RGI2_YEAST	-0.14
Q08240	YO099_YEAST	-0.34
Q02767	VPS28_YEAST	-1.25
P38089	PP2C4_YEAST	1.03
P00950	PMG1_YEAST	0.1
P47976	CTH1_YEAST	1.74
P0CF17	U5072_YEAST	-0.54
P40955	CHS6_YEAST	1.01
P47175	HMS2_YEAST	-0.58
P26783	RS5_YEAST	-0.7
Q12391	YN11A_YEAST	3.76
P53107	YRB30_YEAST	0.26
P33307	CSE1_YEAST	-0.79
P53230	TAM41_YEAST	0.87
Q12021	RAD28_YEAST	0.52
Q08234	YO075_YEAST	0.92
P53306	GPI1_YEAST	-0.49
P0CL36	YNL33_YEAST	0.62
P0CX65	YD14A_YEAST	3.99
Q12222	YGK3_YEAST	0.49
P35056	PEX5_YEAST	1.68
P53751	YN94_YEAST	1.15
P40500	YII9_YEAST	-1.27
Q12134	HUA2_YEAST	-0.12
Q12466	TCB1_YEAST	0.55
P30771	NAM7_YEAST	1.34
P25654	YCY0_YEAST	-1.07
P0CX75	YL13A_YEAST	4.17
P40572	YIT6_YEAST	0.63
P53313	SDA1_YEAST	0.59
P53378	TBG_YEAST	1.33
P0CF34	YL016_YEAST	0.4
Q03941	CAB5_YEAST	-1.32
P48015	GCST_YEAST	-0.36
P53280	CF130_YEAST	1.55
P07248	ADR1_YEAST	0.82
P47150	RT07_YEAST	-0.84
P39112	DSS1_YEAST	0.59
P13586	ATC1_YEAST	0.32
P53972	RCM1_YEAST	0.78
Q08003	RFU1_YEAST	-0.47
O13547	CCW14_YEAST	1.28
Q07807	PUF3_YEAST	2.84
Q12336	YL059_YEAST	-0.98
P47176	BCA2_YEAST	0.62
P40002	MIT1_YEAST	3.17
P31244	RAD16_YEAST	0.28
Q06708	VAC14_YEAST	-0.37
P53947	YNF8_YEAST	-0.05
P32807	KU70_YEAST	0.21
P47172	YJ9I_YEAST	-1.03
Q12129	NMD4_YEAST	-1.07
P38719	DBP8_YEAST	0.15
Q03957	CTK1_YEAST	2.84
P53096	HOS2_YEAST	0.31
P07266	MRS1_YEAST	0.3
P0CX62	YG22A_YEAST	0.8
P25596	GEX1_YEAST	-0.07
P53073	EMC4_YEAST	-0.13
P05755	RS9B_YEAST	0.58
P15992	HSP26_YEAST	1.32
P38207	APN2_YEAST	0.71
P47123	MOG1_YEAST	-1.02
P38268	YBW6_YEAST	-0.71
Q07534	S2538_YEAST	-0.84
Q06147	LCB5_YEAST	0.92
Q12344	GYP5_YEAST	1.11
P53912	YNN4_YEAST	0.5
P26263	PDC6_YEAST	-0.29
Q08923	CTI6_YEAST	2.13
P38845	CRP1_YEAST	1.03
P47134	BIR1_YEAST	0.42
P43634	CHA4_YEAST	0.18
Q6Q595	SCS22_YEAST	-0.31
Q08963	RU2A_YEAST	0.07
Q04434	YD535_YEAST	-0.69
P30606	ITR2_YEAST	0.42
P53723	YN8B_YEAST	-0.49
Q12164	POM33_YEAST	-1.62
P25356	BPH1_YEAST	0.09
Q07381	TSR1_YEAST	1.4
P38777	FSH1_YEAST	-0.61
Q08361	AAD15_YEAST	-0.15
Q04199	CAC2_YEAST	0.56
P24482	DPB2_YEAST	0.77
P46678	TFC5_YEAST	1.23
P10863	TIR1_YEAST	0.05
P40475	QDR1_YEAST	-0.43
P53741	BRE5_YEAST	0.1
Q04225	RRB1_YEAST	0.67
P35728	MPE1_YEAST	3.44
Q06245	SEC10_YEAST	0.71
P41912	ERFD_YEAST	0.3
P32458	CDC11_YEAST	0.6
P53032	SUT1_YEAST	0.73
P36090	ANR2_YEAST	-0.52
P49957	TRM9_YEAST	0.83
Q12455	SPSY_YEAST	-1.03
Q12113	YO21B_YEAST	1.18
P14843	AROF_YEAST	-0.63
P53199	ERG26_YEAST	-0.61
Q12407	YD199_YEAST	0.93
Q02775	SLU7_YEAST	-0.45
P22579	SIN3_YEAST	2.27
P43588	RPN11_YEAST	-1.23
P38987	TEM1_YEAST	-0.44
P48743	RFX1_YEAST	3.3
P0CX61	YF21A_YEAST	0.8
A0A023PZI9	YH182_YEAST	-1.73
P38295	MCFS2_YEAST	0.34
P32643	TMT1_YEAST	1.17
Q04659	CSM3_YEAST	1.36
P48164	RS7B_YEAST	-0.26
Q12406	ARP7_YEAST	1.61
P0C0W9	RL11A_YEAST	1.46
P40963	SAS2_YEAST	-0.16
P53744	BIO5_YEAST	0.38
Q03210	NGL3_YEAST	1.58
P38833	YHS7_YEAST	0.58
P15367	SEC11_YEAST	-1.5
P53012	SCS3_YEAST	0.3
P43603	LSB3_YEAST	7.67
Q08280	BSC6_YEAST	-0.53
P10081	IF4A_YEAST	-0.22
P32801	ELM1_YEAST	0.23
Q07379	YD057_YEAST	0.23
P33310	MDL1_YEAST	0.38
P21242	PSA7_YEAST	-0.08
Q05958	ECM22_YEAST	2.57
Q05789	ATG38_YEAST	-0.97
P46991	YJR5_YEAST	-0.54
P53960	YNE0_YEAST	0.36
P35180	TOM20_YEAST	-1.08
P50105	TAF4_YEAST	2.43
P39726	GCSH_YEAST	-0.38
Q12363	WTM1_YEAST	1.2
P32641	RAD24_YEAST	0.83
P53330	RT102_YEAST	-0.72
Q04066	KFA_YEAST	-0.27
P38170	CND2_YEAST	1.7
P00163	CYB_YEAST	-0.6
P38237	UBP14_YEAST	1.73
P31412	VATC_YEAST	0.29
P36133	YK20_YEAST	-1.41
P41546	HAC1_YEAST	0.95
P40457	MLP2_YEAST	0.42
P38075	PDX3_YEAST	-0.75
P36099	YKD0_YEAST	-0.91
Q12289	CRC1_YEAST	0.37
P40893	REE1_YEAST	0.9
Q05670	FUS2_YEAST	0.48
Q03778	RIFK_YEAST	0.14
Q92393	YO12B_YEAST	3.98
P53598	SUCA_YEAST	-0.24
P36119	YK03_YEAST	0.15
P40892	YJV8_YEAST	-1.03
P32448	ASF2_YEAST	-0.23
P41277	GPP1_YEAST	0.47
P40025	PHM8_YEAST	0.07
Q03281	HEH2_YEAST	0.47
Q03280	TOM1_YEAST	1.5
P25358	ELO2_YEAST	-0.56
P22855	MAN1_YEAST	1.5
P38859	DNA2_YEAST	1.13
Q06819	DIB1_YEAST	-1.26
P32487	LYP1_YEAST	0.25
P38758	TDA3_YEAST	0.77
P47011	GLG2_YEAST	-0.05
Q04364	YMP8_YEAST	1.36
P53969	SAM50_YEAST	0.53
Q06170	YL326_YEAST	0.52
P38260	FES1_YEAST	-0.58
Q12035	FCF2_YEAST	-0.83
P32610	VATD_YEAST	-1.1
P0CI66	YAN2_YEAST	0.93
Q05015	FSH2_YEAST	0.09
P32611	RML2_YEAST	1.67
P25350	YCP6_YEAST	-1.01
P19097	FAS2_YEAST	1.39
Q02804	ARL3_YEAST	-1.01
P36037	DOA1_YEAST	-0.35
Q08650	DGAT2_YEAST	1.01
P39732	GIP4_YEAST	0.33
P19881	PNPP_YEAST	0.33
P23285	CYPB_YEAST	1.45
P16603	NCPR_YEAST	0.94
Q03774	TRM82_YEAST	-0.82
P06787	CALM_YEAST	-2.36
P38800	LAM4_YEAST	1.72
Q02721	TO6BL_YEAST	-0.76
P53179	PALF_YEAST	0.3
Q8TGN6	YH137_YEAST	0.93
P43537	YFG7_YEAST	3.67
Q00245	RHO3_YEAST	-0.7
P53822	COS1_YEAST	-0.79
P04802	SYDC_YEAST	1.73
P0CL40	YOR96_YEAST	0.28
P0CX99	YFG8_YEAST	0.59
P22768	ASSY_YEAST	-0.56
Q03776	PRP42_YEAST	-0.94
P19454	CSK22_YEAST	-0.9
P38289	EXO5_YEAST	1.41
Q03151	MTG1_YEAST	-0.46
Q12500	AVL9_YEAST	5.13
P53074	YGY0_YEAST	-2.1
P53861	ELOA1_YEAST	2.32
P47140	AIM25_YEAST	-0.86
P53124	PCL10_YEAST	0.29
P25621	FEN2_YEAST	-0.1
P47173	YJ9J_YEAST	-0.41
P38285	AMN1_YEAST	-0.08
P41835	THI6_YEAST	0.13
P41816	OYE3_YEAST	0.15
Q03976	RT24_YEAST	-0.15
P53037	PSD2_YEAST	1.8
P39012	GAA1_YEAST	-0.31
Q12440	APC2_YEAST	-0.48
P53078	SDT1_YEAST	-1.17
[truncated: 3,460 more rows]

## Sheet: HUMAN(DISPROT)
UID	Uniprot Name	PScore	Protein Name
P04818	TYSY_HUMAN	0.45	Thymidylate synthase
P47813	IF1AX_HUMAN	0.18	Eukaryotic translation initiation factor 1A, X-
Q9H832	UBE2Z_HUMAN	0.98	Ubiquitin-conjugating enzyme E2 Z
O75496	GEMI_HUMAN	1.1	Geminin
P02788	TRFL_HUMAN	1.31	Lactotransferrin
P20963	CD3Z_HUMAN	-1.35	T-cell surface glycoprotein CD3 zeta chain
P05121	PAI1_HUMAN	0.76	Plasminogen activator inhibitor 1
Q92731	ESR2_HUMAN	2.43	Estrogen receptor beta
P39900	MMP12_HUMAN	2.01	Macrophage metalloelastase
P09132	SRP19_HUMAN	-1.96	Signal recognition particle 19 kDa protein
P01730	CD4_HUMAN	-0.53	T-cell surface glycoprotein CD4
P52179	MYOM1_HUMAN	1.13	Myomesin-1
P15884	ITF2_HUMAN	5.77	Transcription factor 4
P78504	JAG1_HUMAN	4.84	Protein jagged-1
P35612	ADDB_HUMAN	0.77	Beta-adducin
O00204	ST2B1_HUMAN	1.32	Sulfotransferase family cytosolic 2B member 1
P24592	IBP6_HUMAN	0.99	Insulin-like growth factor-binding protein 6
O75365	TP4A3_HUMAN	-0.4	Protein tyrosine phosphatase type IVA 3
P46527	CDN1B_HUMAN	1.86	Cyclin-dependent kinase inhibitor 1B
Q12972	PP1R8_HUMAN	2.34	Nuclear inhibitor of protein phosphatase 1
P53350	PLK1_HUMAN	1.03	Serine/threonine-protein kinase PLK1
P35637	FUS_HUMAN	13.96	RNA-binding protein FUS
P54252	ATX3_HUMAN	-0.15	Ataxin-3
P25054	APC_HUMAN	3.21	Adenomatous polyposis coli protein
P30291	WEE1_HUMAN	3.74	Wee1-like protein kinase
O95405	ZFYV9_HUMAN	1.1	Zinc finger FYVE domain-containing protein 9
P0DMM9	ST1A3_HUMAN	0.54	Sulfotransferase 1A3
O14733	MP2K7_HUMAN	0.73	Dual specificity mitogen-activated protein kina
Q01844	EWS_HUMAN	9.31	RNA-binding protein EWS
Q92886	NGN1_HUMAN	2.49	Neurogenin-1
P0DN86	CGB3_HUMAN	1.39	Choriogonadotropin subunit beta 3
P11387	TOP1_HUMAN	0.71	DNA topoisomerase 1
Q13485	SMAD4_HUMAN	1.91	Mothers against decapentaplegic homolog 4
P04637	P53_HUMAN	1.99	Cellular tumor antigen p53
P21583	SCF_HUMAN	0.37	Kit ligand
Q13698	CAC1S_HUMAN	2.17	Voltage-dependent L-type calcium channel subuni
Q9Y6C2	EMIL1_HUMAN	2.57	EMILIN-1
P41236	IPP2_HUMAN	0.51	Protein phosphatase inhibitor 2
Q969F2	NKD2_HUMAN	1.78	Protein naked cuticle homolog 2
P62495	ERF1_HUMAN	-0.1	Eukaryotic peptide chain release factor subunit
P43351	RAD52_HUMAN	1.54	DNA repair protein RAD52 homolog
Q8N488	RYBP_HUMAN	1.88	RING1 and YY1-binding protein
P63098	CANB1_HUMAN	-1.4	Calcineurin subunit B type 1
Q9NVS9	PNPO_HUMAN	0.44	Pyridoxine-5'-phosphate oxidase
P11171	41_HUMAN	-0.04	Protein 4.1
P01106	MYC_HUMAN	2.14	Myc proto-oncogene protein
Q16595	FRDA_HUMAN	0.17	Frataxin, mitochondrial
Q6P3W2	DJC24_HUMAN	-0.87	DnaJ homolog subfamily C member 24
Q9UM07	PADI4_HUMAN	1.92	Protein-arginine deiminase type-4
Q9H2S9	IKZF4_HUMAN	2.5	Zinc finger protein Eos
P19793	RXRA_HUMAN	1.83	Retinoic acid receptor RXR-alpha
P49841	GSK3B_HUMAN	2.21	Glycogen synthase kinase-3 beta
P53041	PPP5_HUMAN	0.5	Serine/threonine-protein phosphatase 5
P35638	DDIT3_HUMAN	1.57	DNA damage-inducible transcript 3 protein
P38936	CDN1A_HUMAN	1.18	Cyclin-dependent kinase inhibitor 1
Q9NZ94	NLGN3_HUMAN	1.85	Neuroligin-3
P04049	RAF1_HUMAN	1.81	RAF proto-oncogene serine/threonine-protein kina
Q16665	HIF1A_HUMAN	0.95	Hypoxia-inducible factor 1-alpha
Q15517	CDSN_HUMAN	6.89	Corneodesmosin
P00736	C1R_HUMAN	2.09	Complement C1r subcomponent
Q9UBT2	SAE2_HUMAN	0.52	SUMO-activating enzyme subunit 2
P50616	TOB1_HUMAN	1.91	Protein Tob1
Q14449	GRB14_HUMAN	-0.18	Growth factor receptor-bound protein 14
P09651	ROA1_HUMAN	13.89	Heterogeneous nuclear ribonucleoprotein A1
P01112	RASH_HUMAN	-0.29	GTPase HRas
Q06787	FMR1_HUMAN	4.7	Synaptic functional regulator FMR1
Q9UGL1	KDM5B_HUMAN	1.98	Lysine-specific demethylase 5B
P23025	XPA_HUMAN	-0.66	DNA repair protein complementing XP-A cells
P37840	SYUA_HUMAN	-0.31	Alpha-synuclein
P38398	BRCA1_HUMAN	1.02	Breast cancer type 1 susceptibility protein
O15169	AXIN1_HUMAN	2.15	Axin-1
Q96T21	SEBP2_HUMAN	1.82	Selenocysteine insertion sequence-binding prote
Q16633	OBF1_HUMAN	0.67	POU domain class 2-associating factor 1
Q9UBE0	SAE1_HUMAN	-0.37	SUMO-activating enzyme subunit 1
Q13426	XRCC4_HUMAN	0.81	DNA repair protein XRCC4
P01160	ANF_HUMAN	1.14	Natriuretic peptides A
P14061	DHB1_HUMAN	0.04	Estradiol 17-beta-dehydrogenase 1
Q13569	TDG_HUMAN	2.68	G/T mismatch-specific thymine DNA glycosylase
P11233	RALA_HUMAN	-1.1	Ras-related protein Ral-A
Q04656	ATP7A_HUMAN	0.26	Copper-transporting ATPase 1
Q15382	RHEB_HUMAN	-1.5	GTP-binding protein Rheb
Q29983	MICA_HUMAN	0.78	MHC class I polypeptide-related sequence A
P78356	PI42B_HUMAN	0.57	Phosphatidylinositol 5-phosphate 4-kinase type-
O00273	DFFA_HUMAN	-0.27	DNA fragmentation factor subunit alpha
Q14722	KCAB1_HUMAN	0.47	Voltage-gated potassium channel subunit beta-1
P49918	CDN1C_HUMAN	2.23	Cyclin-dependent kinase inhibitor 1C
P20810	ICAL_HUMAN	0.94	Calpastatin
Q9NQB0	TF7L2_HUMAN	2.25	Transcription factor 7-like 2
P25963	IKBA_HUMAN	0.05	NF-kappa-B inhibitor alpha
P01100	FOS_HUMAN	2.43	Proto-oncogene c-Fos
Q09472	EP300_HUMAN	4.67	Histone acetyltransferase p300
P35869	AHR_HUMAN	2	Aryl hydrocarbon receptor
Q9HAU5	RENT2_HUMAN	2.39	Regulator of nonsense transcripts 2
P00747	PLMN_HUMAN	3.51	Plasminogen
Q07817	B2CL1_HUMAN	0.4	Bcl-2-like protein 1
P07476	INVO_HUMAN	2.18	Involucrin
P04150	GCR_HUMAN	1.59	Glucocorticoid receptor
P80723	BASP1_HUMAN	0.68	Brain acid soluble protein 1
Q8WZ42	TITIN_HUMAN	2.82	Titin
P27797	CALR_HUMAN	1.13	Calreticulin
P52298	NCBP2_HUMAN	2.35	Nuclear cap-binding protein subunit 2
P19429	TNNI3_HUMAN	-0.14	Troponin I, cardiac muscle
O15273	TELT_HUMAN	-0.05	Telethonin
P24071	FCAR_HUMAN	0.72	Immunoglobulin alpha Fc receptor
P27708	PYR1_HUMAN	1.78	CAD protein
P06132	DCUP_HUMAN	0.7	Uroporphyrinogen decarboxylase
Q9UJY5	GGA1_HUMAN	2.01	ADP-ribosylation factor-binding protein GGA1
P13569	CFTR_HUMAN	0.31	Cystic fibrosis transmembrane conductance regula
Q01101	INSM1_HUMAN	2.95	Insulinoma-associated protein 1
P10275	ANDR_HUMAN	5.2	Androgen receptor
P24522	GA45A_HUMAN	0.19	Growth arrest and DNA damage-inducible protein
Q99967	CITE2_HUMAN	4.11	Cbp/p300-interacting transactivator 2
Q16222	UAP1_HUMAN	-0.44	UDP-N-acetylhexosamine pyrophosphorylase
P14859	PO2F1_HUMAN	1.18	POU domain, class 2, transcription factor 1
P07766	CD3E_HUMAN	0.28	T-cell surface glycoprotein CD3 epsilon chain
P27695	APEX1_HUMAN	1.09	DNA-(apurinic or apyrimidinic site) lyase
P08240	SRPRA_HUMAN	1.52	Signal recognition particle receptor subunit al
P49913	CAMP_HUMAN	0.01	Cathelicidin antimicrobial peptide
Q9Y5B0	CTDP1_HUMAN	2.25	RNA polymerase II subunit A C-terminal domain p
P10415	BCL2_HUMAN	2.01	Apoptosis regulator Bcl-2
P42568	AF9_HUMAN	2.38	Protein AF-9
P16949	STMN1_HUMAN	-0.26	Stathmin
Q09161	NCBP1_HUMAN	0.43	Nuclear cap-binding protein subunit 1
Q9UER7	DAXX_HUMAN	2.21	Death domain-associated protein 6
P02458	CO2A1_HUMAN	6.28	Collagen alpha-1(II) chain
P10451	OSTP_HUMAN	1.64	Osteopontin
O15350	P73_HUMAN	2.69	Tumor protein p73
P52630	STAT2_HUMAN	0.85	Signal transducer and activator of transcriptio
O43236	SEPT4_HUMAN	1.65	Septin-4
P49354	FNTA_HUMAN	1.08	Protein farnesyltransferase/geranylgeranyltransf
Q9Y296	TPPC4_HUMAN	-0.3	Trafficking protein particle complex subunit 4
Q02548	PAX5_HUMAN	2.68	Paired box protein Pax-5
Q9Y3D6	FIS1_HUMAN	-2.39	Mitochondrial fission 1 protein
P27694	RFA1_HUMAN	1.12	Replication protein A 70 kDa DNA-binding subunit
Q9NQI0	DDX4_HUMAN	6.77	Probable ATP-dependent RNA helicase DDX4
O95997	PTTG1_HUMAN	0.5	Securin
Q13573	SNW1_HUMAN	1.26	SNW domain-containing protein 1
P02511	CRYAB_HUMAN	0.21	Alpha-crystallin B chain
P12272	PTHR_HUMAN	-0.5	Parathyroid hormone-related protein
P10163	PRB4_HUMAN	7.42	Basic salivary proline-rich protein 4
P43155	CACP_HUMAN	1.2	Carnitine O-acetyltransferase
Q9NQC3	RTN4_HUMAN	2.6	Reticulon-4
P09693	CD3G_HUMAN	-0.3	T-cell surface glycoprotein CD3 gamma chain
P16471	PRLR_HUMAN	1.82	Prolactin receptor
O60888	CUTA_HUMAN	-0.23	Protein CutA
Q04206	TF65_HUMAN	2.27	Transcription factor p65
P51608	MECP2_HUMAN	1.54	Methyl-CpG-binding protein 2
O43464	HTRA2_HUMAN	0.85	Serine protease HTRA2, mitochondrial
Q08209	PP2BA_HUMAN	0.9	Serine/threonine-protein phosphatase 2B catalyt
P37231	PPARG_HUMAN	0.51	Peroxisome proliferator-activated receptor gamm
P42224	STAT1_HUMAN	-0.11	Signal transducer and activator of transcriptio
P31751	AKT2_HUMAN	0.88	RAC-beta serine/threonine-protein kinase
P32004	L1CAM_HUMAN	1.27	Neural cell adhesion molecule L1
P46937	YAP1_HUMAN	2.69	Transcriptional coactivator YAP1
O14832	PAHX_HUMAN	-0.18	Phytanoyl-CoA dioxygenase, peroxisomal
Q07108	CD69_HUMAN	-0.89	Early activation antigen CD69
P46531	NOTC1_HUMAN	4.19	Neurogenic locus notch homolog protein 1
P15309	PPAP_HUMAN	0.09	Prostatic acid phosphatase
Q9Y6Q9	NCOA3_HUMAN	5.33	Nuclear receptor coactivator 3
P51946	CCNH_HUMAN	-0.91	Cyclin-H
Q14191	WRN_HUMAN	0.71	Werner syndrome ATP-dependent helicase
Q16186	ADRM1_HUMAN	1.79	Proteasomal ubiquitin receptor ADRM1
P21815	SIAL_HUMAN	2.5	Bone sialoprotein 2
O75469	NR1I2_HUMAN	2.98	Nuclear receptor subfamily 1 group I member 2
P07602	SAP_HUMAN	0.22	Prosaposin
P02545	LMNA_HUMAN	2.74	Prelamin-A/C
P14635	CCNB1_HUMAN	1.51	G2/mitotic-specific cyclin-B1
P08047	SP1_HUMAN	4.71	Transcription factor Sp1
P61244	MAX_HUMAN	-1.76	Protein max
P02686	MBP_HUMAN	2.6	Myelin basic protein
P04234	CD3D_HUMAN	-0.95	T-cell surface glycoprotein CD3 delta chain
Q93009	UBP7_HUMAN	1.02	Ubiquitin carboxyl-terminal hydrolase 7
Q9Y613	FHOD1_HUMAN	2.77	FH1/FH2 domain-containing protein 1
Q99801	NKX31_HUMAN	1.37	Homeobox protein Nkx-3.1
P11473	VDR_HUMAN	5.81	Vitamin D3 receptor
P29353	SHC1_HUMAN	2.62	SHC-transforming protein 1
P05455	LA_HUMAN	0.79	Lupus La protein
P61328	FGF12_HUMAN	0.1	Fibroblast growth factor 12
P10114	RAP2A_HUMAN	-0.24	Ras-related protein Rap-2a
Q9C000	NLRP1_HUMAN	0.96	NACHT, LRR and PYD domains-containing protein 1
P11309	PIM1_HUMAN	2.41	Serine/threonine-protein kinase pim-1
P04156	PRIO_HUMAN	12.9	Major prion protein
P54725	RD23A_HUMAN	0.87	UV excision repair protein RAD23 homolog A
P21246	PTN_HUMAN	0.29	Pleiotrophin
P15311	EZRI_HUMAN	1.17	Ezrin
Q9UKV8	AGO2_HUMAN	0.91	Protein argonaute-2
Q9BQ15	SOSB1_HUMAN	3.44	SOSS complex subunit B1
P50440	GATM_HUMAN	-0.49	Glycine amidinotransferase, mitochondrial
P10912	GHR_HUMAN	0.11	Growth hormone receptor
Q00987	MDM2_HUMAN	-0.43	E3 ubiquitin-protein ligase Mdm2
Q9BQB4	SOST_HUMAN	0.82	Sclerostin
Q49AN0	CRY2_HUMAN	0.32	Cryptochrome-2
P17677	NEUM_HUMAN	-0.17	Neuromodulin
Q9UBB5	MBD2_HUMAN	8.49	Methyl-CpG-binding domain protein 2
Q15185	TEBP_HUMAN	2.39	Prostaglandin E synthase 3
Q9H981	ARP8_HUMAN	1.43	Actin-related protein 8
Q8N4Q1	MIA40_HUMAN	4.42	Mitochondrial intermembrane space import and as
P00533	EGFR_HUMAN	2.96	Epidermal growth factor receptor
P46108	CRK_HUMAN	2.1	Adapter molecule crk
P35611	ADDA_HUMAN	2.32	Alpha-adducin
P50542	PEX5_HUMAN	-0.68	Peroxisomal targeting signal 1 receptor
P16442	BGAT_HUMAN	-0.32	Histo-blood group ABO system transferase
P00441	SODC_HUMAN	1.46	Superoxide dismutase [Cu-Zn]
P40337	VHL_HUMAN	1.73	Von Hippel-Lindau disease tumor suppressor
P03372	ESR1_HUMAN	2.12	Estrogen receptor

## Sheet: PDB
PDB chain	PScore
2z00A	-0.06
1i12A	-1.01
2e3dA	-0.45
3qpiA	-1.09
3m8tA	0.09
3n89A	0.52
4qa5A	0.26
1zczA	0.24
4ip5A	-0.16
4pp4A	-1.44
3a7iA	-0.43
4e9iA	1.05
2jg1A	0.48
2rfmA	-0.86
1pl8A	0.74
3evfA	0.16
4jgwA	-0.29
4jbsA	0.55
3rkoF	-1.45
2onhA	-0.48
1x3kA	1.34
3i26A	2.96
3rkoC	-0.75
4lb0A	1.33
2iwaA	-1.25
2we8A	0.58
4q0pA	-0.08
2zkmX	0.62
1jcfA	-0.72
4i8oA	0.39
4hesA	0.38
3p5pA	0.64
3isxA	0.3
1gvfA	-1.13
4qvrA	1.42
3igqA	-1.04
3dmnA	-0.15
4atgA	-0.7
4koaA	-0.7
3kzpA	-1.67
3ry7A	-0.31
3be6A	0.8
1z4eA	-0.45
3pjzA	0.26
1yumA	-0.58
1t9iA	-0.72
4xxfA	-0.42
1wohA	1.08
4i0wB	-0.27
2z4sA	0.66
4bolA	-0.76
1v5iA	0.96
4qhsA	0.34
3wtnA	0.4
1jh6A	-1.38
3q3vA	0.72
4p96A	-1
3zojA	-0.62
2bcgG	-0.77
4axnA	0.35
2anxA	-2.32
1s58A	1.13
2bcgY	-0.29
3cq0A	-1.25
4l0fA	1.26
4h4gA	-0.25
3mz2A	0.22
2zzrA	1.09
1i78A	2.11
3uxjA	-1.09
4g1kA	0.96
3sk3A	-0.15
3trcA	-1.27
3f9tA	0.67
3pxlA	2.44
3a1sA	-0.91
1sw6A	-0.02
1htrB	1.28
3atsA	0.21
4cjxA	0.03
3hd5A	0.41
3cc6A	-0.1
4i4kA	-1.18
3ghaA	0.96
2hpsA	-0.31
1ky3A	-0.21
3akbA	-0.31
2ynmC	0.85
2yn0A	0.68
2ynmD	0.55
4e40A	-1.3
3tzlA	-0.64
4pq0A	1.8
1odzA	0.67
4nssA	-0.42
4r85A	-0.53
4wujA	-0.35
2z62A	-1.04
1cidA	-0.86
2ia1A	-0.36
1wl8A	-0.85
4dh2A	-1.38
1r18A	-0.67
4nvrA	0.35
2j07A	0.73
2r5tA	0.19
1jatA	-0.35
1kyfA	-1.13
3vp5A	-2.43
1lkoA	-1.27
1x9iA	-0.88
1gcyA	3.07
1kzlA	0.09
2a6zA	0.97
1ooeA	-0.69
1mskA	-0.71
4offA	-1.8
1dmlA	-0.7
3u50C	-0.76
2hwyA	-1.59
4tzmA	0.71
2zjrM	0.85
3c8uA	0.58
2zjrI	0.27
4hbcH	0.96
1pt6A	-1.14
4ob9A	0.83
3bk6A	-0.63
2zjrC	1.3
3kbeA	1.65
2v84A	-0.06
1xt8A	-0.12
3d3qA	-0.83
1yrtA	-0.35
4nguA	-0.07
3st1A	0.25
3rbyA	1.96
2qjcA	0.6
2a4dA	-0.77
1h0hA	1.19
1q7eA	1.65
4indA	0.26
3lduA	-1.27
3iam6	-0.98
1so7A	0.51
3iam4	1.34
3iam3	1.31
1np7A	0.98
3iam1	0.37
2f4pA	0
2eggA	0.65
4b8yA	-0.66
2q47A	-0.43
4g1uC	-1.16
4pz0A	-0.38
4j4wA	-0.67
3irpX	1.11
2o6wA	-0.41
4g6cA	-0.21
2dg7A	-0.8
4uosA	-1.06
1w07A	-0.68
1v6tA	0.54
4k7cA	-0.56
1y3tA	0.57
4cdbA	-0.81
4pibA	0.44
2zfgA	2.91
3bh3A	0.5
1fs5A	-0.17
1qwkA	-0.84
2yv2A	0.16
2vrqA	1.08
4gb7A	0.52
2qybA	-0.57
2vhkA	2.48
2xr6A	0.76
1o20A	1.21
3wfdC	-0.11
3k8kA	0.86
1usgA	0.03
2dwkA	-0.72
3l12A	0.28
4pnlA	0.37
1akyA	-0.41
3bq3A	-1.23
1af7A	-0.83
3kxwA	-0.24
1u53A	-0.05
2ggcA	-0.17
1peqA	0.45
3ur8A	0.31
4d10A	1.23
4czxB	-1.44
1xkiA	-1.27
4aw2A	2.18
2fl4A	0.17
4kysA	-0.46
3e54A	-1.56
3fidA	-0.52
2cuyA	-0.52
1kblA	2.47
4it1A	0.37
3lg3A	0.66
4izeA	-1.23
3q6bA	-0.39
3bnjA	0.2
3sigA	1.61
2x41A	1.52
2aazA	0.21
3ewmA	0.35
1wy0A	0.33
3ujpA	-0.54
4ou9A	0.43
1d2fA	0.79
1ebdA	-0.01
2dxqA	-0.35
1rz4A	-1.54
1pjaA	0.42
3pu9A	0.14
1avbA	-0.35
2greA	-0.23
4fsoA	1.19
1c8bA	-0.91
4utuA	-0.68
4ln9A	0.74
3comA	-0.2
3i45A	0.87
4egcB	0.54
4u0gA	-1.16
3lmbA	-0.76
4eiuA	-0.29
1li5A	0.7
2wfoA	0.28
4g9bA	1.01
1oi4A	0.08
4o30A	-0.47
3bjvA	-0.44
3gwyA	-2.02
2q3tA	-0.9
2f1rA	-1.04
2h88B	1.17
2h88A	0.79
3bxwA	0.23
2i13A	0.07
3bbyA	0.16
3cm3A	0.34
1bd3A	0.48
4fccA	1.03
2x12A	0.65
3wswA	-0.88
3i4hX	-0.3
4iknA	-0.59
1inpA	0.36
3v98A	0.05
4irvA	-1.21
4b93A	-1.55
2wnoA	0.12
4w5kA	1.18
1g43A	1.43
3ih5A	-0.01
3u1wA	1.29
1wpnA	-1.9
1ut1A	2.36
3vibA	-1.41
3tlfA	-0.74
3tx2A	-0.27
4jwoA	0.03
3dr4A	0.34
1xuvA	-0.46
1dowA	-1.66
2b2cA	-0.42
3rz3A	0.48
1w5fA	0.32
3cz8A	0.05
1xtpA	1.15
4fzxC	-0.33
2g39A	0.21
2guiA	-0.69
3qnsA	1.21
4n30A	-0.6
3qkgA	0.19
4by2A	-0.21
2p9jA	-0.83
3mozA	0.17
2jcbA	0.07
3donA	-0.65
4hktA	0.35
4dcdA	1.06
4j2gA	0.57
2z01A	-0.02
3hurA	-0.73
1zunA	-0.43
1zunB	-0.05
3tjzC	-1.87
3h7oA	-0.21
3bryA	3
4dqzA	0.95
3c25A	0.77
2yg2A	-0.15
1nlfA	0.14
4a1rA	-0.52
1gweA	2.74
3nkeA	-0.86
4l2iB	-0.81
2fpnA	-0.96
2ev1A	-1.17
1d3yA	-0.62
3p9yA	0.1
3ctdA	-1.75
1pzlA	-1.27
4i4tA	-0.04
1i6aA	-0.67
4nq3A	0.71
3bexA	-0.87
4mitA	-0.27
3t9yA	-1.72
4aylA	0.97
2uxtA	0.7
3imlA	1.28
1xdpA	-0.12
3zh9B	-1.09
3i5gC	-1.05
1q1rA	-0.57
2ogiA	-1.8
2hekA	0.96
4by7X	-2.17
2p11A	-1.23
4ammA	0.19
3wt4A	1.26
2r2cA	-0.69
2pt5A	-0.78
3acxA	-1.03
4p2xA	-0.33
3k8tA	0.6
1z34A	-0.45
1nxmA	-0.59
3zytA	2.23
1zk5A	0.79
3sopA	-0.01
3r8wA	0.71
3im1A	-0.59
4mpcA	0.21
2bdqA	-1.11
3gdiA	0.5
4r6fA	-1.09
3bmvA	1.68
3b98A	0.04
3ivyA	2.32
2pigA	0.98
3lx2A	-0.36
3lqnA	-0.73
1ppjA	1.05
2p1jA	0.24
1tyjA	0.11
1mw7A	-0.98
2pv7A	-0.65
2absA	-0.2
3wh2A	1.39
1gpmA	0.9
1eexB	-0.92
3anwA	0.13
4kkzA	1.64
3k35A	0.02
3orsA	-0.17
4e6zA	-1.24
4mozA	-0.57
4hq1A	2.07
4wweI	-1.61
3igzB	0.63
3buxB	-0.76
2uz1A	0.69
1yqsA	0.82
3bdvA	-0.81
1qhfA	0.15
2qh5A	-0.73
2i6lA	0.51
1wcv1	-1.18
4knfA	0.19
1t61A	1.85
3hy0A	2.79
1vemA	1
3va9A	-0.46
4b79A	-1.46
4alyA	-0.68
1ei6A	0.39
1zd0A	-0.72
3nekA	-0.33
1gxmA	2.47
1a3wA	0.39
2jafA	-1.27
4wkyA	2.51
4madA	1.81
3sp1A	-0.13
1rjdA	-0.01
3cghA	1.48
4wrtA	0.85
3ib6A	-0.04
3a98B	-0.33
4fhrB	-1.3
4x00A	-0.32
2vmhA	-0.21
2ooiA	-0.78
4oztE	-1.29
1vpaA	-1.33
2iqtA	-1.51
4p09A	0.1
4ktbA	0.45
3dtyA	0.41
3wdcA	-1.85
4olsA	2.32
3vlaA	3.12
1mjfA	-0.82
3mzvA	-0.8
3rsnA	1.31
3dy0A	0.26
2q4mA	-0.38
4fmrA	-0.04
2j49A	-1.27
1zejA	-0.68
3svlA	-1.16
2uyoA	-0.93
4jb3A	0.11
1wb4A	0.92
4uwhA	0.2
1r5bA	-0.39
4o1nA	-1.15
4cabA	1.43
2nx8A	-0.81
2c07A	-0.12
3w6zA	-0.14
3n72A	-1.27
3g13A	-1.11
4i17A	-1.04
1kwfA	1.16
3feqA	-0.17
3b9pA	0.23
2r60A	0.35
4g0iA	0.15
2hqvA	1.59
4ovyA	0.73
2etjA	-0.67
2f4mA	-0.69
3dbyA	-1.56
4qgeA	2.18
1nyrA	0.45
3tduA	-0.92
4do3A	2.07
2ghvC	0.78
2zyqA	-0.11
1vimA	-1.89
3v9aA	-0.23
3lacA	-0.85
4p1lA	0.92
3czpA	-0.29
2a2rA	-0.99
2oxtA	1.67
2zb9A	-0.46
3d5pA	-0.59
3ecmA	-0.25
2c0hA	0.64
2obbA	-1.17
2nrrA	-0.21
3wydA	1.64
3iqwA	-0.46
2ymuA	1.01
4pswA	0.3
4mi5A	-0.24
1omhA	-0.6
4q2tA	0.17
4lzhA	0.4
3hoaA	0.91
3f2iA	-1.66
1vj7A	-1.1
4heqA	-0.99
4acyA	0.17
1kdgA	1.5
2e3bA	1.32
4atyA	-0.35
2ea3A	4.69
1r8eA	0.74
4b2oA	0.54
1edgA	0.83
3q1pA	-1.46
4l6eA	-1.69
3smtA	-0.26
7a3hA	0.26
2ib8A	0.12
4mc3A	-0.6
1zi8A	0.29
4mx8A	0.14
3qhbA	0.2
2y8dA	-0.84
3b40A	1.14
2fkbA	-0.61
2onfA	1.68
3h11A	0.16
2ydyA	-0.93
3eleA	-0.14
2yogA	-0.89
3nuhB	-0.03
3myrB	0.49
3myrA	2.24
1l3lA	-1.16
4qhqA	-0.13
4oagA	-0.74
3t2lA	0.24
4m9rA	0.32
4gs1A	0.87
3pjxA	-0.19
3etvA	-0.75
1t9kA	-0.56
4ok7A	0.3
2ganA	-1.43
3cjpA	-0.61
3c8fA	0.57
1xb4A	-0.7
1cg5A	-1.98
4kceA	-0.94
1krhA	0.21
3hzjA	-0.31
3qs2A	0.49
4fojA	-1.56
4cu4A	1.58
2q18X	-0.83
1uesA	-0.4
2irmA	-0.63
2fcrA	0.66
2ywxA	-1.29
3gwcA	0.96
4kt6A	-0.38
4huqT	-0.81
2yn2A	-0.46
3seeA	-0.58
4huqB	-0.59
3eeyA	-0.68
1o1zA	-0.19
2prsA	-0.67
3pl1A	1.35
3keoA	0.09
3cqyA	0.4
1pnoA	-0.85
4xl8A	1.83
3kf3A	0.97
1zbrA	0.18
3vqtA	0.69
3zeuB	0.77
2d4xA	0.9
3zeuA	-0.67
4f67A	0.25
4ncxA	0.37
4ercA	-0.18
3pbpA	-0.49
4n7tA	0.61
3pbpB	-0.05
2wh7A	0.06
2edmA	-0.56
2w2kA	-0.68
4l5rC	-1.54
3ntnA	1.65
2qtsA	0.55
2xa0A	2.01
4g7aA	-0.74
1gxrA	0.93
1u5uA	0.53
1ydxA	0.99
3q1nA	0.51
2owmA	1.39
4tloA	-0.17
3i7dA	2.34
1t8sA	0.42
2vvrA	-0.44
4qtpA	-0.52
1zyoA	0.11
2fe3A	1.19
1o5oA	-0.5
3ia8A	0.17
1bu6O	0.42
3ox6A	-1.68
1io2A	-0.98
4wnyA	-0.87
1w2wA	-1.05
2vgeA	0.18
1kczA	1.25
2cmgA	-0.64
1ft5A	1.22
3wyfB	0.91
3vowA	-0.05
3qfgA	-0.62
1uf5A	1.79
3t6gB	-1.13
1i5gA	-1.68
3efyA	-0.45
4jg5A	1.01
3o4fA	-0.08
3sbmA	-0.79
3te4A	-0.69
3dsqA	0.41
4j7oA	-0.64
3kbgA	-0.61
3d3sA	-0.59
4cc0A	4.47
4oq1A	-0.31
3cwcA	-0.35
2osaA	-0.47
3cnlA	-0.35
4q98A	0.94
1uozA	1.92
3c7mA	-1.22
4wh9A	-1.1
3hvnA	-0.41
4ls6A	0.6
2vouA	1.14
1ki1B	-0.72
2e56A	-0.4
1r71A	-0.86
3frkA	-0.26
1okiA	0.41
2ixeA	0.54
1s5aA	-0.8
3fnrA	0.38
1ah7A	0.08
2q32A	-1.25
2q45A	-1.19
4aqsA	2.32
4ku4A	0.78
3kn1A	-1.03
1wzaA	1.15
4fqdA	0.17
4nyqA	0.92
1a73A	0.06
2dg5B	0.23
3lrvA	-0.12
3gq8A	2.37
2hz6A	-0.13
2g7zA	-1.69
3l7iA	0.63
1y0pA	-0.02
1bdfA	-1.28
2cf7A	-1.33
3ragA	-0.08
2pkfA	0.16
3b2yA	-0.2
4bjzA	-0.27
1vrbA	0.05
3lreA	-0.82
4otwA	-0.22
3r31A	1.23
4oh7A	-0.59
3nv0B	0.44
1o59A	0.29
3wctC	-0.17
3wctD	-0.37
2q0lA	0.65
4o8mA	-0.34
3pmeA	-0.49
2gdqA	0.44
1w1hA	0.04
4mf5A	-0.43
3nv0A	-0.12
4g2aA	-0.08
2qi9C	-0.95
2i2oA	-1.21
2qi9A	-1.39
3vseA	0.18
1qtwA	0.42
4ilvA	2.77
3wugA	-0.11
4gnkE	-0.32
2imsA	-1.6
2wjiA	-0.79
3istA	-0.44
3qszA	-0.58
3s40A	-0.68
2wawA	0.61
2e7yA	0.43
3v6oA	-0.63
3e4wA	0.87
2x47A	0.01
3h4rA	0.64
4ojmX	0.57
3jurA	0.13
4aweA	2.37
3e3mA	0.46
4e6nA	-0.26
4pj6A	0.54
3cq9A	-0.26
3ontA	1.04
4je3A	0.54
3zzhA	-0.79
1pjcA	0.25
4p27A	-0.96
3ct4A	0.81
1isiA	-0.36
4doyA	0.59
4mo4A	1.52
2zuxA	1.65
2dq0A	-0.74
3sw5A	0.55
2olgA	0.51
2a7kA	-0.98
1t3bA	-1.21
2ffyA	-0.26
4i98B	-0.3
2yf4A	0.95
2grjA	-0.5
2nn6I	0.92
2nn6H	-0.31
4ns2A	0.29
2vliA	-0.31
1knvA	0.05
3m4wA	0.56
2nn6B	-0.22
2nn6D	-0.27
3okgA	1.69
3dclA	0.59
3eojA	0.14
1q2lA	-0.23
2q3zA	1.24
4douA	1.64
4toiA	0.49
1yspA	-1.42
1zvfA	-0.24
2yvkA	-0.18
2v1uA	0.91
2qc3A	-1.37
1cydA	-0.35
4luqC	-0.16
4irtA	0.29
3aeyA	-0.99
1sfeA	-0.84
4o8vA	0.28
3nreA	0.43
3dsmA	-0.05
1ez0A	0.93
4arvA	0.43
3uq8A	-1.08
1u5hA	-1.51
4l00A	-1.17
4lk5A	-0.43
3zdrA	0.04
1f5mA	-1.27
4b2fA	-1.95
3ctbA	-0.2
1oygA	0.82
3ufbA	0.37
1w5dA	0.6
2b9sA	0.09
2zexA	-1.52
1n1cA	-1.08
3l19A	-1.12
2qiaA	0.19
3qnqA	-0.64
2yykA	0.6
4k17A	-0.04
2osoA	-0.98
3lbxA	-1.9
1njrA	0.51
2wd6A	1.28
3q7cA	-0.38
4b7cA	0.38
1dyoA	0.43
3wxmB	0.56
2e1mC	1.18
4omvA	-0.52
1fukA	-0.76
1a0pA	-1.51
3zlbA	-0.33
4npjA	-0.38
1yq5A	-0.45
1hcuA	2.26
1iweA	1.06
2g3fA	-0.62
3hl6A	-1.21
4cqhA	0.55
3vasA	-0.49
3aowA	0.16
2xvyA	0.24
3irsA	0.71
1jjfA	1.44
2ct9A	-0.47
4kp1A	1.41
4jq6A	-0.08
3cogA	-0.28
1vjrA	-0.36
3u22A	-0.84
4cd5A	-0.06
3u55A	-0.78
1yioA	0.73
1gtkA	-0.77
2yfuA	1.12
2h1vA	-0.41
1ek6A	0.25
4kgmA	-0.93
4ilkA	1.31
4kd6A	-0.09
3mw9A	1.74
4nkrA	0.57
4hzdA	-0.4
3o74A	-0.74
2gd9A	-0.23
3kz4A	-0.84
3rysA	-1.35
1pg5A	0.7
1rxdA	-0.7
4f52A	-1.53
4ksiA	0.16
3iam9	-0.53
1v2aA	-0.86
1fmjA	-0.41
4ry8A	-0.15
4pp8C	1.11
1h5wA	-0.24
4ev8A	-0.71
3e8pA	-0.35
4mteA	-0.86
3v85A	0.52
1g4mA	1.34
3iam5	-0.72
3u4yA	-0.23
1zmoA	-0.07
2o4vA	3.35
1fpzA	-1.01
4bndA	-0.85
4s1nA	0.94
2je0A	-0.3
3bmzA	2.47
3ktaA	0.19
3ktaB	-0.48
1xvxA	-0.05
4lobA	-0.36
2nwhA	0.56
4basA	0.17
3vr0A	-0.37
3w0kA	0.44
3cjmA	-0.13
4nbtA	0.1
2no4A	0.41
1jmkC	-0.67
4mhbA	-1.21
3ljxA	-2.05
1mw5A	-1.51
3do5A	-0.73
5mdhA	0.3
2qr3A	-0.92
4gmkA	-1.31
1rkqA	0.24
4jwxA	0.96
3en0A	-0.15
3vqiA	-1.69
4r4gA	-0.21
3f9xA	-0.74
3lpfA	0.34
3c5iA	-0.51
2x0kA	0.22
1dpgA	-0.36
1n8pA	-0.07
1aj2A	0.14
3hidA	1
1wltB	-0.11
3k4oA	-1.79
1iz0A	-0.45
3sjnA	-0.24
2btyA	-0.92
1v2dA	-0.2
1edoA	-0.73
1m4zA	-1.3
1v1aA	1.27
3fp3A	0.88
2wfpA	-0.47
1llfA	1.63
4aqnA	0.99
2vefA	-0.1
3nemA	-0.38
3tqcA	-0.41
2zvyA	0.59
2cvhA	-0.24
1yc9A	1.39
4rv7A	-1.09
3guyA	0.73
1z94A	0.04
1jp4A	-0.54
2z1qA	1.26
4jigA	-0.16
2arzA	-0.23
2y71A	-0.78
1yxaA	1.05
3hkvA	-0.1
2y24A	-0.12
3hx6A	1.84
4f53A	1.55
4h3tA	-0.5
1k0iA	-0.45
2ii3A	0.12
4eadA	0.72
1t6lA	-0.74
1kv9A	1.4
1lg7A	1.61
4q51A	0.34
3iwgA	-0.77
3ebyA	-0.68
1rh1A	1.73
3ipqA	-0.91
1gmlA	0.26
4ovkA	-0.58
2cwzA	-0.62
3ld1A	0.26
1e4iA	2.07
3iquA	-1.21
4l07A	-0.7
1s7jA	0.15
1mjhA	-1.68
3q4gA	0.03
2jksA	0.96
2x5dA	-0.39
1gv9A	1.74
3bleA	-1.21
1oyzA	-0.98
2jc4A	-0.36
3qwxX	0.56
4c9gA	-0.18
2y3vA	-1.86
2o7tA	-0.67
2jexA	2.6
1r0vA	-0.17
3ckjA	0.63
4uwjA	0.1
1wmzA	0.26
1xkzA	0.08
4jgpA	-0.95
4q1vA	2.36
1v7wA	2.71
2r37A	-0.02
2d29A	0.53
3qq2A	2.35
1yarH	-0.66
4bpuB	0.92
1yarO	-1.36
1ve1A	2.12
3u2gA	2.69
1dusA	-0.12
3gxhA	-1.49
2hqxA	-0.32
2esbA	0.08
3zpyA	2.42
3nngA	1.08
2o1zA	-1.84
3tmaA	-0.26
4b1yB	0.81
4htpA	-1.06
2g82A	-1.02
3tdwA	-0.29
2q2eA	-0.61
1f82A	0.4
2yrrA	-0.03
3cddA	-0.58
1xjdA	-0.31
4ca7A	-0.39
4fz2A	-0.33
1q8cA	-2.47
2c0jB	-1.72
3s84A	-0.42
2wcjA	-1.72
1mdaH	1.11
2it2A	-1.4
1g0hA	0.03
2d74B	-0.21
3drwA	-0.62
4i84A	0.6
3bg3A	1.12
1nhsA	-0.64
1g5bA	-0.71
1b0uA	-0.55
3tsnA	0.32
3f2kA	-0.62
3nv9A	1.54
2q7sA	0.16
3vwnX	1.94
2jg5A	0.29
1npbA	-1.19
3bomB	-1.19
4jqrA	1.67
1r8gA	-0.15
2h29A	-0.89
2zkiA	0.4
1a4iA	-0.58
4esmA	0.11
3zboA	-1.33
1pl4A	1.48
2ggzA	-0.74
4lg1A	-0.17
4uxvA	-1.11
4hs9A	-0.12
3w7bA	0.63
3rloA	-1.07
3r3iA	-0.06
4pzuA	-0.24
2xtlA	-0.36
4feyA	-0.17
4l4vA	2.11
3m9lA	0.74
3tpfA	-1.57
4o94A	-0.94
2cxnA	1.56
4b4uA	-0.53
3craA	-1.15
3wpcA	1.33
2zsiA	0.89
4fwiB	-0.08
2ot9A	-0.86
2z99A	-0.61
1xqiA	0.05
4qasA	0.02
3t8rA	-0.76
1h4pA	0.77
1qfjA	-1.29
2plrA	-1.07
1q9cA	-1.2
4iqfA	0.14
4i6yA	0.74
2fctA	0
1zymA	-0.99
2oerA	-0.84
4dohA	-1.75
2ixaA	-0.03
2pgfA	-0.59
4dd8A	-0.06
1mk4A	-1.3
3zhnA	-0.28
3bqxA	0.07
2xphA	-1.35
2hlsA	-0.64
2vq3A	-0.2
4ei0A	0.7
4nj5A	1.69
2higA	0.79
2zzvA	0.12
3trhA	0.1
1oa2A	1.22
3eoqA	-0.54
3txvA	-0.52
16pkA	0.59
3okzA	-0.39
1dfmA	-0.44
2xhiA	1.74
4nfuA	0.24
3esmA	0.6
1vrdA	0.64
1iy9A	-0.96
3qgaC	1.39
4a3qA	0.27
4mduA	-0.18
1zbpA	-0.46
3bz5A	1.09
1xrsB	-0.61
3s9zA	0.44
1at3A	0.77
4bf2A	0.05
4l51A	-0.25
2vr5A	1.27
3ghmA	2.56
4dguA	0.83
3uwlA	-0.37
1b6gA	1.26
1wpuA	0.22
4h6qA	-0.16
2btvA	0.68
3dw8B	1.48
1iybA	3.23
2z1dA	-0.09
4d9sA	2.47
1imvA	1.67
4chjA	-0.23
3bu2A	0.14
1hqlA	-0.21
4lfuA	-0.18
4mz9A	5.6
4dohE	1.89
2yxgA	-0.52
3peaA	-1.19
4lmoA	-1.54
2z86A	0.66
1ku9A	1.06
4idhA	0.44
3hwpA	-1.05
3wp3A	4.56
3b02A	-1.78
1sq9A	0.73
2nmxA	1.07
4dn2A	-0.31
4rg1A	0.02
4fuvA	1.59
1uuqA	2.44
3rkvA	-0.57
1wz8A	-0.01
1l8wA	-0.36
1w0hA	-0.33
3nutA	-0.96
2o7iA	0.69
1vkwA	0.08
3khkA	-0.48
1k7cA	2.89
4ntdA	0.27
1k8fA	-1.66
4m7tA	-1.43
3weoA	1.42
1t0aA	0.3
4rshA	0.32
1b9bA	0.19
3mkhA	0.81
4o6yA	-1.18
2xstA	0.29
2ahnA	2.51
1wr8A	-1.16
1ysrA	0.24
1wu3I	-1.8
2o6sA	-0.76
2bv1A	-1.74
1eg5A	1.78
2p7nA	0.44
1uwwA	1.14
1i52A	-0.81
4u1eI	0.45
4oy2B	-0.36
4oy2A	1.36
1o6vA	-0.09
1u3eM	-0.55
3rofA	-1.18
1xv2A	0.22
2gcuA	0.15
1u0mA	0.1
3hnoA	0.21
2j1aA	-0.29
3r9tA	0.12
2gtrA	0.01
4ejqA	0.07
1tzpA	0.69
3o7qA	-0.41
1xdiA	-0.1
2cf5A	0.21
1gegA	-1.03
2oifA	-0.95
2d5bA	0.16
4r39A	-0.4
1mpgA	-0.33
3c64A	-0.83
3b8fA	-1.63
4o8sA	-0.81
3no8A	0.8
3p32A	-0.3
4hxyA	0.07
4tkoB	1.26
2b99A	-0.27
4mu6A	-1.25
1x92A	-0.61
4c2m3	-0.25
1ihbA	-0.5
2bpa2	1.08
2qdlA	-0.1
2bpa1	0.34
1ntyA	-1.02
3u1xA	0.27
2z3bA	-1.28
4om8A	-0.43
3f85A	-0.18
2novA	0.16
3mduA	-0.06
3ztpA	-1.05
2ra5A	0.42
3ttgA	0.82
2dxuA	-0.56
1zc6A	1.36
3cp3A	0.1
4ijsA	0.21
4ga2A	-1.73
1wf3A	0.17
1z7dA	-0.08
2h6eA	0.2
2ou5A	-0.19
1n2aA	-0.78
1zwxA	1
4i3vA	1.42
3i41A	1.01
3cegA	0.87
3sylA	-0.42
2a9gA	0.41
4mtkA	1.22
4jejA	0.44
3pguA	1.61
2c5sA	0.23
3fgnA	-1.01
4egoA	1.57
2p2vA	-0.66
4bf5A	0.77
3otgA	0.57
3kkeA	-0.24
2af4C	0.07
3dcnA	0.14
1i76A	2.18
3h09A	0.76
3mm5B	0.79
2pxxA	0.42
2ah6A	1.01
2q3xA	0.14
2f1vA	0.55
4qiwC	0.32
3ubdA	-0.6
3hlyA	-0.23
1r3sA	0.84
3pp8A	-0.35
1qjcA	-1.37
1ci0A	-0.75
4ij5A	0.48
4tx3B	-0.71
4cvhA	-1.54
2wnkA	-0.16
3pt1A	-0.09
2a0jA	0.39
2bmeA	-0.55
1szoA	0.87
1j99A	-0.01
2w07B	2.49
3gzgA	-0.55
1vb5A	-1.28
4artA	-0.56
4petA	0.76
1nuyA	-0.08
4baxA	0.77
1vg0A	0.96
1vl7A	-2.03
1yiiA	-1
3k1wA	0.53
1f1gA	1.79
4p82A	-0.72
1z6bA	-0.42
3kd8A	1.22
3c6kA	0.08
3bc1A	0.22
3hj6A	0.74
3r6oA	1.01
4gq2M	0.27
4p5xA	-0.13
3clqA	1.51
3gd8A	-0.59
4a15A	0.96
4bxjA	-0.63
1tvlA	0.01
4do7A	0.31
3anoA	-0.78
4lqsA	0.14
2p3xA	0.33
3lbfA	-1.64
4qqwA	1.88
4b0rA	0.18
4q9vA	-0.29
3p1uA	0.95
1yj8A	-0.52
1pu6A	-1.97
1z0xA	-2.19
1ckmA	0.84
2gksA	0.36
4cdpA	-0.33
4l9bA	1.69
3i8sA	0.21
4i8iA	0.22
4a9vA	1.75
4ci7A	0.77
3k1rA	-0.12
3shqA	-1.46
2r14A	0.9
2qg8A	0.36
4uuyA	-0.52
2fprA	0.37
4pvcA	-1.19
4losA	0.22
3npkA	-1.17
3c9zA	0.69
4qmkA	1.39
1gwiA	1.17
3f6rA	-2.09
4xuuA	-1.57
1gpiA	3.56
1uaxA	-1.79
4inkA	0.29
4bgfA	0.18
3bo9A	-0.57
4nkpA	-0.85
4nzvA	0.47
3tc1A	-0.38
3t94A	-0.54
3bh2A	-0.25
1znwA	0.27
1c96A	1.69
1zs9A	-1.63
3fdsD	0.65
3fdsC	0.34
3awdA	-1.11
2wgpA	-1.51
3nzzA	-0.28
1h5qA	-0.5
4ae2A	0.58
1m65A	-1.31
3e1sA	0.02
3l0fA	-1.04
2eo4A	0.01
2je6B	-0.21
4s1hA	-0.43
1wydA	-0.03
4qb6A	1.57
3wh7A	1.94
3qjoA	0.74
2nt0A	1.6
2qasA	0.45
4f7hA	-0.86
3rivA	0.51
2qy6A	0.51
4r8gE	-0.71
4rctA	0.44
2nygA	0.61
2bhvA	0.23
2ebdA	-0.43
3lqbA	0.6
2fr5A	-0.08
3iruA	-0.27
4gpvA	0.62
3lfjA	-1.15
3f44A	0.39
2eenA	-1.84
4af0A	0.22
1l6xA	0.56
4bucA	-0.04
2ddbA	0.95
2gjtA	-0.64
4f881	1.96
4ni5A	-0.5
3uveA	0.45
4izxA	0.53
4rm7A	0.53
3bdrA	-1.46
2qm4A	-0.96
1lj8A	-0.36
4ooxA	1.24
4bh6A	0.25
4o8uA	0.55
3w77A	0.04
2o2zA	-0.23
3bgvA	-0.32
4mxtA	-0.3
3p4eA	-0.11
4oeeA	0.28
2y26A	0.38
4eq8A	0.7
3rk1A	-0.58
3ua3A	0.18
1t6nA	-0.46
3b4tA	-0.4
3iwaA	1.32
1e0cA	0.2
1uiyA	-0.62
4rplA	1.35
4bloA	-0.7
2cj4A	-1.4
4rqaA	-0.5
1nj8A	0.05
2aj7A	-1.74
1q6hA	0.95
1lnzA	0.06
2pwaA	2.01
1g8kA	1.41
2x5fA	0.5
2reoA	-0.4
4wznA	-1.27
1o65A	-1.4
3lylA	0.45
3ea6A	-0.27
4ki9A	-0.02
2ybqA	0.54
3l6vA	0.46
3sbtB	1.74
2y9fA	0.98
3qanA	0.07
2b4vA	1.15
1iuhA	-0.09
2j7nA	1.14
1to3A	-0.61
1wmxA	-0.34
3r7wA	0.34
1gotB	0.47
1lldA	0.12
4bpsA	0.83
3ay3A	0.1
2aefA	0.11
4e19A	1.36
3tx8A	0.95
4afkA	1.59
4jrlA	-0.05
1jf3A	-0.06
1noxA	-1.45
4oieA	0.92
1vclA	1.92
4ewcA	1.19
1wndA	0.6
4lzkA	-0.39
1f60A	0.38
2o1xA	0.3
2b9hA	-0.68
2ovrB	0.08
1atiA	2.76
1xo0A	-0.11
4ca1A	-0.52
3zn6A	0.74
3hr0A	-0.86
2yxbA	-0.69
2o36A	2.31
1rwhA	2.37
2p0yA	-0.37
3ayfA	0.02
2c0dA	-1.42
1y0kA	1.8
4qjkA	0.81
1j6xA	-0.24
3fncA	-1.08
4quvA	-0.65
4u5rA	0.2
1jy5A	1.13
1cpyA	-0.24
4dgjA	0.46
2bbaA	-1
1udsA	-0.51
1o0xA	1.47
2e4tA	2.74
3ne7A	-1.16
2xbuA	-0.96
4gvoA	-0.75
2di3A	-1.11
2rfgA	-0.58
1xsqA	1.33
3srtA	0.52
2dplA	0.02
3n4iB	1.94
2ggtA	-1.29
4fx9A	0.61
2ntxA	-0.47
4ev1A	-1.12
3g17A	-0.55
3ngqA	0.13
2vptA	0.95
3ismC	0.15
3o36A	-0.06
1j58A	0.46
1o8xA	-0.4
2cxhA	0.3
3ai3A	-0.57
2be7D	-0.61
1uxoA	-1.64
1vk9A	-0.5
3eaaA	0.61
4e6wA	-0.12
3kh1A	-0.78
3og9A	-1.21
4ng7A	-0.07
1hgxA	0.4
3jvnA	-0.93
2oq2A	-1.02
4fs3A	-0.47
2i5eA	0.51
3d37A	0.75
1colA	-1.58
3ahqA	0.61
1qokA	3.1
3s3tA	-1.81
3saoA	-1.45
4chhA	-1.41
4kg0A	-0.25
2cduA	0.26
4q7aA	1.22
3viiA	0.68
1q74A	0.74
4akdA	0
2qe7G	-1.21
4lubA	-1.15
1fd9A	0.54
1g1tA	-2.11
3lfuA	-0.35
1vbkA	0.61
4f0fA	-0.4
4bzaA	-0.69
2q14A	-0.12
2x9zA	0.69
1nd7A	-0.24
3ufxB	-0.27
4c2m4	0.27
1i8dA	-0.88
2y3sA	1.67
4fq5A	-0.88
2dy3A	0.44
2ousA	-0.56
3ibzA	-0.25
1t1gA	2.6
2dv6A	0.54
2odlA	-0.09
2d0jA	-0.15
4c2mK	-0.07
4lkrA	-0.67
2ft0A	-0.94
3o7bA	-0.3
1r8sA	-0.11
2hx0A	-1.25
4mn0A	0.25
2rikA	1.07
4nngA	-1.86
2o04A	2.27
3cw9A	0.8
3wkmA	-0.59
1it2A	-1.96
4nimA	-0.57
1wdcC	0.34
4m7xA	-0.24
2v4iA	0.59
3szdA	2.46
1ys4A	-0.58
3zcwA	0.32
2db0A	-0.93
3sqlA	0.32
3hbkA	-0.8
2dphA	0.34
2b9lA	2.39
4jzkA	-0.8
2nugA	-1.72
4q9aA	-0.56
2ar1A	-0.3
1cs6A	0.28
4dshA	1.03
4peiA	0.04
1tx9A	-0.86
2a6pA	-0.14
3h3lA	-0.6
1sy7A	1.01
3anpA	-0.46
2w7qA	-0.65
2w4eA	-0.83
4ii1A	-0.46
1q47A	1.52
1ft9A	0.29
3lvuA	-0.33
3o0mA	0.94
4g3aA	-0.67
3kawA	-1.75
4kefA	-0.1
2nx9A	-0.06
3khiA	-0.22
3of7A	0.87
3ksxA	-0.57
2i9aA	1.09
3o5cA	0.1
4p6zG	-1
1xg7A	-0.32
1xhcA	0.36
4p6zS	-1.47
3iabA	-0.14
4q4fA	0.94
4k70A	-0.45
2np9A	-0.1
4p53A	-1
4kvgB	-0.68
1mkmA	-1.36
2aqpA	2.36
2htaA	0.1
2e52A	-1.41
4rifA	-0.31
2q49A	0.38
2x8jA	1.8
4j4yA	-0.07
2o6qA	-1.33
3aupA	0.47
1wnyA	-0.3
3ruvA	-0.07
2h8oA	-0.76
3p9nA	0.57
1z02A	0.32
3zy2A	0.82
1u0kA	0.75
3mkrA	-1.1
2fbnA	-0.92
3hnmA	0.67
3ub1A	-1.48
2ihbB	-1.39
1hzfA	0.97
4uz1A	1.89
4db3A	0.51
4f2dA	-0.16
4gm2A	-1.49
3glvA	-0.52
1cztA	-0.12
3na5A	0.25
2ql8A	0.17
3r9vA	-0.07
2qyhA	-0.04
2ychA	-0.21
2cioA	2.15
4ipaA	-0.09
3eujB	-2.11
2r8rA	-1.66
2vhaA	-0.35
2hzgA	0.24
4o8qA	0.78
3hg3A	0.1
1i2kA	-0.94
4o1kA	-1.21
1ekrA	-1.54
2oseA	1.25
1yrrA	-0.12
1zhxA	-0.69
2w40A	-0.06
1m2kA	-0.43
3mc1A	-0.09
4mo1A	-0.06
1vqzA	-0.02
1tp9A	-1.65
2iuyA	1.41
1nkqA	-0.25
2bmoA	1.54
2bmoB	-0.87
2akzA	0.26
3gseA	0.35
3mtiA	-1.8
3onpA	-0.62
2b1mA	1.46
3simA	0.81
3c6aA	-0.19
4fvmA	1.66
4qblA	-1.04
1z9hA	-0.44
3tfzA	-1.28
1booA	-0.4
2dt9A	-1.04
3w2wB	0.52
4nuaA	-0.7
1y6zA	0.18
4cj0A	1.1
1v8dA	0.35
3lmlA	-0.02
4didB	0.44
3agcA	0.36
3biqA	1.61
2wfiA	1.08
3eulA	-0.92
1mtyD	-0.46
1mtyG	-0.84
1knzA	-1.04
4jz6A	1.75
3e2iA	-0.35
4ne4A	-0.57
3oljA	-1.18
3n77A	-1.09
3hkmA	-1.66
3ddmA	1.12
2oryA	0.98
4rv9A	-0.89
1w99A	1.27
1n71A	-0.96
1qusA	0.94
2qc7A	-1.78
1trbA	0.93
2asuB	0.92
3gorA	-1.55
4ehiA	1.43
1vjgA	0.62
3lm3A	1.8
2axoA	0.19
1fnoA	1.29
3c3jA	-0.22
1vb3A	0.03
3ojoA	0.31
4jzaA	0.47
3kijA	-0.77
4kmsA	-0.23
3npiA	-0.28
2bykA	-0.96
4c5kA	0.34
3wolA	1.95
4kamA	0.51
3a2zA	-0.33
4wpcA	0.03
1yjgA	-1.64
3hj4A	0.99
2ij9A	-0.61
4wbdA	-0.55
4mq0A	1.74
1iicA	1.13
2nr4A	-0.88
2pnwA	1.08
2yzkA	0.19
2qimA	-0.94
1tvnA	0.18
3iq1A	-2.12
3osjA	-2.56
4l8fA	0.55
2h2wA	-0.98
1dykA	0.81
4cydA	-0.58
4u7uK	-0.89
2vd2A	-0.74
2a4vA	0.24
3or1B	0.81
1nykA	0.84
3k3wA	2.86
3k3wB	2.19
1pg6A	0.3
4frfA	-0.48
2g04A	0.73
1r45A	0.29
2brjA	1.37
2c20A	-0.77
2obyA	0.32
2cbzA	-0.5
3cmiA	0.1
2p0bA	0.61
1um8A	-0.83
1g3qA	-0.18
3o0gD	-1.12
3u0aA	0.6
2xveA	0.85
3u26A	-0.74
2hq4A	-0.9
3tr9A	-0.24
4frxA	3.35
3m8oH	0.57
4m5eA	0.64
3dgtA	3.56
4byfA	1.08
3cl5A	3.02
4nzpA	-0.29
3l8uA	-0.77
4g6iA	-1.13
4hf0A	0.17
3eb7A	0.98
3tr0A	-0.47
3fdqA	-1.34
2z43A	-0.13
1rm8A	3.38
3astA	2.38
2ycuA	0.57
4cxfA	-0.85
3gm5A	-0.95
3dodA	0.61
2q80A	-0.7
1vhxA	-0.89
1or4A	-2.33
3nuqA	-1.21
1zbsA	-0.12
4m4dA	0.63
4r3nA	0.28
3n5mA	0.2
3soyA	0.09
2gl5A	-0.34
4wt7A	0.29
2znrA	-1.56
2vvfA	-1.42
3cjiC	1.26
4uzyA	0.1
1jqkA	0.44
4cfiA	1.01
3gdcA	1
2pimA	0.65
2oayA	0.17
2nt2A	-2.3
2vshA	-1.36
4o5nB	0.28
3aiiA	0.43
2qy0B	2.1
1w6tA	-0.12
2c78A	0.83
2oogA	0.25
2d3yA	1.51
3tixB	0.38
3q0wA	-0.73
2w3jA	0.16
4jccA	-0.77
3lfhA	-2.07
2hxvA	0.66
1dkqA	0.28
3p42A	-0.79
3odgA	-0.06
3dfzA	-0.61
3bijA	1.37
1itxA	2.97
2gb7A	-0.99
3hcjA	1.63
1ztcA	-1.29
1qhxA	-0.69
4d05A	0.71
2opjA	1.14
3vsnA	0.98
2c2xA	0.56
2jg0A	0.55
4enfA	-0.42
3mvdK	1.65
3fvvA	0.57
1p77A	-0.33
4n7cA	0.33
4gouA	0.78
1i1rB	-1.64
1vddA	0.74
2cv8A	-0.32
2hkjA	-0.14
4wczA	-1.04
3kmvA	0.72
1vgjA	-1.57
2x2uA	0.49
3ntuA	0.78
3qfeA	0.95
4maaA	0.73
3p4gA	1.32
3deoA	-1.83
2o2xA	0.88
1f8yA	-0.65
3u3pA	0.93
3csvA	-1.27
3pzgA	0.37
3cymA	-0.04
2a8nA	0.76
1hruA	0.08
1kq6A	-0.29
3ig5A	-0.51
3ch4B	-0.3
2c1lA	1.64
1xfdA	0.87
1rh5A	-0.15
4uqwA	-0.8
3mmzA	-0.14
1j7xA	-0.77
1e4mM	2.5
3rcqA	-0.65
1h1oA	0.89
2r6aC	1.26
3fd3A	-1.16
2q4wA	1.47
1o63A	-0.27
3f5dA	-0.96
4lp8A	-0.08
2remA	-0.54
3l6tA	-0.5
3obyA	-0.07
2b4hA	0.35
2debA	1.23
3btpA	0.59
2g1uA	-0.61
2ikkA	-1.19
3hl1A	0.86
4kvzA	-0.66
2fxaA	0.22
1euwA	-0.92
4f8bA	0.1
3lxrF	-1.29
2x55A	3.66
1nytA	0.78
3kjxA	0.08
4h03A	0.74
3ojyB	3.64
4qgkA	1.74
3tjqA	2.19
3bl6A	-0.69
4nyhA	-0.66
1ow1A	-0.09
4rd8A	-0.23
2cfxA	-0.63
1ry2A	1.02
3oo8A	0.55
1yocA	-0.68
4jgtA	-0.35
3bwtA	-0.44
2h3gX	-0.7
3s55A	0.31
2obdA	-0.67
4u6rA	0.66
4le3A	2.36
2gv8A	0.95
1t3wA	-1.33
4murA	-0.92
1qazA	0.38
3byiA	-0.03
4wd6A	-0.09
3typA	-0.54
2pvuA	0.08
4o93B	-1.09
2pbyA	0.69
3qpdA	-0.78
4ea9A	-0.73
3jv7A	0.86
1vi1A	-0.77
1wa5C	-0.79
1wa5B	0.07
2h92A	-1.16
2b5nA	-0.43
3evnA	-0.81
3smjA	0.63
4omgA	-1.17
3i0wA	-0.96
3dm5A	0.15
3qk8A	1.05
3vrdB	0.14
3vrdA	-0.24
3q48A	0.42
4dezA	-0.17
2vpvA	-0.61
1tu1A	-1.8
3ekiA	-0.82
3l4aA	-0.19
12asA	-0.13
1e7wA	0.39
3gmoA	1.28
4dlqA	0
3c85A	-1.64
4e6uA	0.41
2vo8A	-0.91
3wjkA	-0.83
2aamA	-0.15
3tuiA	-0.31
2uuqA	0.39
4anrA	0.22
1oqvA	-0.83
1ispA	0.03
4um9A	1.87
2ex2A	0.46
2i5gA	0.04
4o5fA	-0.05
4nbuA	-1.12
2oq0A	-1.31
4tmdA	0.95
1icpA	0.75
4cbpA	-0.3
2zcuA	-1.28
4ua8A	1.26
2wyaA	1.37
3q2oA	-0.33
3hdfA	-0.71
2pmlX	0.2
2ywrA	-1.38
1jalA	0.61
2c41A	-1.91
2wskA	1.98
4dvkA	-0.61
3meaA	0.64
1m1hA	-0.38
2xzfA	0.02
3n90A	0.42
1vlsA	-2.04
3iijA	-0.19
1vbiA	0.34
2o0mA	-1.28
3os7A	0.08
3trdA	-1.5
2rhsA	1.37
2rhsB	-0.2
3ilvA	-0.15
2qcuA	-0.22
2cfqA	0.53
4nooA	0.65
3ibxA	-1.37
3rjvA	-0.58
1mu2A	0.1
2c7pA	0.08
4fczA	-0.37
1mvhA	2.91
1p0kA	0.02
3ocuA	0.73
1wdeA	0.33
3zjcA	-1.12
4mjkA	-0.78
4puxA	-0.32
3k2zA	-0.31
3jyzA	-0.24
4nq0A	1.36
4jj0A	1.6
3sqnA	-0.13
2v5cA	0.39
3b8iA	-1.29
4hzuS	-0.52
1tmxA	2.12
4lfyA	-0.24
1tjlA	-1.71
3qzrA	1.47
3itfA	-0.13
1miuA	1.19
3prnA	2.07
1dypA	1.46
1uf3A	-1.14
3da8A	-0.97
4hwgA	-0.96
4u4iA	1.3
4an6A	-0.01
4b60A	-0.33
4hvkA	1.15
4hqoA	2.07
3ho6A	0.04
3e97A	0
4ldsA	0.04
3i9xA	-0.36
[truncated: 14,795 more rows]

## Sheet: PDB(TESTSET)
PDB chain	PScore
2bwjA	-0.42
4j2fA	-1
2pbqA	-0.69
3vocA	1.26
1uaaA	-0.67
2i1yA	-0.45
3hn0A	-0.39
2raaA	-1.15
2e2rA	-1.13
3n2nA	-0.94
4mx6A	-0.25
3io0A	-0.94
4nx1A	-0.02
2oltA	-1.21
4aklA	0.28
3rkoD	-0.92
1yz1A	0.17
3rkoB	-0.79
3a9bA	1.46
3ue3A	0.86
4geiA	-0.57
4exrA	-1.4
4pfqA	0.35
3qleA	0.14
3eagA	0.03
3phzA	1.34
3eieA	-0.49
1pvmA	-0.08
1ur4A	0.48
4u4eA	1.35
4an8A	0.58
3fsgA	-0.73
4e0qA	-1.32
4ht3A	-0.7
3qp9A	0.85
3d00A	0.14
4jq9A	0.15
1ybhA	0.45
3u61B	-0.28
1uvqA	0.27
3q31A	-0.48
3zleA	0.62
2hhcA	1.59
3s5rA	-0.58
3e02A	0.35
1gtzA	-0.7
1dm5A	-1.16
3cg0A	0.19
1oy0A	-0.51
2cfoA	0.69
1vybA	-0.87
3hrzC	-0.57
3gygA	-0.28
1b66A	-0.76
1ytlA	-1.52
3p9vA	-1
4e3yA	0.32
1b06A	-0.05
2choA	0.91
2h5eA	0.95
2fibA	3.51
1nvtA	-1.11
1bsmA	-0.36
1ybtA	-0.68
1x9gA	-1.43
4eysA	0.18
4ft6A	0.86
2jlqA	0.75
2yglA	-0.3
2pkpA	1.53
4gwmA	1.95
2gj8A	-1.13
3rioA	-2.69
2ohdA	-0.57
2v26A	0.67
3okpA	-0.6
4humA	-0.29
3hj3A	-0.27
3h1zA	-0.95
4heaJ	-0.35
4l5tA	-0.46
4heaL	-0.02
1uasA	1.01
2qghA	0.72
3uudA	-1.95
3pplA	-0.17
1fzdA	3.33
4lisA	0.75
2wd5B	0.09
2e2dC	-1.29
4pqzA	0.2
3b55A	-0.22
4ivkA	1.5
3s0xA	-0.56
4hzoA	1.29
1vhsA	-0.22
4fvaA	0.27
3eqcA	0.84
4h1bA	1.15
3qtdA	0.82
4aumA	2.8
1ei7A	-1.45
2xwvA	-0.81
2v3cC	-0.81
4ubsA	0.32
1oe4A	0.19
2a8eA	-1.19
1a5tA	-0.77
2nsaA	-2.17
4pgrA	-1.49
4qcjA	0.71
4magA	-0.39
2qsfA	0.6
3wbpA	-1.25
3khpA	0.27
3cuqA	-0.95
2oz8A	-0.5
1kopA	0.08
3icaA	-1.68
1uirA	-0.06
2ep5A	-0.51
4ra9B	-1.76
3tjzB	0.05
1yi8A	1.1
1oaoA	0.77
4d25A	0.46
4eygA	-0.53
2o1qA	1.39
2ciwA	0.94
4m1gL	0.55
2zhzA	-0.2
2hxoA	-0.01
1ozhA	-0.46
4gi2A	0.35
4bmnA	-1.22
1h0hB	1.97
1st8A	2.09
3rkoA	-1.72
3iam2	0.35
2iqyA	0.1
2qmxA	-1.19
4j7cI	0.57
3d4iA	2
2hehA	0.46
3k0zA	-1.43
1musA	-0.52
4g4sP	-1.25
3qc0A	-0.73
3l4eA	-0.89
4ioxA	-0.16
1k78A	1.84
1j30A	-0.46
4f27A	0.23
1kmvA	0.42
3tdgA	-0.83
1lc0A	-0.84
3po3S	-0.02
3vx7B	-1.3
3fv6A	-0.77
3t24A	1.44
3f67A	-1.73
3iwtA	-1.47
3caiA	1.64
4pbhA	-0.13
3djcA	-0.6
2qwtA	-0.2
4gc0A	-0.03
3rpfA	-1.02
3r4dB	-0.39
4ty0A	1
3fgrA	0.3
3qsjA	-0.19
1dzkA	-0.53
1uedA	1.08
3asuA	0.31
4bopA	0.11
1qp8A	-0.12
3pmgA	1.2
1ufrA	-1.14
2vfkA	-1.63
2opwA	0.18
3knyA	0.05
3gv0A	0.42
2grvA	0.76
4rapA	2.01
1n4wA	1.25
1sjwA	-1.76
3fvcA	0.49
1j5wA	0.57
2c8mA	-0.46
3ievA	-0.35
4kqaA	1.07
3isrA	-0.56
3knwA	-1.69
2wryA	-0.53
4jn9A	1.25
1iz5A	-0.88
1chdA	0
4dv8A	-0.89
2wdcA	0.74
4cjdA	-0.54
4je1A	-0.59
3a8uX	0.76
3v0dA	-0.46
2q4xA	-0.35
4aq4A	0.5
3k29A	-0.84
4a25A	-2.05
4lyyA	-0.42
3gcfA	0.57
2xq1A	1.85
4mqqA	0.05
3d1kB	0.19
3wywA	-0.49
3eafA	0.54
2r751	-0.09
3g85A	-1.46
3oyyA	-0.63
4gfrA	1.68
1xeaA	-0.14
1vh5A	-0.66
3q8dA	0.8
2af0A	-1.64
1xovA	-0.2
3od5A	-1.14
4me2A	-0.33
2h88C	-2.28
4nfnA	0.55
4lcbA	-0.51
3ondA	-0.22
4eqyA	0.24
2retB	-1.41
4m0qA	-0.55
4b5nA	-0.08
3m7oA	-1.02
3goxA	-0.56
1qq5A	-0.66
4ecgA	-0.31
3na8A	-0.23
3bghA	-0.73
1g0sA	-1.03
3nqwA	-0.76
3zpjA	-0.85
2gbwA	1.38
1ycsB	-2.01
4am6A	1.32
1mpyA	0.87
1epfA	-0.2
1zauA	-0.46
3o72A	-0.29
4rotA	0.11
4jnqA	0.94
2a2mA	0.69
3qyjA	-0.1
3mkrB	1.91
3tw5A	0.55
3e29A	0
3nvoA	-0.23
4ebaA	-0.33
1wxxA	-0.37
1q0pA	-0.51
3tqyA	3.29
3osuA	-1.29
3cqlA	2.56
2d4yA	0.04
4nnbA	0.67
4knkA	1.17
3cb2A	-0.23
1wdnA	-0.34
3pzyA	-0.72
3cnyA	-0.49
4hqzA	-1.28
1v9dA	-0.82
2q86A	0.67
2pw0A	1
1zynA	-0.61
4nvsA	-1.07
3jqoA	-0.09
2pbrA	-1.33
1u5xA	-0.87
2yzsA	-0.29
4atfA	0.22
2qz7A	0.17
4m9pA	1.34
1sqgA	0.19
1hq0A	1.39
4akkA	-0.21
2vq9A	0.79
3kraB	0.41
1n4kA	0.72
4kzpA	0.73
3eirA	-0.8
4mikA	0.83
4wk0A	2.12
2ve3A	1.59
4pdpA	-0.18
3emuA	-1.47
3amiA	1.22
3qhaA	0.67
2zw3A	0.37
4exlA	-0.19
3eatX	-0.03
4j87A	-0.24
2hjpA	-0.86
1xg2B	0.77
2e8gA	0.32
2cevA	0.38
4nzjA	0.32
2w1jA	-1.09
1xxlA	-1.12
3v47C	0.97
4d1jA	0.52
4g3vA	-0.49
1b43A	2.17
2q46A	-0.92
4nmxB	1.29
3i5gB	0.26
2wmfA	1.52
4navA	-0.57
1rj9A	0.4
3uenA	-0.38
3dupA	0.62
4do4A	1.58
3vuuA	-1.02
2a38A	0.23
4fqeA	0.86
4fbjA	-0.97
3juxA	0.12
4qukA	-0.01
4rksA	0.54
3t7kA	-0.47
1tqjA	-0.65
4q40A	-0.11
3cg7A	-0.66
4agrA	-0.57
2wb0X	-0.27
4mhpA	0.19
4b09A	-1.03
3w7tA	1.49
4rasA	1.22
1ny5A	0.49
2fiaA	-1.62
1s57A	0.36
3sebA	0.45
2g0wA	-1
2pb9A	0.79
4pfsA	-0.26
2bw3A	-0.33
1o9iA	0.21
4pswB	0.41
4mrsA	0.37
2qggA	0.16
3lsnA	-0.32
2h1tA	-1.26
3cxjA	-1.33
1j32A	-0.33
1z98A	-0.44
4k6nA	0.06
4di9A	0.31
3rziA	-0.27
4px7A	-1.58
4nsvA	1.71
3fq8A	0.56
1tisA	-0.78
1fobA	-0.41
2iu5A	-2.55
2ddfA	0.91
1keaA	-0.64
4qxbA	0.14
3t90A	-0.55
4h12A	1.29
3wdqA	0.33
3m1pA	-0.5
3s79A	0.08
2fzsA	-0.74
4l8nA	0.94
2wcvA	-0.33
4q62A	-0.9
3onkA	-2.54
3bm1A	0.23
3ozpA	1.66
2ho1A	0.06
3zj0A	0.33
2jh3A	-0.08
3iteA	0.36
1a87A	2.36
4lixA	0.82
4ccdA	1.27
3c4bA	0.2
2xwuB	-0.72
1o9gA	0.62
4fr2A	-0.43
4om3A	-1.72
4mt0A	1.46
2vqpA	-0.15
3e0rA	-0.81
1xx7A	0.87
2b81A	0.3
4dd5A	-0.97
4parA	-0.74
2wlrA	2.63
1g12A	2.4
2bu3A	-0.55
4fx5A	1.44
2ii1A	1.2
3a98A	-1.06
2r5oA	0.11
2w58A	-0.03
3geeA	-0.28
3khtA	0.55
3zm1A	0.59
4i9bA	0.19
3ab8A	-0.57
1sc6A	-0.06
4hh5A	-1.06
3hgtA	0
1oy3D	1.3
1q1lA	2.01
3euoA	0.31
1m4jA	-0.29
1e1oA	0.03
3su6A	0.54
3vtxA	-1.53
3qj3A	1.12
1wueA	0.24
3m7nG	0.19
2yhsA	0.4
2xauA	0.42
2rekA	-1.44
3jzvA	0.09
3f9uA	-0.32
3tbgA	0.84
2hdiA	2.65
2bklA	0.8
1ehiA	-0.52
3ndaA	1.36
2o6pA	0.83
4fz4A	-2.07
3g91A	1.4
3cklA	0.34
3giwA	0.03
1zarA	-0.48
3mn1A	-0.2
3mk4A	0.05
3tfwA	-0.75
1w3wA	-0.59
4acoA	1.19
3u1dA	-1.77
4m23A	0.71
2bkrA	-1.79
2zfdA	-0.85
1ve3A	-0.55
2w1vA	0.13
3euhA	-0.33
2wnpF	2.56
3cwxA	-1.24
3kq0A	-0.54
2x06A	0.63
3nrgA	-1.79
1vpsA	1.25
1ywkA	-0.67
3k13A	-0.17
4maiA	1.25
2xr7A	-0.3
2f9sA	-0.83
1f2tA	-0.92
1k5dB	0.17
3o10A	-1.3
3v4vB	1.22
4nsdA	-0.33
1jhsA	-1.48
1nh8A	-0.63
3p3cA	0.04
1ohtA	1.38
1f8fA	2.4
3e4dA	0.34
4i3yA	-1.44
2gpyA	-1.06
2p17A	0.63
3ozbA	-0.5
3nh4A	-0.57
1n62C	0.36
3zlcA	0.21
4h59A	-1.27
3aamA	-0.35
4j2hA	0.11
3muxA	-0.35
2z02A	-0.79
1ls6A	0.21
3o6zA	-0.99
4h7uA	1.34
4tjvA	0.7
3sg8A	0.42
3uaqA	1.07
4g9sA	-0.91
4oseA	-1.05
1vhcA	-0.99
3aotA	-0.54
4n9wA	-0.55
1yghA	-0.32
1r61A	-0.11
1kshA	-0.24
4d2iA	-0.73
1y08A	2.31
3mr7A	0.65
4dixA	-0.89
3ixlA	-0.78
3syjA	1.92
2z73A	3.07
2nlrA	1.12
4gu7A	0.65
2ou6A	-1.17
4hstA	-0.59
3on2A	-0.79
2xq0A	-0.27
2be3A	-1.13
2a40B	0.18
4jsnC	0.58
2b0tA	-0.1
4mtnA	0.2
3p3gA	0.53
4k37A	0.6
4qyrA	1.11
2wn9A	0.49
2odfA	-0.48
4wj7A	-2.11
4djdD	-0.07
2wzoA	0.55
1q23A	-0.57
2z4uA	-0.88
3ctwB	-0.9
2c4bA	0.38
1xebA	-1.7
4bzyA	1.77
3m3iA	-0.18
1h4rA	0.55
1cg5B	-1.28
1xcrA	0.41
3s5tA	0.74
1qfhA	0.87
3h20A	1.76
1f3zA	0.01
4x33B	2.45
1qgnA	0.64
2pmvA	-0.25
1elkA	-0.56
3o2tA	-0.54
3ddcB	-0.58
4nmiA	1.19
2czlA	0.51
3zuzA	-0.12
3hmcA	0.1
2yutA	-0.62
2pofA	-0.24
3e57A	-0.86
1f08A	-1.61
4mveA	0.08
4epsA	0.13
2vcnA	-0.01
4hmwA	-0.33
3qhyB	1.4
2p1mB	1.38
1moqA	-0.19
4jdfA	-0.52
3r4vA	-0.58
3n98A	0.15
4gekA	-0.06
3ijlA	0.68
1utyA	0.04
3jszA	0.89
4p3fA	-0.41
1z8gA	1.83
1f6fA	-0.84
1t2aA	-0.64
4nrdA	1.44
1q0qA	-0.71
4de9A	-0.2
3tulA	-2.7
1w1oA	0.93
4kzkA	0.78
4bi6A	0.69
3ox4A	-0.04
1pn0A	0.56
4pqxA	-0.89
2c1wA	0.04
4rfzA	0.09
4lvfA	0.14
3mmyA	1.9
3sz7A	-1.08
3sggA	1.07
4q9mA	-0.27
2iusA	-0.16
1si5H	0.81
4izuA	0.5
4noiA	-0.32
4edgA	0.24
4j34A	-0.47
3qeeA	0.66
1pfkA	0.62
1ef8A	-0.32
4w8kA	-1.02
3v68A	0.98
4wstA	0.97
4in3B	-0.3
2qmlA	-1.61
1pjqA	-0.09
3oajA	1.49
1yg2A	-0.5
1korA	-0.83
4bhdA	-1.08
1l0wA	0
3a2qA	1.2
3nnrA	-1.29
3ripA	1.47
1mkiA	0.19
3ikbA	0.87
4m8bR	-0.52
2d1lA	0.82
3qwpA	1.14
1ykdA	-0.12
1wyuB	0.68
1wyuA	0.56
1tf1A	-0.29
2c71A	0.2
4nreA	1.18
3hb7A	-0.57
2wz1A	0.2
1p1mA	-0.87
2wvqA	0.2
2ayiA	0.83
1js3A	0.11
2dg5A	0.19
4nirA	-0.13
4lvnB	1.54
3k8uA	-1.09
4by6C	-0.87
2xdbA	-0.79
2bjqA	1.38
2hsaA	1.06
2iw2A	2.81
2ibpA	0.14
3hnaA	0.57
4ktwA	-0.98
2dvzA	0.24
1vcaA	1.69
3nrkA	-0.59
1ub7A	-0.01
2qjoA	0.32
1n62B	1.57
1tzvA	0.57
4bq6D	-0.18
3qk3A	-0.3
2xgtA	0.67
1ry9A	-1.8
3c37A	-0.24
2acvA	-0.02
3wctA	0.26
3qkxA	-2.43
2is8A	0.24
3rxzA	0.41
4lq6A	0.59
1u08A	-0.67
3cslA	2.71
3k2nA	-0.64
4m51A	0.04
4dxwA	0.24
2yavA	-0.2
4kqcA	-0.12
4i42A	0.25
4gb5A	-0.34
4k3tA	2.02
1o04A	0.58
1thtA	-1.06
2qm1A	0.02
3b6eA	0.08
3gp4A	0.06
3ue6A	-0.62
2eveA	-0.88
2qulA	-0.18
4injA	-0.25
2b2aA	-1.36
2fokA	0.33
2vpqA	0.51
2hsjA	-0.94
3cptA	-1.11
1q6wA	-1.16
3ubtA	0.31
2w5vA	0.3
4i98A	-0.09
3al5A	-0.58
1t3yA	0.74
2hykA	1.52
2c5uA	-0.26
2nn6C	-0.04
2wznA	-0.73
2nn6E	0.39
2nn6G	0.75
2nn6F	2.09
2qbyA	0.08
1xyzA	0.45
2qbyB	-0.72
4bxiA	-1.1
4b0tA	0.87
3hr6A	0.55
1rypC	1.05
3umhA	-1.65
3a06A	-0.62
3tw8B	-0.66
3m6iA	-0.02
2hcfA	0.27
3bnvA	-1.85
1ixmA	-0.48
3n53A	0.56
1s7kA	-1.44
4qn8A	-0.21
4n2kA	1.12
1qoiA	1.01
1o66A	-0.09
3necA	-0.46
3aj7A	0.4
2axcA	1.44
2v8hA	-0.09
4b4sA	-0.53
2hmvA	-0.84
3fstA	-0.8
1a7jA	0.02
4h3zA	1.13
2essA	-1.13
3c24A	0.37
4k90A	2.78
3c02A	0.23
4ryaA	-0.37
4c1wA	-0.17
1vl5A	-1.46
1sumB	-1.53
3mk7A	-0.05
3of1A	1.32
2x29A	-0.99
2ze7A	-1.32
1o0sA	0.38
2d28C	-0.19
4o2hA	-1.56
3buvA	-0.58
3dmpA	-0.46
3b9qA	-0.98
2zw5A	0.39
4eqbA	-0.87
3k1uA	-0.43
2uytA	0.07
3abqA	0.21
2f1fA	-0.47
4l7mA	-1.36
2v25A	-0.31
3wecA	0.66
3gqxA	-0.31
4c0oA	-0.2
3rznA	-0.56
1ojjA	1.49
3tx3A	-1.6
4hhjA	0.59
3s6mA	-0.12
3wc3A	2.09
1uk8A	-0.28
1knyA	-1.34
1a2zA	-0.66
1u5tA	-0.43
3nx3A	-0.84
3k7qX	0.29
3lw6A	0.19
4gxhA	-0.02
3oosA	-0.55
2gc7D	3.96
3frxA	-0.06
1edzA	-0.94
1y43B	-0.06
4c0kA	-0.07
2nraC	-1.04
4c93A	0.04
3g1pA	-0.33
4rl1A	-0.06
3tsmA	-0.49
1s70B	-0.34
4qa8A	-0.35
3bfpA	0.15
3bzmA	0.25
3e18A	0.08
3bfjA	-0.63
2fx5A	2.28
1v9tA	0.28
3rnlA	0.33
4pioA	-1.02
4ghnA	1.68
2fmyA	-1.44
3zuiA	0.12
2zjrS	-0.17
3crrA	-0.72
3e96A	-1.07
1ezwA	-0.57
4ni6A	-0.75
3etiA	-0.62
4xr7B	-0.28
3eypA	-0.03
3fzxA	0.48
2f06A	-1.06
2uzzA	0.31
2d6yA	-1.61
1vavA	0.22
3twoA	0.47
4m98A	0.73
4bfaA	-0.98
3ohmB	1.08
4km3A	-0.46
3t5aA	2.04
2a87A	0.1
3lvmA	0.46
2ogkA	-2.27
1gr0A	-0.19
3eerA	-0.59
3r89A	-1.08
1of8A	0.12
2otdA	0.51
3afnA	0.98
1qtfA	0.88
2as9A	0.36
4lruA	-0.17
2zpuA	0.25
4cp0A	2.71
4b4hA	2.58
4mtuA	-0.63
1y89A	-0.55
3gnzP	1.67
4pddA	-0.52
2de6A	-0.35
3wi3A	-0.36
3gwbA	0.79
1au1A	-1.67
1ofcX	0.2
4dimA	-0.37
2yn5A	-0.53
1rm6B	0.14
3gyxA	1.5
3p2oA	-0.37
3wl8A	1.57
3jr2A	-1.54
3i3wA	-0.01
4n18A	-1.5
3lopA	1.09
3b21A	0
3pfnA	0.02
3r6uA	0.04
2iaiA	0.67
4elnA	1.41
2zxeA	2.03
3lftA	0.13
1e8cA	-0.07
3edfA	2.1
3pukA	0.61
4uoxA	0.56
3d34A	2.06
3fvdA	0.94
3ktdA	-0.83
3tg9A	1.1
2auwA	-1.47
2w47A	0.86
3tfmA	0.71
2vpnA	1.43
3qqyA	0.51
3cf4G	-0.3
2qtcA	0.68
3k6oA	-0.35
1sjdA	0.72
1h1yA	-0.57
3kyjA	-2.29
2fdbM	-0.42
3vsjA	0.24
1oaaA	-0.34
3l1lA	-0.32
2e9qA	0.42
3dnfA	-0.96
2pfiA	-0.21
1ux6A	2.61
1a79A	-0.69
1hqkA	-1.86
3purA	-0.32
1jeoA	-0.71
4gyvA	-1.34
4cruB	-1.34
3zkvA	-0.72
2zbtA	-0.3
2ra8A	0.9
3mfdA	-1.32
4gaxA	0.09
3rqcA	-1.1
4ofcA	0.44
2gfhA	0.92
2c1hA	-0.24
4efjA	0.74
1e5eA	0.4
3irmA	1.01
3hc1A	-1.5
4qikA	-1.17
1opoA	0.31
3rosA	-0.07
3ruxA	-0.84
3vb0A	-0.66
3eo7A	0.03
4j7nA	1.95
4j4hA	0.38
4i3mA	-0.77
2qk2A	-0.47
3rc1A	-0.03
2c2jA	-1.11
3tvkA	-0.68
2cb4A	0.63
4xr9A	-0.23
3imhA	1.04
3zxyA	0.67
1g66A	2.05
3hp7A	-0.1
4ww4B	-0.4
2xocA	0.35
3lm4A	-0.02
1y0gA	-0.19
2xemA	-0.01
4q8rA	-0.14
2erfA	-0.1
4rpoA	0.42
3l8dA	-0.15
3dmqA	0.7
1i0rA	-1.24
4ptnA	-0.47
3g02A	0.25
3zo9A	2.3
1i7dA	-0.36
2dknA	-0.66
1czyA	-0.53
4ecjA	-1.75
4iciA	0.25
1u2pA	0.71
3hfqA	-0.11
2yv7A	-0.7
3oq3B	0.27
1xkrA	-1.31
1j5xA	-0.53
1qnxA	-1
3rg9A	1.22
3nybA	-0.71
4pedA	-0.57
2gjdA	-0.15
1ht6A	1.22
3cpgA	-0.77
2yxdA	-0.91
3uzuA	-0.27
3rpcA	0
3ohwA	-2.03
3ps0A	0.29
3cerA	0.32
3g33B	0.04
4arcA	0.32
4y7dA	0.3
3wu2C	0.85
2e6fA	0.85
3hhpA	-0.74
1snnA	-0.43
4cckA	-0.34
1h12A	1.77
4h6cA	1.71
3kn3A	-0.35
3ne5B	0.43
2ajrA	-0.54
4pqhA	0.05
2vfrA	0.33
3eliA	0.95
3smvA	-0.06
1extA	-0.12
1vhmA	-1.36
4dzdA	-0.16
1t3qB	0.79
3bpzA	-1.09
3ts3A	0.57
3w4sA	-0.18
4x2rA	-0.35
4l9hA	-0.78
1uj6A	0.45
3ot9A	0.08
1z2wA	-1.01
3wcyA	0.71
2i6dA	-0.64
4hzrA	-0.11
4d6qA	1.69
3jpzA	0
4u8fA	0.79
2be1A	-0.27
3cu3A	-0.95
2a9fA	-0.77
3s9dA	-0.55
1l9xA	-1.11
1eluA	1.99
2rfqA	2.2
2p2uA	-1.2
3ilxA	-2.36
2aprA	3.17
4a9aA	0.17
1ru4A	2.94
4a5sA	-0.2
1vh6A	-0.73
1l1jA	0.17
3a27A	-1.2
1ja9A	0.45
2wzmA	0.25
3rhtA	-0.25
3jsjA	-1.53
4b9cA	-1
3hzhB	-1.32
2pjdA	-0.03
1wteA	-0.37
4ttrA	-1.15
4uvbB	2.03
1w25A	-0.4
2ywvA	-0.62
4phjA	-1.19
4gx8A	-0.29
2x6hA	0.67
1wm1A	0.85
4kk7A	0.5
4xcvA	-0.47
3h5tA	-0.92
2jheA	-1.07
1sezA	0.19
1o1xA	-0.92
1v25A	0.28
3d9wA	0.69
2bl0B	-2.04
4nm9A	1.77
2vswA	-1.06
3lqmA	-1.21
1ylfA	-0.77
2rhwA	2.26
3b1fA	-0.76
2d4rA	0.19
1xrsA	-0.3
4oddA	-0.28
3uk0A	-0.05
3qzxA	-0.38
2wv3A	-0.85
2ondA	-0.64
4qt9A	1.02
3d8uA	-0.4
4eknB	0.13
3hj7A	0.35
2qtqA	-0.64
3l09A	-0.27
1mxrA	0.51
3ntlA	0.02
3cbnA	-0.75
4oaqA	1.22
3fqmA	1.1
3popA	1.22
2wwwA	-0.02
4atmA	-0.99
3ombA	-0.08
3wfdB	-0.55
4iu3A	-0.33
4e5yA	0.64
3l76A	-0.62
2i9uA	-0.56
2qorA	-0.85
3gf3A	0.88
4fd4A	-0.68
4gb32	1.36
3clvA	-1.15
2e8vA	-1.18
3bfmA	0.29
1v9kA	0.86
3vx3A	-0.09
3iekA	0.78
2rbkA	-0.48
4ky9A	-0.18
2fstX	0.05
3pxxA	0.18
1z1nX	1.49
3gfzA	-0.5
3vu4A	-0.17
1lqyA	-0.25
3u99A	0.03
3mngA	-0.73
4o38A	-0.77
4gwgA	1.07
2gwdA	0.15
3sp4A	-0.37
4oe8A	0.33
3h86A	-1.29
4oe8B	-0.49
3regA	-0.94
3b4uA	-0.46
2gfgA	-0.8
4nxyA	-0.2
1re5A	-0.24
1v9mA	0.72
3oepA	1.24
4q8gA	1.6
3apaA	0.11
2cu2A	0.9
1e4eA	0.36
1uayA	-0.29
3licA	3.47
2h1yA	-0.42
3llwA	-1.01
3t8iA	-0.73
4nekA	-0.32
3t0hA	-1.05
3g3kA	-0.37
2e50A	-1
3kheA	-1.15
3qvsA	-0.19
3v33A	-1.13
1cnvA	0.78
1kobA	0.66
2g6bA	-1.1
1zs8A	2.44
1iejA	-0.23
4dibA	-0.68
1kqnA	-0.19
3t5nA	0.55
3q0bX	-0.37
2ogtA	1.22
2xu0A	2.34
3dfgA	-0.08
3tl1A	-1.07
4chdA	-0.19
3p8bB	-0.62
1nogA	-0.39
4gizC	-1.68
3iwpA	-0.35
3rceA	-0.87
4czxA	-0.96
2xotA	0.69
3snoA	0.85
2f2lA	0.39
3ggdA	-0.92
2w3yA	0.77
4f07A	-0.48
2hn1A	-0.23
1v4pA	-1.37
4pv2A	-1.16
2wacA	-0.4
4r4kA	-1.22
3rnrA	-0.59
3exqA	-0.44
4lcqA	0.36
3hcyA	-0.77
3wdfA	-1
2w3gA	0.13
2xm5A	0.23
3zx7A	0.85
1qnwA	0.14
4oj7A	-1.75
3fs3A	-0.62
3k32A	-1.49
1wekA	-0.02
3dfuA	-0.69
2oktA	0.95
2i0mA	-2.06
5ahoA	-0.39
3e6uA	0.3
4lplA	-0.46
3mwcA	0.14
2nuwA	-0.62
3f9mA	0.85
4jobA	-0.02
3mtwA	1.53
4w6zA	1.11
3pfoA	0.65
2pkhA	-2.07
3ty4A	-0.33
1lj9A	-2.42
3fgrB	0.96
1t62A	-1.01
4pw1A	-0.01
4k0dA	-2.11
3k67A	0.19
4dqnA	1.81
4c1dA	1.09
2g3vA	-1.77
3h41A	0.77
2cxiA	-0.09
1dxeA	-0.78
2ihr1	-0.09
1f7cA	-0.45
1xm5A	-0.63
4msvA	-0.14
4g59C	0.4
3proC	-1.2
1jjvA	-1.21
2idxA	-0.51
4g0aA	0.63
3s2eA	1.2
1fviA	0.6
1reoA	0.03
3m4iA	0.62
3abaA	0.25
4fppA	-0.34
2q8nA	0.09
4m8iA	0.45
1wb9A	0.23
2x9gA	-0.17
1iqqA	-0.12
2f5xA	0.7
1eexA	1.42
1wwzA	-0.96
4mi8A	-0.7
4j1tC	-0.88
3w06A	2.27
1m4iA	0.45
3qr0A	0
4c2vA	-0.73
4p3gA	-1.04
4ofdA	0.02
2pftA	1.17
2qc1B	0.07
2bc4A	0.49
3c26A	1.11
1f00I	-0.23
4ck4A	-1.47
3qaoA	-0.33
4dooA	-0.13
1ujpA	-0.62
3kdqA	-1.23
3tmlA	-0.18
3w8kA	0.01
4f4hA	0.34
1js8A	0.05
1rfeA	-0.83
2vakA	1.45
3q12A	-1.2
3w7aA	-0.89
3kdnA	1.1
4n6kA	-0.46
2y0oA	-1.21
2fiwA	-0.66
1xynA	1.94
2gumA	1
2jl1A	-0.79
2hhzA	-1.29
3sftA	-0.84
1dnlA	-1.08
1v7lA	1.38
3l77A	0.27
1iq8A	0.1
2wqdA	-0.23
1ly1A	-1.2
2q04A	-0.56
3uf6A	-0.39
4dkcA	-0.37
2z36A	-0.35
3b0xA	-0.34
3hhsB	1.16
4cmrA	0.82
3zl8A	-0.85
3jxyA	-1.66
3azoA	2.11
4l6uA	-0.54
4e4wA	-1.55
1x8bA	-0.54
1qkkA	-0.39
1vi2A	0.21
3o0yA	0.29
4omfA	0.79
4pqgA	-0.37
3vpyA	-0.65
3ulkA	-0.9
2b5iB	0.23
1tiiA	1.21
3mmhA	-0.5
2b5iD	-0.94
3k92A	-0.22
2vxbA	-0.54
1gtmA	-0.02
2bk6A	-0.79
3vm7A	1.15
3echA	-2.1
1at0A	-0.63
1rq2A	0.44
3llvA	-0.95
4x9eA	0.32
4j5tA	0.24
3axsA	0.52
3petA	-0.38
3mwbA	-0.1
3rjuA	-0.09
4wjsA	1.68
2glfA	0.37
1aym2	0.06
3gmvX	0.11
1rvv1	-1.04
2ahmE	-1.13
2pgsA	0.3
1wthD	-0.75
1yhuC	-1.42
1yx2A	0.03
2yweA	0.08
4cu9A	0.35
3ddvA	-0.67
1i88A	-0.42
3l2dA	0.23
3mjgX	-0.12
1ukwA	-0.22
3p9aA	-0.97
3cb6A	0.54
2bibA	0.52
3hrsA	-1.97
3ojcA	-0.53
3idsA	-0.44
3fceA	0.21
3dffA	-0.41
4jggA	0.11
4aezA	0.56
1k82A	0.96
2je6I	-0.37
4cu7A	2.55
2pgeA	0.48
2je6A	-0.76
3hygB	-0.59
4jdpA	0.33
3qi7A	-0.49
1p9lA	-0.32
3adyA	-1.38
3gdmA	0.88
4o7hA	0.37
3kd6A	0.92
1vblA	1.04
3hwuA	1.52
1ta3A	0.7
3f3xA	-0.22
3zquA	-0.78
4h79A	-0.02
2f8mA	-1.2
3bcvA	0.19
3e59A	-0.34
3iuuA	-0.28
1v4aA	-0.19
5rubA	0.91
3nj2A	-1.19
3lrtA	0.31
4rxlA	-2.23
1wkbA	-0.46
4fnvA	0.79
4fukA	1.3
1np6A	-0.77
1s9rA	0.4
3al0B	-0.09
1lqtA	1.73
2r6uA	1.22
2z6iA	-0.84
2ob3A	0.19
2z8gA	1.39
3dv8A	-1.57
3tefA	-0.2
3mqlA	0.99
2p97A	-0.08
3bn3B	0.65
2x2sA	0.24
1x9nA	-0.06
3do9A	-1.27
2fh7A	0.32
1vsgA	0.18
3w54A	-0.59
4ay9X	0.27
3gn3A	-0.74
3ww9A	0.21
1p15A	-0.14
3d1nI	-2.19
4eueA	-0.05
1lurA	0.09
3r20A	-0.86
4g09A	0.29
4bx8A	-0.06
3ag6A	-0.92
4u9pA	-1.91
3vniA	0.17
2nyuA	0.13
4cpcA	-2.68
3fgaB	0.14
3kp7A	-1.23
3ozfA	0.86
4eqmA	-1.21
2yvlA	-0.89
3vylA	-0.33
3wqjA	-0.48
1nw1A	-0.1
1t47A	0.61
2p7vA	-2.38
2ol5A	-0.47
2o9xA	-0.06
3c3kA	-1.29
4q2bA	-0.12
4hpqB	-1.57
3vbbA	-0.31
3r7wB	-1.28
4jwjA	-1.63
3ni7A	-1.93
3zv4A	-0.21
1jpdX	0.28
2wi8A	-0.72
1fitA	-0.59
4hvzA	-0.3
3k26A	-0.37
4q6tA	0.73
1bi7B	-0.86
2rg8A	-0.87
2x02A	-0.65
4bhqA	-0.47
3eb2A	-0.01
4eukA	-1.1
1n67A	1.39
4bt7A	-0.11
2g84A	-0.43
4axsA	-0.39
4i0kA	-0.37
3kxrA	-1.48
4oj8A	-0.43
2xz8A	-0.87
3ic8A	-0.64
3fy4A	0.75
4pw8A	1.51
3u4tA	-1.38
4eqsA	-0.06
1w4sA	0.8
3qm2A	-0.33
2nm0A	-1.05
3hczA	-1.49
4e4uA	-0.36
3n0lA	0.41
4dapA	0.45
4nv0A	-0.77
3us3A	0.06
1qwrA	-0.15
3jrnA	-1.32
4wbsA	-0.16
2ynqA	-1.46
4icwA	-1.37
1s99A	-1.21
1iapA	-0.68
3mioA	0.1
2rckA	-1.25
1vl8A	-0.35
4ncdA	-0.58
3vxjA	2
1dlyA	-0.94
3tosA	1.33
2nrjA	-0.7
1vhoA	-0.47
4v2eA	-0.89
1r8iA	-0.61
1exrA	-1.93
3cihA	1.02
4nyzA	0.63
4f3qA	0.14
2h12A	-0.93
2ddmA	0.21
2z2uA	0.12
2xy2A	-1.13
4ngdA	0.85
4eqaC	2.6
2fhpA	3.41
3wwpA	-0.48
1zwyA	-0.75
2p0wA	-0.04
4pwyA	-0.52
2eabA	2.64
3g0kA	-0.55
2c3nA	-1.59
3o0hA	-0.02
4whsB	1.03
2zskA	0.17
4a3uA	0.53
2ah5A	-0.5
1egiA	1.7
3g5bA	0.29
2dznA	-1.58
2bi7A	1.83
3wsxA	0.99
1zsqA	1.41
3l0aA	0.33
3kg8A	0.06
3zyyX	-0.07
4igiA	-0.55
2hoeA	0.15
4r3oK	-0.82
3u0rA	0.8
2gi3A	0.65
1miwA	0.05
4r9mA	-1.93
2cfaA	-0.78
3wdsA	-1.12
4mvfA	1.9
4mjgA	-0.36
2bl2A	-0.68
1u7pA	0.41
3qc5X	0.27
1v72A	0.2
3ga4A	0.03
3l4yA	1.61
3trfA	-1.65
3nxkA	-0.15
3cvoA	1.03
3ck2A	-0.08
4p0zA	-1.55
1f28A	0.51
3ftqA	0.89
4w78A	-0.22
2q78A	-1.19
3kzhA	0.62
2gq1A	0.32
3lypA	-0.97
1yw6A	-0.25
4r12A	1.19
3dcyA	-0.07
1u9yA	-0.37
2zy4A	-0.14
4gfkA	-0.52
4mb4A	0.7
3s4lA	-0.31
3ddyA	-0.6
4l7nA	0.69
4jn3A	1.17
4n01A	0.76
3cz5A	-2.05
1g0dA	0.15
3bhoA	-0.65
1wpwA	-0.63
3pxpA	-1.7
3axbA	1.59
2qp2A	1.72
1wdcB	-0.91
2e0tA	-0.54
2zs0B	-0.38
4mj2A	2.2
1zcbA	-0.48
3zjaA	-1.28
1lcsA	4.05
4n17A	-0.11
3lhsA	-0.33
3bxjA	2.06
4dz4A	0.5
4gotA	-1.45
3mvgA	0.29
4e0eA	-0.39
2iafA	-0.86
4gpsA	-0.87
1gxjA	-0.67
1i3cA	-1.79
3af5A	-0.23
2ygtA	1.4
4giwA	-0.71
4m5dB	-1.83
1eybA	0.83
1fl2A	0.53
1ps9A	0.33
3cnbA	-0.9
3h4xA	0.49
4fs7A	-0.28
4pprA	1.44
3ca8A	-0.51
1w74A	2.47
2j3mA	0.47
3ejfA	-1.16
3dskA	0.92
3d31A	-0.37
2cveA	-0.34
3nhvA	-1.57
3kwvC	-1.56
1ct9A	-0.01
3efeA	0.63
3eo8A	-1.63
1xruA	0.6
4psrA	1.83
3m8nA	-0.56
1wduA	1.18
1s0pA	-0.66
2bhwA	0.93
3nfiA	-0.58
1mj5A	0.43
3pvdA	1.71
3k7dA	-0.71
2iswA	-0.2
3m94A	-1.19
4ei7A	-0.08
3cueA	1.31
2ltnA	0.4
3cueC	-1.03
4hkmA	0.13
4gc5A	-0.74
3swzA	-0.08
3hmuA	0.26
1luaA	1.29
1eg3A	0.73
4qr8A	0.4
2bcoA	0.41
3fpwA	-0.43
1mv5A	0.06
1vlcA	0.05
4pn0A	-0.9
4fbwA	0.59
2r2dA	0.67
1fiuA	-1.16
3m70A	-0.13
3ay2A	-0.27
3rd7A	-0.83
2gzxA	-0.71
3l6gA	-1.25
2iqcA	-1.24
1g73A	-2.6
4gv8A	-0.65
1c7nA	0.21
2p4fA	-1.24
2nvoA	-0.04
3v2uA	0.66
1l7mA	-0.79
3ct9A	0.04
4g6uA	-0.46
1ycoA	-0.45
1w4tA	0.83
2waaA	1.14
3ih6A	-0.51
2c0gA	-0.09
3lumA	2.42
1xubA	0.19
3kxqA	0.66
3k69A	-1.03
4avaA	-0.46
1of5B	1.43
4eo7A	-1.05
2amhA	0.01
2d5rA	-1.59
3g7mA	2.46
4xxtA	0.42
4ql6A	0.49
2i0kA	2.18
3tkfA	-1.17
4qiiA	0.37
2r0bA	-0.18
3ia2A	1.76
2dlaA	-0.94
2z0fA	0.33
1h2iA	0.44
3q6dA	1.17
3buuA	-0.46
3n3yA	0.08
2fsxA	-0.44
2oo3A	-0.19
2fnoA	-0.24
1ye8A	0.56
4fxtA	0.21
2al6A	-0.53
2y5nA	1.65
2pbfA	0.42
3x17A	1.42
3e48A	-0.32
4mzaA	0.82
1fx0A	-0.2
4k4kA	1.3
1c3pA	0.47
2qrdE	-0.92
1dljA	-0.07
1u02A	0.5
1g3nC	1.07
3ceiA	-0.49
1xm7A	-0.52
4igvA	-1.37
3exmA	-0.11
3t8qA	0.03
3e3uA	0.8
4p5eA	-0.89
2z6rA	-0.71
2c5qA	-0.63
4ifqA	0.31
2eg4A	0.39
2gakA	1.19
1vc4A	1.15
3e1iB	2.66
1mtyB	0.39
1j3aA	-0.4
3sybA	2.04
2i6eA	0.62
4cvyA	-0.95
3bf7A	0.17
1y6hA	0.56
1zxxA	0.91
2bsyA	0.6
2g7uA	-0.95
4ldvA	-0.09
3euaA	-0.84
3gbhA	-0.23
2c4wA	-0.46
4oi4A	0.08
4gnxC	2.7
1vpxA	-1.25
4a04A	-1.34
2plcA	-0.53
3d3kA	0
1earA	-0.6
1gmuA	-0.98
4f4fA	0.61
3d2uA	1.43
1to0A	0.5
3gziA	-1.32
3egnA	-0.44
1f1eA	-1.72
1yudA	-0.74
4js1A	-0.29
3gg9A	-0.07
4qlbA	0.27
2epgA	0.6
4eclA	-0.04
4luiA	-1.17
4hz8A	0.91
3hzsA	-0.58
3o66A	-0.82
2qkiB	-1.53
2gigA	-1.49
4aieA	-0.1
3dktA	0.2
2ac3A	0.26
3pf2A	0.04
1x0pA	-0.99
3pviA	-1.48
4j0eA	-0.69
4qkyA	1.85
3pc3A	0.16
4dmiA	-0.99
4u7uA	-0.21
4a2pA	-0.11
4ftdA	1.4
1vq2A	-0.74
3t1oA	-0.73
4j8pA	-0.85
4dyqA	-0.98
2ia2A	-0.21
3mxmA	-0.18
4fbzA	-0.79
3delB	-0.47
3ez2A	-0.28
2wm3A	0.13
1yq1A	-0.15
2wbqA	-0.45
4inoA	0.05
3p96A	-0.74
3lnlA	0.28
2ptfA	-0.8
2e9xB	-0.63
1nuuA	-1.27
3nt8A	2.82
3i4pA	-1.73
1vi0A	0.17
2zcxA	-0.28
2o3iA	1.1
2bh9A	0.19
4xeqA	-0.98
2pjuA	-0.67
4wecA	-0.3
1hdkA	-0.6
1husA	-1.91
3kb6A	-0.97
4fdwA	0.47
4beuA	0.54
4pzaA	0.61
3m8oL	-0.06
4cz8A	-0.82
1jscA	0.38
4mruA	1.58
4hh8A	-0.17
3we5A	-0.47
3cf6E	0.31
3wvqA	0.89
2p9bA	-0.38
1skyB	0.7
3menA	-0.23
3tc3A	-1.33
4bqhA	0.53
1ms9A	0.31
3rtxA	-0.44
2q37A	-0.64
1nnlA	-0.39
4pmkA	3.59
3s2uA	1.25
3cb0A	-1.06
2wvlA	0.39
1wscA	-0.76
4c72A	1.07
3c7fA	2.69
3k7uC	-0.17
3ve9A	0.03
4fe9A	1.8
3hn2A	-0.53
2f31A	-0.63
1i39A	0.64
2pptA	-2.15
4h4dA	-0.57
1em2A	-0.09
1a6jA	-1.4
3zyiA	-0.31
1bwdA	-0.52
4usrA	0.73
3bchA	-0.36
3pl2A	0.12
3b49A	-0.23
3pg5A	0.76
1nd6A	-0.06
2wuxA	-0.67
1reqA	0.73
3vteA	0.17
4ebbA	1.41
4jhdC	0.33
3u4kA	0.78
2ohoA	-0.85
2qy0A	0.29
1vdrA	-0.02
3ck1A	0.72
1oahA	0.43
3um9A	-0.01
3kwuA	0.05
3hrgA	-0.37
4p02A	0.67
3w36A	1.16
4kc5A	1.6
2q2eB	1.03
3ndzA	-0.08
1azwA	0.99
4jr9A	0.52
3mc0B	-0.13
1lehA	0.82
3ec3A	-0.36
3jumA	0.45
1yf2A	0.87
2xfaA	-1.15
2nutA	0.91
1wwmA	-1.08
3we0A	1.68
2uwaA	0.97
2janA	0.82
4m16A	0.11
3mpoA	-0.63
1ks8A	2.29
2py6A	1.06
2dg8A	-1.56
4xaqA	0.85
2w2rA	0.21
2y6uA	-0.47
4q46A	-0.39
3if8A	-0.07
3vsjB	-0.22
3m84A	-0.52
3kvcA	0.29
4br6A	-0.3
2va1A	-1.09
3k6kA	0.79
3tzqA	0.1
2cklB	-0.82
3bjqA	2.22
4i5tA	-0.52
1dquA	-0.33
2yr1A	-0.83
4wksC	0.98
3cxbA	-1.26
2gwgA	0.74
3wo4C	-0.25
3ilsA	0.98
4qs8A	0.47
1uf2C	0.55
4ptbA	0.13
4tx1A	1.57
4n7bA	-0.29
4lg8A	0.17
4hn1A	0.46
2gqwA	-0.19
4r1dB	-0.13
3icfA	0.59
1s5jA	0.25
3dsdA	1.24
3nfwA	-0.05
2qmaA	-1.07
3hinA	-0.67
3q6kA	0.2
1y5eA	-1.56
2r6aA	-0.17
1wchA	0.3
3hwoA	1.86
1id0A	-1.48
2sasA	0.55
3ozxA	-0.13
4n0tA	-0.21
3stjA	-0.47
1wy7A	-0.51
1vqqA	0.13
1g62A	0.52
1vknA	0.04
3ottA	1.15
2vclA	-0.39
1sfnA	-0.61
3nqnA	-0.42
3na7A	1.72
2qjtA	-0.43
2jgnA	-1.37
4f0qA	0.13
4ag1A	0.52
3rd3A	-0.73
3ek6A	0.41
3rd6A	1.42
2p22C	-1.73
2bkxA	1.36
2y53A	0.91
4gniA	-0.15
3kwkA	-1.5
4hpnA	0.74
4hbsA	0.85
1rzhM	-1.18
1yb4A	-0.59
2yicA	0.87
3bqaA	-2.27
2zwaA	0.67
2r2yA	0.11
2erxA	0.37
2yb1A	0.58
4d6gA	0.12
3fimB	0.69
2pk0A	-1.6
4c1uA	-0.02
4g1qB	0.5
1ekqA	-0.84
1gkpA	0.16
2gjxA	1.15
3eprA	-0.68
2wjrA	0.25
2xomA	0.2
4j94A	1.98
3hhtB	0.42
4folA	1.28
4ijnA	0.26
3q39A	1.37
3ihtA	-0.63
2pnfA	-0.97
3pvzA	-0.14
4uyiA	-1.41
4mlwA	-0.59
1y2mA	-0.14
2fhdA	-1.1
2nnnA	0.11
2o3jA	0.03
4i1kA	-1.07
3e13X	-0.53
2izoA	2.75
2yquA	-0.21
3sztA	-0.46
3tv0A	0.02
2cbyA	-1.39
3zwfA	-0.27
4en2A	-0.5
4revA	0.18
2nrhA	-1.3
4dveA	-0.22
2xlgA	0.36
1j9lA	0.38
1epaA	-1.15
3ik4A	1.27
4r9nA	-1.09
3kljA	-0.43
1x8qA	0.18
3ch0A	-0.93
3kv9A	-0.44
1w9cA	-0.77
3n0xA	0.41
1fx3A	-1.59
1t3gA	-2.09
4mudA	-2.27
3gd0A	1.59
3lasA	-0.76
1p4uA	1.22
3ubyA	1.91
1ik9A	0.69
1j1jA	-0.57
2vt3A	-0.4
4kxvA	0.86
2qpwA	0.94
4um9B	4.42
4qytA	-1.03
1h6hA	-0.64
2i14A	0.16
3lmmA	-1.03
1e4cP	-0.4
3v3nA	0.97
3uknA	-1.94
1qorA	-0.22
3nz2A	-1.11
2i1sA	-0.62
2z84A	1.7
1iynA	0.71
3f7qA	0.37
3bzbA	-0.43
[truncated: 1,407 more rows]
